# Supplementary material for: An Integrated Transcriptomic and Proteomic Analysis Identifies Significant Novel Pathways for Henoch-Schönlein Purpura Nephritis Progression
Source: Biomed Res Int. 2020 Jun 19;2020:2489175. doi: 10.1155/2020/2489175 (PMC7322592; doi:10.1155/2020/2489175)
Supplement: Supplementary Materials — .Supplementary Figure S1: images of renal pathological sections of HSPN patients. (A) Type 1. (B) Type 2. (C) Type 3. Supplementary Figure S2: PCA score plots for discriminating samples within the different groups. Supplementary Figure S3: correlation analysis of differentially expressed mRNAs and proteins between different types of HSPN. Supplementary Table S1: list of quantitated 24,493 mRNAs and 592 proteins. Supplementary Table S2: list of differentially expressed mRNAs between different HSPN types. Supplementary Table S3: list of differentially expressed proteins between different HSPN types. Supplementary Table S4: list of DEGs which were differentially expressed between HSPN type 1 and HSPN type 2 and HSPN type 2 and HSPN type 3. Supplementary Table S5: the significant pathways enriched by DEGs between different HSPN types. Supplementary Table S6: the correlation coefficients between differentially expressed genes in four pathways and clinical biochemical indicators. Supplementary Table S7: list of mRNAs and proteins selected for validation. Supplementary Table S8: the significant pathways enriched by downregulated DEGs between HSP and HSPN. Supplementary Table S9: list of differentially expressed mRNAs between HSP and HSPN. Supplementary Table S10: the differentially expressed genes in four pathways negative regulation of the JAK-STAT cascade and so on. [file 2489175.f1.zip › Supplementary Table S1.xlsx]

## Sheet: mRNAs
Supplementary Table S1 List of quantitated 24,493 mRNAs and 592 proteins
Column A: Track_id, The database name in transcript level. Column B: Trans_Name, The name of transcript. Column C: Gene_id, The ENSEMBL gene id of transcript. Column D: Gene_Name, The name of gene. Column E: Locus, The genomic coordinates of transcript. Column F: Strand, The strand of transcript. Column G: Trans_Type, The biological type of transcript.
Transcript Information
Track_id	Trans_Name	Gene_id	Gene_Name	Locus	Strand	Trans_Type
ENST00000000233.9_1	ARF5-201	ENSG00000004059.10_4	ARF5	chr7:127228399-127231759	+	protein_coding
ENST00000000412.3	M6PR-001	ENSG00000003056.3	M6PR	chr12:9092961-9102551	-	protein_coding
ENST00000000442.10_1	ESRRA-201	ENSG00000173153.13_3	ESRRA	chr11:64073050-64084210	+	protein_coding
ENST00000001008.5_1	FKBP4-201	ENSG00000004478.7_2	FKBP4	chr12:2904119-2914589	+	protein_coding
ENST00000002165.10_1	FUCA2-201	ENSG00000001036.13_2	FUCA2	chr6:143815948-143832827	-	protein_coding
ENST00000002829.7_2	SEMA3F-201	ENSG00000001617.11_2	SEMA3F	chr3:50192562-50226508	+	protein_coding
ENST00000003302.8_1	USP28-201	ENSG00000048028.11_3	USP28	chr11:113668596-113746292	-	protein_coding
ENST00000003912.7_2	NIPAL3-201	ENSG00000001461.16_2	NIPAL3	chr1:24742293-24799466	+	protein_coding
ENST00000004982.5_2	HSPB6-201	ENSG00000004776.12_2	HSPB6	chr19:36245470-36247930	-	protein_coding
ENST00000005178.5_1	PDK4-201	ENSG00000004799.7_2	PDK4	chr7:95212811-95225803	-	protein_coding
ENST00000005257.6_1	RALA-201	ENSG00000006451.7_3	RALA	chr7:39663082-39747723	+	protein_coding
ENST00000005340.9_1	DVL2-201	ENSG00000004975.11_2	DVL2	chr17:7128660-7137864	-	protein_coding
ENST00000005386.7_1	RPAP3-201	ENSG00000005175.9_3	RPAP3	chr12:48055032-48099844	-	protein_coding
ENST00000005558.8_1	IFRD1-201	ENSG00000006652.13_3	IFRD1	chr7:112063199-112115582	+	protein_coding
ENST00000006015.3_1	HOXA11-201	ENSG00000005073.5_2	HOXA11	chr7:27221134-27224835	-	protein_coding
ENST00000006275.8_1	TRAPPC6A-201	ENSG00000007255.10_2	TRAPPC6A	chr19:45666186-45681495	-	protein_coding
ENST00000006750.7_1	CD79B-201	ENSG00000007312.12_2	CD79B	chr17:62006100-62009714	-	protein_coding
ENST00000007390.2_1	TSR3-201	ENSG00000007520.3_2	TSR3	chr16:1399241-1401912	-	protein_coding
ENST00000007516.7_1	NDUFAB1-201	ENSG00000004779.9_2	NDUFAB1	chr16:23592323-23607677	-	protein_coding
ENST00000008180.13_1	IL32-201	ENSG00000008517.16_4	IL32	chr16:3115632-3119820	+	protein_coding
ENST00000008391.3_1	TFAP2D-201	ENSG00000008197.4_2	TFAP2D	chr6:50681541-50740701	+	protein_coding
ENST00000008527.9_1	CRY1-201	ENSG00000008405.11_3	CRY1	chr12:107385142-107487607	-	protein_coding
ENST00000008938.4_1	PGLYRP1-201	ENSG00000008438.4_2	PGLYRP1	chr19:46522411-46526323	-	protein_coding
ENST00000009041.11_1	STARD3NL-201	ENSG00000010270.13_2	STARD3NL	chr7:38217824-38270272	+	protein_coding
ENST00000009180.8_1	CD9-201	ENSG00000010278.12_3	CD9	chr12:6309615-6347425	+	protein_coding
ENST00000009530.11_1	CD74-201	ENSG00000019582.14_3	CD74	chr5:149781715-149792314	-	protein_coding
ENST00000009589.7_1	RPS20-201	ENSG00000008988.9_2	RPS20	chr8:56985506-56987065	-	protein_coding
ENST00000011619.5_1	RANBP9-201	ENSG00000010017.12_2	RANBP9	chr6:13621730-13711796	-	protein_coding
ENST00000011653.8_1	CD4-201	ENSG00000010610.9_3	CD4	chr12:6898638-6929974	+	protein_coding
ENST00000011691.5_2	SS18L2-201	ENSG00000008324.11_2	SS18L2	chr3:42632330-42636488	+	protein_coding
ENST00000011898.9_1	TSPAN9-201	ENSG00000011105.12_3	TSPAN9	chr12:3186543-3395724	+	protein_coding
ENST00000012443.8_1	PPP5C-201	ENSG00000011485.14_2	PPP5C	chr19:46850251-46894109	+	protein_coding
ENST00000013070.10_1	UBR7-201	ENSG00000012963.14_3	UBR7	chr14:93673401-93695561	+	protein_coding
ENST00000013125.8_1	MAP4K5-201	ENSG00000012983.11_2	MAP4K5	chr14:50885243-50999327	-	protein_coding
ENST00000013807.9_1	ERCC1-201	ENSG00000012061.15_3	ERCC1	chr19:45916692-45926824	-	protein_coding
ENST00000014930.8_1	HEBP1-201	ENSG00000013583.8_3	HEBP1	chr12:13127798-13153207	-	protein_coding
ENST00000016171.5_1	COX15-201	ENSG00000014919.12_2	COX15	chr10:101473272-101491857	-	protein_coding
ENST00000016946.7_1	RGPD5-201	ENSG00000015568.12_2	RGPD5	chr2:110551885-110615270	+	protein_coding
ENST00000017003.6_1	XYLT2-201	ENSG00000015532.9_2	XYLT2	chr17:48423453-48438512	+	protein_coding
ENST00000019019.6_1	FTSJ1-201	ENSG00000068438.14_2	FTSJ1	chrX:48334549-48344687	+	protein_coding
ENST00000019317.8_1	RALBP1-201	ENSG00000017797.12_3	RALBP1	chr18:9475007-9538112	+	protein_coding
ENST00000022615.8_1	VDAC3-201	ENSG00000078668.13_3	VDAC3	chr8:42249421-42263415	+	protein_coding
ENST00000025008.9_1	RB1CC1-201	ENSG00000023287.12_3	RB1CC1	chr8:53535016-53626992	-	protein_coding
ENST00000025301.3_1	AKAP11-201	ENSG00000023516.8_2	AKAP11	chr13:42846289-42897403	+	protein_coding
ENST00000031146.8_2	SLC39A9-201	ENSG00000029364.11_2	SLC39A9	chr14:69865409-69929098	+	protein_coding
ENST00000033079.7_2	FAM13B-201	ENSG00000031003.10_3	FAM13B	chr5:137273649-137368720	-	protein_coding
ENST00000035307.6_1	CHPF2-201	ENSG00000033100.16_3	CHPF2	chr7:150929585-150935913	+	protein_coding
ENST00000037243.6_1	GABARAPL2-201	ENSG00000034713.7_2	GABARAPL2	chr16:75600249-75611779	+	protein_coding
ENST00000038176.7_1	NSMAF-201	ENSG00000035681.7_3	NSMAF	chr8:59496063-59572403	-	protein_coding
ENST00000039989.8_1	TTC17-201	ENSG00000052841.14_3	TTC17	chr11:43380491-43516483	+	protein_coding
ENST00000040738.9_1	BOD1L1-201	ENSG00000038219.12_2	BOD1L1	chr4:13570362-13629347	-	protein_coding
ENST00000040877.1_1	TARBP1-201	ENSG00000059588.9_2	TARBP1	chr1:234527059-234614849	-	protein_coding
ENST00000043402.7_1	RTN4R-201	ENSG00000040608.13_3	RTN4R	chr22:20228938-20256054	-	protein_coding
ENST00000044462.11_1	PSMA4-201	ENSG00000041357.15_2	PSMA4	chr15:78832755-78844761	+	protein_coding
ENST00000046640.7_1	CTNS-201	ENSG00000040531.14_3	CTNS	chr17:3539762-3564832	+	protein_coding
ENST00000046794.9_1	LCP2-201	ENSG00000043462.11_2	LCP2	chr5:169673241-169725231	-	protein_coding
ENST00000052569.10_2	GOPC-201	ENSG00000047932.13_3	GOPC	chr6:117881432-117923691	-	protein_coding
ENST00000053243.5_2	TNFRSF17-201	ENSG00000048462.10_4	TNFRSF17	chr16:12058964-12061925	+	protein_coding
ENST00000053468.3_1	MRPS10-201	ENSG00000048544.5_2	MRPS10	chr6:42174539-42185603	-	protein_coding
ENST00000053867.7_1	GRN-201	ENSG00000030582.17_3	GRN	chr17:42422454-42430470	+	protein_coding
ENST00000054650.8_1	THAP3-201	ENSG00000041988.15_4	THAP3	chr1:6684926-6693625	+	protein_coding
ENST00000054666.10_1	VAMP3-201	ENSG00000049245.12_3	VAMP3	chr1:7831329-7841492	+	protein_coding
ENST00000054950.3_1	RCN1-201	ENSG00000049449.8_3	RCN1	chr11:32112450-32127301	+	protein_coding
ENST00000055077.7_1	RFC2-201	ENSG00000049541.10_3	RFC2	chr7:73645867-73668774	-	protein_coding
ENST00000055335.10_2	PPP1R3F-201	ENSG00000049769.12_3	PPP1R3F	chrX:49126317-49144557	+	protein_coding
ENST00000056217.9_1	ARHGEF5-201	ENSG00000050327.14_3	ARHGEF5	chr7:144052433-144077725	+	protein_coding
ENST00000064571.2_1	CBLN4-201	ENSG00000054803.3_2	CBLN4	chr20:54572496-54580528	-	protein_coding
ENST00000064778.8_1	FAM168A-201	ENSG00000054965.10_2	FAM168A	chr11:73111532-73309234	-	protein_coding
ENST00000064780.6_1	RELT-201	ENSG00000054967.12_2	RELT	chr11:73087309-73108517	+	protein_coding
ENST00000066544.7_1	CDC27-201	ENSG00000004897.11_3	CDC27	chr17:45195069-45266632	-	protein_coding
ENST00000072644.6_2	YIPF1-201	ENSG00000058799.14_2	YIPF1	chr1:54317406-54355507	-	protein_coding
ENST00000072869.8_1	ADCK2-201	ENSG00000133597.10_3	ADCK2	chr7:140372953-140394921	+	protein_coding
ENST00000074304.9_1	INPP4A-201	ENSG00000040933.15_2	INPP4A	chr2:99061321-99207496	+	protein_coding
ENST00000075120.11_1	SLC2A3-201	ENSG00000059804.15_2	SLC2A3	chr12:8071826-8088871	-	protein_coding
ENST00000078429.8_1	GNA11-201	ENSG00000088256.8_2	GNA11	chr19:3094408-3124002	+	protein_coding
ENST00000078445.6_1	CREB3L3-201	ENSG00000060566.13_2	CREB3L3	chr19:4153598-4173051	+	protein_coding
ENST00000080059.11_1	HDAC7-201	ENSG00000061273.17_3	HDAC7	chr12:48176505-48213568	-	protein_coding
ENST00000081029.7_1	MRPS35-201	ENSG00000061794.12_3	MRPS35	chr12:27863706-27909228	+	protein_coding
ENST00000083182.7_1	APPBP2-201	ENSG00000062725.9_2	APPBP2	chr17:58520510-58603580	-	protein_coding
ENST00000084795.9_3	RPL18-201	ENSG00000063177.12_3	RPL18	chr19:49118588-49121141	-	protein_coding
ENST00000084798.8_1	CA11-201	ENSG00000063180.8_2	CA11	chr19:49141199-49149569	-	protein_coding
ENST00000085079.11_1	EPN1-201	ENSG00000063245.14_3	EPN1	chr19:56186611-56207132	+	protein_coding
ENST00000085219.9_1	CD22-201	ENSG00000012124.16_3	CD22	chr19:35820090-35838258	+	protein_coding
ENST00000155093.7_1	ZFY-201	ENSG00000067646.11_2	ZFY	chrY:2803518-2850546	+	protein_coding
ENST00000155840.9_1	KCNQ1-201	ENSG00000053918.15_3	KCNQ1	chr11:2466221-2870339	+	protein_coding
ENST00000155858.10_1	TRPM5-201	ENSG00000070985.13_2	TRPM5	chr11:2425745-2444275	-	protein_coding
ENST00000155926.8_1	TRIB2-201	ENSG00000071575.11_2	TRIB2	chr2:12857015-12882860	+	protein_coding
ENST00000156084.8_1	OTUD5-201	ENSG00000068308.13_3	OTUD5	chrX:48779488-48814893	-	protein_coding
ENST00000156109.6_1	GPKOW-201	ENSG00000068394.10_2	GPKOW	chrX:48970327-48980151	-	protein_coding
ENST00000156471.9_1	AQR-201	ENSG00000021776.10_3	AQR	chr15:35143983-35262040	-	protein_coding
ENST00000156825.5_1	MBD3-201	ENSG00000071655.17_3	MBD3	chr19:1573595-1592800	-	protein_coding
ENST00000157600.7_2	LMCD1-201	ENSG00000071282.11_2	LMCD1	chr3:8543393-8616359	+	protein_coding
ENST00000157812.6_1	PSMC4-201	ENSG00000013275.7_2	PSMC4	chr19:40476912-40487348	+	protein_coding
ENST00000158762.7_1	ACAP1-201	ENSG00000072818.11_2	ACAP1	chr17:7239848-7254797	+	protein_coding
ENST00000158771.8_1	DERL2-201	ENSG00000072849.10_3	DERL2	chr17:5374571-5389537	-	protein_coding
ENST00000160262.9_1	ICAM3-201	ENSG00000076662.9_3	ICAM3	chr19:10444452-10450499	-	protein_coding
ENST00000161863.8_1	YTHDC2-201	ENSG00000047188.15_2	YTHDC2	chr5:112849380-112930981	+	protein_coding
ENST00000162391.7_1	FOXJ2-201	ENSG00000065970.8_2	FOXJ2	chr12:8185299-8208099	+	protein_coding
ENST00000162749.6_1	TNFRSF1A-201	ENSG00000067182.7_2	TNFRSF1A	chr12:6437923-6451280	-	protein_coding
ENST00000163416.6_1	GOLGA5-201	ENSG00000066455.12_2	GOLGA5	chr14:93260576-93306308	+	protein_coding
ENST00000164024.4_1	CELSR3-201	ENSG00000008300.16_3	CELSR3	chr3:48673902-48700348	-	protein_coding
ENST00000164133.6_1	PPP2R5B-201	ENSG00000068971.13_3	PPP2R5B	chr11:64692143-64701945	+	protein_coding
ENST00000164139.3_1	PYGM-201	ENSG00000068976.13_2	PYGM	chr11:64513861-64527769	-	protein_coding
ENST00000164227.9_1	BCL3-201	ENSG00000069399.14_3	BCL3	chr19:45251804-45263301	+	protein_coding
ENST00000164247.5_1	KCNAB2-201	ENSG00000069424.14_2	KCNAB2	chr1:6094343-6161239	+	protein_coding
ENST00000164305.9_1	PIGB-201	ENSG00000069943.9_2	PIGB	chr15:55611158-55647846	+	protein_coding
ENST00000165698.9_1	REEP1-201	ENSG00000068615.17_3	REEP1	chr2:86441116-86564777	-	protein_coding
ENST00000166139.8_1	FSTL3-201	ENSG00000070404.9_3	FSTL3	chr19:676365-683399	+	protein_coding
ENST00000167106.8_2	VASH1-201	ENSG00000071246.10_3	VASH1	chr14:77228532-77249358	+	protein_coding
ENST00000168216.10_1	HSD17B10-201	ENSG00000072506.12_3	HSD17B10	chrX:53458206-53461320	-	protein_coding
ENST00000169298.7_1	ST6GAL1-201	ENSG00000073849.14_3	ST6GAL1	chr3:186648274-186796341	+	protein_coding
ENST00000170168.8_1	REXO1-201	ENSG00000079313.13_3	REXO1	chr19:1815245-1848462	-	protein_coding
ENST00000170447.11_1	MKRN2-201	ENSG00000075975.15_2	MKRN2	chr3:12598513-12625212	+	protein_coding
ENST00000170564.6_1	GPATCH1-201	ENSG00000076650.6_2	GPATCH1	chr19:33571786-33621448	+	protein_coding
ENST00000171111.9_2	KEAP1-201	ENSG00000079999.13_3	KEAP1	chr19:10596796-10614417	-	protein_coding
ENST00000171757.2_1	P2RY10-201	ENSG00000078589.12_2	P2RY10	chrX:78200918-78217451	+	protein_coding
ENST00000171887.8_1	TNS1-201	ENSG00000079308.16_3	TNS1	chr2:218664512-218808851	-	protein_coding
ENST00000172229.7_1	NGFR-201	ENSG00000064300.8_3	NGFR	chr17:47572655-47592379	+	protein_coding
ENST00000173229.6_1	NTN1-201	ENSG00000065320.8_2	NTN1	chr17:8924859-9147317	+	protein_coding
ENST00000173527.5_1	ISOC1-201	ENSG00000066583.11_3	ISOC1	chr5:128430444-128449721	+	protein_coding
ENST00000174618.4_1	MNT-201	ENSG00000070444.14_2	MNT	chr17:2287354-2304412	-	protein_coding
ENST00000175091.4_1	LAPTM4A-201	ENSG00000068697.6_2	LAPTM4A	chr2:20232411-20251789	-	protein_coding
ENST00000175506.8_1	ASNS-201	ENSG00000070669.16_3	ASNS	chr7:97481430-97501854	-	protein_coding
ENST00000175756.9_1	PTPN18-201	ENSG00000072135.12_3	PTPN18	chr2:131113580-131132982	+	protein_coding
ENST00000176763.9_1	STK10-201	ENSG00000072786.12_2	STK10	chr5:171469077-171615390	-	protein_coding
ENST00000177694.1_1	TBX21-201	ENSG00000073861.2_2	TBX21	chr17:45810610-45823485	+	protein_coding
ENST00000177742.7_1	MRPS34-201	ENSG00000074071.14_3	MRPS34	chr16:1821891-1823151	-	protein_coding
ENST00000178640.9_1	MAP2K5-201	ENSG00000137764.19_3	MAP2K5	chr15:67835047-68099461	+	protein_coding
ENST00000180173.9_1	MTMR7-201	ENSG00000003987.13_2	MTMR7	chr8:17155539-17270836	-	protein_coding
ENST00000181796.6_1	FAM107B-201	ENSG00000065809.13_3	FAM107B	chr10:14560559-14816896	-	protein_coding
ENST00000181839.8_1	CDK13-201	ENSG00000065883.14_2	CDK13	chr7:39989636-40136733	+	protein_coding
ENST00000182290.8_1	TSPAN32-201	ENSG00000064201.15_3	TSPAN32	chr11:2323243-2339372	+	protein_coding
ENST00000182527.3_1	TRAM2-201	ENSG00000065308.4_2	TRAM2	chr6:52362200-52441713	-	protein_coding
ENST00000184266.2_1	NDUFB4-201	ENSG00000065518.7_2	NDUFB4	chr3:120315156-120321347	+	protein_coding
ENST00000184956.10_1	HEATR6-201	ENSG00000068097.14_3	HEATR6	chr17:58120555-58156292	-	protein_coding
ENST00000185150.8_3	ERLEC1-201	ENSG00000068912.13_3	ERLEC1	chr2:54014217-54045956	+	protein_coding
ENST00000186436.9_1	TMEM131-201	ENSG00000075568.16_2	TMEM131	chr2:98372803-98612354	-	protein_coding
ENST00000188312.6_1	ACTR6-201	ENSG00000075089.9_3	ACTR6	chr12:100593865-100618201	+	protein_coding
ENST00000188376.9_2	SLC25A3-201	ENSG00000075415.12_3	SLC25A3	chr12:98987403-98995775	+	protein_coding
ENST00000191018.9_1	CTSA-201	ENSG00000064601.16_2	CTSA	chr20:44519980-44527459	+	protein_coding
ENST00000192788.5_1	UHRF1BP1-201	ENSG00000065060.16_2	UHRF1BP1	chr6:34759857-34845291	+	protein_coding
ENST00000193322.7_2	OSTM1-201	ENSG00000081087.14_3	OSTM1	chr6:108362613-108395941	-	protein_coding
ENST00000193403.10_4	ACTN1-201	ENSG00000072110.13_4	ACTN1	chr14:69340860-69446157	-	protein_coding
ENST00000194152.3_1	PCDHB4-201	ENSG00000081818.3_2	PCDHB4	chr5:140501381-140505205	+	protein_coding
ENST00000194214.9_1	HSPB11-201	ENSG00000081870.11_2	HSPB11	chr1:54387234-54411602	-	protein_coding
ENST00000194530.7_1	STRADB-201	ENSG00000082146.12_2	STRADB	chr2:202316392-202345569	+	protein_coding
ENST00000196061.4_1	PLOD1-201	ENSG00000083444.16_2	PLOD1	chr1:11994810-12035594	+	protein_coding
ENST00000196169.7_2	TDRD3-201	ENSG00000083544.13_3	TDRD3	chr13:60970591-61148012	+	protein_coding
ENST00000196371.9_1	OXCT1-201	ENSG00000083720.12_2	OXCT1	chr5:41730167-41870621	-	protein_coding
ENST00000196482.3_1	ZNF324-201	ENSG00000083812.11_3	ZNF324	chr19:58978463-58984765	+	protein_coding
ENST00000196551.7_2	RPS5-201	ENSG00000083845.8_2	RPS5	chr19:58898636-58906170	+	protein_coding
ENST00000198536.6_3	PILRA-201	ENSG00000085514.15_4	PILRA	chr7:99971068-99997722	+	protein_coding
ENST00000198767.10_1	RRN3-201	ENSG00000085721.12_2	RRN3	chr16:15153879-15188174	-	protein_coding
ENST00000199320.8_1	DIMT1-201	ENSG00000086189.9_2	DIMT1	chr5:61683081-61699760	-	protein_coding
ENST00000199389.10_1	EIF2AK1-201	ENSG00000086232.12_3	EIF2AK1	chr7:6061875-6098861	-	protein_coding
ENST00000199447.8_1	NME8-201	ENSG00000086288.11_3	NME8	chr7:37888199-37940003	+	protein_coding
ENST00000199448.8_2	EPDR1-201	ENSG00000086289.11_3	EPDR1	chr7:37960163-37991543	+	protein_coding
ENST00000199706.12_2	MRPL28-201	ENSG00000086504.15_2	MRPL28	chr16:417384-420527	-	protein_coding
ENST00000199708.2_1	HBQ1-201	ENSG00000086506.2_2	HBQ1	chr16:230452-231180	+	protein_coding
ENST00000199764.6_1	CEACAM6-201	ENSG00000086548.8_3	CEACAM6	chr19:42259329-42276113	+	protein_coding
ENST00000199814.8_1	RBM22-201	ENSG00000086589.11_2	RBM22	chr5:150070356-150080669	-	protein_coding
ENST00000199936.8_1	HSD17B2-201	ENSG00000086696.10_3	HSD17B2	chr16:82068837-82132139	+	protein_coding
ENST00000199940.10_2	MAP2-201	ENSG00000078018.19_3	MAP2	chr2:210288782-210595242	+	protein_coding
ENST00000200135.7_1	ZW10-201	ENSG00000086827.8_3	ZW10	chr11:113603909-113644533	-	protein_coding
ENST00000200181.7_1	ITGB4-201	ENSG00000132470.13_2	ITGB4	chr17:73717516-73753899	+	protein_coding
ENST00000200453.5_2	PPP1R15A-201	ENSG00000087074.7_3	PPP1R15A	chr19:49375649-49379314	+	protein_coding
ENST00000200457.8_1	TRIP6-201	ENSG00000087077.13_3	TRIP6	chr7:100464760-100471076	+	protein_coding
ENST00000200557.10_2	ADAM11-201	ENSG00000073670.13_3	ADAM11	chr17:42836399-42859214	+	protein_coding
ENST00000200639.8_2	LAMP2-201	ENSG00000005893.15_2	LAMP2	chrX:119564681-119603161	-	protein_coding
ENST00000200652.3_1	SLC22A4-201	ENSG00000197208.5_2	SLC22A4	chr5:131630136-131679899	+	protein_coding
ENST00000200676.7_1	CETP-201	ENSG00000087237.10_2	CETP	chr16:56995762-57017757	+	protein_coding
ENST00000201647.10_1	EPS8L1-201	ENSG00000131037.14_2	EPS8L1	chr19:55587269-55599290	+	protein_coding
ENST00000201961.6_4	NOL4L-201	ENSG00000197183.14_4	NOL4L	chr20:31073340-31172630	-	protein_coding
ENST00000202017.5_1	PDRG1-201	ENSG00000088356.5_2	PDRG1	chr20:30532145-30539895	-	protein_coding
ENST00000202556.13_1	PPP1R13B-201	ENSG00000088808.16_2	PPP1R13B	chr14:104200089-104313927	-	protein_coding
ENST00000202773.13_1	RPL6-201	ENSG00000089009.15_2	RPL6	chr12:112843003-112847445	-	protein_coding
ENST00000202816.5_1	ESF1-201	ENSG00000089048.14_2	ESF1	chr20:13694969-13765532	-	protein_coding
ENST00000202834.11_1	TMEM230-201	ENSG00000089063.14_2	TMEM230	chr20:5080486-5093749	-	protein_coding
ENST00000202917.9_1	OAS1-201	ENSG00000089127.12_3	OAS1	chr12:113344582-113357708	+	protein_coding
ENST00000203407.5_1	UQCRC1-201	ENSG00000010256.10_2	UQCRC1	chr3:48636436-48647470	-	protein_coding
ENST00000203556.8_1	GMIP-201	ENSG00000089639.10_2	GMIP	chr19:19740285-19754476	-	protein_coding
ENST00000203630.9_3	MLF2-201	ENSG00000089693.10_3	MLF2	chr12:6857162-6862721	-	protein_coding
ENST00000204005.13_1	LTBP4-201	ENSG00000090006.17_2	LTBP4	chr19:41099072-41135723	+	protein_coding
ENST00000204549.8_3	PDCD7-201	ENSG00000090470.14_3	PDCD7	chr15:65409717-65426174	-	protein_coding
ENST00000204566.6_1	SPG21-201	ENSG00000090487.10_2	SPG21	chr15:65255362-65282274	-	protein_coding
ENST00000204637.6_1	FLT3LG-201	ENSG00000090554.12_3	FLT3LG	chr19:49977493-49989488	+	protein_coding
ENST00000204679.8_1	GNPTG-201	ENSG00000090581.9_3	GNPTG	chr16:1401924-1414114	+	protein_coding
ENST00000204726.7_4	GOLGA3-201	ENSG00000090615.14_4	GOLGA3	chr12:133345495-133405288	-	protein_coding
ENST00000204961.4_1	EFNB1-201	ENSG00000090776.5_2	EFNB1	chrX:68048840-68061990	+	protein_coding
ENST00000205061.9_2	GLG1-201	ENSG00000090863.11_3	GLG1	chr16:74481325-74641012	-	protein_coding
ENST00000205194.4_1	NAT14-201	ENSG00000090971.4_2	NAT14	chr19:55996371-55998935	+	protein_coding
ENST00000205214.10_1	AASDH-201	ENSG00000157426.13_2	AASDH	chr4:57204456-57253666	-	protein_coding
ENST00000205402.9_1	DLD-201	ENSG00000091140.13_2	DLD	chr7:107531415-107561648	+	protein_coding
ENST00000205636.3_1	CMTM6-201	ENSG00000091317.7_2	CMTM6	chr3:32522804-32544900	-	protein_coding
ENST00000205890.9_1	MYO15A-201	ENSG00000091536.16_3	MYO15A	chr17:18012020-18083116	+	protein_coding
ENST00000206020.7_1	SPAG7-201	ENSG00000091640.7_2	SPAG7	chr17:4862523-4871167	-	protein_coding
ENST00000206451.10_1	PSME1-201	ENSG00000092010.14_2	PSME1	chr14:24605367-24608176	+	protein_coding
ENST00000206474.11_3	HAUS4-201	ENSG00000092036.18_4	HAUS4	chr14:23415437-23426363	-	protein_coding
ENST00000206513.5_1	CEBPE-201	ENSG00000092067.5_2	CEBPE	chr14:23586513-23588825	-	protein_coding
ENST00000206542.8_1	OSGEP-201	ENSG00000092094.10_2	OSGEP	chr14:20914827-20923264	-	protein_coding
ENST00000206595.10_1	G2E3-201	ENSG00000092140.14_3	G2E3	chr14:31028329-31089269	+	protein_coding
ENST00000207549.8_1	UNC13D-201	ENSG00000092929.11_3	UNC13D	chr17:73823306-73840798	-	protein_coding
ENST00000209718.7_1	KRT23-201	ENSG00000108244.16_3	KRT23	chr17:39078948-39093672	-	protein_coding
ENST00000209875.8_1	CBX5-201	ENSG00000094916.15_4	CBX5	chr12:54624724-54673886	-	protein_coding
ENST00000209884.4_1	KLHL20-201	ENSG00000076321.10_3	KLHL20	chr1:173684123-173755840	+	protein_coding
ENST00000210060.11_1	DHPS-201	ENSG00000095059.15_2	DHPS	chr19:12786535-12792716	-	protein_coding
ENST00000210313.7_1	PSMD5-201	ENSG00000095261.13_1	PSMD5	chr9:123578331-123605262	-	protein_coding
ENST00000210444.5_1	NANS-201	ENSG00000095380.10_2	NANS	chr9:100819021-100845357	+	protein_coding
ENST00000211287.8_1	MAPK13-201	ENSG00000156711.16_2	MAPK13	chr6:36098098-36107842	+	protein_coding
ENST00000211379.9_1	BAG6-234	ENSG00000204463.12_3	BAG6	chr6:31606805-31620482	-	protein_coding
ENST00000211921.11_2	LST1-201	ENSG00000204482.10_3	LST1	chr6:31554625-31556587	+	protein_coding
ENST00000211936.10_1	ZNF184-201	ENSG00000096654.15_2	ZNF184	chr6:27418522-27440897	-	protein_coding
ENST00000211998.9_2	VCL-201	ENSG00000035403.17_3	VCL	chr10:75757872-75879918	+	protein_coding
ENST00000212015.10_1	SIRT1-201	ENSG00000096717.11_2	SIRT1	chr10:69644427-69678147	+	protein_coding
ENST00000212355.8_1	TGFBR3-201	ENSG00000069702.10_2	TGFBR3	chr1:92145902-92351836	-	protein_coding
ENST00000215071.8_1	PSMD8-201	ENSG00000099341.11_3	PSMD8	chr19:38865176-38874464	+	protein_coding
ENST00000215115.4_3	BCL7C-201	ENSG00000099385.11_4	BCL7C	chr16:30899116-30906281	-	protein_coding
ENST00000215368.3_1	EFNA2-201	ENSG00000099617.3_2	EFNA2	chr19:1286153-1300236	+	protein_coding
ENST00000215375.6_1	ATP5D-201	ENSG00000099624.7_3	ATP5D	chr19:1241749-1244825	+	protein_coding
ENST00000215530.6_2	FGF22-201	ENSG00000070388.11_2	FGF22	chr19:639895-644371	+	protein_coding
ENST00000215555.6_1	MARCH2-201	ENSG00000099785.10_2	MARCH2	chr19:8478187-8503895	+	protein_coding
ENST00000215565.2_1	NDUFB7-201	ENSG00000099795.6_2	NDUFB7	chr19:14676890-14682874	-	protein_coding
ENST00000215567.9_1	TECR-201	ENSG00000099797.13_3	TECR	chr19:14640372-14676790	+	protein_coding
ENST00000215570.7_1	TIMM13-201	ENSG00000099800.7_3	TIMM13	chr19:2425622-2427892	-	protein_coding
ENST00000215574.8_1	CDC34-201	ENSG00000099804.8_2	CDC34	chr19:531712-542092	+	protein_coding
ENST00000215631.8_1	GADD45B-201	ENSG00000099860.8_3	GADD45B	chr19:2476125-2478257	+	protein_coding
ENST00000215730.11_1	SNAP29-201	ENSG00000099940.11_3	SNAP29	chr22:21213271-21245506	+	protein_coding
ENST00000215739.12_1	LZTR1-201	ENSG00000099949.18_3	LZTR1	chr22:21336302-21353327	+	protein_coding
ENST00000215754.7_1	MIF-201	ENSG00000240972.1_3	MIF	chr22:24236191-24237413	+	protein_coding
ENST00000215770.5_1	DDTL-201	ENSG00000099974.7_3	DDTL	chr22:24309089-24314721	+	protein_coding
ENST00000215781.2_2	OSM-201	ENSG00000099985.3_2	OSM	chr22:30658818-30662829	-	protein_coding
ENST00000215790.11_1	TBC1D10A-201	ENSG00000099992.15_3	TBC1D10A	chr22:30687979-30723035	-	protein_coding
ENST00000215793.12_1	SF3A1-201	ENSG00000099995.18_3	SF3A1	chr22:30727977-30752936	-	protein_coding
ENST00000215794.7_1	USP18-201	ENSG00000184979.9_2	USP18	chr22:18632666-18660164	+	protein_coding
ENST00000215829.7_1	SNRPD3-201	ENSG00000100028.11_3	SNRPD3	chr22:24951471-24968740	+	protein_coding
ENST00000215832.10_1	MAPK1-201	ENSG00000100030.14_2	MAPK1	chr22:22108789-22221919	-	protein_coding
ENST00000215882.9_1	SLC25A1-201	ENSG00000100075.9_2	SLC25A1	chr22:19163088-19166343	-	protein_coding
ENST00000215886.5_1	LGALS2-201	ENSG00000100079.6_2	LGALS2	chr22:37966253-37976087	-	protein_coding
ENST00000215904.6_1	PDXP-201	ENSG00000241360.1_3	PDXP	chr22:38054734-38062941	+	protein_coding
ENST00000215909.9_1	LGALS1-201	ENSG00000100097.11_2	LGALS1	chr22:38071615-38075813	+	protein_coding
ENST00000215912.9_3	PIK3IP1-201	ENSG00000100100.12_3	PIK3IP1	chr22:31677579-31688514	-	protein_coding
ENST00000215917.11_2	SRRD-201	ENSG00000100104.13_3	SRRD	chr22:26879843-26890624	+	protein_coding
ENST00000215919.3_1	PATZ1-201	ENSG00000100105.17_3	PATZ1	chr22:31736663-31741762	-	protein_coding
ENST00000215941.8_1	ANKRD54-201	ENSG00000100124.14_3	ANKRD54	chr22:38226862-38240438	-	protein_coding
ENST00000215956.9_1	SNU13-201	ENSG00000100138.13_2	SNU13	chr22:42069958-42078626	-	protein_coding
ENST00000215957.10_1	MICALL1-201	ENSG00000100139.13_3	MICALL1	chr22:38302304-38338829	+	protein_coding
ENST00000216024.6_1	DMC1-201	ENSG00000100206.9_2	DMC1	chr22:38914954-38966291	-	protein_coding
ENST00000216027.7_1	HSCB-201	ENSG00000100209.9_2	HSCB	chr22:29138019-29153498	+	protein_coding
ENST00000216034.5_1	TOMM22-201	ENSG00000100216.5_2	TOMM22	chr22:39077953-39081426	+	protein_coding
ENST00000216037.10_3	XBP1-201	ENSG00000100219.16_4	XBP1	chr22:29190543-29196585	-	protein_coding
ENST00000216038.5_1	RTCB-201	ENSG00000100220.11_2	RTCB	chr22:32783569-32808242	-	protein_coding
ENST00000216039.9_1	JOSD1-201	ENSG00000100221.10_3	JOSD1	chr22:39081548-39096672	-	protein_coding
ENST00000216044.9_1	GTPBP1-201	ENSG00000100226.15_3	GTPBP1	chr22:39101728-39129592	+	protein_coding
ENST00000216061.9_1	PPP6R2-201	ENSG00000100239.15_3	PPP6R2	chr22:50810501-50882820	+	protein_coding
ENST00000216068.8_1	DNAL4-201	ENSG00000100246.12_3	DNAL4	chr22:39174513-39190178	-	protein_coding
ENST00000216080.5_3	LMF2-201	ENSG00000100258.17_3	LMF2	chr22:50941380-50946113	-	protein_coding
ENST00000216085.11_2	RHBDD3-201	ENSG00000100263.13_3	RHBDD3	chr22:29655841-29663967	-	protein_coding
ENST00000216099.12_2	APOBEC3D-201	ENSG00000243811.8_2	APOBEC3D	chr22:39417118-39429281	+	protein_coding
ENST00000216117.8_1	HMOX1-201	ENSG00000100292.16_2	HMOX1	chr22:35776828-35790207	+	protein_coding
ENST00000216121.11_1	NIPSNAP1-201	ENSG00000184117.11_3	NIPSNAP1	chr22:29950797-29977326	-	protein_coding
ENST00000216122.8_1	MCM5-201	ENSG00000100297.15_3	MCM5	chr22:35796056-35821423	+	protein_coding
ENST00000216124.9_1	ARSA-201	ENSG00000100299.17_2	ARSA	chr22:51063446-51066600	-	protein_coding
ENST00000216129.6_1	TTLL12-201	ENSG00000100304.12_2	TTLL12	chr22:43562628-43583139	-	protein_coding
ENST00000216133.9_1	CBX7-201	ENSG00000100307.12_3	CBX7	chr22:39526777-39548655	-	protein_coding
ENST00000216144.3_1	CABP7-201	ENSG00000100314.3_2	CABP7	chr22:30116073-30127828	+	protein_coding
ENST00000216146.8_1	RPL3-201	ENSG00000100316.15_2	RPL3	chr22:39708889-39715776	-	protein_coding
ENST00000216160.10_1	TAB1-201	ENSG00000100324.13_2	TAB1	chr22:39795746-39827887	+	protein_coding
ENST00000216181.9_1	MYH9-201	ENSG00000100345.20_2	MYH9	chr22:36677327-36784063	-	protein_coding
ENST00000216185.6_1	TXN2-201	ENSG00000100348.9_2	TXN2	chr22:36863083-36878077	-	protein_coding
ENST00000216190.12_1	EIF3D-201	ENSG00000100353.17_2	EIF3D	chr22:36906897-36925483	-	protein_coding
ENST00000216200.9_2	PVALB-201	ENSG00000100362.12_2	PVALB	chr22:37196728-37215523	-	protein_coding
ENST00000216218.7_1	ST13-201	ENSG00000100380.13_3	ST13	chr22:41220539-41253026	-	protein_coding
ENST00000216223.9_1	IL2RB-201	ENSG00000100385.13_2	IL2RB	chr22:37521878-37546030	-	protein_coding
ENST00000216225.8_1	RBX1-201	ENSG00000100387.8_2	RBX1	chr22:41347363-41369313	+	protein_coding
ENST00000216241.13_3	CHADL-201	ENSG00000100399.15_3	CHADL	chr22:41625517-41636938	-	protein_coding
ENST00000216252.3_1	PHF5A-201	ENSG00000100410.7_2	PHF5A	chr22:41855721-41864729	-	protein_coding
ENST00000216254.8_1	ACO2-201	ENSG00000100412.15_2	ACO2	chr22:41865129-41924993	+	protein_coding
ENST00000216259.7_1	PMM1-201	ENSG00000100417.11_2	PMM1	chr22:41972898-41985894	-	protein_coding
ENST00000216264.12_1	CERK-201	ENSG00000100422.13_2	CERK	chr22:47080308-47134158	-	protein_coding
ENST00000216267.12_1	BRD1-201	ENSG00000100425.18_2	BRD1	chr22:50166931-50218452	-	protein_coding
ENST00000216268.5_1	ZBED4-201	ENSG00000100426.6_3	ZBED4	chr22:50247490-50283726	+	protein_coding
ENST00000216271.9_1	HDAC10-201	ENSG00000100429.17_3	HDAC10	chr22:50683612-50689814	-	protein_coding
ENST00000216274.9_1	RIPK3-201	ENSG00000129465.15_3	RIPK3	chr14:24805227-24809251	-	protein_coding
ENST00000216277.12_1	PAPOLA-201	ENSG00000090060.17_2	PAPOLA	chr14:96968710-97033448	+	protein_coding
ENST00000216281.12_1	HSP90AA1-201	ENSG00000080824.18_2	HSP90AA1	chr14:102547075-102553528	-	protein_coding
ENST00000216288.11_1	MARK3-201	ENSG00000075413.17_4	MARK3	chr14:103852197-103970163	+	protein_coding
ENST00000216294.4_1	SNAPC1-201	ENSG00000023608.4_3	SNAPC1	chr14:62229075-62263146	+	protein_coding
ENST00000216297.6_1	SUPT16H-201	ENSG00000092201.9_2	SUPT16H	chr14:21819631-21852425	-	protein_coding
ENST00000216330.7_1	FKBP3-201	ENSG00000100442.10_2	FKBP3	chr14:45584803-45604522	-	protein_coding
ENST00000216336.2_1	CTSG-201	ENSG00000100448.3_2	CTSG	chr14:25042762-25045466	-	protein_coding
ENST00000216338.8_1	GZMH-201	ENSG00000100450.12_2	GZMH	chr14:25075686-25078864	-	protein_coding
ENST00000216341.8_1	GZMB-201	ENSG00000100453.12_2	GZMB	chr14:25100160-25103473	-	protein_coding
ENST00000216367.9_1	POLE2-201	ENSG00000100479.12_2	POLE2	chr14:50110278-50155021	-	protein_coding
ENST00000216373.9_1	SOS2-201	ENSG00000100485.11_2	SOS2	chr14:50583838-50698276	-	protein_coding
ENST00000216392.7_1	PYGL-201	ENSG00000100504.16_2	PYGL	chr14:51371939-51411454	-	protein_coding
ENST00000216410.7_1	GNPNAT1-201	ENSG00000100522.8_2	GNPNAT1	chr14:53241912-53258319	-	protein_coding
ENST00000216416.8_1	CNIH1-201	ENSG00000100528.11_2	CNIH1	chr14:54890278-54908149	-	protein_coding
ENST00000216420.11_1	CGRRF1-201	ENSG00000100532.11_2	CGRRF1	chr14:54976546-55006027	+	protein_coding
ENST00000216442.11_1	ATP6V1D-201	ENSG00000100554.11_3	ATP6V1D	chr14:67804788-67826966	-	protein_coding
ENST00000216455.8_1	PSMA3-201	ENSG00000100567.12_3	PSMA3	chr14:58711549-58738725	+	protein_coding
ENST00000216468.7_1	TMED8-201	ENSG00000100580.7_2	TMED8	chr14:77801364-77843452	-	protein_coding
ENST00000216479.7_1	AHSA1-201	ENSG00000100591.7_3	AHSA1	chr14:77924373-77935817	+	protein_coding
ENST00000216484.6_1	SPTLC2-201	ENSG00000100596.6_3	SPTLC2	chr14:77972340-78083116	-	protein_coding
ENST00000216487.11_1	RIN3-201	ENSG00000100599.15_4	RIN3	chr14:92980118-93155339	+	protein_coding
ENST00000216492.9_4	CHGA-201	ENSG00000100604.12_4	CHGA	chr14:93389425-93401638	+	protein_coding
ENST00000216500.9_1	DHRS7-201	ENSG00000100612.13_2	DHRS7	chr14:60610838-60636574	-	protein_coding
ENST00000216513.4_1	SIX4-201	ENSG00000100625.8_3	SIX4	chr14:61176246-61190852	-	protein_coding
ENST00000216554.7_1	EIF5-201	ENSG00000100664.10_3	EIF5	chr14:103800339-103811362	+	protein_coding
ENST00000216639.7_1	VRK1-201	ENSG00000100749.7_3	VRK1	chr14:97263641-97347950	+	protein_coding
ENST00000216714.7_1	APEX1-201	ENSG00000100823.11_3	APEX1	chr14:20923354-20925926	+	protein_coding
ENST00000216727.8_1	PABPN1-201	ENSG00000100836.10_3	PABPN1	chr14:23790498-23795394	+	protein_coding
ENST00000216780.8_1	PCK2-201	ENSG00000100889.11_2	PCK2	chr14:24563347-24573339	+	protein_coding
ENST00000216797.9_1	NFKBIA-201	ENSG00000100906.10_2	NFKBIA	chr14:35870717-35873952	-	protein_coding
ENST00000216802.9_1	PSME2-201	ENSG00000100911.15_3	PSME2	chr14:24612574-24616430	-	protein_coding
ENST00000216832.8_1	PNN-201	ENSG00000100941.8_2	PNN	chr14:39644417-39652422	+	protein_coding
ENST00000216862.7_1	CYP24A1-201	ENSG00000019186.9_2	CYP24A1	chr20:52769988-52790512	-	protein_coding
ENST00000216877.10_1	PTPRA-201	ENSG00000132670.20_3	PTPRA	chr20:2854135-3019722	+	protein_coding
ENST00000216879.8_1	NSFL1C-201	ENSG00000088833.17_3	NSFL1C	chr20:1422807-1448337	-	protein_coding
ENST00000216923.4_1	ZFP64-201	ENSG00000020256.19_3	ZFP64	chr20:50767817-50808525	-	protein_coding
ENST00000216951.6_1	GSS-201	ENSG00000100983.9_2	GSS	chr20:33516233-33543620	-	protein_coding
ENST00000216962.8_1	PYGB-201	ENSG00000100994.11_3	PYGB	chr20:25228705-25278650	+	protein_coding
ENST00000217026.4_1	MYBL2-201	ENSG00000101057.15_2	MYBL2	chr20:42295797-42345136	+	protein_coding
ENST00000217074.8_1	PABPC1L-202	ENSG00000101104.12_2	PABPC1L	chr20:43538703-43559367	+	protein_coding
ENST00000217109.8_1	CSTF1-201	ENSG00000101138.11_3	CSTF1	chr20:54967450-54981425	+	protein_coding
ENST00000217121.9_1	TPD52L2-201	ENSG00000101150.17_3	TPD52L2	chr20:62496647-62522898	+	protein_coding
ENST00000217131.5_1	CTSZ-201	ENSG00000101160.13_2	CTSZ	chr20:57570240-57582302	-	protein_coding
ENST00000217133.1_1	TUBB1-201	ENSG00000101162.3_2	TUBB1	chr20:57594309-57601709	+	protein_coding
ENST00000217173.6_1	UBOX5-201	ENSG00000185019.16_3	UBOX5	chr20:3088219-3140842	-	protein_coding
ENST00000217182.4_1	EEF1A2-201	ENSG00000101210.10_2	EEF1A2	chr20:62119366-62130668	-	protein_coding
ENST00000217188.1_1	SRMS-201	ENSG00000125508.3_2	SRMS	chr20:62172163-62178857	-	protein_coding
ENST00000217233.7_1	TRIB3-201	ENSG00000101255.10_3	TRIB3	chr20:361261-378203	+	protein_coding
ENST00000217244.7_1	CSNK2A1-201	ENSG00000101266.17_3	CSNK2A1	chr20:461741-524465	-	protein_coding
ENST00000217315.9_1	TM9SF4-201	ENSG00000101337.15_3	TM9SF4	chr20:30697539-30755061	+	protein_coding
ENST00000217320.7_1	TLDC2-201	ENSG00000101342.9_2	TLDC2	chr20:35504534-35522638	+	protein_coding
ENST00000217381.2_1	SNTA1-201	ENSG00000101400.5_2	SNTA1	chr20:31995761-32031698	-	protein_coding
ENST00000217402.2_1	CHMP4B-201	ENSG00000101421.3_2	CHMP4B	chr20:32399110-32442172	+	protein_coding
ENST00000217420.1_1	SLC32A1-201	ENSG00000101438.3_2	SLC32A1	chr20:37353105-37358015	+	protein_coding
ENST00000217426.6_1	AHCY-201	ENSG00000101444.12_3	AHCY	chr20:32868074-32891154	-	protein_coding
ENST00000217446.7_2	PIGU-201	ENSG00000101464.10_3	PIGU	chr20:33148346-33264889	-	protein_coding
ENST00000217456.2_1	APMAP-201	ENSG00000101474.11_3	APMAP	chr20:24943561-24973615	-	protein_coding
ENST00000217515.10_2	TXNL1-201	ENSG00000091164.12_3	TXNL1	chr18:54264439-54305876	-	protein_coding
ENST00000217652.7_1	MYL12A-201	ENSG00000101608.12_3	MYL12A	chr18:3247528-3256234	+	protein_coding
ENST00000217740.3_1	RNF125-201	ENSG00000101695.8_3	RNF125	chr18:29598335-29653176	+	protein_coding
ENST00000217901.9_1	IDH3G-201	ENSG00000067829.18_3	IDH3G	chrX:153051221-153059978	-	protein_coding
ENST00000217909.7_1	SLC25A43-201	ENSG00000077713.18_3	SLC25A43	chrX:118533023-118588441	+	protein_coding
ENST00000217958.7_1	PSMD10-201	ENSG00000101843.18_2	PSMD10	chrX:107327437-107334848	-	protein_coding
ENST00000217961.4_1	STS-201	ENSG00000101846.6_2	STS	chrX:7137497-7272851	+	protein_coding
ENST00000217964.11_1	TBL1X-201	ENSG00000101849.15_4	TBL1X	chrX:9433048-9687783	+	protein_coding
ENST00000217971.7_1	PGRMC1-201	ENSG00000101856.9_2	PGRMC1	chrX:118370216-118378429	+	protein_coding
ENST00000218004.5_1	NXT2-201	ENSG00000101888.11_2	NXT2	chrX:108779010-108787913	+	protein_coding
ENST00000218032.6_1	TLR8-201	ENSG00000101916.11_2	TLR8	chrX:12924739-12941288	+	protein_coding
ENST00000218056.9_1	WDR13-201	ENSG00000101940.17_2	WDR13	chrX:48455880-48463581	+	protein_coding
ENST00000218089.13_1	STAG2-201	ENSG00000101972.18_3	STAG2	chrX:123094369-123235348	+	protein_coding
ENST00000218104.5_1	ABCD1-201	ENSG00000101986.11_2	ABCD1	chrX:152990323-153010216	+	protein_coding
ENST00000218200.12_1	FMR1-201	ENSG00000102081.13_3	FMR1	chrX:146993469-147032632	+	protein_coding
ENST00000218230.5_1	PCSK1N-201	ENSG00000102109.8_2	PCSK1N	chrX:48689504-48694035	-	protein_coding
ENST00000218340.3_1	RP2-201	ENSG00000102218.5_2	RP2	chrX:46696375-46741793	+	protein_coding
ENST00000218364.4_1	HTATSF1-201	ENSG00000102241.11_2	HTATSF1	chrX:135579670-135594505	+	protein_coding
ENST00000218388.8_1	TIMP1-201	ENSG00000102265.11_2	TIMP1	chrX:47441712-47446188	+	protein_coding
ENST00000218439.8_1	MAGED2-201	ENSG00000102316.16_2	MAGED2	chrX:54834771-54842127	+	protein_coding
ENST00000218516.3_1	GLA-201	ENSG00000102393.9_2	GLA	chrX:100652791-100662913	-	protein_coding
ENST00000218721.1_1	MLNR-201	ENSG00000102539.5_2	MLNR	chr13:49794474-49796513	+	protein_coding
ENST00000218789.9_3	ARHGEF7-201	ENSG00000102606.17_3	ARHGEF7	chr13:111806061-111958078	+	protein_coding
ENST00000218981.5_1	DHRS12-201	ENSG00000102796.10_2	DHRS12	chr13:52342131-52378293	-	protein_coding
ENST00000219022.2_1	OLFM4-201	ENSG00000102837.6_2	OLFM4	chr13:53602894-53626192	+	protein_coding
ENST00000219066.5_2	NTHL1-201	ENSG00000065057.7_3	NTHL1	chr16:2089816-2097867	-	protein_coding
ENST00000219069.5_1	ZNF263-201	ENSG00000006194.9_3	ZNF263	chr16:3332943-3341460	+	protein_coding
ENST00000219070.8_1	MMP2-201	ENSG00000087245.12_3	MMP2	chr16:55512883-55540603	+	protein_coding
ENST00000219139.7_1	C16orf70-201	ENSG00000125149.11_3	C16orf70	chr16:67143891-67182442	+	protein_coding
ENST00000219150.9_1	CORO1A-201	ENSG00000102879.15_3	CORO1A	chr16:30194743-30200397	+	protein_coding
ENST00000219168.8_1	LYRM1-201	ENSG00000102897.9_2	LYRM1	chr16:20912075-20936326	+	protein_coding
ENST00000219169.8_1	NUTF2-201	ENSG00000102898.11_3	NUTF2	chr16:67880635-67906470	+	protein_coding
ENST00000219197.10_1	CBLN1-201	ENSG00000102924.11_2	CBLN1	chr16:49311828-49315742	-	protein_coding
ENST00000219204.7_1	ARL2BP-201	ENSG00000102931.7_3	ARL2BP	chr16:57279010-57287547	+	protein_coding
ENST00000219252.9_1	POLR2C-201	ENSG00000102978.12_3	POLR2C	chr16:57496299-57505922	+	protein_coding
ENST00000219255.3_1	PARD6A-201	ENSG00000102981.9_2	PARD6A	chr16:67694862-67696677	+	protein_coding
ENST00000219271.3_1	MMP15-201	ENSG00000102996.4_2	MMP15	chr16:58059470-58080805	+	protein_coding
ENST00000219281.7_1	USB1-201	ENSG00000103005.11_2	USB1	chr16:58035277-58055522	+	protein_coding
ENST00000219302.7_1	NME3-201	ENSG00000103024.7_3	NME3	chr16:1820287-1821731	-	protein_coding
ENST00000219313.8_1	PSMD7-201	ENSG00000103035.10_2	PSMD7	chr16:74330673-74340186	+	protein_coding
ENST00000219334.9_1	SMPD3-201	ENSG00000103056.11_3	SMPD3	chr16:68392228-68482591	-	protein_coding
ENST00000219439.8_1	HSDL1-201	ENSG00000103160.11_3	HSDL1	chr16:84155886-84178793	-	protein_coding
ENST00000219473.11_2	USP10-201	ENSG00000103194.15_2	USP10	chr16:84733584-84813187	+	protein_coding
ENST00000219476.7_1	TSC2-201	ENSG00000103197.16_3	TSC2	chr16:2097466-2138713	+	protein_coding
ENST00000219479.6_2	NME4-201	ENSG00000103202.12_3	NME4	chr16:447209-450759	+	protein_coding
ENST00000219548.8_1	STUB1-201	ENSG00000103266.10_2	STUB1	chr16:730276-732799	+	protein_coding
ENST00000219611.6_1	CAPN15-201	ENSG00000103326.11_3	CAPN15	chr16:577856-604636	+	protein_coding
ENST00000219689.11_1	USP31-201	ENSG00000103404.14_3	USP31	chr16:23072727-23160591	-	protein_coding
ENST00000219782.10_2	MAZ-201	ENSG00000103495.13_3	MAZ	chr16:29817917-29822485	+	protein_coding
ENST00000219789.10_1	CDIPT-201	ENSG00000103502.13_2	CDIPT	chr16:29869678-29875057	-	protein_coding
ENST00000219794.10_1	BCKDK-201	ENSG00000103507.13_3	BCKDK	chr16:31119615-31124112	+	protein_coding
ENST00000219837.11_3	KNOP1-201	ENSG00000103550.13_4	KNOP1	chr16:19713256-19729556	-	protein_coding
ENST00000219905.11_1	MGA-201	ENSG00000174197.16_1	MGA	chr15:41952610-42062141	+	protein_coding
ENST00000219919.8_1	AQP9-201	ENSG00000103569.9_3	AQP9	chr15:58430395-58478110	+	protein_coding
ENST00000220003.13_1	CSK-201	ENSG00000103653.16_3	CSK	chr15:75074398-75095539	+	protein_coding
ENST00000220166.9_1	CTSH-201	ENSG00000103811.15_2	CTSH	chr15:79213400-79237433	-	protein_coding
ENST00000220325.8_1	EHD4-201	ENSG00000103966.10_3	EHD4	chr15:42188137-42264776	-	protein_coding
ENST00000220429.12_1	GABPB1-201	ENSG00000104064.16_2	GABPB1	chr15:50569460-50647350	-	protein_coding
ENST00000220478.7_1	SCG3-201	ENSG00000104112.8_3	SCG3	chr15:51973550-52013228	+	protein_coding
ENST00000220496.8_1	DNAJC17-201	ENSG00000104129.9_2	DNAJC17	chr15:41057353-41099675	-	protein_coding
ENST00000220509.9_1	VPS18-201	ENSG00000104142.10_2	VPS18	chr15:41186628-41196173	+	protein_coding
ENST00000220531.7_1	BLOC1S6-201	ENSG00000104164.10_3	BLOC1S6	chr15:45879321-45901909	+	protein_coding
ENST00000220562.8_1	EXTL3-201	ENSG00000012232.8_2	EXTL3	chr8:28558844-28611204	+	protein_coding
ENST00000220584.8_1	FDFT1-201	ENSG00000079459.12_3	FDFT1	chr8:11660120-11696818	+	protein_coding
ENST00000220592.9_2	AGO2-201	ENSG00000123908.11_3	AGO2	chr8:141530255-141645718	-	protein_coding
ENST00000220597.4_1	PAG1-201	ENSG00000076641.4_2	PAG1	chr8:81880045-82024303	-	protein_coding
ENST00000220659.10_1	BRF2-201	ENSG00000104221.12_2	BRF2	chr8:37700786-37707422	-	protein_coding
ENST00000220669.9_3	ZFAND1-201	ENSG00000104231.10_3	ZFAND1	chr8:82613958-82633535	-	protein_coding
ENST00000220751.4_1	RIPK2-201	ENSG00000104312.7_2	RIPK2	chr8:90769975-90803291	+	protein_coding
ENST00000220763.9_1	CPQ-201	ENSG00000104324.15_3	CPQ	chr8:97657455-98155729	+	protein_coding
ENST00000220764.6_1	DECR1-201	ENSG00000104325.6_3	DECR1	chr8:91013633-91064236	+	protein_coding
ENST00000220772.7_1	SFRP1-201	ENSG00000104332.11_3	SFRP1	chr8:41119477-41167016	-	protein_coding
ENST00000220809.8_1	PLAT-201	ENSG00000104368.17_3	PLAT	chr8:42032751-42065242	-	protein_coding
ENST00000220822.11_1	GDAP1-201	ENSG00000104381.12_2	GDAP1	chr8:75262617-75279111	+	protein_coding
ENST00000220847.8_1	PHF20L1-201	ENSG00000129292.20_3	PHF20L1	chr8:133787604-133858168	+	protein_coding
ENST00000220849.9_1	EIF3E-201	ENSG00000104408.9_3	EIF3E	chr8:109213972-109260994	-	protein_coding
ENST00000220853.7_1	EMC2-201	ENSG00000104412.7_3	EMC2	chr8:109455853-109499141	+	protein_coding
ENST00000220913.9_1	CHRAC1-201	ENSG00000104472.9_3	CHRAC1	chr8:141521397-141527236	+	protein_coding
ENST00000220959.8_1	UBR5-201	ENSG00000104517.12_3	UBR5	chr8:103265964-103424917	-	protein_coding
ENST00000220966.10_1	PYCR3-201	ENSG00000104524.13_4	PYCR3	chr8:144686083-144691784	-	protein_coding
ENST00000221086.7_1	MTMR9-201	ENSG00000104643.9_2	MTMR9	chr8:11141925-11185655	+	protein_coding
ENST00000221114.7_1	DCTN6-201	ENSG00000104671.7_3	DCTN6	chr8:30013813-30041156	+	protein_coding
ENST00000221130.9_2	GSR-201	ENSG00000104687.12_3	GSR	chr8:30535578-30585443	-	protein_coding
ENST00000221132.7_1	TNFRSF10A-201	ENSG00000104689.9_2	TNFRSF10A	chr8:23047965-23082639	-	protein_coding
ENST00000221138.8_1	PPP2CB-201	ENSG00000104695.12_2	PPP2CB	chr8:30643126-30670388	-	protein_coding
ENST00000221166.9_1	NEFM-201	ENSG00000104722.13_2	NEFM	chr8:24770525-24776606	+	protein_coding
ENST00000221200.8_1	KCTD9-201	ENSG00000104756.15_2	KCTD9	chr8:25285363-25315983	-	protein_coding
ENST00000221232.9_1	CNOT3-201	ENSG00000088038.17_3	CNOT3	chr19:54641444-54659419	+	protein_coding
ENST00000221233.8_1	EXOSC5-201	ENSG00000077348.8_2	EXOSC5	chr19:41892279-41903384	-	protein_coding
ENST00000221249.10_2	PNPLA6-201	ENSG00000032444.15_3	PNPLA6	chr19:7598890-7626650	+	protein_coding
ENST00000221264.8_2	PLAUR-201	ENSG00000011422.11_3	PLAUR	chr19:44152732-44174699	-	protein_coding
ENST00000221265.7_1	PAF1-201	ENSG00000006712.14_3	PAF1	chr19:39876492-39881835	-	protein_coding
ENST00000221283.9_1	STXBP2-201	ENSG00000076944.15_3	STXBP2	chr19:7702005-7712759	+	protein_coding
ENST00000221307.12_1	CYP4F3-201	ENSG00000186529.15_3	CYP4F3	chr19:15751710-15773635	+	protein_coding
ENST00000221355.10_1	ZNF780B-201	ENSG00000128000.15_3	ZNF780B	chr19:40539486-40562112	-	protein_coding
ENST00000221418.8_1	ECH1-201	ENSG00000104823.8_3	ECH1	chr19:39306062-39322645	-	protein_coding
ENST00000221419.9_1	HNRNPL-201	ENSG00000104824.16_3	HNRNPL	chr19:39327028-39340973	-	protein_coding
ENST00000221444.1_1	KCNA7-201	ENSG00000104848.1_2	KCNA7	chr19:49570675-49576198	-	protein_coding
ENST00000221448.9_1	SNRNP70-201	ENSG00000104852.14_2	SNRNP70	chr19:49588708-49611820	+	protein_coding
ENST00000221452.12_1	RELB-201	ENSG00000104856.13_2	RELB	chr19:45504688-45541452	+	protein_coding
ENST00000221455.7_2	CLASRP-201	ENSG00000104859.14_3	CLASRP	chr19:45542298-45574214	+	protein_coding
ENST00000221462.8_1	PPP1R37-201	ENSG00000104866.10_3	PPP1R37	chr19:45596220-45650543	+	protein_coding
ENST00000221466.9_1	FCGRT-201	ENSG00000104870.12_3	FCGRT	chr19:50015536-50029590	+	protein_coding
ENST00000221486.4_1	RNASEH2A-201	ENSG00000104889.5_2	RNASEH2A	chr19:12917394-12924451	+	protein_coding
ENST00000221494.9_3	SF3A2-201	ENSG00000104897.9_4	SF3A2	chr19:2236503-2248678	+	protein_coding
ENST00000221496.4_1	AMH-201	ENSG00000104899.7_3	AMH	chr19:2249310-2252072	+	protein_coding
ENST00000221515.5_1	RETN-201	ENSG00000104918.7_2	RETN	chr19:7733930-7735340	+	protein_coding
ENST00000221538.7_1	RSPH6A-201	ENSG00000104941.7_2	RSPH6A	chr19:46298968-46318577	-	protein_coding
ENST00000221554.12_1	CCDC130-201	ENSG00000104957.13_2	CCDC130	chr19:13858593-13874106	+	protein_coding
ENST00000221561.12_1	AES-201	ENSG00000104964.14_2	AES	chr19:3052908-3063105	-	protein_coding
ENST00000221566.6_1	SGTA-201	ENSG00000104969.9_2	SGTA	chr19:2754712-2783369	-	protein_coding
ENST00000221573.10_1	SNAPC2-201	ENSG00000104976.11_2	SNAPC2	chr19:7985201-7988135	+	protein_coding
ENST00000221665.4_1	FIZ1-201	ENSG00000179943.7_2	FIZ1	chr19:56102737-56110893	-	protein_coding
ENST00000221730.7_1	EPHX3-201	ENSG00000105131.7_2	EPHX3	chr19:15337730-15343243	-	protein_coding
ENST00000221801.7_2	FBL-201	ENSG00000105202.8_4	FBL	chr19:40325098-40337054	-	protein_coding
ENST00000221804.4_1	CLC-201	ENSG00000105205.6_2	CLC	chr19:40221890-40228668	-	protein_coding
ENST00000221855.7_1	TBCB-201	ENSG00000105254.11_3	TBCB	chr19:36605888-36616847	+	protein_coding
ENST00000221922.10_2	CCDC9-201	ENSG00000105321.12_2	CCDC9	chr19:47759716-47775210	+	protein_coding
ENST00000221930.5_1	TGFB1-201	ENSG00000105329.9_2	TGFB1	chr19:41836228-41859816	-	protein_coding
ENST00000221943.13_1	DMAC2-201	ENSG00000105341.18_3	DMAC2	chr19:41937224-41945810	-	protein_coding
ENST00000221954.6_1	CEACAM4-201	ENSG00000105352.10_2	CEACAM4	chr19:42125344-42133442	-	protein_coding
ENST00000221957.8_1	PLIN3-201	ENSG00000105355.8_3	PLIN3	chr19:4838353-4867780	-	protein_coding
ENST00000221972.7_2	CD79A-201	ENSG00000105369.9_3	CD79A	chr19:42381190-42385439	+	protein_coding
ENST00000221975.6_1	RPS19-201	ENSG00000105372.6_3	RPS19	chr19:42364327-42375484	+	protein_coding
ENST00000221978.9_1	NKG7-201	ENSG00000105374.9_2	NKG7	chr19:51874866-51875969	-	protein_coding
ENST00000221980.4_1	ICAM5-201	ENSG00000105376.4_3	ICAM5	chr19:10400657-10407454	+	protein_coding
ENST00000222005.6_1	CDC37-201	ENSG00000105401.8_3	CDC37	chr19:10501810-10514209	-	protein_coding
ENST00000222008.10_1	RABAC1-201	ENSG00000105404.10_2	RABAC1	chr19:42460833-42463542	-	protein_coding
ENST00000222120.7_1	RAB3D-201	ENSG00000105514.7_3	RAB3D	chr19:11432722-11450344	-	protein_coding
ENST00000222122.9_1	DBP-201	ENSG00000105516.10_2	DBP	chr19:49133287-49140695	-	protein_coding
ENST00000222139.10_1	EPOR-201	ENSG00000187266.13_3	EPOR	chr19:11487881-11494988	-	protein_coding
ENST00000222145.8_2	RASIP1-201	ENSG00000105538.9_3	RASIP1	chr19:49223844-49243978	-	protein_coding
ENST00000222214.9_1	GCDH-201	ENSG00000105607.12_3	GCDH	chr19:13001840-13010783	+	protein_coding
ENST00000222219.7_1	DNASE2-201	ENSG00000105612.8_2	DNASE2	chr19:12986025-12992282	-	protein_coding
ENST00000222224.3_1	LENG1-201	ENSG00000105617.3_2	LENG1	chr19:54658899-54663620	-	protein_coding
ENST00000222247.9_1	RPL18A-201	ENSG00000105640.12_2	RPL18A	chr19:17970685-17974125	+	protein_coding
ENST00000222286.8_1	GAPDHS-201	ENSG00000105679.8_2	GAPDHS	chr19:36024314-36036218	+	protein_coding
ENST00000222305.7_2	USF2-201	ENSG00000105698.15_2	USF2	chr19:35759968-35770715	+	protein_coding
ENST00000222308.8_3	FKBP8-201	ENSG00000105701.15_3	FKBP8	chr19:18642572-18654334	-	protein_coding
ENST00000222329.8_1	ERF-201	ENSG00000105722.9_3	ERF	chr19:42751724-42759309	-	protein_coding
ENST00000222330.7_1	GSK3A-201	ENSG00000105723.11_3	GSK3A	chr19:42734338-42746745	-	protein_coding
ENST00000222345.10_1	SIPA1L3-201	ENSG00000105738.10_3	SIPA1L3	chr19:38397868-38699012	+	protein_coding
ENST00000222374.2_1	CADM4-201	ENSG00000105767.2_2	CADM4	chr19:44126520-44143991	-	protein_coding
ENST00000222388.6_1	ABCF2-201	ENSG00000033050.7_2	ABCF2	chr7:150904923-150924252	-	protein_coding
ENST00000222402.7_1	UBE2D4-201	ENSG00000078967.12_3	UBE2D4	chr7:43966043-43995735	+	protein_coding
ENST00000222462.2_1	WNT16-201	ENSG00000002745.12_2	WNT16	chr7:120969057-120981158	+	protein_coding
ENST00000222511.10_1	GTPBP10-201	ENSG00000105793.15_3	GTPBP10	chr7:89975990-90020769	+	protein_coding
ENST00000222543.9_1	TFPI2-201	ENSG00000105825.11_2	TFPI2	chr7:93514709-93520303	-	protein_coding
ENST00000222547.7_1	BET1-201	ENSG00000105829.11_2	BET1	chr7:93622554-93633687	-	protein_coding
ENST00000222553.7_1	NAMPT-201	ENSG00000105835.11_3	NAMPT	chr7:105888731-105925638	-	protein_coding
ENST00000222567.5_1	TWISTNB-201	ENSG00000105849.5_2	TWISTNB	chr7:19735085-19748710	-	protein_coding
ENST00000222574.8_1	HBP1-201	ENSG00000105856.13_4	HBP1	chr7:106809460-106842974	+	protein_coding
ENST00000222584.7_1	SP4-201	ENSG00000105866.13_2	SP4	chr7:21467652-21554440	+	protein_coding
ENST00000222644.9_1	MPP6-201	ENSG00000105926.15_3	MPP6	chr7:24612965-24733812	+	protein_coding
ENST00000222673.5_1	OGDH-201	ENSG00000105953.14_2	OGDH	chr7:44646238-44748665	+	protein_coding
ENST00000222690.10_1	H2AFV-201	ENSG00000105968.18_2	H2AFV	chr7:44866390-44887676	-	protein_coding
ENST00000222693.4_1	CAV2-201	ENSG00000105971.14_2	CAV2	chr7:116139444-116148595	+	protein_coding
ENST00000222725.9_1	LFNG-201	ENSG00000106003.12_2	LFNG	chr7:2559476-2568063	+	protein_coding
ENST00000222747.7_1	TSPAN12-201	ENSG00000106025.8_2	TSPAN12	chr7:120427374-120498411	-	protein_coding
ENST00000222761.7_1	EVX1-201	ENSG00000106038.12_3	EVX1	chr7:27282319-27286044	+	protein_coding
ENST00000222792.10_1	CHN2-201	ENSG00000106069.21_3	CHN2	chr7:29234028-29553944	+	protein_coding
ENST00000222803.9_1	FKBP14-201	ENSG00000106080.10_2	FKBP14	chr7:30050203-30066300	-	protein_coding
ENST00000222812.7_1	STX1A-201	ENSG00000106089.11_2	STX1A	chr7:73113536-73133988	-	protein_coding
ENST00000222969.9_1	BUD31-201	ENSG00000106245.10_2	BUD31	chr7:99006601-99017231	+	protein_coding
ENST00000222990.7_1	SNX8-201	ENSG00000106266.10_3	SNX8	chr7:2291405-2354099	-	protein_coding
ENST00000223023.4_1	WASL-201	ENSG00000106299.7_2	WASL	chr7:123321989-123389121	-	protein_coding
ENST00000223029.7_1	AIMP2-201	ENSG00000106305.9_2	AIMP2	chr7:6048876-6063465	+	protein_coding
ENST00000223073.6_1	RBM28-201	ENSG00000106344.8_3	RBM28	chr7:127937738-127983962	-	protein_coding
ENST00000223095.4_1	SERPINE1-201	ENSG00000106366.8_2	SERPINE1	chr7:100770370-100782547	+	protein_coding
ENST00000223127.7_3	PLOD3-201	ENSG00000106397.11_3	PLOD3	chr7:100849258-100860954	-	protein_coding
ENST00000223129.8_1	RPA3-201	ENSG00000106399.11_2	RPA3	chr7:7676149-7758238	-	protein_coding
ENST00000223136.4_1	FIS1-201	ENSG00000214253.8_2	FIS1	chr7:100882893-100888366	-	protein_coding
ENST00000223145.9_1	GLCCI1-201	ENSG00000106415.12_3	GLCCI1	chr7:8008425-8128710	+	protein_coding
ENST00000223210.4_1	ZNF862-201	ENSG00000106479.10_3	ZNF862	chr7:149535456-149564568	+	protein_coding
ENST00000223215.8_1	MEST-201	ENSG00000106484.14_2	MEST	chr7:130131934-130146133	+	protein_coding
ENST00000223293.9_1	GIMAP2-201	ENSG00000106560.10_2	GIMAP2	chr7:150382788-150390729	+	protein_coding
ENST00000223321.8_1	PSMA2-201	ENSG00000106588.10_3	PSMA2	chr7:42956456-42971822	-	protein_coding
ENST00000223324.2_1	MRPL32-201	ENSG00000106591.3_3	MRPL32	chr7:42971799-42977456	+	protein_coding
ENST00000223357.7_1	AEBP1-201	ENSG00000106624.10_3	AEBP1	chr7:44143960-44154159	+	protein_coding
ENST00000223368.6_1	BCL7B-201	ENSG00000106635.7_2	BCL7B	chr7:72950686-72972332	-	protein_coding
ENST00000223369.2_1	YKT6-201	ENSG00000106636.7_3	YKT6	chr7:44240648-44253893	+	protein_coding
ENST00000223398.10_1	CLIP2-201	ENSG00000106665.15_2	CLIP2	chr7:73703805-73820273	+	protein_coding
ENST00000223459.10_1	ZNF688-201	ENSG00000229809.8_2	ZNF688	chr16:30580667-30584055	-	protein_coding
ENST00000223500.8_1	CHMP5-201	ENSG00000086065.13_2	CHMP5	chr9:33264940-33281537	+	protein_coding
ENST00000223641.4_1	SEC61B-201	ENSG00000106803.9_2	SEC61B	chr9:101984583-101992897	+	protein_coding
ENST00000223791.7_3	AKNA-201	ENSG00000106948.16_3	AKNA	chr9:117098445-117139244	-	protein_coding
ENST00000223864.6_1	PLGRKT-201	ENSG00000107020.9_3	PLGRKT	chr9:5357973-5437878	-	protein_coding
ENST00000224073.5_1	EDF1-201	ENSG00000107223.12_2	EDF1	chr9:139756571-139760738	-	protein_coding
ENST00000224140.5_1	SETX-201	ENSG00000107290.13_3	SETX	chr9:135136743-135230372	-	protein_coding
ENST00000224237.9_1	VIM-201	ENSG00000026025.15_3	VIM	chr10:17271277-17279592	+	protein_coding
ENST00000224337.9_2	BLNK-201	ENSG00000095585.16_2	BLNK	chr10:97951458-98031297	-	protein_coding
ENST00000224652.10_4	ATE1-201	ENSG00000107669.17_4	ATE1	chr10:123499936-123687578	-	protein_coding
ENST00000224721.10_1	CDH23-201	ENSG00000107736.19_2	CDH23	chr10:73156691-73575704	+	protein_coding
ENST00000224756.12_1	CCSER2-201	ENSG00000107771.15_3	CCSER2	chr10:86088419-86278273	+	protein_coding
ENST00000224784.10_1	ACTA2-201	ENSG00000107796.13_3	ACTA2	chr10:90694831-90712530	-	protein_coding
ENST00000224862.7_1	FBXL15-201	ENSG00000107872.12_3	FBXL15	chr10:104179571-104182893	+	protein_coding
ENST00000224949.8_1	PITRM1-201	ENSG00000107959.15_3	PITRM1	chr10:3179922-3214999	-	protein_coding
ENST00000224950.7_1	STN1-201	ENSG00000107960.10_2	STN1	chr10:105642300-105677963	-	protein_coding
ENST00000225174.7_1	PPIF-201	ENSG00000108179.13_2	PPIF	chr10:81107234-81115093	+	protein_coding
ENST00000225235.4_1	TBC1D12-201	ENSG00000108239.8_2	TBC1D12	chr10:96162261-96295687	+	protein_coding
ENST00000225275.3_1	MPO-201	ENSG00000005381.7_2	MPO	chr17:56347217-56358296	-	protein_coding
ENST00000225296.7_1	DHX33-201	ENSG00000005100.12_3	DHX33	chr17:5344232-5372380	-	protein_coding
ENST00000225298.11_1	UTP18-201	ENSG00000011260.13_2	UTP18	chr17:49337889-49375294	+	protein_coding
ENST00000225308.12_1	SLC25A39-201	ENSG00000013306.15_3	SLC25A39	chr17:42396993-42402238	-	protein_coding
ENST00000225328.9_2	P2RX5-201	ENSG00000083454.21_3	P2RX5	chr17:3576521-3599698	-	protein_coding
ENST00000225388.8_1	NUFIP2-201	ENSG00000108256.8_2	NUFIP2	chr17:27582854-27621136	-	protein_coding
ENST00000225394.7_1	GIT1-201	ENSG00000108262.15_3	GIT1	chr17:27900487-27916645	-	protein_coding
ENST00000225430.8_2	RPL19-201	ENSG00000108298.9_2	RPL19	chr17:37356536-37360980	+	protein_coding
ENST00000225504.7_1	SUPT4H1-201	ENSG00000213246.6_3	SUPT4H1	chr17:56422539-56429563	-	protein_coding
ENST00000225525.3_1	TAX1BP3-201	ENSG00000213977.7_3	TAX1BP3	chr17:3566196-3571976	-	protein_coding
ENST00000225538.3_1	P2RX1-201	ENSG00000108405.3_2	P2RX1	chr17:3799886-3819794	-	protein_coding
ENST00000225573.5_2	PNPO-201	ENSG00000108439.10_4	PNPO	chr17:46018933-46025638	+	protein_coding
ENST00000225576.7_1	TVP23C-201	ENSG00000175106.16_3	TVP23C	chr17:15405578-15466858	-	protein_coding
ENST00000225603.8_2	CBX1-201	ENSG00000108468.14_3	CBX1	chr17:46147414-46178883	-	protein_coding
ENST00000225655.5_1	PFN1-201	ENSG00000108518.7_2	PFN1	chr17:4848947-4852309	-	protein_coding
ENST00000225665.11_1	SLC25A11-201	ENSG00000108528.13_2	SLC25A11	chr17:4840425-4843546	-	protein_coding
ENST00000225698.8_1	C1QBP-201	ENSG00000108561.8_3	C1QBP	chr17:5336097-5342475	-	protein_coding
ENST00000225719.8_1	CPD-201	ENSG00000108582.11_2	CPD	chr17:28705923-28797007	+	protein_coding
ENST00000225724.9_1	GOSR1-201	ENSG00000108587.15_3	GOSR1	chr17:28804380-28854610	+	protein_coding
ENST00000225726.9_1	CCDC47-201	ENSG00000108588.13_3	CCDC47	chr17:61822610-61851135	-	protein_coding
ENST00000225728.7_1	MED31-201	ENSG00000108590.10_2	MED31	chr17:6546635-6554954	-	protein_coding
ENST00000225729.7_1	DRG2-201	ENSG00000108591.9_3	DRG2	chr17:17991200-18011285	+	protein_coding
ENST00000225737.10_1	AKAP10-201	ENSG00000108599.14_3	AKAP10	chr17:19807615-19881150	-	protein_coding
ENST00000225777.7_1	SYNGR2-201	ENSG00000108639.7_3	SYNGR2	chr17:76164639-76169608	+	protein_coding
ENST00000225792.9_1	DDX5-201	ENSG00000108654.13_3	DDX5	chr17:62495734-62502639	-	protein_coding
ENST00000225823.6_1	ASIC2-201	ENSG00000108684.14_3	ASIC2	chr17:31340105-31620006	-	protein_coding
ENST00000225831.4_1	CCL2-201	ENSG00000108691.9_2	CCL2	chr17:32582304-32584222	+	protein_coding
ENST00000225842.3_1	CCL1-201	ENSG00000108702.3_2	CCL1	chr17:32687347-32690250	-	protein_coding
ENST00000225916.9_1	KAT2A-201	ENSG00000108773.10_3	KAT2A	chr17:40265126-40273376	-	protein_coding
ENST00000225927.6_1	NAGLU-201	ENSG00000108784.9_3	NAGLU	chr17:40688190-40696467	+	protein_coding
ENST00000225941.5_2	ABI3-201	ENSG00000108798.8_3	ABI3	chr17:47287589-47300587	+	protein_coding
ENST00000225964.9_1	COL1A1-201	ENSG00000108821.13_3	COL1A1	chr17:48260650-48278993	-	protein_coding
ENST00000225969.8_1	MRPL27-201	ENSG00000108826.15_2	MRPL27	chr17:48445228-48450575	-	protein_coding
ENST00000225972.7_1	LRRC59-201	ENSG00000108829.9_3	LRRC59	chr17:48458599-48474914	-	protein_coding
ENST00000225983.10_1	HDAC5-201	ENSG00000108840.15_4	HDAC5	chr17:42154114-42201006	-	protein_coding
ENST00000226004.7_1	DUSP3-201	ENSG00000108861.8_2	DUSP3	chr17:41843489-41856356	-	protein_coding
ENST00000226091.2_1	EFNB3-201	ENSG00000108947.4_2	EFNB3	chr17:7608520-7614696	+	protein_coding
ENST00000226218.8_1	VTN-201	ENSG00000109072.13_3	VTN	chr17:26694297-26697843	-	protein_coding
ENST00000226225.6_1	TNFAIP1-201	ENSG00000109079.9_2	TNFAIP1	chr17:26662730-26674035	+	protein_coding
ENST00000226230.7_1	TMEM97-201	ENSG00000109084.13_2	TMEM97	chr17:26646121-26655711	+	protein_coding
ENST00000226247.2_1	FOXN1-201	ENSG00000109101.7_2	FOXN1	chr17:26850959-26865914	+	protein_coding
ENST00000226253.8_1	ALDOC-201	ENSG00000109107.13_3	ALDOC	chr17:26900133-26904282	-	protein_coding
ENST00000226279.7_1	CD38-201	ENSG00000004468.12_2	CD38	chr4:15779901-15854853	+	protein_coding
ENST00000226299.8_1	LAP3-201	ENSG00000002549.12_2	LAP3	chr4:17578815-17609591	+	protein_coding
ENST00000226317.9_1	CXCL6-201	ENSG00000124875.9_3	CXCL6	chr4:74702214-74704477	+	protein_coding
ENST00000226319.10_1	JADE1-201	ENSG00000077684.15_3	JADE1	chr4:129730778-129796379	+	protein_coding
ENST00000226328.8_1	RUFY3-201	ENSG00000018189.12_3	RUFY3	chr4:71587728-71659274	+	protein_coding
ENST00000226382.3_1	PHOX2B-201	ENSG00000109132.6_2	PHOX2B	chr4:41746099-41750987	-	protein_coding
ENST00000226413.4_1	GNRHR-201	ENSG00000109163.6_2	GNRHR	chr4:68605046-68620078	-	protein_coding
ENST00000226524.3_1	PF4V1-201	ENSG00000109272.3_2	PF4V1	chr4:74718906-74719872	+	protein_coding
ENST00000226574.8_1	NFKB1-201	ENSG00000109320.11_3	NFKB1	chr4:103422486-103538459	+	protein_coding
ENST00000226578.8_2	MANBA-201	ENSG00000109323.8_3	MANBA	chr4:103553050-103682151	-	protein_coding
ENST00000226725.10_1	KLHL2-201	ENSG00000109466.13_3	KLHL2	chr4:166128770-166244305	+	protein_coding
ENST00000226796.6_1	GAR1-201	ENSG00000109534.16_2	GAR1	chr4:110736709-110745893	+	protein_coding
ENST00000226798.8_1	FRG1-201	ENSG00000109536.11_2	FRG1	chr4:190861943-190884359	+	protein_coding
ENST00000227155.8_1	CD82-201	ENSG00000085117.11_3	CD82	chr11:44587141-44641913	+	protein_coding
ENST00000227163.8_1	SPI1-201	ENSG00000066336.11_2	SPI1	chr11:47376464-47399942	-	protein_coding
ENST00000227266.9_1	CTSC-201	ENSG00000109861.15_2	CTSC	chr11:88026760-88070955	-	protein_coding
ENST00000227322.7_2	ZPR1-201	ENSG00000109917.10_3	ZPR1	chr11:116644515-116658766	-	protein_coding
ENST00000227378.7_1	HSPA8-201	ENSG00000109971.13_4	HSPA8	chr11:122928205-122932040	-	protein_coding
ENST00000227451.3_1	DTX4-201	ENSG00000110042.7_2	DTX4	chr11:58939965-58976060	+	protein_coding
ENST00000227471.6_3	UNC93B1-201	ENSG00000110057.7_3	UNC93B1	chr11:67758575-67771593	-	protein_coding
ENST00000227503.13_1	SF1-201	ENSG00000168066.20_3	SF1	chr11:64532078-64546219	-	protein_coding
ENST00000227507.2_1	CCND1-201	ENSG00000110092.3_2	CCND1	chr11:69455855-69469242	+	protein_coding
ENST00000227520.9_1	CCDC86-201	ENSG00000110104.11_2	CCDC86	chr11:60609544-60618554	+	protein_coding
ENST00000227524.8_1	PRPF19-201	ENSG00000110107.8_3	PRPF19	chr11:60658202-60674060	-	protein_coding
ENST00000227525.7_1	TMEM109-201	ENSG00000110108.9_2	TMEM109	chr11:60681346-60690915	+	protein_coding
ENST00000227638.7_1	PANX1-201	ENSG00000110218.8_2	PANX1	chr11:93862094-93915138	+	protein_coding
ENST00000227752.7_1	IL10RA-201	ENSG00000110324.10_3	IL10RA	chr11:117857063-117872194	+	protein_coding
ENST00000227756.4_1	GALNT18-201	ENSG00000110328.5_3	GALNT18	chr11:11292423-11643552	-	protein_coding
ENST00000227758.6_3	BIRC2-201	ENSG00000110330.8_3	BIRC2	chr11:102217966-102249401	+	protein_coding
ENST00000227868.8_1	PDHX-201	ENSG00000110435.11_2	PDHX	chr11:34938119-35017518	+	protein_coding
ENST00000227880.7_1	SLC15A3-201	ENSG00000110446.10_3	SLC15A3	chr11:60704556-60719257	-	protein_coding
ENST00000228027.11_3	DGAT2-201	ENSG00000062282.14_3	DGAT2	chr11:75479777-75512579	+	protein_coding
ENST00000228136.8_3	C11orf58-201	ENSG00000110696.9_3	C11orf58	chr11:16759948-16777770	+	protein_coding
ENST00000228140.6_1	RPS13-201	ENSG00000110700.6_3	RPS13	chr11:17095936-17099213	-	protein_coding
ENST00000228251.8_1	YBX3-201	ENSG00000060138.12_2	YBX3	chr12:10851812-10875911	-	protein_coding
ENST00000228284.7_1	SART3-201	ENSG00000075856.11_3	SART3	chr12:108916357-108955165	-	protein_coding
ENST00000228306.8_1	RPLP0-201	ENSG00000089157.15_3	RPLP0	chr12:120634510-120639014	-	protein_coding
ENST00000228307.11_2	PXN-201	ENSG00000089159.16_3	PXN	chr12:120648250-120703574	-	protein_coding
ENST00000228425.10_2	PPFIBP1-201	ENSG00000110841.13_3	PPFIBP1	chr12:27677189-27848497	+	protein_coding
ENST00000228434.7_1	CD69-201	ENSG00000110848.8_2	CD69	chr12:9905082-9913497	-	protein_coding
ENST00000228437.9_1	PRDM4-201	ENSG00000110851.11_2	PRDM4	chr12:108126643-108154937	-	protein_coding
ENST00000228438.2_2	CLEC2B-201	ENSG00000110852.4_3	CLEC2B	chr12:10005583-10022735	-	protein_coding
ENST00000228495.10_1	KCTD10-201	ENSG00000110906.12_2	KCTD10	chr12:109886461-109915349	-	protein_coding
ENST00000228506.7_1	MLEC-201	ENSG00000110917.7_2	MLEC	chr12:121124672-121139667	+	protein_coding
ENST00000228515.5_1	CSRNP2-201	ENSG00000110925.6_2	CSRNP2	chr12:51454988-51477333	-	protein_coding
ENST00000228567.7_1	SYT10-201	ENSG00000110975.8_3	SYT10	chr12:33527173-33592754	-	protein_coding
ENST00000228740.6_1	LTA4H-201	ENSG00000111144.9_2	LTA4H	chr12:96394606-96429439	-	protein_coding
ENST00000228741.7_1	ELK3-201	ENSG00000111145.7_3	ELK3	chr12:96588160-96663613	+	protein_coding
ENST00000228799.6_1	ITFG2-201	ENSG00000111203.11_3	ITFG2	chr12:2921788-2934237	+	protein_coding
ENST00000228820.8_1	PARP11-201	ENSG00000111224.13_3	PARP11	chr12:3918027-3982540	-	protein_coding
ENST00000228825.11_1	ARPC3-201	ENSG00000111229.15_3	ARPC3	chr12:110872630-110888212	-	protein_coding
ENST00000228865.2_1	CREBL2-201	ENSG00000111269.2_2	CREBL2	chr12:12764826-12798042	+	protein_coding
ENST00000228872.8_1	CDKN1B-201	ENSG00000111276.10_3	CDKN1B	chr12:12870058-12875305	+	protein_coding
ENST00000228918.8_1	LTBR-201	ENSG00000111321.10_2	LTBR	chr12:6493199-6500729	+	protein_coding
ENST00000228928.11_1	OAS3-201	ENSG00000111331.12_2	OAS3	chr12:113376157-113411054	+	protein_coding
ENST00000228945.8_1	ARHGDIB-201	ENSG00000111348.8_3	ARHGDIB	chr12:15094951-15114603	-	protein_coding
ENST00000229022.7_1	VDR-201	ENSG00000111424.10_2	VDR	chr12:48235322-48298814	-	protein_coding
ENST00000229179.8_1	NUP107-201	ENSG00000111581.9_3	NUP107	chr12:69080514-69139589	+	protein_coding
ENST00000229195.7_2	CNOT2-201	ENSG00000111596.11_2	CNOT2	chr12:70636774-70748772	+	protein_coding
ENST00000229214.8_1	KRR1-201	ENSG00000111615.13_3	KRR1	chr12:75884641-75905401	-	protein_coding
ENST00000229238.4_1	MRPL51-201	ENSG00000111639.7_2	MRPL51	chr12:6601052-6602764	-	protein_coding
ENST00000229239.9_1	GAPDH-201	ENSG00000111640.14_2	GAPDH	chr12:6643093-6647537	+	protein_coding
ENST00000229243.6_2	ACRBP-201	ENSG00000111644.7_2	ACRBP	chr12:6747241-6756626	-	protein_coding
ENST00000229266.7_3	CHPT1-201	ENSG00000111666.10_4	CHPT1	chr12:102091405-102122852	+	protein_coding
ENST00000229268.12_1	USP5-201	ENSG00000111667.13_2	USP5	chr12:6961292-6975793	+	protein_coding
ENST00000229270.8_1	TPI1-201	ENSG00000111669.14_2	TPI1	chr12:6976283-6980112	+	protein_coding
ENST00000229277.5_1	ENO2-201	ENSG00000111674.8_3	ENO2	chr12:7023614-7032859	+	protein_coding
ENST00000229281.5_1	C12orf57-201	ENSG00000111678.10_2	C12orf57	chr12:7053186-7055165	+	protein_coding
ENST00000229314.9_2	GOLT1B-201	ENSG00000111711.9_3	GOLT1B	chr12:21654749-21671342	+	protein_coding
ENST00000229328.9_1	PRKAB1-201	ENSG00000111725.10_3	PRKAB1	chr12:120105558-120119435	+	protein_coding
ENST00000229329.6_1	CMAS-201	ENSG00000111726.12_2	CMAS	chr12:22199108-22218597	+	protein_coding
ENST00000229330.8_1	HCFC2-201	ENSG00000111727.11_3	HCFC2	chr12:104458235-104500302	+	protein_coding
ENST00000229332.11_4	CLEC4A-201	ENSG00000111729.14_4	CLEC4A	chr12:8276228-8291203	+	protein_coding
ENST00000229340.9_1	RAB35-201	ENSG00000111737.11_2	RAB35	chr12:120532899-120554643	-	protein_coding
ENST00000229379.2_1	COX6A1-201	ENSG00000111775.2_3	COX6A1	chr12:120875893-120878545	+	protein_coding
ENST00000229390.7_1	SRSF9-201	ENSG00000111786.8_2	SRSF9	chr12:120899471-120907596	-	protein_coding
ENST00000229395.7_1	FGFR1OP2-201	ENSG00000111790.13_2	FGFR1OP2	chr12:27091316-27119486	+	protein_coding
ENST00000229402.3_1	KLRB1-201	ENSG00000111796.3_2	KLRB1	chr12:9747147-9760482	-	protein_coding
ENST00000229416.10_1	GCLC-201	ENSG00000001084.10_3	GCLC	chr6:53362139-53409927	-	protein_coding
ENST00000229563.5_1	TMEM14C-201	ENSG00000111843.13_2	TMEM14C	chr6:10723208-10731362	+	protein_coding
ENST00000229595.5_1	ASF1A-201	ENSG00000111875.7_2	ASF1A	chr6:119215384-119230332	+	protein_coding
ENST00000229633.6_1	HINT3-201	ENSG00000111911.6_2	HINT3	chr6:126277927-126301390	+	protein_coding
ENST00000229634.13_1	NCOA7-201	ENSG00000111912.19_4	NCOA7	chr6:126112111-126250173	+	protein_coding
ENST00000229769.2_1	FANCE-201	ENSG00000112039.3_2	FANCE	chr6:35420138-35434880	+	protein_coding
ENST00000229794.8_3	MAPK14-201	ENSG00000112062.10_3	MAPK14	chr6:35995547-36078532	+	protein_coding
ENST00000229795.7_2	MAPK14-202	ENSG00000112062.10_3	MAPK14	chr6:35995488-36079013	+	protein_coding
ENST00000229812.7_1	STK38-201	ENSG00000112079.8_3	STK38	chr6:36461669-36515247	-	protein_coding
ENST00000229829.6_1	HLA-DOA-201	ENSG00000204252.13_3	HLA-DOA	chr6:32971955-32977389	-	protein_coding
ENST00000229854.11_1	MCM3-201	ENSG00000112118.18_2	MCM3	chr6:52128807-52149549	-	protein_coding
ENST00000229903.4_2	SAYSD1-201	ENSG00000112167.9_2	SAYSD1	chr6:39071840-39082965	-	protein_coding
ENST00000229922.6_1	CAP2-201	ENSG00000112186.11_2	CAP2	chr6:17393447-17558023	+	protein_coding
ENST00000230048.4_1	ACOT13-201	ENSG00000112304.10_2	ACOT13	chr6:24667299-24705274	+	protein_coding
ENST00000230050.3_1	RPS12-201	ENSG00000112306.7_2	RPS12	chr6:133135580-133138703	+	protein_coding
ENST00000230056.7_1	GMNN-201	ENSG00000112312.9_3	GMNN	chr6:24775166-24786327	+	protein_coding
ENST00000230085.12_1	SNX3-201	ENSG00000112335.14_2	SNX3	chr6:108532426-108582464	-	protein_coding
ENST00000230122.3_1	ZBTB24-201	ENSG00000112365.4_3	ZBTB24	chr6:109783797-109804440	-	protein_coding
ENST00000230124.7_1	FIG4-201	ENSG00000112367.10_2	FIG4	chr6:110012515-110146631	+	protein_coding
ENST00000230321.10_2	MDFI-201	ENSG00000112559.13_2	MDFI	chr6:41606185-41621984	+	protein_coding
ENST00000230323.8_1	TFEB-201	ENSG00000112561.17_3	TFEB	chr6:41651716-41702798	-	protein_coding
ENST00000230340.8_1	BYSL-201	ENSG00000112578.9_2	BYSL	chr6:41888926-41900784	+	protein_coding
ENST00000230419.8_1	PTK7-202	ENSG00000112655.15_3	PTK7	chr6:43044006-43129457	+	protein_coding
ENST00000230431.10_2	DNPH1-201	ENSG00000112667.12_3	DNPH1	chr6:43193367-43197222	-	protein_coding
ENST00000230449.8_1	EXOC2-201	ENSG00000112685.13_3	EXOC2	chr6:485133-693111	-	protein_coding
ENST00000230461.10_1	TMEM30A-201	ENSG00000112697.15_2	TMEM30A	chr6:75962640-75994684	-	protein_coding
ENST00000230480.10_1	VEGFA-201	ENSG00000112715.21_4	VEGFA	chr6:43739729-43752672	+	protein_coding
ENST00000230568.4_1	LY86-201	ENSG00000112799.8_2	LY86	chr6:6588902-6654864	+	protein_coding
ENST00000230640.9_1	SKIV2L2-201	ENSG00000039123.15_3	SKIV2L2	chr5:54603588-54721409	+	protein_coding
ENST00000230771.7_1	HARS2-201	ENSG00000112855.14_3	HARS2	chr5:140071011-140078876	+	protein_coding
ENST00000230859.7_3	PAPD7-201	ENSG00000112941.13_4	PAPD7	chr5:6713120-6757161	+	protein_coding
ENST00000230895.10_3	DAP-201	ENSG00000112977.15_3	DAP	chr5:10679342-10761384	-	protein_coding
ENST00000230901.9_1	BRD8-201	ENSG00000112983.17_3	BRD8	chr5:137492571-137514319	-	protein_coding
ENST00000230990.6_1	HBEGF-201	ENSG00000113070.7_2	HBEGF	chr5:139712428-139726216	-	protein_coding
ENST00000231004.4_1	LOX-201	ENSG00000113083.13_3	LOX	chr5:121398890-121413980	-	protein_coding
ENST00000231061.8_1	SPARC-201	ENSG00000113140.10_3	SPARC	chr5:151040657-151066726	-	protein_coding
ENST00000231121.2_1	HAND1-201	ENSG00000113196.2_2	HAND1	chr5:153854532-153857824	-	protein_coding
ENST00000231137.5_1	PCDHB7-201	ENSG00000113212.6_2	PCDHB7	chr5:140552200-140555964	+	protein_coding
ENST00000231188.9_1	GRM6-201	ENSG00000113262.14_2	GRM6	chr5:178405328-178422124	-	protein_coding
ENST00000231198.11_1	THG1L-201	ENSG00000113272.13_2	THG1L	chr5:157158205-157168456	+	protein_coding
ENST00000231238.9_1	TTC1-201	ENSG00000113312.10_2	TTC1	chr5:159436120-159492550	+	protein_coding
ENST00000231368.9_1	LNPEP-201	ENSG00000113441.15_3	LNPEP	chr5:96271168-96373219	+	protein_coding
ENST00000231420.10_1	AGXT2-201	ENSG00000113492.13_2	AGXT2	chr5:34998206-35048198	-	protein_coding
ENST00000231461.9_1	ST8SIA4-201	ENSG00000113532.12_2	ST8SIA4	chr5:100142639-100238970	-	protein_coding
ENST00000231484.3_1	PCDH12-201	ENSG00000113555.5_2	PCDH12	chr5:141323150-141338627	-	protein_coding
ENST00000231498.7_1	NUP155-201	ENSG00000113569.15_2	NUP155	chr5:37288239-37371283	-	protein_coding
ENST00000231512.4_1	C5orf15-201	ENSG00000113583.7_2	C5orf15	chr5:133291193-133304478	-	protein_coding
ENST00000231524.13_1	TRIM23-201	ENSG00000113595.14_3	TRIM23	chr5:64885507-64920473	-	protein_coding
ENST00000231572.7_1	RARS-201	ENSG00000113643.8_2	RARS	chr5:167913450-167946304	+	protein_coding
ENST00000231683.3_1	HRH2-201	ENSG00000113749.7_3	HRH2	chr5:175110237-175111316	+	protein_coding
ENST00000231721.6_1	SEMA3G-201	ENSG00000010319.6_3	SEMA3G	chr3:52467069-52479043	-	protein_coding
ENST00000231749.7_1	ZMYND10-201	ENSG00000004838.13_2	ZMYND10	chr3:50378541-50384283	-	protein_coding
ENST00000231751.8_2	LTF-201	ENSG00000012223.12_2	LTF	chr3:46477136-46506653	-	protein_coding
ENST00000231790.6_1	MLH1-201	ENSG00000076242.14_2	MLH1	chr3:37034823-37092409	+	protein_coding
ENST00000231887.7_1	EHHADH-201	ENSG00000113790.10_3	EHHADH	chr3:184908412-184971886	-	protein_coding
ENST00000231948.8_1	CRBN-201	ENSG00000113851.14_2	CRBN	chr3:3191695-3221394	-	protein_coding
ENST00000232375.7_1	PFKFB4-201	ENSG00000114268.11_3	PFKFB4	chr3:48555117-48594323	-	protein_coding
ENST00000232424.3_1	HES1-201	ENSG00000114315.3_2	HES1	chr3:193853934-193856521	+	protein_coding
ENST00000232496.4_1	TUSC2-201	ENSG00000114383.9_3	TUSC2	chr3:50362338-50365674	-	protein_coding
ENST00000232564.7_1	GNB4-201	ENSG00000114450.9_3	GNB4	chr3:179113877-179169378	-	protein_coding
ENST00000232603.9_1	MORC1-201	ENSG00000114487.9_2	MORC1	chr3:108677086-108836989	-	protein_coding
ENST00000232607.6_2	UMPS-201	ENSG00000114491.13_2	UMPS	chr3:124449213-124468120	+	protein_coding
ENST00000232744.12_1	ABTB1-201	ENSG00000114626.17_3	ABTB1	chr3:127391783-127399760	+	protein_coding
ENST00000232766.5_1	KLHL18-201	ENSG00000114648.11_2	KLHL18	chr3:47324436-47388306	+	protein_coding
ENST00000232854.8_1	HEMK1-201	ENSG00000114735.9_3	HEMK1	chr3:50606628-50622366	+	protein_coding
ENST00000232888.6_1	RRP9-201	ENSG00000114767.6_2	RRP9	chr3:51967446-51975957	-	protein_coding
ENST00000232905.3_1	EIF1B-201	ENSG00000114784.3_2	EIF1B	chr3:40351175-40353915	+	protein_coding
ENST00000232974.10_1	ZBTB47-201	ENSG00000114853.13_2	ZBTB47	chr3:42695176-42707346	+	protein_coding
ENST00000232975.7_1	TNNC1-201	ENSG00000114854.7_3	TNNC1	chr3:52485118-52488086	-	protein_coding
ENST00000232978.12_1	NKTR-201	ENSG00000114857.17_2	NKTR	chr3:42642106-42690233	+	protein_coding
ENST00000233027.9_1	NEK4-201	ENSG00000114904.12_2	NEK4	chr3:52742465-52804965	-	protein_coding
ENST00000233047.8_2	TMEM159-201	ENSG00000011638.10_3	TMEM159	chr16:21169698-21191937	+	protein_coding
ENST00000233055.8_1	WDFY1-201	ENSG00000085449.14_3	WDFY1	chr2:224740064-224810104	-	protein_coding
ENST00000233057.8_1	EIF2AK2-201	ENSG00000055332.16_3	EIF2AK2	chr2:37326353-37384190	-	protein_coding
ENST00000233072.9_1	CPS1-201	ENSG00000021826.14_3	CPS1	chr2:211421262-211543831	+	protein_coding
ENST00000233099.5_1	HEATR5B-201	ENSG00000008869.11_2	HEATR5B	chr2:37208040-37311485	-	protein_coding
ENST00000233114.12_1	MDH1-201	ENSG00000014641.17_2	MDH1	chr2:63815743-63834331	+	protein_coding
ENST00000233121.6_1	MAPRE3-201	ENSG00000084764.10_3	MAPRE3	chr2:27193480-27250064	+	protein_coding
ENST00000233143.5_1	TMSB10-201	ENSG00000034510.5_2	TMSB10	chr2:85132749-85133799	+	protein_coding
ENST00000233154.8_1	NCK2-201	ENSG00000071051.13_3	NCK2	chr2:106361354-106510730	+	protein_coding
ENST00000233156.8_2	TFPI-201	ENSG00000003436.15_3	TFPI	chr2:188328988-188419219	-	protein_coding
ENST00000233190.10_1	NDUFS1-201	ENSG00000023228.13_3	NDUFS1	chr2:206979541-207024327	-	protein_coding
ENST00000233202.10_1	SLC11A1-201	ENSG00000018280.16_2	SLC11A1	chr2:219246752-219261617	+	protein_coding
ENST00000233331.11_1	INO80B-201	ENSG00000115274.14_3	INO80B	chr2:74682150-74685087	+	protein_coding
ENST00000233336.6_1	TTL-201	ENSG00000114999.7_2	TTL	chr2:113239731-113299316	+	protein_coding
ENST00000233379.8_1	FAHD2A-201	ENSG00000115042.9_3	FAHD2A	chr2:96068474-96082364	+	protein_coding
ENST00000233468.4_1	SF3B6-201	ENSG00000115128.6_2	SF3B6	chr2:24290454-24299313	-	protein_coding
ENST00000233545.6_1	MPV17-201	ENSG00000115204.14_2	MPV17	chr2:27532360-27545431	-	protein_coding
ENST00000233557.7_1	NRBP1-201	ENSG00000115216.13_2	NRBP1	chr2:27650657-27665126	+	protein_coding
ENST00000233573.6_1	ITGA4-201	ENSG00000115232.13_2	ITGA4	chr2:182322155-182374532	+	protein_coding
ENST00000233575.6_1	SNX17-201	ENSG00000115234.10_2	SNX17	chr2:27593389-27599995	+	protein_coding
ENST00000233596.7_4	REEP6-201	ENSG00000115255.10_4	REEP6	chr19:1490746-1497926	+	protein_coding
ENST00000233609.8_1	RPS15-201	ENSG00000115268.9_4	RPS15	chr19:1438357-1440493	+	protein_coding
ENST00000233612.8_2	GCA-201	ENSG00000115271.10_3	GCA	chr2:163200848-163217632	+	protein_coding
ENST00000233615.6_3	WBP1-201	ENSG00000239779.6_4	WBP1	chr2:74685456-74688018	+	protein_coding
ENST00000233616.8_1	MOGS-201	ENSG00000115275.11_3	MOGS	chr2:74688184-74692537	-	protein_coding
ENST00000233627.13_1	NDUFS7-201	ENSG00000115286.19_3	NDUFS7	chr19:1383630-1395588	+	protein_coding
ENST00000233630.10_1	PCGF1-201	ENSG00000115289.13_3	PCGF1	chr2:74732170-74735707	-	protein_coding
ENST00000233668.9_1	DOK1-201	ENSG00000115325.13_2	DOK1	chr2:74781213-74784681	+	protein_coding
ENST00000233710.3_1	ACADL-201	ENSG00000115361.7_2	ACADL	chr2:211052663-211090215	-	protein_coding
ENST00000233809.8_2	IGFBP2-201	ENSG00000115457.9_3	IGFBP2	chr2:217498118-217529159	+	protein_coding
ENST00000233813.4_1	IGFBP5-201	ENSG00000115461.4_3	IGFBP5	chr2:217536828-217560248	-	protein_coding
ENST00000233838.8_1	GGCX-201	ENSG00000115486.11_2	GGCX	chr2:85771846-85788632	-	protein_coding
ENST00000233893.9_1	HSPE1-201	ENSG00000115541.10_3	HSPE1	chr2:198364718-198368181	+	protein_coding
ENST00000233948.3_1	WNT6-201	ENSG00000115596.3_2	WNT6	chr2:219724544-219738955	+	protein_coding
ENST00000233997.3_1	AZU1-201	ENSG00000172232.9_2	AZU1	chr19:827836-832018	+	protein_coding
ENST00000234038.10_1	PPP1R7-201	ENSG00000115685.14_2	PPP1R7	chr2:242089437-242123067	+	protein_coding
ENST00000234091.8_1	ID2-201	ENSG00000115738.9_2	ID2	chr2:8818975-8824583	+	protein_coding
ENST00000234111.8_1	ODC1-201	ENSG00000115758.12_3	ODC1	chr2:10580094-10588630	-	protein_coding
ENST00000234115.10_1	PLEKHB2-201	ENSG00000115762.16_3	PLEKHB2	chr2:131862517-131907425	+	protein_coding
ENST00000234160.4_1	GORASP2-201	ENSG00000115806.12_2	GORASP2	chr2:171785036-171823639	+	protein_coding
ENST00000234170.9_1	CEBPZ-201	ENSG00000115816.14_3	CEBPZ	chr2:37428755-37458856	-	protein_coding
ENST00000234198.8_1	DLX2-201	ENSG00000115844.10_2	DLX2	chr2:172964167-172967628	-	protein_coding
ENST00000234296.6_1	ORC2-201	ENSG00000115942.8_2	ORC2	chr2:201773696-201828403	-	protein_coding
ENST00000234301.2_1	COX7A2L-201	ENSG00000115944.14_3	COX7A2L	chr2:42577647-42588356	-	protein_coding
ENST00000234310.7_1	PPP3R1-201	ENSG00000221823.10_3	PPP3R1	chr2:68405989-68479663	-	protein_coding
ENST00000234313.7_1	PLEK-201	ENSG00000115956.9_2	PLEK	chr2:68592305-68624585	+	protein_coding
ENST00000234347.9_1	PRTN3-201	ENSG00000196415.9_2	PRTN3	chr19:840960-848175	+	protein_coding
ENST00000234389.3_1	GRIN3B-201	ENSG00000116032.5_2	GRIN3B	chr19:1000418-1009731	+	protein_coding
ENST00000234420.9_1	MSH6-201	ENSG00000116062.14_3	MSH6	chr2:48010221-48037240	+	protein_coding
ENST00000234453.9_1	PLEKHA3-201	ENSG00000116095.10_2	PLEKHA3	chr2:179345195-179381189	+	protein_coding
ENST00000234590.8_1	ENO1-201	ENSG00000074800.13_3	ENO1	chr1:8921061-8938749	-	protein_coding
ENST00000234677.6_1	SARS-201	ENSG00000031698.12_2	SARS	chr1:109756540-109780742	+	protein_coding
ENST00000234816.6_1	ANGPTL1-201	ENSG00000116194.12_3	ANGPTL1	chr1:178818840-178840187	-	protein_coding
ENST00000234827.5_2	TCEANC2-201	ENSG00000116205.12_3	TCEANC2	chr1:54519274-54571755	+	protein_coding
ENST00000234831.9_2	TMEM59-201	ENSG00000116209.11_3	TMEM59	chr1:54492354-54519111	-	protein_coding
ENST00000234875.8_1	RPL22-201	ENSG00000116251.9_3	RPL22	chr1:6245080-6259672	-	protein_coding
ENST00000235090.9_1	WDR77-201	ENSG00000116455.13_3	WDR77	chr1:111982512-111991998	-	protein_coding
ENST00000235150.4_1	RNF19B-201	ENSG00000116514.16_2	RNF19B	chr1:33402269-33430286	-	protein_coding
ENST00000235307.6_1	C1orf21-201	ENSG00000116667.12_3	C1orf21	chr1:184356192-184598154	+	protein_coding
ENST00000235310.7_1	MAD2L2-201	ENSG00000116670.14_3	MAD2L2	chr1:11734537-11751707	-	protein_coding
ENST00000235329.9_1	MFN2-201	ENSG00000116688.16_2	MFN2	chr1:12040369-12073565	+	protein_coding
ENST00000235332.5_1	MIIP-201	ENSG00000116691.10_2	MIIP	chr1:12079523-12092102	+	protein_coding
ENST00000235345.5_1	SLC35D1-201	ENSG00000116704.7_2	SLC35D1	chr1:67465015-67519782	-	protein_coding
ENST00000235372.11_1	PRDM2-201	ENSG00000116731.22_3	PRDM2	chr1:14031350-14151574	+	protein_coding
ENST00000235382.6_1	RGS2-201	ENSG00000116741.7_2	RGS2	chr1:192778171-192781413	+	protein_coding
ENST00000235835.7_1	AKR7A2-201	ENSG00000053371.12_3	AKR7A2	chr1:19630459-19638640	-	protein_coding
ENST00000235933.10_1	CD160-201	ENSG00000117281.15_3	CD160	chr1:145695798-145706842	-	protein_coding
ENST00000236040.8_1	P3H1-201	ENSG00000117385.15_2	P3H1	chr1:43212046-43232683	-	protein_coding
ENST00000236067.8_1	ATP6V0B-201	ENSG00000117410.13_3	ATP6V0B	chr1:44440620-44443961	+	protein_coding
ENST00000236137.9_1	SLC19A2-201	ENSG00000117479.12_3	SLC19A2	chr1:169433147-169455241	-	protein_coding
ENST00000236147.4_1	SELL-201	ENSG00000188404.8_2	SELL	chr1:169659808-169680839	-	protein_coding
ENST00000236192.11_1	VAMP4-201	ENSG00000117533.14_2	VAMP4	chr1:171669300-171711387	-	protein_coding
ENST00000236273.8_1	SYF2-201	ENSG00000117614.9_2	SYF2	chr1:25549170-25558984	-	protein_coding
ENST00000236412.11_1	PPP1R8-201	ENSG00000117751.17_3	PPP1R8	chr1:28157325-28178039	+	protein_coding
ENST00000236671.6_2	CTSD-201	ENSG00000117984.13_3	CTSD	chr11:1773982-1785222	-	protein_coding
ENST00000236709.3_1	A4GNT-201	ENSG00000118017.3_2	A4GNT	chr3:137842560-137851229	-	protein_coding
ENST00000236826.7_1	MMP8-201	ENSG00000118113.11_2	MMP8	chr11:102582526-102595685	-	protein_coding
ENST00000236938.10_1	FCRLA-201	ENSG00000132185.16_3	FCRLA	chr1:161676762-161684138	+	protein_coding
ENST00000236957.9_1	EEF1B2-201	ENSG00000114942.13_2	EEF1B2	chr2:207024309-207027652	+	protein_coding
ENST00000236959.13_1	ATIC-201	ENSG00000138363.14_3	ATIC	chr2:216176540-216214486	+	protein_coding
ENST00000236980.10_1	FASTKD2-201	ENSG00000118246.13_3	FASTKD2	chr2:207630081-207657233	+	protein_coding
ENST00000237014.7_1	TTR-201	ENSG00000118271.9_2	TTR	chr18:29171689-29178974	+	protein_coding
ENST00000237264.8_2	TBPL1-201	ENSG00000028839.9_3	TBPL1	chr6:134274333-134311570	+	protein_coding
ENST00000237281.4_1	FBXO30-201	ENSG00000118496.4_2	FBXO30	chr6:146114638-146135889	-	protein_coding
ENST00000237289.8_2	TNFAIP3-201	ENSG00000118503.14_3	TNFAIP3	chr6:138188581-138204449	+	protein_coding
ENST00000237305.11_3	SGK1-201	ENSG00000118515.11_3	SGK1	chr6:134490390-134496034	-	protein_coding
ENST00000237380.11_1	MED28-201	ENSG00000118579.12_3	MED28	chr4:17616254-17635728	+	protein_coding
ENST00000237455.4_1	RNF103-201	ENSG00000239305.6_3	RNF103	chr2:86830516-86850978	-	protein_coding
ENST00000237500.9_1	MYL12B-201	ENSG00000118680.12_2	MYL12B	chr18:3261907-3278282	+	protein_coding
ENST00000237530.10_1	RPN2-201	ENSG00000118705.16_3	RPN2	chr20:35807449-35870026	+	protein_coding
ENST00000237536.8_3	SOGA1-201	ENSG00000149639.14_4	SOGA1	chr20:35405845-35492089	-	protein_coding
ENST00000237596.6_1	PKD2-201	ENSG00000118762.7_2	PKD2	chr4:88928820-88998929	+	protein_coding
ENST00000237623.11_1	SPP1-201	ENSG00000118785.13_3	SPP1	chr4:88896819-88904578	+	protein_coding
ENST00000237654.8_1	CCNI-201	ENSG00000118816.9_3	CCNI	chr4:77968311-77997158	-	protein_coding
ENST00000237853.8_1	ELL2-201	ENSG00000118985.15_2	ELL2	chr5:95220802-95297775	-	protein_coding
ENST00000237858.10_1	GLRX-201	ENSG00000173221.13_2	GLRX	chr5:95149553-95158709	-	protein_coding
ENST00000237889.8_1	NDUFB3-201	ENSG00000119013.8_2	NDUFB3	chr2:201936462-201950473	+	protein_coding
ENST00000237937.7_1	ZFAND5-201	ENSG00000107372.12_2	ZFAND5	chr9:74966341-74979508	-	protein_coding
ENST00000238081.7_1	YWHAQ-201	ENSG00000134308.13_2	YWHAQ	chr2:9724101-9771143	-	protein_coding
ENST00000238091.8_1	ITGB1BP1-201	ENSG00000119185.12_2	ITGB1BP1	chr2:9545813-9563635	-	protein_coding
ENST00000238112.7_1	CPSF3-201	ENSG00000119203.13_2	CPSF3	chr2:9563697-9613230	+	protein_coding
ENST00000238146.8_1	DDX55-201	ENSG00000111364.15_2	DDX55	chr12:124086646-124105488	+	protein_coding
ENST00000238156.7_1	CCDC92-201	ENSG00000119242.8_3	CCDC92	chr12:124420169-124457371	-	protein_coding
ENST00000238181.11_1	LGALS8-201	ENSG00000116977.18_2	LGALS8	chr1:236687173-236708115	+	protein_coding
ENST00000238379.9_1	HDHD3-201	ENSG00000119431.9_2	HDHD3	chr9:116135699-116138455	-	protein_coding
ENST00000238497.9_1	VPS4B-201	ENSG00000119541.9_3	VPS4B	chr18:61056423-61089696	-	protein_coding
ENST00000238609.3_1	IFI27L2-201	ENSG00000119632.3_2	IFI27L2	chr14:94594118-94596001	-	protein_coding
ENST00000238616.9_1	NEK9-201	ENSG00000119638.12_3	NEK9	chr14:75546056-75593783	-	protein_coding
ENST00000238647.4_1	IRF2BPL-201	ENSG00000119669.4_2	IRF2BPL	chr14:77490886-77495042	-	protein_coding
ENST00000238667.8_1	FLVCR2-201	ENSG00000119686.9_3	FLVCR2	chr14:76044960-76114510	+	protein_coding
ENST00000238714.7_1	PAPOLG-201	ENSG00000115421.12_2	PAPOLG	chr2:60983365-61026098	+	protein_coding
ENST00000238738.8_1	RHOQ-201	ENSG00000119729.11_3	RHOQ	chr2:46769867-46810260	+	protein_coding
ENST00000238788.13_1	TMEM214-201	ENSG00000119777.18_3	TMEM214	chr2:27255822-27264563	+	protein_coding
ENST00000238789.9_1	ATAD2B-201	ENSG00000119778.14_3	ATAD2B	chr2:23971534-24149984	-	protein_coding
ENST00000238831.8_1	YIPF4-201	ENSG00000119820.10_3	YIPF4	chr2:32502979-32541663	+	protein_coding
ENST00000238855.11_1	AFTPH-201	ENSG00000119844.15_2	AFTPH	chr2:64751439-64820131	+	protein_coding
ENST00000238856.8_1	AFTPH-202	ENSG00000119844.15_2	AFTPH	chr2:64751439-64820139	+	protein_coding
ENST00000238875.9_1	LGALSL-201	ENSG00000119862.12_3	LGALSL	chr2:64681226-64688515	+	protein_coding
ENST00000238892.3_1	CRIPT-201	ENSG00000119878.5_2	CRIPT	chr2:46844290-46852881	+	protein_coding
ENST00000238936.8_2	MFSD13A-201	ENSG00000138111.14_3	MFSD13A	chr10:104221152-104236802	+	protein_coding
ENST00000238961.8_1	SLF2-201	ENSG00000119906.11_2	SLF2	chr10:102672326-102724893	+	protein_coding
ENST00000239007.11_3	MXI1-201	ENSG00000119950.20_4	MXI1	chr10:111985751-112046264	+	protein_coding
ENST00000239151.5_1	HOXB5-201	ENSG00000120075.5_3	HOXB5	chr17:46668619-46671323	-	protein_coding
ENST00000239174.6_1	HOXB1-201	ENSG00000120094.6_2	HOXB1	chr17:46605888-46608359	-	protein_coding
ENST00000239223.3_1	DUSP1-201	ENSG00000120129.5_2	DUSP1	chr5:172195093-172198198	-	protein_coding
ENST00000239231.6_1	PANK3-201	ENSG00000120137.6_3	PANK3	chr5:167975500-168006605	-	protein_coding
ENST00000239440.8_1	ARAP3-201	ENSG00000120318.15_2	ARAP3	chr5:141032968-141061788	-	protein_coding
ENST00000239449.6_1	PCDHB14-201	ENSG00000120327.6_3	PCDHB14	chr5:140602504-140607331	+	protein_coding
ENST00000239450.4_1	PCDHB12-201	ENSG00000120328.6_2	PCDHB12	chr5:140588291-140592143	+	protein_coding
ENST00000239451.6_1	SLC25A2-201	ENSG00000120329.6_3	SLC25A2	chr5:140682196-140683612	-	protein_coding
ENST00000239614.8_2	MSANTD2-201	ENSG00000120458.10_2	MSANTD2	chr11:124636394-124670569	-	protein_coding
ENST00000239690.8_1	NUDCD1-201	ENSG00000120526.10_2	NUDCD1	chr8:110253148-110346614	-	protein_coding
ENST00000239830.8_1	CCDC77-201	ENSG00000120647.9_4	CCDC77	chr12:510742-551811	+	protein_coding
ENST00000239878.8_1	UFM1-201	ENSG00000120686.11_2	UFM1	chr13:38924018-38937756	+	protein_coding
ENST00000239882.6_2	ELF1-201	ENSG00000120690.15_3	ELF1	chr13:41506170-41593450	-	protein_coding
ENST00000239891.3_2	ALG5-201	ENSG00000120697.8_3	ALG5	chr13:37523967-37573504	-	protein_coding
ENST00000239906.9_1	FAM53C-201	ENSG00000120709.10_2	FAM53C	chr5:137673721-137685418	+	protein_coding
ENST00000239938.4_1	EGR1-201	ENSG00000120738.7_2	EGR1	chr5:137801179-137805004	+	protein_coding
ENST00000239940.11_1	PFN2-201	ENSG00000070087.13_3	PFN2	chr3:149682691-149688896	-	protein_coding
ENST00000239944.6_1	SERP1-201	ENSG00000120742.10_2	SERP1	chr3:150259781-150264428	-	protein_coding
ENST00000240050.8_1	MTERF2-201	ENSG00000120832.9_3	MTERF2	chr12:107371069-107380944	-	protein_coding
ENST00000240055.7_1	NFYB-201	ENSG00000120837.7_3	NFYB	chr12:104510855-104532067	-	protein_coding
ENST00000240079.10_1	WASHC3-201	ENSG00000120860.10_3	WASHC3	chr12:102406717-102455902	-	protein_coding
ENST00000240095.10_2	SLC39A14-201	ENSG00000104635.13_4	SLC39A14	chr8:22224800-22291642	+	protein_coding
ENST00000240100.6_1	DUSP4-201	ENSG00000120875.8_2	DUSP4	chr8:29190581-29208185	-	protein_coding
ENST00000240123.11_2	SORBS3-201	ENSG00000120896.13_3	SORBS3	chr8:22409208-22433301	+	protein_coding
ENST00000240139.9_1	PPP3CC-201	ENSG00000120910.14_3	PPP3CC	chr8:22298596-22398638	+	protein_coding
ENST00000240185.7_1	TARDBP-201	ENSG00000120948.16_4	TARDBP	chr1:11072457-11086477	+	protein_coding
ENST00000240285.9_1	RDH10-201	ENSG00000121039.9_2	RDH10	chr8:74206847-74237516	+	protein_coding
ENST00000240304.5_1	LUC7L3-201	ENSG00000108848.15_3	LUC7L3	chr17:48796964-48830070	+	protein_coding
ENST00000240316.4_1	COIL-201	ENSG00000121058.4_3	COIL	chr17:55015548-55038415	-	protein_coding
ENST00000240328.3_1	TBX2-201	ENSG00000121068.13_2	TBX2	chr17:59477257-59486786	+	protein_coding
ENST00000240364.6_1	FAM117A-201	ENSG00000121104.7_3	FAM117A	chr17:47787694-47841529	-	protein_coding
ENST00000240488.7_1	MND1-201	ENSG00000121211.7_3	MND1	chr4:154265801-154336270	+	protein_coding
ENST00000240499.7_1	ZNF141-201	ENSG00000131127.13_2	ZNF141	chr4:331624-369047	+	protein_coding
ENST00000240587.4_1	TSHZ3-201	ENSG00000121297.6_2	TSHZ3	chr19:31765851-31840453	-	protein_coding
ENST00000240617.9_1	PLBD1-201	ENSG00000121316.10_2	PLBD1	chr12:14656595-14721283	-	protein_coding
ENST00000240618.10_1	KLRK1-201	ENSG00000213809.8_3	KLRK1	chr12:10524952-10542617	-	protein_coding
ENST00000240651.13_1	PYROXD1-201	ENSG00000121350.15_2	PYROXD1	chr12:21590611-21624186	+	protein_coding
ENST00000240731.4_2	ZNF211-201	ENSG00000121417.13_2	ZNF211	chr19:58144596-58154136	+	protein_coding
ENST00000240851.8_1	TFG-201	ENSG00000114354.13_3	TFG	chr3:100428269-100467810	+	protein_coding
ENST00000240922.7_1	NAA50-201	ENSG00000121579.12_3	NAA50	chr3:113435307-113465121	-	protein_coding
ENST00000241041.7_1	PEX16-201	ENSG00000121680.15_2	PEX16	chr11:45931220-45939380	-	protein_coding
ENST00000241052.4_1	CAT-201	ENSG00000121691.4_2	CAT	chr11:34460472-34493609	+	protein_coding
ENST00000241125.3_1	GJA3-201	ENSG00000121743.3_2	GJA3	chr13:20712394-20735188	-	protein_coding
ENST00000241261.6_1	TNFSF10-201	ENSG00000121858.10_2	TNFSF10	chr3:172223298-172241297	-	protein_coding
ENST00000241305.3_1	CPXM2-201	ENSG00000121898.12_3	CPXM2	chr10:125505152-125651330	-	protein_coding
ENST00000241337.8_1	GSTM2-201	ENSG00000213366.12_3	GSTM2	chr1:110210688-110217908	+	protein_coding
ENST00000241393.3_1	CXCR4-201	ENSG00000121966.6_2	CXCR4	chr2:136871921-136875735	-	protein_coding
ENST00000241416.11_1	ACVR2A-201	ENSG00000121989.14_2	ACVR2A	chr2:148602086-148688393	+	protein_coding
ENST00000241436.8_1	POLK-201	ENSG00000122008.15_3	POLK	chr5:74807581-74896969	+	protein_coding
ENST00000241502.8_1	FYTTD1-201	ENSG00000122068.12_2	FYTTD1	chr3:197476621-197514467	+	protein_coding
ENST00000241704.7_1	COPA-201	ENSG00000122218.14_2	COPA	chr1:160259063-160313190	-	protein_coding
ENST00000242057.8_1	AHR-201	ENSG00000106546.12_2	AHR	chr7:17338246-17385774	+	protein_coding
ENST00000242059.9_1	SCRN1-201	ENSG00000136193.16_3	SCRN1	chr7:29959719-30029414	-	protein_coding
ENST00000242067.10_1	BBS9-201	ENSG00000122507.20_3	BBS9	chr7:33169144-33645680	+	protein_coding
ENST00000242108.8_1	EEPD1-201	ENSG00000122547.10_2	EEPD1	chr7:36192758-36341152	+	protein_coding
ENST00000242208.4_1	INHBA-201	ENSG00000122641.10_3	INHBA	chr7:41724712-41742706	-	protein_coding
ENST00000242210.11_1	NT5C3A-201	ENSG00000122643.18_3	NT5C3A	chr7:33053760-33102409	-	protein_coding
ENST00000242249.8_1	RAMP3-201	ENSG00000122679.8_2	RAMP3	chr7:45197390-45223849	+	protein_coding
ENST00000242275.6_1	SLC25A51-201	ENSG00000122696.13_3	SLC25A51	chr9:37887648-37904130	-	protein_coding
ENST00000242285.10_2	CLTA-201	ENSG00000122705.16_2	CLTA	chr9:36190934-36212056	+	protein_coding
ENST00000242323.8_1	DCAF10-201	ENSG00000122741.15_3	DCAF10	chr9:37800551-37867663	+	protein_coding
ENST00000242351.9_1	ZC3HAV1-201	ENSG00000105939.12_3	ZC3HAV1	chr7:138728266-138794394	-	protein_coding
ENST00000242465.3_1	SRGN-201	ENSG00000122862.4_2	SRGN	chr10:70847874-70864567	+	protein_coding
ENST00000242480.3_1	EGR2-201	ENSG00000122877.15_3	EGR2	chr10:64571756-64576115	-	protein_coding
ENST00000242505.10_1	FAM149B1-201	ENSG00000138286.14_3	FAM149B1	chr10:74927924-75004262	+	protein_coding
ENST00000242577.10_1	DYNLL1-201	ENSG00000088986.10_3	DYNLL1	chr12:120933859-120936296	+	protein_coding
ENST00000242591.9_1	IFT81-201	ENSG00000122970.15_2	IFT81	chr12:110562182-110656602	+	protein_coding
ENST00000242592.8_1	ACADS-201	ENSG00000122971.8_2	ACADS	chr12:121163538-121177811	+	protein_coding
ENST00000242607.12_1	HVCN1-201	ENSG00000122986.13_2	HVCN1	chr12:111086584-111126962	-	protein_coding
ENST00000242719.3_1	RNF11-201	ENSG00000123091.4_2	RNF11	chr1:51701943-51739127	+	protein_coding
ENST00000242728.4_1	BHLHE41-201	ENSG00000123095.5_2	BHLHE41	chr12:26272959-26278060	-	protein_coding
ENST00000242770.9_1	STX10-201	ENSG00000104915.14_3	STX10	chr19:13254876-13260992	-	protein_coding
ENST00000242776.8_1	DDX39A-201	ENSG00000123136.14_2	DDX39A	chr19:14519663-14530179	-	protein_coding
ENST00000242783.10_1	PKN1-201	ENSG00000123143.12_3	PKN1	chr19:14544169-14582671	+	protein_coding
ENST00000242784.4_1	TRIR-201	ENSG00000123144.10_3	TRIR	chr19:12841454-12845589	-	protein_coding
ENST00000242786.5_1	ADGRE5-201	ENSG00000123146.19_3	ADGRE5	chr19:14492256-14519533	+	protein_coding
ENST00000242804.4	ZNF442-001	ENSG00000198342.5	ZNF442	chr19:12460185-12476447	-	protein_coding
ENST00000242848.8_2	ZC3H13-201	ENSG00000123200.16_4	ZC3H13	chr13:46528600-46626881	-	protein_coding
ENST00000242994.3_1	NEUROD4-201	ENSG00000123307.3_2	NEUROD4	chr12:55413729-55423798	+	protein_coding
ENST00000243052.7_1	PDE1B-201	ENSG00000123360.11_2	PDE1B	chr12:54943134-54973023	+	protein_coding
ENST00000243056.4_1	HOXC13-201	ENSG00000123364.4_2	HOXC13	chr12:54332549-54340328	+	protein_coding
ENST00000243077.7_1	LRP1-201	ENSG00000123384.13_3	LRP1	chr12:57522282-57607134	+	protein_coding
ENST00000243103.3_1	HOXC12-201	ENSG00000123407.3_3	HOXC12	chr12:54348618-54352740	+	protein_coding
ENST00000243189.11_1	RSRP1-201	ENSG00000117616.17_3	RSRP1	chr1:25568728-25574010	-	protein_coding
ENST00000243253.7_1	SEC61A1-201	ENSG00000058262.9_2	SEC61A1	chr3:127771212-127790525	+	protein_coding
ENST00000243286.7_1	TCEAL3-201	ENSG00000196507.10_3	TCEAL3	chrX:102862834-102864854	+	protein_coding
ENST00000243300.13_1	NRK-201	ENSG00000123572.16_3	NRK	chrX:105066536-105202602	+	protein_coding
ENST00000243326.9_1	RIF1-201	ENSG00000080345.17_3	RIF1	chr2:152266455-152338686	+	protein_coding
ENST00000243344.7_1	TTC21B-201	ENSG00000123607.14_2	TTC21B	chr2:166729872-166810353	-	protein_coding
ENST00000243346.9_1	NMI-201	ENSG00000123609.10_3	NMI	chr2:152126979-152146571	-	protein_coding
ENST00000243347.4_1	TNFAIP6-201	ENSG00000123610.4_2	TNFAIP6	chr2:152214106-152236562	+	protein_coding
ENST00000243389.7_1	SLC36A1-201	ENSG00000123643.12_3	SLC36A1	chr5:150827157-150871942	+	protein_coding
ENST00000243457.3_1	KCNJ2-201	ENSG00000123700.4_3	KCNJ2	chr17:68165676-68176189	+	protein_coding
ENST00000243501.9_1	PLA2G12A-201	ENSG00000123739.10_2	PLA2G12A	chr4:110631145-110651233	-	protein_coding
ENST00000243563.7_1	SNRPA-201	ENSG00000077312.8_3	SNRPA	chr19:41256764-41271294	+	protein_coding
ENST00000243578.7_1	B9D2-201	ENSG00000123810.7_2	B9D2	chr19:41860326-41870078	-	protein_coding
ENST00000243644.8_1	ZNF350-201	ENSG00000256683.6_3	ZNF350	chr19:52467596-52490079	-	protein_coding
ENST00000243662.10_1	RAB38-201	ENSG00000123892.11_3	RAB38	chr11:87846410-87908635	-	protein_coding
ENST00000243706.8_1	HAUS3-201	ENSG00000214367.7_3	HAUS3	chr4:2230076-2243860	-	protein_coding
ENST00000243776.10_1	CHPF-201	ENSG00000123989.13_2	CHPF	chr2:220403669-220408509	-	protein_coding
ENST00000243786.2_1	INHA-201	ENSG00000123999.4_2	INHA	chr2:220436917-220440435	+	protein_coding
ENST00000243878.8_1	ENKD1-201	ENSG00000124074.11_2	ENKD1	chr16:67696848-67700667	-	protein_coding
ENST00000243903.5_1	ACTR5-201	ENSG00000101442.9_2	ACTR5	chr20:37377085-37401163	+	protein_coding
ENST00000243918.9_1	SYS1-201	ENSG00000204070.9_3	SYS1	chr20:43991668-43997855	+	protein_coding
ENST00000243997.7_1	ATP5E-201	ENSG00000124172.9_2	ATP5E	chr20:57600522-57607437	-	protein_coding
ENST00000244007.7_1	PLCG1-201	ENSG00000124181.14_3	PLCG1	chr20:39765600-39804361	+	protein_coding
ENST00000244020.4_1	SRSF6-201	ENSG00000124193.14_2	SRSF6	chr20:42086568-42092887	+	protein_coding
ENST00000244040.3_1	RAB22A-201	ENSG00000124209.3_2	RAB22A	chr20:56884752-56942563	+	protein_coding
ENST00000244051.2_1	MOCS3-201	ENSG00000124217.4_2	MOCS3	chr20:49575363-49580468	+	protein_coding
ENST00000244061.5_1	RNF114-201	ENSG00000124226.10_3	RNF114	chr20:48552885-48570429	+	protein_coding
ENST00000244137.11_1	PEPD-201	ENSG00000124299.13_2	PEPD	chr19:33877856-34012700	-	protein_coding
ENST00000244204.10_1	NAGK-201	ENSG00000124357.12_2	NAGK	chr2:71295752-71305695	+	protein_coding
ENST00000244221.8_1	PAIP2B-201	ENSG00000124374.8_2	PAIP2B	chr2:71409869-71454213	-	protein_coding
ENST00000244227.7_1	SNRNP27-201	ENSG00000124380.10_3	SNRNP27	chr2:70120692-70132349	+	protein_coding
ENST00000244230.6_1	MPHOSPH10-201	ENSG00000124383.8_2	MPHOSPH10	chr2:71357444-71377231	+	protein_coding
ENST00000244289.8_1	LIPE-201	ENSG00000079435.9_3	LIPE	chr19:42905659-42931578	-	protein_coding
ENST00000244336.9_2	CEACAM8-201	ENSG00000124469.11_3	CEACAM8	chr19:43084393-43099082	-	protein_coding
ENST00000244426.10_1	FBXO9-201	ENSG00000112146.16_3	FBXO9	chr6:52935650-52965671	+	protein_coding
ENST00000244496.5_1	RRP36-201	ENSG00000124541.6_2	RRP36	chr6:42989383-42997335	+	protein_coding
ENST00000244519.6_1	BTN3A3-201	ENSG00000111801.15_3	BTN3A3	chr6:26440700-26453643	+	protein_coding
ENST00000244520.9_1	SNRPC-201	ENSG00000124562.9_3	SNRPC	chr6:34725183-34741571	+	protein_coding
ENST00000244533.7_3	ABCC10-201	ENSG00000124574.14_4	ABCC10	chr6:43399489-43418163	+	protein_coding
ENST00000244534.6_1	HIST1H1D-201	ENSG00000124575.6_2	HIST1H1D	chr6:26234496-26235161	-	protein_coding
ENST00000244565.7_1	UNC5CL-201	ENSG00000124602.9_3	UNC5CL	chr6:40994650-41006956	-	protein_coding
ENST00000244571.4_1	AARS2-201	ENSG00000124608.4_2	AARS2	chr6:44267391-44281063	-	protein_coding
ENST00000244601.3	HIST1H2BG-001	ENSG00000187990.4	HIST1H2BG	chr6:26216428-26216872	-	protein_coding
ENST00000244623.1_1	OR2B6-201	ENSG00000124657.1_2	OR2B6	chr6:27925019-27925960	+	protein_coding
ENST00000244709.8_1	TREM1-201	ENSG00000124731.12_3	TREM1	chr6:41242942-41254457	-	protein_coding
ENST00000244711.3_1	MEA1-201	ENSG00000124733.3_2	MEA1	chr6:42979832-42981706	-	protein_coding
ENST00000244741.9_1	CDKN1A-201	ENSG00000124762.13_2	CDKN1A	chr6:36646435-36655116	+	protein_coding
ENST00000244745.3_2	SOX4-201	ENSG00000124766.6_3	SOX4	chr6:21592999-21598850	+	protein_coding
ENST00000244751.6_1	CPNE5-201	ENSG00000124772.11_2	CPNE5	chr6:36708555-36807778	-	protein_coding
ENST00000244763.8_1	SSR1-201	ENSG00000124783.12_3	SSR1	chr6:7281376-7313440	-	protein_coding
ENST00000244769.8_1	ATXN1-201	ENSG00000124788.17_3	ATXN1	chr6:16299343-16761687	-	protein_coding
ENST00000244776.11_1	DEK-201	ENSG00000124795.14_3	DEK	chr6:18225701-18264772	-	protein_coding
ENST00000244815.9_3	LRRFIP1-201	ENSG00000124831.18_4	LRRFIP1	chr2:238600859-238674558	+	protein_coding
ENST00000244869.2_1	EREG-201	ENSG00000124882.3_2	EREG	chr4:75230860-75254468	+	protein_coding
ENST00000245046.6_1	EMC3-201	ENSG00000125037.12_3	EMC3	chr3:10004221-10028804	-	protein_coding
ENST00000245157.9_1	BBS2-201	ENSG00000125124.11_3	BBS2	chr16:56518297-56554195	-	protein_coding
ENST00000245185.5_1	MT2A-201	ENSG00000125148.6_2	MT2A	chr16:56642111-56643409	+	protein_coding
ENST00000245206.9_1	GOT2-201	ENSG00000125166.12_2	GOT2	chr16:58741035-58768261	-	protein_coding
ENST00000245222.8_1	SPHK2-201	ENSG00000063176.15_4	SPHK2	chr19:49122548-49133662	+	protein_coding
ENST00000245304.4_1	RAP2A-201	ENSG00000125249.6_2	RAP2A	chr13:98086476-98121382	+	protein_coding
ENST00000245323.4_1	EFNB2-201	ENSG00000125266.6_3	EFNB2	chr13:107142079-107187462	-	protein_coding
ENST00000245414.8_1	IRF1-201	ENSG00000125347.13_3	IRF1	chr5:131817301-131826490	-	protein_coding
ENST00000245441.9_2	NIN-201	ENSG00000100503.23_3	NIN	chr14:51186481-51297839	-	protein_coding
ENST00000245457.5_1	PTGER2-201	ENSG00000125384.6_2	PTGER2	chr14:52781113-52795324	+	protein_coding
ENST00000245458.10_1	RPS29-201	ENSG00000213741.9_3	RPS29	chr14:50050290-50053094	-	protein_coding
ENST00000245479.2_1	SOX9-201	ENSG00000125398.5_2	SOX9	chr17:70117161-70122561	+	protein_coding
ENST00000245539.10_1	MRPS7-201	ENSG00000125445.10_2	MRPS7	chr17:73257755-73262454	+	protein_coding
ENST00000245543.5_1	ARMC7-201	ENSG00000125449.6_2	ARMC7	chr17:73106082-73126360	+	protein_coding
ENST00000245544.8_1	NUP85-201	ENSG00000125450.10_2	NUP85	chr17:73201786-73231853	+	protein_coding
ENST00000245615.5_1	MBOAT7-201	ENSG00000125505.16_3	MBOAT7	chr19:54677109-54693666	-	protein_coding
ENST00000245621.5	LILRA6-001	ENSG00000244482.5	LILRA6	chr19:54742829-54746600	-	protein_coding
ENST00000245680.6_1	SLC35F5-201	ENSG00000115084.13_2	SLC35F5	chr2:114470369-114514400	-	protein_coding
ENST00000245787.8_1	INSIG2-201	ENSG00000125629.14_2	INSIG2	chr2:118846050-118867604	+	protein_coding
ENST00000245796.10_1	PSD4-201	ENSG00000125637.15_3	PSD4	chr2:113931548-113960814	+	protein_coding
ENST00000245812.7_1	ALKBH7-201	ENSG00000125652.7_2	ALKBH7	chr19:6372444-6375262	+	protein_coding
ENST00000245816.8_1	CLPP-201	ENSG00000125656.8_3	CLPP	chr19:6361463-6368919	+	protein_coding
ENST00000245838.12_1	THOC2-201	ENSG00000125676.19_2	THOC2	chrX:122734413-122866904	-	protein_coding
ENST00000245865.10_2	STRADA-201	ENSG00000266173.6_3	STRADA	chr17:61780195-61819121	-	protein_coding
ENST00000245907.10_1	C3-201	ENSG00000125730.16_3	C3	chr19:6677715-6720693	-	protein_coding
ENST00000245912.7_1	TNFSF14-201	ENSG00000125735.10_2	TNFSF14	chr19:6661264-6670128	-	protein_coding
ENST00000245923.8_1	RTN2-201	ENSG00000125744.11_2	RTN2	chr19:45988547-46000319	-	protein_coding
ENST00000245925.7_1	EML2-201	ENSG00000125746.16_4	EML2	chr19:46112658-46142685	-	protein_coding
ENST00000245932.10_1	VASP-201	ENSG00000125753.13_2	VASP	chr19:46010674-46030241	+	protein_coding
ENST00000245960.9_1	CDC25B-201	ENSG00000101224.17_3	CDC25B	chr20:3776482-3786765	+	protein_coding
ENST00000246006.4_1	CD93-201	ENSG00000125810.9_2	CD93	chr20:23059986-23066977	-	protein_coding
ENST00000246015.8_2	PSMF1-201	ENSG00000125818.17_3	PSMF1	chr20:1099241-1147972	+	protein_coding
ENST00000246024.6_1	TMX4-201	ENSG00000125827.8_2	TMX4	chr20:7957995-8000476	-	protein_coding
ENST00000246041.6_1	AP5S1-201	ENSG00000125843.10_3	AP5S1	chr20:3801171-3805954	+	protein_coding
ENST00000246069.11_1	DSTN-201	ENSG00000125868.15_2	DSTN	chr20:17550508-17590564	+	protein_coding
ENST00000246070.2_1	LAMP5-201	ENSG00000125869.9_2	LAMP5	chr20:9495008-9511171	+	protein_coding
ENST00000246071.7_1	SNRPB2-201	ENSG00000125870.10_2	SNRPB2	chr20:16710629-16723208	+	protein_coding
ENST00000246080.3_2	TCF15-201	ENSG00000125878.6_3	TCF15	chr20:584441-591042	-	protein_coding
ENST00000246104.6_1	SCRT2-201	ENSG00000215397.3_3	SCRT2	chr20:642240-656823	-	protein_coding
ENST00000246115.4_1	S1PR4-201	ENSG00000125910.5_2	S1PR4	chr19:3178766-3180330	+	protein_coding
ENST00000246117.8_1	NCLN-201	ENSG00000125912.10_3	NCLN	chr19:3185598-3209568	+	protein_coding
ENST00000246151.8_1	PITHD1-201	ENSG00000057757.9_3	PITHD1	chr1:24104895-24114722	+	protein_coding
ENST00000246163.2_1	MAX-201	ENSG00000125952.18_2	MAX	chr14:65550462-65569227	-	protein_coding
ENST00000246166.2_1	FNTB-201	ENSG00000257365.7_3	FNTB	chr14:65453438-65529316	+	protein_coding
ENST00000246186.7_1	MMP24-201	ENSG00000125966.9_2	MMP24	chr20:33814457-33864803	+	protein_coding
ENST00000246194.7_1	RALY-201	ENSG00000125970.11_4	RALY	chr20:32581528-32668077	+	protein_coding
ENST00000246229.4_1	PLAGL2-201	ENSG00000126003.6_2	PLAGL2	chr20:30780306-30795594	-	protein_coding
ENST00000246337.8_1	UROD-201	ENSG00000126088.13_3	UROD	chr1:45477819-45481247	+	protein_coding
ENST00000246421.4_1	SLC35E2-201	ENSG00000215790.6_3	SLC35E2	chr1:1663681-1677431	-	protein_coding
ENST00000246532.5_3	IGFLR1-201	ENSG00000126246.9_4	IGFLR1	chr19:36229702-36233351	-	protein_coding
ENST00000246533.7_1	CAPNS1-201	ENSG00000126247.10_4	CAPNS1	chr19:36630477-36641254	+	protein_coding
ENST00000246548.8_1	UBA2-201	ENSG00000126261.12_3	UBA2	chr19:34919268-34962156	+	protein_coding
ENST00000246549.2_1	FFAR2-201	ENSG00000126262.4_2	FFAR2	chr19:35940617-35942667	+	protein_coding
ENST00000246551.8_1	HCST-201	ENSG00000126264.9_2	HCST	chr19:36393382-36395279	+	protein_coding
ENST00000246553.3_1	FFAR1-201	ENSG00000126266.3_2	FFAR1	chr19:35842455-35844764	+	protein_coding
ENST00000246554.7_1	COX6B1-201	ENSG00000126267.8_2	COX6B1	chr19:36139125-36149763	+	protein_coding
ENST00000246657.2_1	CCR7-201	ENSG00000126353.3_3	CCR7	chr17:38710021-38721724	-	protein_coding
ENST00000246662.8_1	KRT9-201	ENSG00000171403.9_2	KRT9	chr17:39722093-39728310	-	protein_coding
ENST00000246672.3_1	NR1D1-201	ENSG00000126368.5_2	NR1D1	chr17:38249040-38256978	-	protein_coding
ENST00000246747.8_1	ARL2-201	ENSG00000213465.7_3	ARL2	chr11:64781585-64789656	+	protein_coding
ENST00000246792.3_1	RRAS-201	ENSG00000126458.3_2	RRAS	chr19:50138549-50143458	-	protein_coding
ENST00000246802.9_1	NOP53-201	ENSG00000105373.18_3	NOP53	chr19:48248779-48260315	+	protein_coding
ENST00000246841.3_1	FLRT1-201	ENSG00000126500.3_3	FLRT1	chr11:63870660-63886645	+	protein_coding
ENST00000246868.6_1	SBDS-201	ENSG00000126524.9_2	SBDS	chr7:66452664-66460588	-	protein_coding
ENST00000246912.8_1	MLX-201	ENSG00000108788.11_2	MLX	chr17:40719090-40725257	+	protein_coding
ENST00000246914.9_1	WNK4-201	ENSG00000126562.16_2	WNK4	chr17:40932696-40948954	+	protein_coding
ENST00000246957.9_1	TRAP1-201	ENSG00000126602.10_3	TRAP1	chr16:3708038-3767598	-	protein_coding
ENST00000247001.9_1	SUGP1-201	ENSG00000105705.15_4	SUGP1	chr19:19387320-19431653	-	protein_coding
ENST00000247003.8_1	DDX49-201	ENSG00000105671.11_2	DDX49	chr19:19030484-19039436	+	protein_coding
ENST00000247020.8_1	SDF2-201	ENSG00000132581.9_3	SDF2	chr17:26975374-26989193	-	protein_coding
ENST00000247026.9_2	NSRP1-201	ENSG00000126653.17_3	NSRP1	chr17:28443799-28513493	+	protein_coding
ENST00000247153.7_2	CFP-201	ENSG00000126759.13_3	CFP	chrX:47483613-47489704	-	protein_coding
ENST00000247161.7_1	ELK1-201	ENSG00000126767.17_2	ELK1	chrX:47494920-47509887	-	protein_coding
ENST00000247178.5_1	ATG14-201	ENSG00000126775.8_3	ATG14	chr14:55833110-55878576	-	protein_coding
ENST00000247182.6_1	SIX1-201	ENSG00000126778.8_2	SIX1	chr14:61110133-61116180	-	protein_coding
ENST00000247191.6_1	DLGAP5-201	ENSG00000126787.12_3	DLGAP5	chr14:55614854-55658396	-	protein_coding
ENST00000247194.8_1	L3HYPDH-201	ENSG00000126790.11_3	L3HYPDH	chr14:59939335-59951148	-	protein_coding
ENST00000247207.6_1	HSPA2-201	ENSG00000126803.9_3	HSPA2	chr14:65007186-65009952	+	protein_coding
ENST00000247225.6_1	SGPP1-201	ENSG00000126821.7_2	SGPP1	chr14:64150932-64194757	-	protein_coding
ENST00000247226.12_1	PLEKHG3-201	ENSG00000126822.16_3	PLEKHG3	chr14:65171315-65216965	+	protein_coding
ENST00000247270.3_1	EVI2A-201	ENSG00000126860.11_3	EVI2A	chr17:29644578-29648767	-	protein_coding
ENST00000247291.7_2	AIF1L-201	ENSG00000126878.12_2	AIF1L	chr9:133971929-133998532	+	protein_coding
ENST00000247461.8_1	CANX-201	ENSG00000127022.14_3	CANX	chr5:179125907-179157926	+	protein_coding
ENST00000247470.9_2	PYCARD-201	ENSG00000103490.13_3	PYCARD	chr16:31212806-31214313	-	protein_coding
ENST00000247655.3_2	COX7C-201	ENSG00000127184.12_4	COX7C	chr5:85913721-85916779	+	protein_coding
ENST00000247665.11_1	PHPT1-201	ENSG00000054148.17_3	PHPT1	chr9:139743546-139745474	+	protein_coding
ENST00000247668.6_1	TRAF2-201	ENSG00000127191.17_2	TRAF2	chr9:139780970-139821059	+	protein_coding
ENST00000247706.3_1	ABHD8-201	ENSG00000127220.5_3	ABHD8	chr19:17402940-17414282	-	protein_coding
ENST00000247815.8_1	HELB-201	ENSG00000127311.9_2	HELB	chr12:66696325-66741425	+	protein_coding
ENST00000247833.11_2	RAB3IP-201	ENSG00000127328.21_3	RAB3IP	chr12:70132461-70211157	+	protein_coding
ENST00000247843.6_1	YEATS4-201	ENSG00000127337.6_2	YEATS4	chr12:69753483-69784576	+	protein_coding
ENST00000247866.8_3	NDUFB2-201	ENSG00000090266.12_4	NDUFB2	chr7:140396472-140406446	+	protein_coding
ENST00000247879.2_1	TAS2R3-201	ENSG00000127362.2_3	TAS2R3	chr7:141463897-141464997	+	protein_coding
ENST00000247883.5_1	TAS2R5-201	ENSG00000127366.5_2	TAS2R5	chr7:141490017-141491167	+	protein_coding
ENST00000247930.4_1	ZNF777-201	ENSG00000196453.7_2	ZNF777	chr7:149128454-149158214	-	protein_coding
ENST00000247933.8_1	IDUA-201	ENSG00000127415.12_3	IDUA	chr4:980785-998294	+	protein_coding
ENST00000247970.8_1	PIN1-201	ENSG00000127445.13_3	PIN1	chr19:9945999-9960358	+	protein_coding
ENST00000248054.9_2	SIN3B-201	ENSG00000127511.9_3	SIN3B	chr19:16940211-16991161	+	protein_coding
ENST00000248070.10_2	EPS15L1-201	ENSG00000127527.13_3	EPS15L1	chr19:16472392-16582896	-	protein_coding
ENST00000248071.5_1	KLF2-201	ENSG00000127528.5_2	KLF2	chr19:16435628-16438685	+	protein_coding
ENST00000248076.3_1	F2RL3-201	ENSG00000127533.3_2	F2RL3	chr19:16999671-17003417	+	protein_coding
ENST00000248089.7_1	HCFC1R1-201	ENSG00000103145.10_2	HCFC1R1	chr16:3072621-3074247	-	protein_coding
ENST00000248098.7_1	JPT2-201	ENSG00000206053.12_4	JPT2	chr16:1728257-1752087	+	protein_coding
ENST00000248104.11_1	UNKL-201	ENSG00000059145.18_4	UNKL	chr16:1413206-1429684	-	protein_coding
ENST00000248114.6_2	GFER-201	ENSG00000127554.12_2	GFER	chr16:2034214-2037750	+	protein_coding
ENST00000248150.4_1	GNG13-201	ENSG00000127588.4_2	GNG13	chr16:848041-850733	-	protein_coding
ENST00000248244.5_2	TICAM1-201	ENSG00000127666.9_2	TICAM1	chr19:4815944-4831716	-	protein_coding
ENST00000248248.7_1	MON1B-201	ENSG00000103111.14_3	MON1B	chr16:77224816-77236302	+	protein_coding
ENST00000248306.7_1	METTL25-201	ENSG00000127720.7_3	METTL25	chr12:82752276-82873015	+	protein_coding
ENST00000248342.8_1	EIF3K-201	ENSG00000178982.9_3	EIF3K	chr19:39109737-39127595	+	protein_coding
ENST00000248378.5_1	EMC6-201	ENSG00000127774.6_2	EMC6	chr17:3572109-3572959	+	protein_coding
ENST00000248437.8_1	TUBA4A-201	ENSG00000127824.13_3	TUBA4A	chr2:220114433-220118754	-	protein_coding
ENST00000248444.9_1	VIL1-201	ENSG00000127831.10_3	VIL1	chr2:219283815-219318018	+	protein_coding
ENST00000248450.8_1	AAMP-201	ENSG00000127837.9_2	AAMP	chr2:219128846-219134980	-	protein_coding
ENST00000248451.7_1	PNKD-201	ENSG00000127838.13_2	PNKD	chr2:219135115-219137670	+	protein_coding
ENST00000248553.6_1	HSPB1-201	ENSG00000106211.8_2	HSPB1	chr7:75931861-75933612	+	protein_coding
ENST00000248564.5_1	GNG11-201	ENSG00000127920.5_2	GNG11	chr7:93551011-93557922	+	protein_coding
ENST00000248566.3_4	SEM1-201	ENSG00000127922.9_4	SEM1	chr7:96317263-96339203	-	protein_coding
ENST00000248594.10_1	PTPN12-201	ENSG00000127947.15_2	PTPN12	chr7:77166592-77269388	+	protein_coding
ENST00000248598.5_1	FGL2-201	ENSG00000127951.6_3	FGL2	chr7:76822688-76829143	-	protein_coding
ENST00000248600.5_1	STYXL1-201	ENSG00000127952.16_2	STYXL1	chr7:75625656-75677321	-	protein_coding
ENST00000248633.8_1	PEX1-201	ENSG00000127980.15_2	PEX1	chr7:92116334-92157845	-	protein_coding
ENST00000248668.4_1	LRFN1-201	ENSG00000128011.4_3	LRFN1	chr19:39797208-39805976	-	protein_coding
ENST00000248846.9_2	TUBGCP6-201	ENSG00000128159.11_4	TUBGCP6	chr22:50656118-50682993	-	protein_coding
ENST00000248879.7_1	DGCR6L-201	ENSG00000128185.9_3	DGCR6L	chr22:20301799-20307603	-	protein_coding
ENST00000248899.10_1	NCF4-201	ENSG00000100365.14_3	NCF4	chr22:37257030-37274057	+	protein_coding
ENST00000248901.10_1	CYTH4-201	ENSG00000100055.20_3	CYTH4	chr22:37678424-37711386	+	protein_coding
ENST00000248924.10_1	GCAT-201	ENSG00000100116.16_3	GCAT	chr22:38203919-38212906	+	protein_coding
ENST00000248929.13_1	SGSM3-201	ENSG00000100359.20_3	SGSM3	chr22:40766615-40806293	+	protein_coding
ENST00000248948.3_1	VPREB3-201	ENSG00000128218.7_2	VPREB3	chr22:24094930-24096655	-	protein_coding
ENST00000248958.4_1	SDF2L1-201	ENSG00000128228.4_2	SDF2L1	chr22:21996550-21998587	+	protein_coding
ENST00000248975.5_1	YWHAH-201	ENSG00000128245.14_3	YWHAH	chr22:32340447-32353590	+	protein_coding
ENST00000249014.4_3	CDC42EP1-201	ENSG00000128283.6_4	CDC42EP1	chr22:37956454-37965412	+	protein_coding
ENST00000249042.7_1	TST-201	ENSG00000128311.13_3	TST	chr22:37406900-37415568	-	protein_coding
ENST00000249064.8_1	CCDC117-201	ENSG00000159873.9_2	CCDC117	chr22:29168662-29185283	+	protein_coding
ENST00000249066.10_1	APOL2-201	ENSG00000128335.13_3	APOL2	chr22:36622256-36636000	-	protein_coding
ENST00000249071.10_3	RAC2-201	ENSG00000128340.14_3	RAC2	chr22:37621301-37640310	-	protein_coding
ENST00000249075.3_1	LIF-201	ENSG00000128342.4_2	LIF	chr22:30636436-30642840	-	protein_coding
ENST00000249116.6_1	APOBEC3A-201	ENSG00000128383.12_2	APOBEC3A	chr22:39353527-39359188	+	protein_coding
ENST00000249269.8_1	PMPCB-201	ENSG00000105819.13_2	PMPCB	chr7:102937869-102953682	+	protein_coding
ENST00000249289.4_1	ATP6V1F-201	ENSG00000128524.4_2	ATP6V1F	chr7:128502880-128505897	+	protein_coding
ENST00000249299.6_1	LSM8-201	ENSG00000128534.7_3	LSM8	chr7:117824086-117832878	+	protein_coding
ENST00000249330.2_1	VGF-201	ENSG00000128564.6_2	VGF	chr7:100805790-100808874	-	protein_coding
ENST00000249344.6_1	STRIP2-201	ENSG00000128578.9_3	STRIP2	chr7:129074274-129128240	+	protein_coding
ENST00000249356.3_1	DNAJB9-201	ENSG00000128590.4_2	DNAJB9	chr7:108210012-108215294	+	protein_coding
ENST00000249363.3_1	LRRC4-201	ENSG00000128594.7_3	LRRC4	chr7:127667124-127671123	-	protein_coding
ENST00000249364.8_1	CALU-201	ENSG00000128595.16_3	CALU	chr7:128379396-128411528	+	protein_coding
ENST00000249373.7_1	SMO-201	ENSG00000128602.9_3	SMO	chr7:128828713-128853386	+	protein_coding
ENST00000249499.7_2	HOXD9-201	ENSG00000128709.12_3	HOXD9	chr2:176987448-176989665	+	protein_coding
ENST00000249504.6_1	HOXD11-201	ENSG00000128713.13_3	HOXD11	chr2:176972014-176974316	+	protein_coding
ENST00000249601.8_1	ARHGAP22-201	ENSG00000128805.14_3	ARHGAP22	chr10:49654077-49813138	-	protein_coding
ENST00000249636.10_1	PIAS1-201	ENSG00000033800.13_2	PIAS1	chr15:68346517-68486184	+	protein_coding
ENST00000249647.7_1	SNAP23-201	ENSG00000092531.9_2	SNAP23	chr15:42787458-42825259	+	protein_coding
ENST00000249700.8_1	TMOD2-201	ENSG00000128872.9_3	TMOD2	chr15:52043758-52108565	+	protein_coding
ENST00000249736.11_1	SLTM-201	ENSG00000137776.16_2	SLTM	chr15:59186357-59225778	-	protein_coding
ENST00000249750.8_1	ALDH1A2-201	ENSG00000128918.14_3	ALDH1A2	chr15:58245622-58358616	-	protein_coding
ENST00000249786.8_3	SERF2-201	ENSG00000140264.19_4	SERF2	chr15:44084040-44086793	+	protein_coding
ENST00000249806.10_2	CLN6-201	ENSG00000128973.12_3	CLN6	chr15:68499330-68522081	-	protein_coding
ENST00000249822.8_1	ARPP19-201	ENSG00000128989.10_2	ARPP19	chr15:52839441-52861361	-	protein_coding
ENST00000249842.7_2	ISLR-201	ENSG00000129009.12_3	ISLR	chr15:74466012-74469213	+	protein_coding
ENST00000249923.7_1	COPB1-201	ENSG00000129083.12_3	COPB1	chr11:14479052-14521398	-	protein_coding
ENST00000250003.3_1	MYOD1-201	ENSG00000129152.3_2	MYOD1	chr11:17741115-17743678	+	protein_coding
ENST00000250018.6_1	TPH1-201	ENSG00000129167.9_3	TPH1	chr11:18039111-18062872	-	protein_coding
ENST00000250092.10_1	CD68-201	ENSG00000129226.13_3	CD68	chr17:7482785-7485431	+	protein_coding
ENST00000250101.9_1	TXNDC17-201	ENSG00000129235.10_2	TXNDC17	chr17:6544078-6547861	+	protein_coding
ENST00000250111.8_1	ATP1B2-201	ENSG00000129244.8_2	ATP1B2	chr17:7554430-7561086	+	protein_coding
ENST00000250113.11_1	FXR2-201	ENSG00000129245.11_2	FXR2	chr17:7494548-7518185	-	protein_coding
ENST00000250237.9_1	QTRT1-201	ENSG00000213339.8_3	QTRT1	chr19:10812127-10824041	+	protein_coding
ENST00000250340.8_1	CLEC11A-201	ENSG00000105472.12_2	CLEC11A	chr19:51226586-51228974	+	protein_coding
ENST00000250360.7_1	SIGLEC9-201	ENSG00000129450.8_2	SIGLEC9	chr19:51628165-51633567	+	protein_coding
ENST00000250377.11_2	KIAA0391-201	ENSG00000100890.15_3	KIAA0391	chr14:35591770-35746820	+	protein_coding
ENST00000250405.9_2	BCL2L2-201	ENSG00000129473.9_3	BCL2L2	chr14:23775971-23780968	+	protein_coding
ENST00000250448.2_1	FOXA1-201	ENSG00000129514.5_2	FOXA1	chr14:38059189-38064239	-	protein_coding
ENST00000250454.7_1	EAPP-201	ENSG00000129518.8_2	EAPP	chr14:34985135-35008916	-	protein_coding
ENST00000250457.7_1	EGLN3-201	ENSG00000129521.13_3	EGLN3	chr14:34393437-34420287	-	protein_coding
ENST00000250489.8_1	TMEM55B-201	ENSG00000165782.10_2	TMEM55B	chr14:20925878-20929771	-	protein_coding
ENST00000250495.9_1	NEDD8-201	ENSG00000129559.12_3	NEDD8	chr14:24686058-24701660	-	protein_coding
ENST00000250498.8_1	DAD1-201	ENSG00000129562.10_2	DAD1	chr14:23033805-23058175	-	protein_coding
ENST00000250559.13_1	RAP1B-201	ENSG00000127314.17_3	RAP1B	chr12:69004619-69065681	+	protein_coding
ENST00000250617.6_1	ARHGEF6-201	ENSG00000129675.15_2	ARHGEF6	chrX:135747706-135864247	-	protein_coding
ENST00000250699.2_1	CHRNA10-201	ENSG00000129749.3_3	CHRNA10	chr11:3686817-3692614	-	protein_coding
ENST00000250784.12_1	RPS4Y1-201	ENSG00000129824.15_3	RPS4Y1	chrY:2709527-2735309	+	protein_coding
ENST00000250894.8_2	MAPK8IP3-201	ENSG00000138834.12_3	MAPK8IP3	chr16:1756184-1820318	+	protein_coding
ENST00000250896.7_1	MKNK2-201	ENSG00000099875.14_3	MKNK2	chr19:2037481-2051243	-	protein_coding
ENST00000250916.5_1	KLF16-201	ENSG00000129911.8_2	KLF16	chr19:1852398-1863567	-	protein_coding
ENST00000251038.9_1	ZC3H14-201	ENSG00000100722.18_2	ZC3H14	chr14:89029253-89093940	+	protein_coding
ENST00000251047.5_1	LMAN1-201	ENSG00000074695.5_2	LMAN1	chr18:56995055-57027194	-	protein_coding
ENST00000251076.9_1	DMXL2-201	ENSG00000104093.13_3	DMXL2	chr15:51739908-51915030	-	protein_coding
ENST00000251089.6_2	ANGEL1-201	ENSG00000013523.9_3	ANGEL1	chr14:77252521-77279283	-	protein_coding
ENST00000251143.9_1	C16orf62-201	ENSG00000103544.14_3	C16orf62	chr16:19566737-19712485	+	protein_coding
ENST00000251170.11_1	SEC14L5-201	ENSG00000103184.11_3	SEC14L5	chr16:5008318-5069159	+	protein_coding
ENST00000251195.9_2	CLSPN-201	ENSG00000092853.13_2	CLSPN	chr1:36185819-36235568	-	protein_coding
ENST00000251203.13_1	PBX4-201	ENSG00000105717.13_3	PBX4	chr19:19672522-19729725	-	protein_coding
ENST00000251241.8_1	DHX40-201	ENSG00000108406.9_2	DHX40	chr17:57642886-57685706	+	protein_coding
ENST00000251287.2_1	HCN2-201	ENSG00000099822.2_2	HCN2	chr19:589893-617159	+	protein_coding
ENST00000251296.3_1	IGSF21-201	ENSG00000117154.11_3	IGSF21	chr1:18434240-18704976	+	protein_coding
ENST00000251303.10_2	SLX1A-201	ENSG00000132207.17_4	SLX1A	chr16:30205238-30208882	+	protein_coding
ENST00000251343.9_1	KHNYN-201	ENSG00000100441.9_2	KHNYN	chr14:24898492-24911040	+	protein_coding
ENST00000251363.9_1	CERS4-201	ENSG00000090661.11_2	CERS4	chr19:8274237-8327305	+	protein_coding
ENST00000251376.7_2	LILRA2-201	ENSG00000239998.5_3	LILRA2	chr19:55085259-55101752	+	protein_coding
ENST00000251413.7_1	TUBG1-201	ENSG00000131462.7_2	TUBG1	chr17:40761694-40767252	+	protein_coding
ENST00000251453.7_1	RPS16-201	ENSG00000105193.8_2	RPS16	chr19:39923847-39926588	-	protein_coding
ENST00000251473.9_1	PLPPR2-201	ENSG00000105520.10_2	PLPPR2	chr19:11466062-11476374	+	protein_coding
ENST00000251496.6_1	NCAPG-201	ENSG00000109805.9_2	NCAPG	chr4:17812525-17846485	+	protein_coding
ENST00000251507.8_1	RABGAP1L-201	ENSG00000152061.23_3	RABGAP1L	chr1:174128655-174927319	+	protein_coding
ENST00000251527.9_1	ESYT2-201	ENSG00000117868.15_2	ESYT2	chr7:158523686-158622319	-	protein_coding
ENST00000251535.10_1	ALOX12-201	ENSG00000108839.11_3	ALOX12	chr17:6899384-6914055	+	protein_coding
ENST00000251595.10_1	HBA2-201	ENSG00000188536.12_2	HBA2	chr16:222846-223709	+	protein_coding
ENST00000251607.10_1	TRNT1-201	ENSG00000072756.16_2	TRNT1	chr3:3168600-3190707	+	protein_coding
ENST00000251636.9_1	DHX29-201	ENSG00000067248.9_2	DHX29	chr5:54552073-54603550	-	protein_coding
ENST00000251642.7_1	DHX58-201	ENSG00000108771.12_3	DHX58	chr17:40253422-40264751	-	protein_coding
ENST00000251722.10_1	USP40-201	ENSG00000085982.13_2	USP40	chr2:234384172-234475428	-	protein_coding
ENST00000251739.9_1	VPS50-201	ENSG00000004766.15_2	VPS50	chr7:92861653-92905740	+	protein_coding
ENST00000251775.8_1	SNX4-201	ENSG00000114520.10_3	SNX4	chr3:125165488-125239041	-	protein_coding
ENST00000251810.7_1	RRM2B-201	ENSG00000048392.11_2	RRM2B	chr8:103216730-103251346	-	protein_coding
ENST00000251822.6_1	RHOBTB2-201	ENSG00000008853.16_2	RHOBTB2	chr8:22857092-22877712	+	protein_coding
ENST00000251849.8_1	RAF1-201	ENSG00000132155.11_2	RAF1	chr3:12625100-12705725	-	protein_coding
ENST00000251871.8_2	MED17-201	ENSG00000042429.11_3	MED17	chr11:93517393-93548129	+	protein_coding
ENST00000251879.10_1	RIC1-201	ENSG00000107036.11_2	RIC1	chr9:5629025-5769674	+	protein_coding
ENST00000251968.3_1	TSG101-201	ENSG00000074319.12_3	TSG101	chr11:18501858-18548779	-	protein_coding
ENST00000252011.7_1	DHX35-201	ENSG00000101452.14_3	DHX35	chr20:37590978-37668366	+	protein_coding
ENST00000252015.2_2	TRPC4AP-201	ENSG00000100991.11_2	TRPC4AP	chr20:33590207-33680674	-	protein_coding
ENST00000252029.7_1	TYMP-201	ENSG00000025708.13_3	TYMP	chr22:50964181-50968485	-	protein_coding
ENST00000252032.9_1	C20orf194-201	ENSG00000088854.12_3	C20orf194	chr20:3229951-3388272	-	protein_coding
ENST00000252102.8_1	NDUFA2-201	ENSG00000131495.8_2	NDUFA2	chr5:140024870-140027370	-	protein_coding
ENST00000252108.7_1	UBE4A-201	ENSG00000110344.9_2	UBE4A	chr11:118230300-118269926	+	protein_coding
ENST00000252115.9_1	POLDIP3-201	ENSG00000100227.17_2	POLDIP3	chr22:42979727-43010968	-	protein_coding
ENST00000252136.11_3	TRMT2A-201	ENSG00000099899.14_4	TRMT2A	chr22:20099389-20104818	-	protein_coding
ENST00000252137.10_1	ESS2-201	ENSG00000100056.11_3	ESS2	chr22:19117792-19132197	-	protein_coding
ENST00000252229.6_2	MICB-201	ENSG00000204516.9_3	MICB	chr6:31465892-31478901	+	protein_coding
ENST00000252242.8_1	KRT5-201	ENSG00000186081.11_3	KRT5	chr12:52908359-52914471	-	protein_coding
ENST00000252288.7_2	GAMT-201	ENSG00000130005.12_2	GAMT	chr19:1397025-1401552	-	protein_coding
ENST00000252321.4_1	KCNA5-201	ENSG00000130037.4_2	KCNA5	chr12:5153155-5155954	+	protein_coding
ENST00000252445.7_1	ELOF1-201	ENSG00000130165.10_3	ELOF1	chr19:11663858-11670051	-	protein_coding
ENST00000252456.6_1	CNN1-201	ENSG00000130176.7_2	CNN1	chr19:11649532-11661138	+	protein_coding
ENST00000252483.9_1	NECTIN2-201	ENSG00000130202.9_3	NECTIN2	chr19:45349783-45392485	+	protein_coding
ENST00000252485.8_1	NECTIN2-202	ENSG00000130202.9_3	NECTIN2	chr19:45349432-45382198	+	protein_coding
ENST00000252486.8_1	APOE-201	ENSG00000130203.9_3	APOE	chr19:45409011-45412650	+	protein_coding
ENST00000252490.5_2	APOC2-201	ENSG00000234906.9_3	APOC2	chr19:45449239-45452820	+	protein_coding
ENST00000252512.13_1	XPO7-201	ENSG00000130227.16_2	XPO7	chr8:21777182-21864096	+	protein_coding
ENST00000252530.9_2	FAM98C-201	ENSG00000130244.12_3	FAM98C	chr19:38893775-38899724	+	protein_coding
ENST00000252542.8_1	SAFB2-201	ENSG00000130254.11_3	SAFB2	chr19:5587010-5622991	-	protein_coding
ENST00000252575.10_1	NCAN-201	ENSG00000130287.13_2	NCAN	chr19:19322782-19363042	+	protein_coding
ENST00000252590.8_1	PLVAP-201	ENSG00000130300.8_2	PLVAP	chr19:17462257-17488159	-	protein_coding
ENST00000252593.6_1	BST2-201	ENSG00000130303.12_3	BST2	chr19:17513748-17516457	-	protein_coding
ENST00000252599.8_3	COLGALT1-201	ENSG00000130309.10_4	COLGALT1	chr19:17666403-17693968	+	protein_coding
ENST00000252602.1_3	MRPL34-201	ENSG00000130312.6_3	MRPL34	chr19:17416477-17417652	+	protein_coding
ENST00000252603.6_1	PGLS-201	ENSG00000130313.6_2	PGLS	chr19:17622438-17632097	+	protein_coding
ENST00000252622.14_1	LSM7-201	ENSG00000130332.14_3	LSM7	chr19:2321516-2328619	-	protein_coding
ENST00000252660.5_1	MAS1-201	ENSG00000130368.5_2	MAS1	chr6:160327722-160337562	+	protein_coding
ENST00000252674.8_2	MLLT1-201	ENSG00000130382.8_3	MLLT1	chr19:6210390-6279959	-	protein_coding
ENST00000252699.6_1	ACTN4-201	ENSG00000130402.11_3	ACTN4	chr19:39138310-39222223	+	protein_coding
ENST00000252711.6_1	NDUFA10-201	ENSG00000130414.11_2	NDUFA10	chr2:240896789-240964819	-	protein_coding
ENST00000252725.9_1	ARPC1B-201	ENSG00000130429.12_3	ARPC1B	chr7:98972298-98992424	+	protein_coding
ENST00000252744.5_1	ZSWIM6-201	ENSG00000130449.5_3	ZSWIM6	chr5:60628100-60841997	+	protein_coding
ENST00000252785.3_1	SCO2-201	ENSG00000130489.14_3	SCO2	chr22:50962025-50964033	-	protein_coding
ENST00000252799.3_1	ZNF747-201	ENSG00000169955.7_3	ZNF747	chr16:30541688-30546668	-	protein_coding
ENST00000252804.8_1	PXDN-201	ENSG00000130508.10_3	PXDN	chr2:1635659-1748278	-	protein_coding
ENST00000252809.3_1	GDF15-201	ENSG00000130513.6_3	GDF15	chr19:18496968-18499986	+	protein_coding
ENST00000252818.4_1	JUND-201	ENSG00000130522.5_3	JUND	chr19:18390570-18392432	-	protein_coding
ENST00000252891.8_1	NUMBL-201	ENSG00000105245.9_2	NUMBL	chr19:41171810-41196556	-	protein_coding
ENST00000252898.11_1	TNNI2-201	ENSG00000130598.15_2	TNNI2	chr11:1860927-1862910	+	protein_coding
ENST00000252934.9_1	ATXN10-201	ENSG00000130638.16_3	ATXN10	chr22:46067679-46241187	+	protein_coding
ENST00000252939.8_3	CALY-201	ENSG00000130643.8_3	CALY	chr10:135137576-135150411	-	protein_coding
ENST00000252971.10_1	MNX1-201	ENSG00000130675.14_3	MNX1	chr7:156797547-156803345	-	protein_coding
ENST00000252992.8_2	CEP85-201	ENSG00000130695.14_2	CEP85	chr1:26560693-26605299	+	protein_coding
ENST00000252996.8_1	TAF4-201	ENSG00000130699.18_3	TAF4	chr20:60549854-60640866	-	protein_coding
ENST00000252998.1_1	RBBP8NL-201	ENSG00000130701.3_2	RBBP8NL	chr20:60985293-61002589	-	protein_coding
ENST00000252999.7_1	LAMA5-201	ENSG00000130702.15_3	LAMA5	chr20:60884121-60942368	-	protein_coding
ENST00000253003.6_1	ADRM1-201	ENSG00000130706.12_3	ADRM1	chr20:60877952-60883916	+	protein_coding
ENST00000253008.2_1	PRDM12-201	ENSG00000130711.3_2	PRDM12	chr9:133539981-133558368	+	protein_coding
ENST00000253023.7_1	UBE2M-201	ENSG00000130725.7_2	UBE2M	chr19:59067079-59070327	-	protein_coding
ENST00000253024.9_1	TRIM28-201	ENSG00000130726.11_2	TRIM28	chr19:59055836-59062083	+	protein_coding
ENST00000253031.6_1	YIPF2-201	ENSG00000130733.10_2	YIPF2	chr19:11032861-11039357	-	protein_coding
ENST00000253039.8_1	EIF2S3-201	ENSG00000130741.10_2	EIF2S3	chrX:24072833-24096088	+	protein_coding
ENST00000253047.6_1	TMEM160-201	ENSG00000130748.6_2	TMEM160	chr19:47549165-47551888	-	protein_coding
ENST00000253048.9_1	ZC3H4-201	ENSG00000130749.9_2	ZC3H4	chr19:47567444-47617009	-	protein_coding
ENST00000253054.12_1	GMFG-201	ENSG00000130755.12_4	GMFG	chr19:39819005-39826668	-	protein_coding
ENST00000253055.7_1	MAP3K10-201	ENSG00000130758.7_3	MAP3K10	chr19:40697651-40721482	+	protein_coding
ENST00000253063.3_1	SESN2-201	ENSG00000130766.4_2	SESN2	chr1:28586038-28609002	+	protein_coding
ENST00000253083.8_1	HIP1R-201	ENSG00000130787.13_2	HIP1R	chr12:123319973-123347507	+	protein_coding
ENST00000253099.10_2	MRPL4-201	ENSG00000105364.13_3	MRPL4	chr19:10362643-10370721	+	protein_coding
ENST00000253108.8_1	EIF3G-201	ENSG00000130811.11_3	EIF3G	chr19:10225693-10230578	-	protein_coding
ENST00000253109.4_1	ANGPTL6-201	ENSG00000130812.10_2	ANGPTL6	chr19:10203017-10213472	-	protein_coding
ENST00000253122.9_1	SLC6A8-201	ENSG00000130821.15_4	SLC6A8	chrX:152953554-152962048	+	protein_coding
ENST00000253144.13_1	ZNF331-201	ENSG00000130844.16_3	ZNF331	chr19:54024278-54083523	+	protein_coding
ENST00000253188.8_1	SLC7A10-201	ENSG00000130876.11_2	SLC7A10	chr19:33699570-33716756	-	protein_coding
ENST00000253237.9_1	GRWD1-201	ENSG00000105447.12_3	GRWD1	chr19:48949030-48960279	+	protein_coding
ENST00000253247.8_1	NOL11-201	ENSG00000130935.9_3	NOL11	chr17:65713949-65740647	+	protein_coding
ENST00000253251.12_1	UBE4B-201	ENSG00000130939.18_3	UBE4B	chr1:10092890-10240425	+	protein_coding
ENST00000253255.6_1	PKDREJ-201	ENSG00000130943.6_2	PKDREJ	chr22:46651560-46659252	-	protein_coding
ENST00000253270.11_1	SLC35D2-201	ENSG00000130958.11_2	SLC35D2	chr9:99082988-99145979	-	protein_coding
ENST00000253329.2_1	PPIL4-201	ENSG00000131013.3_2	PPIL4	chr6:149825869-149867174	-	protein_coding
ENST00000253413.9_1	ATP6V1E1-201	ENSG00000131100.12_2	ATP6V1E1	chr22:18074902-18111584	-	protein_coding
ENST00000253452.6_1	COX4I1-201	ENSG00000131143.8_3	COX4I1	chr16:85833290-85840608	+	protein_coding
ENST00000253457.7_1	EMC8-201	ENSG00000131148.8_3	EMC8	chr16:85812230-85833146	-	protein_coding
ENST00000253458.11_1	GSE1-201	ENSG00000131149.18_3	GSE1	chr16:85646822-85709810	+	protein_coding
ENST00000253577.7_1	ABCB7-201	ENSG00000131269.15_2	ABCB7	chrX:74273115-74376132	-	protein_coding
ENST00000253669.9_1	HAUS8-201	ENSG00000131351.14_2	HAUS8	chr19:17160539-17186423	-	protein_coding
ENST00000253673.5_1	ADGRE3-201	ENSG00000131355.14_3	ADGRE3	chr19:14730051-14785683	-	protein_coding
ENST00000253686.6_1	MRPS25-201	ENSG00000131368.7_2	MRPS25	chr3:15090025-15106842	-	protein_coding
ENST00000253692.11_2	TBC1D5-201	ENSG00000131374.14_3	TBC1D5	chr3:17198654-17782399	-	protein_coding
ENST00000253693.6_1	CAPN7-201	ENSG00000131375.9_2	CAPN7	chr3:15247750-15294425	+	protein_coding
ENST00000253699.7_1	RBSN-201	ENSG00000131381.12_3	RBSN	chr3:15111580-15140655	-	protein_coding
ENST00000253727.9_2	NR1H2-201	ENSG00000131408.13_4	NR1H2	chr19:50879726-50886239	+	protein_coding
ENST00000253754.7_1	PDLIM4-201	ENSG00000131435.12_2	PDLIM4	chr5:131593364-131609147	+	protein_coding
ENST00000253788.9_1	RPL27-201	ENSG00000131469.12_2	RPL27	chr17:41150451-41154976	+	protein_coding
ENST00000253794.6_1	VPS25-201	ENSG00000131475.6_2	VPS25	chr17:40925454-40931617	+	protein_coding
ENST00000253799.7_1	AOC2-201	ENSG00000131480.8_2	AOC2	chr17:40996617-41002724	+	protein_coding
ENST00000253811.10_1	DIAPH1-201	ENSG00000131504.15_2	DIAPH1	chr5:140894589-140998622	-	protein_coding
ENST00000253814.5_1	NDFIP1-201	ENSG00000131507.10_2	NDFIP1	chr5:141488070-141534008	+	protein_coding
ENST00000253861.4_1	EXOC4-201	ENSG00000131558.14_2	EXOC4	chr7:132937829-133750512	+	protein_coding
ENST00000253925.11_1	PPFIA1-201	ENSG00000131626.16_3	PPFIA1	chr11:70116806-70230506	+	protein_coding
ENST00000253928.13_1	FLYWCH1-201	ENSG00000059122.16_2	FLYWCH1	chr16:2961938-3001209	+	protein_coding
ENST00000254029.7_2	WDR44-201	ENSG00000131725.13_3	WDR44	chrX:117480072-117583924	+	protein_coding
ENST00000254037.6_1	ZCCHC9-201	ENSG00000131732.11_2	ZCCHC9	chr5:80597422-80609116	+	protein_coding
ENST00000254043.7_1	KRT15-201	ENSG00000171346.15_3	KRT15	chr17:39669995-39678665	-	protein_coding
ENST00000254051.10_1	TNS4-201	ENSG00000131746.12_2	TNS4	chr17:38632080-38657849	-	protein_coding
ENST00000254066.9_1	RARA-201	ENSG00000131759.17_3	RARA	chr17:38465446-38513048	+	protein_coding
ENST00000254079.8_1	PPP1R1B-201	ENSG00000131771.13_2	PPP1R1B	chr17:37783177-37792879	+	protein_coding
ENST00000254090.8_1	FMO5-201	ENSG00000131781.12_3	FMO5	chr1:146657838-146697230	-	protein_coding
ENST00000254101.3_1	PRKAB2-201	ENSG00000131791.7_2	PRKAB2	chr1:146626685-146644123	-	protein_coding
ENST00000254108.11_1	FUS-201	ENSG00000089280.18_2	FUS	chr16:31191431-31206192	+	protein_coding
ENST00000254190.3_1	CHSY1-201	ENSG00000131873.5_2	CHSY1	chr15:101715928-101792137	-	protein_coding
ENST00000254193.10_1	SNRPA1-201	ENSG00000131876.16_3	SNRPA1	chr15:101821715-101835456	-	protein_coding
ENST00000254250.7_1	THAP1-201	ENSG00000131931.8_3	THAP1	chr8:42691817-42698468	-	protein_coding
ENST00000254286.8_1	ACTR10-201	ENSG00000131966.13_3	ACTR10	chr14:58666856-58702354	+	protein_coding
ENST00000254301.13_1	LGALS3-201	ENSG00000131981.15_2	LGALS3	chr14:55595762-55612121	+	protein_coding
ENST00000254322.2_1	DNAJB1-201	ENSG00000132002.7_4	DNAJB1	chr19:14625582-14629232	-	protein_coding
ENST00000254323.6_1	ZSWIM4-201	ENSG00000132003.9_3	ZSWIM4	chr19:13906274-13943044	+	protein_coding
ENST00000254325.8_1	RFX1-201	ENSG00000132005.8_2	RFX1	chr19:14072350-14117097	-	protein_coding
ENST00000254337.10_1	DCAF15-201	ENSG00000132017.10_3	DCAF15	chr19:14063304-14072261	+	protein_coding
ENST00000254436.7_1	TRIM21-201	ENSG00000132109.9_2	TRIM21	chr11:4406132-4414926	-	protein_coding
ENST00000254442.7_1	WDR7-201	ENSG00000091157.13_3	WDR7	chr18:54318616-54703837	+	protein_coding
ENST00000254480.9_1	SMARCC1-201	ENSG00000173473.10_3	SMARCC1	chr3:47626762-47823407	-	protein_coding
ENST00000254488.6_1	SLC6A11-201	ENSG00000132164.9_2	SLC6A11	chr3:10857885-10982419	+	protein_coding
ENST00000254508.6_1	NUP210-201	ENSG00000132182.11_2	NUP210	chr3:13357735-13461809	-	protein_coding
ENST00000254528.3_1	EMILIN2-201	ENSG00000132205.10_2	EMILIN2	chr18:2847028-2915991	+	protein_coding
ENST00000254579.10_1	DNHD1-201	ENSG00000179532.12_3	DNHD1	chr11:6518526-6593252	+	protein_coding
ENST00000254584.6_1	ARFIP2-201	ENSG00000132254.12_2	ARFIP2	chr11:6496910-6502542	-	protein_coding
ENST00000254605.10_1	RRP8-201	ENSG00000132275.10_2	RRP8	chr11:6616305-6624850	-	protein_coding
ENST00000254616.10_1	TIMM10B-201	ENSG00000132286.11_3	TIMM10B	chr11:6502677-6505909	+	protein_coding
ENST00000254624.9_3	EFR3A-201	ENSG00000132294.14_3	EFR3A	chr8:132916335-133025889	+	protein_coding
ENST00000254630.11_2	PTCD3-201	ENSG00000132300.18_2	PTCD3	chr2:86333305-86369280	+	protein_coding
ENST00000254657.7_1	PER2-201	ENSG00000132326.11_3	PER2	chr2:239152679-239197250	-	protein_coding
ENST00000254667.7_1	PTPRE-201	ENSG00000132334.16_3	PTPRE	chr10:129705325-129884119	+	protein_coding
ENST00000254691.9_2	CARD6-201	ENSG00000132357.13_2	CARD6	chr5:40841286-40855456	+	protein_coding
ENST00000254695.12_1	RAP1GAP2-201	ENSG00000132359.14_3	RAP1GAP2	chr17:2699732-2941033	+	protein_coding
ENST00000254718.8_1	MYBBP1A-201	ENSG00000132382.14_3	MYBBP1A	chr17:4442197-4458926	-	protein_coding
ENST00000254719.9_1	RPA1-201	ENSG00000132383.11_2	RPA1	chr17:1733278-1802848	+	protein_coding
ENST00000254722.8_1	SERPINF1-201	ENSG00000132386.10_2	SERPINF1	chr17:1665253-1680868	+	protein_coding
ENST00000254730.10_1	EEFSEC-201	ENSG00000132394.10_2	EEFSEC	chr3:127872297-128127489	+	protein_coding
ENST00000254742.6_1	TMEM128-201	ENSG00000132406.11_2	TMEM128	chr4:4237269-4249939	-	protein_coding
ENST00000254799.10_1	GRSF1-201	ENSG00000132463.13_3	GRSF1	chr4:71681499-71705662	-	protein_coding
ENST00000254801.8_1	JCHAIN-201	ENSG00000132465.10_3	JCHAIN	chr4:71521258-71532377	-	protein_coding
ENST00000254803.3_1	UTP3-201	ENSG00000132467.3_2	UTP3	chr4:71554196-71556268	+	protein_coding
ENST00000254806.7_2	WBP2-201	ENSG00000132471.11_3	WBP2	chr17:73841780-73851501	-	protein_coding
ENST00000254810.8_2	H3F3B-201	ENSG00000132475.10_3	H3F3B	chr17:73772515-73775860	-	protein_coding
ENST00000254821.10_1	ZRANB2-201	ENSG00000132485.13_3	ZRANB2	chr1:71529020-71546694	-	protein_coding
ENST00000254835.2	ANKRD20A3-001	ENSG00000132498.7	ANKRD20A3	chr9:43089972-43133544	-	protein_coding
ENST00000254846.9_1	KDM6B-201	ENSG00000132510.10_2	KDM6B	chr17:7743222-7758114	+	protein_coding
ENST00000254850.11_3	ASGR2-201	ENSG00000161944.16_3	ASGR2	chr17:7004641-7018142	-	protein_coding
ENST00000254868.8_2	CLEC10A-201	ENSG00000132514.13_3	CLEC10A	chr17:6977856-6983626	-	protein_coding
ENST00000254908.10_1	PCBD2-201	ENSG00000132570.14_3	PCBD2	chr5:134240596-134296967	+	protein_coding
ENST00000254928.9_1	ERAL1-201	ENSG00000132591.11_2	ERAL1	chr17:27181956-27188085	+	protein_coding
ENST00000254940.9_1	NIP7-201	ENSG00000132603.13_3	NIP7	chr16:69373333-69377014	+	protein_coding
ENST00000254942.7_1	TERF2-201	ENSG00000132604.10_3	TERF2	chr16:69389464-69419891	-	protein_coding
ENST00000254950.12_1	VPS4A-201	ENSG00000132612.15_3	VPS4A	chr16:69345259-69360842	+	protein_coding
ENST00000254963.6_1	HSPA12B-201	ENSG00000132622.10_2	HSPA12B	chr20:3713314-3733758	+	protein_coding
ENST00000254998.2_1	NXT1-201	ENSG00000132661.3_3	NXT1	chr20:23331373-23335414	+	protein_coding
ENST00000255006.10_1	RIN2-201	ENSG00000132669.12_3	RIN2	chr20:19867165-19983101	+	protein_coding
ENST00000255078.7_1	IGHMBP2-201	ENSG00000132740.8_2	IGHMBP2	chr11:68671310-68708067	+	protein_coding
ENST00000255082.7_1	ACY3-201	ENSG00000132744.7_2	ACY3	chr11:67410026-67418130	-	protein_coding
ENST00000255152.2_1	ZSWIM3-201	ENSG00000132801.6_2	ZSWIM3	chr20:44486256-44507761	+	protein_coding
ENST00000255174.2_1	OSER1-201	ENSG00000132823.10_2	OSER1	chr20:42825136-42839431	-	protein_coding
ENST00000255194.10_2	AP3B1-201	ENSG00000132842.13_3	AP3B1	chr5:77296349-77590579	-	protein_coding
ENST00000255198.2_3	ZBED3-201	ENSG00000132846.5_4	ZBED3	chr5:76367897-76383148	-	protein_coding
ENST00000255283.9_1	ATP8A2-201	ENSG00000132932.16_2	ATP8A2	chr13:26043159-26594425	+	protein_coding
ENST00000255304.8_1	USPL1-201	ENSG00000132952.11_2	USPL1	chr13:31191920-31233686	+	protein_coding
ENST00000255305.10_3	XPO4-201	ENSG00000132953.16_3	XPO4	chr13:21351468-21476949	-	protein_coding
ENST00000255389.9_1	PEMT-201	ENSG00000133027.17_2	PEMT	chr17:17408877-17495014	-	protein_coding
ENST00000255390.9_1	SCO1-201	ENSG00000133028.10_2	SCO1	chr17:10575791-10600885	-	protein_coding
ENST00000255409.7_1	CHI3L1-201	ENSG00000133048.12_2	CHI3L1	chr1:203148059-203155877	-	protein_coding
ENST00000255559.7_1	SLC39A11-201	ENSG00000133195.11_3	SLC39A11	chr17:70642088-71088832	-	protein_coding
ENST00000255608.8_1	BTBD2-201	ENSG00000133243.8_3	BTBD2	chr19:1985437-2015723	-	protein_coding
ENST00000255613.7_1	KMT5C-201	ENSG00000133247.13_3	KMT5C	chr19:55851221-55859488	+	protein_coding
ENST00000255616.8_1	ZNF414-201	ENSG00000133250.13_2	ZNF414	chr19:8576219-8579032	-	protein_coding
ENST00000255631.9_1	HSPBP1-201	ENSG00000133265.10_3	HSPBP1	chr19:55773599-55791728	-	protein_coding
ENST00000255641.12_1	CSNK1G2-201	ENSG00000133275.15_1	CSNK1G2	chr19:1941148-1981337	+	protein_coding
ENST00000255684.9_1	LGALS12-201	ENSG00000133317.14_2	LGALS12	chr11:63273556-63284239	+	protein_coding
ENST00000255688.7_1	RARRES3-201	ENSG00000133321.10_2	RARRES3	chr11:63304293-63313934	+	protein_coding
ENST00000255759.10_1	FOPNL-201	ENSG00000133393.12_2	FOPNL	chr16:15959577-15982472	-	protein_coding
ENST00000255764.3_1	MED10-201	ENSG00000133398.3_2	MED10	chr5:6371994-6378707	-	protein_coding
ENST00000255784.5_1	CCDC134-201	ENSG00000100147.13_2	CCDC134	chr22:42196683-42222303	+	protein_coding
ENST00000255882.10_2	PI4KA-201	ENSG00000241973.10_3	PI4KA	chr22:21061979-21213100	-	protein_coding
ENST00000255945.3_1	GIMAP4-201	ENSG00000133574.9_2	GIMAP4	chr7:150264365-150271043	+	protein_coding
ENST00000255977.6_3	MKRN1-201	ENSG00000133606.10_4	MKRN1	chr7:140152840-140179369	-	protein_coding
ENST00000256001.12_1	ACTR3B-201	ENSG00000133627.17_2	ACTR3B	chr7:152456834-152552463	+	protein_coding
ENST00000256010.6_1	NTS-201	ENSG00000133636.10_2	NTS	chr12:86268075-86276770	+	protein_coding
ENST00000256015.4_1	BTG1-201	ENSG00000133639.4_3	BTG1	chr12:92534054-92539673	-	protein_coding
ENST00000256062.9_2	TMTC1-201	ENSG00000133687.15_4	TMTC1	chr12:29653773-29937692	-	protein_coding
ENST00000256079.8_1	IPO8-201	ENSG00000133704.9_3	IPO8	chr12:30781922-30848920	-	protein_coding
ENST00000256104.4_1	FABP4-201	ENSG00000170323.8_2	FABP4	chr8:82390654-82395498	-	protein_coding
ENST00000256108.9_1	IMPA1-201	ENSG00000133731.9_2	IMPA1	chr8:82570196-82598928	-	protein_coding
ENST00000256186.2_1	MICALCL-201	ENSG00000133808.4_3	MICALCL	chr11:12308447-12380691	+	protein_coding
ENST00000256190.12_1	SBF2-201	ENSG00000133812.15_3	SBF2	chr11:9800214-10315754	-	protein_coding
ENST00000256196.8_1	RRAS2-201	ENSG00000133818.13_3	RRAS2	chr11:14300296-14380730	-	protein_coding
ENST00000256255.10_2	SARAF-201	ENSG00000133872.13_4	SARAF	chr8:29920528-29940723	-	protein_coding
ENST00000256257.1_1	RNF122-201	ENSG00000133874.1_2	RNF122	chr8:33405273-33424643	-	protein_coding
ENST00000256319.6_1	ERG28-201	ENSG00000133935.6_3	ERG28	chr14:76116134-76127532	-	protein_coding
ENST00000256324.14_1	C14orf159-201	ENSG00000133943.20_3	C14orf159	chr14:91580407-91691976	+	protein_coding
ENST00000256343.7_3	CATSPERB-201	ENSG00000133962.7_4	CATSPERB	chr14:92047118-92198430	-	protein_coding
ENST00000256366.5_1	SYNJ2BP-201	ENSG00000213463.4_3	SYNJ2BP	chr14:70833213-70883762	-	protein_coding
ENST00000256367.2_1	TTC9-201	ENSG00000133985.2_2	TTC9	chr14:71108504-71142077	+	protein_coding
ENST00000256379.9_1	MED6-201	ENSG00000133997.11_3	MED6	chr14:71050306-71067384	-	protein_coding
ENST00000256383.8_1	EIF2S1-201	ENSG00000134001.12_3	EIF2S1	chr14:67826714-67853233	+	protein_coding
ENST00000256398.12_1	ELP3-201	ENSG00000134014.16_3	ELP3	chr8:27950355-28048673	+	protein_coding
ENST00000256413.7_2	CTIF-201	ENSG00000134030.13_3	CTIF	chr18:46065417-46389588	+	protein_coding
ENST00000256429.7_1	MBD2-201	ENSG00000134046.11_2	MBD2	chr18:51677971-51751158	-	protein_coding
ENST00000256433.5_2	IER3IP1-201	ENSG00000134049.5_3	IER3IP1	chr18:44679205-44702745	-	protein_coding
ENST00000256442.9_1	CCNB1-201	ENSG00000134057.14_3	CCNB1	chr5:68462837-68474072	+	protein_coding
ENST00000256443.7_1	CDK7-201	ENSG00000134058.11_3	CDK7	chr5:68530700-68573257	+	protein_coding
ENST00000256447.5_2	CD180-201	ENSG00000134061.5_2	CD180	chr5:66475441-66492627	-	protein_coding
ENST00000256458.4_1	IRAK2-201	ENSG00000134070.4_3	IRAK2	chr3:10206549-10285427	+	protein_coding
ENST00000256460.7_1	CAMK1-201	ENSG00000134072.10_2	CAMK1	chr3:9799026-9811661	-	protein_coding
ENST00000256474.2_1	VHL-201	ENSG00000134086.7_2	VHL	chr3:10182692-10193904	+	protein_coding
ENST00000256495.3_1	BHLHE40-201	ENSG00000134107.4_2	BHLHE40	chr3:5020801-5027008	+	protein_coding
ENST00000256496.7_1	ARL8B-201	ENSG00000134108.12_2	ARL8B	chr3:5163905-5222596	+	protein_coding
ENST00000256497.8_1	EDEM1-201	ENSG00000134109.10_2	EDEM1	chr3:5229358-5261642	+	protein_coding
ENST00000256544.7_2	KATNBL1-201	ENSG00000134152.10_3	KATNBL1	chr15:34432875-34502280	-	protein_coding
ENST00000256545.8_1	EMC7-201	ENSG00000134153.9_4	EMC7	chr15:34376218-34394149	-	protein_coding
ENST00000256578.7_1	AMPD2-201	ENSG00000116337.15_4	AMPD2	chr1:110163276-110174673	+	protein_coding
ENST00000256593.7_1	GSTM5-201	ENSG00000134201.10_3	GSTM5	chr1:110254877-110260888	+	protein_coding
ENST00000256594.7_1	GSTM3-201	ENSG00000134202.10_2	GSTM3	chr1:110276554-110283138	-	protein_coding
ENST00000256637.7_3	SORT1-201	ENSG00000134243.11_3	SORT1	chr1:109852192-109940573	-	protein_coding
ENST00000256644.8_1	LAMTOR5-201	ENSG00000134248.13_2	LAMTOR5	chr1:110943875-110950564	-	protein_coding
ENST00000256646.6_1	NOTCH2-201	ENSG00000134250.19_3	NOTCH2	chr1:120454176-120612240	-	protein_coding
ENST00000256678.12_1	PPHLN1-201	ENSG00000134283.17_3	PPHLN1	chr12:42719969-42840967	+	protein_coding
ENST00000256682.8_1	ARF3-201	ENSG00000134287.9_3	ARF3	chr12:49329506-49351334	-	protein_coding
ENST00000256686.10_1	TMEM106C-201	ENSG00000134291.11_2	TMEM106C	chr12:48357367-48362632	+	protein_coding
ENST00000256689.9_1	SLC38A2-201	ENSG00000134294.13_2	SLC38A2	chr12:46751972-46766650	-	protein_coding
ENST00000256707.7_2	KIDINS220-201	ENSG00000134313.15_3	KIDINS220	chr2:8868987-8977755	-	protein_coding
ENST00000256722.9_3	CMPK2-201	ENSG00000134326.11_4	CMPK2	chr2:6988447-7005827	-	protein_coding
ENST00000256759.7_1	FST-201	ENSG00000134363.11_2	FST	chr5:52776239-52782964	+	protein_coding
ENST00000256854.9_1	NARS-201	ENSG00000134440.11_3	NARS	chr18:55267888-55289405	-	protein_coding
ENST00000256897.8_1	CCNH-201	ENSG00000134480.13_2	CCNH	chr5:86690082-86708836	-	protein_coding
ENST00000256925.11_1	CABLES1-201	ENSG00000134508.12_3	CABLES1	chr18:20715727-20840431	+	protein_coding
ENST00000256935.12_1	DOCK2-201	ENSG00000134516.15_3	DOCK2	chr5:169064251-169510386	+	protein_coding
ENST00000256969.6_1	SPX-201	ENSG00000134548.9_2	SPX	chr12:21679241-21685881	+	protein_coding
ENST00000256997.7_1	ACP2-201	ENSG00000134575.9_2	ACP2	chr11:47260853-47270457	-	protein_coding
ENST00000257013.8_1	RTL8C-201	ENSG00000134590.13_3	RTL8C	chrX:134166396-134167576	+	protein_coding
ENST00000257017.4_1	RAB33A-201	ENSG00000134594.4_2	RAB33A	chrX:129305623-129318844	+	protein_coding
ENST00000257075.9_1	PUM1-201	ENSG00000134644.15_2	PUM1	chr1:31404353-31538545	-	protein_coding
ENST00000257100.7_1	SPOCD1-201	ENSG00000134668.12_3	SPOCD1	chr1:32256023-32281623	-	protein_coding
ENST00000257118.5_1	PHC2-201	ENSG00000134686.18_3	PHC2	chr1:33789227-33841194	-	protein_coding
ENST00000257181.9_1	PRPF38A-201	ENSG00000134748.12_2	PRPF38A	chr1:52870236-52886511	+	protein_coding
ENST00000257215.9_1	DAGLA-201	ENSG00000134780.9_2	DAGLA	chr11:61447905-61514473	+	protein_coding
ENST00000257245.8_1	TIMM10-201	ENSG00000134809.8_2	TIMM10	chr11:57295936-57298238	-	protein_coding
ENST00000257287.4_1	CEP135-201	ENSG00000174799.10_2	CEP135	chr4:56815147-56899529	+	protein_coding
ENST00000257290.9_1	PDGFRA-201	ENSG00000134853.11_3	PDGFRA	chr4:55095264-55164414	+	protein_coding
ENST00000257347.8_1	CARS2-201	ENSG00000134905.16_3	CARS2	chr13:111293764-111358504	-	protein_coding
ENST00000257359.6_1	ADAMTS8-201	ENSG00000134917.9_2	ADAMTS8	chr11:130274820-130298888	-	protein_coding
ENST00000257430.8_1	APC-201	ENSG00000134982.16_3	APC	chr5:112073585-112181936	+	protein_coding
ENST00000257435.11_2	NREP-201	ENSG00000134986.13_4	NREP	chr5:111064993-111092955	-	protein_coding
ENST00000257468.11_2	UBQLN1-201	ENSG00000135018.13_2	UBQLN1	chr9:86276344-86322849	-	protein_coding
ENST00000257497.10_1	ANXA1-201	ENSG00000135046.13_3	ANXA1	chr9:75766673-75785309	+	protein_coding
ENST00000257527.8_2	ADAM19-201	ENSG00000135074.15_3	ADAM19	chr5:156904312-157002783	-	protein_coding
ENST00000257548.9_1	USP30-201	ENSG00000135093.12_2	USP30	chr12:109490391-109525831	+	protein_coding
ENST00000257552.6_1	MSI1-201	ENSG00000135097.6_2	MSI1	chr12:120779133-120806983	-	protein_coding
ENST00000257570.9_1	OASL-201	ENSG00000135114.12_2	OASL	chr12:121456914-121477045	-	protein_coding
ENST00000257575.8_1	RNFT2-201	ENSG00000135119.14_3	RNFT2	chr12:117176096-117289567	+	protein_coding
ENST00000257600.3_1	DTX1-201	ENSG00000135144.7_2	DTX1	chr12:113495495-113535833	+	protein_coding
ENST00000257604.9_3	TRAFD1-201	ENSG00000135148.11_3	TRAFD1	chr12:112563349-112591407	+	protein_coding
ENST00000257626.11_2	GSAP-201	ENSG00000186088.15_2	GSAP	chr7:76940068-77045717	-	protein_coding
ENST00000257637.7_1	TMEM243-201	ENSG00000135185.11_3	TMEM243	chr7:86825476-86849049	-	protein_coding
ENST00000257663.3_1	TMEM60-201	ENSG00000135211.5_2	TMEM60	chr7:77423045-77427897	-	protein_coding
ENST00000257696.4_1	HILPDA-201	ENSG00000135245.9_3	HILPDA	chr7:128095945-128098470	+	protein_coding
ENST00000257700.6_1	RINT1-201	ENSG00000135249.7_2	RINT1	chr7:105172532-105208124	+	protein_coding
ENST00000257724.7_1	MDFIC-201	ENSG00000135272.10_3	MDFIC	chr7:114562209-114659256	+	protein_coding
ENST00000257749.8_2	BACH2-201	ENSG00000112182.14_3	BACH2	chr6:90636248-91006461	-	protein_coding
ENST00000257787.5_1	AKIRIN2-201	ENSG00000135334.8_2	AKIRIN2	chr6:88384790-88411927	-	protein_coding
ENST00000257818.2_1	LMO2-201	ENSG00000135363.11_2	LMO2	chr11:33880122-33913836	-	protein_coding
ENST00000257829.7_1	NAT10-201	ENSG00000135372.8_2	NAT10	chr11:34127149-34168457	+	protein_coding
ENST00000257836.3_1	PRRG4-201	ENSG00000135378.3_2	PRRG4	chr11:32851489-32879669	+	protein_coding
ENST00000257857.8_1	CD63-201	ENSG00000135404.11_2	CD63	chr12:56119271-56123004	-	protein_coding
ENST00000257879.10_1	ITGA7-201	ENSG00000135424.15_3	ITGA7	chr12:56078352-56101682	-	protein_coding
ENST00000257897.7_3	AGAP2-201	ENSG00000135439.11_4	AGAP2	chr12:58117544-58135940	-	protein_coding
ENST00000257904.10_1	CDK4-201	ENSG00000135446.16_3	CDK4	chr12:58141510-58146304	-	protein_coding
ENST00000257915.9_1	TFCP2-201	ENSG00000135457.9_3	TFCP2	chr12:51487446-51566664	-	protein_coding
ENST00000257963.8_1	ACVR1B-201	ENSG00000135503.12_3	ACVR1B	chr12:52345451-52390862	+	protein_coding
ENST00000257966.12_1	OS9-201	ENSG00000135506.15_3	OS9	chr12:58087928-58115338	+	protein_coding
ENST00000257974.2_1	KRT82-201	ENSG00000161850.2_2	KRT82	chr12:52787715-52800139	-	protein_coding
ENST00000257981.6_1	KCNH3-201	ENSG00000135519.6_2	KCNH3	chr12:49932940-49952091	+	protein_coding
ENST00000258052.7_1	SMPD2-201	ENSG00000135587.8_3	SMPD2	chr6:109761966-109765122	+	protein_coding
ENST00000258080.7_1	HTRA2-201	ENSG00000115317.11_2	HTRA2	chr2:74756504-74760475	+	protein_coding
ENST00000258091.9_1	CCT7-201	ENSG00000135624.15_2	CCT7	chr2:73461366-73480132	+	protein_coding
ENST00000258104.7_1	DYSF-201	ENSG00000135636.13_2	DYSF	chr2:71680852-71913898	+	protein_coding
ENST00000258105.7_1	MRPL53-201	ENSG00000204822.6_3	MRPL53	chr2:74699085-74700449	-	protein_coding
ENST00000258111.4_1	KCNMB4-201	ENSG00000135643.4_2	KCNMB4	chr12:70760056-70828072	+	protein_coding
ENST00000258145.7_1	GNS-201	ENSG00000135677.10_4	GNS	chr12:65107229-65153227	-	protein_coding
ENST00000258149.9_1	MDM2-202	ENSG00000135679.22_3	MDM2	chr12:69201956-69244466	+	protein_coding
ENST00000258169.8_1	MPHOSPH6-201	ENSG00000135698.9_2	MPHOSPH6	chr16:82181767-82203831	-	protein_coding
ENST00000258198.6_1	DYNC1LI2-201	ENSG00000135720.12_3	DYNC1LI2	chr16:66754796-66785701	-	protein_coding
ENST00000258200.7_1	FBXL8-201	ENSG00000135722.8_3	FBXL8	chr16:67193834-67198079	+	protein_coding
ENST00000258201.8_1	FHOD1-201	ENSG00000135723.13_3	FHOD1	chr16:67263292-67281561	-	protein_coding
ENST00000258229.13_3	PCNX2-201	ENSG00000135749.18_4	PCNX2	chr1:233119181-233431459	-	protein_coding
ENST00000258281.6_1	TAF5L-201	ENSG00000135801.9_2	TAF5L	chr1:229728868-229761794	-	protein_coding
ENST00000258301.5_1	STX6-201	ENSG00000135823.13_3	STX6	chr1:180941861-180992047	-	protein_coding
ENST00000258317.6_1	NPL-201	ENSG00000135838.13_2	NPL	chr1:182763485-182799519	+	protein_coding
ENST00000258341.4_1	LAMC1-201	ENSG00000135862.5_2	LAMC1	chr1:182992595-183114727	+	protein_coding
ENST00000258362.7_1	PNKD-202	ENSG00000127838.13_2	PNKD	chr2:219187896-219211514	+	protein_coding
ENST00000258381.10_2	SP110-201	ENSG00000135899.17_3	SP110	chr2:231033634-231084665	-	protein_coding
ENST00000258382.9_2	SP110-202	ENSG00000135899.17_3	SP110	chr2:231041191-231084827	-	protein_coding
ENST00000258383.3_1	MRPL44-201	ENSG00000135900.3_2	MRPL44	chr2:224822121-224832431	+	protein_coding
ENST00000258399.7_1	USP37-201	ENSG00000135913.10_2	USP37	chr2:219314974-219433084	-	protein_coding
ENST00000258411.7_1	WNT10A-201	ENSG00000135925.8_2	WNT10A	chr2:219745085-219758653	+	protein_coding
ENST00000258412.7_1	TMBIM1-201	ENSG00000135926.14_4	TMBIM1	chr2:219138915-219157300	-	protein_coding
ENST00000258416.7_3	EIF4E2-201	ENSG00000135930.13_4	EIF4E2	chr2:233414762-233433920	+	protein_coding
ENST00000258418.9_1	CAB39-201	ENSG00000135932.10_2	CAB39	chr2:231577560-231685790	+	protein_coding
ENST00000258424.2_1	COX5B-201	ENSG00000135940.6_2	COX5B	chr2:98262503-98264846	+	protein_coding
ENST00000258428.7_1	REV1-201	ENSG00000135945.9_2	REV1	chr2:100016938-100106497	-	protein_coding
ENST00000258436.9_1	MFSD9-201	ENSG00000135953.10_2	MFSD9	chr2:103332299-103353313	-	protein_coding
ENST00000258439.7_1	TMEM127-201	ENSG00000135956.8_2	TMEM127	chr2:96914254-96931732	-	protein_coding
ENST00000258455.7_1	MRPS9-201	ENSG00000135972.8_3	MRPS9	chr2:105654441-105716418	+	protein_coding
ENST00000258456.2_1	GPR45-201	ENSG00000135973.2_2	GPR45	chr2:105858200-105859506	+	protein_coding
ENST00000258457.6_1	C2orf49-201	ENSG00000135974.9_2	C2orf49	chr2:105953816-105965668	+	protein_coding
ENST00000258484.10_1	EPC2-201	ENSG00000135999.11_2	EPC2	chr2:149402553-149545137	+	protein_coding
ENST00000258526.8_1	PLXNC1-201	ENSG00000136040.8_2	PLXNC1	chr12:94542499-94701451	+	protein_coding
ENST00000258530.7_1	APPL2-201	ENSG00000136044.11_2	APPL2	chr12:105567074-105630016	-	protein_coding
ENST00000258534.12_1	DRAM1-201	ENSG00000136048.13_3	DRAM1	chr12:102271129-102317401	+	protein_coding
ENST00000258648.6_1	MED4-201	ENSG00000136146.14_3	MED4	chr13:48650092-48669240	-	protein_coding
ENST00000258672.9_1	SETDB2-201	ENSG00000136169.16_3	SETDB2	chr13:50018895-50059981	+	protein_coding
ENST00000258711.7_1	CHST12-201	ENSG00000136213.9_3	CHST12	chr7:2443223-2488118	+	protein_coding
ENST00000258729.7_1	IGF2BP3-201	ENSG00000136231.13_2	IGF2BP3	chr7:23349828-23510086	-	protein_coding
ENST00000258733.8_1	GPNMB-201	ENSG00000136235.15_3	GPNMB	chr7:23286182-23314727	+	protein_coding
ENST00000258739.8_1	KDELR2-201	ENSG00000136240.9_3	KDELR2	chr7:6500712-6523873	-	protein_coding
ENST00000258761.7_2	BZW2-201	ENSG00000136261.14_2	BZW2	chr7:16685756-16746148	+	protein_coding
ENST00000258770.7_1	TBRG4-201	ENSG00000136270.13_3	TBRG4	chr7:45139699-45151313	-	protein_coding
ENST00000258772.9_2	DDX56-201	ENSG00000136271.10_3	DDX56	chr7:44605016-44613601	-	protein_coding
ENST00000258774.9_1	HUS1-201	ENSG00000136273.11_3	HUS1	chr7:48002885-48019140	-	protein_coding
ENST00000258781.10_1	CCM2-201	ENSG00000136280.15_3	CCM2	chr7:45039784-45116066	+	protein_coding
ENST00000258787.11_1	MYO1G-201	ENSG00000136286.14_2	MYO1G	chr7:45002265-45018697	-	protein_coding
ENST00000258796.11_1	TTYH3-201	ENSG00000136295.14_2	TTYH3	chr7:2671585-2704436	+	protein_coding
ENST00000258821.7_1	TTC5-201	ENSG00000136319.11_3	TTC5	chr14:20754387-20774153	-	protein_coding
ENST00000258873.8_1	ACSBG1-201	ENSG00000103740.9_2	ACSBG1	chr15:78459810-78527049	-	protein_coding
ENST00000258874.3_1	MTHFS-201	ENSG00000136371.10_3	MTHFS	chr15:80137318-80189391	-	protein_coding
ENST00000258884.4_2	ABHD17C-201	ENSG00000136379.11_3	ABHD17C	chr15:80987644-81047962	+	protein_coding
ENST00000258886.12_1	IREB2-201	ENSG00000136381.12_2	IREB2	chr15:78730531-78793798	+	protein_coding
ENST00000258930.7_1	CIB2-201	ENSG00000136425.12_2	CIB2	chr15:78396948-78423886	-	protein_coding
ENST00000258947.7_4	CALCOCO2-201	ENSG00000136436.14_4	CALCOCO2	chr17:46908350-46942607	+	protein_coding
ENST00000258955.6_1	RSAD1-201	ENSG00000136444.9_3	RSAD1	chr17:48556161-48563336	+	protein_coding
ENST00000258962.4_1	SRSF1-201	ENSG00000136450.12_3	SRSF1	chr17:56082210-56084707	-	protein_coding
ENST00000258963.7_1	VEZF1-201	ENSG00000136451.8_3	VEZF1	chr17:56048908-56060225	-	protein_coding
ENST00000258975.6_1	TACO1-201	ENSG00000136463.7_2	TACO1	chr17:61678231-61685725	+	protein_coding
ENST00000258991.7_1	TEX2-201	ENSG00000136478.7_3	TEX2	chr17:62224587-62340587	-	protein_coding
ENST00000259006.7_2	LIMD2-201	ENSG00000136490.8_2	LIMD2	chr17:61773262-61777500	-	protein_coding
ENST00000259008.6_1	BRIP1-201	ENSG00000136492.8_2	BRIP1	chr17:59758627-59940882	-	protein_coding
ENST00000259021.8_1	KAT7-201	ENSG00000136504.11_3	KAT7	chr17:47865917-47912392	+	protein_coding
ENST00000259030.2_1	RTP4-201	ENSG00000136514.2_2	RTP4	chr3:187086120-187089864	+	protein_coding
ENST00000259037.7_1	NDUFB5-201	ENSG00000136521.12_4	NDUFB5	chr3:179322490-179342285	+	protein_coding
ENST00000259043.11_1	TRA2B-201	ENSG00000136527.17_2	TRA2B	chr3:185634943-185641681	-	protein_coding
ENST00000259050.8_1	MARCH7-201	ENSG00000136536.14_2	MARCH7	chr2:160569010-160627538	+	protein_coding
ENST00000259075.6_2	TANK-201	ENSG00000136560.13_3	TANK	chr2:161993419-162092698	+	protein_coding
ENST00000259089.8_1	BLK-201	ENSG00000136573.12_2	BLK	chr8:11351510-11422113	+	protein_coding
ENST00000259154.8_1	KCTD3-201	ENSG00000136636.12_3	KCTD3	chr1:215740735-215795149	+	protein_coding
ENST00000259199.8_3	CBWD2-201	ENSG00000136682.14_3	CBWD2	chr2:114195268-114253766	+	protein_coding
ENST00000259229.6_1	CCDC115-201	ENSG00000136710.9_2	CCDC115	chr2:131095814-131099922	-	protein_coding
ENST00000259238.8_2	BIN1-201	ENSG00000136717.14_3	BIN1	chr2:127805603-127864864	-	protein_coding
ENST00000259239.7_1	IMP4-201	ENSG00000136718.9_3	IMP4	chr2:131099798-131104197	+	protein_coding
ENST00000259241.6_1	HS6ST1-201	ENSG00000136720.6_2	HS6ST1	chr2:129023054-129076151	-	protein_coding
ENST00000259253.10_1	UGGT1-201	ENSG00000136731.12_2	UGGT1	chr2:128848885-128953251	+	protein_coding
ENST00000259254.8_1	GYPC-201	ENSG00000136732.14_3	GYPC	chr2:127413509-127454246	+	protein_coding
ENST00000259324.5_1	LRRC8A-201	ENSG00000136802.11_2	LRRC8A	chr9:131644781-131680313	+	protein_coding
ENST00000259335.8_1	KIAA0368-201	ENSG00000136813.14_4	KIAA0368	chr9:114122973-114247025	-	protein_coding
ENST00000259339.6_1	TOR1B-201	ENSG00000136816.15_2	TOR1B	chr9:132565432-132573560	+	protein_coding
ENST00000259351.9_1	RALGPS1-201	ENSG00000136828.18_3	RALGPS1	chr9:129677053-129985443	+	protein_coding
ENST00000259365.8_1	TMOD1-201	ENSG00000136842.13_2	TMOD1	chr9:100263921-100364030	+	protein_coding
ENST00000259392.7_1	SLC31A2-201	ENSG00000136867.10_2	SLC31A2	chr9:115913222-115926417	+	protein_coding
ENST00000259400.10_2	STX17-201	ENSG00000136874.10_3	STX17	chr9:102668915-102732623	+	protein_coding
ENST00000259455.3_1	GABBR2-201	ENSG00000136928.6_3	GABBR2	chr9:101050364-101471479	-	protein_coding
ENST00000259457.7_1	PSMB7-201	ENSG00000136930.12_2	PSMB7	chr9:127115745-127177718	-	protein_coding
ENST00000259467.8_1	PDCL-201	ENSG00000136940.13_2	PDCL	chr9:125580623-125590910	-	protein_coding
ENST00000259477.6_1	ARPC5L-201	ENSG00000136950.13_2	ARPC5L	chr9:127631484-127639996	+	protein_coding
ENST00000259512.8_1	DERL1-201	ENSG00000136986.9_2	DERL1	chr8:124025404-124054663	-	protein_coding
ENST00000259569.5_1	RANBP6-201	ENSG00000137040.9_3	RANBP6	chr9:6011043-6015618	-	protein_coding
ENST00000259607.6_3	CCL21-201	ENSG00000137077.7_3	CCL21	chr9:34709002-34710121	-	protein_coding
ENST00000259608.7_1	SIT1-201	ENSG00000137078.8_2	SIT1	chr9:35649292-35650937	-	protein_coding
ENST00000259622.10_2	DMRT2-201	ENSG00000173253.15_2	DMRT2	chr9:1051614-1057552	+	protein_coding
ENST00000259632.11_3	DCTN3-201	ENSG00000137100.15_3	DCTN3	chr9:34613548-34620477	-	protein_coding
ENST00000259667.5_1	HINT2-201	ENSG00000137133.10_2	HINT2	chr9:35812957-35815018	-	protein_coding
ENST00000259727.4_1	GMPR-201	ENSG00000137198.9_2	GMPR	chr6:16238811-16295780	+	protein_coding
ENST00000259746.13_1	TMEM63B-201	ENSG00000137216.18_2	TMEM63B	chr6:44094651-44123256	+	protein_coding
ENST00000259806.1_1	FOXF2-201	ENSG00000137273.3_2	FOXF2	chr6:1390069-1395832	+	protein_coding
ENST00000259808.8_1	RIPK1-201	ENSG00000137275.13_2	RIPK1	chr6:3068658-3115419	+	protein_coding
ENST00000259873.4_1	MRPS18B-206	ENSG00000204568.11_2	MRPS18B	chr6:30585486-30594172	+	protein_coding
ENST00000259874.5_1	IER3-201	ENSG00000137331.11_2	IER3	chr6:30710976-30712331	-	protein_coding
ENST00000259895.8_1	GTF2H4-201	ENSG00000213780.10_3	GTF2H4	chr6:30875961-30881883	+	protein_coding
ENST00000259939.3_1	RNF144B-201	ENSG00000137393.9_2	RNF144B	chr6:18387581-18469105	+	protein_coding
ENST00000259951.11_1	HLA-F-216	ENSG00000204642.13_3	HLA-F	chr6:29691056-29695073	+	protein_coding
ENST00000259953.8_2	NRM-201	ENSG00000137404.14_3	NRM	chr6:30655824-30659197	-	protein_coding
ENST00000259963.3_1	FAM8A1-201	ENSG00000137414.5_2	FAM8A1	chr6:17600586-17611950	+	protein_coding
ENST00000259989.6_1	FGFBP2-201	ENSG00000137441.7_3	FGFBP2	chr4:15961866-15964859	-	protein_coding
ENST00000260010.6_1	TLR2-201	ENSG00000137462.6_2	TLR2	chr4:154622652-154626851	+	protein_coding
ENST00000260045.7_1	THAP12-201	ENSG00000137492.7_3	THAP12	chr11:76061000-76091986	-	protein_coding
ENST00000260056.6_1	RAB30-201	ENSG00000137502.9_3	RAB30	chr11:82692832-82745611	-	protein_coding
ENST00000260061.9_1	LRRC32-201	ENSG00000137507.11_3	LRRC32	chr11:76368568-76381791	-	protein_coding
ENST00000260102.8_1	MRPL15-201	ENSG00000137547.8_3	MRPL15	chr8:55047770-55060461	+	protein_coding
ENST00000260128.8_1	SULF1-201	ENSG00000137573.13_3	SULF1	chr8:70378859-70573147	+	protein_coding
ENST00000260129.5_1	TGS1-201	ENSG00000137574.10_2	TGS1	chr8:56685701-56738005	+	protein_coding
ENST00000260130.8_1	SDCBP-201	ENSG00000137575.11_2	SDCBP	chr8:59465728-59495419	+	protein_coding
ENST00000260184.11_1	DDX60L-201	ENSG00000181381.13_3	DDX60L	chr4:169277886-169401638	-	protein_coding
ENST00000260197.11_1	SORL1-201	ENSG00000137642.12_2	SORL1	chr11:121322912-121504402	+	protein_coding
ENST00000260210.4_1	BUD13-201	ENSG00000137656.11_3	BUD13	chr11:116618886-116643704	-	protein_coding
ENST00000260227.4_1	MMP7-201	ENSG00000137673.8_2	MMP7	chr11:102391239-102401484	-	protein_coding
ENST00000260247.9_1	DCUN1D5-201	ENSG00000137692.11_2	DCUN1D5	chr11:102932808-102962944	-	protein_coding
ENST00000260270.2_1	FDX1-201	ENSG00000137714.2_2	FDX1	chr11:110300607-110335605	+	protein_coding
ENST00000260324.11_1	SQOR-201	ENSG00000137767.13_4	SQOR	chr15:45926938-45983492	+	protein_coding
ENST00000260327.8_1	CTDSPL2-201	ENSG00000137770.13_2	CTDSPL2	chr15:44719432-44821236	+	protein_coding
ENST00000260356.5_1	THBS1-201	ENSG00000137801.10_3	THBS1	chr15:39873294-39891667	+	protein_coding
ENST00000260359.10_1	NUSAP1-201	ENSG00000137804.12_3	NUSAP1	chr15:41624892-41673248	+	protein_coding
ENST00000260363.8_1	KIF23-201	ENSG00000137807.13_2	KIF23	chr15:69706585-69740756	+	protein_coding
ENST00000260364.9_1	NOX5-201	ENSG00000255346.9_4	NOX5	chr15:69222864-69355083	+	protein_coding
ENST00000260372.7_1	HAUS2-201	ENSG00000137814.10_2	HAUS2	chr15:42841008-42862192	+	protein_coding
ENST00000260379.10_1	RPLP1-201	ENSG00000137818.11_2	RPLP1	chr15:69745123-69748533	+	protein_coding
ENST00000260385.10_1	RMDN3-201	ENSG00000137824.15_3	RMDN3	chr15:41028082-41048049	-	protein_coding
ENST00000260386.6_1	ITPKA-201	ENSG00000137825.10_3	ITPKA	chr15:41786073-41795749	+	protein_coding
ENST00000260402.7_1	PLCB2-201	ENSG00000137841.11_3	PLCB2	chr15:40580108-40600123	-	protein_coding
ENST00000260403.6_1	TMEM62-201	ENSG00000137842.6_3	TMEM62	chr15:43425722-43477344	+	protein_coding
ENST00000260408.7_1	ADAM10-201	ENSG00000137845.14_3	ADAM10	chr15:58881006-59042177	-	protein_coding
ENST00000260443.8_1	RSL24D1-201	ENSG00000137876.9_2	RSL24D1	chr15:55473004-55489265	-	protein_coding
ENST00000260447.5_1	GCHFR-201	ENSG00000137880.5_2	GCHFR	chr15:41056218-41059908	+	protein_coding
ENST00000260453.3_1	MNS1-201	ENSG00000138587.5_2	MNS1	chr15:56720929-56757335	-	protein_coding
ENST00000260506.12_1	FNBP1L-201	ENSG00000137942.16_2	FNBP1L	chr1:93913688-94020216	+	protein_coding
ENST00000260508.8_1	KYAT3-201	ENSG00000137944.17_3	KYAT3	chr1:89401499-89458604	-	protein_coding
ENST00000260526.10_1	ARHGAP29-201	ENSG00000137962.12_2	ARHGAP29	chr1:94637307-94703121	-	protein_coding
ENST00000260600.9_2	ADCY3-201	ENSG00000138031.14_3	ADCY3	chr2:25042038-25142708	-	protein_coding
ENST00000260605.12_1	DYNC2LI1-201	ENSG00000138036.18_2	DYNC2LI1	chr2:44001178-44037149	+	protein_coding
ENST00000260641.9_1	ACTR2-201	ENSG00000138071.13_3	ACTR2	chr2:65454887-65498387	+	protein_coding
ENST00000260643.6_1	PREB-201	ENSG00000138073.13_3	PREB	chr2:27353624-27357543	-	protein_coding
ENST00000260653.4_1	SIX3-201	ENSG00000138083.4_2	SIX3	chr2:45169037-45173216	+	protein_coding
ENST00000260665.11_1	LRPPRC-201	ENSG00000138095.18_2	LRPPRC	chr2:44113647-44223144	-	protein_coding
ENST00000260731.4_1	KIF11-201	ENSG00000138160.5_2	KIF11	chr10:94353043-94415152	+	protein_coding
ENST00000260743.9_1	CALHM2-201	ENSG00000138172.10_2	CALHM2	chr10:105206546-105212075	-	protein_coding
ENST00000260746.5_1	ARL3-201	ENSG00000138175.8_2	ARL3	chr10:104433488-104474164	-	protein_coding
ENST00000260762.10_1	EXOC6-201	ENSG00000138190.16_3	EXOC6	chr10:94608277-94819247	+	protein_coding
ENST00000260803.8_1	DBR1-201	ENSG00000138231.12_2	DBR1	chr3:137879854-137893791	-	protein_coding
ENST00000260810.9_1	TOPBP1-201	ENSG00000163781.12_3	TOPBP1	chr3:133319417-133380737	-	protein_coding
ENST00000260818.10_1	DNAJC13-201	ENSG00000138246.15_3	DNAJC13	chr3:132136370-132257876	+	protein_coding
ENST00000260908.11_1	SLFN12L-201	ENSG00000205045.8_3	SLFN12L	chr17:33800708-33814876	-	protein_coding
ENST00000260947.8_1	BARD1-201	ENSG00000138376.10_3	BARD1	chr2:215590370-215674428	-	protein_coding
ENST00000260952.8_2	ASNSD1-201	ENSG00000138381.9_3	ASNSD1	chr2:190526146-190535557	+	protein_coding
ENST00000260953.9_1	METTL5-201	ENSG00000138382.14_3	METTL5	chr2:170668267-170681424	-	protein_coding
ENST00000260956.8_1	SSB-201	ENSG00000138385.15_2	SSB	chr2:170655322-170668574	+	protein_coding
ENST00000260970.7_1	PPIG-201	ENSG00000138398.15_3	PPIG	chr2:170440850-170497916	+	protein_coding
ENST00000261015.4_1	WDR12-201	ENSG00000138442.9_2	WDR12	chr2:203739505-203776949	-	protein_coding
ENST00000261016.10_1	ABI2-201	ENSG00000138443.15_3	ABI2	chr2:204192962-204296895	+	protein_coding
ENST00000261017.9_2	ABI2-202	ENSG00000138443.15_3	ABI2	chr2:204193003-204296896	+	protein_coding
ENST00000261023.7_2	ITGAV-201	ENSG00000138448.11_3	ITGAV	chr2:187454792-187545628	+	protein_coding
ENST00000261024.6_1	SLC40A1-201	ENSG00000138449.10_3	SLC40A1	chr2:190425305-190445613	-	protein_coding
ENST00000261037.7_1	COL8A1-201	ENSG00000144810.15_2	COL8A1	chr3:99357319-99518070	+	protein_coding
ENST00000261038.5_1	DIRC2-201	ENSG00000138463.8_2	DIRC2	chr3:122513642-122599986	+	protein_coding
ENST00000261070.6_1	COX17-201	ENSG00000138495.6_3	COX17	chr3:119388118-119396250	-	protein_coding
ENST00000261167.6_1	WBP11-201	ENSG00000084463.7_2	WBP11	chr12:14937513-14956474	-	protein_coding
ENST00000261168.8_1	ATF7IP-201	ENSG00000171681.12_3	ATF7IP	chr12:14518566-14655869	+	protein_coding
ENST00000261182.12_1	NAP1L1-201	ENSG00000187109.13_3	NAP1L1	chr12:76438682-76478738	-	protein_coding
ENST00000261187.8_1	SLC16A7-201	ENSG00000118596.11_3	SLC16A7	chr12:60083118-60183636	+	protein_coding
ENST00000261191.11_1	INTS13-201	ENSG00000064102.14_2	INTS13	chr12:27058114-27091254	-	protein_coding
ENST00000261192.11_1	BCAT1-201	ENSG00000060982.14_2	BCAT1	chr12:24962956-25102393	-	protein_coding
ENST00000261207.9_2	PPP1R12A-201	ENSG00000058272.16_3	PPP1R12A	chr12:80167343-80329235	-	protein_coding
ENST00000261208.7_1	HAL-201	ENSG00000084110.10_2	HAL	chr12:96366440-96390143	-	protein_coding
ENST00000261210.9_1	TMPO-201	ENSG00000120802.13_3	TMPO	chr12:98909630-98931491	+	protein_coding
ENST00000261211.7_1	CDK17-201	ENSG00000059758.7_3	CDK17	chr12:96672039-96794338	-	protein_coding
ENST00000261226.8_1	TMCC3-201	ENSG00000057704.12_3	TMCC3	chr12:94960900-95044338	-	protein_coding
ENST00000261233.8_1	IRAK3-201	ENSG00000090376.10_3	IRAK3	chr12:66582659-66648402	+	protein_coding
ENST00000261244.9_1	KIAA0586-201	ENSG00000100578.14_4	KIAA0586	chr14:58894708-59014763	+	protein_coding
ENST00000261245.8_1	MNAT1-201	ENSG00000020426.10_3	MNAT1	chr14:61201480-61436671	+	protein_coding
ENST00000261247.13_1	JKAMP-201	ENSG00000050130.17_2	JKAMP	chr14:59951161-59971433	+	protein_coding
ENST00000261249.6_1	TRMT5-201	ENSG00000126814.6_3	TRMT5	chr14:61438169-61448076	-	protein_coding
ENST00000261250.7_1	C12orf4-201	ENSG00000047621.11_3	C12orf4	chr12:4596894-4647637	-	protein_coding
ENST00000261254.7_1	CCND2-201	ENSG00000118971.7_3	CCND2	chr12:4382938-4414516	+	protein_coding
ENST00000261263.4_1	RAB21-201	ENSG00000080371.5_2	RAB21	chr12:72148654-72194065	+	protein_coding
ENST00000261267.6_1	LYZ-201	ENSG00000090382.6_2	LYZ	chr12:69742121-69748014	+	protein_coding
ENST00000261303.12_1	PSMC1-201	ENSG00000100764.13_3	PSMC1	chr14:90722839-90741773	+	protein_coding
ENST00000261304.6_1	GALC-201	ENSG00000054983.16_3	GALC	chr14:88399358-88459615	-	protein_coding
ENST00000261313.2_1	PEBP1-201	ENSG00000089220.4_2	PEBP1	chr12:118573663-118583389	+	protein_coding
ENST00000261318.4_1	C12orf49-201	ENSG00000111412.5_2	C12orf49	chr12:117147990-117175866	-	protein_coding
ENST00000261332.10_1	ZNF24-201	ENSG00000172466.15_3	ZNF24	chr18:32912176-32924420	-	protein_coding
ENST00000261340.11_1	CLEC2D-202	ENSG00000069493.14_3	CLEC2D	chr12:9822309-9847725	+	protein_coding
ENST00000261353.8_1	YPEL5-201	ENSG00000119801.12_2	YPEL5	chr2:30369827-30383399	+	protein_coding
ENST00000261369.8_1	SNX24-201	ENSG00000064652.10_2	SNX24	chr5:122181144-122344907	+	protein_coding
ENST00000261377.10_1	REXO5-201	ENSG00000005189.19_3	REXO5	chr16:20817821-20860990	+	protein_coding
ENST00000261381.6_1	XYLT1-201	ENSG00000103489.11_3	XYLT1	chr16:17195626-17564738	-	protein_coding
ENST00000261388.7_2	TMEM159-202	ENSG00000011638.10_3	TMEM159	chr16:21170000-21191930	+	protein_coding
ENST00000261396.5_1	NUP133-201	ENSG00000069248.11_2	NUP133	chr1:229576007-229644088	-	protein_coding
ENST00000261401.7_1	CORO1C-201	ENSG00000110880.10_3	CORO1C	chr12:109038885-109125372	-	protein_coding
ENST00000261402.6_1	NUAK1-201	ENSG00000074590.13_3	NUAK1	chr12:106457118-106533811	-	protein_coding
ENST00000261405.9_1	VWF-201	ENSG00000110799.13_2	VWF	chr12:6058040-6233841	-	protein_coding
ENST00000261413.9_1	MRPS27-201	ENSG00000113048.16_2	MRPS27	chr5:71515236-71616088	-	protein_coding
ENST00000261416.11_1	HEXB-201	ENSG00000049860.13_3	HEXB	chr5:73980969-74017113	+	protein_coding
ENST00000261425.7_2	KLHL5-201	ENSG00000109790.16_2	KLHL5	chr4:39046659-39123829	+	protein_coding
ENST00000261426.9_1	KLHL5-202	ENSG00000109790.16_2	KLHL5	chr4:39064060-39123826	+	protein_coding
ENST00000261427.9_1	UBE2K-201	ENSG00000078140.13_3	UBE2K	chr4:39699664-39784412	+	protein_coding
ENST00000261438.9_1	KLF3-201	ENSG00000109787.12_2	KLF3	chr4:38665817-38702663	+	protein_coding
ENST00000261439.8_1	TBC1D1-201	ENSG00000065882.15_3	TBC1D1	chr4:37892708-38140794	+	protein_coding
ENST00000261441.9_2	RSBN1-201	ENSG00000081019.13_2	RSBN1	chr1:114304454-114355098	-	protein_coding
ENST00000261461.6_2	PPP2R5A-201	ENSG00000066027.11_3	PPP2R5A	chr1:212458879-212535205	+	protein_coding
ENST00000261464.9_1	TRAF5-201	ENSG00000082512.14_2	TRAF5	chr1:211500179-211548288	+	protein_coding
ENST00000261475.9_1	PPP2R3C-201	ENSG00000092020.10_3	PPP2R3C	chr14:35554673-35591519	-	protein_coding
ENST00000261479.8_1	PSMA6-201	ENSG00000100902.10_3	PSMA6	chr14:35761563-35786680	+	protein_coding
ENST00000261483.4_1	MAN2A1-201	ENSG00000112893.9_2	MAN2A1	chr5:109025067-109202879	+	protein_coding
ENST00000261488.10_1	ENOX1-201	ENSG00000120658.13_3	ENOX1	chr13:43787654-44361044	-	protein_coding
ENST00000261489.6_3	TSC22D1-201	ENSG00000102804.14_4	TSC22D1	chr13:45006279-45010981	-	protein_coding
ENST00000261491.9_1	DGKH-201	ENSG00000102780.16_3	DGKH	chr13:42622889-42817032	+	protein_coding
ENST00000261497.8_1	USP22-201	ENSG00000124422.11_2	USP22	chr17:20902906-20946352	-	protein_coding
ENST00000261507.10_1	MSMO1-201	ENSG00000052802.12_3	MSMO1	chr4:166248775-166264312	+	protein_coding
ENST00000261509.10_1	PALLD-201	ENSG00000129116.17_3	PALLD	chr4:169418217-169849608	+	protein_coding
ENST00000261517.9_1	VPS13C-202	ENSG00000129003.15_3	VPS13C	chr15:62144592-62352647	-	protein_coding
ENST00000261520.8_1	ICE2-201	ENSG00000128915.11_4	ICE2	chr15:60711808-60771344	-	protein_coding
ENST00000261530.11_1	GPATCH2L-201	ENSG00000089916.17_4	GPATCH2L	chr14:76618279-76680686	+	protein_coding
ENST00000261531.11_1	SNW1-201	ENSG00000100603.13_2	SNW1	chr14:78183942-78227533	-	protein_coding
ENST00000261537.6_1	MIB1-201	ENSG00000101752.11_2	MIB1	chr18:19321281-19450918	+	protein_coding
ENST00000261556.10_1	TMEM260-201	ENSG00000070269.13_3	TMEM260	chr14:57046511-57116233	+	protein_coding
ENST00000261558.7_1	AP5M1-201	ENSG00000053770.11_3	AP5M1	chr14:57735627-57765460	+	protein_coding
ENST00000261560.9_1	ZNF430-201	ENSG00000118620.12_3	ZNF430	chr19:21203426-21242856	+	protein_coding
ENST00000261569.11_1	MAST4-201	ENSG00000069020.18_3	MAST4	chr5:66300448-66462879	+	protein_coding
ENST00000261574.9_1	IPO5-201	ENSG00000065150.18_3	IPO5	chr13:98605929-98676551	+	protein_coding
ENST00000261584.8_2	PALB2-201	ENSG00000083093.9_2	PALB2	chr16:23614491-23652631	-	protein_coding
ENST00000261588.8_3	KIAA0556-201	ENSG00000047578.12_4	KIAA0556	chr16:27561473-27791690	+	protein_coding
ENST00000261593.7_1	RNF138-202	ENSG00000134758.13_3	RNF138	chr18:29671818-29711524	+	protein_coding
ENST00000261596.8_1	LPIN2-201	ENSG00000101577.9_3	LPIN2	chr18:2916992-3011945	-	protein_coding
ENST00000261601.7_1	USP14-201	ENSG00000101557.14_3	USP14	chr18:158608-214629	+	protein_coding
ENST00000261609.11_1	HERC2-201	ENSG00000128731.15_3	HERC2	chr15:28356186-28567298	-	protein_coding
ENST00000261622.4_1	SLC7A5-201	ENSG00000103257.8_2	SLC7A5	chr16:87863629-87903094	-	protein_coding
ENST00000261623.7_1	CYBA-201	ENSG00000051523.10_3	CYBA	chr16:88709691-88717560	-	protein_coding
ENST00000261636.12_1	ARL1-201	ENSG00000120805.13_3	ARL1	chr12:101786898-101801598	-	protein_coding
ENST00000261637.4_1	UTP20-201	ENSG00000120800.4_2	UTP20	chr12:101673887-101780394	+	protein_coding
ENST00000261643.7_1	COX10-201	ENSG00000006695.10_2	COX10	chr17:13972846-14111994	+	protein_coding
ENST00000261647.9_3	TTC19-201	ENSG00000011295.15_4	TTC19	chr17:15902694-15932226	+	protein_coding
ENST00000261652.6_1	TNFRSF13B-201	ENSG00000240505.8_3	TNFRSF13B	chr17:16842399-16875402	-	protein_coding
ENST00000261653.10_1	STX2-201	ENSG00000111450.13_3	STX2	chr12:131274145-131323811	-	protein_coding
ENST00000261658.6_1	BFAR-201	ENSG00000103429.10_2	BFAR	chr16:14726672-14763093	+	protein_coding
ENST00000261667.7_1	KPNA3-201	ENSG00000102753.9_3	KPNA3	chr13:50273443-50367057	-	protein_coding
ENST00000261674.8_1	SFSWAP-201	ENSG00000061936.9_3	SFSWAP	chr12:132195634-132284282	+	protein_coding
ENST00000261681.8_1	MPP5-201	ENSG00000072415.8_3	MPP5	chr14:67707826-67802536	+	protein_coding
ENST00000261692.6_1	CDK2AP1-201	ENSG00000111328.6_3	CDK2AP1	chr12:123745528-123756687	-	protein_coding
ENST00000261700.7_1	C14orf166-201	ENSG00000087302.8_2	C14orf166	chr14:52456193-52477409	+	protein_coding
ENST00000261707.7_2	SLC6A4-201	ENSG00000108576.9_2	SLC6A4	chr17:28521339-28562986	-	protein_coding
ENST00000261708.8_1	UTP6-201	ENSG00000108651.9_2	UTP6	chr17:30187918-30228784	-	protein_coding
ENST00000261712.7_1	PSMD11-201	ENSG00000108671.9_3	PSMD11	chr17:30771279-30810336	+	protein_coding
ENST00000261714.10_1	BLMH-201	ENSG00000108578.14_2	BLMH	chr17:28575213-28619012	-	protein_coding
ENST00000261716.7_1	TAOK1-201	ENSG00000160551.11_3	TAOK1	chr17:27717618-27878922	+	protein_coding
ENST00000261721.8_1	BTBD1-201	ENSG00000064726.9_3	BTBD1	chr15:83685174-83736106	-	protein_coding
ENST00000261726.10_1	CUX2-201	ENSG00000111249.13_2	CUX2	chr12:111471828-111788358	+	protein_coding
ENST00000261733.6_2	ALDH2-201	ENSG00000111275.12_3	ALDH2	chr12:112204726-112255333	+	protein_coding
ENST00000261735.3_1	ERP29-201	ENSG00000089248.6_3	ERP29	chr12:112451120-112461255	+	protein_coding
ENST00000261739.8_1	ANKRD13A-201	ENSG00000076513.16_3	ANKRD13A	chr12:110437328-110477568	+	protein_coding
ENST00000261741.9_1	RBM19-201	ENSG00000122965.10_3	RBM19	chr12:114259862-114404176	-	protein_coding
ENST00000261745.8_1	NAA25-201	ENSG00000111300.9_3	NAA25	chr12:112464493-112546826	-	protein_coding
ENST00000261749.10_1	ZFAND6-201	ENSG00000086666.18_3	ZFAND6	chr15:80351910-80430735	+	protein_coding
ENST00000261758.5_1	MESD-201	ENSG00000117899.10_4	MESD	chr15:81268088-81282219	-	protein_coding
ENST00000261769.9_1	CDH1-201	ENSG00000039068.18_3	CDH1	chr16:68771128-68869451	+	protein_coding
ENST00000261772.12_1	AARS-201	ENSG00000090861.15_3	AARS	chr16:70286198-70323446	-	protein_coding
ENST00000261776.9_1	VAC14-201	ENSG00000103043.14_3	VAC14	chr16:70721342-70835064	-	protein_coding
ENST00000261778.1_1	TANGO6-201	ENSG00000103047.7_3	TANGO6	chr16:68877509-69119083	+	protein_coding
ENST00000261783.3_1	ARG2-201	ENSG00000081181.7_2	ARG2	chr14:68086515-68118437	+	protein_coding
ENST00000261797.6_1	NDST1-201	ENSG00000070614.14_3	NDST1	chr5:149887674-149937773	+	protein_coding
ENST00000261798.9_1	CSNK1A1-201	ENSG00000113712.17_3	CSNK1A1	chr5:148871760-148930960	-	protein_coding
ENST00000261811.5_1	CYSTM1-201	ENSG00000120306.9_3	CYSTM1	chr5:139554227-139623374	+	protein_coding
ENST00000261813.8_1	PFDN1-201	ENSG00000113068.9_2	PFDN1	chr5:139624624-139682706	-	protein_coding
ENST00000261819.7_1	ANAPC5-201	ENSG00000089053.12_2	ANAPC5	chr12:121746160-121790265	-	protein_coding
ENST00000261822.4_1	BCL7A-201	ENSG00000110987.8_2	BCL7A	chr12:122459792-122498811	+	protein_coding
ENST00000261837.11_1	GNB5-201	ENSG00000069966.18_2	GNB5	chr15:52407302-52483566	-	protein_coding
ENST00000261842.9_1	AP4E1-201	ENSG00000081014.10_3	AP4E1	chr15:51200870-51298097	+	protein_coding
ENST00000261844.11_2	FAM214A-201	ENSG00000047346.12_3	FAM214A	chr15:52873518-52970820	-	protein_coding
ENST00000261845.6_1	MAPK6-201	ENSG00000069956.11_3	MAPK6	chr15:52311398-52359569	+	protein_coding
ENST00000261854.9_2	SPPL2A-201	ENSG00000138600.9_3	SPPL2A	chr15:50994463-51058005	-	protein_coding
ENST00000261858.6_1	GLCE-201	ENSG00000138604.9_3	GLCE	chr15:69452973-69564538	+	protein_coding
ENST00000261866.11_1	SPG11-201	ENSG00000104133.14_4	SPG11	chr15:44854894-44955862	-	protein_coding
ENST00000261868.9_1	EIF3J-201	ENSG00000104131.12_3	EIF3J	chr15:44829255-44855001	+	protein_coding
ENST00000261875.9_1	HACD3-201	ENSG00000074696.12_2	HACD3	chr15:65822804-65870690	+	protein_coding
ENST00000261879.9_1	APH1B-201	ENSG00000138613.13_3	APH1B	chr15:63569753-63601325	+	protein_coding
ENST00000261880.9_1	AAGAB-201	ENSG00000103591.12_2	AAGAB	chr15:67493371-67547074	-	protein_coding
ENST00000261881.8_1	TIPIN-201	ENSG00000075131.9_4	TIPIN	chr15:66628544-66649054	-	protein_coding
ENST00000261883.5_2	CILP-201	ENSG00000138615.5_3	CILP	chr15:65487096-65503826	-	protein_coding
ENST00000261884.7_1	TRIP4-201	ENSG00000103671.9_2	TRIP4	chr15:64680003-64747502	+	protein_coding
ENST00000261888.10_1	PARP16-201	ENSG00000138617.14_2	PARP16	chr15:65550432-65579210	-	protein_coding
ENST00000261889.9_1	SNX1-201	ENSG00000028528.14_3	SNX1	chr15:64388192-64432074	+	protein_coding
ENST00000261890.6_1	RAB11A-201	ENSG00000103769.9_3	RAB11A	chr15:66161796-66184329	+	protein_coding
ENST00000261893.8_1	LACTB-201	ENSG00000103642.11_3	LACTB	chr15:63413999-63434260	+	protein_coding
ENST00000261900.7_1	CCNT1-201	ENSG00000129315.10_2	CCNT1	chr12:49082247-49110681	-	protein_coding
ENST00000261917.3_1	HCN4-201	ENSG00000138622.3_2	HCN4	chr15:73612200-73661605	-	protein_coding
ENST00000261918.8_1	SEMA7A-201	ENSG00000138623.9_3	SEMA7A	chr15:74701630-74726808	-	protein_coding
ENST00000261942.6_1	FAF2-201	ENSG00000113194.12_3	FAF2	chr5:175875356-175937075	+	protein_coding
ENST00000261965.7_1	TUBGCP3-201	ENSG00000126216.13_3	TUBGCP3	chr13:113139319-113242481	-	protein_coding
ENST00000261973.11_1	RBM25-201	ENSG00000119707.13_3	RBM25	chr14:73525144-73590606	+	protein_coding
ENST00000261980.2_1	VSX2-201	ENSG00000119614.2_2	VSX2	chr14:74706175-74729441	+	protein_coding
ENST00000262013.11_1	SPAG9-201	ENSG00000008294.20_2	SPAG9	chr17:49039535-49198226	-	protein_coding
ENST00000262030.7_1	ATP5B-201	ENSG00000110955.8_3	ATP5B	chr12:57031963-57039852	-	protein_coding
ENST00000262031.9_2	RBMS2-201	ENSG00000076067.12_2	RBMS2	chr12:56915713-56989980	+	protein_coding
ENST00000262032.9_2	IKZF4-201	ENSG00000123411.14_3	IKZF4	chr12:56401443-56432219	+	protein_coding
ENST00000262033.10_1	PTGES3-201	ENSG00000110958.15_2	PTGES3	chr12:57057127-57082084	-	protein_coding
ENST00000262039.8_1	PIK3C3-201	ENSG00000078142.12_3	PIK3C3	chr18:39535171-39667794	+	protein_coding
ENST00000262043.7_1	PHF3-201	ENSG00000118482.11_2	PHF3	chr6:64345741-64425377	+	protein_coding
ENST00000262051.11_1	SLC11A2-201	ENSG00000110911.14_3	SLC11A2	chr12:51373318-51420142	-	protein_coding
ENST00000262053.7_1	ATF1-201	ENSG00000123268.8_3	ATF1	chr12:51158075-51214905	+	protein_coding
ENST00000262056.13_1	EIF4B-201	ENSG00000063046.17_3	EIF4B	chr12:53399942-53435993	+	protein_coding
ENST00000262059.8_1	CALCOCO1-201	ENSG00000012822.15_3	CALCOCO1	chr12:54102301-54121529	-	protein_coding
ENST00000262061.6_1	COPZ1-201	ENSG00000111481.9_4	COPZ1	chr12:54718911-54745633	+	protein_coding
ENST00000262065.7_1	MMD-201	ENSG00000108960.7_2	MMD	chr17:53469974-53499353	-	protein_coding
ENST00000262067.4_1	TSPAN13-201	ENSG00000106537.7_2	TSPAN13	chr7:16793160-16824161	+	protein_coding
ENST00000262093.9_1	FECH-201	ENSG00000066926.10_2	FECH	chr18:55215515-55254004	-	protein_coding
ENST00000262094.9_1	RAB27B-201	ENSG00000041353.9_3	RAB27B	chr18:52495430-52562747	+	protein_coding
ENST00000262096.12_1	ZDHHC2-201	ENSG00000104219.12_3	ZDHHC2	chr8:17013538-17082308	+	protein_coding
ENST00000262097.11_2	ASAH1-201	ENSG00000104763.18_3	ASAH1	chr8:17913925-17941879	-	protein_coding
ENST00000262105.6_1	MCM4-201	ENSG00000104738.16_3	MCM4	chr8:48873496-48890720	+	protein_coding
ENST00000262109.7_1	ERICH1-201	ENSG00000104714.13_3	ERICH1	chr8:614200-681239	-	protein_coding
ENST00000262113.8_1	MYOM2-201	ENSG00000036448.9_2	MYOM2	chr8:1993155-2093380	+	protein_coding
ENST00000262120.9_1	TWSG1-201	ENSG00000128791.11_2	TWSG1	chr18:9334765-9402418	+	protein_coding
ENST00000262124.15_1	SEH1L-201	ENSG00000085415.15_2	SEH1L	chr18:12947994-12987535	+	protein_coding
ENST00000262126.8_1	ANKRD12-201	ENSG00000101745.16_3	ANKRD12	chr18:9136775-9285983	+	protein_coding
ENST00000262127.6_1	CEP76-201	ENSG00000101624.10_3	CEP76	chr18:12672631-12702773	-	protein_coding
ENST00000262133.10_1	RBL2-201	ENSG00000103479.15_3	RBL2	chr16:53468332-53525561	+	protein_coding
ENST00000262134.9_1	LPCAT2-201	ENSG00000087253.12_3	LPCAT2	chr16:55542910-55620582	+	protein_coding
ENST00000262139.9_1	WIPI1-201	ENSG00000070540.12_2	WIPI1	chr17:66417423-66453562	-	protein_coding
ENST00000262144.10_1	WDR59-201	ENSG00000103091.14_3	WDR59	chr16:74905265-75019046	-	protein_coding
ENST00000262146.8_1	MTFR1-201	ENSG00000066855.15_2	MTFR1	chr8:66556974-66622791	+	protein_coding
ENST00000262158.6_1	SMAD7-201	ENSG00000101665.8_2	SMAD7	chr18:46446223-46477081	-	protein_coding
ENST00000262160.10_4	SMAD2-201	ENSG00000175387.15_4	SMAD2	chr18:45335328-45456930	-	protein_coding
ENST00000262177.8_1	DNAJB6-201	ENSG00000105993.14_4	DNAJB6	chr7:157129660-157210133	+	protein_coding
ENST00000262178.6_1	VIPR2-201	ENSG00000106018.13_2	VIPR2	chr7:158820866-158937649	-	protein_coding
ENST00000262187.9_1	RHEB-201	ENSG00000106615.9_2	RHEB	chr7:151163098-151217010	-	protein_coding
ENST00000262188.12_1	SMARCD3-201	ENSG00000082014.16_2	SMARCD3	chr7:150936059-150946059	-	protein_coding
ENST00000262193.6_1	PSMB1-201	ENSG00000008018.8_2	PSMB1	chr6:170844205-170862429	-	protein_coding
ENST00000262198.8_1	ADNP2-201	ENSG00000101544.8_2	ADNP2	chr18:77866915-77898234	+	protein_coding
ENST00000262209.4_1	TRPA1-201	ENSG00000104321.10_2	TRPA1	chr8:72933486-72987852	-	protein_coding
ENST00000262210.9_1	CSPP1-201	ENSG00000104218.14_3	CSPP1	chr8:67976603-68108498	+	protein_coding
ENST00000262213.6_1	TRAM1-201	ENSG00000067167.7_2	TRAM1	chr8:71485677-71520604	-	protein_coding
ENST00000262215.7_1	ARFGEF1-201	ENSG00000066777.8_3	ARFGEF1	chr8:68109884-68255912	-	protein_coding
ENST00000262225.7_1	TMED2-201	ENSG00000086598.10_2	TMED2	chr12:124069078-124083124	+	protein_coding
ENST00000262238.8_1	YY1-201	ENSG00000100811.12_3	YY1	chr14:100705322-100749129	+	protein_coding
ENST00000262241.6_1	RCOR1-201	ENSG00000089902.9_2	RCOR1	chr14:103058998-103196913	+	protein_coding
ENST00000262244.5_1	MOB3B-201	ENSG00000120162.9_2	MOB3B	chr9:27325207-27529779	-	protein_coding
ENST00000262259.6_1	ZNF175-201	ENSG00000105497.7_2	ZNF175	chr19:52074551-52095761	+	protein_coding
ENST00000262265.9_1	PIH1D1-201	ENSG00000104872.10_3	PIH1D1	chr19:49949556-49955067	-	protein_coding
ENST00000262288.7_1	SCPEP1-201	ENSG00000121064.12_3	SCPEP1	chr17:55055466-55084124	+	protein_coding
ENST00000262291.8_1	VMP1-201	ENSG00000062716.12_3	VMP1	chr17:57784826-57918453	+	protein_coding
ENST00000262294.11_1	TRIM37-201	ENSG00000108395.13_4	TRIM37	chr17:57075563-57184082	-	protein_coding
ENST00000262300.12_1	PKMYT1-201	ENSG00000127564.16_3	PKMYT1	chr16:3022792-3030540	-	protein_coding
ENST00000262301.15_1	LMF1-201	ENSG00000103227.18_3	LMF1	chr16:903634-1020999	-	protein_coding
ENST00000262302.13_1	NUBP2-201	ENSG00000095906.16_3	NUBP2	chr16:1832902-1839192	+	protein_coding
ENST00000262304.8_1	PKD1-201	ENSG00000008710.19_3	PKD1	chr16:2138711-2185899	-	protein_coding
ENST00000262305.8_3	RAB11FIP3-201	ENSG00000090565.15_4	RAB11FIP3	chr16:475619-573011	+	protein_coding
ENST00000262316.10_1	RHBDF1-201	ENSG00000007384.15_2	RHBDF1	chr16:108058-122629	-	protein_coding
ENST00000262319.10_1	TELO2-201	ENSG00000100726.14_2	TELO2	chr16:1543364-1560458	+	protein_coding
ENST00000262320.7_1	AXIN1-201	ENSG00000103126.14_2	AXIN1	chr16:337440-402659	-	protein_coding
ENST00000262346.6_1	ANKRD13C-201	ENSG00000118454.12_2	ANKRD13C	chr1:70726920-70820417	-	protein_coding
ENST00000262348.8_1	WLS-201	ENSG00000116729.13_3	WLS	chr1:68591041-68698236	-	protein_coding
ENST00000262366.7_1	GLIS2-201	ENSG00000126603.8_2	GLIS2	chr16:4364762-4389598	+	protein_coding
ENST00000262367.9_1	CREBBP-201	ENSG00000005339.14_3	CREBBP	chr16:3775055-3930727	-	protein_coding
ENST00000262370.11_1	MGRN1-201	ENSG00000102858.12_3	MGRN1	chr16:4674791-4740975	+	protein_coding
ENST00000262375.10_1	DNAJA3-201	ENSG00000103423.13_3	DNAJA3	chr16:4475806-4506776	+	protein_coding
ENST00000262376.10_1	UBN1-201	ENSG00000118900.14_3	UBN1	chr16:4897632-4932361	+	protein_coding
ENST00000262384.3_1	N4BP1-201	ENSG00000102921.7_3	N4BP1	chr16:48572637-48644120	-	protein_coding
ENST00000262394.6_2	WSB1-201	ENSG00000109046.14_2	WSB1	chr17:25621106-25642952	+	protein_coding
ENST00000262395.9_1	TRAF4-201	ENSG00000076604.14_3	TRAF4	chr17:27071002-27077976	+	protein_coding
ENST00000262407.5_1	ITGA2B-201	ENSG00000005961.17_3	ITGA2B	chr17:42449551-42466873	-	protein_coding
ENST00000262415.7_2	DHX8-201	ENSG00000067596.10_3	DHX8	chr17:41561334-41603038	+	protein_coding
ENST00000262418.10_1	SLC4A1-201	ENSG00000004939.13_2	SLC4A1	chr17:42325753-42345509	-	protein_coding
ENST00000262424.9_1	CRISPLD2-201	ENSG00000103196.11_3	CRISPLD2	chr16:84853590-84943116	+	protein_coding
ENST00000262426.5_1	FOXF1-201	ENSG00000103241.6_2	FOXF1	chr16:86544133-86549024	+	protein_coding
ENST00000262428.4_1	COTL1-201	ENSG00000103187.7_2	COTL1	chr16:84599200-84651683	-	protein_coding
ENST00000262430.5_1	MLYCD-201	ENSG00000103150.5_3	MLYCD	chr16:83932731-83960631	+	protein_coding
ENST00000262450.7_1	CHD5-201	ENSG00000116254.17_2	CHD5	chr1:6161853-6240183	-	protein_coding
ENST00000262455.6_1	ERP44-201	ENSG00000023318.7_3	ERP44	chr9:102741461-102861322	-	protein_coding
ENST00000262457.6_2	INVS-202	ENSG00000119509.12_3	INVS	chr9:102861538-103063282	+	protein_coding
ENST00000262461.6_1	SLC12A2-201	ENSG00000064651.13_3	SLC12A2	chr5:127419458-127525380	+	protein_coding
ENST00000262467.9_2	NLRP1-201	ENSG00000091592.15_3	NLRP1	chr17:5404705-5487851	-	protein_coding
ENST00000262482.10_2	RNF167-201	ENSG00000108523.15_3	RNF167	chr17:4843423-4848517	+	protein_coding
ENST00000262483.12_1	PITPNM3-201	ENSG00000091622.15_3	PITPNM3	chr17:6354585-6459814	-	protein_coding
ENST00000262493.11_3	GNAO1-201	ENSG00000087258.14_3	GNAO1	chr16:56225259-56391369	+	protein_coding
ENST00000262494.12_3	GNAO1-202	ENSG00000087258.14_3	GNAO1	chr16:56225695-56382111	+	protein_coding
ENST00000262506.7_1	CSNK2A2-201	ENSG00000070770.8_3	CSNK2A2	chr16:58191811-58231824	-	protein_coding
ENST00000262510.10_2	NLRC5-201	ENSG00000140853.15_3	NLRC5	chr16:57023410-57117436	+	protein_coding
ENST00000262518.8_1	SRCAP-201	ENSG00000080603.16_3	SRCAP	chr16:30710462-30752730	+	protein_coding
ENST00000262519.13_2	SETD1A-201	ENSG00000099381.17_2	SETD1A	chr16:30968615-30995985	+	protein_coding
ENST00000262525.5_1	ZNF629-201	ENSG00000102870.5_2	ZNF629	chr16:30789770-30798523	-	protein_coding
ENST00000262554.6_1	SPTLC1-201	ENSG00000090054.13_2	SPTLC1	chr9:94794281-94877658	-	protein_coding
ENST00000262570.9_2	CHCHD3-201	ENSG00000106554.12_3	CHCHD3	chr7:132469629-132766842	-	protein_coding
ENST00000262577.5_1	ZC3H3-201	ENSG00000014164.6_2	ZC3H3	chr8:144519825-144623623	-	protein_coding
ENST00000262580.8_1	GSDMD-201	ENSG00000104518.10_3	GSDMD	chr8:144640477-144645232	+	protein_coding
ENST00000262584.7_1	RPL8-201	ENSG00000161016.17_3	RPL8	chr8:146015155-146017972	-	protein_coding
ENST00000262585.6_3	DENND3-201	ENSG00000105339.10_3	DENND3	chr8:142138720-142205895	+	protein_coding
ENST00000262607.3_1	ADA2-201	ENSG00000093072.15_4	ADA2	chr22:17660196-17690779	-	protein_coding
ENST00000262613.9_1	SLC9A3R1-201	ENSG00000109062.11_3	SLC9A3R1	chr17:72744791-72765492	+	protein_coding
ENST00000262629.8_1	TYROBP-201	ENSG00000011600.11_2	TYROBP	chr19:36395312-36399197	-	protein_coding
ENST00000262631.10_2	SCN1B-201	ENSG00000105711.11_3	SCN1B	chr19:35521370-35531353	+	protein_coding
ENST00000262633.8_1	RBM42-201	ENSG00000126254.11_2	RBM42	chr19:36119951-36128588	+	protein_coding
ENST00000262640.11_1	VAMP7-201	ENSG00000124333.15_2	VAMP7	chrX:155111038-155173433	+	protein_coding
ENST00000262644.8_1	IMPAD1-201	ENSG00000104331.8_4	IMPAD1	chr8:57870492-57906403	-	protein_coding
ENST00000262646.11_1	RAB2A-201	ENSG00000104388.14_3	RAB2A	chr8:61429416-61536186	+	protein_coding
ENST00000262650.10_3	ITCH-201	ENSG00000078747.14_3	ITCH	chr20:32951118-33095840	+	protein_coding
ENST00000262662.5_1	CDKN2C-201	ENSG00000123080.10_2	CDKN2C	chr1:51426417-51440305	+	protein_coding
ENST00000262710.5_1	ACIN1-201	ENSG00000100813.14_3	ACIN1	chr14:23527776-23564823	-	protein_coding
ENST00000262713.6_1	AJUBA-201	ENSG00000129474.15_4	AJUBA	chr14:23440383-23451851	-	protein_coding
ENST00000262715.9_2	TEP1-201	ENSG00000129566.12_3	TEP1	chr14:20833826-20881580	-	protein_coding
ENST00000262719.9_1	PHLPP1-201	ENSG00000081913.13_3	PHLPP1	chr18:60382683-60647666	+	protein_coding
ENST00000262738.7_1	CELSR1-201	ENSG00000075275.16_3	CELSR1	chr22:46756731-46933067	-	protein_coding
ENST00000262741.9_2	PIK3R3-201	ENSG00000117461.14_3	PIK3R3	chr1:46505812-46598314	-	protein_coding
ENST00000262746.5_1	PRDX1-201	ENSG00000117450.13_2	PRDX1	chr1:45976708-45987610	-	protein_coding
ENST00000262764.10_1	PGS1-201	ENSG00000087157.18_2	PGS1	chr17:76374721-76420635	+	protein_coding
ENST00000262768.11_1	TIMP2-201	ENSG00000035862.12_3	TIMP2	chr17:76849059-76921469	-	protein_coding
ENST00000262776.7_1	LGALS3BP-201	ENSG00000108679.12_3	LGALS3BP	chr17:76967320-76976191	-	protein_coding
ENST00000262803.9_1	UPF1-201	ENSG00000005007.12_2	UPF1	chr19:18942747-18979045	+	protein_coding
ENST00000262805.16_1	PDE4C-201	ENSG00000105650.21_2	PDE4C	chr19:18321370-18337285	-	protein_coding
ENST00000262809.8_1	ELL-201	ENSG00000105656.12_3	ELL	chr19:18553473-18632937	-	protein_coding
ENST00000262811.10_1	MAST3-201	ENSG00000099308.10_3	MAST3	chr19:18208603-18262502	+	protein_coding
ENST00000262812.8_1	COPE-201	ENSG00000105669.13_3	COPE	chr19:19010323-19030206	-	protein_coding
ENST00000262815.12_2	MAU2-201	ENSG00000129933.20_3	MAU2	chr19:19431490-19469564	+	protein_coding
ENST00000262844.9_1	AMMECR1-201	ENSG00000101935.9_3	AMMECR1	chrX:109437414-109561467	-	protein_coding
ENST00000262848.5_1	PRKX-201	ENSG00000183943.5_2	PRKX	chrX:3522411-3631649	-	protein_coding
ENST00000262865.8_1	BPI-201	ENSG00000101425.12_2	BPI	chr20:36932525-36965907	+	protein_coding
ENST00000262866.8_1	SLA2-201	ENSG00000101082.13_2	SLA2	chr20:35240721-35274619	-	protein_coding
ENST00000262873.11_1	MYH7B-201	ENSG00000078814.15_3	MYH7B	chr20:33563206-33590240	+	protein_coding
ENST00000262878.4_1	SAMHD1-201	ENSG00000101347.8_2	SAMHD1	chr20:35518632-35580246	-	protein_coding
ENST00000262879.10_1	RALGAPB-201	ENSG00000170471.14_3	RALGAPB	chr20:37101459-37207504	+	protein_coding
ENST00000262887.9_1	XRCC1-201	ENSG00000073050.11_3	XRCC1	chr19:44047192-44080158	-	protein_coding
ENST00000262888.7_1	KCNN4-201	ENSG00000104783.11_2	KCNN4	chr19:44270685-44285409	-	protein_coding
ENST00000262894.10_1	ZNF225-201	ENSG00000256294.7_2	ZNF225	chr19:44617511-44638969	+	protein_coding
ENST00000262915.7_1	ST3GAL3-201	ENSG00000126091.19_3	ST3GAL3	chr1:44173204-44396837	+	protein_coding
ENST00000262919.9_1	ATRN-201	ENSG00000088812.17_3	ATRN	chr20:3451687-3631769	+	protein_coding
ENST00000262932.4_1	CNPY4-201	ENSG00000166997.7_3	CNPY4	chr7:99717236-99723134	+	protein_coding
ENST00000262940.7	RASA4-001	ENSG00000105808.13	RASA4	chr7:102220093-102257204	-	protein_coding
ENST00000262942.9_2	ARPC1A-201	ENSG00000241685.9_3	ARPC1A	chr7:98923533-98963880	+	protein_coding
ENST00000262947.7_1	MYDGF-201	ENSG00000074842.7_3	MYDGF	chr19:4657557-4670382	-	protein_coding
ENST00000262948.9_1	MAP2K2-201	ENSG00000126934.13_2	MAP2K2	chr19:4090319-4124126	-	protein_coding
ENST00000262949.7_1	HMG20B-201	ENSG00000064961.18_3	HMG20B	chr19:3572984-3577105	+	protein_coding
ENST00000262953.10_1	TLE2-201	ENSG00000065717.14_3	TLE2	chr19:2997636-3029165	-	protein_coding
ENST00000262958.3_1	GNA15-201	ENSG00000060558.3_2	GNA15	chr19:3136191-3163767	+	protein_coding
ENST00000262960.13_1	DPP9-201	ENSG00000142002.16_2	DPP9	chr19:4675238-4723875	-	protein_coding
ENST00000262962.11_1	CCDC94-201	ENSG00000105248.15_2	CCDC94	chr19:4247076-4269087	+	protein_coding
ENST00000262965.9_1	TCF3-201	ENSG00000071564.14_3	TCF3	chr19:1609289-1652328	-	protein_coding
ENST00000262970.9_1	ANKRD24-201	ENSG00000089847.12_3	ANKRD24	chr19:4198137-4224502	+	protein_coding
ENST00000262971.2_1	PIAS4-201	ENSG00000105229.6_2	PIAS4	chr19:4007644-4039384	+	protein_coding
ENST00000262982.2_1	CSE1L-201	ENSG00000124207.16_2	CSE1L	chr20:47662849-47713489	+	protein_coding
ENST00000262990.8_1	ZNF330-201	ENSG00000109445.10_3	ZNF330	chr4:142142041-142155851	+	protein_coding
ENST00000262995.8_1	GAB1-202	ENSG00000109458.8_3	GAB1	chr4:144257915-144395721	+	protein_coding
ENST00000262999.3_1	UCP1-201	ENSG00000109424.3_2	UCP1	chr4:141480588-141489959	-	protein_coding
ENST00000263025.8_2	MAPK3-201	ENSG00000102882.11_3	MAPK3	chr16:30125426-30134615	-	protein_coding
ENST00000263026.9_1	EEF2K-201	ENSG00000103319.11_2	EEF2K	chr16:22217603-22300053	+	protein_coding
ENST00000263033.9_1	SYTL4-201	ENSG00000102362.15_2	SYTL4	chrX:99930894-99987108	-	protein_coding
ENST00000263035.8_1	DHTKD1-201	ENSG00000181192.11_3	DHTKD1	chr10:12110971-12165224	+	protein_coding
ENST00000263038.8_3	PHYH-201	ENSG00000107537.13_3	PHYH	chr10:13319800-13342101	-	protein_coding
ENST00000263056.5_1	MAP3K8-201	ENSG00000107968.9_2	MAP3K8	chr10:30722866-30750761	+	protein_coding
ENST00000263063.8_1	MTPAP-201	ENSG00000107951.14_1	MTPAP	chr10:30598730-30638248	-	protein_coding
ENST00000263071.8_1	SCARF1-201	ENSG00000074660.15_4	SCARF1	chr17:1537152-1549041	-	protein_coding
ENST00000263073.10_1	SMG6-201	ENSG00000070366.13_3	SMG6	chr17:1963137-2207065	-	protein_coding
ENST00000263083.10_1	DPH1-201	ENSG00000108963.17_3	DPH1	chr17:1933404-1946724	+	protein_coding
ENST00000263092.10_1	METTL16-201	ENSG00000127804.12_3	METTL16	chr17:2319370-2415180	-	protein_coding
ENST00000263093.6_3	SLC27A5-201	ENSG00000083807.9_4	SLC27A5	chr19:59009704-59023432	-	protein_coding
ENST00000263094.10_1	ABCA7-201	ENSG00000064687.12_1	ABCA7	chr19:1040102-1065568	+	protein_coding
ENST00000263095.10_1	ZNF264-201	ENSG00000083844.10_4	ZNF264	chr19:57702868-57734214	+	protein_coding
ENST00000263097.8_1	CNN2-201	ENSG00000064666.14_3	CNN2	chr19:1026580-1039067	+	protein_coding
ENST00000263102.6_1	CCDC6-201	ENSG00000108091.10_2	CCDC6	chr10:61548521-61666414	-	protein_coding
ENST00000263121.11_1	SMARCB1-201	ENSG00000099956.18_4	SMARCB1	chr22:24129161-24176703	+	protein_coding
ENST00000263125.9_1	PRKCQ-201	ENSG00000065675.14_2	PRKCQ	chr10:6469105-6622263	-	protein_coding
ENST00000263168.3_1	CAPZA1-201	ENSG00000116489.12_2	CAPZA1	chr1:113161795-113214241	+	protein_coding
ENST00000263202.14_1	UFD1-201	ENSG00000070010.18_4	UFD1	chr22:19437433-19466738	-	protein_coding
ENST00000263205.11_1	MED15-201	ENSG00000099917.17_3	MED15	chr22:20861897-20941906	+	protein_coding
ENST00000263207.7_1	ARVCF-201	ENSG00000099889.13_2	ARVCF	chr22:19957419-20004331	-	protein_coding
ENST00000263208.5_1	HIRA-201	ENSG00000100084.14_3	HIRA	chr22:19318221-19419256	-	protein_coding
ENST00000263212.9_2	PPM1F-201	ENSG00000100034.13_3	PPM1F	chr22:22273793-22307209	-	protein_coding
ENST00000263228.3_1	UBE2R2-201	ENSG00000107341.4_2	UBE2R2	chr9:33817565-33920402	+	protein_coding
ENST00000263238.6_1	ACTR3-201	ENSG00000115091.11_3	ACTR3	chr2:114647537-114720173	+	protein_coding
ENST00000263239.6_1	DDX18-201	ENSG00000088205.12_2	DDX18	chr2:118572226-118589955	+	protein_coding
ENST00000263245.9_1	ARFGAP3-201	ENSG00000242247.10_3	ARFGAP3	chr22:43192508-43253408	-	protein_coding
ENST00000263246.7_1	PACSIN2-201	ENSG00000100266.18_3	PACSIN2	chr22:43265777-43411151	-	protein_coding
ENST00000263253.8_1	EP300-201	ENSG00000100393.12_3	EP300	chr22:41487790-41576083	+	protein_coding
ENST00000263256.6_1	DESI1-201	ENSG00000100418.7_2	DESI1	chr22:41994032-42017100	-	protein_coding
ENST00000263257.5_1	NOVA2-201	ENSG00000104967.6_3	NOVA2	chr19:46436992-46476804	-	protein_coding
ENST00000263265.10_1	PLEKHA4-201	ENSG00000105559.11_3	PLEKHA4	chr19:49340354-49371889	-	protein_coding
ENST00000263269.3_1	GRIN2D-201	ENSG00000105464.3_2	GRIN2D	chr19:48898132-48948188	+	protein_coding
ENST00000263270.10_1	AP2S1-201	ENSG00000042753.11_2	AP2S1	chr19:47341424-47354249	-	protein_coding
ENST00000263275.4_3	OPA3-201	ENSG00000125741.4_4	OPA3	chr19:46049539-46088077	-	protein_coding
ENST00000263277.7_1	EHD2-201	ENSG00000024422.11_3	EHD2	chr19:48216600-48246391	+	protein_coding
ENST00000263280.10_1	STRN4-201	ENSG00000090372.14_2	STRN4	chr19:47222764-47249737	-	protein_coding
ENST00000263334.9_1	PAX8-201	ENSG00000125618.16_2	PAX8	chr2:113973574-114036498	-	protein_coding
ENST00000263341.6_1	IL1B-201	ENSG00000125538.11_3	IL1B	chr2:113587328-113594480	-	protein_coding
ENST00000263346.12_1	TCF25-201	ENSG00000141002.19_3	TCF25	chr16:89940020-89977792	+	protein_coding
ENST00000263354.7_1	NAPA-201	ENSG00000105402.7_4	NAPA	chr19:47990894-48018497	-	protein_coding
ENST00000263360.10_1	EED-201	ENSG00000074266.19_3	EED	chr11:85955586-85989778	+	protein_coding
ENST00000263368.8_1	BLVRB-201	ENSG00000090013.9_2	BLVRB	chr19:40953696-40971747	-	protein_coding
ENST00000263370.2_1	ITPKC-201	ENSG00000086544.2_2	ITPKC	chr19:41223008-41246765	+	protein_coding
ENST00000263372.4_2	KCNK6-201	ENSG00000099337.4_2	KCNK6	chr19:38810484-38822716	+	protein_coding
ENST00000263377.6_1	BRD4-201	ENSG00000141867.17_4	BRD4	chr19:15346330-15391262	-	protein_coding
ENST00000263379.3_1	IL27RA-201	ENSG00000104998.3_2	IL27RA	chr19:14142560-14164028	+	protein_coding
ENST00000263381.11_1	WIZ-201	ENSG00000011451.17_3	WIZ	chr19:15530791-15560762	-	protein_coding
ENST00000263382.7_1	ASF1B-201	ENSG00000105011.8_2	ASF1B	chr19:14230321-14247768	-	protein_coding
ENST00000263384.11_1	FAM32A-201	ENSG00000105058.11_2	FAM32A	chr19:16296229-16302857	+	protein_coding
ENST00000263390.7_1	MED26-201	ENSG00000105085.10_3	MED26	chr19:16685730-16739017	-	protein_coding
ENST00000263398.10_1	CD44-201	ENSG00000026508.17_4	CD44	chr11:35160417-35253949	+	protein_coding
ENST00000263401.9_1	COMMD9-201	ENSG00000110442.11_2	COMMD9	chr11:36293842-36310979	-	protein_coding
ENST00000263409.8_1	LIFR-201	ENSG00000113594.9_2	LIFR	chr5:38475065-38595506	-	protein_coding
ENST00000263433.7_1	PPP1R12C-201	ENSG00000125503.12_2	PPP1R12C	chr19:55602281-55628927	-	protein_coding
ENST00000263441.11_1	DNAJC6-201	ENSG00000116675.15_2	DNAJC6	chr1:65730377-65881552	+	protein_coding
ENST00000263461.10_1	WDR11-201	ENSG00000120008.15_2	WDR11	chr10:122610687-122669036	+	protein_coding
ENST00000263464.7_1	BIRC3-201	ENSG00000023445.13_2	BIRC3	chr11:102188226-102208465	+	protein_coding
[truncated: 22,497 more rows]

## Sheet: proteins
Supplementary Table S1 List of quantitated 24,493 mRNAs and 592 proteins
Majority.protein.IDs	Gene.names	Number.of.proteins	Unique.peptides	Sequence.coverage....	MS.MS.count	Q.value	Score	iBAQ	Symbol	ENTREZID	Rank
A0A024QYT5;P05121;B7ZAB0;B7Z4X6;P05121-2	SERPINE1	5	2	4.7	3	0	15.326	1627900	SERPINE1	5054	617
A0A024QZL1;P10124	PRG1;SRGN	2	2	17.1	5	0	23.728	28015000	PRG1	5552	357
A0A024QZN4;V9HWK2;P18206-2;P18206;Q5JQ13;B4E3Q9;B3KXA2	VCL;HEL114	9	6	6.4	6	0	35.72	499660	VCL	7414	681
B2R4S9;A8K9J7;A0A024RCL8;A0A024RCJ9;A0A024RCJ2;A0A024QZZ7;I6L9F7;U3KQK0;B4DR52;Q99880;Q99879;Q99877;Q93079;Q8N257;Q5QNW6;Q16778;P62807;P58876;P57053;P33778;P23527;P06899;O60814;Q96A08;Q5QNW6-2;L0R4T3;Q0D2M2	HIST1H2BI;HIST1H2BK;HIST1H2BN;HIST1H2BJ;HIST1H2BD;HIST1H2BM;HIST1H2BL;HIST1H2BH;HIST3H2BB;HIST2H2BF;HIST2H2BE;HIST1H2BC;H2BFS;HIST1H2BB;HIST1H2BO;HIST1H2BA;ABCF2	27	3	22.2	6	0	29.47	25325000	HIST1H2BI	8339	368
C9J0D1;A3KPC7;A0A024RAS2;Q08AJ9;B2R5B6;B2R5B3;A4FTV9;A0A024R017;A0A0U1RR32;A0A0U1RRH7;Q71UI9-2;Q99878;Q96KK5;Q71UI9;P0C0S5;Q9BTM1;Q16777;Q93077;Q7L7L0;Q6FI13;P20671;P0C0S8;P04908;Q96QV6;P16104;Q9BTM1-2;V9GZN0;C9J386;H0YFX9;B4E0B3;Q71UI9-5;Q71UI9-3;Q71UI9-4;Q8IUE6	H2AFV;HIST1H2AH;H2AFJ;HIST1H2AB;HIST1H2AK;HIST1H2AC;HIST1H2AJ;H2AFZ;HIST2H2AC;HIST3H2A;HIST2H2AA3;HIST1H2AD;HIST1H2AG;HIST1H2AA;H2AFX;HIST2H2AB	34	2	13.1	3	0	12.14	19569000	H2AFV	85235	397
A0A024R035;P02748	C9	8	21	35.4	88	0	263.67	714560000	C9	735	96
A0A024R084;Q9BRK5;H0Y3T6;G3V1E2;A0A024R0A9;Q9BRK5-4;Q9BRK5-3;Q9BRK5-6;Q9BRK5-2	SDF4	10	7	20.4	9	0	57.835	10513000	SDF4	51150	454
H0Y612;E7EN20;A0A024R0F6;Q9UPN9-2;Q9UPN9	TRIM33	5	1	1	85	0.0086655	10.424	3650000000	TRIM33	51592	40
A0A024R0P8;P01137	TGFB1	16	6	17.7	10	0	57.896	25299000	TGFB1	7040	369
K7ERI9;A0A024R0T8;P02654;K7EJI9;K7ELM9;K7EPF9	APOC1	7	7	42.9	73	0	174.75	29200000000	APOC1	341	7
F8VXR5;F8VRQ0;F8VZ72;F8W1A2;B7Z4L8;F8VVB6;A0A024R0X1;B7Z625;Q99435-4;Q99435;Q99435-2;Q99435-3;B3KTI3	NELL2	13	2	19.1	4	0	13.274	8651200	NELL2	4753	471
A0A024R137;A0A024R102;H0YHV1;A8K9I5;F8VRQ4;Q96GM5-2;Q96GM5	SMARCD1	7	2	3.8	45	0.0088652	11.163	417440000	SMARCD1	6602	122
A0A024R1Q4;A0A024R1G8;O14791;O14791-2;U5LKM6;U5LKG0;U5LIH6;U5LIG7;U5LI90;U5LHF6;U5LH96;U5LH46;U5LGU2;O14791-3;U5LKT7;U5LKQ0;U5LKP5;U5LKJ0;U5LKH9;U5LIJ1;U5LIA9;U5LGY0	APOL1	28	4	34.7	65	0	323.31	789660000	A0A024R1Q4	8542	87
A0A024R1K7;Q04917;B2R6N6	YWHAH	5	2	12.6	1	0	31.196	1694500	YWHAH	7533	614
Q86XU5;A0A024R1N1;A0A0U4BW16;P35579	MYH9	12	3	2	3	0	18.251	218930	MYH9	4627	692
A2NWD3;A0A024R1R5;P01127-2;P01127;A9UJN9;A9UJP0	PDGFB	6	2	16.1	2	0	12.747	5303300	PDGFB	5155	515
B4DIC4;B4DJI4;A0A024R1S8;Q14847;Q14847-2;K7ESD6;F6S2S5;C9J9W2;A8K1D2	LASP1	9	2	15.2	4	0	12.422	6572500	LASP1	3927	493
A0A024R1U8;P22692;P22692-2	IGFBP4	3	9	44.2	47	0	149.64	481470000	IGFBP4	3487	117
A0A087WXM6;J3QQT2;J3QLC8;J3KRX5;A0A024R261;A0A0A0MRF8;A0A0A6YYL6;P18621-2;P18621;P18621-3	RPL17;hCG_24487;RPL17-C18orf32	10	1	8.3	2	0	25.428	18971000	RPL17	6139	402
A0A0S2Z3Q0;B3KUI5;A0A024R2X3;Q12794-7;Q12794-2;Q12794;A8K451;Q12794-3	HYAL1	9	4	11.6	6	0	59.912	11351000	HYAL1	3373	448
A0A024R319;P55268	LAMB2	3	4	2.6	4	0	23.956	887470	LAMB2	3913	663
A0A024R3E3;P02647;F8W696	APOA1	4	24	86.1	1345	0	323.31	92100000000	APOA1	335	1
A0A024R412;A0A024R3W6;X5D7M1;Q7LBX6;B7ZL68;X5D2Q8;Q7Z3T9;O60462-4;O60462-5;O60462-2;O60462-3;O60462	NRP2;DKFZp686J1169	14	3	3.2	4	0	17.51	1386300	NRP2	8828	626
B3KU41;D3DN77;C9IZ80;A0A024R3Z6;Q53FN7;Q7L1Q6-2;Q7L1Q6;Q7L1Q6-4;Q7L1Q6-3	hCG_2022736;BZW1	9	1	7.1	2	0.010189	6.5495	151710000	hCG_2022736	9689	198
A0A024R433;P24593	IGFBP5	3	8	29.8	15	0	93.617	231660000	IGFBP5	3488	161
A0A024R462;B7ZLE5;P02751-17;P02751-3;P02751;P02751-9;P02751-14;P02751-8;P02751-10;P02751-6;P02751-7;P02751-15;P02751-5;P02751-11;P02751-13;P02751-12;P02751-4;Q6MZM7	FN1;DKFZp686O12165	46	92	44.2	891	0	323.31	5643600000	FN1	2335	31
H7BZC3;Q6ZN49;Q6ZS03;Q96CF6;H0Y394;B2R5V9;A0A024R4E5;Q00341-2;Q00341	HDLBP	9	1	6	1	0	21.051	4038600	HDLBP	3069	539
A0A024R4F1;P06733;E2DRY6;P06733-2	ENO1	8	9	23.5	18	0	81.316	39269000	ENO1	2023	319
B4DIW2;F5H6X6;B4DSM6;A0A024R592;E9PKU7;B4DZ53;V9HWJ0;B4DJ30;Q14697;Q14697-2	GANAB;HEL-S-164nA	11	3	3.3	4	0	17.922	2309400	GANAB	23193	590
E9PRU1;Q9H3D5;Q96TF5;Q6FH22;B2RCM5;A0A024R5G1;O95967;H0YET5;Q59GI8	EFEMP2;MBP1	14	3	7.8	4	0	38.228	10778000	EFEMP2	30008	450
H0YD65;Q6FHS1;A0A024R5G9;Q9UBX1	CTSF	4	2	5.7	4	0	12.335	5909100	CTSF	8722	502
C9JB90;C9JU14;J3KR73;B7Z5Z9;Q6FGX3;Q6AZ91;Q53ET8;A0A024R5J5;A0A024R5H8;P20340-4;Q9NRW1-2;Q9NRW1;P20340-2;P20340;Q14964	RAB6B;RAB6A;RAB39A	15	1	22.4	1	0	13.506	2040600	RAB6B	5870	603
B3KRF9;A0A024R5J8;Q8WUA8	LRRC54;TSKU	3	5	16.2	11	0	72.544	28174000	LRRC54	25987	354
A0AV88;A0A024R5U5;O14672;H3BS53	ADAM10	4	2	5.1	2	0	13.753	2588300	ADAM10	102	579
Q8WUW7;A0A024R609;B4DNK4;H3BTN5;B4DRT3;V9HWB8;A0A024R5Z9;P14618-3;P14618-2;P14618;H3BQ34;Q504U3;H3BR70;B4DPM0;Q16716;Q16715;P30613-2;P30613	PKM2;PKM;HEL-S-30;PKLR	18	2	8.5	3	0	18.724	2758100	PKM2	5315	572
H9KV75;B7Z565;A0A024R694;P12814-2;P12814;P12814-3;P12814-4;B3KUX9;B4DFY0;H0YJW3;H7C5W8;A1L0V1;Q86TX4;B7Z2W3	ACTN1	33	4	7.9	8	0	62.631	2386500	ACTN1	87	588
A0A024R6G3;G3V4U0;Q9UBX5;B3KQA8;G3XA98;Q86TV4	FBLN5	7	7	16.3	22	0	106.06	148520000	FBLN5	10516	199
B2RBZ5;A0A024R6I6;G3V2W1;Q9UK55	SERPINA10	4	8	16.7	33	0	70.026	167470000	SERPINA10	51156	187
A0A024R6I7;A0A0G2JRN3;Q13747	SERPINA1	18	1	34.7	85	0	323.31	1570700000	A0A024R6I7	NA	61
B2R815;A0A024R6I9;P29622	SERPINA4	3	7	17.3	15	0	91.008	24701000	SERPINA4	5267	370
B4DPC7;A0A024R6N9;P05154;B3KTV6;B4DDH1;G3V5Q9	SERPINA5	11	8	26.2	20	0	113.23	73076000	SERPINA5	5104	260
A0A024R6P0;B3KS79;P01011;G3V3A0	SERPINA3	6	9	23.6	32	0	93.58	179020000	SERPINA3	12	183
A0A024R6R4;P08253-3;P08253;P08253-2;H3BR66	MMP2	8	14	23.8	37	0	172.77	97624000	MMP2	4313	233
I3NI28;Q53FV9;A0A024R6Z5;Q8IUW0;Q8NF36;P40313	CTRL;hCG_2026222;FLJ00366	6	1	5.3	3	0.010558	6.7911	6585800	CTRL	1506	492
K7EKF6;A0A024R7A9;Q8NI99	ANGPTL6	8	12	31.4	31	0	172.33	83217000	ANGPTL6	83854	245
A2VCQ4;A0A024R7F1;K7ELL7;B4DJQ5;P14314-2;P14314;A0A0S2Z4A0;A0A0S2Z4D8;A0A0S2Z4W7	PRKCSH	12	5	28.2	7	0	39.669	17952000	PRKCSH	5589	409
A0A024R7Z9;H7BYW6;A8K852;Q32M96;P04085-2;P04085	PDGFA	6	1	6.8	2	0	16.129	6330500	PDGFA	5154	497
B3KXC5;B4DE73;A0A024R8C9;B1B0D4;Q86TH1	ADAMTSL2	5	1	2.4	1	0.007728	7.0725	1158900	ADAMTSL2	9719	647
B4DNL5;A0A024R8S5;P07237;B4DUA5;H7BZ94;B4DLN6;H0Y3Z3;B3KTQ9;Q96C96	P4HB	18	14	26.6	17	0	91.691	20634000	P4HB	5034	388
A0A024R8V7;A0A140VK57;P16035;B4DFW2	TIMP2	5	9	37.4	23	0	116.8	335830000	TIMP2	7077	134
B4DQA0;A0A0H5AY34;Q8WW79;A0A024R8Z0;P14151;P14151-2	SELL	6	1	2.5	2	0.0079114	7.3258	4275600	SELL	6402	535
A0A0U1RR20;A0A024R930;Q92954-3;Q92954-6;Q92954;Q92954-4;Q92954-2;Q92954-5;B3KQ20	PRG4	14	11	8	32	0	114.49	43054000	PRG4	10216	304
A0A024R944;P01008;A0A0K0Q2Z1;Q8TCE1	SERPINC1	11	21	35.6	56	0	323.31	357950000	SERPINC1	462	131
A0A024R9J3;Q9Y6Z7	COLEC10	2	6	21.7	24	0	170.81	270600000	COLEC10	10584	145
A0A024R9Q1	THBS1	7	1	37.8	125	0	323.31	331160000	A0A024R9Q1	NA	135
Q6DN23;A0A024RA96;P14555;Q96RW9	PLA2G2A;PLA2	4	3	18.1	5	0	23.374	11493000	PLA2G2A	5320	445
A0A024RAA7;P02747	C1QC	2	6	26.1	95	0	162.61	8110000000	C1QC	714	25
A0A024RAB6;P98160	HSPG2	5	34	9.7	67	0	323.31	20492000	HSPG2	3339	390
A0A0A0MSV6;D6R934;A0A024RAB9;P02746	C1QB	5	7	29.3	39	0	323.31	6027300000	C1QB	713	30
X6RLJ0;A0A024RAG6;P02745;Q9H2L7	C1QA	4	2	9.5	28	0	102.81	1850900000	C1QA	712	57
A0A024RAK9;P10915	HAPLN1	3	3	12.1	6	0	31.769	4959300	HAPLN1	1404	520
F5H0S1;H0YF85;A0A024RAU1;P10997	IAPP	4	2	13.9	2	0.0071429	11.293	21422000	IAPP	3375	383
A0A024RAX0;P08493;P08493-2	MGP	3	3	32	10	0	56.347	217620000	MGP	4256	168
F5H823;B7ZB78;F5GZG1;E7ESV4;A0A0J9YXB3;F5H7Y6;A0A024RB87;P61224-4;P61224-3;P61224;A6NIZ1;F5GX62;B7ZAY2;P61224-2	RAP1B	17	2	35	4	0	37.496	9897200	RAP1B	5908	462
A0A024RC33;Q15555-4;Q15555-5;Q15555-3;Q15555;K7ERD8;Q15555-2	MAPRE2	7	2	5.2	2	0.0088968	11.194	2113600	MAPRE2	10982	600
A0A024RC42;P19022-2;P19022	CDH2	5	4	5.4	7	0	188.37	3828400	CDH2	1000	543
H0Y2X5;Q7Z3A2;B4DYU3;B2R5T2;A0A024RC95;P47895	ALDH1A3;DKFZp686G1675	6	1	3	1	0.010463	6.7215	35394000	ALDH1A3	220	329
H0Y3Q0;Q59H04;A0A024RCE2;A0A024RCD0;A0A087WZR0;A0A087WY68;P29122-2;P29122-8;P29122;P29122-7;H7BXT3;P29122-6;P29122-5;P29122-4	PCSK6	25	5	6.1	6	0	37.089	10442000	PCSK6	5046	457
Q8N4S1;A0A024RDE1;Q14515;Q14515-2;B4DNS6;B4DV72;B4E397;B7ZB68;B4DFZ4	SPARCL1	14	9	15.4	19	0	73.376	21893000	SPARCL1	8404	380
Q59GX5;V9HWJ7;Q53FI1;A0A024RDT4;P13796;U3KQI3;B3KUI1;Q5TBN3;B4DPW9;A0A0A0MSQ0;Q53GY0;P13796-2;P13797-3;P13797-2;P13797	HEL-S-37;LCP1;PLS3	15	2	5	2	0	12.197	867850	HEL-S-37	3936	665
Q5NT47;Q8HWG0;Q256S0;X5EPI2;X2JR57;X2JJP1;X2J867;W8XWP2;W8XWJ3;W8TKG1;W8T046;W8SW77;W8SMD3;W8GIU3;W6SL23;W6SJH9;W5VXV3;W0YKF2;W0G8J4;W0G8H6;W0G8G7;V6BP59;V5L351;U6EV26;U6EUE7;U6ER56;U6EFV3;U6C266;U4Q5A9;U3PX30;U3MYE2;T2MKA4;T2MJP9;T2DL37;T1WF39;T1WEN4;S6C5A5;S6BHQ7;S5LQY8;S5CK34;S0F2I7;S0F0X7;R9USF5;R9UQX1;R9RU93;R9RIB4;R9RFL0;R7RVA4;R7RTM7;R5AK17;R4U4H5;R4RWW2;R4NBX1;R4N4G0;R4N0R6;R4MU36;R4MS49;…	HLA-B;HLA-B*;HLA-A;HLA;B*56;HLA-B*27;B-1510;B-3501;HLA-Bw62.4;HLA-Bw62.1;HLA-Bw62.5;HLA-Bw62.3;HEL-S-83;HLA-B57;DKFZp686N10220;HLA-B*1513;HLA-B35;HLA-B*3512;HLA-Cw;HLA B;HLA C;HLA-C;HLA-Cw*;HLA-B41;HLAC;HLA-CW	10755	0	15.8	3	0	47.725	9710900	HLA-B	NA	464
A0A0F7W082;A0ZXY8;V6CKU4;X5EM81;X4YT82;W8Y4A2;W8NKP1;W6SIV4;W6CJ57;W6CHX3;W6CGW3;W0HE66;W0G8I7;W0FBM8;V5V1E3;V5L1W2;U6ER51;U6BZQ8;U3R9Y1;T2BQE4;S6B3R2;S5U3G8;S5CRT1;S4VA55;S0F2B7;S0F2B5;S0F2B1;R9WYX8;R9UR01;R4NJ42;R4KXX0;Q9TQP8;Q9GIP0;Q9BCN8;Q95IG6;Q8SNC6;Q8HWT0;Q6L675;Q6F3E3;Q6F3E2;Q6AW25;Q5NTA9;Q4ZG93;Q4W6C0;Q4W5U0;Q4A1H0;Q3YBM1;Q2PP85;Q25BN7;Q1EPW2;Q1EJP6;Q0GC70;Q0E7X5;N1NRX6;N1LK74;M9TNT6;M9T…	HLA-A;HLA;HLA-B;HLA-A24AK;HLA-C;HLA-Cw;HLA-H	1132	0	22.3	12	0	79.236	24429000	A0A0F7W082	3105	371
A0A068LKQ2		1	1	13.3	5	0	90.034	28731000	A0A068LKQ2	NA	349
A0A075B6H7;P04434	IGKV3-7	2	1	26.7	1	0.0083752	9.1375	2828500	IGKV3-7	NA	566
Q5NV92;A2N2G8;A0A075B6H9	V5-6;VLC8;IGLV4-69	3	2	26.3	3	0	46.667	30998000	V5-6	NA	341
Q5NV62;A0A075B6I0	V3-4;IGLV8-61	2	1	18.2	2	0.0081833	8.1557	647110000	V3-4	NA	101
Q5NV83;A0A075B6I9	V3-3;IGLV7-46	2	1	25.5	3	0	119.54	269200000	V3-3	NA	146
Q5NV65;A0A075B6J9	V1-5;IGLV2-18	2	2	29.3	5	0	15.18	65994000	V1-5	NA	269
Q5NV64;A0A075B6K0	V2-11;IGLV3-16	2	1	30.9	7	0.0082919	8.5823	106210000	V2-11	NA	224
Q5NV84;A0A075B6K3;A2N2X0;A2NYQ8;A2KUC4;P01712	V1-3;IGLV2-11;VL6;HuD11lambda Vlambda;IGLV	6	1	16.2	4	0.010511	6.7537	240640000	V1-3	NA	160
Q5NV61;A0A075B6K6	V5-1;IGLV4-3	2	2	23.3	2	0	12.806	9437300	V5-1	NA	467
A0A075B6L1;A0M8Q6	IGLC7	2	1	46.2	3	0	15.589	64728000	IGLC7	NA	272
A0A075B6N7	IGHA2	1	1	27.9	7	0	23.957	18090000	IGHA2	NA	405
A0A0C4DH68;A0A075B6R9	IGKV2-24;IGKV2D-24	2	1	10.8	8	0	108.08	626820000	IGKV2-24	NA	104
A0A075B7B8	IGHV3OR16-12	1	1	26.5	1	0.0076687	6.9743	10709000	IGHV3OR16-12	NA	452
A0A075B7D0	IGHV1OR15-1	1	1	26.5	1	0	16.567	4281400	IGHV1OR15-1	NA	534
F8VWU1;A0A080YV01;P00709	LALBA;LYZG	3	1	6.5	4	0.010574	6.7913	40165000	LALBA	3906	315
A0A087WSY5;Q96IY4;Q96IY4-2	CPB2	4	8	21	16	0	88.908	79934000	CPB2	1361	251
A0A087WSY6	IGKV3D-15	2	0	31.9	1	0.0086356	10.374	95134000	IGKV3D-15	NA	235
A6XMH1;A0A087WV45;E9KL36;A6XGL1;A0A087WT59;P02766	TTR;HEL111	8	3	19.6	101	0	134.98	4287700000	TTR	7276	36
A0A087WU91;A0A0A0MS15;Q0ZCH6	IGHV3-49	3	4	40.4	17	0	135.39	259060000	IGHV3-49	NA	152
A0A087WUS2;A0A0A0MRZ8;P04433	IGKV3D-11	3	2	34.3	4	0	81.441	45708000	IGKV3D-11	NA	299
A0A087WV47;V9HW68;A0A087X1C7;A0A0G2JNK4;Q5EFE5;P01857;A0A0A0MS08;A0A0A0MS07	IGHG1;HEL-214	22	1	40.1	14	0	16.32	184310000	A0A087WV47	NA	181
A0A087WVP1;Q14517	FAT1	2	4	1.2	4	0	23.95	241940	FAT1	2195	690
B4DNE0;Q96RE1;Q9NZS6;A0A087WVQ9;Q6IPT9;Q6IPS9;Q6IPN6;Q53HR5;Q53HM9;Q53GE9;Q53GA1;Q53G85;A8K9C4;P68104-2;Q5VTE0;P68104;Q96C29;Q8TBL1;Q6P082;Q96CD8;Q6P4C9;Q504Z0;B4E2C5;Q8IUB0;Q53HR1;Q16577;B4DV42;A0A087WV01;Q9H2I7;Q53HQ7;A9X7H1;Q14222;Q59GP5;Q53G89;Q05639	EEF1A1L14;EEF1A1;EEF1A1P5;PTI-1;EEF1A;EEF1A2	39	4	10.1	8	0	36.473	8245000	EEF1A1L14	1915	474
A0A087WW89;A0A0F7TAG7;A0A0B4J1Y9	IGHV3-72	4	2	60.4	14	0	62.545	487240000	IGHV3-72	NA	116
A0A087WWU8;Q5HYB6;P06753-3;P06753-6;P06753-2;B2RDE1;A0A0S2Z4G4;Q8NAG3;B4DWT5;Q5VU61;D6R904	TPM3;DKFZp686J1372	16	0	31.7	4	0	47.446	4087100	A0A087WWU8	7170	537
A0A087WXI2;Q9Y6R7	FCGBP	3	7	2.7	11	0	61.074	1077400	FCGBP	8857	652
B3GN61;D3XNU5;A0A0U2ZQU7;Q9UII7;A0A087WXI5;P12830;A5D8W4;A0A087WX17;A0A087WU43;A0A0E3XJU3;P12830-2;H3BNC6;H3BVI7;B4DNH0	CDH1	15	7	11.2	30	0	194.71	93398000	CDH1	999	237
A0A087WXL8;Q6N030;Q5EBM2	IGHG3;DKFZp686I15212	13	1	35.4	101	0	323.31	4085500000	A0A087WXL8	NA	37
A0A087WYC5	IGHG1	10	0	40.4	20	0	150.24	730260000	A0A087WYC5	NA	94
A0A087WYJ9;A0A075B6N9;P01871;P01871-2;P04220	IGHM	21	1	44.2	584	0	323.31	19500000000	A0A087WYJ9	NA	11
B0YJ74;A0A087WYS6;Q05DH1;A0A0K0K1K4;O14818-2;Q8TAA3-2;O14818;Q8TAA3-5;Q8TAA3	PSMA8;PSMA7	9	1	5.2	2	0.010086	6.5187	1021700	PSMA8	5688	654
A0A125QYY5;A0A087WZH9;Q96SA9;A0A125QYY3;A0A109PW65;A0A0X9UWJ6;A0A0X9USN3;A2NI60;A0A0B4J1U0;P80362;P01610;P01607;P01600;P01599;P01593;P01613	IGKV1D-33	16	1	31.8	4	0	54.298	135280000	IGKV1D-33	NA	205
A0A087X0P6;A0A075B6S2;A2NJV5	IGKV2D-29;IGKV A18	5	2	47.1	3	0	38.378	13368000	IGKV2D-29	NA	433
A0A087X0Q4;A0A087WW87;A0A075B6R1;P01614;B7ZMG8;A2IPI1;A0A075B6P5;P06309	IGKV2-40;IGKV2D-40;IGKV2D-28	8	2	56.7	3	0	69.049	63155000	IGKV2-40	NA	274
A0A087X1J7;P22352	GPX3	9	7	32.4	36	0	166.19	1307100000	GPX3	2878	70
A0A087X232;A8K2N0;P09871;B3KNX0;F8WCZ6	C1S	8	23	39.4	180	0	323.31	5053900000	A0A087X232	716	32
A0A087X2C0	IGHM	15	0	45.2	21	0	29.42	633130000	A0A087X2C0	NA	103
A0A090N7U9;Q99969;C9J8S2	RARRES2	3	4	25.8	20	0	65.825	763900000	RARRES2	5919	91
A0A090N8Y2;P13667	ERP70;PDIA4	2	3	2.9	4	0	17.845	1676400	ERP70	9601	615
A0A096LPE2;P35542;B2R5G8	SAA2-SAA4;SAA4	10	7	43.3	97	0	119.37	9440200000	SAA2-SAA4	6291	20
A0A0A0MRJ7;P12259	F5	8	40	26.8	179	0	323.31	379490000	A0A0A0MRJ7	2153	126
Q32NB1;A0A0A0MRV0;A7BI36;Q9P2E9-2;Q9P2E9	RRBP1	5	1	2.5	4	0.010279	6.6359	22409000	RRBP1	6238	378
A0A0A0MS11	IGHV3-13	1	1	19	6	0	16.089	169810000	IGHV3-13	NA	186
A0A0F7T737;Q7Z3Y6;A0A0A0MS12;A0A0G2JP38;A0A0C4DH40;A0A068LL62;A0A0G2JNA6;A0A0C4DH41;A0A068LKP9;A0A068LKQ4;A0A0A0MS13;A0A120HG46;Q86SX2;O95973	VH4-34;IGHV4-34;IGHV4-59;IGHV4-61;IGHV4-39;IGM	14	1	45.1	9	0	35.298	291490000	VH4-34	NA	141
A0A0A0MSD0;Q4LDE5;Q5JB40	SVEP1	8	16	5	24	0	132.93	3261800	SVEP1	79987	551
A0A0A0MT66;B4DEA7;B2R5M3;P05060	CHGB	4	1	5.5	1	0.01037	6.6841	1279200	CHGB	1114	636
A0A0A0MT74	IGKV1-16	1	1	13.7	5	0	38.971	20984000	IGKV1-16	NA	387
A0A0A0MTR1;B7Z9B1;P55290;P55290-4;A0A087X0X6;P55290-5	CDH13	12	9	13.8	18	0	112.77	40150000	CDH13	1012	317
Q5U0B9;A0A0A6YY95;Q9Y240;V9H0X6;M0R081;A0AUH1	CLEC11A	6	2	7.7	2	0	14.478	1238800	CLEC11A	6320	639
A0A0B4J1T9;A0A0G2JMV0;A0A0C4DH90;A0A0C4DH55;P04207	IGKV3-15;IGKV3OR2-268;IGKV3D-7	6	0	32.2	11	0.0085911	10.287	4420300000	IGKV3-15	NA	35
Q5NV80;A0N8J8;A0A0B4J1U2;P04211	V3-2;IGLV7-43	4	1	25.5	5	0.0084602	9.8473	319770000	V3-2	NA	136
A0A0B4J1V6;A0A0G2JN55;A2J1N8	IGHV3-73	3	2	35.3	7	0	40.835	27315000	IGHV3-73	NA	360
A0A0B4J1X5	IGHV3-74	1	1	31.6	5	0	156.66	58147000	IGHV3-74	NA	281
A2MYC8;A0A0B4J1Y8;Q8TBD0	V5-2;IGLV9-49	3	4	35.6	12	0	35.898	394790000	V5-2	NA	125
A0A0B4J2B5;S4R460	IGHV3OR16-9	2	0	41.8	8	0	16.099	32827000	IGHV3OR16-9	NA	336
B0YIW1;A8K9M4;A0A0B4RUS7;Q6Q788;C9JZZ0	APOA5	5	11	29.8	32	0	124.85	147300000	APOA5	116519	200
A0A0C4DFP6;Q9NQ79-2;Q9NQ79;Q9NQ79-3;Q5T4F6	CRTAC1	5	12	24.6	33	0	228.99	105840000	CRTAC1	55118	225
Q5VY30;A0A0C4DGV7;P02753	RBP4	3	7	29.6	27	0	55.088	241030000	RBP4	5950	159
A0A0C4DH32	IGHV3-20	1	1	18.8	1	0	13.238	10320000	IGHV3-20	NA	458
A0A0C4DH33;A0A109PT03	IGHV1-24	2	2	35.9	1	0	34.502	2895100	IGHV1-24	NA	561
A0A0C4DH35	IGHV3-35	1	1	9.4	7	0	148.29	68548000	IGHV3-35	NA	267
A0A0C4DH36	IGHV3-38	1	2	19	3	0	14.308	18146000	IGHV3-38	NA	404
A0A0C4DH38;A0A0F7T8B3;A0A0J9YXX1	IGHV5-51	3	0	34.2	2	0	29.687	8472900	IGHV5-51	NA	473
A0A0C4DH43		1	1	12.6	3	0	11.918	14087000	A0A0C4DH43	NA	427
A0A0G2JN06;P01859	IGHG2	2	1	32.8	2	0.0082781	8.5571	1759800	IGHG2	NA	611
A0A0G2JPD4;P01861;Q6MZX7	IGHG4;DKFZp686M24218	3	3	34.6	17	0	66.402	202170000	IGHG4	NA	172
Q5NV82;A0A0G2JSC0;A0A0G2JS06;A0A087WSX0	V4-2;IGLV5-45	4	4	24	11	0	57.279	262780000	V4-2	NA	150
A0A0J9YX35		1	1	18.8	3	0	15.978	29740000	A0A0J9YX35	NA	344
A0A0K0K1J1;P01034	CST3	2	3	23.3	3	0	21.448	9862500	CST3	1471	463
Q8IZZ5;A0A0R7FJH5		3	1	24.4	96	0	323.31	1422600000	Q8IZZ5	2161	66
A0A0S2Z3D5;P02649;J9ZVQ3;H0Y7L5;Q6LBZ1;E9PEV4;E7ERP7	APOE	14	11	70	369	0	323.31	29600000000	A0A0S2Z3D5	348	6
A8K6C1;A0A0S2Z3F6;P11597;Q5TZS4;B4DMZ5;A0A0S2Z3I8;P11597-2	CETP	10	6	11	18	0	68.325	146980000	CETP	1071	201
A0A0S2Z3Y1;Q08380;B4DVE1;B3KP88;B4DDG4;B4DWA8;B4DI70	LGALS3BP	16	18	34.5	111	0	323.31	2235200000	LGALS3BP	3959	49
B2R6M6;A0A0S2Z4F1;Q12805-2;Q12805-4;Q12805-3;Q12805;A8KAJ3;Q59G97;Q53TA7;B3KS53	EFEMP1	10	3	43.2	74	0	323.31	411510000	B2R6M6	2202	123
A0A0S2Z4I5;P27918;E9PAQ1;B3KVK6	CFP	6	10	24.3	62	0	148.75	1200300000	CFP	5199	72
A0A0S2Z4K3;A0A0S2Z4L3;P07225;Q9NSD0;Q16519;G5E9F8;B4E1L6	PROS1	24	20	31.8	144	0	323.31	1817700000	PROS1	5627	58
A0A0S2Z4Q2;Q15582;Q53GU8;A0A0S2Z4K6;H0Y8L3	TGFBI	13	13	21.5	31	0	176.25	74833000	TGFBI	7045	255
A0A0U1RR07;E9PIB5;E9PRW5;Q9BQS1;E9PQL8;E9PS29;E9PPL3;A0A024R5N9;A0A0U1RQH1;A0A0U1RQP0;Q9HCH5-4;Q9HCH5-9;Q9HCH5-2;Q9HCH5-15;Q9HCH5-12;Q9HCH5-14;Q9HCH5-6;Q9HCH5;Q9HCH5-13;Q9HCH5-11;Q9HCH5-7;Q9HCH5-8	SYTL2;CHR11SYT	22	2	0.7	2	0.0087719	10.779	8690700	SYTL2	54843	470
A0A0X9T7V9		1	1	24.8	2	0.0080645	7.8049	1432800	A0A0X9T7V9	NA	623
A0A0X9TD88		1	1	12.6	4	0	53.45	28427000	A0A0X9TD88	NA	351
A0A0X9UWK7		3	0	32	5	0	46.38	73778000	A0A0X9UWK7	NA	258
A0A0X9UWL5;P06314		5	1	47.8	2	0.0071685	11.343	7946600	A0A0X9UWL5	NA	477
A0A0X9UWM4		1	3	26	6	0	44.404	17245000	A0A0X9UWM4	NA	413
A0A109PP82		1	1	14	1	0	15.909	9572800	A0A109PP82	NA	465
A0A109PW50		1	1	17.7	2	0	40.993	10274000	A0A109PW50	NA	460
A0A125QYY4		1	1	20.2	1	0.01013	6.5382	5759900	A0A125QYY4	NA	504
A0A125QYY9		1	2	28.5	3	0	63.055	50379000	A0A125QYY9	NA	293
A0A125U0V2;P06331;A0A068LRW4		3	1	19.7	3	0.0088183	10.988	92734000	A0A125U0V2	NA	238
A0A125U0V4		1	1	8.7	5	0	20.991	26150000	A0A125U0V4	NA	364
A0A140VJI7;Q16610;Q16610-4;C8CHS3;Q16610-2	ECM1	7	7	15.6	14	0	78.579	11161000	ECM1	1893	449
A0A140VJU8;P08294;B2R9V7	SOD3	5	9	43.3	22	0	230.17	264310000	SOD3	6649	149
A0A140VK00;P25311	AZGP1	3	4	13.1	8	0	45.959	16357000	AZGP1	563	416
A0A140VK24;P04180;J3QSE5	LCAT	5	7	16.6	36	0	177.39	255290000	LCAT	3931	155
Q53FT8;A0A140VK45;P20618;Q59GN1	PSMB1	4	2	10.4	2	0.0036166	11.685	1182300	PSMB1	5689	642
A0A140VKF3;P36955	SERPINF1	9	11	25.4	30	0	98.338	48554000	SERPINF1	5176	295
E7EQB2;E7ER44;V9HWI4;A0A161I202;P02788-2;P02788;B7ZAL5;B3VMW0;A8K494;Q5EK51;B2MV14	LTF;HEL110	15	1	57.6	90	0	323.31	157760000	LTF	4057	195
A0A5E4;S6BAP8		2	0	40.9	9	0.008547	10.229	246650000	A0A5E4	NA	157
A0N5G1;P01598	V<kappa>1	4	2	31.9	11	0	92.148	2763200000	V<kappa>1	NA	46
A0N5G5;A0A0X9TD47	V<kappa>3	2	0	35.6	2	0	71.066	66978000	V<kappa>3	NA	268
A0N5G7	VH3	1	1	9.2	2	0	13.196	25766000	A0N5G7	NA	366
A0N7I9	F5-20	1	1	18.7	6	0	21.408	154880000	F5-20	NA	196
A0N7J6		1	1	22.4	2	0	81.209	164200000	A0N7J6	NA	190
A0N8J1;P01601		2	1	16.2	4	0.0085324	10.166	40009000	A0N8J1	NA	318
A2J1M8		2	2	32.6	5	0	39.867	70389000	A2J1M8	NA	264
A2J1N6		1	2	44.3	3	0	27.69	63557000	A2J1N6	NA	273
A2JA14		1	0	33.9	3	0.0081967	8.2547	12477000	A2JA14	NA	436
A2KBC8;A2KBC7;A2KBC6;A2KBC5;A2KBC4;A2KBC3;A2KBC2;A2KBC0;A2KBB9;A2KUC3;A2KBC1	IGHV	27	0	31.9	23	0	206.01	785650000	IGHV	NA	88
A2MYE2;A2MYE1;A0A0B4J1Z4	A30;IGKV1-17	4	2	46.9	3	0	73.171	69062000	A30	NA	266
A2N011		1	1	15	1	0.0077042	7.022	10729000	A2N011	NA	451
A2N0T6	VH6DJ	1	1	7.6	2	0.010324	6.6712	5666100	A2N0T6	NA	506
A2N0U4	VH6DJ	1	1	19.8	2	0.0090772	6.7993	6511700	A2N0U4	NA	495
A2NB44	IGH@	1	1	21.9	2	0.01034	6.674	4364000	A2NB44	NA	532
A2NKM7		1	1	24.8	2	0.0084175	9.254	5570500	A2NKM7	NA	507
A2NUT2		10	1	43.8	10	0	21.804	566570000	A2NUT2	NA	107
A2NWW1;A2NXP8	VH-3 family (VH26)D/J	2	1	23	5	0	32.169	36077000	VH-3 family (VH26)D/J	NA	326
A2NYU9		1	1	8.2	5	0	14.974	91404000	A2NYU9	NA	239
A2NYV1		1	2	24.2	2	0.008726	10.727	5173000	A2NYV1	NA	518
A2NYV4;A2MYD6;A0A087WZW9	V1-2;IGLV2-8	3	2	22.3	11	0	17.211	113510000	V1-2	NA	220
Q5T985;A2RTY6;D3DRR6;P19823;A0A087WTE1;B4DM79	ITIH2	8	26	24.2	127	0	323.31	863640000	ITIH2	3698	82
A2VDJ4;Q96RZ2;Q9UJJ9;H0YEA7	GNPTG;RJD9	6	3	13.7	4	0	35.125	2938700	GNPTG	84572	560
A3KPE2;B0YIW2;P02656	APOC3	3	5	39.4	79	0	323.31	13900000000	APOC3	345	17
Q4VB24;B2R984;A3R0T8;A3R0T7;P16403;P10412;P16402;A1L407;P22492;Q02539	HIST1H1E;HIST1H1C;HIST1H1D;HIST1H1T;HIST1H1A	10	3	18.7	10	0	38.274	54635000	HIST1H1E	3006	284
A3RKG7;F5H8B0;P08709-2;P08709;B4DPM2;Q6TDG2	F7	6	4	20.5	12	0	126.36	50455000	F7	2155	292
Q53GD2;A4D1B8;Q14314	FGL2	3	2	3.9	3	0	13.031	1362300	FGL2	10875	629
B7Z5Q2;Q1L857;A8K5A4;A5PL27;P00450;E9PFZ2;H7C5R1;B3KTA8	CP	12	34	32.1	187	0	323.31	1796900000	CP	1356	59
Q2KHQ6;B2R9E5;Q29RW7;Q1WWL5;A5PL32;U5LKR8;U5LKC6;U5LII8;U5LIC5;U5LGW0;B4E1N5;U5LKN4;U5LKN0;B4DNT5	APOL1	14	3	34.2	8	0	23.479	100960000	Q2KHQ6	8542	231
A5PLK9;P13497;Q59F71;P13497-5;P13497-2;P13497-6;P13497-4	BMP1	14	9	10.1	12	0	62.983	3157700	BMP1	649	556
A5YAK2	APOC4	1	1	38.6	23	0	74.987	1578900000	A5YAK2	NA	60
A6XND0;P17936;P17936-2;A6XND1;B4DP07;B4DN53;B3KTQ0;A6XNC9;B3KVF9;Q6ZSD0;B3KWK7;B3KRZ1;H0Y485;H0Y5K2;B3KVY6;B3KTS0;C9JMX4	IGFBP3	20	16	59.6	52	0	194.26	251240000	IGFBP3	3486	156
A6XND8;H7BY64;E1U340;Q96NZ9-2;Q96NZ9-4;Q96NZ9;Q96NZ9-3	PRAP1	7	2	13.4	4	0	13.694	83111000	PRAP1	118471	247
Q6FHW3;K7ERG9;A6XNE2;P00746	DF;CFD	4	6	25.9	11	0	55.17	50282000	DF	1675	294
A8K008		7	0	39.4	424	0	323.31	9209900000	A8K008	NA	21
A8K061;Q9Y5C1	ANGPTL3	2	8	16.7	17	0	75.318	28276000	ANGPTL3	27329	352
B4DUA8;B3KQM8;B4E2D8;A8K0E7;Q08174;Q08174-2	PCDH1	6	1	1.5	1	0.0099291	6.423	1372500	PCDH1	5097	627
J3KRP0;A8K1K1;Q96KN2;B4E180	CNDP1	4	15	33.2	57	0	254.74	229980000	CNDP1	84735	162
F8WBR5;M0QZ52;G3V479;Q9BRL5;B4DJ51;B2RDW0;E7ETZ0;A8K1M2;H0Y7A7;E7EMB3;P62158	CALM2;CALM3;CALM1	11	1	26.2	3	0	51.729	22315000	CALM2	801	379
B3KRV7;Q6IAV0;Q53HW6;A8K2M5;P06858;B7Z4C6	LPL	11	9	18	19	0	76.079	29477000	LPL	4023	345
Q63HM4;A9X9L0;A9X9K9;A8K2P8;Q02487-2;Q02487;Q68DY8;B4DLJ5	DKFZp686P18250;DSC2;DKFZp686I11137	9	5	8.6	8	0	66.563	7861000	DKFZp686P18250	1824	478
A8K2T4;P10643;B2R6W1;B4E3S6	C7	6	15	23	31	0	257.79	43100000	C7	730	303
A8K2W3;O95810	SDPR	2	5	10.8	7	0	29.542	27250000	SDPR	8436	361
G3XAP6;A8K3I0;P49747;B4DN90;Q53FR6;B4DN75;P49747-2	COMP	8	16	35.9	74	0	323.31	220720000	COMP	1311	164
K7EMV3;Q6TXQ4;B4E380;B4DEB1;K7EK07;B2R6Y1;B2R4P9;A8K4Y7;K7ES00;Q71DI3;Q16695;P84243;P68431;K7EP01;Q5TEC6;Q6NXT2	H3F3B;H3F3A;HIST2H3A;HIST3H3;HIST1H3A;HIST2H3PS2;H3F3C	16	2	17.4	3	0.0086957	10.624	27623000	H3F3B	126961	359
B2R773;A8K660;Q15848	ADIPOQ	4	4	24.2	44	0	146.01	1419100000	ADIPOQ	9370	67
B7Z2I6;G3V0E5;A8K6Q8;P02786	TFRC	4	2	5	3	0	15.47	1897500	TFRC	7037	608
Q53GX6;A8K7Q1;Q02818;B4DZX0;H7BZI1	NUCB1	10	15	30.6	27	0	180.78	71115000	NUCB1	4924	261
A8K8Z4;P13671	C6	2	20	20.2	42	0	227.9	33140000	C6	729	333
B7Z550;B7ZA94;B7Z555;A8K9M5;P07358;F5GY80;F5H7G1;Q05CV3	C8B	8	18	31.9	66	0	323.31	267260000	C8B	732	148
Q8TAY0;B0AZL7;P35858;P35858-2	IGFALS	4	9	14.9	13	0	64.158	12925000	IGFALS	3483	435
B3KRK8;B0YJC4;V9HWE1;Q53HU8;P08670;B0YJC5	VIM;HEL113	60	11	27	17	0	81.927	15632000	VIM	7431	420
B0YJC6;P22891;P22891-2	PROZ	3	7	17.3	13	0	46.085	22934000	PROZ	8858	375
B4E1B3;Q86U78;Q53YY1;Q53GY3;B2R5S1;B0ZBE2;Q59EP2;P01019;B4DE80	AGT	12	5	11.6	20	0	83.413	83177000	AGT	183	246
B1AHL2	FBLN1	2	1	28.2	4	0.0081699	8.0992	7803400	B1AHL2	NA	479
C9JVB2;H0Y4S8;B4DYG9;Q9H9L2;B1AN15;E7EN73;B2RBC8;Q8IZA0-2;Q8IZA0	KIAA0319L	9	1	6.2	1	0	23.052	5790700	KIAA0319L	79932	503
B1N7B8		1	2	54.2	4	0	16.072	8198600	B1N7B8	NA	475
Q8IZD8;B1N7B9		2	1	21.8	3	0	50.251	37964000	Q8IZD8	NA	322
B2R4C5;P61626;F8VV32;A0A0B4J259	LYZ	4	8	49.3	28	0	58.315	3750000000	LYZ	4069	39
B2R4M6;P06702	S100A9	2	2	18.4	4	0	22.908	24423000	S100A9	6280	372
Q0VAS5;B2R4R0;P62805	HIST1H4H;HIST1H4A	4	3	31.1	3	0	18.084	6901500	HIST1H4H	121504	488
D0EI67;B2R5J8;P13501	CCL5	4	5	40.7	10	0	31.878	292280000	CCL5	6352	140
B2R6V9;P00488;B4E2L8	F13A1	14	18	24.7	47	0	241.56	218870000	F13A1	2162	167
Q53FC7;B3KSM6;B2R6X5;P48741;P17066	HSPA7;HSPA6	5	1	1.7	1	0.0083472	8.8654	1469600	HSPA7	3310	621
B2R7N9;Q99983	OMD	2	4	10	8	0	41.695	12127000	OMD	4958	439
B2R7Z6;Q8TDL5;Q8TDL5-2	BPIFB1	3	2	3.9	2	0	11.815	881030	BPIFB1	92747	664
Q05CU9;Q5VUU6;B2R829;P41218	MNDA	4	1	5.5	2	0	51.701	709990	MNDA	4332	674
F1C4A7;B2R888;P08571;D6RFL4	CD14	5	10	26.1	26	0	141.42	218880000	CD14	929	166
B2R8I2		2	1	28.6	6	0.0091603	6.8481	125860000	B2R8I2	NA	212
C9JBB3;B2R8Y9;P10646;C9JT76;C9JQ14;Q59EE5;C9JKV3;P10646-2	TFPI	8	4	16.7	10	0	41.229	35877000	TFPI	7035	327
B2R950;P20742;P20742-2	PZP	4	20	23.3	76	0	323.31	146460000	PZP	NA	202
B2R9F2;P08185	SERPINA6	4	3	7.2	6	0	17.892	5389300	SERPINA6	866	511
B2RA39;Q9BXR6;Q05CF5	CFHR5	3	19	33.7	125	0	323.31	2121400000	CFHR5	81494	52
B2RBW9;P55103	INHBC	2	4	15.6	17	0	126.54	89845000	INHBC	3626	241
B2RC09;Q13790	APOF	2	3	11.7	3	0	40.696	12343000	APOF	319	437
B2RCB8;Q8IUP8;Q7Z738;Q9NPG4	PCDH12	4	7	7.3	14	0	52.775	13513000	PCDH12	51294	431
Q5M8T4;B2RCP7;P29279-2;P29279;B3KRV6;Q6FHL8;B3KWK5	CTGF	7	4	10.3	8	0	31.48	6668000	CTGF	1490	490
B2RDL6;D3DQH8;P09486;F5GY03;B4DRV4;E5RK62	SPARC	6	6	18.5	15	0	84.675	71055000	SPARC	6678	262
B2RMS9;Q14624;Q68DH2;B7Z551;B7Z8Q7	ITIH4;DKFZp686G21125	6	1	30.1	1	0.009915	6.4071	85423000	B2RMS9	3700	242
Q5H9A7;Q58P21;Q6FGX5;B3KQF4;P01033;Q5H9B4;Q5H9B5	TIMP1	7	2	14.7	2	0	12.908	5308300	TIMP1	7076	514
Q6IAW5;B3KQF5;O43852-13;O43852-14;O43852-11;O43852-10;O43852-5;O43852-6;O43852;O43852-3;B3KNG6;A0A024R755;O43852-12;O43852-9;O43852-7;O43852-8;O43852-2;O43852-4	CALU	18	2	6	2	0.0071813	11.409	1943500	CALU	813	606
H7C5D5;Q53EK6;B3KQT8;Q9UKZ9	PCOLCE2	4	1	7.9	1	0	16.057	7278800	PCOLCE2	26577	484
Q53H91;B3KUE5;P55058-4;P55058;P55058-3;P55058-2	PLTP	6	5	11	12	0	42.308	52393000	PLTP	5360	289
B4E336;B3KUI0;B4DTS6;P48960-2;P48960-3;P48960	CD97	6	1	2.1	1	0.0082645	8.4958	813330	CD97	976	667
B3KV53;Q6ZTE7;B7Z5Y8;O75382-4;O75382-3;O75382-2;O75382	TRIM3	7	1	8.3	4	0.010448	6.7177	90044000	TRIM3	10612	240
B4DEW5;B4E3H8;Q9H8L6	MMRN2	3	1	1.2	2	0.0091463	6.8478	6992200	MMRN2	79812	487
B4DF70;V9HW12;P32119	HEL-S-2a;PRDX2	10	4	20.2	7	0	37.055	9946600	HEL-S-2a	7001	461
B4DFI6;B4DMJ2;H3BM89;Q53G74;Q59GY2;P36578	RPL4	6	1	6.2	3	0.010355	6.6788	3804700	RPL4	6124	544
H7C4B5;H7C391;B4DJB3;Q8IUX7-2;Q8IUX7	AEBP1	5	1	20.4	1	0.010309	6.6622	2504000	AEBP1	165	582
B4DJI2;P28799-2;P28799;K7EKL3;K7EQ05;B4E1G5;P28799-3	GRN	9	3	5.8	6	0	33.664	11392000	GRN	2896	447
H7BYD9;B4DKE0;P19021-2;P19021-4;P19021-3;P19021-6;P19021;P19021-5	PAM	9	3	3.8	4	0	18.779	2819900	PAM	5066	568
B4DLJ6;Q4ZG40;Q9UEW3-2;Q9UEW3;C9JKT8	MARCO	5	2	4	3	0	14.999	2824200	MARCO	8685	567
B4DPN0;D9IWP9;P02749	APOH	7	9	33.9	35	0	242.31	361390000	APOH	350	128
B4DPP8;D3DNU8;P01042-2;P01042-3;Q05CF8	KNG1	8	4	47.5	102	0	323.31	740290000	B4DPP8	NA	92
Q53HU9;Q53HT9;B4DPQ0;A8K5J8;P00736;F5H2D0;B4E1B0	C1R	14	28	42.6	200	0	323.31	3258300000	C1R	715	44
B4E1C4;E7END6;B4DPQ3;P04070;P04070-2;B4DPC8	PROC	22	13	28.3	91	0	260.1	892440000	PROC	5624	80
Q96AF9;B4DQR8;Q28617;B4DY85;H0Y2Y8;Q9BUS0;Q15942-2;Q15942;H7C3D3	ZYX	9	2	6.7	4	0	13.035	2305900	ZYX	7791	591
E9PF16;B4DTB9;Q96CM8-4;Q96CM8-3;Q96CM8;Q96CM8-2	ACSF2	6	1	1.7	4	0.0079745	7.4896	6309000	ACSF2	80221	498
B4DUV1;P23142-4;P23142-2;P23142-3	FBLN1	9	0	31.5	11	0	19.565	80619000	B4DUV1	NA	249
B4DZY7;Q14393-3;Q14393-2;Q14393;Q14393-5;Q14393-4;Q658L2	GAS6;DKFZp666G247	7	4	7.6	6	0	33.598	3906700	GAS6	2621	541
B4E1B2		10	1	57.1	4	0	12.455	17605000	B4E1B2	NA	412
B4E1C2;P01042	KNG1	2	2	30.7	9	0	27.383	32053000	B4E1C2	3827	338
B4E1D8;P04003;B4E1E1	C4BPA	6	31	56.9	701	0	323.31	15000000000	C4BPA	722	15
B4E1I8;Q68CK4;P02750	HMFT1766;LRG1	3	6	16.1	9	0	37.757	14118000	HMFT1766	116844	426
B4E1Z4;E7ETN3;P00751	CFB	22	19	18.4	43	0	303.49	26591000	CFB	629	363
B4E335;Q53GK6;Q53G99;Q53G76;Q1KLZ0;P60709;B4E3A4;Q8WVW5;P63261;B4DVQ0;B4DW52;B3KUD3;B7Z6P1;D2JYH4;P63267;P68133;P68032;P62736;I3L3I0;I3L1U9;B3KW67;A8K3K1;G5E9R0;E7EVS6;Q7Z7J6;A6NL76;C9JTX5;C9JZR7;A1E282;K7EM38;I3L3R2;J3KT65;Q13707;P63267-2	PS1TP5BP1;ACTB;ACTG1;ACTA2;ACTG2;ACTA1;ACTC1	84	14	41.3	31	0	192.88	191290000	PS1TP5BP1	60	178
B4E367;Q6UX71;Q6UX71-2	PLXDC2	3	2	4.1	2	0	12.705	1160800	PLXDC2	84898	646
Q5SR54;B4E3Q1;O94985-2;O94985	CLSTN1	5	3	3.6	3	0	17.438	938580	CLSTN1	22883	659
F8WE86;B5MBX2;P20062	TCN2	3	1	2	2	0.0080906	7.8718	1424200	TCN2	6948	624
B5MDF5;J3KQE5;P62826;H0YFC6;F5H018	RAN	8	3	13.7	5	0	22.086	10318000	RAN	5901	459
B6EDE2	HEL180	1	0	17.9	4	0	40.784	52994000	HEL180	NA	287
B7Z1F8		1	2	52.2	44	0	323.31	829880000	B7Z1F8	NA	84
B7Z397;B7Z3S6;B7Z1H7;E7ESX1;Q9H2X0-4;Q9H2X0-5;Q9H2X0	CHRD	7	1	8.7	2	0.0077519	7.1223	2741700	CHRD	8646	575
B7Z544;Q14624-3;Q14624-2;Q14624-4;Q59FS1;H7C0L5	ITIH4	6	1	28.7	2	0	14.16	1207200	B7Z544	NA	640
B7Z6T9;Q9Y3V7;Q86V58;B7Z9B8;P98095;P98095-2	DKFZp586A1519;FBLN2	6	4	9.4	7	0	26.833	3306400	DKFZp586A1519	2199	550
B7Z7M2		1	1	46.3	5	0	135.03	55054000	B7Z7M2	NA	283
E7ES19;B7Z832;P35443	THBS4	4	10	15.3	22	0	86.016	74795000	THBS4	7060	256
B7Z8A2;Q9UHG3;Q584P1;B7Z3Y2;Q9UHG3-2;F8W8W4	PCYOX1	10	7	16	13	0	61.143	19290000	PCYOX1	51449	400
B7Z8Q2;P02765;C9JV77;B7Z556	AHSG	5	10	23.6	91	0	323.31	3972100000	AHSG	197	38
B7ZKJ8	ITIH4	1	1	30.5	160	0	323.31	2070000000	B7ZKJ8	3700	53
E7ENL6;B7ZW00;P12111-4;B4E0A4;D9ZGF2;P12111-3;P12111-5;P12111-2;P12111;C9JNG9;Q63HQ4	COL6A3;DKFZp686K04147	11	4	1.9	5	0	25.866	614110	COL6A3	1293	675
C0JYY2;P04114;E1A689;A0A087WTM7	APOB	18	135	39.5	959	0	323.31	1134700000	APOB	338	76
C9JXF9;C1K3N3;Q6PEY6;P08833;C9J6H2	IGFBP1	5	7	28.4	20	0	52.482	125670000	IGFBP1	3484	213
D9YZU5;C8C504;P68871;Q8IZI0;Q8IUL9;Q3LR79;Q0Z944;Q9BWV6;Q9GZL9;B3VL86;Q14473;Q4TZM4;Q6J1Z7;Q4TWB7;B3VL31;Q6V0K9;Q52MT0;E9NGZ5;B3VL05;Q9UK54;D5FZW3;E9M263;Q9BXA2;Q14484;A9YUX2;B5ANL9;Q9UP81;F8W6P5;Q3Y9I8;Q670S4;Q4JLR8;B2M1S6;Q9BWU5;B3VL17;A0N071;P02042	HBB;HBD	88	8	58.5	28	0	123.98	159150000	HBB	3043	193
C9IZP8	C1S	1	1	16.5	5	0	18.202	209950000	C9IZP8	NA	169
C9J0K6;P30626-3;P30626-2;P30626	SRI	4	2	14.2	2	0.0087873	10.836	1185000	SRI	6717	641
C9J2Q8;G5E9K5;Q6P0N0-2;Q6P0N0	MIS18BP1	4	1	7.7	4	0.0099715	6.4854	2174600000	MIS18BP1	55320	51
C9JF17;P05090;B4DGC3;C9JX71	APOD	5	10	47	134	0	243.95	7703600000	APOD	347	27
E7ESK7;D0PNI1;E7EX29;P63104;Q6LD62;E5RIR4;E9PD24;E7EVZ2;E5RGE1	YWHAZ;14-3-3 protein	11	3	30.7	9	0	60.197	28960000	YWHAZ	7534	346
D6RFH2;D6RDN0;D6R9V8;H0Y8K3;D3DND1;Q9UKY7-3;Q9UKY7-2;Q9UKY7	CDV3	8	1	21.3	1	0.0080257	7.6141	7323600	CDV3	55573	483
D3DP16	FGG	3	1	69.5	14	0.0078989	7.3258	544410000	D3DP16	NA	110
D3DQX7;E9PQD6	SAA1	2	2	60.7	57	0	265.82	1157800000	D3DQX7	NA	75
H7BXV5;D3DSM4;D3DSM5;P39060-2;P39060-1;P39060;Q8NG19;H7C457	COL18A1	8	7	10.9	17	0	65.249	41849000	COL18A1	80781	307
U3KPS2;D6CHE9;P24158	PRTN3	3	2	9.3	2	0.0018215	11.802	13751000	PRTN3	5657	428
D6RB12;Q9BUD6	SPON2	2	2	9.3	2	0	12.45	10492000	SPON2	10417	455
D6RCE7	ALB	1	2	15.2	3	0	13.584	16930000	D6RCE7	NA	414
D6RD58;O14960;D6RGX8;E5RHW6	LECT2	4	2	21.5	5	0	17.132	177060000	LECT2	3950	184
D6RF35;D6RBJ7	GC	6	1	41.8	67	0	323.31	454240000	GC	NA	119
D6RF86;P55285-2;P55285	CDH6	8	7	13.8	20	0	82.432	45293000	CDH6	1004	301
D6RIG4;Q9HCL0-2;Q9HCL0	PCDH18	4	3	2.6	4	0	23.587	1345400	PCDH18	54510	632
Q15657;D9YZV5;P09493-3;H0YKX5;A0A0K0K1I0;P09493-2;P09493-4;P09493-10;P09493-9;Q8TCG4;H0YL52;D9YZV4;A0A0S2Z4G6;P09493	TPM1	21	0	25.9	1	0	19.682	577400	Q15657	7168	679
D9ZGG2;P04004	VTN	7	18	35.6	394	0	323.31	16300000000	VTN	7448	12
G3XAM2;E7ETH0;P05156;A8K3L0;B4DRF2;A0A0U4BCF5;Q8WW88;A0A087X0I2	CFI	11	3	22.2	25	0	122.36	62290000	CFI	3426	276
E9KL23;P01009;P01009-2;P01009-3	SERPINA1	7	1	34.7	6	0	53.237	70809000	E9KL23	5265	263
Q5UGI6;H9KV48;E9KL26;E9PGN7;P05155-2;P05155;P05155-3	SERPING1	9	8	25.5	27	0	120.15	242680000	SERPING1	710	158
Q5J875;E9PG08;Q9UGM5-2;Q9UGM5;B7Z8T3	GUGU;FETUB	8	5	19.2	11	0	42.386	40156000	GUGU	26998	316
F2RM37;P00740;F2RM35;P00740-2	F9 p22;F9;factor IX F9	38	13	33.4	41	0	323.31	440740000	F9 p22	2158	120
Q53GA7;F5H5D3;Q9BQE3;B3KT06;B3KPS3;Q1ZYQ1;A8JZY9;B7Z1K5;Q71U36-2;Q13748-2;Q13748;Q71U36;P68363;B4DDU2;Q8N532;Q9UQM3;B4DQK4;F8VQQ4;C9J2C0;Q7Z3M3;P68363-2;Q9NY65-2;Q9NY65;Q6PEY2	TUBA1C;TUBA2;TUBA1A;TUBA3C;TUBA1B;TUBA8;DKFZp686L04275;TUBA3E	37	2	16.7	2	0	20.272	2388800	TUBA1C	84790	587
Q96KY9;F8VVI9;J3KTP3;Q9H159-2;Q9H159	CDH19	5	2	5.4	2	0	13.5	2475700	CDH19	28513	583
G1FM90;G1FM94;G1FM86		3	1	22.5	7	0	23.594	28931000	G1FM90	NA	348
G3V357;W0UV93;P07998	RNASE1;RAC1	3	2	16.4	4	0	12.84	65083000	RNASE1	6035	271
Q53GN8;G3XAK1;P26927;B7Z250	MST1	15	17	30.2	42	0	172.66	65173000	MST1	4485	270
G5E9W0;Q53H76-3;Q53H76;Q53H76-4;Q53H76-2	PLA1A	5	2	4.1	3	0	15.405	2250300	PLA1A	51365	597
H0YAC1;P03952;A8K9A9;E9PBC5;B4DMX2	KLKB1	9	27	38.9	101	0	323.31	300320000	KLKB1	3818	139
H6VRG2;H6VRG0;H6VRF8;H6VRG1;P04264;H6VRG3;H6VRF9	KRT1	7	1	51.1	89	0	323.31	552520000	KRT1	3848	108
H7BYY1;Q1ZYL5;F5H7S3;B7Z722;B7Z596;D9YZV7;H0YK48;Q59GR8;P09493-5	TPM1	11	1	25	1	0.0086505	10.4	922470	H7BYY1	7168	661
H7BZJ3;B3KQT9;B3KQT2;V9HVY3;P30101	PDIA3;HEL-S-269	5	2	21.1	2	0	12.634	2786900	PDIA3	2923	570
H7C472;P15907	ST6GAL1	2	1	9	1	0.0077882	7.1391	1754400	ST6GAL1	6480	612
I3L3H7;Q6LAN8;H9C5C5;P02452	COL1A1	5	3	18.8	7	0	61.969	198660000	COL1A1	1277	174
I3L145;P04278;I3L1J1;A0A0C4DGN2;P04278-4;B4DYU0;P04278-2;P04278-3;I3L2X4;P04278-5;I3L4B9;B0FWH6;I3L2F1;B0FWH5	SHBG	19	10	32.6	24	0	85.489	287190000	SHBG	6462	143
J3KN67;M1VPF4	TPM3;TPM3-ROS1	2	0	18.9	3	0	32.515	2746500	J3KN67	NA	574
J3KNB4;P49913	CAMP	2	2	15	6	0	15.067	40235000	CAMP	820	314
J3KQ66;P78509-3;P78509-2;P78509	RELN	5	13	4	19	0	113.59	3207500	RELN	5649	553
Q3LID3;J3QKW5;J3QLE6;J3KRI5;X6R3Y6;P55286;J3KTG8	Nbla04261;CDH8	7	2	6	2	0.0088028	10.884	4484100	Nbla04261	1006	526
K7ER74;A0A024R0T9;A0A0S2Z3C2;P02655;Q6P163	APOC4-APOC2;APOC2	7	4	26.4	65	0	86.74	15600000000	APOC4-APOC2	344	14
Q2VPJ6;K9JA46;P07900;P07900-2;Q86U12;Q8TBA7;Q96HX7;O75322	HSP90AA1;EL52	12	3	9.1	6	0	38.725	2982500	HSP90AA1	3320	559
L8E853;P04275	VWF	8	40	17.3	86	0	323.31	46756000	VWF	7450	296
M1LAK4;Q9NRN5-2;Q9NRN5;B4DNG0;Q9NRN5-3	OLFML3	5	6	15.5	8	0	47.734	10547000	OLFML3	56944	453
O00187	MASP2	2	21	33.4	79	0	323.31	409290000	MASP2	10747	124
O00391;A0A140VKE5;O00391-2;A8K477;A8K4C2;Q13876	QSOX1;BPGF-1	7	27	38.7	87	0	323.31	691420000	QSOX1	5768	98
O00602	FCN1	4	6	21.2	16	0	116.86	75741000	FCN1	2219	254
O15240;Q05BJ3	VGF	2	3	5.2	4	0	16.722	2378300	VGF	7425	589
O15467	CCL16	1	1	11.7	1	0.007837	7.1969	5061900	CCL16	6360	519
U6C5D7;O43286	B4GalT5;B4GALT5	2	1	2.1	2	0.010072	6.5163	2878900	B4GalT5	9334	563
O43866	CD5L	1	16	52.7	93	0	323.31	3467900000	CD5L	922	42
O60844	ZG16	1	2	20.4	3	0	65.705	12035000	ZG16	653808	441
O75594	PGLYRP1	1	1	8.2	1	0.010101	6.5197	1651000	PGLYRP1	8993	616
O75612;Q86SR3;X6R868;P19835-2;P19835;B4DSX9	CEL	6	2	4.4	2	0	14.939	2276300	CEL	1056	594
O75636;Q6UY50;Q6UXM4;O75636-2	FCN3;UNQ172	4	9	28.8	96	0	158.87	3540000000	FCN3	8547	41
O76076	WISP2	2	3	20.4	5	0	22.002	5559900	WISP2	8839	508
O95428-6;O95428-5;O95428;O95428-4;G3V5P6;B9EGP7;B5MDP7	PAPLN	12	18	18.4	33	0	181.45	25780000	PAPLN	89932	365
O95445-2;O95445;Q5SRP5;I2D5J2;I2D5I8	APOM	5	6	56.9	21	0	54.99	1463400000	APOM	55937	63
O95450-2;O95450	ADAMTS2	2	1	1.9	2	0	16.104	1304900	ADAMTS2	9509	634
P00451;A0A127R638;P00451-2	F8	10	6	2.8	12	0	86.21	2829900	F8	2157	565
P00734;E9PIT3;B4DDT3;Q69EZ8	F2	9	39	60.3	721	0	323.31	11800000000	F2	2147	19
P00738;A0A0C4DGL8;J3QR68;H0Y300;P00738-2;J3QLC9;Q6NSB4;A0A087WU08;Q6PEJ8;B3KP77	HP	20	9	42.6	103	0	323.31	1204900000	HP	3240	71
P00739;P00739-2;A0A0A0MRD9	HPR	4	3	37.6	9	0	79.089	40991000	HPR	3250	311
Q5JVE7;P00742	F10	5	12	31.1	45	0	231.61	219200000	F10	2159	165
P00747;B2R7F8	PLG	13	50	53.2	333	0	323.31	4661100000	PLG	5340	34
P00748	F12	1	1	24.4	5	0.0086207	10.354	2879000	F12	2161	562
P01023	A2M	9	35	33.6	266	0	323.31	1060400000	A2M	2	78
V9HWA9;P01024;B4E216	HEL-S-62p;C3	11	91	50.6	491	0	323.31	2037400000	HEL-S-62p	718	54
P01031	C5	3	31	18.1	73	0	323.31	58610000	C5	727	280
P01344-2;E3UN46;A8K6C9;P01344;P01344-3	IGF2	5	2	18	13	0	44.566	579390000	IGF2	3481	106
P01591;D6RD17;D6RHJ6	IGJ;JCHAIN	4	8	49.1	53	0	183.96	6089800000	IGJ	3512	29
P01594		1	1	31.5	1	1	-2	2010800	P01594	NA	605
P01604		1	1	10.2	3	0.0081566	8.0989	41389000	P01604	NA	308
P01608		1	1	24.1	9	0.0077399	7.1139	187640000	P01608	NA	179
P01609		1	1	27.8	2	0	21.548	40459000	P01609	NA	313
P01611;A0A109PSY4		2	2	31.5	1	0	70.059	9483000	P01611	NA	466
P01615		1	1	11.5	2	0	12.443	33532000	P01615	NA	332
P01620;G3GAU4;A2NB46;P01623		4	1	45	4	0	21.896	18637000	P01620	NA	403
P01624		1	1	31.2	1	0.0087566	10.731	3077900	P01624	NA	557
P01625		1	1	47.4	12	0	58.547	37565000	P01625	NA	323
P01708		1	1	10.1	2	0.010116	6.527	57726000	P01708	NA	282
P01714;A2N2W9;Q5NV73;Q9NSD6;A0A075B6J8	VL4;V2-13;IGLV3-19	5	2	34.3	3	0	11.876	22994000	VL4	NA	374
P01767		1	1	26.1	4	0	16.414	59457000	P01767	NA	278
P01771		1	1	15.7	3	0.0076453	6.8991	207560000	P01771	NA	170
P01773		1	1	9.2	3	0	16.007	46146000	P01773	NA	297
P01778		1	1	16.4	1	0	16.094	6152600	P01778	NA	500
P01780		1	1	16.5	3	0	16.722	21398000	P01780	NA	384
P01781		2	2	32.8	12	0	42.359	145490000	P01781	NA	203
P01833	PIGR	1	10	13.4	20	0	115.95	20499000	PIGR	5284	389
V9GYE3;V9GYG9;V9GYM3;P02652	APOA2	6	5	42.3	87	0	51.938	34100000000	APOA2	336	5
P02671;P02671-2;A0A0S2Z3E8	FGA	9	61	63.6	2617	0	323.31	58900000000	P02671	2243	3
V9HVY1;P02675;B4E1D3;D3DP13;D6REL8	HEL-S-78p;FGB	5	41	68	1691	0	323.31	59700000000	HEL-S-78p	2244	2
P02679;A0A140VJJ6;P02679-2;Q7Z664	FGG;DKFZp779N0926	4	0	65.8	1784	0	323.31	46600000000	P02679	2266	4
P02741	CRP	3	5	17.4	43	0	75.646	3102900000	CRP	1401	45
V9HWP0;P02743	HEL-S-92n;APCS	2	7	28.3	51	0	323.31	2258800000	HEL-S-92n	325	48
P02760;B7Z8R6;S4R3Y4	AMBP	6	13	39.8	59	0	323.31	1017500000	AMBP	259	79
V9HWF6;P02763	HEL-S-153w;ORM1	2	4	23.4	8	0	60.637	115990000	HEL-S-153w	5004	218
P02775;D3JV42;D3JV41;D3JV43	PPBP	4	7	50.8	31	0	102.75	806950000	PPBP	5473	85
P02776	PF4	1	1	42.6	79	0	80.238	14300000000	PF4	5196	16
P02790;Q9BS19	HPX	3	13	32.3	48	0	170.63	166520000	HPX	3263	189
W0UV28;P03950	RAA1;ANG	2	9	51.7	51	0	125.78	1460000000	RAA1	283	64
P03951;P03951-2	F11	6	21	33	48	0	211.92	70149000	F11	2160	265
P03973	SLPI	1	5	37.9	12	0	49.428	302410000	SLPI	6590	138
P04196	HRG	1	2	32.6	82	0	310.27	1454900000	HRG	3273	65
P04208		1	1	22	1	0.0084317	9.3201	19603000	P04208	NA	396
P04209		1	2	14.3	3	0	27.469	162440000	P04209	NA	191
V9HWD8;P04217;M0R009;B3KP79;P04217-2	HEL-S-163pA;A1BG	6	9	23	26	0	208.08	131330000	HEL-S-163pA	1	209
V9HVZ4;P04406;Q0QET7;Q2TSD0;P04406-2;A4UCT1;E7EUT5;B4DRV9	HEL-S-162eP;GAPDH	9	8	31.9	18	0	138.07	59283000	HEL-S-162eP	2597	279
Q9NP10;Q13429;Q5U743;Q59GC5;P05019-3;P05019-2;P05019-4;P05019	IGF1;IGF-I	8	3	22.3	7	0	91.053	341320000	IGF1	3479	133
P05109	S100A8	1	4	39.8	7	0	30.455	21459000	S100A8	6279	382
P05160	F13B	2	28	43.6	129	0	323.31	654300000	F13B	2165	100
P05164-2;P05164;P05164-3	MPO	5	11	17.4	18	0	82.57	21718000	MPO	4353	381
P05546;Q8IVC0	SERPIND1	3	11	22.4	34	0	141.13	116020000	SERPIND1	3053	217
P06312;P06313;P83593	IGKV4-1	3	1	29.8	11	0	135.34	834850000	IGKV4-1	NA	83
Q5JP69;Q53HP3;P06681;B4DV48;A0A0G2JL69;Q53GZ8;P06681-3;A0A0G2JIE7;H0Y3H6;Q95IG1;P06681-2;A0A0G2JK28;B4DQI1	C2	17	2	9	2	0.0035971	11.55	598070	C2	717	677
P06727;Q13784	APOA4	2	41	79.8	695	0	323.31	25600000000	APOA4	NA	8
P06889		1	1	23.6	3	0.010386	6.6941	43864000	P06889	NA	302
Q7Z4G9;P07307-3;P07307-2;P07307	HBXBP;ASGR2	4	4	10.8	17	0	23.266	184210000	HBXBP	433	182
P07357	C8A	2	15	27.9	43	0	288.92	104810000	C8A	731	228
P07360;Q5SQ08	C8G	2	4	27.2	11	0	76.382	41937000	C8G	733	306
P08311	CTSG	1	2	10.6	3	0	15.801	3567200	CTSG	1511	548
Q1HP67;P08519	LPA	9	17	26.1	40	0	207.98	105020000	LPA	NA	227
P08603	CFH	3	0	54.9	832	0	323.31	8785600000	CFH	3075	22
P08697;P08697-2;A0A0G2JPA8;C9JMH6	SERPINF2	8	11	22.2	46	0	323.31	491710000	SERPINF2	5345	115
P09382	LGALS1	3	6	40.7	10	0	43.005	31058000	LGALS1	3956	339
P09493-8;A0A024R5W6;P09493-7;H0YNC7;P09493-6	TPM1	6	0	26.1	10	0	39.55	11803000	P09493-8	7168	443
P0C0L4;P0C0L4-2;B4DIE5	C4A	4	1	41.2	16	0	53.647	121550000	C4A	720	215
P0C0L5;F5GXS0;A0A140TA44;A0A0G2JL54	C4B	7	2	42.1	1633	0	323.31	12400000000	C4B	100293534	18
P0DJI8	SAA1	1	2	60.7	20	0	59.156	166790000	P0DJI8	6288	188
P0DJI9	SAA2	1	4	54.9	32	0	88.981	357630000	SAA2	6289	132
P10645;G5E968;Q86T07	CHGA	3	7	21.2	15	0	66.885	25751000	CHGA	1113	367
P10720	PF4V1	1	1	45.2	10	0	39.27	259010000	PF4V1	5197	153
P10909-4;P10909;P10909-5;P10909-2;H0YLK8;P10909-3;E7ETB4;H0YC35	CLU	18	22	58.4	1186	0	323.31	21200000000	CLU	1191	10
V9HWB4;P11021;B4DEF7	HEL-S-89n;HSPA5	3	14	26.5	31	0	192.82	32977000	HEL-S-89n	3309	334
P11226	MBL2	1	6	22.6	23	0	80.594	257710000	MBL2	4153	154
P12838	DEFA4	1	2	21.6	3	0	12.352	13148000	DEFA4	1669	434
P14543;P14543-2	NID1	6	19	18.3	32	0	256.3	19949000	NID1	4811	394
Q5CAQ5;V9HWP2;P14625;B4DHT9;B4DU71;Q59FC6	TRA1;HEL-S-125m;HSP90B1	12	19	24.2	48	0	264.82	73102000	TRA1	7184	259
P15169	CPN1	3	7	15.1	16	0	52.975	74768000	CPN1	1369	257
P18065;C9JMY1;Q59FF1	IGFBP2	4	10	37.2	19	0	105.9	121090000	IGFBP2	3485	216
Q8TCF0;P18428	LBP	2	8	16.6	36	0	80.115	543310000	LBP	3929	111
Q53FL7;P19320-3;P19320;F8UV74;F2YYR6;E9PDD2;P19320-2	VCAM1	7	2	2.7	3	0	14.148	1371100	VCAM1	7412	628
P19652	ORM2	1	2	13.4	15	0	17.298	19917000	ORM2	5005	395
P19827;B7Z539;B7Z549;P19827-2	ITIH1	11	12	13.9	49	0	323.31	201510000	ITIH1	3697	173
Q86SR2;P20160	AZU1	2	2	10.6	3	0	15.051	8971900	AZU1	566	468
P20851-2;P20851;Q5VVQ7;B4DDY0	C4BPB	4	10	34.3	59	0	146.73	1943400000	C4BPB	725	55
P22792	CPN2	1	7	15.6	20	0	102.96	53125000	CPN2	1370	286
P23083		1	1	47.9	10	0	50.792	123260000	P23083	NA	214
P23142;Q8NBH6	FBLN1	4	9	38.3	131	0	323.31	1465600000	P23142	2192	62
P24387;D6RHH7	CRHBP	2	6	22.4	11	0	44.555	17960000	CRHBP	1393	408
P24592;F8VYK9	IGFBP6	2	2	9.6	2	0	15.253	3000500	IGFBP6	3489	558
P25398	RPS12	1	1	11.4	1	0	25.773	4569100	RPS12	6206	523
P27169;B4DX19	PON1	5	9	30.1	212	0	323.31	8486900000	PON1	5444	24
Q53G71;V9HW88;P27797;B4DHR1;K7EJB9;B4E2Y9	HEL-S-99n;CALR	11	6	16	21	0	60.765	102110000	HEL-S-99n	811	230
Q6IAT9;P28072	PSMB6	2	1	4.6	1	0.0080515	7.776	1747000	PSMB6	5694	613
V9HWC7;P30041	HEL-S-128m;PRDX6	3	3	14.3	3	0	17.675	4393700	HEL-S-128m	9588	531
Q59EA3;P33151;B4DU18;Q4VAI4;P33151-2;I3L1J2	CDH5	8	15	20.9	85	0	323.31	608350000	CDH5	1003	105
P33908	MAN1A1	2	3	5.2	4	0	18.795	951100	MAN1A1	4121	658
Q53XB4;P34096	RAB1;RNASE4	2	8	45.6	35	0	196.53	739860000	RAB1	6038	93
P35555;Q75N88	FBN1	14	35	14.6	58	0	323.31	14650000	FBN1	2200	423
V9GYE7;P36980;P36980-2	CFHR2	4	5	33.9	19	0	52.931	105760000	CFHR2	3080	226
P43251-4;P43251;P43251-3;P43251-2	BTD	4	2	4.8	4	0	37.469	2511800	BTD	686	581
P43652	AFM	2	20	28.4	45	0	215.17	76694000	AFM	173	253
P48061-2;P48061-5;P48061;P48061-6;P48061-3;P48061-4	CXCL12	6	3	33.7	5	0	59	41988000	CXCL12	6387	305
P48740	MASP1	5	9	31.9	122	0	323.31	883270000	P48740	5648	81
P48740-2;P48740-4;Q5HYM1	MASP1;DKFZp686O1553	5	5	25.3	20	0	88.957	133320000	P48740-2	NA	206
Q6FH59;P49767	VEGFC	2	2	3.8	4	0.0036232	11.721	4428800	VEGFC	7424	529
P49908	SEPP1	3	8	16.5	20	0	79.544	469000000	SEPP1	6414	118
Q53FV4;P51884	LUM	3	11	33.4	33	0	135.74	360900000	LUM	4060	129
P55056	APOC4	1	1	42.5	1	1	-2	988340	P55056	346	657
Q9NTC4;Q0IIN5;Q96IF9;V9HW80;P55072;Q9HAP0	DKFZp434K0126;VCP;HEL-S-70	6	2	4.9	3	0	13.748	3196600	DKFZp434K0126	7415	554
Q96CZ9;Q59EQ1;P55287-2;P55287;B4DMA7;H3BUU9	CDH11	8	10	12.9	23	0	116.04	45478000	CDH11	1009	300
P55291	CDH15	1	2	3.3	2	0	12.193	1175100	CDH15	1013	644
P55774	CCL18	1	4	51.7	8	0	29.342	96790000	CCL18	6362	234
P58166;F8VNP4	INHBE	2	6	19.4	8	0	37.301	5716600	INHBE	83729	505
Q6EZE9;P59666;P59665	DEFA3;DEFA1	3	1	9.6	1	0.0099432	6.4334	15277000	DEFA3	1668	422
Q9BS10;Q5JR95;Q5JR94;P62241	RPS8	4	1	16.2	1	0.0082237	8.4246	4479900	RPS8	6202	527
V9HW56;P67936;B4DVY2;B4DTB1;P67936-2;K7ENT6	HEL-S-108;TPM4	12	8	41.9	30	0	138.97	98147000	HEL-S-108	7171	232
P68366-2;P68366;C9JEV8;C9JQ00;C9JJQ8	TUBA4A	6	3	18.9	8	0	67.024	5442500	TUBA4A	7277	510
P80108	GPLD1	2	19	23	86	0	323.31	514130000	GPLD1	2822	113
P80748		1	2	45.9	4	0	13.945	11606000	P80748	NA	444
P81605;P81605-2	DCD	2	1	10	4	0	16.372	14642000	DCD	117159	424
Q01523	DEFA5	1	1	12.8	2	0	14.856	32924000	DEFA5	1670	335
Q01524	DEFA6	1	1	10	1	0.0036101	11.577	3171000	DEFA6	1671	555
Q02985-2;Q02985;Q8WW96;A0A087WYK9;Q6NSD3	CFHR3	6	1	32.7	14	0	65.926	172710000	CFHR3	10878	185
Q03591;B1AKG0	CFHR1	2	3	36.1	109	0	323.31	7957300000	CFHR1	3078	26
Q04721	NOTCH2	3	6	2.6	11	0	66.855	2269400	NOTCH2	4853	595
Q06033-2;Q06033;A0A087WW43;E7ET33;B4DPQ4	ITIH3	6	14	19	40	0	323.31	286880000	ITIH3	3699	144
Q07954;Q59FG2	LRP1	6	22	5.1	30	0	157.75	2413200	LRP1	4035	585
Q08397;B4E1T8	LOXL1	3	4	7.1	6	0	26.274	8937800	LOXL1	4016	469
Q08830;D3DSP9	FGL1	2	9	30.8	35	0	139.54	267700000	FGL1	2267	147
Q0KKI6;Q8TCD0		7	1	49.3	12	0	69.448	1178600000	Q0KKI6	NA	74
Q0PNF2;Q9NY15;Q9NY15-2	STAB1	3	11	4.8	20	0	84.465	4404300	STAB1	23166	530
Q0ZCF6		1	0	17.8	3	0	21.623	84851000	Q0ZCF6	NA	243
Q0ZCH9;A0A0X9USM3;Q9UL91		3	1	47.1	1	0	92.778	4071500	Q0ZCH9	NA	538
Q0ZCI2		1	2	27	3	0.0089127	11.223	24014000	Q0ZCI2	NA	373
Q0ZCI6		1	0	32.8	1	0.010145	6.5391	5949600	Q0ZCI6	NA	501
Q0ZCJ1		1	1	40.5	4	0.010264	6.6217	34346000	Q0ZCJ1	NA	330
Q13103;C9J6K0	SPP2	2	6	27	28	0	123.01	707470000	SPP2	6694	97
Q13201;E7EPG1;B7Z7R8;Q13201-2	MMRN1	4	15	14.3	28	0	190.22	13553000	MMRN1	22915	429
Q14126	DSG2	2	9	9.9	26	0	225.54	37100000	DSG2	1829	324
Q14520-2;Q14520	HABP2	3	19	35.2	132	0	323.31	3308100000	HABP2	3026	43
Q14766;Q14766-4;E7EV71;B7ZLY3;Q14766-3;Q14766-2;Q14766-5;C9JD84	LTBP1	23	22	16.8	47	0	323.31	33900000	LTBP1	4052	331
Q15113;A4D2D2	PCOLCE	2	9	41.4	64	0	323.31	358800000	PCOLCE	5118	130
Q15166;F8WD41	PON3	4	7	24.6	24	0	111.82	82136000	PON3	5446	248
Q15430	F5	1	1	18.6	3	0	14.734	28249000	Q15430	NA	353
Q15485;Q15485-2	FCN2	3	10	29.1	62	0	171.1	1854700000	FCN2	2220	56
Q16270-2;Q16270;A0A024RDA6	IGFBP7	3	5	25.1	9	0	55.134	16177000	IGFBP7	3490	417
Q16769;B5MCZ9;Q16769-2	QPCT	3	3	10	5	0	22.337	13387000	QPCT	25797	432
Q3SXP2;Q7Z5L0	VMO1	2	3	24.5	4	0	23.489	16838000	VMO1	284013	415
Q53H26;Q06AH7;P02787;A0A0K0K1H8;B4DI57;B4DHZ6	TF	6	1	55.4	161	0	323.31	785570000	TF	7018	89
Q567P1;Q6GMX3	IGL@	6	0	43.8	8	0	56.78	131630000	Q567P1	NA	207.5
Q5CZ94	DKFZp781M0386	1	1	37.6	3	0.010219	6.5568	13531000	DKFZp781M0386	NA	430
Q5EFE6		2	1	43.6	3	0	91.011	21219000	Q5EFE6	NA	386
Q5FWF9	IGL@	3	1	44.8	28	0	42.74	1200000000	Q5FWF9	NA	73
Q5IWS5;Q8WWA0	ITLN1	4	5	15.3	8	0	49.063	39027000	ITLN1	55600	320
Q5NV90;A0A075B6J4	V2-17;IGLV3-25	2	1	50.5	10	0	20.086	640520000	V2-17	NA	102
Q5NV91;A0A075B6J3	V2-19;IGLV3-27	2	1	42.1	4	0	27.937	93841000	V2-19	NA	236
Q5VYK3;R4GMY1;B3KXF2;J3KN16	ECM29;KIAA0368	4	2	1.5	2	0.0087108	10.704	780020	ECM29	23392	670
Q6GMW4	IGL@	3	0	38.2	4	0.0084746	9.9013	260840000	Q6GMW4	NA	151
Q6GMX0		1	0	45.3	1	0.007874	7.2341	432310	Q6GMX0	NA	682
Q6GMX4	IGL@	3	1	43.6	6	0	25.928	41080000	Q6GMX4	NA	310
Q6GMX6	IGH@	10	2	40.4	14	0	63.79	53497000	Q6GMX6	NA	285
Q6IN99	IGL@	1	1	43.8	2	0.010029	6.5007	27169000	Q6IN99	NA	362
Q6LAM1		1	1	32.4	2	0	29.794	7029400	Q6LAM1	NA	486
Q6MZQ6;Q6N094;Q6N097	DKFZp686G11190;DKFZp686O01196;DKFZp686H20196	3	0	40.8	8	0	41.649	130990000	DKFZp686G11190	NA	210
Q6MZX9;Q6ZVX0	DKFZp686M08189	2	0	26.3	3	0	17.223	36522000	DKFZp686M08189	NA	325
Q6N089	DKFZp686P15220	3	0	36.2	17	0	16.282	110080000	DKFZp686P15220	NA	221
Q6N091;Q6N041	DKFZp686C02220;DKFZp686O16217	2	0	18.6	3	0	26.346	14580000	DKFZp686C02220	NA	425
Q6N092;Q96DK0	DKFZp686K18196	2	0	32.2	6	0	27.509	193730000	DKFZp686K18196	NA	175
Q6N093;Q68CN4	DKFZp686I04196;DKFZp686E23209	2	0	25.7	33	0	148.84	2372200000	DKFZp686I04196	NA	47
Q6N095	DKFZp686K03196	1	1	33.5	5	0.008489	9.9549	157940000	DKFZp686K03196	NA	194
Q6P089	IGH@	1	1	24.2	6	0	16.527	18020000	Q6P089	NA	406
Q6P2J1		1	0	34	4	0.0078616	7.2338	226850000	Q6P2J1	NA	163
Q6P528;Q9BXN1	ASPN	2	4	10.7	8	0	25.568	5230000	ASPN	54829	516
Q6P5S8	IGK@	3	0	41.1	8	0.0086059	10.339	1359600000	Q6P5S8	NA	69
Q6PIK1;A0A0B4J231;Q6GMW6;Q96E61;Q6P5S3;Q6GMV7;B9A064;A0M8Q9;A0A075B6K8;Q6DHW4;P0CG04	IGL@;IGLL5;C1 segment;IGLC1	11	1	40.9	58	0	82.71	2176500000	Q6PIK1	100423062	50
Q6PIL8	IGK@	1	2	50.4	8	0	48.115	52729000	Q6PIL8	NA	288
Q6PIQ7;Q6GMW3;Q8TCJ5;A0A075B6L0;A0A075B6K9;Q6PJR7;Q7Z2U7;P0CG05;S6C4S2;P0CG06	IGL@;DKFZp667J0810;IGLC3;IGLC2	11	1	43.6	13	0	13.111	1092400000	Q6PIQ7	NA	77
Q6PJG0		2	0	40.4	6	0.0078864	7.3174	549850000	Q6PJG0	NA	109
Q6UVK1	CSPG4	1	3	2	3	0	20.581	416190	CSPG4	1464	684
Q6UWP8	SBSN	1	2	15.3	2	0	12.561	579580	SBSN	374897	678
W5VK78;W5VKF7;Q6UXH0;K7EJY6;K7EIY2;Q29RX7	C19orf80;LOC55908	6	3	22	6	0	18.928	22712000	C19orf80	55908	377
Q6UY14;Q6UY14-3;B7ZMJ3;Q6UY14-2	ADAMTSL4	8	16	18.1	38	0	179.64	41331000	ADAMTSL4	54507	309
Q6Y2K7		1	1	13.9	10	0.0078125	7.1705	720310000	Q6Y2K7	NA	95
Q76LX8	ADAMTS13	11	1	19.7	4	0	46.5	4338400	Q76LX8	11093	533
Q76LX8-2;Q76LX8-3;A0A024R8G4	ADAMTS13	3	1	20.4	72	0	323.31	76953000	Q76LX8-2	NA	252
Q86TT1		1	2	53.6	4	0	150.28	7600300	Q86TT1	NA	482
Q86UD1;E9PJ29	OAF	2	4	15.4	14	0	29.491	110030000	OAF	220323	222
S4R3V8;Q86X29-6;Q86X29-5;Q86X29-4;Q86X29;Q9BWS2;Q86X29-2	LSR	7	1	11.8	8	0	72.252	10480000	LSR	51599	456
Q86Z09	FGA	1	1	80.3	1	1	-2	192320000	Q86Z09	NA	176
Q8N355	IGL@	6	0	48.7	6	0	105.74	129520000	Q8N355	NA	211
Q8N5F4	IGL@	1	0	45.5	283	0	323.31	22300000000	Q8N5F4	NA	9
Q8NBP7	PCSK9	4	10	16	26	0	125.19	30381000	PCSK9	255738	343
Q8NEJ1		1	2	50.8	24	0	54.854	806710000	Q8NEJ1	NA	86
Q8NF20;A0A087WUS7;A0A0A0MS09;P01880;P01880-2	FLJ00382;IGHD	5	6	16	20	0	89.848	62472000	FLJ00382	NA	275
Q8TF21;Q8TF21-2;D6W623;M0QZ18	ANKRD24;hCG_1811453	4	2	2.1	2	0.0088339	10.991	1272500	ANKRD24	170961	637
Q8WTU2-2;Q8WTU2	SSC4D	2	1	4.4	2	0.0091185	6.8239	1393900	SSC4D	136853	625
Q8WWQ8	STAB2	1	4	1.9	4	0	29.406	785550	STAB2	55576	669
Q8WWZ8	OIT3	2	13	23.9	29	0	137.78	46113000	OIT3	170392	298
Q92496-2;Q92496;A0A0C4DH21;Q92496-3	CFHR4	4	3	17.5	11	0	53.869	38287000	CFHR4	10877	321
Q92626;H7C1W1;Q92626-2	PXDN	5	5	3.7	6	0	30.347	1569700	PXDN	7837	618
Q92743;Q05DJ8;B3KRN4	HTRA1	5	9	19.6	15	0	61.073	20155000	HTRA1	5654	392
Q96K68;Q9UP60;Q8NCL6;Q6N090;Q6MZW0;P01876;Q8WY24	SNC73;DKFZp686G21220;DKFZp686J11235;IGHA1	7	2	38.3	98	0	214.9	4928600000	SNC73	NA	33
Q96PD5;Q96PD5-2	PGLYRP2	3	8	20.7	33	0	253.44	84017000	PGLYRP2	114770	244
Q99674;Q99674-4;Q99674-5	CGREF1	3	3	10	4	0	23.349	2753000	CGREF1	10669	573
Q99988	GDF15	1	1	3.9	2	0.010234	6.597	1511300	GDF15	9518	620
Q9BWP8-8;Q9BWP8-7;Q9BWP8-6;Q9BWP8-5;Q9BWP8-4;Q9BWP8-3;Q9BWP8-2;Q9BWP8-9;Q9BWP8;Q9BWP8-10	COLEC11	10	7	43.1	19	0	97.029	774360000	COLEC11	78989	90
Q9BXJ4-3;E9PGA6;Q59G48;Q9BXJ4;B3KXI7;Q9BXJ4-2	C1QTNF3;C1QTNF3-AMACR	6	4	13.2	8	0	30.897	28958000	C1QTNF3	114899	347
Q9H4B7	TUBB1	1	2	8.6	5	0	24.794	4816000	TUBB1	81027	521
Q9H804;Q9NZP8;F5GWF3	C1RL	8	2	7.3	5	0	13.823	6177400	C1RL	51279	499
Q9HCB6	SPON1	3	3	3.2	5	0	17.852	2066800	SPON1	10418	602
Q9HCC1		1	2	36.6	4	0	13.992	17820000	Q9HCC1	NA	410
Q9HCE6-5;Q9HCE6;B4DTE2;B3KX74;B4DTL3;Q5VXI4;Q9HCE6-4;Q9HCE6-3;Q9HCE6-2	ARHGEF10L	9	2	1.5	2	0.0086806	10.606	2107200	ARHGEF10L	55160	601
Q9HCU4	CELSR2	1	1	0.4	1	0.007716	7.0434	252370	CELSR2	1952	689
Q9HD89	RETN	1	2	21.3	7	0	26.698	30881000	RETN	56729	342
Q9HDC9;H0Y512;Q9HDC9-2	APMAP	3	11	23.3	35	0	145.21	115240000	APMAP	57136	219
Q9NPP6;A0A0G2JMB2;Q7Z374;P01877;Q7Z379	DKFZp686C02218;IGHA2;DKFZp686K04218	5	0	27.9	6	0	17.133	154070000	DKFZp686C02218	NA	197
Q9UHG2	PCSK1N	1	4	18.8	9	0	41.707	12259000	PCSK1N	27344	438
Q9UL72		3	1	38.1	2	0	16.111	28037000	Q9UL72	NA	356
Q9UL82		1	2	37.4	7	0	16.213	363380000	Q9UL82	NA	127
Q9UL83		1	0	42.6	10	0	174.61	437000000	Q9UL83	NA	121
Q9UL88		1	3	40.5	6	0	87.551	17995000	Q9UL88	NA	407
Q9UL89		1	0	40.5	13	0	86.537	139020000	Q9UL89	NA	204
Q9UL90		1	0	46	16	0	33.311	689130000	Q9UL90	NA	99
Q9UM47;M0R3C9;Q59FL3	NOTCH3	3	9	4.1	14	0	113.36	2766100	NOTCH3	4854	571
Q9UN70-2;Q9UN70;A0A087X1P2	PCDHGC3	3	3	3.7	4	0	17.84	2727400	PCDHGC3	5098	576
Q9Y490	TLN1	4	12	5.2	14	0	96.073	1433300	TLN1	7094	622
Q9Y509	VH3	1	1	15.6	5	0	25.914	80004000	Q9Y509	NA	250
S6BGF9;S6AWE6;S6B286		3	0	37.6	13	0	13.681	502860000	S6BGF9	NA	114
S6AWF4		1	0	28.3	10	0	12.743	1411700000	S6AWF4	NA	68
S6B291		6	0	35.2	9	0	34.867	191410000	S6B291	NA	177
S6B2B6		2	2	16	3	0	21.068	20358000	S6B2B6	NA	391
S6BAR0		1	2	37	9	0	12.945	50722000	S6BAR0	NA	291
S6BGD4		1	1	17.1	6	0	156.21	131630000	S6BGD4	NA	207.5
S6BGD6		1	1	49.4	8	0	39.568	31034000	S6BGD6	NA	340
S6BGF5		2	0	26.2	7	0	21.452	185710000	S6BGF5	NA	180
S6C4Q9		1	2	30	3	0.008881	11.182	40980000	S6C4Q9	NA	312
V9HW34	HEL-213	1	3	46.8	180	0	323.31	6639100000	HEL-213	NA	28
