# Supplementary material for: An Integrated Transcriptomic and Proteomic Analysis Identifies Significant Novel Pathways for Henoch-Schönlein Purpura Nephritis Progression
Source: Biomed Res Int. 2020 Jun 19;2020:2489175. doi: 10.1155/2020/2489175 (PMC7322592; doi:10.1155/2020/2489175)
Supplement: Supplementary Materials — .Supplementary Figure S1: images of renal pathological sections of HSPN patients. (A) Type 1. (B) Type 2. (C) Type 3. Supplementary Figure S2: PCA score plots for discriminating samples within the different groups. Supplementary Figure S3: correlation analysis of differentially expressed mRNAs and proteins between different types of HSPN. Supplementary Table S1: list of quantitated 24,493 mRNAs and 592 proteins. Supplementary Table S2: list of differentially expressed mRNAs between different HSPN types. Supplementary Table S3: list of differentially expressed proteins between different HSPN types. Supplementary Table S4: list of DEGs which were differentially expressed between HSPN type 1 and HSPN type 2 and HSPN type 2 and HSPN type 3. Supplementary Table S5: the significant pathways enriched by DEGs between different HSPN types. Supplementary Table S6: the correlation coefficients between differentially expressed genes in four pathways and clinical biochemical indicators. Supplementary Table S7: list of mRNAs and proteins selected for validation. Supplementary Table S8: the significant pathways enriched by downregulated DEGs between HSP and HSPN. Supplementary Table S9: list of differentially expressed mRNAs between HSP and HSPN. Supplementary Table S10: the differentially expressed genes in four pathways negative regulation of the JAK-STAT cascade and so on. [file 2489175.f1.zip › Supplementary Table S2.xlsx]

## Sheet: Type 1 vs Type 2
Supplementary Table S2 List of differentially expressed mRNAs between different HSPN types
Trans_Name	Gene name	Track_id	Locus	Strand	Fold change	p_value
RGS10-202	RGS10	ENST00000369103.2_1	chr10:121259437-121302220	-	102.482	6.72127e-05
PTMA-201	PTMA	ENST00000341369.11_1	chr2:232573226-232578246	+	91.0497	2.60155e-05
KIF2A-202	KIF2A	ENST00000401507.7_1	chr5:61601989-61681503	+	81.2658	0.000271175
HLA-C-201	HLA-C	ENST00000376228.9_1	chr6:31236526-31239863	-	62.8513	0.0129351
RPS3-219	RPS3	ENST00000534440.5_1	chr11:75110575-75116724	+	55.3327	0.00210279
MBNL1-221	MBNL1	ENST00000495875.6_1	chr3:151986709-152150706	+	48.5142	0.000345139
ITGB1-201	ITGB1	ENST00000302278.7_1	chr10:33189320-33247137	-	44.6135	0.00258112
FTH1-207	FTH1	ENST00000532601.1_1	chr11:61732073-61734638	-	42.6608	0.0160409
FKBP8-201	FKBP8	ENST00000222308.8_3	chr19:18642572-18654334	-	38.6309	0.00311834
WBP2-201	WBP2	ENST00000254806.7_2	chr17:73841780-73851501	-	37.6332	0.00178172
SPARC-209	SPARC	ENST00000539687.5_1	chr5:151051131-151064791	-	36.118	0.0114251
NCOA2-205	NCOA2	ENST00000520416.1_1	chr8:71128956-71314822	-	34.5182	0.000641678
SPARC-204	SPARC	ENST00000521569.1_1	chr5:151046038-151066529	-	34.2422	2.56605e-07
THEMIS2-202	THEMIS2	ENST00000373921.7_1	chr1:28199079-28213184	+	34.0605	0.00431654
ATF4-202	ATF4	ENST00000396680.2_1	chr22:39916569-39918690	+	33.4595	9.06975e-06
ALDOA-226	ALDOA	ENST00000569798.5_1	chr16:30077093-30081673	+	33.0995	0.00240964
TYMP-201	TYMP	ENST00000252029.7_1	chr22:50964181-50968485	-	29.3314	0.000586909
HNRNPK-201	HNRNPK	ENST00000351839.7_1	chr9:86583112-86593367	-	27.5102	0.000193251
HLA-C-203	HLA-C	ENST00000383329.7_1	chr6:31236526-31239863	-	27.3591	0.0170282
TUBB-205	TUBB	ENST00000327892.12_1	chr6:30687978-30693203	+	27.3242	3.19331e-06
ARHGEF1-201	ARHGEF1	ENST00000337665.8_1	chr19:42388515-42411606	+	26.5776	0.00401497
COX5B-201	COX5B	ENST00000258424.2_1	chr2:98262503-98264846	+	25.8843	0.00969169
NAP1L1-202	NAP1L1	ENST00000393263.7_1	chr12:76440935-76478446	-	24.4227	0.0100287
GCA-204	GCA	ENST00000437150.6_1	chr2:163200598-163217930	+	23.7222	0.0106266
NUAK2-201	NUAK2	ENST00000367157.4_2	chr1:205271187-205290919	-	22.9271	0.00174719
NOTCH2NL-204	NOTCH2NL	ENST00000579793.6_1	chr1:145209119-145291654	+	22.7455	0.00964025
PSMB9-207	PSMB9	ENST00000374859.2_1	chr6:32821938-32827362	+	22.7114	0.010915
CD79A-201	CD79A	ENST00000221972.7_2	chr19:42381190-42385439	+	22.6049	0.0330054
CD74-206	CD74	ENST00000518797.5_2	chr5:149781262-149792295	-	22.5311	0.00102024
COL18A1-203	COL18A1	ENST00000359759.8_2	chr21:46875445-46933633	+	22.1676	0.0150907
MRPL20-203	MRPL20	ENST00000482352.1_1	chr1:1340489-1342670	-	21.4611	0.00126275
FLNA-209	FLNA	ENST00000444578.1_1	chrX:153579949-153581537	-	21.4267	0.0338212
HMGB2-202	HMGB2	ENST00000438704.6_1	chr4:174252852-174254823	-	21.2358	0.000994725
HIST1H2BJ-201	HIST1H2BJ	ENST00000339812.2_1	chr6:27100149-27100529	-	21.0604	0.000233927
TAOK1-205	TAOK1	ENST00000583121.5_3	chr17:27717482-27802721	+	20.6481	0.0195912
GIMAP4-201	GIMAP4	ENST00000255945.3_1	chr7:150264365-150271043	+	20.5165	0.0183656
NCF1-201	NCF1	ENST00000289473.8_1	chr7:74188309-74203657	+	20.3182	0.0428071
CCND3-203	CCND3	ENST00000372991.8_1	chr6:41902671-41909586	-	19.8356	0.000229232
UTRN-202	UTRN	ENST00000367525.3_3	chr6:144980980-144999688	+	19.7451	0.00144186
UIMC1-207	UIMC1	ENST00000506128.5_2	chr5:176332051-176433582	-	19.7005	0.00262203
GIGYF1-201	GIGYF1	ENST00000275732.5_1	chr7:100277130-100287071	-	19.3619	0.00169645
FBL-205	FBL	ENST00000595545.5_2	chr19:40325098-40331081	-	19.3338	3.96815e-05
MOB3A-209	MOB3A	ENST00000592280.1_1	chr19:2073136-2078718	-	18.7295	0.00527571
CSF2RB-202	CSF2RB	ENST00000403662.7_3	chr22:37309670-37336491	+	18.6117	0.0481515
MFSD1-219	MFSD1	ENST00000622669.4_2	chr3:158519715-158547507	+	18.4994	0.00319754
MAX-204	MAX	ENST00000358402.8_1	chr14:65541842-65569222	-	18.1817	0.0473582
IFITM3-201	IFITM3	ENST00000399808.4_1	chr11:319669-321050	-	17.8388	0.0471933
CSRNP1-201	CSRNP1	ENST00000273153.9_1	chr3:39183346-39195066	-	17.4419	0.00326215
KDM6B-201	KDM6B	ENST00000254846.9_1	chr17:7743222-7758114	+	17.3947	0.0110839
PABPC1-219	PABPC1	ENST00000522387.5_1	chr8:101715389-101734220	-	17.142	0.00756363
CCDC9-201	CCDC9	ENST00000221922.10_2	chr19:47759716-47775210	+	16.9718	0.000656457
AHNAK-208	AHNAK	ENST00000533365.5_4	chr11:62259283-62313159	-	16.8276	0.00646669
TNFRSF1A-201	TNFRSF1A	ENST00000162749.6_1	chr12:6437923-6451280	-	16.6817	0.000679871
RANBP9-201	RANBP9	ENST00000011619.5_1	chr6:13621730-13711796	-	16.5924	0.00179693
FLII-216	FLII	ENST00000577398.6_1	chr17:18148150-18149376	-	16.2679	0.00861845
C9orf16-201	C9orf16	ENST00000372994.1_1	chr9:130922539-130926207	+	16.2595	0.000756551
FCER1G-201	FCER1G	ENST00000289902.1_1	chr1:161185087-161189038	+	16.1929	0.0413057
SNRPB-202	SNRPB	ENST00000438552.6_1	chr20:2442280-2451499	-	16.0974	0.00716326
CNN2-205	CNN2	ENST00000562958.6_1	chr19:1026628-1039067	+	15.7607	0.00178779
NDUFA10-208	NDUFA10	ENST00000444548.5_1	chr2:240908869-240951093	-	15.5736	0.00451501
PET100-202	PET100	ENST00000594797.5_1	chr19:7694623-7696842	+	15.5397	0.0215966
SECTM1-201	SECTM1	ENST00000269389.7_1	chr17:80278900-80291874	-	15.5363	0.0236031
PRKACB-204	PRKACB	ENST00000370685.7_1	chr1:84609954-84704181	+	15.4709	4.02255e-05
DENND2D-201	DENND2D	ENST00000357640.8_1	chr1:111729796-111743311	-	15.4414	0.000338213
PGD-201	PGD	ENST00000270776.12_1	chr1:10459137-10480201	+	15.0492	0.0244269
DEF6-201	DEF6	ENST00000316637.6_1	chr6:35265629-35289548	+	15.042	0.0186361
LYL1-201	LYL1	ENST00000264824.4_1	chr19:13209847-13213681	-	15.0174	0.0105614
CKAP4-201	CKAP4	ENST00000378026.4_3	chr12:106631655-106641766	-	14.9847	0.00156848
CXCR1-201	CXCR1	ENST00000295683.2_1	chr2:219027568-219031718	-	14.9698	0.0193754
ANKRD13D-216	ANKRD13D	ENST00000514166.5_1	chr11:67056873-67069956	+	14.9453	0.0159288
STAT6-217	STAT6	ENST00000555375.5_3	chr12:57493202-57496773	-	14.9416	0.0267549
PTPRC-206	PTPRC	ENST00000413409.6_1	chr1:198608227-198664300	+	14.9294	0.0171907
HMGB2-201	HMGB2	ENST00000296503.9_1	chr4:174252846-174256276	-	14.8408	0.00746386
RELT-202	RELT	ENST00000393580.2_1	chr11:73087713-73107685	+	14.7184	0.0001182
MAD1L1-208	MAD1L1	ENST00000437877.1_2	chr7:1937836-1980185	-	14.6746	0.0117031
KLF2-202	KLF2	ENST00000592003.1_1	chr19:16435651-16438071	+	14.6598	0.016271
BCL3-201	BCL3	ENST00000164227.9_1	chr19:45251804-45263301	+	14.5616	0.0386635
ABTB1-201	ABTB1	ENST00000232744.12_1	chr3:127391783-127399760	+	14.5605	0.00957591
EIF4H-202	EIF4H	ENST00000353999.6_1	chr7:73588686-73611426	+	14.5303	0.000607745
RAB10-201	RAB10	ENST00000264710.4_1	chr2:26256979-26360323	+	14.5204	0.00496158
S1PR4-201	S1PR4	ENST00000246115.4_1	chr19:3178766-3180330	+	14.5057	0.00953435
MAP3K5-201	MAP3K5	ENST00000359015.4_1	chr6:136878185-137113656	-	14.4419	0.00506523
S100A10-202	S100A10	ENST00000368811.7_1	chr1:151955391-151966866	-	14.4392	0.0213887
ARHGAP25-203	ARHGAP25	ENST00000409220.5_1	chr2:69001933-69053965	+	14.3921	0.0241475
SCLT1-201	SCLT1	ENST00000281142.9_3	chr4:129805148-130014762	-	14.3894	0.00879912
PSMB4-201	PSMB4	ENST00000290541.6_1	chr1:151372010-151374420	+	14.3474	0.0350661
STK17B-204	STK17B	ENST00000449152.1_1	chr2:197028088-197035724	-	14.3366	0.0459769
CNBP-207	CNBP	ENST00000502976.5_1	chr3:128888327-128902748	-	14.2618	0.00628955
FCMR-201	FCMR	ENST00000367091.7_1	chr1:207077731-207095343	-	14.2072	1.02976e-05
ARPC1B-201	ARPC1B	ENST00000252725.9_1	chr7:98972298-98992424	+	14.0159	0.00342651
MINDY1-203	MINDY1	ENST00000361936.9_1	chr1:150969311-150980841	-	14.0024	0.00187761
ZCCHC2-206	ZCCHC2	ENST00000588676.1_1	chr18:60190852-60192728	+	13.9811	0.0147036
FOSB-201	FOSB	ENST00000353609.7_1	chr19:45971253-45978436	+	13.897	0.0187782
CSF3R-203	CSF3R	ENST00000373103.5_1	chr1:36931644-36948879	-	13.5979	0.0211573
DGKZ-202	DGKZ	ENST00000343674.10_1	chr11:46354455-46402104	+	13.4563	0.0250039
SPAG7-201	SPAG7	ENST00000206020.7_1	chr17:4862523-4871167	-	13.4512	0.002165
RAB6A-202	RAB6A	ENST00000336083.7_1	chr11:73386941-73472136	-	13.3123	8.63738e-05
DENND3-211	DENND3	ENST00000519811.5_3	chr8:142138737-142205907	+	13.2337	0.0126186
IRF1-201	IRF1	ENST00000245414.8_1	chr5:131817301-131826490	-	13.0952	0.0251934
FOXO4-202	FOXO4	ENST00000374259.7_1	chrX:70316047-70323385	+	13.0611	0.0031719
ZNF467-201	ZNF467	ENST00000302017.3_1	chr7:149461452-149470568	-	13.053	0.00711584
CD2BP2-201	CD2BP2	ENST00000305596.7_1	chr16:30362087-30366682	-	12.9771	0.029865
IFI16-209	IFI16	ENST00000474473.1_1	chr1:158985463-158990319	+	12.873	0.00198444
TAPBP-234	TAPBP	ENST00000434618.6_1	chr6:33267471-33282164	-	12.8268	0.0371273
CERK-201	CERK	ENST00000216264.12_1	chr22:47080308-47134158	-	12.763	0.0129295
FBXW7-202	FBXW7	ENST00000281708.8_1	chr4:153242411-153457253	-	12.4798	0.000399619
PLXNC1-201	PLXNC1	ENST00000258526.8_1	chr12:94542499-94701451	+	12.4762	0.0280056
TPM2-203	TPM2	ENST00000378292.7_1	chr9:35681989-35691017	-	12.4743	0.0119014
DEDD2-204	DEDD2	ENST00000595337.5_1	chr19:42702765-42724275	-	12.4357	0.00024568
PCIF1-201	PCIF1	ENST00000372409.7_1	chr20:44563267-44576662	+	12.3921	0.0165933
RHBDF2-208	RHBDF2	ENST00000590288.1_3	chr17:74477528-74497453	-	12.3878	0.0292433
MYL9-202	MYL9	ENST00000346786.2_1	chr20:35169900-35178228	+	12.3608	0.0209215
LDB1-201	LDB1	ENST00000361198.9_1	chr10:103867317-103874703	-	12.3258	0.00145463
SP110-202	SP110	ENST00000258382.9_2	chr2:231041191-231084827	-	12.2931	0.0496623
RBCK1-202	RBCK1	ENST00000356286.9_1	chr20:388697-411610	+	12.2504	0.0010751
HELZ2-202	HELZ2	ENST00000427522.6_1	chr20:62189439-62199427	-	12.065	0.0032233
BCL2L1-203	BCL2L1	ENST00000376062.6_1	chr20:30252255-30310400	-	11.9435	0.030727
UBN1-209	UBN1	ENST00000592120.5_2	chr16:4896666-4909130	+	11.9426	0.0384836
EIF4G2-201	EIF4G2	ENST00000339995.9_2	chr11:10818601-10830657	-	11.8585	0.00191234
WDR1-204	WDR1	ENST00000499869.6_1	chr4:10075963-10118484	-	11.823	0.000145828
CCL5-203	CCL5	ENST00000605509.1_1	chr17:34199006-34207295	-	11.7246	0.00376537
ACAP1-201	ACAP1	ENST00000158762.7_1	chr17:7239848-7254797	+	11.7132	0.0414229
TCP11L2-207	TCP11L2	ENST00000551802.5_1	chr12:106696838-106712223	+	11.6581	0.00442468
SENP6-202	SENP6	ENST00000370010.6_1	chr6:76311225-76425620	+	11.6566	0.00396358
CAPZB-201	CAPZB	ENST00000264202.7_3	chr1:19666024-19811971	-	11.6016	0.0158672
FAM102A-203	FAM102A	ENST00000373095.5_1	chr9:130702858-130742792	-	11.5396	0.0124817
AC119396.1-201	AC119396.1	ENST00000576789.1_3	chr19:7413848-7448271	+	11.5365	0.0473128
TAF10-201	TAF10	ENST00000299424.8_1	chr11:6632073-6633898	-	11.5096	0.00391982
TRANK1-201	TRANK1	ENST00000429976.5_2	chr3:36868311-36986548	-	11.4725	0.0237596
PARVG-204	PARVG	ENST00000417767.1_3	chr22:44577278-44579299	+	11.4704	5.34398e-05
ITGA4-203	ITGA4	ENST00000397033.6_1	chr2:182321952-182400914	+	11.4573	0.0120358
MEX3C-203	MEX3C	ENST00000592416.1_1	chr18:48719280-48723129	-	11.3801	0.00235008
CD300A-202	CD300A	ENST00000360141.7_1	chr17:72462555-72480935	+	11.3369	0.00477423
FAM117A-201	FAM117A	ENST00000240364.6_1	chr17:47787694-47841529	-	11.3221	0.00745827
MEGF9-201	MEGF9	ENST00000373930.3_1	chr9:123363091-123476748	-	11.2941	0.0445138
STX11-201	STX11	ENST00000367568.4_1	chr6:144471663-144509507	+	11.2565	0.0237943
C19orf35-201	C19orf35	ENST00000342063.4_1	chr19:2274621-2282175	-	11.2524	0.0149549
CAPN1-201	CAPN1	ENST00000279247.10_1	chr11:64949343-64979476	+	11.2414	0.000339312
RPA2-203	RPA2	ENST00000373912.7_1	chr1:28218035-28241254	-	11.1785	0.000937617
HDAC7-207	HDAC7	ENST00000422254.5_3	chr12:48190890-48206834	-	11.1132	0.0424111
IFIT5-201	IFIT5	ENST00000371795.4_1	chr10:91174343-91180758	+	11.0886	0.0207474
CD55-204	CD55	ENST00000367064.7_1	chr1:207494853-207534311	+	11.0862	0.00907638
VAMP7-202	VAMP7	ENST00000286448.11_1	chrX:155110956-155173433	+	11.0353	0.0144266
MSRB1-206	MSRB1	ENST00000622125.4_3	chr16:1988235-1993294	-	10.9842	0.000417627
TMEM63A-201	TMEM63A	ENST00000366835.7_1	chr1:226033237-226070069	-	10.9706	0.0155576
AHSA2-202	AHSA2	ENST00000394457.7_2	chr2:61404664-61418338	+	10.9421	0.000605908
EDF1-201	EDF1	ENST00000224073.5_1	chr9:139756571-139760738	-	10.9325	0.0223796
SF1-203	SF1	ENST00000377387.5_1	chr11:64532078-64545941	-	10.8917	0.00184759
MATR3-201	MATR3	ENST00000394805.7_1	chr5:138629337-138667048	+	10.7881	0.00173431
IRF1-209	IRF1	ENST00000476613.1_1	chr5:131822654-131825337	-	10.7577	0.0094789
OST4-201	OST4	ENST00000429985.1_1	chr2:27293355-27294517	-	10.7482	0.0326227
PWWP2B-201	PWWP2B	ENST00000305233.5_1	chr10:134210672-134231367	+	10.6571	0.00126179
SBNO2-201	SBNO2	ENST00000361757.7_1	chr19:1107635-1174282	-	10.6532	0.0383655
FAM32A-205	FAM32A	ENST00000589852.5_1	chr19:16296191-16302425	+	10.6315	0.0367771
RELB-201	RELB	ENST00000221452.12_1	chr19:45504688-45541452	+	10.6208	0.00599802
RGS14-201	RGS14	ENST00000408923.7_1	chr5:176784838-176799602	+	10.6115	0.00127413
IL32-210	IL32	ENST00000525377.6_1	chr16:3115642-3132193	+	10.6023	0.000634127
FN3K-201	FN3K	ENST00000300784.7_1	chr17:80693451-80709073	+	10.5662	0.0128799
SPON2-222	SPON2	ENST00000617421.4_1	chr4:1160725-1202750	-	10.4764	0.0214708
TRIB1-201	TRIB1	ENST00000311922.3_1	chr8:126442563-126450647	+	10.4621	0.013
NPIPB5-017	NPIPB5	ENST00000543407.1	chr16:22516172-22538951	+	10.4125	0.0096132
ATF6B-209	ATF6B	ENST00000375201.8_1	chr6:32083041-32096030	-	10.3147	0.0203372
TMEM91-209	TMEM91	ENST00000539627.5_1	chr19:41856816-41889988	+	10.2871	0.00315514
APOBR-202	APOBR	ENST00000564831.5_1	chr16:28505970-28510291	+	10.2264	0.0431912
RGL2-237	RGL2	ENST00000425946.1_1	chr6:33264221-33266587	-	10.1595	0.0220167
FKBP5-202	FKBP5	ENST00000536438.5_1	chr6:35541362-35696360	-	10.1502	0.00213196
CALM3-209	CALM3	ENST00000597743.5_1	chr19:47104533-47112576	+	10.1411	0.000312989
DNAJC4-202	DNAJC4	ENST00000321685.7_1	chr11:63997750-64001753	+	10.1336	0.0112236
ATP5H-201	ATP5H	ENST00000301587.8_1	chr17:73034958-73043058	-	10.1143	0.0299417
DPYSL2-201	DPYSL2	ENST00000311151.9_3	chr8:26435359-26515694	+	10.0634	2.76173e-05
FBXL14-201	FBXL14	ENST00000339235.3_1	chr12:1675159-1703331	-	10.0509	0.00968321
KDM2A-202	KDM2A	ENST00000398645.6_1	chr11:66886740-67025136	+	9.98382	0.00528244
NBEAL2-205	NBEAL2	ENST00000450053.7_2	chr3:47021173-47051193	+	9.95694	0.0496397
UBA52-202	UBA52	ENST00000442744.6_1	chr19:18682670-18688360	+	9.90622	0.000121983
IL7R-201	IL7R	ENST00000303115.7_1	chr5:35856951-35879705	+	9.88714	0.0369838
TAP1-201	TAP1	ENST00000354258.4_1	chr6:32812986-32821755	-	9.83905	0.0268609
POLR1D-201	POLR1D	ENST00000302979.4_2	chr13:28195559-28197589	+	9.8096	0.0207557
SAFB-201	SAFB	ENST00000292123.9_1	chr19:5623110-5668489	+	9.80666	0.0127052
CDC42EP2-201	CDC42EP2	ENST00000279249.2_1	chr11:65082289-65089900	+	9.75736	0.0122099
ZNF316-201	ZNF316	ENST00000382252.5_1	chr7:6676953-6696063	+	9.74908	0.0036417
HK3-201	HK3	ENST00000292432.9_1	chr5:176307872-176326333	-	9.70441	0.0207353
IGBP1-201	IGBP1	ENST00000342206.10_1	chrX:69353299-69386174	+	9.64802	0.0169684
RABL6-201	RABL6	ENST00000311502.11_2	chr9:139702413-139735639	+	9.63563	0.00450105
C15orf39-205	C15orf39	ENST00000564848.1_1	chr15:75494546-75498470	+	9.59867	0.00846251
TFG-201	TFG	ENST00000240851.8_1	chr3:100428269-100467810	+	9.58831	0.00268334
SBF1-202	SBF1	ENST00000380817.7_1	chr22:50883429-50913453	-	9.57666	0.0109322
BTN2A1-203	BTN2A1	ENST00000429381.5_2	chr6:26458189-26469865	+	9.5243	0.0409796
LARS-202	LARS	ENST00000394434.6_1	chr5:145492601-145562223	-	9.51788	0.00215082
UTP3-201	UTP3	ENST00000254803.3_1	chr4:71554196-71556268	+	9.51336	0.0273448
EIF1B-201	EIF1B	ENST00000232905.3_1	chr3:40351175-40353915	+	9.48475	0.0405007
UBA3-202	UBA3	ENST00000361055.8_1	chr3:69103881-69129559	-	9.45082	0.0280719
YPEL5-205	YPEL5	ENST00000402708.5_1	chr2:30370382-30382417	+	9.43014	0.03751
ZNF805-201	ZNF805	ENST00000354309.4_1	chr19:57752053-57766503	+	9.41439	0.0120648
SH3BP5-202	SH3BP5	ENST00000383791.7_1	chr3:15296360-15374136	-	9.40508	0.00384775
SP1-203	SP1	ENST00000548560.1_1	chr12:53775086-53776442	+	9.38694	0.0267053
PELI1-201	PELI1	ENST00000358912.4_1	chr2:64319786-64371588	-	9.38151	0.042315
CAPN15-208	CAPN15	ENST00000637507.1_1	chr16:590105-598031	+	9.36391	0.000537709
TRAPPC6A-201	TRAPPC6A	ENST00000006275.8_1	chr19:45666186-45681495	-	9.31934	0.0405378
SDHB-201	SDHB	ENST00000375499.7_1	chr1:17345217-17380665	-	9.31849	0.0259202
DNAJB1-201	DNAJB1	ENST00000254322.2_1	chr19:14625582-14629232	-	9.29872	0.0173601
NUBP2-206	NUBP2	ENST00000565134.5_1	chr16:1833008-1838614	+	9.25668	0.0415426
MSL1-202	MSL1	ENST00000398532.8_3	chr17:38278551-38293169	+	9.23788	0.0275293
USP4-203	USP4	ENST00000415188.1_1	chr3:49354165-49377469	-	9.23671	0.0406714
SMAP2-201	SMAP2	ENST00000372708.5_1	chr1:40840320-40888998	+	9.23574	0.0113105
R3HDM2-204	R3HDM2	ENST00000402412.5_1	chr12:57647548-57824788	-	9.20169	0.0210656
ADAM17-201	ADAM17	ENST00000310823.7_1	chr2:9628615-9695917	-	9.19872	0.00118113
RAB11FIP1-202	RAB11FIP1	ENST00000330843.8_1	chr8:37716467-37756972	-	9.1879	0.0218503
ZBTB12-201	ZBTB12	ENST00000375527.2_1	chr6:31867384-31869769	-	9.148	2.19179e-08
LILRA5-201	LILRA5	ENST00000432233.7_1	chr19:54818353-54824409	-	9.13248	5.61384e-05
HVCN1-202	HVCN1	ENST00000356742.9_1	chr12:111086602-111126514	-	9.08183	0.0384328
AC008964.1-201	AC008964.1	ENST00000593965.1	chr5:39105358-39107350	+	9.04664	0.0293198
NPC2-207	NPC2	ENST00000555619.5_1	chr14:74946636-74960215	-	9.04122	0.00122171
MED13L-206	MED13L	ENST00000549786.1_2	chr12:116419687-116421240	-	9.03465	0.0137084
STRAP-202	STRAP	ENST00000419869.6_1	chr12:16035329-16056412	+	9.00611	0.00250505
IDI1-201	IDI1	ENST00000381344.7_1	chr10:1085848-1095110	-	8.99041	0.0143413
CD22-234	CD22	ENST00000613136.1_1	chr19:35826956-35827564	+	8.9707	0.0336721
TUBB4B-201	TUBB4B	ENST00000340384.4_1	chr9:140135665-140138159	+	8.94568	0.0100034
PRKAG2-201	PRKAG2	ENST00000287878.8_2	chr7:151253197-151574210	-	8.91625	0.0229159
HIST1H2BD-201	HIST1H2BD	ENST00000289316.2_1	chr6:26158374-26171577	+	8.89712	0.0342048
PTPRC-209	PTPRC	ENST00000442510.6_2	chr1:198608170-198726412	+	8.89291	0.00821145
KXD1-217	KXD1	ENST00000602094.5_2	chr19:18669922-18680188	+	8.877	0.00218422
LSM14A-203	LSM14A	ENST00000544216.7_1	chr19:34663471-34720420	+	8.86293	1.58079e-05
DENND4B-201	DENND4B	ENST00000361217.8_1	chr1:153901977-153919172	-	8.82657	0.018244
MBOAT7-213	MBOAT7	ENST00000495279.2_1	chr19:54683380-54687517	-	8.78967	0.0383174
EEF1D-232	EEF1D	ENST00000530445.5_1	chr8:144662790-144669734	-	8.77581	0.0053196
SNX17-210	SNX17	ENST00000537606.5_1	chr2:27593363-27600400	+	8.77352	0.0218423
ABT1-201	ABT1	ENST00000274849.2_1	chr6:26597180-26600972	+	8.74518	0.00826558
CD93-201	CD93	ENST00000246006.4_1	chr20:23059986-23066977	-	8.69434	0.0394356
LSM6-201	LSM6	ENST00000296581.10_2	chr4:147096837-147112687	+	8.64858	9.27921e-05
YY1AP1-210	YY1AP1	ENST00000368339.9_2	chr1:155629234-155658447	-	8.64287	0.00830452
MTA2-201	MTA2	ENST00000278823.6_1	chr11:62360686-62369312	-	8.60333	0.0224413
MMGT1-201	MMGT1	ENST00000305963.2_1	chrX:135044229-135056222	-	8.60256	0.00868629
ZNF141-201	ZNF141	ENST00000240499.7_1	chr4:331624-369047	+	8.59796	0.00192684
P2RY8-201	P2RY8	ENST00000381297.9_1	chrX:1581465-1656000	-	8.59059	0.0358589
BRD4-201	BRD4	ENST00000263377.6_1	chr19:15346330-15391262	-	8.56578	0.0184561
UBE2D3-209	UBE2D3	ENST00000394804.6_1	chr4:103715543-103749105	-	8.54343	0.0136928
RAD21-201	RAD21	ENST00000297338.6_1	chr8:117858174-117887105	-	8.52136	0.0195599
SERPINB9-201	SERPINB9	ENST00000380698.4_1	chr6:2887500-2903514	-	8.5177	0.0258888
NXT1-201	NXT1	ENST00000254998.2_1	chr20:23331373-23335414	+	8.50318	0.0441342
SART1-201	SART1	ENST00000312397.9_1	chr11:65729160-65747299	+	8.42634	0.00919759
NOSIP-204	NOSIP	ENST00000596358.5_1	chr19:50058968-50083829	-	8.38383	0.0345281
MFSD1-201	MFSD1	ENST00000264266.12_2	chr3:158519880-158546905	+	8.37349	0.00276327
RBM3-202	RBM3	ENST00000376755.1_1	chrX:48433340-48436256	+	8.36587	0.000988316
APOBEC3A-202	APOBEC3A	ENST00000402255.5_1	chr22:39348756-39359188	+	8.3554	0.00768001
SIGLEC9-202	SIGLEC9	ENST00000440804.7_1	chr19:51628165-51639908	+	8.34477	0.0379108
FBXL19-201	FBXL19	ENST00000338343.8_2	chr16:30935418-30960104	+	8.32052	0.00523186
NBPF14-007	NBPF14	ENST00000458135.1	chr1:148005466-148025863	-	8.31964	0.0045586
SMARCC1-201	SMARCC1	ENST00000254480.9_1	chr3:47626762-47823407	-	8.31199	0.00522575
SPOPL-201	SPOPL	ENST00000280098.8_1	chr2:139259371-139331117	+	8.31108	0.0181185
TRAPPC12-201	TRAPPC12	ENST00000324266.9_1	chr2:3383457-3483337	+	8.26354	0.00162834
CD300E-201	CD300E	ENST00000392619.1_3	chr17:72606026-72619877	-	8.25408	0.0436733
SMPD2-201	SMPD2	ENST00000258052.7_1	chr6:109761966-109765122	+	8.23501	0.00647334
CSGALNACT2-201	CSGALNACT2	ENST00000374466.3_1	chr10:43633934-43680756	+	8.22877	0.0282718
C17orf107-202	C17orf107	ENST00000521575.1_1	chr17:4802713-4804094	+	8.18533	0.00262079
YBX3-201	YBX3	ENST00000228251.8_1	chr12:10851812-10875911	-	8.18332	0.0230777
LMAN2-201	LMAN2	ENST00000303127.11_1	chr5:176758563-176778853	-	8.17404	0.0185884
VMP1-201	VMP1	ENST00000262291.8_1	chr17:57784826-57918453	+	8.15615	0.0102119
ZNF865-201	ZNF865	ENST00000568956.1_1	chr19:56116771-56128635	+	8.15281	0.000704905
PLP2-202	PLP2	ENST00000376327.5_1	chrX:49028273-49031588	+	8.14939	0.00984823
CSNK1A1-201	CSNK1A1	ENST00000261798.9_1	chr5:148871760-148930960	-	8.14284	0.00072507
ZNF335-201	ZNF335	ENST00000322927.2_1	chr20:44577292-44600811	-	8.12098	0.0188835
FBRSL1-205	FBRSL1	ENST00000542061.2_2	chr12:133083616-133088538	+	8.12058	0.0107091
SOCS3-201	SOCS3	ENST00000330871.3_1	chr17:76352859-76356158	-	8.11517	0.0390757
NBPF14-003	NBPF14	ENST00000444640.1	chr1:148005466-148025863	-	8.09129	0.0134495
TBCB-201	TBCB	ENST00000221855.7_1	chr19:36605888-36616847	+	8.05288	0.00455898
KDM5A-201	KDM5A	ENST00000399788.6_1	chr12:389295-498620	-	8.04721	0.00913053
ITPKB-203	ITPKB	ENST00000429204.5_1	chr1:226819391-226926876	-	8.03953	0.020733
SOCS1-201	SOCS1	ENST00000332029.2_1	chr16:11348262-11350036	-	8.01378	0.0155989
CDKN2D-202	CDKN2D	ENST00000393599.2_1	chr19:10677138-10679654	-	8.00474	0.0078164
MBNL1-209	MBNL1	ENST00000460591.5_1	chr3:151987238-152163263	+	7.99769	0.0170071
OSM-201	OSM	ENST00000215781.2_2	chr22:30658818-30662829	-	7.99238	0.00675692
ADCY7-202	ADCY7	ENST00000394697.6_1	chr16:50300427-50352046	+	7.98601	0.0337759
CHMP1A-201	CHMP1A	ENST00000397901.7_1	chr16:89710839-89724253	-	7.96914	0.00170362
SCARF1-201	SCARF1	ENST00000263071.8_1	chr17:1537152-1549041	-	7.96034	0.00684188
IFI16-201	IFI16	ENST00000295809.11_1	chr1:158979717-159024945	+	7.93009	0.0315051
GLS-201	GLS	ENST00000320717.7_2	chr2:191745553-191830278	+	7.9183	0.0210108
DMWD-208	DMWD	ENST00000602829.1_1	chr19:46288514-46289168	-	7.89519	0.0301343
SLC38A1-201	SLC38A1	ENST00000398637.9_1	chr12:46576846-46662795	-	7.89302	0.00991514
DUS1L-202	DUS1L	ENST00000354321.11_1	chr17:80015748-80023421	-	7.884	0.000219462
IL6R-202	IL6R	ENST00000368485.7_1	chr1:154377669-154441926	+	7.8836	0.0368568
HMOX1-201	HMOX1	ENST00000216117.8_1	chr22:35776828-35790207	+	7.87379	0.00199416
APOBEC3G-201	APOBEC3G	ENST00000407997.3_1	chr22:39473010-39483748	+	7.87264	0.00167167
ATG2A-201	ATG2A	ENST00000377264.7_2	chr11:64662018-64684720	-	7.86537	0.0403793
RRBP1-205	RRBP1	ENST00000398782.2_3	chr20:17640251-17662940	-	7.86089	0.0355357
TAF1-204	TAF1	ENST00000423759.5_1	chrX:70586089-70685854	+	7.85827	0.0151284
BAK1-203	BAK1	ENST00000442998.6_1	chr6:33540324-33548070	-	7.84495	0.0159034
GSR-201	GSR	ENST00000221130.9_2	chr8:30535578-30585443	-	7.82959	0.0121366
HNRNPLL-209	HNRNPLL	ENST00000449105.7_2	chr2:38789120-38830108	-	7.80042	0.00380444
NLRP6-203	NLRP6	ENST00000534750.5_1	chr11:278365-285359	+	7.79703	3.81245e-05
GALNS-213	GALNS	ENST00000569433.1_1	chr16:88922161-88923339	-	7.79492	0.00729352
NONO-201	NONO	ENST00000276079.12_1	chrX:70503433-70521018	+	7.79465	0.0197354
PPP1R15A-202	PPP1R15A	ENST00000600406.1_2	chr19:49377575-49379299	+	7.78864	0.00345012
C15orf39-202	C15orf39	ENST00000394987.4_1	chr15:75494218-75504510	+	7.76439	0.0304957
LIMD1-202	LIMD1	ENST00000440097.5_1	chr3:45635816-45715390	+	7.7515	0.000377732
SPTBN1-201	SPTBN1	ENST00000333896.5_1	chr2:54785531-54889445	+	7.7514	0.00233637
VEGFB-201	VEGFB	ENST00000309422.6_2	chr11:64002010-64006265	+	7.74088	0.0193711
MED16-204	MED16	ENST00000395808.7_1	chr19:867630-893218	-	7.72981	0.00410173
EPS15-203	EPS15	ENST00000371733.7_1	chr1:51819935-51985000	-	7.72957	0.00966912
CXXC5-201	CXXC5	ENST00000302517.7_1	chr5:139027877-139063467	+	7.72291	0.0076049
LGALSL-201	LGALSL	ENST00000238875.9_1	chr2:64681226-64688515	+	7.71338	0.00353675
LNPEP-201	LNPEP	ENST00000231368.9_1	chr5:96271168-96373219	+	7.70887	0.0122845
VPS28-204	VPS28	ENST00000526054.5_1	chr8:145649000-145652366	-	7.6955	0.0142749
ZNRF2-201	ZNRF2	ENST00000323037.4_1	chr7:30323923-30407308	+	7.67778	0.0142168
LIX1L-201	LIX1L	ENST00000604000.3_1	chr1:145477085-145501670	+	7.65277	0.0202849
RANBP1-203	RANBP1	ENST00000411892.5_3	chr22:20105080-20113011	+	7.63869	0.0225367
ZNF282-204	ZNF282	ENST00000610704.4_1	chr7:148892577-148923339	+	7.61502	0.00175144
AGTPBP1-201	AGTPBP1	ENST00000337006.8_1	chr9:88161455-88356944	-	7.60776	0.0257921
SNX20-201	SNX20	ENST00000300590.7_1	chr16:50700211-50715264	-	7.58379	0.0126303
UBR2-202	UBR2	ENST00000372901.1_1	chr6:42531800-42661242	+	7.5734	0.0124413
STRADB-201	STRADB	ENST00000194530.7_1	chr2:202316392-202345569	+	7.53758	0.00610828
CCR7-201	CCR7	ENST00000246657.2_1	chr17:38710021-38721724	-	7.49435	0.0322201
ZNF385A-205	ZNF385A	ENST00000546970.5_1	chr12:54762937-54779552	-	7.48968	0.0243653
CIC-204	CIC	ENST00000572681.6_2	chr19:42772689-42799948	+	7.47189	0.0229595
ALKBH5-201	ALKBH5	ENST00000399138.4_1	chr17:18087553-18113268	+	7.46503	0.0208494
YWHAQ-202	YWHAQ	ENST00000381844.8_1	chr2:9724101-9770745	-	7.4557	0.0284209
ERP29-201	ERP29	ENST00000261735.3_1	chr12:112451120-112461255	+	7.44769	0.0182398
MAN1A1-201	MAN1A1	ENST00000368468.3_1	chr6:119498374-119670926	-	7.42477	0.0387757
AKAP10-201	AKAP10	ENST00000225737.10_1	chr17:19807615-19881150	-	7.41652	0.0224189
ECH1-201	ECH1	ENST00000221418.8_1	chr19:39306062-39322645	-	7.40281	0.0068124
SEPT9-246	SEPT9	ENST00000592951.5_1	chr17:75450075-75495122	+	7.39146	0.0456743
INTS1-201	INTS1	ENST00000404767.7_1	chr7:1509913-1544003	-	7.38122	0.029087
UPF1-201	UPF1	ENST00000262803.9_1	chr19:18942747-18979045	+	7.37614	0.00117831
NFKBIZ-202	NFKBIZ	ENST00000326172.9_1	chr3:101568358-101579866	+	7.36639	0.00773224
TPM4-215	TPM4	ENST00000592138.5_3	chr19:16192533-16204391	+	7.35953	0.00192765
DAP-201	DAP	ENST00000230895.10_3	chr5:10679342-10761384	-	7.31552	0.0353189
MTA1-207	MTA1	ENST00000435036.6_1	chr14:105886157-105937064	+	7.30479	0.0413308
TREML2-201	TREML2	ENST00000483722.1_1	chr6:41158015-41168932	-	7.29288	0.0200563
VNN2-201	VNN2	ENST00000326499.10_1	chr6:133065009-133079147	-	7.28104	0.00399646
NFE2-202	NFE2	ENST00000435572.6_1	chr12:54685895-54694905	-	7.27846	0.0470332
CALCOCO1-210	CALCOCO1	ENST00000548263.5_1	chr12:54104943-54121212	-	7.24229	0.0309448
TRIM38-201	TRIM38	ENST00000357085.4_2	chr6:25963030-25991454	+	7.23387	0.0485681
STX10-208	STX10	ENST00000591197.1_1	chr19:13256117-13261197	-	7.21935	0.0397899
DCAF10-202	DCAF10	ENST00000377724.7_1	chr9:37800499-37863322	+	7.21894	0.0279969
ALYREF-202	ALYREF	ENST00000505490.2_1	chr17:79845720-79849462	-	7.21397	0.0134319
APLP2-202	APLP2	ENST00000278756.7_1	chr11:129940463-130014699	+	7.20687	0.0120266
CCDC97-201	CCDC97	ENST00000269967.3_1	chr19:41816094-41830788	+	7.20597	0.0253039
NCOR2-204	NCOR2	ENST00000405201.5_1	chr12:124808961-124979798	-	7.18415	0.0249286
FUT8-203	FUT8	ENST00000360689.9_1	chr14:65877310-66210839	+	7.16484	0.00138954
SMAD3-201	SMAD3	ENST00000327367.8_1	chr15:67358183-67487533	+	7.16105	0.00721615
ACTN1-209	ACTN1	ENST00000553659.1_1	chr14:69392276-69444986	-	7.14328	0.000498173
GTF2I-212	GTF2I	ENST00000573035.5_1	chr7:74072011-74175022	+	7.13679	0.0297878
WAC-202	WAC	ENST00000347934.8_2	chr10:28822242-28909472	+	7.13616	0.0212579
NUP153-202	NUP153	ENST00000537253.5_2	chr6:17615266-17707065	-	7.12193	0.00941171
CWC15-201	CWC15	ENST00000279839.7_1	chr11:94695787-94706776	-	7.11328	0.00628905
PPM1K-205	PPM1K	ENST00000509340.1_1	chr4:89199719-89205413	-	7.11066	0.0368587
EMD-202	EMD	ENST00000369842.8_1	chrX:153607557-153609883	+	7.1082	0.00138064
RAB4A-201	RAB4A	ENST00000366690.4_1	chr1:229406879-229441641	+	7.08353	0.000539449
TGFBR2-201	TGFBR2	ENST00000295754.9_1	chr3:30647994-30735626	+	7.08201	0.0199109
PTK2B-203	PTK2B	ENST00000397501.5_1	chr8:27168999-27316907	+	7.06348	0.00642115
IPCEF1-201	IPCEF1	ENST00000265198.8_1	chr6:154475744-154677900	-	7.04983	0.0259368
RNF145-212	RNF145	ENST00000611185.4_2	chr5:158584421-158636606	-	7.03754	0.0259932
NTNG2-202	NTNG2	ENST00000393229.3_1	chr9:135037334-135119921	+	7.01469	0.0394251
WRNIP1-204	WRNIP1	ENST00000380773.8_2	chr6:2765648-2785979	+	6.99273	0.000308598
CAPS-203	CAPS	ENST00000588776.6_3	chr19:5911718-5915888	+	6.96111	0.0371238
IMPDH1-201	IMPDH1	ENST00000338791.10_1	chr7:128032331-128050306	-	6.95616	0.0278876
EPS15L1-202	EPS15L1	ENST00000455140.6_2	chr19:16466050-16582823	-	6.94649	0.0112855
ECHS1-201	ECHS1	ENST00000368547.3_1	chr10:135175984-135187193	-	6.93699	0.0265906
GRAP-201	GRAP	ENST00000284154.9_1	chr17:18923986-18950950	-	6.92106	0.0170068
TMEM55A-201	TMEM55A	ENST00000285419.7_2	chr8:92006024-92053292	-	6.91964	0.0110278
SLC1A5-203	SLC1A5	ENST00000542575.6_2	chr19:47278140-47291851	-	6.91321	0.00566113
ZZEF1-201	ZZEF1	ENST00000381638.6_1	chr17:3907739-4046314	-	6.89938	0.0150379
TMEM131L-203	TMEM131L	ENST00000409959.7_1	chr4:154387501-154557863	+	6.86088	0.0187193
TIMP2-201	TIMP2	ENST00000262768.11_1	chr17:76849059-76921469	-	6.85931	0.0126683
P4HB-201	P4HB	ENST00000331483.8_1	chr17:79801035-79818570	-	6.84306	0.000269416
LIMK2-201	LIMK2	ENST00000331728.8_2	chr22:31608281-31676066	+	6.84292	0.00968854
RBM10-203	RBM10	ENST00000377604.7_1	chrX:47004268-47046210	+	6.82425	0.0314188
NBPF14-005	NBPF14	ENST00000436356.1	chr1:148005466-148025863	-	6.81406	0.0453584
LIMK2-203	LIMK2	ENST00000340552.4_1	chr22:31644473-31673624	+	6.80116	0.0224725
DHX16-202	DHX16	ENST00000376442.7_1	chr6:30620896-30640814	-	6.77752	0.00898954
GSTP1-202	GSTP1	ENST00000398606.7_1	chr11:67351066-67354131	+	6.77376	0.0491991
ZNF770-201	ZNF770	ENST00000356321.4_1	chr15:35270542-35280488	-	6.77154	0.00259526
ABI3-201	ABI3	ENST00000225941.5_2	chr17:47287589-47300587	+	6.75506	0.0290262
SULF2-201	SULF2	ENST00000359930.8_1	chr20:46285656-46415330	-	6.73831	0.0108166
GUCD1-213	GUCD1	ENST00000621833.4_1	chr22:24936391-24951903	-	6.72017	0.00235062
SMARCD2-203	SMARCD2	ENST00000448276.6_1	chr17:61909444-61920300	-	6.71115	0.000562958
IRF2BP2-201	IRF2BP2	ENST00000366609.3_1	chr1:234740015-234745271	-	6.69233	0.0177254
VPS9D1-202	VPS9D1	ENST00000561976.5_1	chr16:89773542-89785777	-	6.68792	0.015128
C14orf93-201	C14orf93	ENST00000299088.10_1	chr14:23455117-23479360	-	6.68574	0.0327653
RAB35-201	RAB35	ENST00000229340.9_1	chr12:120532899-120554643	-	6.68132	0.0263035
SRF-201	SRF	ENST00000265354.5_1	chr6:43139037-43149245	+	6.67883	0.00738943
HEXDC-202	HEXDC	ENST00000337014.10_2	chr17:80376194-80400521	+	6.65298	0.0154017
BBS9-201	BBS9	ENST00000242067.10_1	chr7:33169144-33645680	+	6.64618	1.14136e-05
TC2N-203	TC2N	ENST00000435962.6_1	chr14:92246095-92333873	-	6.63011	0.0162947
MAN2A1-201	MAN2A1	ENST00000261483.4_1	chr5:109025067-109202879	+	6.6219	0.0317989
SELENOO-201	SELENOO	ENST00000380903.6_1	chr22:50639408-50656045	+	6.59763	0.00150308
SPG7-201	SPG7	ENST00000268704.6_1	chr16:89574811-89624174	+	6.58278	0.00121005
ZC3H3-201	ZC3H3	ENST00000262577.5_1	chr8:144519825-144623623	-	6.57486	0.0193966
GTF2F1-201	GTF2F1	ENST00000394456.9_1	chr19:6379580-6393471	-	6.57459	0.0139255
RNPEP-201	RNPEP	ENST00000295640.8_1	chr1:201951752-201975275	+	6.56564	0.0231462
CD6-201	CD6	ENST00000313421.11_1	chr11:60739152-60787849	+	6.55625	0.0217716
ATXN7L3B-201	ATXN7L3B	ENST00000519948.3_1	chr12:74931607-74939210	+	6.53758	0.0203927
AGAP2-201	AGAP2	ENST00000257897.7_3	chr12:58117544-58135940	-	6.52771	0.0185981
FXR2-201	FXR2	ENST00000250113.11_1	chr17:7494548-7518185	-	6.52644	1.30367e-05
TOPORS-201	TOPORS	ENST00000360538.6_1	chr9:32540542-32552551	-	6.4948	0.0374047
CD48-203	CD48	ENST00000613788.1_2	chr1:160650212-160681621	-	6.48466	0.000219499
C1orf216-201	C1orf216	ENST00000270815.4_1	chr1:36179476-36185073	-	6.4821	0.00065518
ANKS1A-201	ANKS1A	ENST00000360359.4_1	chr6:34857042-35059190	+	6.47585	0.0432467
DGKQ-201	DGKQ	ENST00000273814.7_1	chr4:952675-967344	-	6.47107	0.00144413
HERC3-202	HERC3	ENST00000402738.5_1	chr4:89513574-89629693	+	6.46999	0.0330655
SEPT6-205	SEPT6	ENST00000394610.5_1	chrX:118750911-118827333	-	6.46949	0.0143516
DOCK5-201	DOCK5	ENST00000276440.11_1	chr8:25042380-25273232	+	6.46688	0.044783
SIGLEC5-201	SIGLEC5	ENST00000534261.3_1	chr19:52115180-52148798	-	6.44235	0.0317738
NXF1-211	NXF1	ENST00000531709.6_1	chr11:62559595-62572942	-	6.43073	0.0334241
B4GALT1-201	B4GALT1	ENST00000379731.4_1	chr9:33110635-33167354	-	6.41404	0.0302276
HSH2D-208	HSH2D	ENST00000616645.4_1	chr19:16244838-16269381	+	6.3809	0.0144782
VPS35-201	VPS35	ENST00000299138.11_1	chr16:46690044-46723104	-	6.36673	0.0142489
PIK3CG-201	PIK3CG	ENST00000359195.3_1	chr7:106505924-106547590	+	6.35377	0.0124995
RNASEH2C-201	RNASEH2C	ENST00000308418.8_1	chr11:65485144-65488418	-	6.33833	0.0140611
SLC25A43-201	SLC25A43	ENST00000217909.7_1	chrX:118533023-118588441	+	6.32999	0.00155703
SP110-201	SP110	ENST00000258381.10_2	chr2:231033634-231084665	-	6.3279	0.0260517
LY6G6F-201	LY6G6F	ENST00000375832.4_1	chr6:31674662-31678372	+	6.31775	0.0355774
NFE2-203	NFE2	ENST00000540264.2_1	chr12:54685957-54689542	-	6.30537	0.0197034
APLNR-202	APLNR	ENST00000606794.1_1	chr11:57001067-57004675	-	6.29526	0.0047864
CS-212	CS	ENST00000548567.5_1	chr12:56665485-56694175	-	6.28908	0.00630214
IGIP-201	IGIP	ENST00000333305.4_1	chr5:139505520-139508977	+	6.28109	0.000442308
GMFG-207	GMFG	ENST00000598034.5_2	chr19:39818999-39826646	-	6.28013	0.0463943
CDC34-201	CDC34	ENST00000215574.8_1	chr19:531712-542092	+	6.27782	0.00466288
TNKS-213	TNKS	ENST00000522110.1_1	chr8:9413442-9416341	+	6.27625	0.00460095
GORASP1-201	GORASP1	ENST00000319283.7_1	chr3:39138150-39149854	-	6.27009	0.00538559
ANKRD13C-202	ANKRD13C	ENST00000370944.8_1	chr1:70726271-70820405	-	6.25792	0.00217486
HSPE1-201	HSPE1	ENST00000233893.9_1	chr2:198364718-198368181	+	6.25717	0.0480041
GPAT4-201	GPAT4	ENST00000396987.7_1	chr8:41435719-41482520	+	6.24534	0.00330996
SYNCRIP-202	SYNCRIP	ENST00000369622.7_1	chr6:86323824-86353003	-	6.23351	0.0087385
GIT1-201	GIT1	ENST00000225394.7_1	chr17:27900487-27916645	-	6.20992	0.018415
MBTD1-204	MBTD1	ENST00000586178.5_1	chr17:49254786-49337427	-	6.20944	0.00621089
PRPS1-204	PRPS1	ENST00000372435.8_1	chrX:106871737-106894256	+	6.20888	0.00321753
JDP2-203	JDP2	ENST00000435893.6_1	chr14:75895060-75940814	+	6.20244	0.00086798
FZR1-203	FZR1	ENST00000441788.6_1	chr19:3506271-3538328	+	6.19367	0.0135162
ARHGAP45-206	ARHGAP45	ENST00000586866.5_2	chr19:1067497-1086627	+	6.17829	0.00382035
NDUFB3-201	NDUFB3	ENST00000237889.8_1	chr2:201936462-201950473	+	6.17267	0.0186771
MYADM-202	MYADM	ENST00000391768.2_1	chr19:54372693-54377873	+	6.16787	0.0135242
SETD5-203	SETD5	ENST00000402198.5_1	chr3:9439403-9519838	+	6.1643	0.00431693
GNG2-212	GNG2	ENST00000556752.2_1	chr14:52344310-52436518	+	6.16109	0.0393642
CCDC7-215	CCDC7	ENST00000639629.1_2	chr10:32740571-33165321	+	6.15604	0.00897793
IPMK-201	IPMK	ENST00000373935.3_1	chr10:59951278-60027694	-	6.1552	0.00336514
FAR1-201	FAR1	ENST00000354817.7_1	chr11:13690217-13753893	+	6.15114	0.00160744
MVB12A-201	MVB12A	ENST00000317040.11_1	chr19:17529890-17536148	+	6.14542	0.00749025
AC022532.1-201	AC022532.1	ENST00000420338.2	chr10:72194585-72196314	+	6.1362	0.0122973
CPOX-201	CPOX	ENST00000264193.2_1	chr3:98298286-98312567	-	6.13437	0.00361571
CACTIN-203	CACTIN	ENST00000429344.6_1	chr19:3610639-3626813	-	6.13206	0.0181873
MEST-201	MEST	ENST00000223215.8_1	chr7:130131934-130146133	+	6.12938	0.00375889
CROCC-201	CROCC	ENST00000375541.9_1	chr1:17248445-17299474	+	6.11937	0.0230949
YPEL3-202	YPEL3	ENST00000398841.5_1	chr16:30103635-30107521	-	6.11813	0.0220066
WDR11-201	WDR11	ENST00000263461.10_1	chr10:122610687-122669036	+	6.11717	0.00246992
AKT1S1-205	AKT1S1	ENST00000391833.5_1	chr19:50372295-50378542	-	6.10416	0.00650427
NUP62-202	NUP62	ENST00000422090.2_1	chr19:50410082-50433001	-	6.10128	0.0015518
FASN-201	FASN	ENST00000306749.3_1	chr17:80036209-80056208	-	6.08589	0.00388228
RALY-201	RALY	ENST00000246194.7_1	chr20:32581528-32668077	+	6.07981	0.0386464
TGS1-201	TGS1	ENST00000260129.5_1	chr8:56685701-56738005	+	6.07714	0.00410922
N4BP1-201	N4BP1	ENST00000262384.3_1	chr16:48572637-48644120	-	6.07287	0.00731328
SLC43A2-201	SLC43A2	ENST00000301335.9_1	chr17:1472561-1532130	-	6.05785	0.00998486
MZT1-201	MZT1	ENST00000377818.3_1	chr13:73282495-73301825	-	6.05124	0.0466793
ELOA-201	ELOA	ENST00000418390.6_1	chr1:24069645-24088549	+	6.0484	0.00199753
UBE2Q2-201	UBE2Q2	ENST00000267938.8_1	chr15:76135626-76193419	+	6.02443	0.00113158
ZFP36L1-204	ZFP36L1	ENST00000555997.1_1	chr14:69254377-69257960	-	5.98245	0.0137341
DGAT2-201	DGAT2	ENST00000228027.11_3	chr11:75479777-75512579	+	5.97213	0.0184811
CDK9-201	CDK9	ENST00000373264.4_1	chr9:130548328-130553066	+	5.96906	0.0278834
EIF4ENIF1-206	EIF4ENIF1	ENST00000397525.5_2	chr22:31835353-31885573	-	5.91057	0.0101009
SLC35E2B-205	SLC35E2B	ENST00000617444.4_1	chr1:1592939-1624083	-	5.90588	0.0122034
HDAC4-215	HDAC4	ENST00000543185.5_1	chr2:239969865-240322643	-	5.8887	0.000556259
PLEKHF2-201	PLEKHF2	ENST00000315367.3_1	chr8:96146032-96168912	+	5.88718	0.034028
COPB1-201	COPB1	ENST00000249923.7_1	chr11:14479052-14521398	-	5.88165	0.0156589
HP1BP3-203	HP1BP3	ENST00000375003.6_1	chr1:21069175-21101498	-	5.8726	0.00581093
ARHGAP10-201	ARHGAP10	ENST00000336498.7_1	chr4:148653214-148993931	+	5.85298	0.0192525
TCF4-278	TCF4	ENST00000636400.2_1	chr18:52889565-53257009	-	5.84908	9.84669e-06
MBOAT7-201	MBOAT7	ENST00000245615.5_1	chr19:54677109-54693666	-	5.8438	0.00100735
STK4-202	STK4	ENST00000372806.7_1	chr20:43595115-43708600	+	5.84372	0.0174343
YME1L1-209	YME1L1	ENST00000613434.4_1	chr10:27399041-27443349	-	5.83987	0.0236012
KCNE3-201	KCNE3	ENST00000310128.8_2	chr11:74165886-74178673	-	5.83293	0.0449303
LBR-202	LBR	ENST00000338179.6_1	chr1:225589205-225616557	-	5.83083	0.0162632
KCNA3-201	KCNA3	ENST00000369769.3_1	chr1:111215087-111217655	-	5.82391	0.0206055
PRKAG1-206	PRKAG1	ENST00000548065.5_1	chr12:49396064-49412980	-	5.80238	0.0329561
DPYD-202	DPYD	ENST00000370192.7_1	chr1:97543299-98386579	-	5.77892	0.0251988
HADHA-201	HADHA	ENST00000380649.7_1	chr2:26413504-26467594	-	5.7756	0.0421945
CUEDC2-201	CUEDC2	ENST00000369937.4_1	chr10:104183002-104192418	-	5.76923	0.0244047
SEPT9-202	SEPT9	ENST00000423034.6_1	chr17:75369272-75496676	+	5.76448	0.016484
ANKRD12-203	ANKRD12	ENST00000400020.7_1	chr18:9137561-9283757	+	5.7625	0.00280117
TAF15-215	TAF15	ENST00000605844.5_1	chr17:34136459-34174246	+	5.76071	0.0453135
PPP2CA-203	PPP2CA	ENST00000481195.5_1	chr5:133530025-133561833	-	5.74096	0.0229301
EML4-201	EML4	ENST00000318522.9_1	chr2:42396490-42559688	+	5.72283	0.00235794
DHX15-201	DHX15	ENST00000336812.4_1	chr4:24529098-24586173	-	5.71731	0.0210184
HPS6-201	HPS6	ENST00000299238.6_1	chr10:103825147-103827795	+	5.71628	0.00387867
ELF4-201	ELF4	ENST00000308167.9_1	chrX:129198903-129244470	-	5.71592	0.0473877
YTHDF1-202	YTHDF1	ENST00000370339.7_1	chr20:61826781-61847586	-	5.70924	0.00866958
IFNAR2-205	IFNAR2	ENST00000404220.7_1	chr21:34602276-34637980	+	5.70774	0.0449256
SPAG9-201	SPAG9	ENST00000262013.11_1	chr17:49039535-49198226	-	5.70708	0.040237
SP140-203	SP140	ENST00000392045.7_1	chr2:231090446-231177927	+	5.70407	0.01439
CAMTA2-202	CAMTA2	ENST00000361571.9_1	chr17:4871292-4890665	-	5.70332	0.00357702
BLK-201	BLK	ENST00000259089.8_1	chr8:11351510-11422113	+	5.69998	0.0105589
SPG11-201	SPG11	ENST00000261866.11_1	chr15:44854894-44955862	-	5.69203	0.0266766
PPM1A-202	PPM1A	ENST00000325658.3_1	chr14:60716159-60755273	+	5.68545	0.0102466
SOCS4-202	SOCS4	ENST00000395472.2_1	chr14:55493948-55516206	+	5.68266	0.000869862
PSMA7-201	PSMA7	ENST00000370858.3_1	chr20:60714387-60718486	-	5.68107	0.00426614
RNF41-201	RNF41	ENST00000345093.8_1	chr12:56595959-56615705	-	5.67329	0.00308839
PI4KA-201	PI4KA	ENST00000255882.10_2	chr22:21061979-21213100	-	5.67107	0.0317781
RBM19-203	RBM19	ENST00000545145.6_1	chr12:114254547-114404111	-	5.66063	0.0320401
PQLC1-203	PQLC1	ENST00000397778.6_1	chr18:77662420-77711664	-	5.63531	0.0151072
FAM46A-202	FAM46A	ENST00000369754.7_3	chr6:82455447-82462425	-	5.63143	0.0321195
CCDC47-201	CCDC47	ENST00000225726.9_1	chr17:61822610-61851135	-	5.61694	0.00137791
ZNF185-209	ZNF185	ENST00000449285.6_1	chrX:152082986-152142024	+	5.61001	0.0440499
RHOQ-201	RHOQ	ENST00000238738.8_1	chr2:46769867-46810260	+	5.6017	0.011998
ZCCHC6-201	ZCCHC6	ENST00000277141.10_2	chr9:88902648-88969325	-	5.5983	0.0483401
HDAC3-201	HDAC3	ENST00000305264.7_1	chr5:141000443-141016437	-	5.59706	0.0480447
IDH3G-202	IDH3G	ENST00000370092.7_1	chrX:153051221-153059967	-	5.59599	0.0231281
MGEA5-203	MGEA5	ENST00000370094.7_1	chr10:103556803-103578175	-	5.5931	0.0445992
GLTP-201	GLTP	ENST00000318348.8_1	chr12:110288748-110318293	-	5.59132	0.00267733
PPM1B-204	PPM1B	ENST00000378551.6_1	chr2:44396016-44461785	+	5.57892	0.0293915
NDUFA11-205	NDUFA11	ENST00000592634.5_1	chr19:5894686-5903782	-	5.5779	0.021916
UBL3-201	UBL3	ENST00000380680.4_1	chr13:30338508-30424821	-	5.5772	0.0362438
KIAA0141-202	KIAA0141	ENST00000432126.6_1	chr5:141303373-141321612	+	5.57316	2.76476e-06
ECHDC1-222	ECHDC1	ENST00000531967.5_1	chr6:127609857-127664020	-	5.55964	0.00765629
TXNDC11-202	TXNDC11	ENST00000356957.7_1	chr16:11772939-11836694	-	5.55906	0.0112328
TXNIP-201	TXNIP	ENST00000425134.2_2	chr1:145439306-145441230	+	5.54699	0.0383211
RNF168-201	RNF168	ENST00000318037.3_1	chr3:196195654-196230639	-	5.54493	0.0143305
SPPL2B-209	SPPL2B	ENST00000613503.4_1	chr19:2328629-2354804	+	5.53271	0.0178225
AGO4-201	AGO4	ENST00000373210.3_1	chr1:36273773-36323491	+	5.51564	0.0104684
CPNE3-203	CPNE3	ENST00000517490.5_1	chr8:87526656-87573726	+	5.49938	0.0485568
RERE-201	RERE	ENST00000337907.7_3	chr1:8412457-8877524	-	5.49089	0.0114997
FES-201	FES	ENST00000328850.7_1	chr15:91427642-91439006	+	5.48946	0.0229657
KARS-202	KARS	ENST00000319410.9_1	chr16:75661372-75681563	-	5.47796	0.00455428
WWP2-202	WWP2	ENST00000359154.6_1	chr16:69796209-69975644	+	5.47739	0.0136286
PDCD4-202	PDCD4	ENST00000393104.6_1	chr10:112631553-112659763	+	5.47281	0.0397638
YIPF2-201	YIPF2	ENST00000253031.6_1	chr19:11032861-11039357	-	5.46661	0.0242463
CPNE5-201	CPNE5	ENST00000244751.6_1	chr6:36708555-36807778	-	5.4582	0.0425352
NAPB-207	NAPB	ENST00000617876.4_3	chr20:23355156-23402156	-	5.43364	0.0426472
NOM1-201	NOM1	ENST00000275820.3_1	chr7:156742417-156765876	+	5.41953	0.000551066
DCAF5-201	DCAF5	ENST00000341516.9_1	chr14:69517598-69619843	-	5.41812	0.0461439
ATM-201	ATM	ENST00000278616.8_1	chr11:108093559-108239826	+	5.39715	0.0247487
ATP6V1H-201	ATP6V1H	ENST00000355221.7_4	chr8:54628117-54756118	-	5.39217	0.00454155
RABAC1-201	RABAC1	ENST00000222008.10_1	chr19:42460833-42463542	-	5.38832	0.0328958
MLLT1-201	MLLT1	ENST00000252674.8_2	chr19:6210390-6279959	-	5.38671	0.00367604
KAT2A-201	KAT2A	ENST00000225916.9_1	chr17:40265126-40273376	-	5.37155	0.0134856
ZNF512B-201	ZNF512B	ENST00000369888.5_1	chr20:62588055-62601218	-	5.34898	0.0222528
USP20-201	USP20	ENST00000315480.8_1	chr9:132597749-132644107	+	5.34555	0.00404405
SPATA5L1-201	SPATA5L1	ENST00000305560.10_1	chr15:45694529-45713617	+	5.34134	0.0203147
TINF2-202	TINF2	ENST00000399423.8_1	chr14:24708849-24711869	-	5.32282	0.029444
ATP8B2-202	ATP8B2	ENST00000368489.3_1	chr1:154300276-154323783	+	5.31103	0.0315865
GGCT-202	GGCT	ENST00000275428.8_1	chr7:30536237-30544460	-	5.30051	0.00645983
SERPINA1-208	SERPINA1	ENST00000448921.5_1	chr14:94843084-94857029	-	5.29748	0.00453487
TMEM2-202	TMEM2	ENST00000377044.8_3	chr9:74298282-74383800	-	5.29569	0.0240727
PRPF6-201	PRPF6	ENST00000266079.4_1	chr20:62612488-62664453	+	5.29464	0.0384412
NDFIP1-201	NDFIP1	ENST00000253814.5_1	chr5:141488070-141534008	+	5.29383	0.0161565
ZBTB7B-203	ZBTB7B	ENST00000417934.6_1	chr1:154975106-154990998	+	5.29272	0.00524965
UBTF-201	UBTF	ENST00000302904.8_1	chr17:42282401-42298994	-	5.27972	0.0485191
FAM160B1-202	FAM160B1	ENST00000369248.8_1	chr10:116581503-116624476	+	5.27185	0.00286639
FEM1B-201	FEM1B	ENST00000306917.4_1	chr15:68570141-68588203	+	5.26766	0.012957
ATP11A-212	ATP11A	ENST00000487903.5_1	chr13:113344643-113541482	+	5.26653	0.0189304
YIPF4-201	YIPF4	ENST00000238831.8_1	chr2:32502979-32541663	+	5.26267	0.000169442
VPS13D-214	VPS13D	ENST00000620676.4_1	chr1:12290124-12572099	+	5.26248	0.0236274
PGS1-201	PGS1	ENST00000262764.10_1	chr17:76374721-76420635	+	5.25185	0.00393678
HNRNPC-205	HNRNPC	ENST00000553300.5_1	chr14:21679096-21737601	-	5.24909	0.00122271
ZNF783-202	ZNF783	ENST00000434415.5_1	chr7:148959262-148982082	+	5.24878	0.0100421
HACD4-202	HACD4	ENST00000495827.2_1	chr9:20999514-21031635	-	5.22987	0.00253283
SLCO3A1-201	SLCO3A1	ENST00000318445.10_1	chr15:92396925-92709133	+	5.22986	0.0439491
PDIA4-201	PDIA4	ENST00000286091.8_1	chr7:148700154-148725733	-	5.22391	0.0413498
PNP-201	PNP	ENST00000361505.9_1	chr14:20937538-20945253	+	5.2213	0.00654103
PLCG2-207	PLCG2	ENST00000564138.5_1	chr16:81812863-81996298	+	5.22103	0.00966193
AEBP1-201	AEBP1	ENST00000223357.7_1	chr7:44143960-44154159	+	5.21875	0.00270933
RDH11-201	RDH11	ENST00000381346.8_1	chr14:68143518-68162531	-	5.21819	0.00869985
MDC1-201	MDC1	ENST00000376406.7_1	chr6:30667584-30685666	-	5.19389	0.0294688
CCDC142-202	CCDC142	ENST00000393965.7_1	chr2:74700917-74710361	-	5.19325	0.0378991
STK26-202	STK26	ENST00000394334.6_1	chrX:131157293-131209971	+	5.18833	0.00103692
RNF103-201	RNF103	ENST00000237455.4_1	chr2:86830516-86850978	-	5.1845	1.49018e-05
PATZ1-202	PATZ1	ENST00000266269.9_3	chr22:31721790-31742218	-	5.18056	0.0239978
ABHD13-201	ABHD13	ENST00000375898.3_1	chr13:108870727-108886603	+	5.17461	0.0044205
DRAP1-201	DRAP1	ENST00000312515.6_1	chr11:65686728-65689032	+	5.1618	0.00840431
EPAS1-201	EPAS1	ENST00000263734.4_1	chr2:46524541-46613842	+	5.15573	0.0103217
DCAF16-201	DCAF16	ENST00000382247.5_1	chr4:17802278-17812381	-	5.12572	0.0245659
ARMC8-210	ARMC8	ENST00000469044.5_1	chr3:137906126-138017231	+	5.11628	1.29473e-05
FBXO46-201	FBXO46	ENST00000317683.3_1	chr19:46213887-46234162	-	5.10981	0.0268151
MAD1L1-204	MAD1L1	ENST00000406869.5_1	chr7:1855430-2272878	-	5.08	0.0482586
GAK-201	GAK	ENST00000314167.8_1	chr4:843066-926086	-	5.07661	0.0210398
LYPLA2-205	LYPLA2	ENST00000374514.7_1	chr1:24117460-24122029	+	5.07118	0.043331
EZH1-202	EZH1	ENST00000428826.6_1	chr17:40852293-40897048	-	5.06045	0.0276923
CHST7-201	CHST7	ENST00000276055.3_1	chrX:46433219-46457843	+	5.05922	0.0432193
ZNF513-201	ZNF513	ENST00000323703.10_1	chr2:27600098-27603592	-	5.0548	0.00142883
COQ8A-203	COQ8A	ENST00000366779.5_1	chr1:227085237-227175246	+	5.04297	0.0262851
TRIM21-201	TRIM21	ENST00000254436.7_1	chr11:4406132-4414926	-	5.0359	0.0376047
STX17-201	STX17	ENST00000259400.10_2	chr9:102668915-102732623	+	5.03413	0.0455122
UBE2M-201	UBE2M	ENST00000253023.7_1	chr19:59067079-59070327	-	5.03409	0.00746995
PLCB3-204	PLCB3	ENST00000540288.5_1	chr11:64019019-64036622	+	5.03222	0.0235275
CFAP161-202	CFAP161	ENST00000560091.5_3	chr15:81299374-81430408	+	5.03081	0.0126574
WASHC2C-201	WASHC2C	ENST00000336378.8_1	chr10:46222684-46288409	+	5.02099	0.0297974
TM9SF3-201	TM9SF3	ENST00000371142.8_1	chr10:98277866-98346809	-	5.01749	0.0105614
ATP6V1D-201	ATP6V1D	ENST00000216442.11_1	chr14:67804788-67826966	-	5.01486	0.0126391
SEC31A-205	SEC31A	ENST00000395310.6_1	chr4:83739814-83812419	-	5.01338	0.0196108
LETM1-201	LETM1	ENST00000302787.2_1	chr4:1813206-1857974	-	5.00699	0.0107911
CHFR-201	CHFR	ENST00000266880.11_1	chr12:133408943-133464184	-	5.0032	0.0333138
TNKS2-201	TNKS2	ENST00000371627.4_1	chr10:93558069-93625033	+	5.00179	0.0144641
EXTL3-201	EXTL3	ENST00000220562.8_1	chr8:28558844-28611204	+	4.99563	0.0102381
WDR81-202	WDR81	ENST00000409644.5_2	chr17:1628254-1641886	+	4.99447	0.0468581
TMEM127-201	TMEM127	ENST00000258439.7_1	chr2:96914254-96931732	-	4.99075	0.0220407
TMEM229B-201	TMEM229B	ENST00000357461.6_1	chr14:67936983-67982021	-	4.98806	0.00255621
CALHM2-201	CALHM2	ENST00000260743.9_1	chr10:105206546-105212075	-	4.97562	0.0283159
HNRNPR-210	HNRNPR	ENST00000478691.5_1	chr1:23631181-23670829	-	4.97032	0.0212725
CDC42EP3-201	CDC42EP3	ENST00000295324.3_1	chr2:37869032-37899334	-	4.96941	0.00385911
PWWP2A-201	PWWP2A	ENST00000307063.8_1	chr5:159518346-159546430	-	4.95521	0.0272026
ENTPD4-202	ENTPD4	ENST00000358689.8_2	chr8:23286665-23315208	-	4.95485	0.0193566
MALT1-202	MALT1	ENST00000348428.7_2	chr18:56338618-56421709	+	4.94938	0.00698282
DDX46-202	DDX46	ENST00000452510.6_2	chr5:134094471-134166828	+	4.92952	0.0228066
ZNF100-202	ZNF100	ENST00000358296.10_3	chr19:21905568-21950430	-	4.92126	0.00194579
MRPL51-201	MRPL51	ENST00000229238.4_1	chr12:6601052-6602764	-	4.9192	0.00887246
PARD6B-201	PARD6B	ENST00000371610.6_1	chr20:49348081-49370278	+	4.91781	0.0437338
ASAP2-201	ASAP2	ENST00000281419.7_1	chr2:9346894-9545807	+	4.91672	0.00879625
PGAM5-203	PGAM5	ENST00000498926.6_1	chr12:133287405-133299320	+	4.91101	0.000349232
CTDP1-208	CTDP1	ENST00000613122.4_1	chr18:77439801-77516623	+	4.90791	0.00464635
PPP6R3-203	PPP6R3	ENST00000393800.6_2	chr11:68228199-68382802	+	4.9056	0.00154374
PAK2-201	PAK2	ENST00000327134.7_1	chr3:196466728-196559518	+	4.89912	0.02323
EHMT1-203	EHMT1	ENST00000460843.5_2	chr9:140513415-140730579	+	4.88915	0.0228614
SLC37A1-201	SLC37A1	ENST00000352133.2_1	chr21:43934024-44001550	+	4.88132	0.00126077
PVALB-201	PVALB	ENST00000216200.9_2	chr22:37196728-37215523	-	4.87658	0.0090464
ARHGEF40-201	ARHGEF40	ENST00000298694.8_1	chr14:21538429-21558399	+	4.87009	0.0134468
C15orf39-206	C15orf39	ENST00000565074.1_1	chr15:75498785-75501936	+	4.86451	0.0424408
RAB33B-201	RAB33B	ENST00000305626.5_1	chr4:140374961-140397763	+	4.86382	0.00260414
PABPC1-218	PABPC1	ENST00000521865.5_1	chr8:101730315-101734977	-	4.86045	0.0187952
COG8-206	COG8	ENST00000306875.8_2	chr16:69360816-69373570	-	4.86026	0.00726249
KHNYN-201	KHNYN	ENST00000251343.9_1	chr14:24898492-24911040	+	4.85015	0.0186662
TOMM20-201	TOMM20	ENST00000366607.4_1	chr1:235272651-235292251	-	4.84724	0.0479881
GAA-201	GAA	ENST00000302262.7_1	chr17:78075503-78093678	+	4.84719	0.0391546
GBP5-202	GBP5	ENST00000443807.1_1	chr1:89728381-89738487	-	4.83889	0.0144516
STK38L-201	STK38L	ENST00000389032.7_1	chr12:27397108-27478892	+	4.83285	0.0449661
VPS28-210	VPS28	ENST00000529182.5_1	chr8:145649000-145652366	-	4.82959	0.039783
CX3CR1-205	CX3CR1	ENST00000541347.5_1	chr3:39304986-39322764	-	4.82868	0.0258285
CCDC174-202	CCDC174	ENST00000383794.6_1	chr3:14693271-14714166	+	4.81957	0.00619944
PAFAH1B2-204	PAFAH1B2	ENST00000527958.5_1	chr11:117014983-117041764	+	4.804	0.0129399
ING5-213	ING5	ENST00000636051.1_2	chr2:242626500-242661220	+	4.78415	0.00628606
LRG1-201	LRG1	ENST00000306390.6_1	chr19:4536421-4540486	-	4.77638	0.025828
PLEKHM1-201	PLEKHM1	ENST00000430334.7_1	chr17:43513266-43568110	-	4.7739	0.0141832
PITPNM2-201	PITPNM2	ENST00000280562.9_1	chr12:123468027-123595042	-	4.77031	0.0119342
TBC1D12-201	TBC1D12	ENST00000225235.4_1	chr10:96162261-96295687	+	4.76417	0.0139303
NCBP2-AS2-201	NCBP2-AS2	ENST00000602845.1_1	chr3:196669494-196670411	+	4.75774	0.000798885
TMEM268-202	TMEM268	ENST00000374049.4_2	chr9:117373486-117408702	+	4.74905	0.00378321
PPFIA1-201	PPFIA1	ENST00000253925.11_1	chr11:70116806-70230506	+	4.74777	0.0409535
AKT2-206	AKT2	ENST00000392038.6_1	chr19:40736224-40791302	-	4.74269	0.0155126
LMF2-201	LMF2	ENST00000216080.5_3	chr22:50941380-50946113	-	4.74241	0.00992868
SRP72-201	SRP72	ENST00000342756.9_1	chr4:57333081-57369273	+	4.73564	0.0429094
TMEM129-202	TMEM129	ENST00000382936.7_1	chr4:1717680-1723058	-	4.72834	0.0118278
IMMT-204	IMMT	ENST00000410111.7_1	chr2:86371055-86422893	-	4.72777	0.0243193
IL13RA1-202	IL13RA1	ENST00000371666.7_1	chrX:117861535-117928502	+	4.72355	0.0377989
TSEN54-201	TSEN54	ENST00000333213.10_1	chr17:73512606-73520820	+	4.72252	0.00732017
PARP12-201	PARP12	ENST00000263549.7_1	chr7:139723544-139763521	-	4.72203	0.00772949
PRKX-201	PRKX	ENST00000262848.5_1	chrX:3522411-3631649	-	4.72159	0.0181815
WDR44-201	WDR44	ENST00000254029.7_2	chrX:117480072-117583924	+	4.71604	0.0262262
INPP5A-203	INPP5A	ENST00000368594.7_1	chr10:134351324-134596984	+	4.69296	0.00642664
ITFG1-201	ITFG1	ENST00000320640.10_1	chr16:47188298-47495185	-	4.69279	0.0353651
NCOA5-201	NCOA5	ENST00000290231.10_1	chr20:44689624-44718591	-	4.69082	0.0322447
LMTK2-201	LMTK2	ENST00000297293.5_1	chr7:97736197-97838945	+	4.66799	0.00999846
POLD1-214	POLD1	ENST00000613923.4_2	chr19:50887580-50921275	+	4.66541	0.0341599
P2RX7-202	P2RX7	ENST00000328963.9_1	chr12:121570631-121625835	+	4.66073	0.0355461
SEPT1-201	SEPT1	ENST00000321367.7_1	chr16:30389454-30394171	-	4.66036	6.49811e-06
MSL2-201	MSL2	ENST00000309993.2_1	chr3:135867764-135914688	-	4.65977	0.00794307
ATP6V0B-213	ATP6V0B	ENST00000532642.5_1	chr1:44440616-44443885	+	4.6582	0.0255215
ERN1-201	ERN1	ENST00000433197.3_1	chr17:62116502-62207485	-	4.65256	0.00172046
SOS1-203	SOS1	ENST00000426016.5_1	chr2:39208537-39348192	-	4.65163	0.00565499
SMPD4-202	SMPD4	ENST00000409031.5_3	chr2:130908982-130940323	-	4.64763	0.010876
SFPQ-201	SFPQ	ENST00000357214.5_1	chr1:35648533-35658749	-	4.64487	0.02013
SLX4-201	SLX4	ENST00000294008.3_1	chr16:3631182-3661599	-	4.64483	0.0496434
UNC50-204	UNC50	ENST00000409975.5_2	chr2:99225042-99234978	+	4.64203	0.0191648
NCLN-201	NCLN	ENST00000246117.8_1	chr19:3185598-3209568	+	4.62965	0.00910679
CARHSP1-202	CARHSP1	ENST00000396593.6_2	chr16:8946799-8962258	-	4.62344	0.0240152
RAB12-201	RAB12	ENST00000329286.6_1	chr18:8609443-8639379	+	4.6115	0.0285592
ZNF680-201	ZNF680	ENST00000309683.10_1	chr7:63980262-64023484	-	4.60698	0.0337764
LZIC-202	LZIC	ENST00000377223.5_1	chr1:9988997-10003387	-	4.60524	0.0337634
TMCO3-202	TMCO3	ENST00000434316.6_1	chr13:114145310-114204510	+	4.6023	0.0370218
C17orf113-201	C17orf113	ENST00000587304.2_2	chr17:40190250-40202632	-	4.59421	0.0395332
HOMER2-201	HOMER2	ENST00000304231.12_1	chr15:83517735-83621480	-	4.58317	0.0367498
ARHGEF11-202	ARHGEF11	ENST00000368194.7_1	chr1:156904632-157015162	-	4.57903	0.0217425
ZNF486-201	ZNF486	ENST00000335117.8_1	chr19:20278083-20311299	+	4.56023	0.0287595
ABCA7-201	ABCA7	ENST00000263094.10_1	chr19:1040102-1065568	+	4.55988	0.0497394
PLCG1-202	PLCG1	ENST00000373271.5_1	chr20:39765877-39806266	+	4.55798	0.0490257
ARRDC3-201	ARRDC3	ENST00000265138.3_1	chr5:90664541-90679176	-	4.55796	0.0393633
SLC30A5-202	SLC30A5	ENST00000396591.7_1	chr5:68389473-68426896	+	4.55761	0.0204413
TBC1D25-201	TBC1D25	ENST00000376771.8_1	chrX:48397845-48420997	+	4.55674	0.0133099
QSOX2-201	QSOX2	ENST00000358701.9_2	chr9:139098179-139137687	-	4.53678	0.0328775
ZNF277-201	ZNF277	ENST00000361822.7_1	chr7:111846643-111983151	+	4.533	0.00552966
DNMT3A-201	DNMT3A	ENST00000264709.7_2	chr2:25450724-25565459	-	4.5255	0.0329534
CHD8-201	CHD8	ENST00000399982.6_1	chr14:21853354-21899867	-	4.52247	0.0157741
PYGO2-202	PYGO2	ENST00000368457.2_1	chr1:154929502-154934224	-	4.51509	0.0291042
SETX-201	SETX	ENST00000224140.5_1	chr9:135136743-135230372	-	4.50799	0.042004
PIAS4-201	PIAS4	ENST00000262971.2_1	chr19:4007644-4039384	+	4.50742	0.0143958
ELK4-202	ELK4	ENST00000357992.8_1	chr1:205577071-205601090	-	4.50359	0.0210396
RASSF3-204	RASSF3	ENST00000542104.5_2	chr12:65004293-65091347	+	4.50087	0.0179542
CEBPG-201	CEBPG	ENST00000284000.8_1	chr19:33864236-33873592	+	4.50008	0.00508092
FNBP1-202	FNBP1	ENST00000420781.5_1	chr9:132649466-132805473	-	4.49761	0.035211
COA7-201	COA7	ENST00000371538.4_1	chr1:53150123-53164038	-	4.49558	0.0208943
C16orf62-201	C16orf62	ENST00000251143.9_1	chr16:19566737-19712485	+	4.48616	0.0422019
PKIG-201	PKIG	ENST00000349959.3_1	chr20:43242949-43247678	+	4.48549	0.00460843
COPB2-201	COPB2	ENST00000333188.9_1	chr3:139076248-139108574	-	4.48535	0.000270525
DGAT1-206	DGAT1	ENST00000528718.5_1	chr8:145538247-145550573	-	4.4775	0.000223591
COASY-201	COASY	ENST00000393818.2_2	chr17:40714185-40718293	+	4.47568	0.0435292
MYBBP1A-201	MYBBP1A	ENST00000254718.8_1	chr17:4442197-4458926	-	4.47495	0.0110286
SLC7A5-201	SLC7A5	ENST00000261622.4_1	chr16:87863629-87903094	-	4.47278	0.00951306
LATS1-207	LATS1	ENST00000543571.5_1	chr6:149979289-150039392	-	4.46784	0.00560962
TMEM154-201	TMEM154	ENST00000304385.7_1	chr4:153539784-153601317	-	4.46575	0.0307059
SLAMF6-203	SLAMF6	ENST00000368059.7_1	chr1:160454820-160493052	-	4.46306	0.0143217
MRPL53-201	MRPL53	ENST00000258105.7_1	chr2:74699085-74700449	-	4.46003	0.0409473
MAPK8IP3-201	MAPK8IP3	ENST00000250894.8_2	chr16:1756184-1820318	+	4.45512	0.0338125
AC099489.1-203	AC099489.1	ENST00000598234.5_2	chr16:11465872-11617444	-	4.45508	0.0117658
SIRT1-201	SIRT1	ENST00000212015.10_1	chr10:69644427-69678147	+	4.45188	0.0111807
DYNC1LI2-201	DYNC1LI2	ENST00000258198.6_1	chr16:66754796-66785701	-	4.44731	0.0324935
SNRPD1-201	SNRPD1	ENST00000300413.9_2	chr18:19192228-19213485	+	4.44502	0.0161761
WDR61-201	WDR61	ENST00000267973.6_3	chr15:78575577-78592136	-	4.4426	0.0187921
OARD1-210	OARD1	ENST00000479950.5_1	chr6:41032517-41040330	-	4.44118	0.0251905
ABAT-202	ABAT	ENST00000396600.6_1	chr16:8806826-8878432	+	4.43925	0.00252606
HNRNPC-203	HNRNPC	ENST00000430246.6_1	chr14:21678715-21733675	-	4.4322	0.000491273
FCF1-201	FCF1	ENST00000341162.8_1	chr14:75179847-75205323	+	4.42979	0.000686335
CRAMP1-202	CRAMP1	ENST00000397412.7_1	chr16:1662326-1727909	+	4.42686	0.00608607
PLXND1-201	PLXND1	ENST00000324093.8_1	chr3:129274018-129325661	-	4.42192	0.0055595
SETDB1-201	SETDB1	ENST00000271640.9_1	chr1:150898815-150937211	+	4.42061	0.0343101
RAB11FIP3-201	RAB11FIP3	ENST00000262305.8_3	chr16:475619-573011	+	4.41708	0.0141675
RPUSD2-203	RPUSD2	ENST00000616318.1_1	chr15:40861636-40862266	+	4.41446	0.0428957
BCR-201	BCR	ENST00000305877.12_2	chr22:23522397-23660224	+	4.41191	0.0425183
KLHL18-201	KLHL18	ENST00000232766.5_1	chr3:47324436-47388306	+	4.40384	0.0129238
JCAD-201	JCAD	ENST00000375377.1_1	chr10:30301729-30348453	-	4.39936	0.00992504
CD2AP-201	CD2AP	ENST00000359314.5_1	chr6:47445525-47594999	+	4.39127	0.0378416
NME2-202	NME2	ENST00000393190.4_1	chr17:49243925-49249105	+	4.39105	0.0235777
TRAM1-205	TRAM1	ENST00000521425.5_2	chr8:71485677-71520013	-	4.38882	0.0340403
MON1B-201	MON1B	ENST00000248248.7_1	chr16:77224816-77236302	+	4.38454	0.0021697
CPSF1-212	CPSF1	ENST00000616140.1_1	chr8:145618446-145634733	-	4.38423	0.014308
RCOR3-202	RCOR3	ENST00000367006.8_1	chr1:211432621-211487933	+	4.38171	0.00101709
KAT8-206	KAT8	ENST00000543774.6_1	chr16:31127075-31142714	+	4.37286	0.0324249
PACS2-203	PACS2	ENST00000447393.5_1	chr14:105781081-105864484	+	4.37225	0.000571802
PUM1-204	PUM1	ENST00000373747.7_1	chr1:31404353-31538551	-	4.36528	0.0415094
APOL2-201	APOL2	ENST00000249066.10_1	chr22:36622256-36636000	-	4.36285	0.0116388
TNPO2-202	TNPO2	ENST00000425528.5_4	chr19:12810008-12834810	-	4.36109	0.0125379
ORAI1-202	ORAI1	ENST00000617316.1_2	chr12:122064455-122080583	+	4.35464	0.0157031
HNRNPC-208	HNRNPC	ENST00000553753.5_1	chr14:21678741-21737562	-	4.35303	0.0222275
C5orf51-201	C5orf51	ENST00000381647.6_2	chr5:41904451-41921738	+	4.35135	0.0378584
DYNC1H1-201	DYNC1H1	ENST00000360184.8_1	chr14:102430865-102517128	+	4.35129	0.034994
UBE2D1-201	UBE2D1	ENST00000373910.8_1	chr10:60094735-60130513	+	4.34735	0.0157735
NUFIP2-201	NUFIP2	ENST00000225388.8_1	chr17:27582854-27621136	-	4.34475	0.0246464
ARFRP1-208	ARFRP1	ENST00000612256.4_1	chr20:62329995-62339010	-	4.34228	0.000188093
GAS7-201	GAS7	ENST00000323816.8_1	chr17:9813926-10017870	-	4.33968	0.0219719
ATM-215	ATM	ENST00000530958.5_1	chr11:108093830-108107261	+	4.33933	0.00520694
ZNF740-201	ZNF740	ENST00000416904.4_1	chr12:53574484-53588925	+	4.32121	0.0144777
TRIO-202	TRIO	ENST00000344204.8_1	chr5:14143811-14510313	+	4.31885	0.00368414
SGPL1-202	SGPL1	ENST00000373202.7_1	chr10:72575726-72640930	+	4.31862	0.0384837
TAGLN-207	TAGLN	ENST00000532870.5_1	chr11:117072589-117075494	+	4.31341	7.31286e-05
NAE1-203	NAE1	ENST00000379463.6_1	chr16:66836783-66864879	-	4.31311	0.0442657
SYNGR2-201	SYNGR2	ENST00000225777.7_1	chr17:76164639-76169608	+	4.31249	0.0255715
ACAP2-201	ACAP2	ENST00000326793.10_2	chr3:194995465-195163807	-	4.31182	0.0375205
CYTH2-204	CYTH2	ENST00000452733.6_1	chr19:48972289-48985571	+	4.299	0.00948746
SORT1-201	SORT1	ENST00000256637.7_3	chr1:109852192-109940573	-	4.29889	0.0180729
LRFN1-201	LRFN1	ENST00000248668.4_1	chr19:39797208-39805976	-	4.29886	0.0053293
STX7-202	STX7	ENST00000367941.6_1	chr6:132767006-132834201	-	4.29792	0.00187619
C17orf67-201	C17orf67	ENST00000397861.6_1	chr17:54869274-54911257	-	4.29633	0.0281656
SEL1L-201	SEL1L	ENST00000336735.8_1	chr14:81937893-82000205	-	4.28921	0.0115833
IFFO1-205	IFFO1	ENST00000436152.6_1	chr12:6647541-6661066	-	4.27753	0.0478062
KRI1-201	KRI1	ENST00000312962.10_1	chr19:10663754-10676713	-	4.26664	0.0169514
KCTD12-201	KCTD12	ENST00000377474.3_1	chr13:77454301-77460525	-	4.26403	0.0277101
ARID3B-201	ARID3B	ENST00000346246.9_1	chr15:74833518-74890472	+	4.25394	0.00259762
FFAR2-201	FFAR2	ENST00000246549.2_1	chr19:35940617-35942667	+	4.24868	0.0292378
ZADH2-201	ZADH2	ENST00000322342.3_1	chr18:72907063-72921303	-	4.2477	0.00484734
TWF2-201	TWF2	ENST00000305533.9_1	chr3:52262626-52273276	-	4.24105	0.0243685
NACC2-201	NACC2	ENST00000277554.3_1	chr9:138898383-138987131	-	4.23289	0.00323116
ATP8A1-202	ATP8A1	ENST00000381668.9_2	chr4:42410390-42659122	-	4.23232	0.0350624
ABHD5-205	ABHD5	ENST00000458276.6_1	chr3:43732362-43760541	+	4.21653	0.00871232
UPF2-201	UPF2	ENST00000356352.6_1	chr10:11962021-12077896	-	4.21407	0.0137142
MAST4-201	MAST4	ENST00000261569.11_1	chr5:66300448-66462879	+	4.21262	8.92191e-05
RECQL5-201	RECQL5	ENST00000317905.9_1	chr17:73622934-73663269	-	4.21154	0.00912068
MYO18A-202	MYO18A	ENST00000527372.6_2	chr17:27398142-27507430	-	4.20812	0.014473
FBXO41-205	FBXO41	ENST00000521871.5_1	chr2:73481818-73511559	-	4.20414	0.0468773
BLOC1S3-202	BLOC1S3	ENST00000587722.1_1	chr19:45682481-45683212	+	4.20026	0.0421299
KLHDC3-202	KLHDC3	ENST00000326974.8_1	chr6:42981951-42989036	+	4.19451	0.0416592
DNMBP-201	DNMBP	ENST00000324109.8_1	chr10:101635334-101769676	-	4.19128	0.011675
SEC62-201	SEC62	ENST00000337002.8_1	chr3:169684553-169716161	+	4.18293	0.0251521
HECTD1-201	HECTD1	ENST00000399332.5_2	chr14:31569324-31676689	-	4.18041	0.0156112
DDX5-210	DDX5	ENST00000578804.5_2	chr17:62496032-62502074	-	4.18031	0.0373488
CDK14-202	CDK14	ENST00000380050.7_1	chr7:90225811-90839905	+	4.1624	0.00441209
TP53INP2-202	TP53INP2	ENST00000374810.7_1	chr20:33292094-33301243	+	4.1577	0.0123949
SLK-202	SLK	ENST00000369755.3_3	chr10:105726959-105788991	+	4.14537	0.0379896
SYNE1-207	SYNE1	ENST00000367255.9_1	chr6:152442819-152958534	-	4.1418	0.0332133
PMAIP1-202	PMAIP1	ENST00000316660.6_1	chr18:57567180-57571538	+	4.14167	0.0190523
PDS5B-201	PDS5B	ENST00000315596.14_2	chr13:33160564-33352157	+	4.13189	0.014444
C12orf76-201	C12orf76	ENST00000309050.9_2	chr12:110478965-110505500	-	4.1315	0.0144177
XKR8-201	XKR8	ENST00000373884.5_1	chr1:28285973-28294607	+	4.12887	0.00581715
PSMD5-201	PSMD5	ENST00000210313.7_1	chr9:123578331-123605262	-	4.12021	0.00679484
GRAP2-203	GRAP2	ENST00000420971.5_3	chr22:40322595-40356179	+	4.11986	0.0399399
FOXK2-211	FOXK2	ENST00000575578.1_3	chr17:80544006-80545438	+	4.11765	0.0447378
ETF1-202	ETF1	ENST00000499810.6_1	chr5:137841784-137878918	-	4.11306	0.0303375
LSP1-209	LSP1	ENST00000432093.1_1	chr11:1897707-1908096	+	4.11174	0.0204421
P2RY12-201	P2RY12	ENST00000302632.3_1	chr3:151055168-151102600	-	4.11126	0.0151631
TMEM65-201	TMEM65	ENST00000297632.7_2	chr8:125318430-125384933	-	4.10845	0.000167732
AL358813.2-201	AL358813.2	ENST00000369173.2	chr1:149675978-149676609	+	4.1046	0.0197499
RGP1-201	RGP1	ENST00000378078.4_1	chr9:35749284-35758572	+	4.10142	0.0218324
HELB-201	HELB	ENST00000247815.8_1	chr12:66696325-66741425	+	4.0995	0.0371217
PHF2-201	PHF2	ENST00000359246.8_1	chr9:96338689-96441869	+	4.09575	0.0107934
PTPN4-201	PTPN4	ENST00000263708.6_1	chr2:120517207-120741394	+	4.09175	0.0235472
HIST2H2AC-201	HIST2H2AC	ENST00000331380.3_1	chr1:149858525-149858914	+	4.06902	0.0465752
MAML2-201	MAML2	ENST00000524717.5_1	chr11:95709762-96076344	-	4.06633	0.0326925
VCAN-201	VCAN	ENST00000265077.7_1	chr5:82767284-82878122	+	4.06553	0.034092
BIN1-202	BIN1	ENST00000316724.9_1	chr2:127805603-127864931	-	4.06423	0.00283394
GCC2-201	GCC2	ENST00000309863.10_1	chr2:109065017-109125854	+	4.05283	0.0251187
HIST1H2BG-001	HIST1H2BG	ENST00000244601.3	chr6:26216428-26216872	-	4.05025	0.00130529
ADIPOR2-201	ADIPOR2	ENST00000357103.4_1	chr12:1800193-1897844	+	4.0453	0.0390113
NUCB1-206	NUCB1	ENST00000451312.5_3	chr19:49403823-49409098	+	4.04528	0.034149
LPCAT1-201	LPCAT1	ENST00000283415.3_1	chr5:1461538-1524092	-	4.04417	0.0277125
ABCB8-202	ABCB8	ENST00000358849.8_1	chr7:150725510-150744869	+	4.03242	0.0209255
TIGD3-201	TIGD3	ENST00000309880.5_1	chr11:65122238-65125084	+	4.02584	0.0249
HTT-201	HTT	ENST00000355072.9_1	chr4:3076408-3245686	+	4.01539	0.0164085
ST6GALNAC6-205	ST6GALNAC6	ENST00000373146.5_1	chr9:130647600-130661932	-	4.01505	1.58695e-05
AKT1-208	AKT1	ENST00000554581.5_1	chr14:105235686-105260461	-	4.01392	0.0218546
RBM23-203	RBM23	ENST00000359890.7_2	chr14:23362415-23388393	-	4.0137	0.00703408
SMARCA5-201	SMARCA5	ENST00000283131.3_1	chr4:144434616-144478639	+	4.01247	0.0338341
SETDB2-203	SETDB2	ENST00000354234.8_1	chr13:50018510-50069139	+	4.01151	0.00797195
ZDHHC20-202	ZDHHC20	ENST00000382466.7_2	chr13:21946712-22033508	-	4.01082	0.049276
MRPS21-201	MRPS21	ENST00000581066.2_1	chr1:150266340-150281414	+	4.01048	0.0199328
CRKL-201	CRKL	ENST00000354336.7_1	chr22:21271714-21308037	+	4.00969	0.0221808
SERPINA1-205	SERPINA1	ENST00000404814.8_1	chr14:94844726-94856999	-	4.00581	0.00499122
RNF141-201	RNF141	ENST00000265981.6_1	chr11:10533225-10562764	-	4.00158	0.0152351
CXorf38-203	CXorf38	ENST00000378426.5_2	chrX:40486173-40506806	-	3.99527	0.00244102
HECTD4-202	HECTD4	ENST00000377560.9_1	chr12:112597994-112820243	-	3.98591	0.0342638
C20orf194-201	C20orf194	ENST00000252032.9_1	chr20:3229951-3388272	-	3.98529	0.0100191
SH3GLB2-203	SH3GLB2	ENST00000372564.7_1	chr9:131769315-131790579	-	3.98292	0.00854938
RALGAPA2-204	RALGAPA2	ENST00000430436.5_2	chr20:20370196-20620544	-	3.97737	0.000476857
KSR1-204	KSR1	ENST00000398988.7_3	chr17:25799036-25953464	+	3.97542	0.0477577
SEC23A-202	SEC23A	ENST00000537403.5_1	chr14:39501123-39557927	-	3.97541	0.0403689
SENP3-201	SENP3	ENST00000321337.11_1	chr17:7465192-7475287	+	3.97214	0.0252059
C2CD5-201	C2CD5	ENST00000333957.8_1	chr12:22601517-22697480	-	3.96937	0.0177033
SNX27-203	SNX27	ENST00000368843.7_2	chr1:151584558-151671567	+	3.96871	0.0131172
RC3H2-203	RC3H2	ENST00000373670.5_1	chr9:125606835-125660389	-	3.9598	0.0200019
PPM1M-201	PPM1M	ENST00000296487.8_2	chr3:52280186-52284611	+	3.95891	0.00817939
KLC2-202	KLC2	ENST00000394065.2_1	chr11:66028384-66035330	+	3.95089	0.00645095
TSR1-201	TSR1	ENST00000301364.9_1	chr17:2225797-2240801	-	3.9496	0.0153238
EFCAB14-201	EFCAB14	ENST00000371933.7_1	chr1:47140831-47184736	-	3.94959	0.0384228
FAM192A-201	FAM192A	ENST00000309137.12_1	chr16:57186378-57219976	-	3.94135	0.0335155
ETNK1-201	ETNK1	ENST00000266517.8_4	chr12:22778009-22843599	+	3.93669	0.0108986
VENTX-201	VENTX	ENST00000325980.9_1	chr10:135050908-135055433	+	3.93238	0.0499701
BICD1-207	BICD1	ENST00000551848.1_1	chr12:32259769-32261730	+	3.93159	0.0470281
WDR77-201	WDR77	ENST00000235090.9_1	chr1:111982512-111991998	-	3.93095	0.0416145
ICE1-201	ICE1	ENST00000296564.8_3	chr5:5422807-5490347	+	3.92842	0.0382334
ZDHHC7-201	ZDHHC7	ENST00000313732.8_1	chr16:85007787-85045141	-	3.92413	0.011711
MAP2K6-206	MAP2K6	ENST00000590474.5_1	chr17:67410839-67539472	+	3.92105	0.0237171
VPS26A-202	VPS26A	ENST00000373382.5_1	chr10:70883268-70932617	+	3.92023	0.023312
PPIL2-201	PPIL2	ENST00000335025.12_1	chr22:22020298-22054304	+	3.91691	0.0486712
AMFR-201	AMFR	ENST00000290649.9_2	chr16:56395364-56459450	-	3.91459	0.0123682
GOLPH3-201	GOLPH3	ENST00000265070.6_1	chr5:32124810-32174456	-	3.90413	0.00375147
ARMC6-206	ARMC6	ENST00000535612.5_2	chr19:19144387-19168987	+	3.89654	0.00172247
DOLK-201	DOLK	ENST00000372586.3_1	chr9:131707809-131709898	-	3.89203	0.0396074
KIAA1191-201	KIAA1191	ENST00000298569.8_1	chr5:175773064-175788971	-	3.89056	0.0107031
DYRK2-202	DYRK2	ENST00000344096.3_1	chr12:68042501-68059186	+	3.88584	0.0139457
WASHC1-201	WASHC1	ENST00000442898.4_1	chr9:14521-29739	-	3.88101	0.0108732
HMOX2-208	HMOX2	ENST00000570646.5_1	chr16:4525925-4560348	+	3.87498	0.0074491
SENP5-201	SENP5	ENST00000323460.9_1	chr3:196594727-196661585	+	3.87139	0.00615607
CEP104-202	CEP104	ENST00000378230.7_1	chr1:3728645-3773763	-	3.86402	0.00563051
RBM14-201	RBM14	ENST00000310137.4_1	chr11:66384053-66394818	+	3.8556	0.00209575
CABIN1-203	CABIN1	ENST00000398319.6_1	chr22:24407868-24574596	+	3.84746	0.04226
ZNF496-201	ZNF496	ENST00000294753.8_1	chr1:247460714-247495045	-	3.84693	0.00111688
HERPUD2-202	HERPUD2	ENST00000396081.5_1	chr7:35672269-35734745	-	3.84254	0.0332272
MLXIP-001	MLXIP	ENST00000319080.7	chr12:122516628-122631894	+	3.84181	0.0131991
MRNIP-204	MRNIP	ENST00000518219.5_1	chr5:179264276-179285808	-	3.83816	0.0439431
CANT1-201	CANT1	ENST00000302345.6_1	chr17:76987799-77005899	-	3.83536	0.0498905
ATAD2B-201	ATAD2B	ENST00000238789.9_1	chr2:23971534-24149984	-	3.83029	0.0429306
ENOPH1-201	ENOPH1	ENST00000273920.7_1	chr4:83351715-83382244	+	3.821	0.0456005
ZNF384-201	ZNF384	ENST00000319770.7_1	chr12:6775643-6798676	-	3.81485	0.00285211
GLRX3-202	GLRX3	ENST00000368644.5_1	chr10:131934663-131981145	+	3.81303	0.000877948
FAM212B-201	FAM212B	ENST00000357260.5_2	chr1:112264686-112282046	-	3.8122	0.00058147
PLD4-201	PLD4	ENST00000392593.8_1	chr14:105391160-105404127	+	3.80991	6.14803e-07
ST8SIA4-201	ST8SIA4	ENST00000231461.9_1	chr5:100142639-100238970	-	3.80612	0.0332865
TUBGCP6-204	TUBGCP6	ENST00000439308.6_1	chr22:50656118-50683400	-	3.80172	0.0474491
NUP43-201	NUP43	ENST00000340413.6_1	chr6:150045451-150067708	-	3.79445	0.00936325
CRTC1-202	CRTC1	ENST00000338797.10_1	chr19:18794488-18893143	+	3.78684	0.0100959
HIST1H2BJ-203	HIST1H2BJ	ENST00000607124.1_1	chr6:27093676-27100529	-	3.78667	0.0067162
HMGXB3-206	HMGXB3	ENST00000613459.4_1	chr5:149379609-149432705	+	3.78534	0.0074666
RABEP2-202	RABEP2	ENST00000358201.8_2	chr16:28915742-28937073	-	3.78426	0.0145861
TCP11L2-204	TCP11L2	ENST00000548428.1_1	chr12:106697271-106708271	+	3.77484	0.00228292
FAM111A-204	FAM111A	ENST00000528737.5_1	chr11:58910221-58922512	+	3.76863	0.00117322
FMNL1-208	FMNL1	ENST00000589911.1_3	chr17:43322691-43323920	+	3.75269	0.0178484
RCOR1-201	RCOR1	ENST00000262241.6_1	chr14:103058998-103196913	+	3.7492	0.0186123
MYO18A-224	MYO18A	ENST00000636100.1_1	chr17:27401766-27409456	-	3.74558	0.00584575
GNPTAB-201	GNPTAB	ENST00000299314.11_1	chr12:102139275-102224716	-	3.74379	0.0403161
TCF7L1-201	TCF7L1	ENST00000282111.3_1	chr2:85360533-85537511	+	3.74194	0.000136293
ANP32E-208	ANP32E	ENST00000583931.5_3	chr1:150190717-150208504	-	3.74027	0.0460793
ATP1A1-211	ATP1A1	ENST00000537345.5_1	chr1:116916489-116947394	+	3.73936	0.0492767
MRPL19-202	MRPL19	ENST00000393909.6_1	chr2:75873909-75884986	+	3.73815	0.0169257
PDZD8-201	PDZD8	ENST00000334464.6_1	chr10:119036785-119134978	-	3.73446	0.00162714
PTP4A2-218	PTP4A2	ENST00000602725.5_1	chr1:32372022-32385084	-	3.73227	0.0108544
ZBTB42-201	ZBTB42	ENST00000342537.7_1	chr14:105267250-105271049	+	3.72894	0.00299839
LACTB-202	LACTB	ENST00000413507.3_1	chr15:63414032-63423670	+	3.72536	0.0213765
PER1-201	PER1	ENST00000317276.8_1	chr17:8043790-8055753	-	3.72381	0.0186968
MTCH2-201	MTCH2	ENST00000302503.7_1	chr11:47638868-47664175	-	3.71165	0.0178905
RP2-201	RP2	ENST00000218340.3_1	chrX:46696375-46741793	+	3.69564	0.0480311
ZZZ3-202	ZZZ3	ENST00000370801.7_1	chr1:78030185-78148343	-	3.69321	3.14044e-05
EIF4EBP2-201	EIF4EBP2	ENST00000373218.4_1	chr10:72164135-72188374	+	3.68908	0.0229821
LARS2-203	LARS2	ENST00000415258.5_1	chr3:45430053-45590913	+	3.68895	0.021852
HIVEP2-203	HIVEP2	ENST00000367604.6_2	chr6:143072615-143267502	-	3.68537	0.00833704
PHKB-205	PHKB	ENST00000564873.1_2	chr16:47496578-47533742	+	3.68074	0.0466648
GPD2-201	GPD2	ENST00000310454.10_1	chr2:157291953-157442915	+	3.68051	0.00824972
BAG1-210	BAG1	ENST00000634734.1_3	chr9:33252469-33264672	-	3.67938	0.00194719
TMEM183A-201	TMEM183A	ENST00000367242.3_1	chr1:202976514-202993976	+	3.67789	0.0339799
CAMKK2-201	CAMKK2	ENST00000324774.9_1	chr12:121675500-121736111	-	3.67729	0.0489178
HERC2-201	HERC2	ENST00000261609.11_1	chr15:28356186-28567298	-	3.67515	0.00285382
CLNS1A-204	CLNS1A	ENST00000525428.5_1	chr11:77325575-77348850	-	3.67284	0.0238537
AP1S2-202	AP1S2	ENST00000380291.5_1	chrX:15848182-15872927	-	3.66876	0.0123751
GNB4-201	GNB4	ENST00000232564.7_1	chr3:179113877-179169378	-	3.66862	0.0173209
APPL1-201	APPL1	ENST00000288266.7_1	chr3:57261765-57307496	+	3.66681	0.035841
DPP8-203	DPP8	ENST00000341861.9_1	chr15:65734801-65809611	-	3.66452	0.00811176
FAM208A-209	FAM208A	ENST00000493960.6_2	chr3:56656766-56717045	-	3.66445	0.0384852
TMEM165-201	TMEM165	ENST00000381334.9_1	chr4:56262124-56292339	+	3.65962	0.0258455
GLCCI1-201	GLCCI1	ENST00000223145.9_1	chr7:8008425-8128710	+	3.65793	0.0148447
SNTB2-201	SNTB2	ENST00000336278.8_1	chr16:69221032-69342955	+	3.65529	0.0238235
SLC16A3-211	SLC16A3	ENST00000581287.5_1	chr17:80191563-80197962	+	3.65004	0.0405746
TUBGCP2-210	TUBGCP2	ENST00000543663.5_1	chr10:135092134-135122660	-	3.64392	0.0308775
AKAP11-201	AKAP11	ENST00000025301.3_1	chr13:42846289-42897403	+	3.64292	0.00938435
ZNF148-201	ZNF148	ENST00000360647.8_1	chr3:124944405-125094198	-	3.6398	0.0437655
SMARCA2-209	SMARCA2	ENST00000382203.5_1	chr9:2021945-2193624	+	3.63749	0.0321316
PSMD3-201	PSMD3	ENST00000264639.8_1	chr17:38137050-38154213	+	3.63676	0.0170494
NOTCH2-207	NOTCH2	ENST00000602566.5_1	chr1:120535404-120596839	-	3.635	0.0397453
FECH-201	FECH	ENST00000262093.9_1	chr18:55215515-55254004	-	3.62534	0.0185296
GABBR1-205	GABBR1	ENST00000377034.8_1	chr6:29570015-29600962	-	3.62398	0.00498841
PHOSPHO1-202	PHOSPHO1	ENST00000413580.5_1	chr17:47300732-47308128	-	3.62251	0.000351435
PRPF38A-201	PRPF38A	ENST00000257181.9_1	chr1:52870236-52886511	+	3.60982	0.0201032
TRPM2-203	TRPM2	ENST00000397928.5_3	chr21:45773139-45862964	+	3.60043	0.0109876
PSMD14-201	PSMD14	ENST00000409682.7_1	chr2:162164549-162268228	+	3.59797	0.019594
IRAK3-201	IRAK3	ENST00000261233.8_1	chr12:66582659-66648402	+	3.58514	0.00415773
FBXO42-201	FBXO42	ENST00000375592.7_1	chr1:16573334-16678949	-	3.57812	0.0139973
BUB3-203	BUB3	ENST00000368865.8_1	chr10:124913793-124929983	+	3.57771	0.0147808
OSCAR-208	OSCAR	ENST00000611261.4_1	chr19:54597935-54605994	-	3.57066	9.61617e-05
WHAMM-201	WHAMM	ENST00000286760.5_1	chr15:83478380-83504860	+	3.56682	0.0420092
REEP5-202	REEP5	ENST00000379638.8_1	chr5:112212076-112258236	-	3.5648	0.0237783
STAG1-202	STAG1	ENST00000383202.6_1	chr3:136055075-136471210	-	3.56283	0.00538529
RTL10-202	RTL10	ENST00000405640.1_1	chr22:19833669-19842409	-	3.55205	0.00408544
PDS5A-201	PDS5A	ENST00000303538.12_1	chr4:39824483-39979576	-	3.55204	0.0314607
MARCH9-201	MARCH9	ENST00000266643.5_1	chr12:58148881-58154190	+	3.55118	0.0292049
ZNF319-201	ZNF319	ENST00000299237.2_1	chr16:58028572-58033762	-	3.55106	0.0354805
ATXN7L1-202	ATXN7L1	ENST00000419735.7_1	chr7:105245514-105517050	-	3.54354	0.0455245
SIK1-201	SIK1	ENST00000270162.6_1	chr21:44834395-44847008	-	3.54263	0.0320624
SMARCD3-203	SMARCD3	ENST00000392811.6_1	chr7:150936059-150974538	-	3.5372	0.044583
SON-202	SON	ENST00000356577.8_3	chr21:34914924-34949787	+	3.53685	0.0271929
COL6A2-201	COL6A2	ENST00000300527.8_1	chr21:47518011-47552763	+	3.53267	0.00805306
CCT6A-201	CCT6A	ENST00000275603.8_1	chr7:56119323-56131682	+	3.52602	0.0205225
FOXJ3-204	FOXJ3	ENST00000372572.5_2	chr1:42642210-42800636	-	3.52398	0.0487752
PSMD7-201	PSMD7	ENST00000219313.8_1	chr16:74330673-74340186	+	3.52249	0.0435507
SMPD3-201	SMPD3	ENST00000219334.9_1	chr16:68392228-68482591	-	3.52167	0.000545488
TMEM110-201	TMEM110	ENST00000355083.9_1	chr3:52870772-52931612	-	3.51833	0.0249855
CEP350-202	CEP350	ENST00000367607.7_2	chr1:179923873-180084015	+	3.51567	0.0170272
SMC6-207	SMC6	ENST00000448223.6_1	chr2:17845079-17935070	-	3.51173	0.0335097
MIF4GD-204	MIF4GD	ENST00000577542.5_1	chr17:73262345-73267236	-	3.51052	0.0258684
SUDS3-204	SUDS3	ENST00000543473.1_1	chr12:118814185-118855836	+	3.48958	0.0298474
NBPF20-001	NBPF20	ENST00000369202.1	chr1:148250249-148347051	-	3.48604	0.0461468
PIK3C2B-202	PIK3C2B	ENST00000367187.7_1	chr1:204391756-204459552	-	3.47692	0.00380808
LONRF1-201	LONRF1	ENST00000398246.7_1	chr8:12579403-12612999	-	3.47017	0.0442142
IFIT2-203	IFIT2	ENST00000638108.1_2	chr10:91043451-91068657	+	3.46392	0.00346434
AC132186.1-201	AC132186.1	ENST00000544589.1	chr16:66516775-66519747	-	3.46227	0.00941618
ANKRD9-201	ANKRD9	ENST00000286918.8_2	chr14:102968097-102976128	-	3.46199	0.0191287
SPATA5-201	SPATA5	ENST00000274008.4_1	chr4:123844229-124240605	+	3.45883	0.0185884
CLEC16A-203	CLEC16A	ENST00000409790.5_2	chr16:11038345-11276046	+	3.45829	0.046283
POM121C-208	POM121C	ENST00000615331.4_1	chr7:75046069-75115548	-	3.45386	0.0131098
ZXDB-201	ZXDB	ENST00000374888.2_1	chrX:57618085-57623978	+	3.45355	0.0304334
TARBP1-201	TARBP1	ENST00000040877.1_1	chr1:234527059-234614849	-	3.4525	0.00972902
CARD6-201	CARD6	ENST00000254691.9_2	chr5:40841286-40855456	+	3.44979	0.00155109
ETFA-203	ETFA	ENST00000557943.5_1	chr15:76507696-76603810	-	3.44962	0.0345779
MC1R-202	MC1R	ENST00000555147.1_1	chr16:89984287-89987385	+	3.4412	0.0269878
INPP4A-202	INPP4A	ENST00000409016.8_1	chr2:99061317-99210853	+	3.43595	0.0393102
TPP1-201	TPP1	ENST00000299427.10_2	chr11:6633994-6640692	-	3.42937	0.000448637
SENP2-201	SENP2	ENST00000296257.9_1	chr3:185303962-185351339	+	3.42282	0.0200432
SPIDR-201	SPIDR	ENST00000297423.8_1	chr8:48173167-48648868	+	3.42048	0.0285133
SLC25A22-201	SLC25A22	ENST00000320230.9_1	chr11:790475-796263	-	3.41812	0.0355124
LSG1-201	LSG1	ENST00000265245.9_1	chr3:194361517-194393206	-	3.40983	0.0251196
CRK-201	CRK	ENST00000300574.2_1	chr17:1323983-1359552	-	3.40962	0.0030175
AFF4-201	AFF4	ENST00000265343.9_1	chr5:132211071-132299326	-	3.40792	0.0113601
UBE2O-201	UBE2O	ENST00000319380.11_3	chr17:74385532-74449288	-	3.39934	0.0130406
CHSY1-201	CHSY1	ENST00000254190.3_1	chr15:101715928-101792137	-	3.39722	0.0438489
FBXO38-202	FBXO38	ENST00000340253.9_1	chr5:147763498-147822399	+	3.39571	0.0388333
PMF1-202	PMF1	ENST00000368277.3_2	chr1:156182798-156209833	+	3.38914	0.0236809
C14orf80-205	C14orf80	ENST00000392523.8_1	chr14:105957592-105965519	+	3.38007	0.0357219
HEBP2-204	HEBP2	ENST00000607197.5_1	chr6:138725356-138743334	+	3.36938	0.00579602
USP7-201	USP7	ENST00000344836.8_1	chr16:8985951-9057341	-	3.36494	0.0360067
FKRP-201	FKRP	ENST00000318584.9_1	chr19:47249303-47261742	+	3.35855	0.0400872
SRPK2-201	SRPK2	ENST00000357311.7_1	chr7:104756824-104909462	-	3.35561	0.0430331
KLHL28-202	KLHL28	ENST00000396128.8_1	chr14:45393522-45431168	-	3.3539	0.0451584
KAT7-201	KAT7	ENST00000259021.8_1	chr17:47865917-47912392	+	3.35108	0.0164805
SMURF1-201	SMURF1	ENST00000361125.1_1	chr7:98625064-98741723	-	3.34883	0.0312202
DOPEY2-202	DOPEY2	ENST00000399151.3_1	chr21:37536833-37666572	+	3.34707	0.0368672
PMS1-213	PMS1	ENST00000441310.6_2	chr2:190649107-190742355	+	3.34507	0.0109543
ZNF765-201	ZNF765	ENST00000396408.7_1	chr19:53898403-53915260	+	3.34077	0.0349525
OSBPL1A-201	OSBPL1A	ENST00000319481.7_1	chr18:21742008-21977823	-	3.33776	0.0247734
ARMC5-203	ARMC5	ENST00000457010.6_3	chr16:31470145-31478487	+	3.33703	0.0178893
UTP18-201	UTP18	ENST00000225298.11_1	chr17:49337889-49375294	+	3.33498	0.0349403
NUP107-201	NUP107	ENST00000229179.8_1	chr12:69080514-69139589	+	3.32642	0.0205575
C19orf38-201	C19orf38	ENST00000397820.4_1	chr19:10959078-10980466	+	3.3263	0.000191668
MTMR1-208	MTMR1	ENST00000445323.6_2	chrX:149861883-149933575	+	3.32467	0.0373036
SFXN5-201	SFXN5	ENST00000272433.6_1	chr2:73169165-73298965	-	3.31754	0.0276155
RASSF2-202	RASSF2	ENST00000379400.7_1	chr20:4760669-4804291	-	3.30984	0.0197071
KLC1-204	KLC1	ENST00000348520.10_2	chr14:104095514-104180586	+	3.30287	0.0416244
ITPRIPL1-201	ITPRIPL1	ENST00000361124.5_1	chr2:96991961-96996255	+	3.29962	0.0309673
NEK9-201	NEK9	ENST00000238616.9_1	chr14:75546056-75593783	-	3.29439	0.014458
CHML-201	CHML	ENST00000366553.2_2	chr1:241792155-241803556	-	3.29306	0.0151475
ZNF706-209	ZNF706	ENST00000520347.5_1	chr8:102211166-102217515	-	3.29093	0.0377071
INTS6-203	INTS6	ENST00000442263.4_1	chr13:52010562-52027151	-	3.28523	0.00174179
CNTRL-207	CNTRL	ENST00000373855.5_2	chr9:123837290-123939886	+	3.27765	0.0470827
PPP4R2-201	PPP4R2	ENST00000356692.9_1	chr3:73045936-73118350	+	3.26448	0.0334088
ZNF696-201	ZNF696	ENST00000330143.7_1	chr8:144373559-144380231	+	3.26431	0.000165624
FIZ1-201	FIZ1	ENST00000221665.4_1	chr19:56102737-56110893	-	3.26118	0.0288792
CCDC94-201	CCDC94	ENST00000262962.11_1	chr19:4247076-4269087	+	3.26031	5.41775e-06
SRGAP2-001	SRGAP2	ENST00000295713.5	chr1:206516200-206637776	+	3.25351	0.0281105
SERBP1-203	SERBP1	ENST00000370994.8_2	chr1:67873493-67896098	-	3.25241	0.0462566
GMDS-202	GMDS	ENST00000380815.4_2	chr6:1624041-2245926	-	3.25233	0.0394394
DDX5-213	DDX5	ENST00000579996.5_1	chr17:62498188-62499553	-	3.25188	0.0307199
OS9-201	OS9	ENST00000257966.12_1	chr12:58087928-58115338	+	3.25012	0.00674198
BRD7-201	BRD7	ENST00000394688.7_1	chr16:50349868-50402845	-	3.24349	0.0406981
MIEF2-201	MIEF2	ENST00000323019.8_1	chr17:18163848-18169866	+	3.24306	0.0432667
C1QBP-201	C1QBP	ENST00000225698.8_1	chr17:5336097-5342475	-	3.23986	0.0318307
MTOR-201	MTOR	ENST00000361445.8_2	chr1:11166592-11322564	-	3.22846	0.00821837
MGME1-203	MGME1	ENST00000377710.9_1	chr20:17949556-17971765	+	3.21966	0.0124336
KIF22-203	KIF22	ENST00000561482.5_1	chr16:29802040-29816705	+	3.21455	0.0332589
MYO5A-205	MYO5A	ENST00000399231.7_1	chr15:52599480-52821247	-	3.21455	0.021589
LGALS12-201	LGALS12	ENST00000255684.9_1	chr11:63273556-63284239	+	3.21017	1.3135e-05
DDX54-202	DDX54	ENST00000314045.11_1	chr12:113594979-113623284	-	3.20969	0.00195344
CDH23-201	CDH23	ENST00000224721.10_1	chr10:73156691-73575704	+	3.20699	0.00637775
ANKRD36-201	ANKRD36	ENST00000420699.6_3	chr2:97779233-97930258	+	3.20596	0.0350395
PLD3-206	PLD3	ENST00000409587.5_1	chr19:40854592-40884390	+	3.20307	0.040104
SMC1A-202	SMC1A	ENST00000375340.10_1	chrX:53401070-53449677	-	3.19842	0.0242968
EVI2B-201	EVI2B	ENST00000330927.4_1	chr17:29630784-29641130	-	3.19841	0.0274592
MYOF-202	MYOF	ENST00000359263.8_1	chr10:95066187-95241951	-	3.1958	0.015247
TTC27-201	TTC27	ENST00000317907.8_1	chr2:32853129-33046118	+	3.19338	0.0219559
SPECC1L-201	SPECC1L	ENST00000314328.13_1	chr22:24666808-24813708	+	3.18654	0.00730577
SPINT2-201	SPINT2	ENST00000301244.11_1	chr19:38755098-38783254	+	3.18545	0.0443451
LCOR-204	LCOR	ENST00000371103.8_2	chr10:98592039-98724198	+	3.17589	0.00590679
FMNL1-206	FMNL1	ENST00000587489.5_1	chr17:43318442-43324685	+	3.17475	0.0475634
CAMK2D-201	CAMK2D	ENST00000296402.9_1	chr4:114372188-114683083	-	3.17378	0.0291704
GBE1-201	GBE1	ENST00000429644.6_1	chr3:81538850-81811312	-	3.17172	0.0320325
MDM2-202	MDM2	ENST00000258149.9_1	chr12:69201956-69244466	+	3.16729	0.0209566
DNAJB12-201	DNAJB12	ENST00000338820.7_1	chr10:74092588-74114907	-	3.16531	0.0101769
ZNF646-202	ZNF646	ENST00000394979.2_1	chr16:31087223-31095340	+	3.16463	0.0151791
CMPK1-203	CMPK1	ENST00000371873.9_1	chr1:47799469-47844511	+	3.16318	0.0211604
COX7A2L-202	COX7A2L	ENST00000378669.5_1	chr2:42576478-42596150	-	3.15721	0.0137182
PRPF40A-202	PRPF40A	ENST00000410080.5_1	chr2:153508107-153574495	-	3.15109	0.00532614
TRIOBP-204	TRIOBP	ENST00000406386.7_1	chr22:38093011-38172563	+	3.14537	0.00572122
CDH23-207	CDH23	ENST00000442677.3_1	chr10:73405673-73477664	+	3.13693	0.00118837
EYA3-203	EYA3	ENST00000373871.7_1	chr1:28296855-28415207	-	3.1355	0.033845
MAPKBP1-202	MAPKBP1	ENST00000457542.6_2	chr15:42066632-42120053	+	3.13054	0.0193671
SPPL2A-201	SPPL2A	ENST00000261854.9_2	chr15:50994463-51058005	-	3.13033	0.0140402
OTULIN-201	OTULIN	ENST00000284274.4_1	chr5:14664857-14699820	+	3.1254	0.00372233
PDE3B-201	PDE3B	ENST00000282096.8_1	chr11:14665269-14893590	+	3.11536	0.0088867
GNAI3-201	GNAI3	ENST00000369851.5_1	chr1:110091233-110160943	+	3.11405	0.0100309
ST3GAL6-202	ST3GAL6	ENST00000394162.5_1	chr3:98451548-98514689	+	3.11112	0.0188941
MARCH7-201	MARCH7	ENST00000259050.8_1	chr2:160569010-160627538	+	3.10692	0.030855
PIGC-202	PIGC	ENST00000367728.1_1	chr1:172410597-172413226	-	3.10096	0.0366397
ZDHHC24-201	ZDHHC24	ENST00000310442.4_2	chr11:66303369-66313709	-	3.09937	0.0495802
FNIP1-205	FNIP1	ENST00000615660.4_1	chr5:130977408-131132756	-	3.09795	0.0444015
APPBP2-201	APPBP2	ENST00000083182.7_1	chr17:58520510-58603580	-	3.09576	0.0392378
VPS13C-203	VPS13C	ENST00000395896.8_1	chr15:62156505-62352647	-	3.09324	0.0045448
GPR108-201	GPR108	ENST00000264080.11_3	chr19:6729925-6737614	-	3.07116	0.00231584
AP5S1-205	AP5S1	ENST00000615891.1_1	chr20:3801203-3809484	+	3.06892	0.00606459
LIN7C-201	LIN7C	ENST00000278193.6_1	chr11:27516123-27528320	-	3.06707	0.018139
RBM26-207	RBM26	ENST00000622611.4_1	chr13:79893003-79980356	-	3.06435	0.0118573
ARIH1-201	ARIH1	ENST00000379887.8_2	chr15:72766667-72895326	+	3.0604	0.0107457
RNF111-201	RNF111	ENST00000348370.8_1	chr15:59279854-59389618	+	3.05898	0.00627905
C1GALT1-205	C1GALT1	ENST00000436587.6_1	chr7:7222246-7288278	+	3.05163	0.0499439
SNRPF-201	SNRPF	ENST00000266735.9_1	chr12:96252706-96260831	+	3.04046	0.0315751
SLFN14-201	SLFN14	ENST00000415846.3_1	chr17:33875144-33885117	-	3.03998	0.0288599
PDCD6IP-201	PDCD6IP	ENST00000307296.7_1	chr3:33839844-33911194	+	3.03809	0.0259806
CDAN1-201	CDAN1	ENST00000356231.3_3	chr15:43015760-43029324	-	3.03665	0.00234984
EIF4G3-212	EIF4G3	ENST00000602326.5_1	chr1:21132976-21503343	-	3.03635	0.0255723
MBD4-203	MBD4	ENST00000429544.6_1	chr3:129149787-129158872	-	3.03538	0.00627604
PPP6C-203	PPP6C	ENST00000451402.5_1	chr9:127908853-127952218	-	3.03077	0.00657369
ARRDC4-201	ARRDC4	ENST00000268042.6_1	chr15:98503928-98517068	+	3.03074	0.0195769
MFHAS1-201	MFHAS1	ENST00000276282.6_1	chr8:8640864-8751155	-	3.02884	0.00878269
EEFSEC-201	EEFSEC	ENST00000254730.10_1	chr3:127872297-128127489	+	3.02054	0.0485851
ATP13A1-202	ATP13A1	ENST00000357324.10_1	chr19:19756012-19774502	-	3.01882	0.0136535
RICTOR-202	RICTOR	ENST00000357387.7_1	chr5:38938021-39074510	-	3.01421	0.0242678
RTL6-201	RTL6	ENST00000341255.3_1	chr22:44888452-44894178	-	3.0078	0.0495597
SPTB-208	SPTB	ENST00000556626.5_3	chr14:65213001-65346601	-	3.00472	0.032217
CD48-201	CD48	ENST00000368045.3_1	chr1:160653309-160681593	-	3.00284	0.00232066
MDFIC-201	MDFIC	ENST00000257724.7_1	chr7:114562209-114659256	+	3.00183	0.00351849
RASSF1-203	RASSF1	ENST00000359365.8_1	chr3:50367219-50378343	-	3.0002	0.00573806
ARHGDIA-217	ARHGDIA	ENST00000584461.5_1	chr17:79826136-79829205	-	2.99799	0.0080137
PHF14-201	PHF14	ENST00000403050.7_1	chr7:11013499-11143282	+	2.99377	0.0336114
KRR1-201	KRR1	ENST00000229214.8_1	chr12:75884641-75905401	-	2.99095	0.0453023
GTF3C4-201	GTF3C4	ENST00000372146.4_1	chr9:135545422-135570342	+	2.9884	0.000479858
RORA-203	RORA	ENST00000335670.10_1	chr15:60780483-61521518	-	2.98603	0.00432659
CPEB4-201	CPEB4	ENST00000265085.9_1	chr5:173315283-173388979	+	2.98443	0.00521061
SLC12A2-201	SLC12A2	ENST00000262461.6_1	chr5:127419458-127525380	+	2.984	0.0358773
ASPRV1-201	ASPRV1	ENST00000320256.5_1	chr2:70187221-70189397	-	2.98086	0.00412935
EIF3L-203	EIF3L	ENST00000412331.6_1	chr22:38244875-38285414	+	2.97459	0.0470895
SREBF1-202	SREBF1	ENST00000355815.8_1	chr17:17715387-17740301	-	2.97196	0.0346399
ATXN1-201	ATXN1	ENST00000244769.8_1	chr6:16299343-16761687	-	2.96729	0.0134066
FYCO1-205	FYCO1	ENST00000535325.5_1	chr3:45959391-46037316	-	2.96247	0.0436408
RRP15-201	RRP15	ENST00000366932.3_1	chr1:218458629-218511325	+	2.96217	0.000420637
KLC1-206	KLC1	ENST00000389744.8_1	chr14:104095564-104153254	+	2.96084	0.000250347
NCOA7-203	NCOA7	ENST00000392477.6_1	chr6:126111909-126253176	+	2.95899	0.00445033
APOL1-201	APOL1	ENST00000319136.8_1	chr22:36649124-36663567	+	2.95836	0.0203038
TACC1-202	TACC1	ENST00000317827.8_1	chr8:38644722-38710546	+	2.95087	0.0326072
FAM13A-201	FAM13A	ENST00000264344.9_3	chr4:89647106-89978323	-	2.94866	0.0402726
GSK3A-202	GSK3A	ENST00000398249.8_1	chr19:42734342-42746045	-	2.94236	0.00491078
VPS37A-201	VPS37A	ENST00000324849.8_1	chr8:17104080-17155533	+	2.92945	0.0156661
ZNF526-201	ZNF526	ENST00000301215.7_1	chr19:42724423-42732353	+	2.92768	0.0024235
SGTB-201	SGTB	ENST00000381007.8_1	chr5:64961755-65017957	-	2.92386	0.0444129
ACOX1-201	ACOX1	ENST00000293217.9_3	chr17:73937588-73975444	-	2.91691	0.0364485
PTPRJ-201	PTPRJ	ENST00000418331.6_1	chr11:48002113-48189670	+	2.91376	0.0458465
LRPPRC-201	LRPPRC	ENST00000260665.11_1	chr2:44113647-44223144	-	2.91329	0.0465237
CARNMT1-202	CARNMT1	ENST00000376834.7_1	chr9:77595936-77643310	-	2.9128	0.012818
SLC50A1-203	SLC50A1	ENST00000368404.8_1	chr1:155108326-155111329	+	2.91225	0.0455639
MSRB3-201	MSRB3	ENST00000308259.9_1	chr12:65672423-65860687	+	2.89793	0.039684
AVL9-201	AVL9	ENST00000318709.8_1	chr7:32535101-32628333	+	2.89788	0.00948971
SNX30-201	SNX30	ENST00000374232.7_1	chr9:115513118-115637267	+	2.88867	2.69584e-05
SGPP1-201	SGPP1	ENST00000247225.6_1	chr14:64150932-64194757	-	2.88556	0.0416005
AREGB-001	AREGB	ENST00000380846.3	chr4:75480629-75490486	+	2.87142	0.0154821
MEGF8-203	MEGF8	ENST00000378073.5_1	chr19:42829761-42882921	+	2.86988	0.0201182
RAB11FIP2-202	RAB11FIP2	ENST00000369199.4_2	chr10:119764429-119806114	-	2.86734	0.0458506
MUS81-201	MUS81	ENST00000308110.8_1	chr11:65627876-65633910	+	2.85745	0.0351215
ATP6V0E1-203	ATP6V0E1	ENST00000519374.5_1	chr5:172410760-172462448	+	2.8574	0.0329295
MPST-202	MPST	ENST00000397225.2_1	chr22:37419078-37425862	+	2.85443	0.0439413
CASP10-202	CASP10	ENST00000286186.10_1	chr2:202047604-202086388	+	2.8484	0.0407258
AARS-201	AARS	ENST00000261772.12_1	chr16:70286198-70323446	-	2.84691	0.0442839
XYLT2-201	XYLT2	ENST00000017003.6_1	chr17:48423453-48438512	+	2.84602	0.000814175
TAF2-201	TAF2	ENST00000378164.6_1	chr8:120743015-120845103	-	2.84487	0.00117307
GAB3-202	GAB3	ENST00000369575.7_1	chrX:153903530-153979332	-	2.84122	0.0337029
RECQL-204	RECQL	ENST00000444129.6_1	chr12:21621845-21654527	-	2.83716	0.034586
ENTPD6-202	ENTPD6	ENST00000360031.6_2	chr20:25176337-25207365	+	2.83623	0.0346917
SLC19A1-203	SLC19A1	ENST00000417954.5_1	chr21:46913486-46951455	-	2.83599	0.00892797
ZNF776-201	ZNF776	ENST00000317178.9_1	chr19:58258164-58269527	+	2.83468	0.0243875
FBXO33-201	FBXO33	ENST00000298097.7_1	chr14:39866873-39901704	-	2.8343	0.0214602
EIF3F-206	EIF3F	ENST00000531572.1_1	chr11:8016561-8017180	+	2.83376	0.00893783
MDN1-201	MDN1	ENST00000369393.7_1	chr6:90352218-90529442	-	2.83256	0.0089559
STAM-202	STAM	ENST00000377524.7_1	chr10:17686124-17757913	+	2.83213	0.0209425
PAQR7-201	PAQR7	ENST00000374296.3_1	chr1:26187701-26197744	-	2.83016	0.0247969
MYCBP-201	MYCBP	ENST00000397572.4_3	chr1:39328636-39339777	-	2.82295	0.0364284
RALGAPB-201	RALGAPB	ENST00000262879.10_1	chr20:37101459-37207504	+	2.81456	0.0107325
ERGIC1-201	ERGIC1	ENST00000326654.6_1	chr5:172332243-172345338	+	2.81405	0.0209864
TXNDC12-201	TXNDC12	ENST00000371626.8_1	chr1:52485803-52521843	-	2.81095	0.0277134
HLA-B-256	HLA-B	ENST00000639848.1_1	chr6:31322257-31324935	-	2.81053	0.00610299
GCLM-201	GCLM	ENST00000370238.7_1	chr1:94350761-94374966	-	2.80123	0.00237717
PCNT-201	PCNT	ENST00000359568.9_1	chr21:47744036-47865682	+	2.79783	0.0256313
IMPAD1-201	IMPAD1	ENST00000262644.8_1	chr8:57870492-57906403	-	2.79656	0.0204768
DLAT-201	DLAT	ENST00000280346.10_1	chr11:111895538-111935114	+	2.79184	0.03188
TECPR2-201	TECPR2	ENST00000359520.11_1	chr14:102829300-102968818	+	2.7876	0.0167529
RPS6KA5-207	RPS6KA5	ENST00000614987.4_2	chr14:91314206-91526952	-	2.78594	0.0251948
IL6ST-206	IL6ST	ENST00000381298.6_1	chr5:55230923-55290821	-	2.77999	0.0296106
NR4A2-201	NR4A2	ENST00000339562.8_1	chr2:157180944-157189228	-	2.77531	0.0309028
EXOC2-201	EXOC2	ENST00000230449.8_1	chr6:485133-693111	-	2.77297	0.0222275
GLRX5-201	GLRX5	ENST00000331334.4_1	chr14:96000930-96011055	+	2.76851	0.0264486
CTBP2-203	CTBP2	ENST00000337195.9_1	chr10:126672886-126849082	-	2.76781	0.000344313
EP400-203	EP400	ENST00000333577.8_1	chr12:132434516-132479557	+	2.76644	0.0182038
RBM27-201	RBM27	ENST00000265271.6_1	chr5:145583163-145668695	+	2.7615	0.0400005
CTC1-201	CTC1	ENST00000315684.12_3	chr17:8128139-8151362	-	2.76039	0.036877
DENND1B-211	DENND1B	ENST00000620048.5_2	chr1:197473878-197744623	-	2.75929	0.000130433
ELP2-203	ELP2	ENST00000358232.10_1	chr18:33709834-33760519	+	2.75246	0.00166808
YARS2-201	YARS2	ENST00000324868.12_1	chr12:32899478-32908836	-	2.73337	0.0342509
CEP120-201	CEP120	ENST00000306467.9_1	chr5:122680579-122758997	-	2.73091	0.00663732
PPP3CC-201	PPP3CC	ENST00000240139.9_1	chr8:22298596-22398638	+	2.72607	0.0284372
ACER3-212	ACER3	ENST00000532485.5_1	chr11:76571917-76737841	+	2.72504	0.0392596
RC3H2-201	RC3H2	ENST00000335387.9_1	chr9:125636065-125667494	-	2.72446	0.00262579
ETFB-202	ETFB	ENST00000354232.8_1	chr19:51848423-51860360	-	2.72389	0.0224657
KATNB1-201	KATNB1	ENST00000379661.7_1	chr16:57769642-57791162	+	2.71839	0.0058141
U2SURP-208	U2SURP	ENST00000473835.6_1	chr3:142720381-142779388	+	2.71212	0.0166386
LRIG2-201	LRIG2	ENST00000361127.5_1	chr1:113615831-113674882	+	2.71183	0.00309646
BICRAL-201	BICRAL	ENST00000314073.9_1	chr6:42749765-42836298	+	2.70657	0.0265561
CPSF2-201	CPSF2	ENST00000298875.8_1	chr14:92588281-92638489	+	2.7043	0.00210125
RPS17-201	RPS17	ENST00000330244.10_1	chr15:83205504-83209315	-	2.69682	0.0491004
BTBD1-201	BTBD1	ENST00000261721.8_1	chr15:83685174-83736106	-	2.69252	0.00943593
REPS1-208	REPS1	ENST00000450536.6_1	chr6:139224630-139309394	-	2.69207	0.0049044
THUMPD1-201	THUMPD1	ENST00000381337.6_1	chr16:20744986-20753406	-	2.68798	0.0412502
THAP5-203	THAP5	ENST00000415914.3_1	chr7:108202671-108210167	-	2.68516	0.0414729
SPECC1-205	SPECC1	ENST00000395529.7_1	chr17:19990334-20142740	+	2.67493	0.0200065
FAM156B-203	FAM156B	ENST00000593751.7_1	chrX:52926426-52937583	+	2.67473	0.00127546
FAM220A-201	FAM220A	ENST00000313324.8_3	chr7:6369040-6388590	-	2.67413	0.0315667
PRPF3-201	PRPF3	ENST00000324862.6_1	chr1:150293925-150325671	+	2.6699	0.0497938
FBXL17-205	FBXL17	ENST00000542267.5_1	chr5:107194746-107717799	-	2.66851	0.0444109
ZBTB40-204	ZBTB40	ENST00000404138.5_2	chr1:22778344-22857650	+	2.66781	0.0297501
RNASEH2B-202	RNASEH2B	ENST00000422660.5_1	chr13:51483938-51547881	+	2.66632	0.0242443
CTNND1-228	CTNND1	ENST00000531007.1_1	chr11:57577617-57583483	+	2.6645	0.000789561
UBTF-203	UBTF	ENST00000393606.7_1	chr17:42284484-42297118	-	2.66283	0.0371251
SCAF11-203	SCAF11	ENST00000395453.2_3	chr12:46354238-46384363	-	2.66108	0.0265496
PPP1R3E-201	PPP1R3E	ENST00000452015.8_3	chr14:23764852-23772057	-	2.65848	0.021182
SCAND1-202	SCAND1	ENST00000373991.3_1	chr20:34541551-34547394	-	2.65566	0.0117727
NSMF-208	NSMF	ENST00000437259.5_3	chr9:140342025-140353786	-	2.6537	0.00369574
ACACA-237	ACACA	ENST00000616317.4_1	chr17:35441923-35766871	-	2.64967	0.0376743
AKAP9-201	AKAP9	ENST00000356239.7_1	chr7:91570181-91739987	+	2.64104	0.0086629
ZNF70-201	ZNF70	ENST00000341976.4_2	chr22:24080865-24093279	-	2.63787	0.0413836
NAA15-201	NAA15	ENST00000296543.9_1	chr4:140222609-140312536	+	2.63521	0.00820297
UGGT1-201	UGGT1	ENST00000259253.10_1	chr2:128848885-128953251	+	2.63162	0.00879994
KDM5B-203	KDM5B	ENST00000367265.7_1	chr1:202693619-202778598	-	2.6309	0.0356107
SLC35B2-207	SLC35B2	ENST00000619636.4_1	chr6:44221839-44225089	-	2.60877	0.0472894
CDKAL1-201	CDKAL1	ENST00000274695.8_1	chr6:20534688-21232635	+	2.60735	0.0022621
ESD-204	ESD	ENST00000471867.2_2	chr13:47349521-47355703	-	2.60451	0.0429901
SLC15A2-205	SLC15A2	ENST00000489711.5_1	chr3:121612936-121662949	+	2.59312	0.0334479
MTO1-212	MTO1	ENST00000498286.5_1	chr6:74171301-74218959	+	2.58635	0.002133
TFEB-201	TFEB	ENST00000230323.8_1	chr6:41651716-41702798	-	2.58391	0.0244892
ZBTB20-216	ZBTB20	ENST00000482689.5_2	chr3:114099205-114173664	-	2.58024	0.0133261
AC004832.3-202	AC004832.3	ENST00000439838.5_3	chr22:30805251-30824974	+	2.57979	0.0244172
RALGPS2-203	RALGPS2	ENST00000367634.6_1	chr1:178694282-178890976	+	2.57275	0.0037933
BIVM-ERCC5-205	BIVM-ERCC5	ENST00000639435.1_1	chr13:103451460-103528344	+	2.56925	0.0317773
RBSN-201	RBSN	ENST00000253699.7_1	chr3:15111580-15140655	-	2.56616	0.0262929
RPS27-202	RPS27	ENST00000392558.4_1	chr1:153963238-153964174	+	2.55939	0.04773
ZFYVE28-201	ZFYVE28	ENST00000290974.6_1	chr4:2271325-2420390	-	2.55553	0.0242533
QTRT2-201	QTRT2	ENST00000281273.8_1	chr3:113775584-113807269	+	2.55463	0.02536
XPNPEP3-201	XPNPEP3	ENST00000357137.8_1	chr22:41253102-41328819	+	2.54255	0.0190534
LGALS3BP-201	LGALS3BP	ENST00000262776.7_1	chr17:76967320-76976191	-	2.54247	0.0187067
KPNA6-201	KPNA6	ENST00000373625.7_1	chr1:32573639-32642169	+	2.53495	0.0347518
ALDH2-201	ALDH2	ENST00000261733.6_2	chr12:112204726-112255333	+	2.53451	0.0193162
TSC2-201	TSC2	ENST00000219476.7_1	chr16:2097466-2138713	+	2.51902	0.0136559
NID1-201	NID1	ENST00000264187.6_1	chr1:236139130-236228462	-	2.51861	0.0410013
ISG20L2-201	ISG20L2	ENST00000313146.10_1	chr1:156691683-156698227	-	2.51085	0.00996632
GPATCH2-202	GPATCH2	ENST00000366935.7_1	chr1:217600334-217804424	-	2.50854	0.0282161
CDC40-203	CDC40	ENST00000368932.5_1	chr6:110501344-110553426	+	2.50692	0.00389704
CLASP2-204	CLASP2	ENST00000399362.8_1	chr3:33537737-33759848	-	2.50628	0.0132732
RNGTT-202	RNGTT	ENST00000369485.8_1	chr6:89319991-89673440	-	2.50508	0.0387777
RBM28-201	RBM28	ENST00000223073.6_1	chr7:127937738-127983962	-	2.50182	0.01421
PGM1-202	PGM1	ENST00000371084.7_1	chr1:64058947-64125916	+	2.50177	0.0296593
ZBTB33-201	ZBTB33	ENST00000326624.2_1	chrX:119384607-119392253	+	2.4932	0.0310954
HS1BP3-205	HS1BP3	ENST00000445102.1_3	chr2:20821948-20824652	-	2.49305	0.000416855
POLD3-201	POLD3	ENST00000263681.6_1	chr11:74303575-74354102	+	2.48662	0.0376456
NCL-201	NCL	ENST00000322723.8_1	chr2:232318242-232329305	-	2.47841	0.0146497
ITPR3-201	ITPR3	ENST00000374316.9_1	chr6:33588142-33664351	+	2.47725	0.025719
BMP2K-203	BMP2K	ENST00000502613.1_3	chr4:79780778-79837526	+	2.47674	0.0183175
FAM76B-201	FAM76B	ENST00000358780.9_2	chr11:95502106-95522955	-	2.47356	0.0163998
BAP1-211	BAP1	ENST00000615113.1_1	chr3:52435689-52436177	-	2.46862	0.000668104
ARHGAP27-207	ARHGAP27	ENST00000528273.5_1	chr17:43506718-43511787	-	2.46851	0.0234319
SHARPIN-202	SHARPIN	ENST00000398712.6_1	chr8:145153540-145159093	-	2.46713	0.023208
EIF4E3-204	EIF4E3	ENST00000425534.7_1	chr3:71724567-71774526	-	2.45969	0.0175185
EID1-201	EID1	ENST00000530028.2_2	chr15:49170083-49172380	+	2.4592	0.0439937
TNFAIP8-206	TNFAIP8	ENST00000504771.2_1	chr5:118690009-118735383	+	2.45897	0.0338317
RAPGEF2-201	RAPGEF2	ENST00000264431.8_1	chr4:160188889-160281321	+	2.457	0.001891
MYCT1-201	MYCT1	ENST00000367245.5_3	chr6:153019030-153045702	+	2.45687	0.0153492
AHDC1-202	AHDC1	ENST00000374011.6_1	chr1:27860814-27930143	-	2.45113	0.00260056
AP1G1-201	AP1G1	ENST00000299980.8_2	chr16:71762903-71843104	-	2.44565	0.0333481
SLC23A2-202	SLC23A2	ENST00000379333.5_1	chr20:4833002-4990939	-	2.43714	0.00438354
RAN-202	RAN	ENST00000392369.6_2	chr12:131356615-131360826	+	2.43603	0.00173481
NIP7-201	NIP7	ENST00000254940.9_1	chr16:69373333-69377014	+	2.4292	0.00848134
GPR52-201	GPR52	ENST00000367685.3_1	chr1:174417249-174418336	+	2.42748	0.0129646
TPRG1L-202	TPRG1L	ENST00000378344.6_1	chr1:3541566-3546691	+	2.42171	0.00207403
TBCE-207	TBCE	ENST00000543662.3_4	chr1:235530675-235612281	+	2.42033	0.00594457
TNFRSF10B-201	TNFRSF10B	ENST00000276431.8_1	chr8:22877646-22926692	-	2.4182	0.00874802
POR-201	POR	ENST00000394893.5_1	chr7:75544482-75616173	+	2.41408	0.0281329
CCDC88C-205	CCDC88C	ENST00000553403.1_1	chr14:91845003-91884188	-	2.41336	0.0173684
SMG7-202	SMG7	ENST00000367537.7_2	chr1:183441613-183523328	+	2.39908	0.0335393
SKP1-209	SKP1	ENST00000522552.5_2	chr5:133493029-133512655	-	2.38206	0.00771818
CWC22-202	CWC22	ENST00000410053.7_1	chr2:180809603-180871780	-	2.38	0.045041
PPP2R1A-201	PPP2R1A	ENST00000322088.10_1	chr19:52693292-52732786	+	2.37706	0.0364874
WIZ-201	WIZ	ENST00000263381.11_1	chr19:15530791-15560762	-	2.37331	0.0363779
AMD1-204	AMD1	ENST00000368885.7_1	chr6:111195973-111216916	+	2.37052	0.0347518
TTBK2-201	TTBK2	ENST00000267890.10_4	chr15:43030932-43212677	-	2.36991	0.0384941
PPP1R3F-201	PPP1R3F	ENST00000055335.10_2	chrX:49126317-49144557	+	2.36656	0.046151
ATG2B-202	ATG2B	ENST00000359933.5_1	chr14:96745539-96830207	-	2.36349	0.00246322
TP53BP1-203	TP53BP1	ENST00000382044.8_1	chr15:43695259-43785369	-	2.36163	0.0159518
CHMP4B-201	CHMP4B	ENST00000217402.2_1	chr20:32399110-32442172	+	2.36086	0.021729
ZXDA-201	ZXDA	ENST00000358697.5_1	chrX:57933142-57937254	-	2.35615	0.00070495
ZNF813-201	ZNF813	ENST00000396403.8_1	chr19:53970989-53999509	+	2.35226	0.00191205
SYNGAP1-208	SYNGAP1	ENST00000629380.2_2	chr6:33387847-33425318	+	2.34066	0.00617232
WDR7-201	WDR7	ENST00000254442.7_1	chr18:54318616-54703837	+	2.33753	0.0073303
SLC44A1-201	SLC44A1	ENST00000374720.7_1	chr9:108006903-108159627	+	2.33663	0.0129418
UBA6-201	UBA6	ENST00000322244.9_1	chr4:68478370-68566897	-	2.32712	0.0277339
GAPT-201	GAPT	ENST00000318469.2_1	chr5:57790067-57792185	+	2.32275	0.005649
CUL5-201	CUL5	ENST00000393094.6_1	chr11:107879459-107978503	+	2.32221	0.0497567
TAB3-205	TAB3	ENST00000378933.5_1	chrX:30845559-30993201	-	2.32204	0.0249115
NUDT3-201	NUDT3	ENST00000607016.1_1	chr6:34247456-34360451	-	2.31769	0.0457408
POLR1A-201	POLR1A	ENST00000263857.10_1	chr2:86247339-86333278	-	2.31486	0.00408408
ZNF445-201	ZNF445	ENST00000396077.7_1	chr3:44473212-44519162	-	2.31453	0.00983226
NBPF9-202	NBPF9	ENST00000338347.4	chr1:144811744-144830301	+	2.31072	0.0315897
MLLT3-203	MLLT3	ENST00000380338.8_1	chr9:20341663-20622542	-	2.30384	0.0408278
ZBTB34-202	ZBTB34	ENST00000373452.2_1	chr9:129641627-129648154	+	2.30373	0.0161188
PATJ-203	PATJ	ENST00000371158.6_1	chr1:62208149-62629592	+	2.30269	0.00214376
NBPF15-203	NBPF15	ENST00000577412.5_1	chr1:148560843-148596267	+	2.29854	0.00268795
ZNHIT6-202	ZNHIT6	ENST00000431532.6_2	chr1:86115106-86174116	-	2.29219	0.0169715
SCML4-203	SCML4	ENST00000369022.6_1	chr6:108025308-108145521	-	2.28153	0.00256538
EWSR1-206	EWSR1	ENST00000397938.6_1	chr22:29664007-29696515	+	2.27248	0.0217873
SPIN1-201	SPIN1	ENST00000375859.3_1	chr9:91003334-91093609	+	2.26955	0.0450178
UGGT2-203	UGGT2	ENST00000376747.7_1	chr13:96453834-96705637	-	2.2632	8.50894e-05
WWTR1-203	WWTR1	ENST00000465804.5_1	chr3:149235022-149421060	-	2.25811	0.0443397
UBE4A-201	UBE4A	ENST00000252108.7_1	chr11:118230300-118269926	+	2.23406	0.0164105
TMEM121B-201	TMEM121B	ENST00000331437.3_1	chr22:17597190-17602143	-	2.22851	0.00366442
GFM1-210	GFM1	ENST00000486715.5_1	chr3:158362067-158410364	+	2.21353	0.00461415
ZNF264-201	ZNF264	ENST00000263095.10_1	chr19:57702868-57734214	+	2.20963	0.0414159
RNF19A-211	RNF19A	ENST00000523167.1_1	chr8:101299933-101321754	-	2.20631	0.00956288
AC106774.7-201	AC106774.7	ENST00000638408.1_1	chr5:17521910-17522506	+	2.19638	0.0424107
KIDINS220-201	KIDINS220	ENST00000256707.7_2	chr2:8868987-8977755	-	2.18446	0.0219034
ZFAND5-201	ZFAND5	ENST00000237937.7_1	chr9:74966341-74979508	-	2.17544	0.0396399
ABCE1-201	ABCE1	ENST00000296577.8_1	chr4:146019084-146050331	+	2.17325	0.0143798
TBL1X-201	TBL1X	ENST00000217964.11_1	chrX:9433048-9687783	+	2.17043	0.0331954
C22orf39-202	C22orf39	ENST00000399562.8_1	chr22:19429300-19435755	-	2.16761	0.00936824
AC016586.1-201	AC016586.1	ENST00000535853.1	chr19:4041127-4043154	-	2.16418	0.0105405
FAM156A-221	FAM156A	ENST00000622447.4_1	chrX:52976462-52987681	-	2.16324	0.0272016
NSD3-208	NSD3	ENST00000528627.1_1	chr8:38177273-38184353	-	2.15231	0.0434
SNED1-201	SNED1	ENST00000310397.12_3	chr2:241938255-242034983	+	2.13767	0.000525496
RRN3-201	RRN3	ENST00000198767.10_1	chr16:15153879-15188174	-	2.13677	0.0118612
TOX4-212	TOX4	ENST00000613569.4_1	chr14:21944914-21967319	+	2.13653	0.0314232
LHFPL2-201	LHFPL2	ENST00000380345.6_1	chr5:77781040-77944648	-	2.12564	0.0156119
THUMPD3-201	THUMPD3	ENST00000345094.7_1	chr3:9404736-9428475	+	2.12489	0.0300674
CSRP1-202	CSRP1	ENST00000367306.5_1	chr1:201452658-201478584	-	2.11444	0.00668115
PPP1CC-204	PPP1CC	ENST00000546933.5_1	chr12:111158726-111170788	-	2.10458	0.0270626
ELMO3-202	ELMO3	ENST00000393997.6_1	chr16:67233014-67237932	+	2.10395	0.0133447
COTL1-206	COTL1	ENST00000567786.2_1	chr16:84649610-84651165	-	2.08662	0.0390632
IFI44L-202	IFI44L	ENST00000450498.1_1	chr1:79093670-79095872	+	2.04778	0.0421437
ANO10-201	ANO10	ENST00000292246.7_2	chr3:43407340-43663560	-	2.04457	0.0435871
SUPT7L-204	SUPT7L	ENST00000406540.5_1	chr2:27875919-27886507	-	2.04057	0.0204784
LRRC37A3-211	LRRC37A3	ENST00000584306.5_1	chr17:62850488-62914903	-	2.0348	0.0296806
MIER2-201	MIER2	ENST00000264819.6_1	chr19:301444-344782	-	2.033	0.00771378
DNAJC10-201	DNAJC10	ENST00000264065.11_1	chr2:183580999-183659191	+	2.02146	0.0226345
UBQLN4-201	UBQLN4	ENST00000368309.3_1	chr1:156005092-156023585	-	2.01805	0.0133281
TIMM13-201	TIMM13	ENST00000215570.7_1	chr19:2425622-2427892	-	2.01597	0.00351737
EXT1-201	EXT1	ENST00000378204.6_1	chr8:118806729-119124092	-	2.01465	0.040506
APEX2-201	APEX2	ENST00000374987.3_1	chrX:55026790-55035490	+	2.01016	0.0274269
SRD5A1-201	SRD5A1	ENST00000274192.6_2	chr5:6633456-6674499	+	2.00993	0.00708179
TBC1D4-202	TBC1D4	ENST00000377636.7_1	chr13:75858808-76056250	-	2.00814	0.0412417
CLCF1-201	CLCF1	ENST00000312438.7_1	chr11:67131639-67141208	-	2.007	0.0440983
DNASE1L1-205	DNASE1L1	ENST00000369809.5_1	chrX:153629579-153640427	-	2.00225	0.00794286
HMGB1-206	HMGB1	ENST00000405805.5_1	chr13:31032884-31191734	-	1.99876	0.0480792
INPP5F-201	INPP5F	ENST00000361976.6_1	chr10:121485609-121588790	+	1.99869	0.0498498
NRDE2-201	NRDE2	ENST00000354366.7_1	chr14:90734200-90798481	-	1.99567	0.00600052
MRPL10-201	MRPL10	ENST00000290208.11_1	chr17:45900827-45907039	-	1.99455	0.024693
LRRC37A-201	LRRC37A	ENST00000320254.5_1	chr17:44372497-44415160	+	1.98563	0.0362458
PFAS-201	PFAS	ENST00000314666.10_1	chr17:8152604-8173803	+	1.97585	0.00609088
RRP1B-201	RRP1B	ENST00000340648.5_1	chr21:45079429-45115960	+	1.9678	0.0384344
NXPE3-205	NXPE3	ENST00000491511.6_1	chr3:101498286-101546236	+	1.95587	0.0155231
TMEM106B-201	TMEM106B	ENST00000396667.7_2	chr7:12250926-12282993	+	1.94665	0.0154253
DENND1A-203	DENND1A	ENST00000373624.6_1	chr9:126141933-126692386	-	1.94511	0.0176495
MBTPS1-201	MBTPS1	ENST00000343411.7_1	chr16:84087371-84150511	-	1.94286	0.0234922
ZNF736-202	ZNF736	ENST00000423484.2_1	chr7:63774407-63815238	+	1.9425	0.0402547
PAPOLG-201	PAPOLG	ENST00000238714.7_1	chr2:60983365-61026098	+	1.93886	0.0395278
SOGA1-201	SOGA1	ENST00000237536.8_3	chr20:35405845-35492089	-	1.93384	0.0355711
CARF-202	CARF	ENST00000402905.7_3	chr2:203776937-203851786	+	1.93283	0.0140851
NOL9-201	NOL9	ENST00000377705.5_1	chr1:6581407-6614595	-	1.9211	0.0370502
RNF144A-201	RNF144A	ENST00000320892.10_1	chr2:7057523-7184313	+	1.91872	0.011705
UBR7-201	UBR7	ENST00000013070.10_1	chr14:93673401-93695561	+	1.91748	0.00623782
TXNL4B-201	TXNL4B	ENST00000268483.7_1	chr16:72118752-72127550	-	1.91278	0.00636738
DAAM1-202	DAAM1	ENST00000395125.1_1	chr14:59730173-59838123	+	1.90885	0.0454957
MFN1-205	MFN1	ENST00000471841.5_1	chr3:179065480-179112719	+	1.90319	0.00801927
PLCXD1-201	PLCXD1	ENST00000381657.7_4	chrX:197859-220023	+	1.90131	0.00954283
B3GAT3-202	B3GAT3	ENST00000531383.5_1	chr11:62382769-62389626	-	1.89058	0.0128362
ZNF219-201	ZNF219	ENST00000360947.7_1	chr14:21558205-21566799	-	1.88619	0.0254851
TPCN1-214	TPCN1	ENST00000550785.5_1	chr12:113659265-113736390	+	1.88102	0.0412458
GPN2-202	GPN2	ENST00000374135.8_1	chr1:27202624-27216788	-	1.87876	0.0283749
C19orf12-208	C19orf12	ENST00000614091.4_1	chr19:30189793-30206696	-	1.8742	1.57636e-05
WDR5B-201	WDR5B	ENST00000330689.5_1	chr3:122131179-122134898	-	1.86197	0.000151644
CARMIL1-201	CARMIL1	ENST00000329474.6_1	chr6:25279656-25620758	+	1.85891	0.00892862
MAPKAPK5-206	MAPKAPK5	ENST00000550735.6_1	chr12:112279782-112340042	+	1.85432	0.0223959
BTG1-201	BTG1	ENST00000256015.4_1	chr12:92534054-92539673	-	1.85307	0.037362
SIAH1-202	SIAH1	ENST00000380006.2_1	chr16:48394442-48397793	-	1.8349	0.0359802
SLC25A12-202	SLC25A12	ENST00000422440.6_1	chr2:172640880-172750762	-	1.82454	0.00275905
KCNQ5-201	KCNQ5	ENST00000342056.6_1	chr6:73331520-73908571	+	1.82023	0.00161829
PDRG1-201	PDRG1	ENST00000202017.5_1	chr20:30532145-30539895	-	1.81847	0.00650929
MBNL2-202	MBNL2	ENST00000345429.10_1	chr13:97874609-98046374	+	1.80922	0.000317186
PRDM4-201	PRDM4	ENST00000228437.9_1	chr12:108126643-108154937	-	1.80467	0.0391795
ANKRD49-208	ANKRD49	ENST00000544253.1_1	chr11:94227174-94232743	+	1.8001	2.92761e-05
NR3C1-203	NR3C1	ENST00000394464.6_1	chr5:142657496-142783265	-	1.79583	0.0159736
KLHL14-202	KLHL14	ENST00000359358.8_1	chr18:30252634-30353025	-	1.79388	0.0127088
CSGALNACT1-203	CSGALNACT1	ENST00000454498.6_1	chr8:19261672-19460006	-	1.78512	0.00310801
LARP4B-211	LARP4B	ENST00000612396.4_1	chr10:852854-977645	-	1.77621	0.0175605
ARPIN-201	ARPIN	ENST00000357484.9_1	chr15:90438238-90456188	-	1.76235	0.0230715
TSPAN14-207	TSPAN14	ENST00000429989.7_1	chr10:82213922-82292879	+	1.76112	0.0377874
RPUSD4-201	RPUSD4	ENST00000298317.8_1	chr11:126071989-126081587	-	1.74529	0.00250574
MFSD14C-208	MFSD14C	ENST00000637864.1_1	chr9:99705195-99775882	-	1.73169	0.0378381
VPS54-203	VPS54	ENST00000409558.8_1	chr2:64119280-64246206	-	1.72886	0.0314106
ZNF780A-203	ZNF780A	ENST00000450241.6_1	chr19:40575059-40596795	-	1.7277	0.0395622
TNRC6B-206	TNRC6B	ENST00000454349.6_2	chr22:40573929-40731811	+	1.71329	0.00466606
MAGEH1-201	MAGEH1	ENST00000342972.2_1	chrX:55478538-55479999	+	1.68548	0.0161737
CNOT11-201	CNOT11	ENST00000289382.7_1	chr2:101869264-101886778	+	1.68335	0.00566901
TRIM62-201	TRIM62	ENST00000291416.9_1	chr1:33611003-33647267	-	1.67958	0.0280696
C12orf45-204	C12orf45	ENST00000552951.6_2	chr12:105380088-105411402	+	1.66615	0.0409307
CTBS-202	CTBS	ENST00000370630.5_1	chr1:85015289-85040147	-	1.66275	0.0020423
SLC12A4-201	SLC12A4	ENST00000316341.7_1	chr16:67977377-68002597	-	1.65862	0.0172525
STON1-202	STON1	ENST00000406226.1_1	chr2:48757325-48825652	+	1.65232	0.00332135
NLN-201	NLN	ENST00000380985.9_1	chr5:65018023-65125111	+	1.65032	0.0392588
FANCF-201	FANCF	ENST00000327470.4_1	chr11:22644065-22648333	-	1.6475	0.0485931
PDPR-201	PDPR	ENST00000288050.8_1	chr16:70147529-70196440	+	1.64619	0.0288681
SPC24-206	SPC24	ENST00000592540.5_1	chr19:11256170-11266484	-	1.642	0.0123573
PHF6-201	PHF6	ENST00000332070.7_1	chrX:133507342-133562819	+	1.64151	0.010386
MS4A1-203	MS4A1	ENST00000524807.5_1	chr11:60223225-60229869	+	1.64121	0.0124164
ZNF841-203	ZNF841	ENST00000594295.5_1	chr19:52567719-52597358	-	1.63789	0.0115372
GPATCH11-202	GPATCH11	ENST00000409774.5_1	chr2:37311594-37326387	+	1.62526	0.0287612
TTYH2-202	TTYH2	ENST00000441391.6_1	chr17:72244097-72258155	+	1.61341	0.00337835
ZNF619-204	ZNF619	ENST00000447116.6_1	chr3:40518604-40531727	+	1.61022	0.00852489
CEBPZOS-204	CEBPZOS	ENST00000402297.5_2	chr2:37423631-37431884	+	1.60521	0.00373624
CEP68-202	CEP68	ENST00000377990.6_2	chr2:65283506-65314138	+	1.59871	0.0164379
SMG8-203	SMG8	ENST00000578922.1_1	chr17:57287228-57289405	+	1.59363	0.00441955
GANC-201	GANC	ENST00000318010.12_1	chr15:42566440-42649133	+	1.57698	0.0286392
RP11-231C14.4-001	RP11-231C14.4	ENST00000550665.1	chr16:29496011-29517141	-	1.57509	0.0279341
GOLGA8H-201	GOLGA8H	ENST00000566740.1_1	chr15:30896329-30906764	+	1.55999	0.038681
ARHGEF9-233	ARHGEF9	ENST00000637520.1_2	chrX:62854895-62975004	-	1.54969	0.0257524
NFX1-201	NFX1	ENST00000318524.6_1	chr9:33290543-33348721	+	1.54644	0.000499718
FAM204A-203	FAM204A	ENST00000369183.8_1	chr10:120057442-120101832	-	1.53721	0.04895
ARL14EP-202	ARL14EP	ENST00000530909.1_1	chr11:30349583-30354490	+	1.52711	0.0180066
GFOD1-203	GFOD1	ENST00000379287.3_1	chr6:13358062-13487787	-	1.52246	0.0115406
RAB44-202	RAB44	ENST00000612677.4_1	chr6:36665628-36700960	+	1.51138	0.000536824
TUBB1-201	TUBB1	ENST00000217133.1_1	chr20:57594309-57601709	+	0.469887	0.0445724
DHRS7B-202	DHRS7B	ENST00000395511.7_2	chr17:21029965-21095343	+	0.458524	0.0363748
FANCL-202	FANCL	ENST00000402135.7_1	chr2:58386382-58468485	-	0.414076	0.000877527
SENP6-205	SENP6	ENST00000447266.6_1	chr6:76311763-76427994	+	0.398391	0.02118
C6orf106-202	C6orf106	ENST00000374023.7_3	chr6:34555065-34664624	-	0.386461	0.0188997
INHBA-201	INHBA	ENST00000242208.4_1	chr7:41724712-41742706	-	0.331021	0.0160014
SNX9-201	SNX9	ENST00000392185.7_2	chr6:158244296-158366109	+	0.317576	0.0373506
FSCN1-201	FSCN1	ENST00000382361.7_1	chr7:5632454-5646286	+	0.296361	0.0194541
NT5E-203	NT5E	ENST00000369651.7_1	chr6:86159302-86205509	+	0.231049	0.00341272
RPL7-201	RPL7	ENST00000352983.6_1	chr8:74202874-74206133	-	0.224731	0.0130344
HEATR3-201	HEATR3	ENST00000299192.7_1	chr16:50099852-50140298	+	0.202815	0.0216799
RPS10-201	RPS10	ENST00000326199.12_1	chr6:34385231-34393902	-	0.199194	0.0486357
NT5C3A-202	NT5C3A	ENST00000381626.6_1	chr7:33053726-33080777	-	0.18159	0.0486766
FAM46C-201	FAM46C	ENST00000369448.3_1	chr1:118148556-118170994	+	0.176439	0.022321
MMP10-201	MMP10	ENST00000279441.8_1	chr11:102641234-102651359	-	0.175096	0.00805463
PFN1-201	PFN1	ENST00000225655.5_1	chr17:4848947-4852309	-	0.171086	0.00372196
FN1-203	FN1	ENST00000354785.8_3	chr2:216225177-216300895	-	0.169211	0.00439306
RPL27A-201	RPL27A	ENST00000314138.10_1	chr11:8703958-8711419	+	0.165133	0.0344399
TMBIM6-203	TMBIM6	ENST00000423828.5_1	chr12:50135592-50158717	+	0.162214	0.0205783
PNKD-203	PNKD	ENST00000273077.8_1	chr2:219135208-219211516	+	0.158505	0.011583
PCGF5-204	PCGF5	ENST00000543648.5_1	chr10:92979908-93044086	+	0.141306	0.00591315
YPEL5-203	YPEL5	ENST00000379520.7_1	chr2:30369807-30383399	+	0.138663	0.0109429
MTURN-201	MTURN	ENST00000324453.12_3	chr7:30174426-30202378	+	0.125397	0.0225511
RPS3-217	RPS3	ENST00000531188.5_1	chr11:75110530-75117957	+	0.121954	0.0189467
RPLP1-201	RPLP1	ENST00000260379.10_1	chr15:69745123-69748533	+	0.114838	0.0322598
CAP1-203	CAP1	ENST00000372797.7_2	chr1:40505905-40538321	+	0.109485	0.00111445
DPYSL2-204	DPYSL2	ENST00000521913.6_4	chr8:26371538-26515689	+	0.103573	0.00322753
BRD2-201	BRD2	ENST00000374825.8_1	chr6:32936437-32949282	+	0.103428	0.0300129
RSU1-203	RSU1	ENST00000377921.7_1	chr10:16632610-16859382	-	0.0977434	0.0374609
GRK5-202	GRK5	ENST00000392870.2_1	chr10:120967101-121215131	+	0.0856974	0.0104191
EIF4G2-208	EIF4G2	ENST00000526148.5_2	chr11:10818597-10829520	-	0.069076	0.0157259
FAU-202	FAU	ENST00000434372.2_1	chr11:64888755-64889649	-	0.0628442	0.0327425
HNRNPA2B1-201	HNRNPA2B1	ENST00000354667.8_3	chr7:26229547-26240366	-	0.0556945	0.0342576
RPS11-203	RPS11	ENST00000596873.1_1	chr19:49999689-50001508	+	0.0411048	0.0117845
YWHAZ-206	YWHAZ	ENST00000395957.6_3	chr8:101928753-101965211	-	0.0334889	0.0286374
ITGB1-202	ITGB1	ENST00000396033.6_1	chr10:33189247-33246822	-	0.024848	0.00809162
ACTB-201	ACTB	ENST00000331789.9_1	chr7:5566782-5570340	-	0.022834	0.0148872
FERMT3-201	FERMT3	ENST00000279227.9_2	chr11:63974206-63991354	+	0.018612	0.00627905
CCND3-215	CCND3	ENST00000511642.5_1	chr6:41902672-42018095	-	0.0180857	0.0194315
HNRNPK-204	HNRNPK	ENST00000376263.7_1	chr9:86582999-86595184	-	0.0159369	0.00731946

## Sheet: Type 1 vs Type 3
Supplementary Table S2 List of differentially expressed mRNAs between different HSPN types
Trans_Name	Gene name	Track_id	Locus	Strand	Fold change	p_value
KIF2A-202	KIF2A	ENST00000401507.7_1	chr5:61601989-61681503	+	81.2658	0.000271175
SAT1-201	SAT1	ENST00000379251.7_1	chrX:23801290-23802330	+	76.2834	0.0238856
RPS17-201	RPS17	ENST00000330244.10_1	chr15:83205504-83209315	-	62.2836	5.4961e-06
FTH1-207	FTH1	ENST00000532601.1_1	chr11:61732073-61734638	-	41.6918	0.0176865
ZYX-207	ZYX	ENST00000457235.5_3	chr7:143078454-143079769	+	40.4853	0.0386075
NCOA2-205	NCOA2	ENST00000520416.1_1	chr8:71128956-71314822	-	34.5182	0.000641678
ARHGEF1-201	ARHGEF1	ENST00000337665.8_1	chr19:42388515-42411606	+	26.5776	0.00401497
RARA-206	RARA	ENST00000425707.7_1	chr17:38474537-38513895	+	26.4995	0.000726315
ACTG1-216	ACTG1	ENST00000615544.4_1	chr17:79476999-79479781	-	22.0195	0.0340087
MBNL1-221	MBNL1	ENST00000495875.6_1	chr3:151986709-152150706	+	21.6861	0.0245312
MRPL20-203	MRPL20	ENST00000482352.1_1	chr1:1340489-1342670	-	21.4611	0.00126275
ARHGAP25-203	ARHGAP25	ENST00000409220.5_1	chr2:69001933-69053965	+	21.236	0.0091331
NEDD8-201	NEDD8	ENST00000250495.9_1	chr14:24686058-24701660	-	21.1209	0.0205255
MFSD1-219	MFSD1	ENST00000622669.4_2	chr3:158519715-158547507	+	18.4994	0.00319754
TYROBP-209	TYROBP	ENST00000589517.1_1	chr19:36395462-36399197	-	18.0751	0.00840744
GLUL-203	GLUL	ENST00000339526.8_1	chr1:182352029-182360927	-	17.538	0.0232256
CD74-206	CD74	ENST00000518797.5_2	chr5:149781262-149792295	-	17.1894	0.00190307
PABPC1-219	PABPC1	ENST00000522387.5_1	chr8:101715389-101734220	-	17.142	0.00756363
AHNAK-208	AHNAK	ENST00000533365.5_4	chr11:62259283-62313159	-	16.8276	0.00646669
FRAT1-201	FRAT1	ENST00000371021.4_1	chr10:99079024-99081672	+	16.7041	0.0218323
HLA-DRB5-201	HLA-DRB5	ENST00000374975.3_1	chr6:32485120-32498064	-	16.3468	0.0169186
FLII-216	FLII	ENST00000577398.6_1	chr17:18148150-18149376	-	16.2679	0.00861845
STK17B-204	STK17B	ENST00000449152.1_1	chr2:197028088-197035724	-	15.8032	0.0272727
NDUFA10-208	NDUFA10	ENST00000444548.5_1	chr2:240908869-240951093	-	15.5736	0.00451501
ANKRD13D-216	ANKRD13D	ENST00000514166.5_1	chr11:67056873-67069956	+	14.9453	0.0159288
PTPRC-206	PTPRC	ENST00000413409.6_1	chr1:198608227-198664300	+	14.9294	0.0171907
MAD1L1-208	MAD1L1	ENST00000437877.1_2	chr7:1937836-1980185	-	14.6746	0.0117031
KLF2-202	KLF2	ENST00000592003.1_1	chr19:16435651-16438071	+	14.6598	0.016271
COX5B-201	COX5B	ENST00000258424.2_1	chr2:98262503-98264846	+	13.9193	0.0480917
CNN2-205	CNN2	ENST00000562958.6_1	chr19:1026628-1039067	+	13.8859	0.00261593
PABPN1-201	PABPN1	ENST00000216727.8_1	chr14:23790498-23795394	+	13.7797	0.00822221
ITGAL-201	ITGAL	ENST00000356798.10_1	chr16:30483979-30534506	+	13.7268	0.010015
SNAI3-201	SNAI3	ENST00000332281.5_1	chr16:88744090-88752901	-	13.6946	0.00564823
SPAG7-201	SPAG7	ENST00000206020.7_1	chr17:4862523-4871167	-	13.4512	0.002165
STAT6-217	STAT6	ENST00000555375.5_3	chr12:57493202-57496773	-	13.1886	0.0321818
DGKZ-202	DGKZ	ENST00000343674.10_1	chr11:46354455-46402104	+	13.1041	0.0258797
RNF31-201	RNF31	ENST00000324103.10_1	chr14:24616588-24629870	+	12.8348	0.0130116
ITGA4-203	ITGA4	ENST00000397033.6_1	chr2:182321952-182400914	+	12.7244	0.00617972
HNRNPA2B1-202	HNRNPA2B1	ENST00000356674.7_3	chr7:26231464-26240366	-	12.6385	0.027441
PIP4K2A-206	PIP4K2A	ENST00000545335.5_2	chr10:22825944-23003037	-	12.6234	0.0201812
HIST1H2BD-201	HIST1H2BD	ENST00000289316.2_1	chr6:26158374-26171577	+	12.6144	0.00522362
UIMC1-207	UIMC1	ENST00000506128.5_2	chr5:176332051-176433582	-	12.3928	0.0208848
HIGD1A-201	HIGD1A	ENST00000321331.11_1	chr3:42825790-42846023	-	12.3564	0.0008459
CHIC2-201	CHIC2	ENST00000263921.7_3	chr4:54875956-54930857	-	12.3219	0.034745
SPON2-222	SPON2	ENST00000617421.4_1	chr4:1160725-1202750	-	11.9446	0.0164336
BCL2L1-203	BCL2L1	ENST00000376062.6_1	chr20:30252255-30310400	-	11.9435	0.030727
CSRNP1-201	CSRNP1	ENST00000273153.9_1	chr3:39183346-39195066	-	11.9057	0.0297319
GRAPL-204	GRAPL	ENST00000577213.1_1	chr17:19030848-19042383	+	11.8683	0.00628637
MYL12B-203	MYL12B	ENST00000581193.5_1	chr18:3262415-3278282	+	11.7013	0.0332851
SENP6-202	SENP6	ENST00000370010.6_1	chr6:76311225-76425620	+	11.6566	0.00396358
FOS-206	FOS	ENST00000555347.1_1	chr14:75746896-75748290	+	11.5388	0.0497697
OAS2-203	OAS2	ENST00000449768.2_1	chr12:113416287-113426610	+	11.477	0.0365135
U2AF1L5-204	U2AF1L5	ENST00000623375.3_2	chr21:44513066-44525362	-	11.2579	0.000895124
GIMAP6-201	GIMAP6	ENST00000328902.9_1	chr7:150322463-150329473	-	10.7898	0.000387938
PARVG-204	PARVG	ENST00000417767.1_3	chr22:44577278-44579299	+	10.5204	0.00027494
HMGB2-202	HMGB2	ENST00000438704.6_1	chr4:174252852-174254823	-	10.351	0.0433818
PAN3-201	PAN3	ENST00000380958.7_1	chr13:28712643-28866676	+	10.3298	0.000635496
RGL2-237	RGL2	ENST00000425946.1_1	chr6:33264221-33266587	-	10.1595	0.0220167
MYO18A-216	MYO18A	ENST00000533420.3_3	chr17:27448943-27467401	-	10.0562	0.0482383
SMAP2-201	SMAP2	ENST00000372708.5_1	chr1:40840320-40888998	+	10.0373	0.00913832
CALM2-201	CALM2	ENST00000272298.11_1	chr2:47387221-47403740	-	9.97431	0.0300924
CD22-234	CD22	ENST00000613136.1_1	chr19:35826956-35827564	+	9.77177	0.0261989
ZNF787-203	ZNF787	ENST00000610935.1_1	chr19:56598732-56632649	-	9.69526	0.029695
RABL6-201	RABL6	ENST00000311502.11_2	chr9:139702413-139735639	+	9.63563	0.00450105
C15orf39-205	C15orf39	ENST00000564848.1_1	chr15:75494546-75498470	+	9.59867	0.00846251
PELI1-201	PELI1	ENST00000358912.4_1	chr2:64319786-64371588	-	9.54691	0.0395025
CLEC17A-203	CLEC17A	ENST00000547437.5_1	chr19:14693896-14721969	+	9.50158	0.0195518
YPEL5-205	YPEL5	ENST00000402708.5_1	chr2:30370382-30382417	+	9.43014	0.03751
DOK3-201	DOK3	ENST00000312943.10_1	chr5:176928908-176937386	-	9.41464	0.00109833
ZNF805-201	ZNF805	ENST00000354309.4_1	chr19:57752053-57766503	+	9.41439	0.0120648
TPD52L2-201	TPD52L2	ENST00000217121.9_1	chr20:62496647-62522898	+	9.37491	0.0110372
CAPN15-208	CAPN15	ENST00000637507.1_1	chr16:590105-598031	+	9.36391	0.000537709
SDHB-201	SDHB	ENST00000375499.7_1	chr1:17345217-17380665	-	9.31849	0.0259202
USP4-203	USP4	ENST00000415188.1_1	chr3:49354165-49377469	-	9.23671	0.0406714
ZBTB12-201	ZBTB12	ENST00000375527.2_1	chr6:31867384-31869769	-	9.148	2.19179e-08
RRBP1-205	RRBP1	ENST00000398782.2_3	chr20:17640251-17662940	-	9.14256	0.026311
ADAMTSL4-203	ADAMTSL4	ENST00000369039.9_3	chr1:150521845-150533408	+	9.05376	0.00683547
AP2A1-201	AP2A1	ENST00000354293.9_1	chr19:50270225-50310369	+	9.02065	0.0325652
PTTG1IP-201	PTTG1IP	ENST00000330938.7_1	chr21:46269500-46293752	-	8.9145	0.00366778
SH2B2-202	SH2B2	ENST00000536178.3_1	chr7:101928446-101962178	+	8.8973	0.0249625
ZNF622-201	ZNF622	ENST00000308683.2_1	chr5:16451628-16465901	-	8.80608	0.0118012
GRK6-201	GRK6	ENST00000355472.9_1	chr5:176853679-176869831	+	8.69203	0.000280824
STK17A-201	STK17A	ENST00000319357.5_1	chr7:43622664-43666385	+	8.53658	0.0204895
ARHGEF40-201	ARHGEF40	ENST00000298694.8_1	chr14:21538429-21558399	+	8.53598	0.000407735
NXT1-201	NXT1	ENST00000254998.2_1	chr20:23331373-23335414	+	8.50318	0.0441342
DNAJC4-202	DNAJC4	ENST00000321685.7_1	chr11:63997750-64001753	+	8.46938	0.0177927
MFSD1-201	MFSD1	ENST00000264266.12_2	chr3:158519880-158546905	+	8.37349	0.00276327
RBM3-202	RBM3	ENST00000376755.1_1	chrX:48433340-48436256	+	8.36587	0.000988316
SPOPL-201	SPOPL	ENST00000280098.8_1	chr2:139259371-139331117	+	8.31108	0.0181185
VAMP7-202	VAMP7	ENST00000286448.11_1	chrX:155110956-155173433	+	8.27158	0.013632
ZFYVE27-206	ZFYVE27	ENST00000393677.8_2	chr10:99496880-99520664	+	8.26406	0.0144046
TRAPPC12-201	TRAPPC12	ENST00000324266.9_1	chr2:3383457-3483337	+	8.26354	0.00162834
CD300E-201	CD300E	ENST00000392619.1_3	chr17:72606026-72619877	-	8.25408	0.0436733
SMPD2-201	SMPD2	ENST00000258052.7_1	chr6:109761966-109765122	+	8.23501	0.00647334
MZT1-201	MZT1	ENST00000377818.3_1	chr13:73282495-73301825	-	8.1721	0.0195968
PRKACB-204	PRKACB	ENST00000370685.7_1	chr1:84609954-84704181	+	8.15155	0.0329276
PLP2-202	PLP2	ENST00000376327.5_1	chrX:49028273-49031588	+	8.14939	0.00984823
FGR-203	FGR	ENST00000374005.7_1	chr1:27938575-27961788	-	8.11546	0.0248475
EDF1-203	EDF1	ENST00000371649.5_1	chr9:139756571-139760737	-	8.1079	0.0120296
IFI16-209	IFI16	ENST00000474473.1_1	chr1:158985463-158990319	+	8.06514	0.0237106
SOCS1-201	SOCS1	ENST00000332029.2_1	chr16:11348262-11350036	-	8.01378	0.0155989
POLRMT-202	POLRMT	ENST00000588649.6_1	chr19:617224-633604	-	8.00365	0.0196251
DEDD2-204	DEDD2	ENST00000595337.5_1	chr19:42702765-42724275	-	7.95002	0.013511
FAM32A-205	FAM32A	ENST00000589852.5_1	chr19:16296191-16302425	+	7.94834	0.0450886
DMWD-208	DMWD	ENST00000602829.1_1	chr19:46288514-46289168	-	7.89519	0.0301343
SCARF1-201	SCARF1	ENST00000263071.8_1	chr17:1537152-1549041	-	7.87424	0.00763277
MEX3C-203	MEX3C	ENST00000592416.1_1	chr18:48719280-48723129	-	7.86956	0.0156605
USP19-208	USP19	ENST00000453664.5_1	chr3:49145564-49158371	-	7.81821	0.0278258
RAB6A-202	RAB6A	ENST00000336083.7_1	chr11:73386941-73472136	-	7.80783	0.0210463
HNRNPLL-209	HNRNPLL	ENST00000449105.7_2	chr2:38789120-38830108	-	7.80042	0.00380444
GALNS-213	GALNS	ENST00000569433.1_1	chr16:88922161-88923339	-	7.79492	0.00729352
SCIMP-203	SCIMP	ENST00000574081.5_3	chr17:5112256-5138155	-	7.73058	0.0172717
FLI1-205	FLI1	ENST00000527786.6_1	chr11:128563665-128683162	+	7.70944	0.03796
VPS28-204	VPS28	ENST00000526054.5_1	chr8:145649000-145652366	-	7.6955	0.0142749
HSH2D-208	HSH2D	ENST00000616645.4_1	chr19:16244838-16269381	+	7.65722	0.00763937
RANBP1-203	RANBP1	ENST00000411892.5_3	chr22:20105080-20113011	+	7.63869	0.0225367
ZNF282-204	ZNF282	ENST00000610704.4_1	chr7:148892577-148923339	+	7.61502	0.00175144
SNX20-201	SNX20	ENST00000300590.7_1	chr16:50700211-50715264	-	7.58379	0.0126303
FBRSL1-205	FBRSL1	ENST00000542061.2_2	chr12:133083616-133088538	+	7.58326	0.0173738
ALOX5-201	ALOX5	ENST00000374391.6_1	chr10:45869675-45941563	+	7.5496	0.0196623
EPS15L1-202	EPS15L1	ENST00000455140.6_2	chr19:16466050-16582823	-	7.54292	0.00547031
ACIN1-201	ACIN1	ENST00000262710.5_1	chr14:23527776-23564823	-	7.48224	0.0401137
TAOK2-202	TAOK2	ENST00000308893.8_1	chr16:29984962-29999719	+	7.482	0.0468113
NXF1-211	NXF1	ENST00000531709.6_1	chr11:62559595-62572942	-	7.4675	0.0236413
SERPINB9-201	SERPINB9	ENST00000380698.4_1	chr6:2887500-2903514	-	7.43439	0.0471844
TRAPPC9-201	TRAPPC9	ENST00000389328.8_1	chr8:140742586-141468678	-	7.3499	0.00848528
MAN2A1-201	MAN2A1	ENST00000261483.4_1	chr5:109025067-109202879	+	7.34204	0.0496515
TREML2-201	TREML2	ENST00000483722.1_1	chr6:41158015-41168932	-	7.29288	0.0200563
IFNAR2-205	IFNAR2	ENST00000404220.7_1	chr21:34602276-34637980	+	7.26486	0.0280834
STX10-208	STX10	ENST00000591197.1_1	chr19:13256117-13261197	-	7.21935	0.0397899
DCAF10-202	DCAF10	ENST00000377724.7_1	chr9:37800499-37863322	+	7.21894	0.0279969
SAFB2-201	SAFB2	ENST00000252542.8_1	chr19:5587010-5622991	-	7.21212	0.0245616
TMEM91-209	TMEM91	ENST00000539627.5_1	chr19:41856816-41889988	+	7.19477	0.038195
ACTN1-209	ACTN1	ENST00000553659.1_1	chr14:69392276-69444986	-	7.14328	0.000498173
WAC-202	WAC	ENST00000347934.8_2	chr10:28822242-28909472	+	7.13616	0.0212579
SRSF1-205	SRSF1	ENST00000582730.6_1	chr17:56080721-56084622	-	7.10279	0.042174
TGFBI-201	TGFBI	ENST00000442011.6_1	chr5:135364584-135399506	+	7.08214	0.00557352
APLP2-202	APLP2	ENST00000278756.7_1	chr11:129940463-130014699	+	7.02133	0.0126556
VEGFB-201	VEGFB	ENST00000309422.6_2	chr11:64002010-64006265	+	7.01396	0.023946
TAF1-204	TAF1	ENST00000423759.5_1	chrX:70586089-70685854	+	6.9804	0.0222596
MBNL1-209	MBNL1	ENST00000460591.5_1	chr3:151987238-152163263	+	6.95832	0.0237607
SMARCA2-209	SMARCA2	ENST00000382203.5_1	chr9:2021945-2193624	+	6.94227	0.0259724
CKAP4-201	CKAP4	ENST00000378026.4_3	chr12:106631655-106641766	-	6.91711	0.0322346
CCND3-202	CCND3	ENST00000372988.8_1	chr6:41902694-42016706	-	6.88125	0.0423621
SRA1-201	SRA1	ENST00000336283.7_2	chr5:139929653-139937837	-	6.86933	0.00973566
TMEM131L-203	TMEM131L	ENST00000409959.7_1	chr4:154387501-154557863	+	6.86088	0.0187193
ABT1-201	ABT1	ENST00000274849.2_1	chr6:26597180-26600972	+	6.83896	0.0195147
SF1-203	SF1	ENST00000377387.5_1	chr11:64532078-64545941	-	6.78979	0.0289328
CREBZF-204	CREBZF	ENST00000527447.1_1	chr11:85372110-85376146	-	6.77978	0.00671669
VMP1-201	VMP1	ENST00000262291.8_1	chr17:57784826-57918453	+	6.71366	0.0187462
TP53INP2-202	TP53INP2	ENST00000374810.7_1	chr20:33292094-33301243	+	6.69739	0.000460517
EIF4ENIF1-206	EIF4ENIF1	ENST00000397525.5_2	chr22:31835353-31885573	-	6.67693	0.00582775
MYADM-202	MYADM	ENST00000391768.2_1	chr19:54372693-54377873	+	6.65813	0.0111295
PLIN3-201	PLIN3	ENST00000221957.8_1	chr19:4838353-4867780	-	6.65239	0.0177703
DUS1L-202	DUS1L	ENST00000354321.11_1	chr17:80015748-80023421	-	6.64914	0.00129059
ADAM19-201	ADAM19	ENST00000257527.8_2	chr5:156904312-157002783	-	6.6486	0.0323227
AKT1S1-205	AKT1S1	ENST00000391833.5_1	chr19:50372295-50378542	-	6.64133	0.00323012
NPIPB5-017	NPIPB5	ENST00000543407.1	chr16:22516172-22538951	+	6.60253	0.0497768
OPTN-203	OPTN	ENST00000378748.7_1	chr10:13142173-13180291	+	6.56916	0.0428925
CD6-201	CD6	ENST00000313421.11_1	chr11:60739152-60787849	+	6.55625	0.0217716
BAK1-203	BAK1	ENST00000442998.6_1	chr6:33540324-33548070	-	6.55585	0.0456778
DGKQ-201	DGKQ	ENST00000273814.7_1	chr4:952675-967344	-	6.54727	0.00121407
EMD-202	EMD	ENST00000369842.8_1	chrX:153607557-153609883	+	6.50584	0.00491691
PLXNB2-207	PLXNB2	ENST00000449103.5_1	chr22:50713408-50746056	-	6.49823	0.0207046
CD81-201	CD81	ENST00000263645.9_1	chr11:2398524-2418649	+	6.48411	0.000999468
GMFG-207	GMFG	ENST00000598034.5_2	chr19:39818999-39826646	-	6.46259	0.0242657
CPSF1-212	CPSF1	ENST00000616140.1_1	chr8:145618446-145634733	-	6.44888	0.0011603
UBR2-202	UBR2	ENST00000372901.1_1	chr6:42531800-42661242	+	6.43703	0.0256221
NTNG2-202	NTNG2	ENST00000393229.3_1	chr9:135037334-135119921	+	6.42825	0.0462886
SNX20-202	SNX20	ENST00000330943.8_1	chr16:50705536-50715263	-	6.4232	0.0108441
ETFA-203	ETFA	ENST00000557943.5_1	chr15:76507696-76603810	-	6.40521	0.0337771
CHST7-201	CHST7	ENST00000276055.3_1	chrX:46433219-46457843	+	6.39226	0.0211131
MEST-201	MEST	ENST00000223215.8_1	chr7:130131934-130146133	+	6.3553	0.00340198
NUP210-201	NUP210	ENST00000254508.6_1	chr3:13357735-13461809	-	6.34566	0.0367809
RBM10-203	RBM10	ENST00000377604.7_1	chrX:47004268-47046210	+	6.34564	0.0467454
RNASEH2C-201	RNASEH2C	ENST00000308418.8_1	chr11:65485144-65488418	-	6.33833	0.0140611
SP110-201	SP110	ENST00000258381.10_2	chr2:231033634-231084665	-	6.3279	0.0260517
B4GALT1-201	B4GALT1	ENST00000379731.4_1	chr9:33110635-33167354	-	6.32085	0.0122788
SPG11-201	SPG11	ENST00000261866.11_1	chr15:44854894-44955862	-	6.30847	0.0304501
TMEM55A-201	TMEM55A	ENST00000285419.7_2	chr8:92006024-92053292	-	6.30541	0.0202589
APLNR-202	APLNR	ENST00000606794.1_1	chr11:57001067-57004675	-	6.29526	0.0047864
UXS1-201	UXS1	ENST00000283148.11_1	chr2:106709759-106810795	-	6.22907	0.0155842
GUCD1-213	GUCD1	ENST00000621833.4_1	chr22:24936391-24951903	-	6.21061	0.00317857
SART1-201	SART1	ENST00000312397.9_1	chr11:65729160-65747299	+	6.20875	0.028631
ARHGAP45-206	ARHGAP45	ENST00000586866.5_2	chr19:1067497-1086627	+	6.17829	0.00382035
UBAP2-204	UBAP2	ENST00000379238.5_1	chr9:33921691-34048899	-	6.17533	0.0276635
ST6GAL1-201	ST6GAL1	ENST00000169298.7_1	chr3:186648274-186796341	+	6.16968	0.0269914
MAP1LC3B-201	MAP1LC3B	ENST00000268607.9_1	chr16:87425406-87438385	+	6.16445	0.0420386
COASY-201	COASY	ENST00000393818.2_2	chr17:40714185-40718293	+	6.14912	0.00664123
PRKAR1A-221	PRKAR1A	ENST00000592800.5_2	chr17:66521936-66526795	+	6.14146	0.0127843
AC022532.1-201	AC022532.1	ENST00000420338.2	chr10:72194585-72196314	+	6.1362	0.0122973
CROCC-201	CROCC	ENST00000375541.9_1	chr1:17248445-17299474	+	6.11937	0.0230949
WDR11-201	WDR11	ENST00000263461.10_1	chr10:122610687-122669036	+	6.11717	0.00246992
RGCC-201	RGCC	ENST00000379359.3_1	chr13:42031695-42045018	+	6.08136	0.00516116
DNM3-208	DNM3	ENST00000627582.2_1	chr1:171810640-172381857	+	6.06079	9.67499e-05
ZFP36L1-204	ZFP36L1	ENST00000555997.1_1	chr14:69254377-69257960	-	5.98245	0.0137341
DGAT2-201	DGAT2	ENST00000228027.11_3	chr11:75479777-75512579	+	5.97213	0.0184811
SPTLC2-201	SPTLC2	ENST00000216484.6_1	chr14:77972340-78083116	-	5.90893	0.00712695
CCDC12-202	CCDC12	ENST00000425441.5_1	chr3:46963216-47023472	-	5.85321	0.0192848
ARID1B-202	ARID1B	ENST00000346085.9_2	chr6:157098508-157531913	+	5.83623	0.0116462
HNRNPR-210	HNRNPR	ENST00000478691.5_1	chr1:23631181-23670829	-	5.83097	0.0057488
TNKS-213	TNKS	ENST00000522110.1_1	chr8:9413442-9416341	+	5.82338	0.00273837
TC2N-203	TC2N	ENST00000435962.6_1	chr14:92246095-92333873	-	5.81103	0.0417581
NUP88-207	NUP88	ENST00000573584.5_1	chr17:5289346-5323480	-	5.76906	0.000647285
SEPT9-202	SEPT9	ENST00000423034.6_1	chr17:75369272-75496676	+	5.76448	0.016484
MAPK8IP3-201	MAPK8IP3	ENST00000250894.8_2	chr16:1756184-1820318	+	5.74953	0.0115083
LTB4R-203	LTB4R	ENST00000396789.4_1	chr14:24782517-24787242	+	5.73533	0.0249832
VCAN-201	VCAN	ENST00000265077.7_1	chr5:82767284-82878122	+	5.72077	0.0121144
GAA-201	GAA	ENST00000302262.7_1	chr17:78075503-78093678	+	5.71602	0.0245558
FAM43A-201	FAM43A	ENST00000329759.5_1	chr3:194407273-194409766	+	5.70634	0.0128802
TAF3-201	TAF3	ENST00000344293.5_1	chr10:7860467-8058590	+	5.68552	0.00260537
KCNE3-201	KCNE3	ENST00000310128.8_2	chr11:74165886-74178673	-	5.68181	0.0492717
TNPO2-202	TNPO2	ENST00000425528.5_4	chr19:12810008-12834810	-	5.6803	0.00245943
MSL3-206	MSL3	ENST00000380693.7_1	chrX:11777671-11793870	+	5.66135	0.0245784
EXOC7-216	EXOC7	ENST00000589210.5_1	chr17:74077099-74099839	-	5.65284	0.0257794
SF3B6-201	SF3B6	ENST00000233468.4_1	chr2:24290454-24299313	-	5.63522	0.0468986
SLC25A43-201	SLC25A43	ENST00000217909.7_1	chrX:118533023-118588441	+	5.60302	0.00129415
CCDC7-215	CCDC7	ENST00000639629.1_2	chr10:32740571-33165321	+	5.6025	0.0119477
MGEA5-203	MGEA5	ENST00000370094.7_1	chr10:103556803-103578175	-	5.5931	0.0445992
TMCO3-202	TMCO3	ENST00000434316.6_1	chr13:114145310-114204510	+	5.56783	0.0109773
CTBP1-209	CTBP1	ENST00000510568.1_1	chr4:1228475-1235711	-	5.55331	0.0371079
SPPL2B-209	SPPL2B	ENST00000613503.4_1	chr19:2328629-2354804	+	5.53271	0.0178225
CD68-203	CD68	ENST00000584180.1_1	chr17:7483813-7484940	+	5.51312	0.0356263
DAB2-217	DAB2	ENST00000545653.5_1	chr5:39371777-39425335	-	5.50239	0.00633045
UBR5-207	UBR5	ENST00000520539.5_1	chr8:103265240-103425069	-	5.48064	0.0376486
YIPF2-201	YIPF2	ENST00000253031.6_1	chr19:11032861-11039357	-	5.46661	0.0242463
PCGF6-202	PCGF6	ENST00000369847.3_3	chr10:105062553-105110891	-	5.45585	0.0156663
PELI2-201	PELI2	ENST00000267460.8_1	chr14:56585093-56768244	+	5.43562	0.0231695
NAPB-207	NAPB	ENST00000617876.4_3	chr20:23355156-23402156	-	5.43364	0.0426472
PQLC1-203	PQLC1	ENST00000397778.6_1	chr18:77662420-77711664	-	5.41607	0.0192114
SLC38A10-202	SLC38A10	ENST00000374759.7_1	chr17:79218800-79269105	-	5.37512	0.0317514
GID8-201	GID8	ENST00000266069.4_1	chr20:61569471-61579827	+	5.37286	0.00199115
KAT2A-201	KAT2A	ENST00000225916.9_1	chr17:40265126-40273376	-	5.37155	0.0134856
ARHGEF2-206	ARHGEF2	ENST00000462460.6_1	chr1:155916646-155959864	-	5.36743	0.0299706
TGS1-201	TGS1	ENST00000260129.5_1	chr8:56685701-56738005	+	5.36723	0.0120377
TMED7-201	TMED7	ENST00000456936.3_1	chr5:114949205-114961870	-	5.35347	0.00418999
TINF2-202	TINF2	ENST00000399423.8_1	chr14:24708849-24711869	-	5.32282	0.029444
UBE2M-201	UBE2M	ENST00000253023.7_1	chr19:59067079-59070327	-	5.27254	0.00490369
SELENOO-201	SELENOO	ENST00000380903.6_1	chr22:50639408-50656045	+	5.26739	0.00745947
HMOX1-201	HMOX1	ENST00000216117.8_1	chr22:35776828-35790207	+	5.25663	0.0286579
ZNF141-201	ZNF141	ENST00000240499.7_1	chr4:331624-369047	+	5.24987	0.0407264
HNRNPC-205	HNRNPC	ENST00000553300.5_1	chr14:21679096-21737601	-	5.24909	0.00122271
LSM4-203	LSM4	ENST00000593829.5_1	chr19:18417040-18434084	-	5.23563	0.0446468
SLCO3A1-201	SLCO3A1	ENST00000318445.10_1	chr15:92396925-92709133	+	5.22986	0.0439491
TXNDC11-202	TXNDC11	ENST00000356957.7_1	chr16:11772939-11836694	-	5.19821	0.0173529
SRSF8-201	SRSF8	ENST00000587424.2_1	chr11:94800361-94804387	+	5.17595	0.041308
LSM6-201	LSM6	ENST00000296581.10_2	chr4:147096837-147112687	+	5.13582	0.0384914
OXSR1-201	OXSR1	ENST00000311806.7_1	chr3:38206996-38296979	+	5.13334	0.020341
PITPNC1-201	PITPNC1	ENST00000299954.13_1	chr17:65373397-65693377	+	5.12702	0.0224601
WDR81-202	WDR81	ENST00000409644.5_2	chr17:1628254-1641886	+	5.11073	0.0406782
ZBTB18-201	ZBTB18	ENST00000358704.4_1	chr1:244214585-244220778	+	5.10236	0.0175899
PYM1-203	PYM1	ENST00000408946.6_2	chr12:56295197-56321697	-	5.08634	0.017662
RPL31-203	RPL31	ENST00000409028.8_1	chr2:101618745-101636190	+	5.07732	0.0262279
TBC1D12-201	TBC1D12	ENST00000225235.4_1	chr10:96162261-96295687	+	5.06601	0.011661
TBC1D22A-203	TBC1D22A	ENST00000380995.5_1	chr22:47158514-47571342	+	5.05028	0.0272394
PPM1A-202	PPM1A	ENST00000325658.3_1	chr14:60716159-60755273	+	5.04341	0.0175676
ATP6V1D-201	ATP6V1D	ENST00000216442.11_1	chr14:67804788-67826966	-	5.01486	0.0126391
KAT8-206	KAT8	ENST00000543774.6_1	chr16:31127075-31142714	+	5.0031	0.0213861
POLD1-214	POLD1	ENST00000613923.4_2	chr19:50887580-50921275	+	4.99695	0.0190848
TMEM229B-201	TMEM229B	ENST00000357461.6_1	chr14:67936983-67982021	-	4.98806	0.00255621
FXR2-201	FXR2	ENST00000250113.11_1	chr17:7494548-7518185	-	4.98112	0.000709853
ZBED5-202	ZBED5	ENST00000432999.6_1	chr11:10874251-10879620	-	4.9257	0.00362875
MRPL51-201	MRPL51	ENST00000229238.4_1	chr12:6601052-6602764	-	4.9192	0.00887246
PARD6B-201	PARD6B	ENST00000371610.6_1	chr20:49348081-49370278	+	4.91781	0.0437338
FAM160B1-202	FAM160B1	ENST00000369248.8_1	chr10:116581503-116624476	+	4.89794	0.00392442
SOCS4-202	SOCS4	ENST00000395472.2_1	chr14:55493948-55516206	+	4.89498	0.00943823
SH3GL1-201	SH3GL1	ENST00000269886.7_1	chr19:4360367-4400544	-	4.87737	0.0232699
WDR77-201	WDR77	ENST00000235090.9_1	chr1:111982512-111991998	-	4.87448	0.0180406
ATXN7L3B-201	ATXN7L3B	ENST00000519948.3_1	chr12:74931607-74939210	+	4.86311	0.0446634
VPS28-210	VPS28	ENST00000529182.5_1	chr8:145649000-145652366	-	4.82959	0.039783
CX3CR1-205	CX3CR1	ENST00000541347.5_1	chr3:39304986-39322764	-	4.82868	0.0258285
CCDC174-202	CCDC174	ENST00000383794.6_1	chr3:14693271-14714166	+	4.81957	0.00619944
SGPL1-202	SGPL1	ENST00000373202.7_1	chr10:72575726-72640930	+	4.81374	0.0285846
GSKIP-207	GSKIP	ENST00000556095.5_1	chr14:96829894-96853623	+	4.78341	0.0480509
TMPO-212	TMPO	ENST00000556029.5_2	chr12:98909290-98944157	+	4.77694	0.0230878
TOR4A-201	TOR4A	ENST00000357503.2_1	chr9:140172201-140177093	+	4.77663	0.0426646
ZNF706-209	ZNF706	ENST00000520347.5_1	chr8:102211166-102217515	-	4.76914	0.000190831
ST3GAL2-202	ST3GAL2	ENST00000393640.8_1	chr16:70409881-70434541	-	4.76518	0.0435255
NCLN-201	NCLN	ENST00000246117.8_1	chr19:3185598-3209568	+	4.75139	0.0275811
RNF103-201	RNF103	ENST00000237455.4_1	chr2:86830516-86850978	-	4.74941	0.000141308
ZPR1-201	ZPR1	ENST00000227322.7_2	chr11:116644515-116658766	-	4.74185	0.00716551
ZDHHC20-202	ZDHHC20	ENST00000382466.7_2	chr13:21946712-22033508	-	4.69178	0.0146217
JDP2-203	JDP2	ENST00000435893.6_1	chr14:75895060-75940814	+	4.67006	0.0241168
FZR1-203	FZR1	ENST00000441788.6_1	chr19:3506271-3538328	+	4.66912	0.0406225
RHOBTB2-201	RHOBTB2	ENST00000251822.6_1	chr8:22857092-22877712	+	4.64814	0.0133796
UNC50-204	UNC50	ENST00000409975.5_2	chr2:99225042-99234978	+	4.64203	0.0191648
ZNF783-202	ZNF783	ENST00000434415.5_1	chr7:148959262-148982082	+	4.64062	0.0157534
PDCD6IP-201	PDCD6IP	ENST00000307296.7_1	chr3:33839844-33911194	+	4.63915	0.00183059
C15ORF37-201	C15ORF37	ENST00000542003.1	chr15:80215507-80217194	+	4.63692	0.0177354
DMAC1-201	DMAC1	ENST00000358227.4_1	chr9:7796490-7800067	-	4.62081	0.028528
FKBP3-201	FKBP3	ENST00000216330.7_1	chr14:45584803-45604522	-	4.61064	0.0479617
FBXO41-205	FBXO41	ENST00000521871.5_1	chr2:73481818-73511559	-	4.60991	0.0371681
TST-202	TST	ENST00000403892.7_1	chr22:37406900-37415508	-	4.60602	0.0291279
C17orf113-201	C17orf113	ENST00000587304.2_2	chr17:40190250-40202632	-	4.59421	0.0395332
TRIM44-201	TRIM44	ENST00000299413.6_1	chr11:35684353-35839557	+	4.59094	0.000520236
DRAP1-201	DRAP1	ENST00000312515.6_1	chr11:65686728-65689032	+	4.57309	0.0186795
FOXO1-201	FOXO1	ENST00000379561.5_1	chr13:41129804-41240734	-	4.55688	0.0474613
QSOX2-201	QSOX2	ENST00000358701.9_2	chr9:139098179-139137687	-	4.53678	0.0328775
ANP32E-208	ANP32E	ENST00000583931.5_3	chr1:150190717-150208504	-	4.5179	0.0352831
NCKAP5L-201	NCKAP5L	ENST00000335999.6_2	chr12:50184929-50222208	-	4.4901	0.0085729
P2RX7-202	P2RX7	ENST00000328963.9_1	chr12:121570631-121625835	+	4.4865	0.0386595
DGAT1-206	DGAT1	ENST00000528718.5_1	chr8:145538247-145550573	-	4.4775	0.000223591
PCSK7-201	PCSK7	ENST00000320934.7_1	chr11:117075053-117103241	-	4.46639	0.0326317
SCFD2-202	SCFD2	ENST00000401642.7_1	chr4:53739149-54232242	-	4.46338	0.0485473
SLAMF6-203	SLAMF6	ENST00000368059.7_1	chr1:160454820-160493052	-	4.46306	0.0143217
ANKRD12-203	ANKRD12	ENST00000400020.7_1	chr18:9137561-9283757	+	4.45769	0.015687
EXTL3-201	EXTL3	ENST00000220562.8_1	chr8:28558844-28611204	+	4.44383	0.0204591
CAMK2D-201	CAMK2D	ENST00000296402.9_1	chr4:114372188-114683083	-	4.41991	0.00559699
USP20-201	USP20	ENST00000315480.8_1	chr9:132597749-132644107	+	4.41784	0.0120683
RPUSD2-203	RPUSD2	ENST00000616318.1_1	chr15:40861636-40862266	+	4.41446	0.0428957
PIEZO1-201	PIEZO1	ENST00000301015.13_2	chr16:88781754-88851619	-	4.40829	0.0412376
ZDHHC5-201	ZDHHC5	ENST00000287169.7_1	chr11:57435368-57468659	+	4.39713	0.0279252
TSR1-201	TSR1	ENST00000301364.9_1	chr17:2225797-2240801	-	4.39137	0.00543915
CEBPG-201	CEBPG	ENST00000284000.8_1	chr19:33864236-33873592	+	4.38612	0.00656275
MRPS21-201	MRPS21	ENST00000581066.2_1	chr1:150266340-150281414	+	4.35809	0.0270047
HNRNPC-208	HNRNPC	ENST00000553753.5_1	chr14:21678741-21737562	-	4.35303	0.0222275
UBE2D1-201	UBE2D1	ENST00000373910.8_1	chr10:60094735-60130513	+	4.34735	0.0157735
GGCT-202	GGCT	ENST00000275428.8_1	chr7:30536237-30544460	-	4.345	0.0175412
ARFRP1-208	ARFRP1	ENST00000612256.4_1	chr20:62329995-62339010	-	4.34228	0.000188093
RAB33B-201	RAB33B	ENST00000305626.5_1	chr4:140374961-140397763	+	4.32866	0.00514106
KLHL21-202	KLHL21	ENST00000377663.3_1	chr1:6650784-6663061	-	4.32559	0.00917601
SSB-202	SSB	ENST00000409333.1_1	chr2:170655789-170668574	+	4.31996	0.0362689
TAGLN-207	TAGLN	ENST00000532870.5_1	chr11:117072589-117075494	+	4.31341	7.31286e-05
MON1B-201	MON1B	ENST00000248248.7_1	chr16:77224816-77236302	+	4.30614	0.00269172
RALGPS2-203	RALGPS2	ENST00000367634.6_1	chr1:178694282-178890976	+	4.28753	0.00452162
RNF187-201	RNF187	ENST00000305943.7_2	chr1:228674762-228683467	+	4.28683	0.0342237
CRTC1-202	CRTC1	ENST00000338797.10_1	chr19:18794488-18893143	+	4.27712	0.00321935
UPF2-201	UPF2	ENST00000356352.6_1	chr10:11962021-12077896	-	4.27708	0.012154
KRI1-201	KRI1	ENST00000312962.10_1	chr19:10663754-10676713	-	4.26664	0.0169514
STK25-201	STK25	ENST00000316586.8_1	chr2:242432089-242448107	-	4.26151	0.00205286
AEBP1-201	AEBP1	ENST00000223357.7_1	chr7:44143960-44154159	+	4.25972	0.0108091
BIN2-210	BIN2	ENST00000615107.4_3	chr12:51674822-51717982	-	4.22267	0.0355652
ZNF680-201	ZNF680	ENST00000309683.10_1	chr7:63980262-64023484	-	4.20571	0.0427618
NFE2L2-202	NFE2L2	ENST00000397063.8_2	chr2:178095033-178128528	-	4.19837	0.00632585
CCDC47-201	CCDC47	ENST00000225726.9_1	chr17:61822610-61851135	-	4.19313	0.0170924
DDX5-210	DDX5	ENST00000578804.5_2	chr17:62496032-62502074	-	4.18031	0.0373488
PHF14-201	PHF14	ENST00000403050.7_1	chr7:11013499-11143282	+	4.1765	9.48174e-05
SMARCD2-203	SMARCD2	ENST00000448276.6_1	chr17:61909444-61920300	-	4.17394	0.0491865
GOLGA3-201	GOLGA3	ENST00000204726.7_4	chr12:133345495-133405288	-	4.16566	0.0415053
CDK14-202	CDK14	ENST00000380050.7_1	chr7:90225811-90839905	+	4.1624	0.00441209
ACAP2-201	ACAP2	ENST00000326793.10_2	chr3:194995465-195163807	-	4.14047	0.0268915
TMX4-201	TMX4	ENST00000246024.6_1	chr20:7957995-8000476	-	4.13573	0.0177632
XKR8-201	XKR8	ENST00000373884.5_1	chr1:28285973-28294607	+	4.12887	0.00581715
PABPC1-218	PABPC1	ENST00000521865.5_1	chr8:101730315-101734977	-	4.11844	0.0337226
FOXK2-211	FOXK2	ENST00000575578.1_3	chr17:80544006-80545438	+	4.11765	0.0447378
LSP1-209	LSP1	ENST00000432093.1_1	chr11:1897707-1908096	+	4.11174	0.0204421
AL358813.2-201	AL358813.2	ENST00000369173.2	chr1:149675978-149676609	+	4.1046	0.0197499
BICDL1-201	BICDL1	ENST00000397558.6_2	chr12:120427673-120532298	+	4.10235	0.0258206
CDK8-201	CDK8	ENST00000381527.7_1	chr13:26828276-26979375	+	4.10096	0.0084381
MRPL38-201	MRPL38	ENST00000309352.3_1	chr17:73894724-73901494	-	4.09563	0.012638
ERN1-201	ERN1	ENST00000433197.3_1	chr17:62116502-62207485	-	4.08873	0.00847137
DNMT3A-201	DNMT3A	ENST00000264709.7_2	chr2:25450724-25565459	-	4.083	0.0455801
RAB10-201	RAB10	ENST00000264710.4_1	chr2:26256979-26360323	+	4.07667	0.0203712
PAG1-201	PAG1	ENST00000220597.4_1	chr8:81880045-82024303	-	4.07061	0.00682544
MPC2-202	MPC2	ENST00000367846.8_1	chr1:167885967-167905278	-	4.05739	0.0129605
P2RY12-201	P2RY12	ENST00000302632.3_1	chr3:151055168-151102600	-	4.05588	0.0156994
EID2-201	EID2	ENST00000390658.3_2	chr19:40029345-40030973	-	4.03671	0.0425671
RBM23-203	RBM23	ENST00000359890.7_2	chr14:23362415-23388393	-	4.03592	0.0387566
ZNF148-201	ZNF148	ENST00000360647.8_1	chr3:124944405-125094198	-	4.03508	0.0442125
TIGD3-201	TIGD3	ENST00000309880.5_1	chr11:65122238-65125084	+	4.02584	0.0249
HDAC4-215	HDAC4	ENST00000543185.5_1	chr2:239969865-240322643	-	4.00998	0.0281719
CNDP2-201	CNDP2	ENST00000324262.8_1	chr18:72163443-72190689	+	3.98129	0.0439494
FOXJ3-204	FOXJ3	ENST00000372572.5_2	chr1:42642210-42800636	-	3.96941	0.0335755
ZDHHC7-201	ZDHHC7	ENST00000313732.8_1	chr16:85007787-85045141	-	3.96453	0.0101776
GRAP2-203	GRAP2	ENST00000420971.5_3	chr22:40322595-40356179	+	3.96369	0.0477433
ZNF100-202	ZNF100	ENST00000358296.10_3	chr19:21905568-21950430	-	3.96246	0.0112189
PPM1M-201	PPM1M	ENST00000296487.8_2	chr3:52280186-52284611	+	3.95891	0.00817939
HELB-201	HELB	ENST00000247815.8_1	chr12:66696325-66741425	+	3.95754	0.0403732
KLC2-202	KLC2	ENST00000394065.2_1	chr11:66028384-66035330	+	3.95089	0.00645095
AATK-201	AATK	ENST00000326724.8_1	chr17:79091095-79139817	-	3.94002	0.0356275
LAMP2-202	LAMP2	ENST00000371335.4_1	chrX:119570349-119603161	-	3.93668	0.0282674
VENTX-201	VENTX	ENST00000325980.9_1	chr10:135050908-135055433	+	3.93238	0.0499701
TMEM55B-201	TMEM55B	ENST00000250489.8_1	chr14:20925878-20929771	-	3.93121	0.0249021
GJA1-201	GJA1	ENST00000282561.3_1	chr6:121756838-121770873	+	3.91129	0.0485972
TARBP1-201	TARBP1	ENST00000040877.1_1	chr1:234527059-234614849	-	3.90704	0.00450971
PSME4-202	PSME4	ENST00000404125.5_1	chr2:54091204-54197977	-	3.89684	0.0232906
WASHC1-201	WASHC1	ENST00000442898.4_1	chr9:14521-29739	-	3.88101	0.0108732
KCTD20-202	KCTD20	ENST00000373731.6_1	chr6:36410544-36458920	+	3.88047	0.0279417
MEPCE-201	MEPCE	ENST00000310512.3_1	chr7:100027254-100031749	+	3.87393	0.0443879
NOM1-201	NOM1	ENST00000275820.3_1	chr7:156742417-156765876	+	3.8613	0.00483034
MEGF6-202	MEGF6	ENST00000356575.8_1	chr1:3406490-3528059	-	3.8538	0.00232307
ZNF496-201	ZNF496	ENST00000294753.8_1	chr1:247460714-247495045	-	3.84693	0.00111688
LRRC37A2-203	LRRC37A2	ENST00000576629.5_1	chr17:44588877-44633016	+	3.83273	0.033323
SMPD4-202	SMPD4	ENST00000409031.5_3	chr2:130908982-130940323	-	3.83248	0.0267154
ABCA2-201	ABCA2	ENST00000265662.9_1	chr9:139901686-139922740	-	3.81952	0.00235832
EPC1-202	EPC1	ENST00000319778.10_1	chr10:32556679-32636146	-	3.81619	2.09478e-05
VAMP4-201	VAMP4	ENST00000236192.11_1	chr1:171669300-171711387	-	3.79999	0.0457986
ABCB8-202	ABCB8	ENST00000358849.8_1	chr7:150725510-150744869	+	3.79834	0.0250545
PTPRS-204	PTPRS	ENST00000587303.5_3	chr19:5206379-5286251	-	3.79599	0.0458337
SLC9A9-201	SLC9A9	ENST00000316549.10_1	chr3:142984064-143567373	-	3.79298	0.0343977
TCP11L2-204	TCP11L2	ENST00000548428.1_1	chr12:106697271-106708271	+	3.77484	0.00228292
TMEM268-202	TMEM268	ENST00000374049.4_2	chr9:117373486-117408702	+	3.77057	0.0185221
ESD-202	ESD	ENST00000378720.7_1	chr13:47345391-47371367	-	3.77002	0.00178232
FAM111A-204	FAM111A	ENST00000528737.5_1	chr11:58910221-58922512	+	3.76863	0.00117322
SUMF2-208	SUMF2	ENST00000434526.6_1	chr7:56131917-56148363	+	3.75906	0.0480024
LRPPRC-201	LRPPRC	ENST00000260665.11_1	chr2:44113647-44223144	-	3.75887	0.00451081
HECTD4-202	HECTD4	ENST00000377560.9_1	chr12:112597994-112820243	-	3.75096	0.0357008
ANAPC7-203	ANAPC7	ENST00000455511.7_1	chr12:110810705-110841535	-	3.74635	0.00953067
FMNL1-208	FMNL1	ENST00000589911.1_3	chr17:43322691-43323920	+	3.73471	0.0180693
ZBTB42-201	ZBTB42	ENST00000342537.7_1	chr14:105267250-105271049	+	3.72894	0.00299839
SERPINA1-205	SERPINA1	ENST00000404814.8_1	chr14:94844726-94856999	-	3.71504	0.00714516
JADE2-203	JADE2	ENST00000395003.5_2	chr5:133861798-133918920	+	3.7015	0.0445311
RCOR1-201	RCOR1	ENST00000262241.6_1	chr14:103058998-103196913	+	3.69122	0.0461685
CEP57-202	CEP57	ENST00000325542.9_1	chr11:95523625-95565857	+	3.68429	0.0179624
NASP-201	NASP	ENST00000350030.7_1	chr1:46049732-46084566	+	3.68216	0.0279038
PHKB-205	PHKB	ENST00000564873.1_2	chr16:47496578-47533742	+	3.67796	0.0467429
NUP43-201	NUP43	ENST00000340413.6_1	chr6:150045451-150067708	-	3.64935	0.0156199
RNF216-205	RNF216	ENST00000425013.6_1	chr7:5659678-5821327	-	3.62911	0.00728951
CHML-201	CHML	ENST00000366553.2_2	chr1:241792155-241803556	-	3.6246	0.0219666
MAP2K7-202	MAP2K7	ENST00000397981.7_1	chr19:7968728-7979363	+	3.62205	0.00576514
PHF12-205	PHF12	ENST00000577226.5_1	chr17:27232271-27278325	-	3.61492	0.0215747
MICU1-202	MICU1	ENST00000398761.8_1	chr10:74127085-74385949	-	3.60586	0.0295392
LMF2-201	LMF2	ENST00000216080.5_3	chr22:50941380-50946113	-	3.59964	0.0424039
ZNF513-201	ZNF513	ENST00000323703.10_1	chr2:27600098-27603592	-	3.59759	0.0323652
CD180-201	CD180	ENST00000256447.5_2	chr5:66475441-66492627	-	3.58792	0.0195887
SEL1L-201	SEL1L	ENST00000336735.8_1	chr14:81937893-82000205	-	3.57808	0.0470807
DENND4C-209	DENND4C	ENST00000602925.5_1	chr9:19230433-19372856	+	3.57445	0.0257735
WHAMM-201	WHAMM	ENST00000286760.5_1	chr15:83478380-83504860	+	3.56682	0.0420092
TMEM167B-201	TMEM167B	ENST00000338272.8_1	chr1:109632425-109639556	+	3.56034	0.0426607
KIAA0141-202	KIAA0141	ENST00000432126.6_1	chr5:141303373-141321612	+	3.5547	0.0484942
RNF111-201	RNF111	ENST00000348370.8_1	chr15:59279854-59389618	+	3.55342	0.00110378
MARCH9-201	MARCH9	ENST00000266643.5_1	chr12:58148881-58154190	+	3.55118	0.0292049
PHF2-201	PHF2	ENST00000359246.8_1	chr9:96338689-96441869	+	3.54354	0.0145823
SMARCD3-203	SMARCD3	ENST00000392811.6_1	chr7:150936059-150974538	-	3.5372	0.044583
SPG7-201	SPG7	ENST00000268704.6_1	chr16:89574811-89624174	+	3.53235	0.0144221
USP11-204	USP11	ENST00000377107.6_1	chrX:47092089-47107727	+	3.53046	0.041106
SMPD3-201	SMPD3	ENST00000219334.9_1	chr16:68392228-68482591	-	3.52167	0.000545488
TMEM110-201	TMEM110	ENST00000355083.9_1	chr3:52870772-52931612	-	3.51833	0.0249855
SERINC5-202	SERINC5	ENST00000507668.6_1	chr5:79434550-79551898	-	3.51442	0.0173814
PTPN23-201	PTPN23	ENST00000265562.4_1	chr3:47422510-47454931	+	3.49358	0.035636
HTT-201	HTT	ENST00000355072.9_1	chr4:3076408-3245686	+	3.49307	0.0468999
CLCN7-202	CLCN7	ENST00000382745.8_1	chr16:1494936-1525581	-	3.48953	0.0281959
SETDB2-203	SETDB2	ENST00000354234.8_1	chr13:50018510-50069139	+	3.48783	0.0166801
ZMYND8-204	ZMYND8	ENST00000355972.8_1	chr20:45837859-45985633	-	3.48097	0.00624139
BMP2K-203	BMP2K	ENST00000502613.1_3	chr4:79780778-79837526	+	3.47029	0.00103994
PRAG1-201	PRAG1	ENST00000615670.4_1	chr8:8175259-8244008	-	3.46495	0.0328318
ZNF337-202	ZNF337	ENST00000376436.5_1	chr20:25654851-25667593	-	3.46324	0.0310697
CHSY1-201	CHSY1	ENST00000254190.3_1	chr15:101715928-101792137	-	3.44756	0.0389325
PPARD-201	PPARD	ENST00000311565.4_1	chr6:35310391-35395955	+	3.43368	0.011749
ADI1-201	ADI1	ENST00000327435.10_1	chr2:3501132-3523507	-	3.43183	0.00656847
RPRD1A-202	RPRD1A	ENST00000399022.8_1	chr18:33569787-33647539	-	3.42842	0.031431
IGIP-201	IGIP	ENST00000333305.4_1	chr5:139505520-139508977	+	3.41435	0.0261649
ZC3H12D-201	ZC3H12D	ENST00000409806.7_2	chr6:149767931-149806197	-	3.40809	0.0265604
LACTB-202	LACTB	ENST00000413507.3_1	chr15:63414032-63423670	+	3.39504	0.0298622
FKRP-201	FKRP	ENST00000318584.9_1	chr19:47249303-47261742	+	3.35855	0.0400872
ZZZ3-202	ZZZ3	ENST00000370801.7_1	chr1:78030185-78148343	-	3.35827	0.000442475
ARCN1-202	ARCN1	ENST00000359415.8_1	chr11:118443139-118473643	+	3.35664	0.0214556
SMURF1-201	SMURF1	ENST00000361125.1_1	chr7:98625064-98741723	-	3.34883	0.0312202
ZNF765-201	ZNF765	ENST00000396408.7_1	chr19:53898403-53915260	+	3.34077	0.0349525
ARMC5-203	ARMC5	ENST00000457010.6_3	chr16:31470145-31478487	+	3.33703	0.0178893
TCF4-278	TCF4	ENST00000636400.2_1	chr18:52889565-53257009	-	3.31918	0.0354787
POLD3-201	POLD3	ENST00000263681.6_1	chr11:74303575-74354102	+	3.31792	8.2971e-05
CPEB2-209	CPEB2	ENST00000538197.5_1	chr4:15004298-15071777	+	3.30531	0.0134775
MICALL1-201	MICALL1	ENST00000215957.10_1	chr22:38302304-38338829	+	3.30092	0.029657
ITPRIPL1-201	ITPRIPL1	ENST00000361124.5_1	chr2:96991961-96996255	+	3.29962	0.0309673
BCL11A-201	BCL11A	ENST00000335712.10_2	chr2:60684333-60780633	-	3.29656	0.0152109
BEND2-202	BEND2	ENST00000380033.8_1	chrX:18181051-18239003	-	3.29284	0.0496732
STK26-202	STK26	ENST00000394334.6_1	chrX:131157293-131209971	+	3.28716	0.01871
MYO5A-205	MYO5A	ENST00000399231.7_1	chr15:52599480-52821247	-	3.2701	0.0360315
CXorf38-203	CXorf38	ENST00000378426.5_2	chrX:40486173-40506806	-	3.26743	0.00527428
GATC-203	GATC	ENST00000551765.5_1	chr12:120884241-120901552	+	3.26397	0.026921
ITGAV-201	ITGAV	ENST00000261023.7_2	chr2:187454792-187545628	+	3.25798	0.00606642
BBX-206	BBX	ENST00000415149.6_1	chr3:107241783-107530171	+	3.24907	0.00592041
INAFM2-202	INAFM2	ENST00000638170.1_1	chr15:40615865-40618916	+	3.24841	0.00329781
RBM3-201	RBM3	ENST00000354480.2_1	chrX:48434287-48436679	+	3.24643	0.0204162
MIEF2-201	MIEF2	ENST00000323019.8_1	chr17:18163848-18169866	+	3.24306	0.0432667
RRP15-201	RRP15	ENST00000366932.3_1	chr1:218458629-218511325	+	3.23337	1.92635e-05
MGME1-203	MGME1	ENST00000377710.9_1	chr20:17949556-17971765	+	3.21966	0.0124336
NEMF-201	NEMF	ENST00000298310.9_1	chr14:50248801-50319921	-	3.21709	0.0386987
AC132186.1-201	AC132186.1	ENST00000544589.1	chr16:66516775-66519747	-	3.21511	0.0132352
KIF22-203	KIF22	ENST00000561482.5_1	chr16:29802040-29816705	+	3.21455	0.0332589
ARFGEF1-201	ARFGEF1	ENST00000262215.7_1	chr8:68109884-68255912	-	3.2124	0.01754
LGALS12-201	LGALS12	ENST00000255684.9_1	chr11:63273556-63284239	+	3.21017	1.3135e-05
SEC63-201	SEC63	ENST00000369002.8_1	chr6:108188960-108279393	-	3.18965	0.00606531
C20orf194-201	C20orf194	ENST00000252032.9_1	chr20:3229951-3388272	-	3.18858	0.036262
RUSC2-202	RUSC2	ENST00000455600.1_1	chr9:35538629-35561895	+	3.18467	0.0423468
RTL10-202	RTL10	ENST00000405640.1_1	chr22:19833669-19842409	-	3.16956	0.0184631
CDH23-201	CDH23	ENST00000224721.10_1	chr10:73156691-73575704	+	3.16899	0.00664993
LIN7C-201	LIN7C	ENST00000278193.6_1	chr11:27516123-27528320	-	3.16107	0.0341749
PLD4-201	PLD4	ENST00000392593.8_1	chr14:105391160-105404127	+	3.14713	0.0039973
CDH23-207	CDH23	ENST00000442677.3_1	chr10:73405673-73477664	+	3.13693	0.00118837
SPATA5-201	SPATA5	ENST00000274008.4_1	chr4:123844229-124240605	+	3.12843	0.0282029
HMGB2-204	HMGB2	ENST00000506267.1_2	chr4:174254040-174255400	-	3.12618	0.00801493
ZNF586-201	ZNF586	ENST00000391702.3_1	chr19:58281023-58291982	+	3.12529	0.0357768
RSF1-201	RSF1	ENST00000308488.10_1	chr11:77371041-77532063	-	3.11988	0.00623376
SPECC1L-201	SPECC1L	ENST00000314328.13_1	chr22:24666808-24813708	+	3.11709	0.0106941
MIEF1-201	MIEF1	ENST00000325301.6_3	chr22:39898358-39914137	+	3.11523	0.0426188
ZDHHC24-201	ZDHHC24	ENST00000310442.4_2	chr11:66303369-66313709	-	3.09937	0.0495802
FNIP1-205	FNIP1	ENST00000615660.4_1	chr5:130977408-131132756	-	3.09795	0.0444015
ST3GAL3-201	ST3GAL3	ENST00000262915.7_1	chr1:44173204-44396837	+	3.08773	0.0238351
ENTPD6-202	ENTPD6	ENST00000360031.6_2	chr20:25176337-25207365	+	3.08213	0.0181767
VPS37A-201	VPS37A	ENST00000324849.8_1	chr8:17104080-17155533	+	3.07166	0.00908495
SPPL2A-201	SPPL2A	ENST00000261854.9_2	chr15:50994463-51058005	-	3.07043	0.0149944
AP5S1-205	AP5S1	ENST00000615891.1_1	chr20:3801203-3809484	+	3.06892	0.00606459
OS9-201	OS9	ENST00000257966.12_1	chr12:58087928-58115338	+	3.06182	0.00909419
RBM26-207	RBM26	ENST00000622611.4_1	chr13:79893003-79980356	-	3.05774	0.0121038
CXCL2-202	CXCL2	ENST00000508487.2_1	chr4:74962752-74965010	-	3.05242	0.0201815
APOBEC3F-201	APOBEC3F	ENST00000308521.9_1	chr22:39436609-39449915	+	3.03544	0.0432939
MBD4-203	MBD4	ENST00000429544.6_1	chr3:129149787-129158872	-	3.03538	0.00627604
CKAP5-210	CKAP5	ENST00000529230.5_1	chr11:46764598-46867780	-	3.03052	0.0485639
INTS6-203	INTS6	ENST00000442263.4_1	chr13:52010562-52027151	-	3.02863	0.00348549
ZCRB1-201	ZCRB1	ENST00000266529.7_1	chr12:42705880-42719907	-	3.02022	0.0266697
ATP13A1-202	ATP13A1	ENST00000357324.10_1	chr19:19756012-19774502	-	3.01882	0.0136535
NID1-201	NID1	ENST00000264187.6_1	chr1:236139130-236228462	-	3.0114	0.0350902
ARHGDIA-217	ARHGDIA	ENST00000584461.5_1	chr17:79826136-79829205	-	2.99799	0.0080137
GTF3C4-201	GTF3C4	ENST00000372146.4_1	chr9:135545422-135570342	+	2.9884	0.000479858
CAPN5-201	CAPN5	ENST00000278559.7_1	chr11:76777988-76837201	+	2.98443	0.0129616
C2orf49-201	C2orf49	ENST00000258457.6_1	chr2:105953816-105965668	+	2.98049	0.0254201
GABBR1-205	GABBR1	ENST00000377034.8_1	chr6:29570015-29600962	-	2.97232	0.0229871
APOL1-201	APOL1	ENST00000319136.8_1	chr22:36649124-36663567	+	2.95836	0.0203038
FAM13A-201	FAM13A	ENST00000264344.9_3	chr4:89647106-89978323	-	2.94866	0.0402726
ASB6-203	ASB6	ENST00000450050.6_1	chr9:132396883-132404448	-	2.94596	0.00712902
MAN2B2-204	MAN2B2	ENST00000505907.1_1	chr4:6576942-6624128	+	2.93851	0.0187745
NOMO1-201	NOMO1	ENST00000287667.11_1	chr16:14927538-14990017	+	2.93333	0.00292562
ZNF526-201	ZNF526	ENST00000301215.7_1	chr19:42724423-42732353	+	2.92768	0.0024235
ANKRD10-211	ANKRD10	ENST00000603993.1_1	chr13:111535542-111545479	-	2.92668	0.0386615
ZNF292-202	ZNF292	ENST00000369577.7_1	chr6:87865267-87973914	+	2.91942	0.027481
OSBPL1A-201	OSBPL1A	ENST00000319481.7_1	chr18:21742008-21977823	-	2.91308	0.044499
CARNMT1-202	CARNMT1	ENST00000376834.7_1	chr9:77595936-77643310	-	2.9128	0.012818
SLC50A1-203	SLC50A1	ENST00000368404.8_1	chr1:155108326-155111329	+	2.91225	0.0455639
MYCBP-201	MYCBP	ENST00000397572.4_3	chr1:39328636-39339777	-	2.90155	0.0290832
ZBTB22-208	ZBTB22	ENST00000431845.2_1	chr6:33282195-33285512	-	2.89778	0.0351975
MDN1-201	MDN1	ENST00000369393.7_1	chr6:90352218-90529442	-	2.89753	0.00791891
GIMAP8-201	GIMAP8	ENST00000307271.3_1	chr7:150147718-150176480	+	2.8889	0.0309469
MAPKBP1-202	MAPKBP1	ENST00000457542.6_2	chr15:42066632-42120053	+	2.88809	0.0273393
MAST4-201	MAST4	ENST00000261569.11_1	chr5:66300448-66462879	+	2.88708	0.00861205
SGPP1-201	SGPP1	ENST00000247225.6_1	chr14:64150932-64194757	-	2.88556	0.0416005
ADM-206	ADM	ENST00000528655.5_2	chr11:10326631-10328902	+	2.8812	0.0427145
ANKRD9-201	ANKRD9	ENST00000286918.8_2	chr14:102968097-102976128	-	2.88025	0.0478295
OSCAR-208	OSCAR	ENST00000611261.4_1	chr19:54597935-54605994	-	2.87417	0.0103558
EYA3-203	EYA3	ENST00000373871.7_1	chr1:28296855-28415207	-	2.86776	0.0470062
TELO2-201	TELO2	ENST00000262319.10_1	chr16:1543364-1560458	+	2.86021	0.0349616
MPST-202	MPST	ENST00000397225.2_1	chr22:37419078-37425862	+	2.85443	0.0439413
RPRD2-203	RPRD2	ENST00000401000.8_1	chr1:150337126-150449042	+	2.85305	0.00791312
TMEM131-201	TMEM131	ENST00000186436.9_1	chr2:98372803-98612354	-	2.85209	0.00253991
SLC19A1-203	SLC19A1	ENST00000417954.5_1	chr21:46913486-46951455	-	2.83599	0.00892797
EIF3F-206	EIF3F	ENST00000531572.1_1	chr11:8016561-8017180	+	2.83376	0.00893783
CD83-201	CD83	ENST00000379153.3_1	chr6:14117872-14137149	+	2.83023	0.00188109
PAQR7-201	PAQR7	ENST00000374296.3_1	chr1:26187701-26197744	-	2.83016	0.0247969
KIAA0556-201	KIAA0556	ENST00000261588.8_3	chr16:27561473-27791690	+	2.82505	0.0309578
NBPF9-202	NBPF9	ENST00000338347.4	chr1:144811744-144830301	+	2.82072	0.00320953
OBSCN-210	OBSCN	ENST00000570156.6_2	chr1:228395831-228566575	+	2.81808	0.0225793
MSRB3-201	MSRB3	ENST00000308259.9_1	chr12:65672423-65860687	+	2.81753	0.0433358
PHOSPHO1-202	PHOSPHO1	ENST00000413580.5_1	chr17:47300732-47308128	-	2.80464	0.0211858
SLC12A7-201	SLC12A7	ENST00000264930.9_2	chr5:1050491-1112150	-	2.78716	0.00337324
MYOF-202	MYOF	ENST00000359263.8_1	chr10:95066187-95241951	-	2.78438	0.0448244
SARM1-208	SARM1	ENST00000585482.5_2	chr17:26698683-26731067	+	2.77433	0.00319985
ST6GALNAC6-205	ST6GALNAC6	ENST00000373146.5_1	chr9:130647600-130661932	-	2.77431	0.0151462
PMS1-213	PMS1	ENST00000441310.6_2	chr2:190649107-190742355	+	2.77419	0.0402597
EP400-203	EP400	ENST00000333577.8_1	chr12:132434516-132479557	+	2.76644	0.0182038
TXLNG-201	TXLNG	ENST00000380122.9_2	chrX:16804550-16862642	+	2.7631	0.00385482
DAZAP1-202	DAZAP1	ENST00000336761.10_1	chr19:1407568-1435683	+	2.76108	0.00833294
FAM76B-201	FAM76B	ENST00000358780.9_2	chr11:95502106-95522955	-	2.74327	0.00722037
RC3H2-201	RC3H2	ENST00000335387.9_1	chr9:125636065-125667494	-	2.72446	0.00262579
KATNB1-201	KATNB1	ENST00000379661.7_1	chr16:57769642-57791162	+	2.71839	0.0058141
DYM-201	DYM	ENST00000269445.10_1	chr18:46567844-46987172	-	2.71672	0.0428382
CMIP-202	CMIP	ENST00000537098.7_1	chr16:81478775-81745367	+	2.70021	0.00322792
FRYL-202	FRYL	ENST00000358350.8_2	chr4:48499380-48782316	-	2.69487	0.0261749
FAM156B-203	FAM156B	ENST00000593751.7_1	chrX:52926426-52937583	+	2.67473	0.00127546
INTS8-217	INTS8	ENST00000523731.5_1	chr8:95835527-95893974	+	2.66933	0.0162483
UBTF-203	UBTF	ENST00000393606.7_1	chr17:42284484-42297118	-	2.66283	0.0371251
PPP1R3E-201	PPP1R3E	ENST00000452015.8_3	chr14:23764852-23772057	-	2.65848	0.021182
EDF1-202	EDF1	ENST00000371648.4_1	chr9:139756942-139760718	-	2.64226	0.0335435
LRP10-201	LRP10	ENST00000359591.8_1	chr14:23340822-23350789	+	2.63207	0.0281702
CD48-201	CD48	ENST00000368045.3_1	chr1:160653309-160681593	-	2.60994	0.0106811
CDKAL1-201	CDKAL1	ENST00000274695.8_1	chr6:20534688-21232635	+	2.60735	0.0022621
DDHD1-203	DDHD1	ENST00000395606.5_1	chr14:53503463-53619922	-	2.60655	0.0467843
CTNND1-228	CTNND1	ENST00000531007.1_1	chr11:57577617-57583483	+	2.60517	0.000938224
ESD-204	ESD	ENST00000471867.2_2	chr13:47349521-47355703	-	2.60451	0.0429901
AC004832.3-202	AC004832.3	ENST00000439838.5_3	chr22:30805251-30824974	+	2.57979	0.0244172
RPS6KA5-207	RPS6KA5	ENST00000614987.4_2	chr14:91314206-91526952	-	2.55743	0.0373617
TRAM1-205	TRAM1	ENST00000521425.5_2	chr8:71485677-71520013	-	2.54925	0.0401675
NCOR1-205	NCOR1	ENST00000395857.7_1	chr17:15933410-16118874	-	2.54373	0.0492194
EDEM3-201	EDEM3	ENST00000318130.12_1	chr1:184659365-184724047	-	2.5276	0.0427938
HDAC2-205	HDAC2	ENST00000519065.5_1	chr6:114254192-114292449	-	2.5261	0.0404934
ASPRV1-201	ASPRV1	ENST00000320256.5_1	chr2:70187221-70189397	-	2.52171	0.020707
ITPR3-201	ITPR3	ENST00000374316.9_1	chr6:33588142-33664351	+	2.51678	0.0135176
ABHD4-203	ABHD4	ENST00000428304.6_1	chr14:23067146-23082121	+	2.5146	0.0367655
RALGAPA2-204	RALGAPA2	ENST00000430436.5_2	chr20:20370196-20620544	-	2.49533	0.0394816
ARHGAP27-207	ARHGAP27	ENST00000528273.5_1	chr17:43506718-43511787	-	2.46851	0.0234319
ZBTB20-216	ZBTB20	ENST00000482689.5_2	chr3:114099205-114173664	-	2.46247	0.0169522
TNC-202	TNC	ENST00000350763.8_2	chr9:117782813-117880536	-	2.44843	0.0487827
C16orf70-201	C16orf70	ENST00000219139.7_1	chr16:67143891-67182442	+	2.40513	0.0320688
SYAP1-201	SYAP1	ENST00000380155.3_1	chrX:16737755-16783459	+	2.39629	0.0489258
XYLT2-201	XYLT2	ENST00000017003.6_1	chr17:48423453-48438512	+	2.3947	0.0136093
FAM156A-221	FAM156A	ENST00000622447.4_1	chrX:52976462-52987681	-	2.36568	0.0144611
GNG11-201	GNG11	ENST00000248564.5_1	chr7:93551011-93557922	+	2.33217	0.0476023
GPATCH2-202	GPATCH2	ENST00000366935.7_1	chr1:217600334-217804424	-	2.3317	0.0402984
TAB3-205	TAB3	ENST00000378933.5_1	chrX:30845559-30993201	-	2.32204	0.0249115
EP400-204	EP400	ENST00000389561.6_1	chr12:132434465-132565011	+	2.31779	0.014256
INAFM1-201	INAFM1	ENST00000552360.3_1	chr19:47777710-47778964	+	2.31718	0.0170509
SLMAP-201	SLMAP	ENST00000295951.7_1	chr3:57741957-57914895	+	2.31649	0.0477562
NIPA2-201	NIPA2	ENST00000337451.7_1	chr15:23004684-23034408	-	2.31369	0.0167954
LRIG2-201	LRIG2	ENST00000361127.5_1	chr1:113615831-113674882	+	2.31007	0.0201489
QTRT2-201	QTRT2	ENST00000281273.8_1	chr3:113775584-113807269	+	2.30542	0.0442968
ITPR1-202	ITPR1	ENST00000354582.10_2	chr3:4535032-4889524	+	2.30248	0.0164286
BAP1-211	BAP1	ENST00000615113.1_1	chr3:52435689-52436177	-	2.30006	0.00212678
IDH1-203	IDH1	ENST00000415913.5_1	chr2:209100989-209119046	-	2.29816	0.00683258
UQCC2-204	UQCC2	ENST00000607484.5_2	chr6:33664538-33679504	-	2.2977	0.0475253
ZNF646-202	ZNF646	ENST00000394979.2_1	chr16:31087223-31095340	+	2.29478	0.0150502
ZNHIT6-202	ZNHIT6	ENST00000431532.6_2	chr1:86115106-86174116	-	2.29219	0.0169715
NXPE3-205	NXPE3	ENST00000491511.6_1	chr3:101498286-101546236	+	2.27503	0.00027022
TBCE-207	TBCE	ENST00000543662.3_4	chr1:235530675-235612281	+	2.26146	0.0103585
PHLPP2-201	PHLPP2	ENST00000393524.6_3	chr16:71678831-71749432	-	2.25649	0.00512712
TMEM121B-201	TMEM121B	ENST00000331437.3_1	chr22:17597190-17602143	-	2.22851	0.00366442
GMEB2-201	GMEB2	ENST00000266068.5_1	chr20:62218955-62251229	-	2.21744	0.0411782
RNF19A-211	RNF19A	ENST00000523167.1_1	chr8:101299933-101321754	-	2.20631	0.00956288
MYL6-219	MYL6	ENST00000551589.5_2	chr12:56552153-56555082	+	2.20252	0.00355245
EML6-201	EML6	ENST00000356458.6_1	chr2:54951679-55199154	+	2.18349	0.00633467
UGGT2-203	UGGT2	ENST00000376747.7_1	chr13:96453834-96705637	-	2.18224	0.000232525
COBLL1-203	COBLL1	ENST00000392717.6_1	chr2:165536696-165698678	-	2.17581	0.00630797
LRRC37A-201	LRRC37A	ENST00000320254.5_1	chr17:44372497-44415160	+	2.17164	0.0170702
LRRC37A3-211	LRRC37A3	ENST00000584306.5_1	chr17:62850488-62914903	-	2.16516	0.0197916
NSD3-208	NSD3	ENST00000528627.1_1	chr8:38177273-38184353	-	2.15231	0.0434
DHTKD1-201	DHTKD1	ENST00000263035.8_1	chr10:12110971-12165224	+	2.14412	0.000691389
SNED1-201	SNED1	ENST00000310397.12_3	chr2:241938255-242034983	+	2.13767	0.000525496
LHFPL2-201	LHFPL2	ENST00000380345.6_1	chr5:77781040-77944648	-	2.12564	0.0156119
CAPN7-201	CAPN7	ENST00000253693.6_1	chr3:15247750-15294425	+	2.12067	0.0467033
ERMP1-202	ERMP1	ENST00000339450.9_1	chr9:5784573-5833117	-	2.10889	0.0389142
GNAI3-201	GNAI3	ENST00000369851.5_1	chr1:110091233-110160943	+	2.10842	0.0438248
PPP1CC-204	PPP1CC	ENST00000546933.5_1	chr12:111158726-111170788	-	2.10458	0.0270626
ZNF813-201	ZNF813	ENST00000396403.8_1	chr19:53970989-53999509	+	2.10187	0.0103481
COTL1-206	COTL1	ENST00000567786.2_1	chr16:84649610-84651165	-	2.08662	0.0390632
TRAF3-201	TRAF3	ENST00000347662.8_1	chr14:103243816-103377836	+	2.07723	0.0151966
IKZF5-201	IKZF5	ENST00000368886.9_1	chr10:124750322-124768333	-	2.06662	0.0350064
SCML4-203	SCML4	ENST00000369022.6_1	chr6:108025308-108145521	-	2.0575	0.0108803
IFI44L-202	IFI44L	ENST00000450498.1_1	chr1:79093670-79095872	+	2.04778	0.0421437
RMDN1-201	RMDN1	ENST00000406452.7_1	chr8:87484579-87521009	-	2.04774	0.0453569
ANO10-201	ANO10	ENST00000292246.7_2	chr3:43407340-43663560	-	2.04457	0.0435871
AGFG1-201	AGFG1	ENST00000310078.12_1	chr2:228336878-228425930	+	2.04059	0.0354549
SUPT7L-204	SUPT7L	ENST00000406540.5_1	chr2:27875919-27886507	-	2.04057	0.0204784
CSRP1-202	CSRP1	ENST00000367306.5_1	chr1:201452658-201478584	-	2.02875	0.00936951
INPP5F-201	INPP5F	ENST00000361976.6_1	chr10:121485609-121588790	+	2.02468	0.0455171
FAM135A-205	FAM135A	ENST00000418814.6_3	chr6:71123011-71270877	+	2.01599	0.0365408
TIMM13-201	TIMM13	ENST00000215570.7_1	chr19:2425622-2427892	-	2.01597	0.00351737
SRD5A1-201	SRD5A1	ENST00000274192.6_2	chr5:6633456-6674499	+	2.00993	0.00708179
SLC16A6-201	SLC16A6	ENST00000327268.8_1	chr17:66263167-66287257	-	2.00779	0.0145127
CLCF1-201	CLCF1	ENST00000312438.7_1	chr11:67131639-67141208	-	2.007	0.0440983
DNASE1L1-205	DNASE1L1	ENST00000369809.5_1	chrX:153629579-153640427	-	2.00225	0.00794286
PLBD2-201	PLBD2	ENST00000280800.4_1	chr12:113796375-113829430	+	2.00071	0.00298377
TPRG1L-202	TPRG1L	ENST00000378344.6_1	chr1:3541566-3546691	+	1.99753	0.039262
MRPL10-201	MRPL10	ENST00000290208.11_1	chr17:45900827-45907039	-	1.99455	0.024693
PFAS-201	PFAS	ENST00000314666.10_1	chr17:8152604-8173803	+	1.97585	0.00609088
PAPOLG-201	PAPOLG	ENST00000238714.7_1	chr2:60983365-61026098	+	1.93886	0.0395278
CDC42EP3-206	CDC42EP3	ENST00000611976.1_1	chr2:37869025-37899678	-	1.91721	0.0292511
LDOC1-201	LDOC1	ENST00000370526.3_1	chrX:140269930-140271310	-	1.89513	6.73986e-05
NR3C1-203	NR3C1	ENST00000394464.6_1	chr5:142657496-142783265	-	1.87947	0.0104118
MOSPD2-201	MOSPD2	ENST00000380492.7_1	chrX:14891563-14940449	+	1.86851	0.0188502
ATP9A-202	ATP9A	ENST00000338821.5_2	chr20:50213053-50385173	-	1.85889	0.0123302
ZNF439-201	ZNF439	ENST00000304030.2_1	chr19:11976772-11980306	+	1.85144	0.0367301
CARF-202	CARF	ENST00000402905.7_3	chr2:203776937-203851786	+	1.83925	0.0212978
CARMIL1-201	CARMIL1	ENST00000329474.6_1	chr6:25279656-25620758	+	1.83435	0.0115567
SLC12A4-201	SLC12A4	ENST00000316341.7_1	chr16:67977377-68002597	-	1.83329	0.00174408
SLC25A12-202	SLC25A12	ENST00000422440.6_1	chr2:172640880-172750762	-	1.82454	0.00275905
PDRG1-201	PDRG1	ENST00000202017.5_1	chr20:30532145-30539895	-	1.81847	0.00650929
VCL-201	VCL	ENST00000211998.9_2	chr10:75757872-75879918	+	1.80195	0.0468158
KLHL14-202	KLHL14	ENST00000359358.8_1	chr18:30252634-30353025	-	1.79388	0.0127088
ZNF860-201	ZNF860	ENST00000360311.4_1	chr3:32023266-32033120	+	1.77779	0.0388628
ATG14-201	ATG14	ENST00000247178.5_1	chr14:55833110-55878576	-	1.75087	0.00551469
IER5L-201	IER5L	ENST00000372491.3_1	chr9:131937831-131940541	-	1.74408	0.0303434
MFSD14C-208	MFSD14C	ENST00000637864.1_1	chr9:99705195-99775882	-	1.73169	0.0378381
CPQ-201	CPQ	ENST00000220763.9_1	chr8:97657455-98155729	+	1.7287	0.000832905
MAGEH1-201	MAGEH1	ENST00000342972.2_1	chrX:55478538-55479999	+	1.68548	0.0161737
SIAH1-202	SIAH1	ENST00000380006.2_1	chr16:48394442-48397793	-	1.67855	0.0249945
ZNF45-201	ZNF45	ENST00000269973.9_1	chr19:44416781-44439411	-	1.66849	0.0442271
PHF6-201	PHF6	ENST00000332070.7_1	chrX:133507342-133562819	+	1.64151	0.010386
MS4A1-203	MS4A1	ENST00000524807.5_1	chr11:60223225-60229869	+	1.64121	0.0124164
ZNF841-203	ZNF841	ENST00000594295.5_1	chr19:52567719-52597358	-	1.63789	0.0115372
PRDM2-202	PRDM2	ENST00000311066.9_1	chr1:14031350-14114554	+	1.61525	0.0142688
TTYH2-202	TTYH2	ENST00000441391.6_1	chr17:72244097-72258155	+	1.61341	0.00337835
MED9-201	MED9	ENST00000268711.3_1	chr17:17380300-17396540	+	1.61317	0.00523471
ZNF619-204	ZNF619	ENST00000447116.6_1	chr3:40518604-40531727	+	1.61022	0.00852489
NUDT5-207	NUDT5	ENST00000491614.5_1	chr10:12207324-12238123	-	1.5983	0.00341448
CD109-203	CD109	ENST00000437994.6_1	chr6:74405508-74538040	+	1.59644	0.0474368
SMG8-203	SMG8	ENST00000578922.1_1	chr17:57287228-57289405	+	1.59363	0.00441955
RP11-231C14.4-001	RP11-231C14.4	ENST00000550665.1	chr16:29496011-29517141	-	1.57509	0.0279341
RFT1-201	RFT1	ENST00000296292.7_1	chr3:53122499-53164478	-	1.56088	2.89467e-05
NFX1-201	NFX1	ENST00000318524.6_1	chr9:33290543-33348721	+	1.54644	0.000499718
APOOL-203	APOOL	ENST00000622540.4_1	chrX:84258898-84348322	+	1.54497	0.0341272
PKNOX1-203	PKNOX1	ENST00000432907.6_1	chr21:44394620-44454041	+	1.5311	0.00693821
TMEM33-203	TMEM33	ENST00000504986.5_1	chr4:41937137-41962589	+	1.52769	0.0280945
RAPH1-202	RAPH1	ENST00000319170.9_1	chr2:204298405-204400133	-	0.518233	0.0252273
SLC4A7-203	SLC4A7	ENST00000425128.6_1	chr3:27414212-27525911	-	0.486587	0.0328175
GPALPP1-201	GPALPP1	ENST00000357537.4_1	chr13:45579245-45611804	+	0.438104	0.0461682
NARS-201	NARS	ENST00000256854.9_1	chr18:55267888-55289405	-	0.395123	0.0140841
CTSB-202	CTSB	ENST00000353047.10_1	chr8:11700033-11725738	-	0.388271	0.0153327
CCND1-201	CCND1	ENST00000227507.2_1	chr11:69455855-69469242	+	0.355253	0.00154613
AC104836.1-202	AC104836.1	ENST00000636805.1_2	chr1:92545862-92650282	+	0.350287	0.00478132
NMT1-213	NMT1	ENST00000592782.5_1	chr17:43128978-43186384	+	0.335319	0.0408826
ZBTB38-201	ZBTB38	ENST00000321464.6_1	chr3:141161231-141164818	+	0.331932	0.0100637
TRIM24-201	TRIM24	ENST00000343526.8_1	chr7:138145079-138274738	+	0.308374	0.0445832
LRP12-201	LRP12	ENST00000276654.9_1	chr8:105501478-105601234	-	0.305767	0.0483799
DUSP4-201	DUSP4	ENST00000240100.6_1	chr8:29190581-29208185	-	0.293603	0.0294252
RPS27-201	RPS27	ENST00000368567.4_1	chr1:153963235-153964626	+	0.244014	0.0121474
OR11G2-203	OR11G2	ENST00000641879.1_1	chr14:20659053-20669234	+	0.240962	0.0453832
RHOG-201	RHOG	ENST00000351018.4_1	chr11:3848208-3862213	-	0.22688	0.0162461
SYT13-201	SYT13	ENST00000020926.7_1	chr11:45261852-45307870	-	0.224445	0.0125571
ATMIN-206	ATMIN	ENST00000566488.1_1	chr16:81074130-81080951	+	0.205174	0.00236614
INHBA-201	INHBA	ENST00000242208.4_1	chr7:41724712-41742706	-	0.20497	0.0417028
SRSF3-202	SRSF3	ENST00000373715.10_1	chr6:36562145-36573377	+	0.191175	0.0245142
NEXN-201	NEXN	ENST00000330010.12_1	chr1:78354200-78409576	+	0.186492	0.0165898
UBAP2L-201	UBAP2L	ENST00000271877.11_2	chr1:154193325-154243985	+	0.178802	0.00314968
CEP131-201	CEP131	ENST00000269392.8_2	chr17:79163396-79196799	-	0.169524	0.000176793
AP4S1-211	AP4S1	ENST00000616371.4_3	chr14:31495849-31565655	+	0.162951	0.0480521
RPS9-201	RPS9	ENST00000302907.8_1	chr19:54704610-54711515	+	0.155444	0.0402692
RFX5-201	RFX5	ENST00000290524.8_2	chr1:151313116-151319727	-	0.154679	0.00987362
ZBTB2-201	ZBTB2	ENST00000325144.4_1	chr6:151685252-151712683	-	0.141683	0.0101766
IER3-202	IER3	ENST00000376377.2_1	chr6:30710976-30712325	-	0.122063	0.00632106
RARS2-201	RARS2	ENST00000369536.9_1	chr6:88224096-88299721	-	0.106682	0.0479048
UBC-201	UBC	ENST00000339647.5_1	chr12:125396194-125399693	-	0.0827202	0.0412389
FN1-203	FN1	ENST00000354785.8_3	chr2:216225177-216300895	-	0.0808248	0.0385795
HNRNPK-204	HNRNPK	ENST00000376263.7_1	chr9:86582999-86595184	-	0.0729469	0.00686493
KIF2A-201	KIF2A	ENST00000381103.6_1	chr5:61602078-61682210	+	0.0723217	0.0088351
POLR2F-205	POLR2F	ENST00000442738.6_1	chr22:38349670-38365319	+	0.0599481	0.0116213
RPS20-211	RPS20	ENST00000524349.5_1	chr8:56985601-56987065	-	0.052977	0.017161
SERF2-201	SERF2	ENST00000249786.8_3	chr15:44084040-44086793	+	0.0479562	0.0363516
RPL23-207	RPL23	ENST00000577407.5_1	chr17:37006367-37009990	-	0.0466619	0.0175789
RAN-212	RAN	ENST00000543796.5_2	chr12:131356424-131362223	+	0.0417203	0.0251398
FLNA-207	FLNA	ENST00000422373.5_1	chrX:153576900-153603006	-	0.0400947	0.020764
FERMT3-201	FERMT3	ENST00000279227.9_2	chr11:63974206-63991354	+	0.037424	0.000438832

## Sheet: Type 2 vs Type 3
Supplementary Table S2 List of differentially expressed mRNAs between different HSPN types
Trans_Name	Gene name	Track_id	Locus	Strand	Fold change	p_value
HSPA8-208	HSPA8	ENST00000526686.1_1	chr11:122928587-122929805	-	80.1103	0.0224546
SH3GL1-201	SH3GL1	ENST00000269886.7_1	chr19:4360367-4400544	-	32.6944	0.00470718
GRK5-202	GRK5	ENST00000392870.2_1	chr10:120967101-121215131	+	26.8474	0.0290078
RPS17-201	RPS17	ENST00000330244.10_1	chr15:83205504-83209315	-	23.0952	0.000690634
TNFRSF13C-201	TNFRSF13C	ENST00000291232.4_2	chr22:42318027-42322822	-	20.9932	0.0475177
BRD2-201	BRD2	ENST00000374825.8_1	chr6:32936437-32949282	+	19.5057	0.00523353
PPP1CA-201	PPP1CA	ENST00000312989.11_1	chr11:67165654-67169264	-	15.4783	0.00796788
BTK-210	BTK	ENST00000621635.4_1	chrX:100604435-100645784	-	15.0124	0.0272561
SVIL-202	SVIL	ENST00000375398.6_1	chr10:29746277-29923901	-	13.8115	0.0190917
HEATR3-201	HEATR3	ENST00000299192.7_1	chr16:50099852-50140298	+	10.9255	0.0191607
RPS2-203	RPS2	ENST00000526586.6_1	chr16:2012062-2013257	-	9.4515	0.0441576
PNKD-203	PNKD	ENST00000273077.8_1	chr2:219135208-219211516	+	8.65258	0.0151343
LAMP2-202	LAMP2	ENST00000371335.4_1	chrX:119570349-119603161	-	8.22662	0.0236823
BTG2-201	BTG2	ENST00000290551.4_1	chr1:203274664-203278730	+	7.33061	0.0494433
MMP10-201	MMP10	ENST00000279441.8_1	chr11:102641234-102651359	-	6.46115	0.0108473
COTL1-201	COTL1	ENST00000262428.4_1	chr16:84599200-84651683	-	6.41735	0.00228928
ARPC2-201	ARPC2	ENST00000295685.14_1	chr2:219081933-219119079	+	6.35805	0.0454099
F3-201	F3	ENST00000334047.11_1	chr1:94994781-95007356	-	4.97507	0.0295505
ILK-202	ILK	ENST00000396751.6_1	chr11:6625046-6632101	+	4.56473	0.014826
TMEM203-201	TMEM203	ENST00000343666.5_1	chr9:140098534-140100090	-	3.84652	0.00359336
UBC-205	UBC	ENST00000536769.1_1	chr12:125396150-125399894	-	3.76345	0.00976865
GRB2-203	GRB2	ENST00000392562.5_1	chr17:73314157-73401567	-	3.42829	0.016147
KREMEN1-202	KREMEN1	ENST00000400335.8_1	chr22:29469066-29542808	+	3.37787	0.0410952
NT5E-203	NT5E	ENST00000369651.7_1	chr6:86159302-86205509	+	3.06587	0.0208878
OAS2-203	OAS2	ENST00000449768.2_1	chr12:113416287-113426610	+	2.90982	0.000494147
ZDHHC3-201	ZDHHC3	ENST00000296127.7_1	chr3:44966338-45017674	-	2.64722	0.0164211
HERC6-203	HERC6	ENST00000380265.9_1	chr4:89299891-89364249	+	2.63993	0.0189097
MIEF1-201	MIEF1	ENST00000325301.6_3	chr22:39898358-39914137	+	2.41929	0.00159027
WWOX-214	WWOX	ENST00000566780.5_1	chr16:78133310-79246564	+	2.41107	0.0272108
PEX19-201	PEX19	ENST00000368072.9_1	chr1:160246602-160254936	-	2.37866	0.0488273
PSMD12-201	PSMD12	ENST00000356126.7_1	chr17:65334032-65362743	-	2.35772	0.0462716
FANCL-202	FANCL	ENST00000402135.7_1	chr2:58386382-58468485	-	2.06596	0.0401209
ADAMTS1-201	ADAMTS1	ENST00000284984.7_1	chr21:28208066-28217728	-	2.02259	0.0358797
ATP9A-202	ATP9A	ENST00000338821.5_2	chr20:50213053-50385173	-	1.91147	0.0347573
IL1R1-205	IL1R1	ENST00000410023.5_1	chr2:102759246-102796334	+	1.8867	0.00902971
KLHL8-201	KLHL8	ENST00000273963.9_1	chr4:88081255-88141760	-	1.80501	0.00952444
ATP5G3-201	ATP5G3	ENST00000284727.8_1	chr2:176040986-176049335	-	1.77958	0.0236857
ABI2-204	ABI2	ENST00000295851.9_2	chr2:204192942-204312446	+	0.632293	0.00499604
TRABD2B-202	TRABD2B	ENST00000606738.2_1	chr1:48226200-48462567	-	0.579814	0.0024944
DIP2B-201	DIP2B	ENST00000301180.9_1	chr12:50898890-51142450	+	0.557638	0.022221
OTUD4-202	OTUD4	ENST00000454497.6_1	chr4:146054801-146100832	-	0.526042	0.0182101
MYH7B-201	MYH7B	ENST00000262873.11_1	chr20:33563206-33590240	+	0.503744	0.0213547
NRDE2-201	NRDE2	ENST00000354366.7_1	chr14:90734200-90798481	-	0.49294	0.0322976
INTS2-202	INTS2	ENST00000444766.7_1	chr17:59942731-60005377	-	0.488422	0.0369889
RRM2-202	RRM2	ENST00000360566.6_1	chr2:10262455-10271545	+	0.480249	0.00420803
AGO2-201	AGO2	ENST00000220592.9_2	chr8:141530255-141645718	-	0.480171	0.0277413
TXNL4A-201	TXNL4A	ENST00000269601.9_1	chr18:77730811-77748593	-	0.449773	0.000241494
SUMO2-202	SUMO2	ENST00000420826.6_1	chr17:73161681-73179078	-	0.428863	0.00343005
POLR1A-201	POLR1A	ENST00000263857.10_1	chr2:86247339-86333278	-	0.421874	0.00622608
CUX2-201	CUX2	ENST00000261726.10_1	chr12:111471828-111788358	+	0.414202	0.0409394
WDR7-201	WDR7	ENST00000254442.7_1	chr18:54318616-54703837	+	0.3983	0.0281279
DNTTIP2-202	DNTTIP2	ENST00000436063.6_1	chr1:94331839-94344762	-	0.387601	0.0347047
GTF2H3-212	GTF2H3	ENST00000543341.6_1	chr12:124118376-124147153	+	0.37504	0.00885257
SETD5-203	SETD5	ENST00000402198.5_1	chr3:9439403-9519838	+	0.364443	0.041501
SETX-201	SETX	ENST00000224140.5_1	chr9:135136743-135230372	-	0.35119	0.0203036
CCAR2-201	CCAR2	ENST00000308511.8_1	chr8:22462145-22479027	+	0.343945	0.0399492
EID1-201	EID1	ENST00000530028.2_2	chr15:49170083-49172380	+	0.343476	0.00161001
FUT8-203	FUT8	ENST00000360689.9_1	chr14:65877310-66210839	+	0.339998	0.0433104
POLR2J2-202	POLR2J2	ENST00000358438.6_1	chr7:102305815-102312076	-	0.338765	0.0136129
ARHGEF11-202	ARHGEF11	ENST00000368194.7_1	chr1:156904632-157015162	-	0.335844	0.00918273
C5AR2-201	C5AR2	ENST00000595464.2_2	chr19:47835404-47850584	+	0.333445	0.0320014
MGAT4A-201	MGAT4A	ENST00000264968.7_1	chr2:99235569-99343159	-	0.329915	0.0140171
PRPF38A-201	PRPF38A	ENST00000257181.9_1	chr1:52870236-52886511	+	0.324985	0.0271105
COX10-201	COX10	ENST00000261643.7_1	chr17:13972846-14111994	+	0.322825	0.0173326
NUS1-201	NUS1	ENST00000368494.3_1	chr6:117996665-118031803	+	0.314323	0.0308723
SIK2-201	SIK2	ENST00000304987.3_1	chr11:111473115-111601577	+	0.313815	0.0310255
USP7-201	USP7	ENST00000344836.8_1	chr16:8985951-9057341	-	0.312715	0.0484856
TNFAIP8-206	TNFAIP8	ENST00000504771.2_1	chr5:118690009-118735383	+	0.312083	0.0137116
AC104836.1-202	AC104836.1	ENST00000636805.1_2	chr1:92545862-92650282	+	0.311151	0.00142769
TXNDC12-201	TXNDC12	ENST00000371626.8_1	chr1:52485803-52521843	-	0.300203	0.0110489
MLXIP-001	MLXIP	ENST00000319080.7	chr12:122516628-122631894	+	0.293167	0.0255028
VPS33A-201	VPS33A	ENST00000267199.8_1	chr12:122714111-122751068	-	0.287741	0.0172878
SSR3-201	SSR3	ENST00000265044.6_1	chr3:156257929-156272973	-	0.286387	0.0443893
RAB10-201	RAB10	ENST00000264710.4_1	chr2:26256979-26360323	+	0.280755	0.0227731
NPM1-201	NPM1	ENST00000296930.9_1	chr5:170814652-170838141	+	0.279334	0.0365484
ELOA3B-201	ELOA3B	ENST00000611323.1_1	chr18:44549424-44550298	-	0.278784	0.043698
ELK4-202	ELK4	ENST00000357992.8_1	chr1:205577071-205601090	-	0.278616	0.0174217
FBXO3-208	FBXO3	ENST00000530401.5_1	chr11:33762511-33796064	-	0.277925	0.020852
POGZ-201	POGZ	ENST00000271715.6_2	chr1:151375200-151431941	-	0.277607	0.023071
SYNRG-217	SYNRG	ENST00000612223.4_1	chr17:35874900-35969544	-	0.274937	0.00288354
INTS1-201	INTS1	ENST00000404767.7_1	chr7:1509913-1544003	-	0.273322	0.044235
ECHDC1-222	ECHDC1	ENST00000531967.5_1	chr6:127609857-127664020	-	0.263107	0.00508567
ZMAT3-201	ZMAT3	ENST00000311417.6_1	chr3:178735011-178790067	-	0.2595	0.0423842
PDCD4-202	PDCD4	ENST00000393104.6_1	chr10:112631553-112659763	+	0.258454	0.0329483
TTC3-204	TTC3	ENST00000399017.6_1	chr21:38453896-38575413	+	0.249173	0.008504
LRP12-201	LRP12	ENST00000276654.9_1	chr8:105501478-105601234	-	0.245739	0.0315509
PPIG-201	PPIG	ENST00000260970.7_1	chr2:170440850-170497916	+	0.24492	0.0226564
AC083902.2-201	AC083902.2	ENST00000511828.1_1	chr4:100557686-100575805	-	0.243159	0.0298861
IFI44L-201	IFI44L	ENST00000370751.9_1	chr1:79086088-79111830	+	0.239932	0.021275
GK-207	GK	ENST00000427190.5_1	chrX:30671476-30749573	+	0.239403	0.0105264
LANCL1-205	LANCL1	ENST00000443314.5_1	chr2:211295973-211341463	-	0.238187	0.0059979
ABI1-207	ABI1	ENST00000376142.6_2	chr10:27035522-27149864	-	0.237036	0.018529
PIK3CA-201	PIK3CA	ENST00000263967.3_1	chr3:178866311-178957881	+	0.231003	0.00615312
PHACTR4-202	PHACTR4	ENST00000373839.7_1	chr1:28696114-28826881	+	0.229762	0.000579
CCNG2-201	CCNG2	ENST00000316355.9_1	chr4:78078304-78091212	+	0.229743	0.0130132
PCNT-201	PCNT	ENST00000359568.9_1	chr21:47744036-47865682	+	0.227977	0.0238246
MOB4-202	MOB4	ENST00000323303.8_1	chr2:198380556-198418423	+	0.226743	0.0163219
RRP1B-201	RRP1B	ENST00000340648.5_1	chr21:45079429-45115960	+	0.225717	0.0328142
SYT13-201	SYT13	ENST00000020926.7_1	chr11:45261852-45307870	-	0.224445	0.0125571
ZBTB38-201	ZBTB38	ENST00000321464.6_1	chr3:141161231-141164818	+	0.221827	0.00732549
OGFRL1-201	OGFRL1	ENST00000370435.4_1	chr6:71998506-72018653	+	0.220978	0.0400816
DENND3-211	DENND3	ENST00000519811.5_3	chr8:142138737-142205907	+	0.217714	0.0359362
OR11G2-203	OR11G2	ENST00000641879.1_1	chr14:20659053-20669234	+	0.216714	0.0269921
BAG5-203	BAG5	ENST00000445922.2_1	chr14:104022882-104028655	-	0.215069	0.0139022
B3GALT2-201	B3GALT2	ENST00000367434.4_1	chr1:193148175-193155784	-	0.214067	0.0415218
FYN-202	FYN	ENST00000354650.7_1	chr6:111981535-112194655	-	0.213749	0.0470285
YTHDF2-201	YTHDF2	ENST00000373812.7_2	chr1:29063271-29096287	+	0.213252	0.0389904
PHF20-203	PHF20	ENST00000374012.7_1	chr20:34359905-34538303	+	0.213221	0.0335519
UBAP2L-201	UBAP2L	ENST00000271877.11_2	chr1:154193325-154243985	+	0.210331	0.0486654
SEC22B-201	SEC22B	ENST00000578049.3_1	chr1:145096413-145118353	+	0.20963	0.0356171
EIF4E3-204	EIF4E3	ENST00000425534.7_1	chr3:71724567-71774526	-	0.209526	0.000932831
CTC1-201	CTC1	ENST00000315684.12_3	chr17:8128139-8151362	-	0.208173	0.00611525
P4HB-201	P4HB	ENST00000331483.8_1	chr17:79801035-79818570	-	0.206502	7.1261e-05
MAGEF1-201	MAGEF1	ENST00000317897.4_1	chr3:184428155-184429790	-	0.202281	0.047373
CXXC5-201	CXXC5	ENST00000302517.7_1	chr5:139027877-139063467	+	0.201818	0.0150905
IBTK-201	IBTK	ENST00000306270.11_1	chr6:82879700-82957471	-	0.201803	0.0175877
DCAF5-201	DCAF5	ENST00000341516.9_1	chr14:69517598-69619843	-	0.19848	0.0404504
LCOR-205	LCOR	ENST00000421806.3_4	chr10:98592055-98755716	+	0.195507	0.0144939
UBL3-201	UBL3	ENST00000380680.4_1	chr13:30338508-30424821	-	0.189821	0.0152198
SPRY1-207	SPRY1	ENST00000610581.4_1	chr4:124317950-124324915	+	0.186734	0.00997849
SMARCC1-201	SMARCC1	ENST00000254480.9_1	chr3:47626762-47823407	-	0.186165	0.00293099
RAB7A-201	RAB7A	ENST00000265062.7_1	chr3:128444965-128533639	+	0.182215	0.0430508
AC004706.4-201	AC004706.4	ENST00000634965.1_1	chr17:6540100-6543636	-	0.181171	0.0471694
AC106774.7-201	AC106774.7	ENST00000638408.1_1	chr5:17521910-17522506	+	0.176161	0.0285099
SH3GLB1-205	SH3GLB1	ENST00000616170.4_1	chr1:87170253-87213859	+	0.173663	0.00307899
MT-CO2-201	MT-CO2	ENST00000361739.1	chrM:7586-8269	+	0.171101	0.0174066
PSMD3-201	PSMD3	ENST00000264639.8_1	chr17:38137050-38154213	+	0.167716	0.00788371
LYPLA2-205	LYPLA2	ENST00000374514.7_1	chr1:24117460-24122029	+	0.167218	0.0304533
ABHD2-201	ABHD2	ENST00000352732.9_1	chr15:89631381-89745591	+	0.165765	0.0482555
MAP3K3-201	MAP3K3	ENST00000361357.7_1	chr17:61699802-61773663	+	0.163811	0.0103296
DDX54-202	DDX54	ENST00000314045.11_1	chr12:113594979-113623284	-	0.161468	0.0173625
AC106774.6-201	AC106774.6	ENST00000638483.1_1	chr5:17525344-17525940	+	0.160267	0.0492495
ZFR-201	ZFR	ENST00000265069.12_1	chr5:32354456-32444867	-	0.159055	0.0352897
FFAR2-201	FFAR2	ENST00000246549.2_1	chr19:35940617-35942667	+	0.156781	0.0211545
CEP350-202	CEP350	ENST00000367607.7_2	chr1:179923873-180084015	+	0.155995	0.0222977
ARPC5L-202	ARPC5L	ENST00000353214.6_1	chr9:127624409-127640012	+	0.151914	0.0498042
NEK9-201	NEK9	ENST00000238616.9_1	chr14:75546056-75593783	-	0.151487	0.0487832
ADAR-202	ADAR	ENST00000368474.8_1	chr1:154554538-154580682	-	0.150986	0.0278682
CEP131-201	CEP131	ENST00000269392.8_2	chr17:79163396-79196799	-	0.148884	7.6555e-05
SAFB-201	SAFB	ENST00000292123.9_1	chr19:5623110-5668489	+	0.144456	0.040153
CD164-202	CD164	ENST00000310786.8_1	chr6:109687721-109703647	-	0.143487	0.0131136
NEXN-201	NEXN	ENST00000330010.12_1	chr1:78354200-78409576	+	0.142205	0.00725278
MT-ND4L-201	MT-ND4L	ENST00000361335.1	chrM:10470-10766	+	0.140595	0.0314088
DLD-201	DLD	ENST00000205402.9_1	chr7:107531415-107561648	+	0.139309	0.0395621
STX7-202	STX7	ENST00000367941.6_1	chr6:132767006-132834201	-	0.13603	0.0353591
FAM49B-215	FAM49B	ENST00000519824.6_1	chr8:130851839-130952078	-	0.131595	0.023248
JCAD-201	JCAD	ENST00000375377.1_1	chr10:30301729-30348453	-	0.131566	0.00261041
ATF6B-209	ATF6B	ENST00000375201.8_1	chr6:32083041-32096030	-	0.131561	0.00166644
WAPL-202	WAPL	ENST00000298767.9_1	chr10:88195013-88281572	-	0.129307	0.00891109
AP4S1-211	AP4S1	ENST00000616371.4_3	chr14:31495849-31565655	+	0.125424	0.0300705
TXNL4B-201	TXNL4B	ENST00000268483.7_1	chr16:72118752-72127550	-	0.124795	0.0169387
RBM8A-204	RBM8A	ENST00000583313.6_1	chr1:145507557-145513536	+	0.124271	0.00895583
MT-ND4-201	MT-ND4	ENST00000361381.2	chrM:10760-12137	+	0.124044	0.0128395
ZBTB2-201	ZBTB2	ENST00000325144.4_1	chr6:151685252-151712683	-	0.113578	0.00856261
PHF1-202	PHF1	ENST00000374516.7_2	chr6:33378738-33384230	+	0.113333	0.000157298
STRADB-201	STRADB	ENST00000194530.7_1	chr2:202316392-202345569	+	0.108319	0.0120277
SERF2-201	SERF2	ENST00000249786.8_3	chr15:44084040-44086793	+	0.106787	0.00687891
RAD21-201	RAD21	ENST00000297338.6_1	chr8:117858174-117887105	-	0.105101	0.0148113
MT-ATP6-201	MT-ATP6	ENST00000361899.2	chrM:8527-9207	+	0.105048	0.0496037
PTEN-201	PTEN	ENST00000371953.7_1	chr10:89622870-89731687	+	0.10299	0.0403822
HMGB2-201	HMGB2	ENST00000296503.9_1	chr4:174252846-174256276	-	0.101557	0.0265834
REXO1L1-001	REXO1L1	ENST00000379010.2	chr8:86568695-86575726	-	0.0996849	0.0050403
PTPRC-209	PTPRC	ENST00000442510.6_2	chr1:198608170-198726412	+	0.099222	0.0397744
FCMR-201	FCMR	ENST00000367091.7_1	chr1:207077731-207095343	-	0.0856412	0.000829154
CD63-208	CD63	ENST00000549117.5_1	chr12:56119266-56123491	-	0.0806306	0.0283723
RFX5-201	RFX5	ENST00000290524.8_2	chr1:151313116-151319727	-	0.0805504	0.00116363
RHOQ-201	RHOQ	ENST00000238738.8_1	chr2:46769867-46810260	+	0.0804718	0.0121976
RARS2-201	RARS2	ENST00000369536.9_1	chr6:88224096-88299721	-	0.0781076	0.0250895
DDX60-201	DDX60	ENST00000393743.7_1	chr4:169137444-169239958	-	0.0752822	0.0122541
UBC-213	UBC	ENST00000546120.2_1	chr12:125396250-125399147	-	0.0740957	0.0411088
CCT6A-201	CCT6A	ENST00000275603.8_1	chr7:56119323-56131682	+	0.0718399	0.0106925
KARS-202	KARS	ENST00000319410.9_1	chr16:75661372-75681563	-	0.0717488	0.00137041
SMOX-212	SMOX	ENST00000621355.4_1	chr20:4129426-4168393	+	0.0697547	0.0178866
STX11-201	STX11	ENST00000367568.4_1	chr6:144471663-144509507	+	0.0561456	0.00104167
RAN-212	RAN	ENST00000543796.5_2	chr12:131356424-131362223	+	0.0478171	0.0313203
RPL23-207	RPL23	ENST00000577407.5_1	chr17:37006367-37009990	-	0.0301641	0.0148934
PTK2B-203	PTK2B	ENST00000397501.5_1	chr8:27168999-27316907	+	0.0295215	0.0270707
GTF3C6-201	GTF3C6	ENST00000329970.7_1	chr6:111279763-111289093	+	0.0223945	0.0405547
MYL12B-201	MYL12B	ENST00000237500.9_1	chr18:3261907-3278282	+	0.00732805	0.00129633
