# Supplementary material for: An Integrated Transcriptomic and Proteomic Analysis Identifies Significant Novel Pathways for Henoch-Schönlein Purpura Nephritis Progression
Source: Biomed Res Int. 2020 Jun 19;2020:2489175. doi: 10.1155/2020/2489175 (PMC7322592; doi:10.1155/2020/2489175)
Supplement: Supplementary Materials — .Supplementary Figure S1: images of renal pathological sections of HSPN patients. (A) Type 1. (B) Type 2. (C) Type 3. Supplementary Figure S2: PCA score plots for discriminating samples within the different groups. Supplementary Figure S3: correlation analysis of differentially expressed mRNAs and proteins between different types of HSPN. Supplementary Table S1: list of quantitated 24,493 mRNAs and 592 proteins. Supplementary Table S2: list of differentially expressed mRNAs between different HSPN types. Supplementary Table S3: list of differentially expressed proteins between different HSPN types. Supplementary Table S4: list of DEGs which were differentially expressed between HSPN type 1 and HSPN type 2 and HSPN type 2 and HSPN type 3. Supplementary Table S5: the significant pathways enriched by DEGs between different HSPN types. Supplementary Table S6: the correlation coefficients between differentially expressed genes in four pathways and clinical biochemical indicators. Supplementary Table S7: list of mRNAs and proteins selected for validation. Supplementary Table S8: the significant pathways enriched by downregulated DEGs between HSP and HSPN. Supplementary Table S9: list of differentially expressed mRNAs between HSP and HSPN. Supplementary Table S10: the differentially expressed genes in four pathways negative regulation of the JAK-STAT cascade and so on. [file 2489175.f1.zip › Supplementary Table S3.xlsx]

## Sheet: Type 1 vs Type 2
Supplementary Table S3 List of differentially expressed proteins between different HSPN types
Protein name	Gene name	ENTREZID	Chromosomal location	Fold change	p_value
P53-Responsive Gene 1	PRG1	5552	chr19:43349056-43349548	4.46823	0.0168919
Chemokine (C-C motif) ligand 5	CCL5	6352	chr17:35871491-35880793	3.80534	0.00608108
RAN, member RAS oncogene family	RAN	5901	chr12:130871879-130877678	2.83347	0.0300676
Chemokine (C-C motif) ligand 18	CCL18	6362	chr17:36064272-36072032	2.81031	0.0337838
Transforming growth factor, beta 1	TGFB1	7040	chr19:41301587-41353933	2.58783	0.00692568
Pro-platelet basic protein (chemokine (C-X-C motif) ligand 7)	PPBP	5473	chr4:73986439-73988197	2.53967	0.0173986
Latent transforming growth factor beta binding protein 1	LTBP1	4052	chr2:32946972-33399509	2.52951	0.00760135
Multimerin 1	MMRN1	22915	chr4:89879532-89954629	1.9406	0.0363176
Superoxide dismutase 3	SOD3	6649	chr4:24789912-24800845	1.9098	0.0109797
Vascular endothelial growth factor C	VEGFC	7424	chr4:176683534-176792745	1.73902	0.0385135
Ficolin (collagen/fibrinogen domain containing) 1	FCN1	2219	chr9:134905890-134917963	1.62812	0.0185811
Matrix Gla protein	MGP	4256	chr12:14881181-14885926	0.636259	0.0496622
Coagulation factor XIII	F13A1	2162	chr6:6144078-6321013	0.600482	0.041723
-	B7Z1F8	-	-	0.524987	0.0141892
Lipoprotein(A)	LPA	4018	chr6:160531483-160666375	0.382609	0.000337838
Inhibin, beta E	INHBE	83729	chr12:57452323-57459280	0.33226	0.00523649

## Sheet: Type 1 vs Type 3
Supplementary Table S3 List of differentially expressed proteins between different HSPN types
Protein name	Gene names	ENTREZID	Chromosomal location	Fold change	p_value
Chemokine (C-C motif) ligand 5	CCL5	6352	chr17:35871491-35880793	3.80534	0.00608108
Transforming growth factor, beta 1	TGFB1	7040	chr19:41301587-41353933	2.19766	0.033277
Latent transforming growth factor beta binding protein 1	LTBP1	4052	chr2:32946972-33399509	2.19695	0.028716
Multimerin 1	MMRN1	22915	chr4:89879532-89954629	1.973	0.019088
Superoxide dismutase 3	SOD3	6649	chr4:24789912-24800845	1.8748	0.021622
Ficolin (collagen/fibrinogen domain containing) 1	FCN1	2219	chr9:134905890-134917963	1.81188	0.019932
Inhibin, beta E	INHBE	83729	chr12:57452323-57459280	0.394467	0.046622
Lipoprotein(A)	LPA	4018	chr6:160531483-160666375	0.382609	0.000337838

## Sheet: Type 2 vs Type 3
Supplementary Table S3 List of differentially expressed proteins between different HSPN types
Protein name	Gene names	ENTREZID	Chromosomal location	Fold change	p_value
-	S6C4Q9	-	-	1.80598	0.027534
Cholesteryl ester transfer protein, plasma	CETP	1071	chr16:56961850-56983845	1.57707	0.020608
Matrix metallopeptidase 2 (gelatinase A, 72kDa gelatinase, 72kDa type IV collagenase)	MMP2	4313	chr16:55389700-55506691	0.657361	0.04375
Lumican	LUM	4060	chr12:91102629-91111831	0.629382	0.03598
Chemokine (C-C motif) ligand 18	CCL18	6362	chr17:36064272-36072032	0.610385	0.005574
Mannose-binding lectin (protein C) 2, soluble	MBL2	4153	chr10:52765380-52772841	0.506324	0.011655
