# Supplementary material for: An Integrated Transcriptomic and Proteomic Analysis Identifies Significant Novel Pathways for Henoch-Schönlein Purpura Nephritis Progression
Source: Biomed Res Int. 2020 Jun 19;2020:2489175. doi: 10.1155/2020/2489175 (PMC7322592; doi:10.1155/2020/2489175)
Supplement: Supplementary Materials — .Supplementary Figure S1: images of renal pathological sections of HSPN patients. (A) Type 1. (B) Type 2. (C) Type 3. Supplementary Figure S2: PCA score plots for discriminating samples within the different groups. Supplementary Figure S3: correlation analysis of differentially expressed mRNAs and proteins between different types of HSPN. Supplementary Table S1: list of quantitated 24,493 mRNAs and 592 proteins. Supplementary Table S2: list of differentially expressed mRNAs between different HSPN types. Supplementary Table S3: list of differentially expressed proteins between different HSPN types. Supplementary Table S4: list of DEGs which were differentially expressed between HSPN type 1 and HSPN type 2 and HSPN type 2 and HSPN type 3. Supplementary Table S5: the significant pathways enriched by DEGs between different HSPN types. Supplementary Table S6: the correlation coefficients between differentially expressed genes in four pathways and clinical biochemical indicators. Supplementary Table S7: list of mRNAs and proteins selected for validation. Supplementary Table S8: the significant pathways enriched by downregulated DEGs between HSP and HSPN. Supplementary Table S9: list of differentially expressed mRNAs between HSP and HSPN. Supplementary Table S10: the differentially expressed genes in four pathways negative regulation of the JAK-STAT cascade and so on. [file 2489175.f1.zip › Supplementary Table S4.xlsx]

## Sheet: Sheet1
Supplementary Table S4 List of DEGs which were differentially expressed between HSPN Type 1 and HSPN Type 2, HSPN Type 2 and HSPN Type 3
Gene name	Category	Patterns of DEGs change from type 1 to type 3
RPS17-201	mRNA	Continuously down-regulated
CCL18	protein	First down-regulated and then up-regulated
WDR7-201	mRNA	First down-regulated and then up-regulated
USP7-201	mRNA	First down-regulated and then up-regulated
UBL3-201	mRNA	First down-regulated and then up-regulated
TXNL4B-201	mRNA	First down-regulated and then up-regulated
TXNDC12-201	mRNA	First down-regulated and then up-regulated
TNFAIP8-206	mRNA	First down-regulated and then up-regulated
STX7-202	mRNA	First down-regulated and then up-regulated
STX11-201	mRNA	First down-regulated and then up-regulated
STRADB-201	mRNA	First down-regulated and then up-regulated
SMARCC1-201	mRNA	First down-regulated and then up-regulated
SETX-201	mRNA	First down-regulated and then up-regulated
SETD5-203	mRNA	First down-regulated and then up-regulated
SAFB-201	mRNA	First down-regulated and then up-regulated
RRP1B-201	mRNA	First down-regulated and then up-regulated
RHOQ-201	mRNA	First down-regulated and then up-regulated
RAD21-201	mRNA	First down-regulated and then up-regulated
RAB10-201	mRNA	First down-regulated and then up-regulated
PTPRC-209	mRNA	First down-regulated and then up-regulated
PTK2B-203	mRNA	First down-regulated and then up-regulated
PSMD3-201	mRNA	First down-regulated and then up-regulated
PRPF38A-201	mRNA	First down-regulated and then up-regulated
POLR1A-201	mRNA	First down-regulated and then up-regulated
PDCD4-202	mRNA	First down-regulated and then up-regulated
PCNT-201	mRNA	First down-regulated and then up-regulated
P4HB-201	mRNA	First down-regulated and then up-regulated
NRDE2-201	mRNA	First down-regulated and then up-regulated
NEK9-201	mRNA	First down-regulated and then up-regulated
MLXIP-001	mRNA	First down-regulated and then up-regulated
LYPLA2-205	mRNA	First down-regulated and then up-regulated
KARS-202	mRNA	First down-regulated and then up-regulated
JCAD-201	mRNA	First down-regulated and then up-regulated
INTS1-201	mRNA	First down-regulated and then up-regulated
HMGB2-201	mRNA	First down-regulated and then up-regulated
FUT8-203	mRNA	First down-regulated and then up-regulated
FFAR2-201	mRNA	First down-regulated and then up-regulated
FCMR-201	mRNA	First down-regulated and then up-regulated
ELK4-202	mRNA	First down-regulated and then up-regulated
EIF4E3-204	mRNA	First down-regulated and then up-regulated
EID1-201	mRNA	First down-regulated and then up-regulated
ECHDC1-222	mRNA	First down-regulated and then up-regulated
DENND3-211	mRNA	First down-regulated and then up-regulated
DDX54-202	mRNA	First down-regulated and then up-regulated
DCAF5-201	mRNA	First down-regulated and then up-regulated
CXXC5-201	mRNA	First down-regulated and then up-regulated
CTC1-201	mRNA	First down-regulated and then up-regulated
CEP350-202	mRNA	First down-regulated and then up-regulated
CCT6A-201	mRNA	First down-regulated and then up-regulated
ATF6B-209	mRNA	First down-regulated and then up-regulated
ARHGEF11-202	mRNA	First down-regulated and then up-regulated
AC106774.7-201	mRNA	First down-regulated and then up-regulated
PNKD-203	mRNA	First up-regulated and then down-regulated
BRD2-201	mRNA	First up-regulated and then down-regulated
FANCL-202	mRNA	First up-regulated and then down-regulated
HEATR3-201	mRNA	First up-regulated and then down-regulated
GRK5-202	mRNA	First up-regulated and then down-regulated
MMP10-201	mRNA	First up-regulated and then down-regulated
NT5E-203	mRNA	First up-regulated and then down-regulated
