# Supplementary material for: An Integrated Transcriptomic and Proteomic Analysis Identifies Significant Novel Pathways for Henoch-Schönlein Purpura Nephritis Progression
Source: Biomed Res Int. 2020 Jun 19;2020:2489175. doi: 10.1155/2020/2489175 (PMC7322592; doi:10.1155/2020/2489175)
Supplement: Supplementary Materials — .Supplementary Figure S1: images of renal pathological sections of HSPN patients. (A) Type 1. (B) Type 2. (C) Type 3. Supplementary Figure S2: PCA score plots for discriminating samples within the different groups. Supplementary Figure S3: correlation analysis of differentially expressed mRNAs and proteins between different types of HSPN. Supplementary Table S1: list of quantitated 24,493 mRNAs and 592 proteins. Supplementary Table S2: list of differentially expressed mRNAs between different HSPN types. Supplementary Table S3: list of differentially expressed proteins between different HSPN types. Supplementary Table S4: list of DEGs which were differentially expressed between HSPN type 1 and HSPN type 2 and HSPN type 2 and HSPN type 3. Supplementary Table S5: the significant pathways enriched by DEGs between different HSPN types. Supplementary Table S6: the correlation coefficients between differentially expressed genes in four pathways and clinical biochemical indicators. Supplementary Table S7: list of mRNAs and proteins selected for validation. Supplementary Table S8: the significant pathways enriched by downregulated DEGs between HSP and HSPN. Supplementary Table S9: list of differentially expressed mRNAs between HSP and HSPN. Supplementary Table S10: the differentially expressed genes in four pathways negative regulation of the JAK-STAT cascade and so on. [file 2489175.f1.zip › Supplementary Table S5.xlsx]

## Sheet: total_up
Supplementary Table S5 The significant pathways enriched by DEGs between different HSPN types
Category	ID	Description	GeneRatio	BgRatio	pvalue	FDR	geneID	Count
GOTERM_BP	GO:0002446	neutrophil mediated immunity	67/1221	499/18493	2.12261e-08	1.68712e-05	2495/226/203068/25801/2207/1265/10970/3577/5788/10890/5870/9948/11314/823/1604/6845/9725/23218/3101/51646/6868/84329/10577/10383/22918/27180/2588/3614/7077/2950/8778/2683/9535/23526/1315/8895/5265/23250/4860/25852/51382/2548/5049/116844/8694/613/4831/1778/10396/79888/3163/124583/5709/7226/10213/126014/5713/23593/5795/5236/23406/1774/3146/81619/401258/5473/2219	67
GOTERM_BP	GO:0043312	neutrophil degranulation	65/1221	485/18493	3.70923e-08	2.09148e-05	2495/226/203068/25801/2207/1265/10970/3577/5788/10890/5870/11314/823/1604/6845/9725/23218/3101/51646/84329/10577/10383/22918/27180/2588/3614/7077/2950/8778/2683/9535/23526/1315/8895/5265/23250/4860/25852/51382/2548/5049/116844/8694/613/4831/1778/10396/79888/3163/124583/5709/7226/10213/126014/5713/23593/5795/5236/23406/1774/3146/81619/401258/5473/2219	65
GOTERM_BP	GO:0042119	neutrophil activation	66/1221	498/18493	4.49216e-08	2.09148e-05	2495/226/203068/25801/2207/1265/10970/3577/5788/10890/5870/6352/11314/823/1604/6845/9725/23218/3101/51646/84329/10577/10383/22918/27180/2588/3614/7077/2950/8778/2683/9535/23526/1315/8895/5265/23250/4860/25852/51382/2548/5049/116844/8694/613/4831/1778/10396/79888/3163/124583/5709/7226/10213/126014/5713/23593/5795/5236/23406/1774/3146/81619/401258/5473/2219	66
GOTERM_BP	GO:0002283	neutrophil activation involved in immune response	65/1221	488/18493	4.69732e-08	2.09148e-05	2495/226/203068/25801/2207/1265/10970/3577/5788/10890/5870/11314/823/1604/6845/9725/23218/3101/51646/84329/10577/10383/22918/27180/2588/3614/7077/2950/8778/2683/9535/23526/1315/8895/5265/23250/4860/25852/51382/2548/5049/116844/8694/613/4831/1778/10396/79888/3163/124583/5709/7226/10213/126014/5713/23593/5795/5236/23406/1774/3146/81619/401258/5473/2219	65
GOTERM_BP	GO:0030098	lymphocyte differentiation	47/1221	344/18493	1.66257e-06	0.000423005	3688/973/972/2207/4066/6778/5788/602/3659/3676/5971/3575/6868/9092/3707/8651/578/1236/64332/7048/2185/23240/359948/6722/677/9759/10193/472/2648/80762/51043/4860/5336/23598/10892/6654/1054/114836/54542/4853/2475/96459/6095/5795/23529/3146/7040	47
GOTERM_BP	GO:0046651	lymphocyte proliferation	36/1221	264/18493	2.76874e-05	0.00360449	6188/973/972/896/5788/8379/3659/6352/11314/1604/3575/57162/933/63925/3570/7048/3614/23240/923/5294/2000/472/80762/51043/4860/10892/5027/6654/54542/64844/3572/202309/23529/3146/931/7040	36
GOTERM_BP	GO:0070661	leukocyte proliferation	37/1221	283/18493	5.40944e-05	0.0055582	6188/973/972/896/5788/8379/3659/6352/11314/1604/3575/57162/933/63925/3570/7048/3614/23240/2950/923/5294/2000/472/80762/51043/4860/10892/5027/6654/54542/64844/3572/202309/23529/3146/931/7040	37
GOTERM_BP	GO:0042110	T cell activation	51/1221	451/18493	0.000119097	0.00994274	6188/972/896/2207/6778/5788/8379/602/3659/6352/11314/1604/5971/3575/57162/6868/9092/3707/8651/3570/1236/64332/79865/4088/7048/23240/6722/923/84941/5294/677/2000/2648/80762/51043/4860/23598/10892/5062/5027/6654/114836/9402/207/54542/2475/64844/6095/3572/3146/7040	51
GOTERM_BP	GO:0046631	alpha-beta T cell activation	21/1221	134/18493	0.000184704	0.0137066	6778/5788/602/3659/11314/1604/5971/3707/8651/3570/64332/7048/2000/51043/4860/10892/114836/54542/2475/6095/3146	21
GOTERM_BP	GO:0030183	B cell differentiation	20/1221	125/18493	0.00019576	0.0140169	3688/973/4066/5788/602/3676/6868/578/2185/359948/677/9759/472/5336/10892/1054/4853/96459/5795/23529	20
GOTERM_BP	GO:0042098	T cell proliferation	25/1221	178/18493	0.000280588	0.0164745	6188/896/5788/8379/3659/6352/1604/57162/3570/7048/23240/923/5294/2000/80762/51043/4860/10892/5027/6654/54542/64844/3572/3146/7040	25
GOTERM_BP	GO:0061082	myeloid leukocyte cytokine production	8/1221	28/18493	0.000333256	0.018743	972/2207/10417/3162/79004/23411/11213/7040	8
GOTERM_BP	GO:0030217	T cell differentiation	30/1221	234/18493	0.000371617	0.0196589	972/2207/6778/5788/602/3659/5971/3575/6868/9092/3707/8651/1236/64332/7048/23240/6722/677/2648/51043/4860/23598/10892/6654/114836/54542/2475/6095/3146/7040	30
GOTERM_BP	GO:0002285	lymphocyte activation involved in immune response	24/1221	174/18493	0.000481679	0.0227753	2207/6778/5788/602/6845/5971/64332/2185/165918/80762/51043/5336/10892/114836/54542/4853/2475/6095/164/7158/202309/23529/3146/7040	24
GOTERM_BP	GO:0046632	alpha-beta T cell differentiation	16/1221	101/18493	0.000920095	0.033048	6778/602/3659/5971/3707/8651/64332/7048/51043/4860/10892/114836/54542/2475/6095/3146	16
GOTERM_BP	GO:0002292	T cell differentiation involved in immune response	12/1221	66/18493	0.00115265	0.0364416	2207/6778/602/5971/64332/51043/10892/114836/54542/2475/6095/3146	12
GOTERM_BP	GO:0002294	CD4-positive, alpha-beta T cell differentiation involved in immune response	11/1221	59/18493	0.00147816	0.0422341	6778/602/5971/64332/51043/10892/114836/54542/2475/6095/3146	11
GOTERM_BP	GO:0035710	CD4-positive, alpha-beta T cell activation	14/1221	87/18493	0.00160933	0.044323	6778/602/1604/5971/8651/64332/7048/51043/10892/114836/54542/2475/6095/3146	14
GOTERM_BP	GO:0002287	alpha-beta T cell activation involved in immune response	11/1221	60/18493	0.00170398	0.0452953	6778/602/5971/64332/51043/10892/114836/54542/2475/6095/3146	11
GOTERM_BP	GO:0002293	alpha-beta T cell differentiation involved in immune response	11/1221	60/18493	0.00170398	0.0452953	6778/602/5971/64332/51043/10892/114836/54542/2475/6095/3146	11
GOTERM_BP	GO:0001776	leukocyte homeostasis	14/1221	88/18493	0.00179999	0.0473761	972/2207/6868/3707/578/5027/6654/5366/207/54542/8314/202309/3146/7040	14
GOTERM_BP	GO:0002819	regulation of adaptive immune response	23/1221	157/18493	0.000260681	0.0163861	3107/2207/6778/5788/3659/3575/113/3570/64332/962/80762/51043/10892/5027/23411/8417/54542/3106/3572/7158/23529/3146/7040	23
GOTERM_BP	GO:0002698	negative regulation of immune effector process	18/1221	111/18493	0.000338631	0.0187952	5788/11314/1604/3575/933/5272/3162/10475/79004/5495/80762/51043/613/54542/11213/1398/708/7040	18
GOTERM_BP	GO:0010935	regulation of macrophage cytokine production	5/1221	12/18493	0.000665951	0.0270703	972/10417/79004/11213/7040	5
GOTERM_BP	GO:0050777	negative regulation of immune response	19/1221	131/18493	0.000976193	0.0338036	6778/5788/5692/3428/11314/1604/3575/5272/3162/171389/58509/79004/80762/51043/613/54542/11213/1398/7040	19
GOTERM_BP	GO:0045088	regulation of innate immune response	40/1221	365/18493	0.00113605	0.0362159	3148/2207/5567/3659/3428/6352/11314/9782/5971/7311/57162/26065/5272/9021/8651/171389/4841/58509/3455/5336/10892/5062/115362/6421/114836/9698/2867/5608/10432/11213/1398/708/90268/9258/9252/164/257397/6059/3146/2219	40
GOTERM_BP	GO:0010506	regulation of autophagy	45/1221	303/18493	2.63847e-07	0.000100695	3428/55294/1982/823/51520/3162/171389/1611/51322/55737/10193/472/51606/6737/51382/5049/533/2081/201475/4943/23411/84148/58476/3064/207/9559/100287171/10645/23274/57154/2475/2773/54832/6720/79443/2931/8992/7942/7249/128866/257397/56893/3146/140710/53373	45
GOTERM_BP	GO:0019216	regulation of lipid metabolic process	53/1221	388/18493	3.68826e-07	0.000131376	10499/7132/8525/55294/85441/8721/7536/6667/10577/3422/51422/6610/9021/8651/1236/9612/2185/116986/1609/5294/2194/96764/84649/8841/124997/208/23411/51099/64805/79602/79888/207/100287171/476/114294/150094/6604/55512/8776/2475/85329/5140/6095/6720/51/31/26137/5901/5447/6907/8720/55066/7040	53
GOTERM_BP	GO:0009895	negative regulation of catabolic process	40/1221	287/18493	5.97313e-06	0.00122748	2316/26986/1982/51520/6599/8531/3162/6872/1611/4088/51322/7077/8241/116986/55737/5294/10492/9683/9759/10193/3183/9827/207/80011/100287171/11213/23274/7874/10956/2475/5140/64844/2931/10128/9860/7249/128866/257397/56893/8604	40
GOTERM_BP	GO:0006109	regulation of carbohydrate metabolic process	27/1221	162/18493	7.53706e-06	0.00143823	10499/51422/2185/1609/84649/9759/5571/2648/208/5027/23411/5366/207/8445/22877/150094/2475/6095/2931/90673/26137/89801/3146/140710/8604/57486/7040	27
GOTERM_BP	GO:0031330	negative regulation of cellular catabolic process	35/1221	245/18493	1.30615e-05	0.00218087	26986/1982/51520/6599/8531/3162/6872/1611/51322/7077/8241/55737/5294/10492/9683/9759/10193/3183/9827/207/80011/100287171/23274/7874/10956/2475/64844/2931/10128/9860/7249/128866/257397/56893/8604	35
GOTERM_BP	GO:0016241	regulation of macroautophagy	26/1221	158/18493	1.39499e-05	0.00224125	823/3162/51322/55737/10193/51606/51382/5049/533/2081/201475/4943/23411/3064/207/9559/23274/57154/2475/2773/54832/79443/8992/7249/128866/56893	26
GOTERM_BP	GO:0009896	positive regulation of catabolic process	50/1221	407/18493	1.6297e-05	0.00240967	26986/55294/10221/1452/3162/6872/51160/5976/51322/2185/55737/51343/677/122809/10193/11060/472/80762/6737/55743/10236/5049/208/5027/201475/23411/9698/51099/58476/79888/3064/207/55147/10645/23274/57154/4193/2773/54832/25820/79443/2931/7942/26137/7249/25897/3146/9781/53373/23112	50
GOTERM_BP	GO:0043244	regulation of protein complex disassembly	20/1221	106/18493	1.76016e-05	0.00247487	57551/9948/832/6711/5976/253725/4943/23064/11344/2107/11213/23274/11078/6710/79443/10300/23122/146057/56893/55604	20
GOTERM_BP	GO:0031331	positive regulation of cellular catabolic process	44/1221	347/18493	2.38964e-05	0.0032738	26986/55294/10221/1452/3162/6872/5976/51322/2185/55737/677/122809/472/6737/55743/10236/5049/208/5027/201475/23411/9698/51099/58476/3064/207/55147/10645/23274/57154/4193/2773/54832/25820/79443/2931/7942/26137/7249/25897/3146/9781/53373/23112	44
GOTERM_BP	GO:0034248	regulation of cellular amide metabolic process	52/1221	453/18493	6.96952e-05	0.00678572	6188/468/26986/7132/602/7458/1982/6352/10289/26065/5935/6610/8531/23645/25946/5976/2185/9513/10492/677/56478/54915/192670/10236/208/10347/9698/2107/274/207/55147/5187/1979/55512/57409/51123/708/2475/8672/60678/80315/2931/10128/16/4691/317649/8550/23185/84881/23112/55571/55066	52
GOTERM_BP	GO:0043087	regulation of GTPase activity	54/1221	481/18493	9.19895e-05	0.00833051	6001/3688/9138/6281/9938/10154/6352/9744/10636/10435/6305/51520/79090/64744/5902/1236/2185/9605/116986/28964/23526/79658/8853/192111/23232/208/6654/9826/4943/23129/613/23527/9827/57186/10484/79874/6102/1398/1122/23380/2475/253260/396/10144/57148/163486/7249/201176/9693/8831/9882/23076/57706/6362	54
GOTERM_BP	GO:0010906	regulation of glucose metabolic process	19/1221	111/18493	0.000112793	0.00975324	10499/1609/84649/2648/208/23411/5366/207/8445/150094/2475/6095/2931/90673/89801/3146/140710/8604/57486	19
GOTERM_BP	GO:1903320	regulation of protein modification by small protein conjugation or removal	30/1221	221/18493	0.000135766	0.0109908	6188/55294/57162/7375/339745/6872/51160/9112/10210/64689/51343/9683/1025/9759/80762/10116/6737/55743/10892/57561/51588/7321/207/100287171/59343/2475/64844/54778/91947/2931	30
GOTERM_BP	GO:0033044	regulation of chromosome organization	40/1221	330/18493	0.000148192	0.0116439	23558/8379/26054/23476/5885/51112/63925/5927/5976/8658/122953/55209/1025/472/2648/26277/51043/3183/80351/6421/84464/90780/23411/80349/9869/5253/54454/9184/908/7874/11143/29117/817/6720/9252/80169/23741/54904/8550/7040	40
GOTERM_BP	GO:0010675	regulation of cellular carbohydrate metabolic process	21/1221	134/18493	0.000184704	0.0137066	10499/2185/1609/84649/9759/2648/208/23411/5366/207/8445/150094/2475/6095/2931/90673/89801/3146/140710/8604/57486	21
GOTERM_BP	GO:0031396	regulation of protein ubiquitination	27/1221	195/18493	0.000207188	0.0140169	6188/55294/57162/7375/339745/6872/51160/9112/10210/64689/51343/9683/1025/80762/10116/55743/10892/57561/7321/207/100287171/59343/2475/64844/54778/91947/2931	27
GOTERM_BP	GO:1903146	regulation of autophagy of mitochondrion	10/1221	40/18493	0.000207249	0.0140169	55294/10193/3064/10645/23274/57154/54832/6720/2931/7249	10
GOTERM_BP	GO:0043547	positive regulation of GTPase activity	46/1221	405/18493	0.000227855	0.0146678	6001/3688/9138/6281/9938/6352/9744/10636/10435/51520/64744/5902/1236/2185/9605/116986/28964/23526/79658/8853/192111/23232/208/6654/9826/4943/613/23527/9827/57186/10484/79874/6102/1122/23380/396/10144/57148/163486/7249/201176/9693/8831/9882/57706/6362	46
GOTERM_BP	GO:0001933	negative regulation of protein phosphorylation	46/1221	408/18493	0.000269299	0.0164745	23770/10048/5788/11314/10636/10221/808/3476/9467/11171/51422/9021/8651/578/171389/2950/1609/9535/91663/58509/84335/23636/5515/122809/8841/27250/4298/5062/5027/11142/9113/23411/207/1399/5187/11213/9770/2475/5795/57732/7249/5518/25937/54431/22876/7040	46
GOTERM_BP	GO:0010508	positive regulation of autophagy	18/1221	110/18493	0.000302008	0.0175395	3162/51322/6737/5049/201475/23411/58476/3064/10645/23274/57154/2773/54832/79443/7942/7249/3146/53373	18
GOTERM_BP	GO:0031056	regulation of histone modification	21/1221	139/18493	0.00030988	0.0178031	23558/23476/63925/5927/122953/55209/1025/472/2648/51043/90780/23411/80349/11143/29117/817/6720/9252/23741/54904/7040	21
GOTERM_BP	GO:1900026	positive regulation of substrate adhesion-dependent cell spreading	9/1221	35/18493	0.00034122	0.0187952	2316/6281/80005/91663/1399/1398/708/11078/55604	9
GOTERM_BP	GO:1905269	positive regulation of chromatin organization	16/1221	94/18493	0.000407531	0.0205112	23558/23476/122953/1025/472/2648/51043/23411/80349/9869/11143/29117/6720/9252/54904/7040	16
GOTERM_BP	GO:0046890	regulation of lipid biosynthetic process	25/1221	183/18493	0.000430008	0.0207883	7132/55294/7536/6667/3422/51422/6610/116986/1609/2194/84649/23411/79602/79888/207/476/150094/55512/2475/6720/31/26137/5901/5447/8720	25
GOTERM_BP	GO:1902275	regulation of chromatin organization	24/1221	175/18493	0.000524086	0.0235667	23558/23476/63925/5927/122953/55209/1025/472/2648/51043/90780/23411/80349/9869/5253/54454/11143/29117/817/6720/9252/23741/54904/7040	24
GOTERM_BP	GO:0031058	positive regulation of histone modification	15/1221	87/18493	0.000530843	0.0235667	23558/23476/122953/1025/472/2648/51043/23411/80349/11143/29117/6720/9252/54904/7040	15
GOTERM_BP	GO:2001252	positive regulation of chromosome organization	23/1221	165/18493	0.000538113	0.0235667	23558/23476/5885/8658/122953/1025/472/2648/51043/80351/6421/84464/23411/80349/9869/908/11143/29117/6720/9252/54904/8550/7040	23
GOTERM_BP	GO:0051052	regulation of DNA metabolic process	45/1221	412/18493	0.000620246	0.0263014	6188/51720/6778/5788/55294/6118/3575/5976/10189/2185/56897/8658/1025/5515/165918/472/26277/80762/3183/80351/84464/1054/23411/9869/9400/92797/207/51149/23244/908/59343/23514/7874/151987/8243/2140/146059/80169/5518/58525/7158/23529/3146/8550/7040	45
GOTERM_BP	GO:1903322	positive regulation of protein modification by small protein conjugation or removal	19/1221	127/18493	0.000664339	0.0270703	55294/57162/9112/10210/64689/51343/1025/9759/80762/55743/10892/57561/51588/7321/59343/64844/54778/91947/2931	19
GOTERM_BP	GO:2000058	regulation of ubiquitin-dependent protein catabolic process	21/1221	147/18493	0.000664967	0.0270703	55294/10221/6599/1452/6872/51322/2185/9683/122809/55743/9113/207/23274/7874/57154/4193/25820/2931/25897/56893/9781	21
GOTERM_BP	GO:0016242	negative regulation of macroautophagy	8/1221	31/18493	0.000708527	0.0282512	3162/10193/207/23274/2475/7249/128866/56893	8
GOTERM_BP	GO:0031398	positive regulation of protein ubiquitination	17/1221	109/18493	0.000774751	0.0302153	55294/57162/9112/10210/64689/51343/1025/80762/55743/10892/57561/7321/59343/64844/54778/91947/2931	17
GOTERM_BP	GO:0120034	positive regulation of plasma membrane bounded cell projection assembly	16/1221	100/18493	0.000823809	0.0312171	10435/1236/10801/6722/9696/9759/23433/10602/9842/5027/11344/64805/3064/100287171/2475/153241	16
GOTERM_BP	GO:0016239	positive regulation of macroautophagy	12/1221	64/18493	0.000868484	0.0326782	3162/51322/5049/201475/23411/3064/23274/57154/2773/54832/79443/7249	12
GOTERM_BP	GO:0043255	regulation of carbohydrate biosynthetic process	15/1221	92/18493	0.000970262	0.0338036	2185/1609/84649/2648/208/207/8445/150094/2475/2931/90673/89801/140710/57486/7040	15
GOTERM_BP	GO:0032881	regulation of polysaccharide metabolic process	9/1221	40/18493	0.000980687	0.0338036	208/207/8445/2475/2931/90673/89801/3146/7040	9
GOTERM_BP	GO:0042058	regulation of epidermal growth factor receptor signaling pathway	14/1221	83/18493	0.00100595	0.0338036	653361/55294/79651/6868/2060/58513/93343/23636/122809/6654/207/5795/8027/57732	14
GOTERM_BP	GO:0070873	regulation of glycogen metabolic process	8/1221	33/18493	0.00110842	0.0361115	208/207/8445/2475/2931/90673/89801/3146	8
GOTERM_BP	GO:0050732	negative regulation of peptidyl-tyrosine phosphorylation	10/1221	49/18493	0.00116886	0.0365217	5788/11314/9467/9021/8651/5515/122809/57732/5518/22876	10
GOTERM_BP	GO:0031349	positive regulation of defense response	45/1221	427/18493	0.00129822	0.0396365	3148/7132/2207/5567/3659/3428/6352/11314/6845/9782/5971/7311/57162/26065/5008/171389/4841/1236/64332/923/5294/58509/3735/27250/5336/10892/5062/115362/6421/114836/9698/2867/5608/10432/11213/708/90268/9258/9252/3572/164/257397/3146/6362/2219	45
GOTERM_BP	GO:1900024	regulation of substrate adhesion-dependent cell spreading	10/1221	50/18493	0.00137602	0.0406192	2316/6281/80005/91663/253725/1399/1398/708/11078/55604	10
GOTERM_BP	GO:1904893	negative regulation of STAT cascade	6/1221	20/18493	0.00141926	0.0413673	602/9021/8651/5515/5518/22876	6
GOTERM_BP	GO:0050792	regulation of viral process	23/1221	177/18493	0.00142459	0.0413673	972/10410/26986/3428/6352/24138/6667/200315/60489/10475/5034/93343/1025/6737/9150/1655/63901/6733/29969/128866/23076/55223/2219	23
GOTERM_BP	GO:0048524	positive regulation of viral process	14/1221	86/18493	0.00143578	0.041467	972/26986/6352/6667/10475/5034/93343/1025/6737/9150/6733/29969/128866/23076	14
GOTERM_BP	GO:0006469	negative regulation of protein kinase activity	27/1221	222/18493	0.00157841	0.0436967	5788/11314/10636/10221/9467/51422/9021/8651/2950/9535/84335/23636/5515/122809/27250/4298/5062/11142/9113/23411/207/11213/5795/57732/7249/5518/25937	27
GOTERM_BP	GO:0032885	regulation of polysaccharide biosynthetic process	8/1221	35/18493	0.00167051	0.0452953	208/207/8445/2475/2931/90673/89801/7040	8
GOTERM_BP	GO:0010907	positive regulation of glucose metabolic process	9/1221	43/18493	0.00169215	0.0452953	84649/2648/208/5366/207/8445/90673/3146/8604	9
GOTERM_BP	GO:0030833	regulation of actin filament polymerization	21/1221	158/18493	0.00169448	0.0452953	10095/832/10435/6711/1236/2185/9535/91663/253725/10602/9113/11344/274/100287171/123720/2475/11078/253260/6710/55604/348110	21
GOTERM_BP	GO:0045785	positive regulation of cell adhesion	42/1221	397/18493	0.00171845	0.0454538	6188/972/2316/7402/5788/6281/8861/6352/3676/1604/3575/9092/3707/8651/3570/1236/64332/4088/7048/2185/923/80005/91663/472/51043/4860/10892/5062/9402/64805/207/1399/1398/708/11078/5795/3572/4811/3146/55604/7040/22915	42
GOTERM_BP	GO:0005979	regulation of glycogen biosynthetic process	7/1221	28/18493	0.00186252	0.048522	208/207/8445/2475/2931/90673/89801	7
GOTERM_BP	GO:0010962	regulation of glucan biosynthetic process	7/1221	28/18493	0.00186252	0.048522	208/207/8445/2475/2931/90673/89801	7
GOTERM_BP	GO:0042176	regulation of protein catabolic process	40/1221	375/18493	0.00187985	0.048522	2316/55294/10221/6599/1452/6872/51160/4088/51322/2185/7077/116986/55737/51343/9683/122809/10193/11060/80762/55743/9113/9827/79888/207/80011/5709/10213/11213/23274/7874/57154/10956/4193/64844/25820/2931/9860/25897/56893/9781	40
GOTERM_BP	GO:0031334	positive regulation of protein complex assembly	30/1221	259/18493	0.00194109	0.0496231	6188/10095/6118/10435/6872/1236/2185/6722/9535/2242/472/253725/10602/115362/23064/5366/64805/274/23379/100287171/123720/23514/125170/2475/96459/253260/10142/55604/348110/7040	30
GOTERM_BP	GO:0032147	activation of protein kinase activity	38/1221	323/18493	0.000390125	0.0201453	972/57551/5567/5788/4217/6352/11314/7311/51422/8651/3570/55437/10961/7048/2185/1609/6789/9043/3735/51765/10892/5062/5027/2081/23162/9748/207/1399/5608/1398/2475/253260/29969/8795/257397/57498/3146/8550	38
GOTERM_BP	GO:0007041	lysosomal transport	16/1221	101/18493	0.000920095	0.033048	22898/6845/51520/55737/2580/201475/6272/274/9648/81609/79158/23274/64145/164/54664/51542	16
GOTERM_BP	GO:0032869	cellular response to insulin stimulus	31/1221	204/18493	1.16084e-05	0.00200076	896/10890/4303/6667/6599/9021/8651/2950/677/23433/51606/51043/51382/208/57727/533/6654/23411/207/9847/1979/26060/4644/5140/6720/2931/8992/7249/6715/9882/140710	31
GOTERM_BP	GO:0071375	cellular response to peptide hormone stimulus	39/1221	307/18493	6.52517e-05	0.00657811	896/4149/5567/10890/4303/6667/6599/9021/8651/113/2950/677/23433/51606/51043/51382/208/57727/533/6654/23411/207/9847/1979/26060/1398/4644/4193/5140/6720/2931/8992/4929/7249/5447/6715/9882/140710/7040	39
GOTERM_BP	GO:0071496	cellular response to external stimulus	38/1221	328/18493	0.000526573	0.0235667	468/81788/4149/7132/1265/5788/4217/3659/3428/51520/3162/6872/578/1611/2950/6722/8658/9759/51765/5027/10514/23411/5366/64805/207/476/150094/5287/23274/2475/4193/96459/80315/6720/4929/8795/6715/7040	38
GOTERM_BP	GO:2001020	regulation of response to DNA damage stimulus	30/1221	206/18493	3.66317e-05	0.00399435	6188/3190/972/51720/598/6118/1032/25946/56897/1025/165918/472/10116/51588/1054/23411/138151/9400/1655/5366/92797/51149/23514/151987/4193/2140/64844/79621/7158/3146	30
GOTERM_BP	GO:2001022	positive regulation of response to DNA damage stimulus	15/1221	92/18493	0.000970262	0.0338036	6188/51720/25946/165918/472/51588/1054/23411/138151/1655/5366/51149/23514/2140/3146	15
GOTERM_BP	GO:0006403	RNA localization	34/1221	231/18493	9.05546e-06	0.00161278	2091/29107/25946/54890/5976/10189/9972/7048/23144/10482/8658/23636/677/472/24148/9804/6421/29894/26019/636/348995/908/100101267/59343/57122/64062/10128/54439/53981/51362/5901/9887/54680/6059	34
GOTERM_BP	GO:0034067	protein localization to Golgi apparatus	9/1221	27/18493	3.65883e-05	0.00399435	5870/55187/2580/83452/115362/10139/9648/64083/54832	9
GOTERM_BP	GO:0051236	establishment of RNA localization	28/1221	198/18493	0.000110593	0.00975324	29107/54890/5976/10189/9972/7048/23144/10482/8658/23636/677/472/9804/6421/29894/26019/348995/100101267/59343/57122/64062/10128/54439/53981/51362/5901/9887/6059	28
GOTERM_BP	GO:0072659	protein localization to plasma membrane	31/1221	244/18493	0.000351105	0.0190115	3688/2316/7132/2207/10890/6281/598/6845/6711/55737/91663/23433/2580/8500/208/23241/10139/8417/207/9847/23759/64083/26060/122416/57154/4644/22841/23122/9693/81619/7040	31
GOTERM_BP	GO:0034504	protein localization to nucleus	32/1221	269/18493	0.000898829	0.033048	2316/602/29107/4088/9972/10210/23636/8841/10628/473/10347/11142/23411/23607/30000/23345/207/908/100101267/11143/57122/4193/9258/29969/23633/7249/5901/6500/25885/9913/8720/7040	32
GOTERM_BP	GO:0097193	intrinsic apoptotic signaling pathway	41/1221	287/18493	2.44918e-06	0.000568956	6188/468/3190/972/7132/602/4217/3428/55294/598/8531/1032/3162/578/4841/23645/25946/10961/5034/10210/472/2081/6421/51588/10514/23411/138151/1655/5366/207/8445/85329/4193/64844/81537/51060/8795/8065/54700/54431/6477	41
GOTERM_BP	GO:0008630	intrinsic apoptotic signaling pathway in response to DNA damage	18/1221	102/18493	0.000113176	0.00975324	6188/3190/972/7132/602/3428/598/1032/3162/578/25946/10210/472/51588/23411/138151/8445/64844	18
GOTERM_BP	GO:0097191	extrinsic apoptotic signaling pathway	29/1221	224/18493	0.000392123	0.0201453	3148/7132/5788/162989/10616/598/3570/3162/578/55437/4088/2950/6789/10193/10116/5062/5027/6272/5366/3064/207/26060/2140/2931/81537/2730/8795/5518/7040	29
GOTERM_BP	GO:0072332	intrinsic apoptotic signaling pathway by p53 class mediator	14/1221	76/18493	0.000402148	0.0204636	3190/972/602/3428/25946/10210/10514/23411/1655/5366/8445/4193/64844/54700	14
GOTERM_BP	GO:0070059	intrinsic apoptotic signaling pathway in response to endoplasmic reticulum stress	11/1221	59/18493	0.00147816	0.0422341	468/4217/578/23645/10961/2081/23411/5366/51060/8795/54431	11
GOTERM_BP	GO:0042771	intrinsic apoptotic signaling pathway in response to DNA damage by p53 class mediator	9/1221	43/18493	0.00169215	0.0452953	3190/972/602/3428/25946/10210/23411/8445/64844	9
GOTERM_BP	GO:1902229	regulation of intrinsic apoptotic signaling pathway in response to DNA damage	10/1221	39/18493	0.000165114	0.012603	6188/3190/972/598/1032/25946/51588/23411/138151/64844	10
GOTERM_BP	GO:2001233	regulation of apoptotic signaling pathway	45/1221	391/18493	0.000197209	0.0140169	6188/3190/972/3148/5788/55294/162989/10616/598/8531/1032/3162/578/4841/55437/25946/10971/10961/4088/5034/2950/6789/10116/5062/1524/84289/6421/51588/23411/138151/5366/3064/207/4193/2140/2773/64844/2931/51060/2730/4929/8795/5518/54700/6477	45
GOTERM_BP	GO:2001242	regulation of intrinsic apoptotic signaling pathway	22/1221	161/18493	0.000921609	0.033048	6188/3190/972/55294/598/8531/1032/4841/25946/10961/5034/6421/51588/23411/138151/5366/207/4193/64844/51060/54700/6477	22
GOTERM_BP	GO:0010498	proteasomal protein catabolic process	66/1221	452/18493	8.98219e-10	4.26362e-06	5698/5692/55294/10616/10221/144699/7311/57162/7323/54620/6599/339745/1452/6872/23304/9112/10475/51322/10210/997/51343/9683/122809/5688/10193/57003/11060/7844/25852/55743/92305/23411/23607/7321/6400/5366/207/80011/267/8924/10213/9184/5713/23274/7874/57154/10956/4193/54788/64844/25820/2931/54557/64839/56886/81858/6500/55757/25937/9354/25897/6907/54431/56893/9781/6477	66
GOTERM_BP	GO:0043161	proteasome-mediated ubiquitin-dependent protein catabolic process	59/1221	389/18493	1.65831e-09	4.26362e-06	5698/5692/55294/10616/10221/144699/7311/57162/7323/54620/6599/339745/1452/6872/23304/9112/10475/51322/10210/997/51343/9683/122809/5688/57003/11060/7844/25852/55743/92305/23411/23607/7321/6400/207/267/8924/10213/9184/5713/23274/7874/57154/10956/4193/25820/2931/54557/64839/81858/6500/25937/9354/25897/6907/54431/56893/9781/6477	59
GOTERM_BP	GO:0044262	cellular carbohydrate metabolic process	40/1221	278/18493	2.70309e-06	0.000601776	10499/5226/3101/51422/55454/2185/1609/2683/84649/9759/2648/2548/208/3632/23411/5366/207/8445/79158/5257/2820/150094/2475/26509/2632/6095/2931/54928/3572/90673/5236/89801/5501/2131/3146/140710/8604/55790/57486/2595	40
GOTERM_BP	GO:0005976	polysaccharide metabolic process	20/1221	109/18493	2.69277e-05	0.00359687	51422/55454/56548/2548/208/207/8445/5257/2475/2632/2931/3572/90673/5236/89801/5501/2131/3146/55790/7040	20
GOTERM_BP	GO:0005977	glycogen metabolic process	15/1221	73/18493	6.98512e-05	0.00678572	51422/2548/208/207/8445/5257/2475/2632/2931/3572/90673/5236/89801/5501/3146	15
GOTERM_BP	GO:0044264	cellular polysaccharide metabolic process	18/1221	99/18493	7.57944e-05	0.0072316	51422/55454/2548/208/207/8445/5257/2475/2632/2931/3572/90673/5236/89801/5501/2131/3146/55790	18
GOTERM_BP	GO:0006073	cellular glucan metabolic process	15/1221	74/18493	8.23319e-05	0.00758447	51422/2548/208/207/8445/5257/2475/2632/2931/3572/90673/5236/89801/5501/3146	15
GOTERM_BP	GO:0044042	glucan metabolic process	15/1221	74/18493	8.23319e-05	0.00758447	51422/2548/208/207/8445/5257/2475/2632/2931/3572/90673/5236/89801/5501/3146	15
GOTERM_BP	GO:0006006	glucose metabolic process	27/1221	204/18493	0.000431873	0.0207883	10499/468/226/3101/1609/84649/2648/2548/208/23411/5366/207/283450/8445/2820/150094/2475/6095/2931/1737/90673/5236/89801/3146/140710/8604/57486	27
GOTERM_BP	GO:0006112	energy reserve metabolic process	15/1221	87/18493	0.000530843	0.0235667	51422/2548/208/207/8445/5257/2475/2632/2931/3572/90673/5236/89801/5501/3146	15
GOTERM_BP	GO:0006401	RNA catabolic process	39/1221	340/18493	0.000544998	0.0236742	6188/26986/162989/85441/7311/11157/8531/5976/8241/9513/84153/10492/677/5515/192670/472/3183/10236/2081/23589/80349/9698/26019/1655/2107/207/55147/26135/2475/342618/10128/6218/79621/6232/9887/5518/23112/55571/55181	39
GOTERM_BP	GO:0019318	hexose metabolic process	30/1221	244/18493	0.000750497	0.0294846	10499/468/226/3101/2530/4124/1609/2683/84649/2648/2548/208/23411/5366/207/283450/8445/2820/150094/2475/6095/2931/1737/90673/5236/89801/3146/140710/8604/57486	30
GOTERM_BP	GO:0006402	mRNA catabolic process	35/1221	307/18493	0.00113874	0.0362159	6188/26986/85441/7311/11157/8531/5976/8241/9513/10492/677/5515/192670/472/3183/10236/2081/23589/80349/9698/26019/1655/2107/207/55147/26135/2475/342618/6218/6232/9887/5518/23112/55571/55181	35
GOTERM_BP	GO:0007173	epidermal growth factor receptor signaling pathway	19/1221	120/18493	0.000321219	0.0182582	653361/55294/79651/6868/2060/2185/58513/93343/23636/122809/6654/5335/207/9770/5795/8027/9252/57732/7040	19
GOTERM_BP	GO:0038127	ERBB signaling pathway	21/1221	143/18493	0.000458242	0.0218606	653361/55294/79651/6868/2060/2185/58513/93343/23636/122809/8895/6654/5335/207/9770/5795/8027/9252/57732/8065/7040	21
GOTERM_BP	GO:0032006	regulation of TOR signaling	16/1221	100/18493	0.000823809	0.0312171	51520/23304/1609/84335/8841/472/55654/23411/64083/150094/23274/96459/253260/2931/7249/8550	16
GOTERM_BP	GO:0032007	negative regulation of TOR signaling	10/1221	50/18493	0.00137602	0.0406192	23304/84335/472/55654/23411/150094/96459/2931/7249/8550	10
GOTERM_BP	GO:0031929	TOR signaling	19/1221	118/18493	0.000257516	0.0163799	51520/23304/1609/84335/8841/472/55654/23411/207/64083/1979/150094/23274/2475/96459/253260/2931/7249/8550	19
GOTERM_BP	GO:1901796	regulation of signal transduction by p53 class mediator	19/1221	130/18493	0.000888377	0.0330463	3190/972/6881/6872/25946/8148/472/84289/23411/1655/5366/207/8445/29117/4193/64844/6873/54700/8550	19
GOTERM_BP	GO:0043516	regulation of DNA damage response, signal transduction by p53 class mediator	8/1221	32/18493	0.000890635	0.0330463	972/25946/472/23411/1655/5366/4193/64844	8
GOTERM_BP	GO:0043122	regulation of I-kappaB kinase/NF-kappaB signaling	33/1221	226/18493	1.44431e-05	0.00224125	972/2316/7132/6398/10616/24138/10342/57162/1936/23476/3162/171389/51523/1236/10475/2950/23636/5494/5495/80762/10892/1524/23411/207/124583/5187/23005/6095/843/347734/81858/8795/55223	33
GOTERM_BP	GO:0043123	positive regulation of I-kappaB kinase/NF-kappaB signaling	26/1221	181/18493	0.000148127	0.0116439	972/2316/7132/6398/10616/24138/10342/57162/1936/23476/3162/51523/1236/10475/23636/5494/80762/10892/1524/207/124583/843/347734/81858/8795/55223	26
GOTERM_BP	GO:0007249	I-kappaB kinase/NF-kappaB signaling	37/1221	258/18493	6.8317e-06	0.00135192	972/2316/7132/6398/602/10616/24138/5971/7311/10342/57162/1936/23476/3162/171389/51523/1236/10475/2950/23636/5494/5495/80762/10892/1524/23411/207/124583/5187/23005/6095/843/347734/81858/8795/257397/55223	37
GOTERM_BP	GO:0046426	negative regulation of JAK-STAT cascade	6/1221	19/18493	0.00105174	0.0349035	602/9021/8651/5515/5518/22876	6
GOTERM_BP	GO:0006914	autophagy	66/1221	466/18493	3.19193e-09	4.26362e-06	3428/55294/1982/823/51520/51422/81671/3162/23130/171389/51160/128077/1611/51322/55737/93343/5571/10193/472/51606/6737/55014/51382/124997/192111/83452/5049/9842/533/2081/201475/4943/23411/84148/23241/58476/3064/207/10484/9559/100287171/10645/5287/23274/57154/2475/2773/54832/6720/79443/2931/137492/8992/8027/9895/7942/7249/55102/128866/257397/56893/3146/140710/55669/53373/83636	66
GOTERM_BP	GO:0061919	process utilizing autophagic mechanism	66/1221	466/18493	3.19193e-09	4.26362e-06	3428/55294/1982/823/51520/51422/81671/3162/23130/171389/51160/128077/1611/51322/55737/93343/5571/10193/472/51606/6737/55014/51382/124997/192111/83452/5049/9842/533/2081/201475/4943/23411/84148/23241/58476/3064/207/10484/9559/100287171/10645/5287/23274/57154/2475/2773/54832/6720/79443/2931/137492/8992/8027/9895/7942/7249/55102/128866/257397/56893/3146/140710/55669/53373/83636	66
GOTERM_BP	GO:0016570	histone modification	63/1221	456/18493	1.9101e-08	1.68712e-05	23558/51720/2091/23135/8861/6881/51564/22992/339287/9219/23476/63925/5927/6872/23304/9112/51322/122953/55209/1025/9759/8841/165918/472/2648/51043/2145/79813/84289/55167/6421/90780/2005/23411/80349/9869/84148/138151/5253/83852/10432/23186/5187/64426/7874/11143/29117/817/2140/9329/6720/9252/57634/10765/8314/23741/6500/6907/54904/9913/54531/11108/7040	63
GOTERM_BP	GO:0016236	macroautophagy	45/1221	279/18493	2.21033e-08	1.68712e-05	823/51422/81671/3162/23130/51160/128077/51322/55737/93343/5571/10193/51606/55014/51382/124997/192111/83452/5049/533/2081/201475/4943/23411/23241/58476/3064/207/10484/9559/5287/23274/57154/2475/2773/54832/79443/137492/8992/8027/7249/55102/128866/56893/55669	45
GOTERM_BP	GO:0016569	covalent chromatin modification	64/1221	470/18493	2.57737e-08	1.72136e-05	23558/51720/2091/23135/8861/6881/51564/22992/339287/9219/23476/63925/5927/6872/23304/9112/51322/122953/55209/1025/9759/8841/165918/472/2648/51043/2145/79813/84289/55167/6421/1788/90780/2005/23411/80349/9869/84148/138151/5253/83852/10432/23186/5187/64426/7874/11143/29117/817/2140/9329/6720/9252/57634/10765/8314/23741/6500/6907/54904/9913/54531/11108/7040	64
GOTERM_BP	GO:0000209	protein polyubiquitination	42/1221	257/18493	4.42083e-08	2.09148e-05	55294/10616/144699/7311/57162/7323/54620/6872/4012/223082/23304/10475/10210/997/8658/51343/92912/10193/165918/11060/6737/55743/80351/92305/7321/150726/25831/54542/23759/267/91694/63893/57154/64844/25820/54778/81858/6500/9354/25897/9781/6477	42
GOTERM_BP	GO:0016575	histone deacetylation	21/1221	86/18493	1.26575e-07	5.20222e-05	51564/9219/5927/9112/122953/9759/8841/51043/6421/2005/23411/138151/10432/23186/5187/64426/817/6720/6907/54531/7040	21
GOTERM_BP	GO:0035601	protein deacylation	23/1221	111/18493	7.77426e-07	0.00025816	51564/9219/5927/9112/122953/9759/8841/51043/84945/11313/6421/2005/23411/138151/10432/23186/5187/64426/817/6720/6907/54531/7040	23
GOTERM_BP	GO:0016197	endosomal transport	34/1221	208/18493	8.29743e-07	0.00025816	10890/5870/7311/9784/5119/2060/51160/8677/11021/55737/93343/9043/80148/253725/22853/9727/10139/6272/9827/9648/81609/9559/100287171/23274/63893/55317/137492/8027/163486/64145/128866/22876/57706/51542	34
GOTERM_BP	GO:0006913	nucleocytoplasmic transport	49/1221	357/18493	8.77313e-07	0.00025816	2316/6628/602/10636/29107/55437/54890/5976/10189/4088/9972/2010/23144/10482/23636/5571/5494/8841/10628/473/10892/11142/23411/6632/29894/30000/26019/207/348995/100101267/55341/57154/57122/4193/64062/6636/29969/6310/54439/53981/23633/7249/51362/5901/9887/6059/5501/8720/7040	49
GOTERM_BP	GO:0098732	macromolecule deacylation	23/1221	112/18493	9.18031e-07	0.00025816	51564/9219/5927/9112/122953/9759/8841/51043/84945/11313/6421/2005/23411/138151/10432/23186/5187/64426/817/6720/6907/54531/7040	23
GOTERM_BP	GO:0051169	nuclear transport	49/1221	360/18493	1.12291e-06	0.000299986	2316/6628/602/10636/29107/55437/54890/5976/10189/4088/9972/2010/23144/10482/23636/5571/5494/8841/10628/473/10892/11142/23411/6632/29894/30000/26019/207/348995/100101267/55341/57154/57122/4193/64062/6636/29969/6310/54439/53981/23633/7249/51362/5901/9887/6059/5501/8720/7040	49
GOTERM_BP	GO:0006476	protein deacetylation	21/1221	101/18493	2.19071e-06	0.000532045	51564/9219/5927/9112/122953/9759/8841/51043/6421/2005/23411/138151/10432/23186/5187/64426/817/6720/6907/54531/7040	21
GOTERM_BP	GO:0048193	Golgi vesicle transport	47/1221	359/18493	5.43052e-06	0.00116061	3796/10890/5870/6892/832/1604/6845/10342/79090/51112/10960/6711/2060/64689/1315/5265/2580/55014/22872/55291/83452/84342/201475/9276/1783/1778/10139/6272/399687/9648/3064/10484/64837/64083/6102/123720/3831/3835/4644/54832/5537/6710/57222/55770/64145/164/51542	47
GOTERM_BP	GO:0008380	RNA splicing	56/1221	463/18493	8.22422e-06	0.00151524	4154/3190/26986/79026/6628/10421/7536/7375/11171/11157/9092/5935/92906/4841/10189/51503/8241/8449/2962/10492/58509/22913/96764/5515/1665/9904/24148/3183/10236/9879/283989/2081/6421/23064/6632/29894/1655/1207/84950/6651/6733/151987/708/55660/6636/23350/53981/9129/9169/51362/55131/57703/5518/23076/54957/10150	56
GOTERM_BP	GO:0007034	vacuolar transport	23/1221	131/18493	1.46816e-05	0.00224125	22898/6845/51520/5119/51160/55737/80762/55187/2580/201475/6272/274/9648/81609/79158/23274/57154/54832/64145/164/128866/54664/51542	23
GOTERM_BP	GO:0008286	insulin receptor signaling pathway	23/1221	132/18493	1.66869e-05	0.00240967	896/4303/6599/9021/8651/23433/51606/51043/51382/208/57727/533/6654/23411/207/9847/1979/26060/6720/2931/8992/7249/140710	23
GOTERM_BP	GO:0060992	response to fungicide	6/1221	11/18493	2.8334e-05	0.00360449	23135/10365/598/79813/10765/6715	6
GOTERM_BP	GO:0051168	nuclear export	29/1221	194/18493	3.00567e-05	0.00369085	29107/55437/54890/5976/10189/9972/2010/23144/10482/23636/5494/10892/29894/26019/348995/100101267/55341/57154/57122/4193/64062/6310/54439/53981/51362/5901/9887/6059/7040	29
GOTERM_BP	GO:0051235	maintenance of location	41/1221	318/18493	3.03944e-05	0.00369085	2495/2316/5788/602/55294/808/1236/2185/10210/187/81573/4232/84649/55187/5336/3954/2548/5027/5335/8694/9113/23411/2867/11344/51099/23345/3064/207/64083/7226/10956/4644/817/54832/10142/3710/6500/9913/53373/7040/4052	41
GOTERM_BP	GO:0032943	mononuclear cell proliferation	36/1221	266/18493	3.25966e-05	0.0038703	6188/973/972/896/5788/8379/3659/6352/11314/1604/3575/57162/933/63925/3570/7048/3614/23240/923/5294/2000/472/80762/51043/4860/10892/5027/6654/54542/64844/3572/202309/23529/3146/931/7040	36
GOTERM_BP	GO:0000377	RNA splicing, via transesterification reactions with bulged adenosine as nucleophile	46/1221	374/18493	3.40819e-05	0.00387446	4154/3190/26986/6628/10421/7536/7375/11171/11157/9092/5935/10189/51503/8241/8449/2962/10492/58509/22913/96764/1665/9904/24148/3183/10236/9879/6421/23064/6632/29894/1655/1207/84950/6651/6733/708/55660/6636/23350/53981/9129/9169/51362/57703/54957/10150	46
GOTERM_BP	GO:0000398	mRNA splicing, via spliceosome	46/1221	374/18493	3.40819e-05	0.00387446	4154/3190/26986/6628/10421/7536/7375/11171/11157/9092/5935/10189/51503/8241/8449/2962/10492/58509/22913/96764/1665/9904/24148/3183/10236/9879/6421/23064/6632/29894/1655/1207/84950/6651/6733/708/55660/6636/23350/53981/9129/9169/51362/57703/54957/10150	46
GOTERM_BP	GO:0000375	RNA splicing, via transesterification reactions	46/1221	377/18493	4.15646e-05	0.00444159	4154/3190/26986/6628/10421/7536/7375/11171/11157/9092/5935/10189/51503/8241/8449/2962/10492/58509/22913/96764/1665/9904/24148/3183/10236/9879/6421/23064/6632/29894/1655/1207/84950/6651/6733/708/55660/6636/23350/53981/9129/9169/51362/57703/54957/10150	46
GOTERM_BP	GO:0032868	response to insulin	35/1221	259/18493	4.30427e-05	0.00450935	896/4149/10890/4303/6667/6599/9021/8651/2950/677/3030/23433/51606/51043/51382/208/57727/533/6654/23411/6272/207/9847/1979/26060/2475/4644/5140/6720/2931/8992/7249/6715/9882/140710	35
GOTERM_BP	GO:0016051	carbohydrate biosynthetic process	29/1221	209/18493	0.000118264	0.00994274	468/226/5226/55454/2530/2185/1609/2683/84649/2648/208/30815/207/8445/2820/150094/2475/2632/2931/54928/90673/5236/89801/2131/140710/8604/55790/57486/7040	29
GOTERM_BP	GO:0032984	protein-containing complex disassembly	39/1221	317/18493	0.000130347	0.0107145	3796/55052/57551/9948/832/6599/1452/5119/6711/128077/5976/4778/6603/63908/2580/55014/253725/51258/4943/23064/116540/11344/2107/54460/9801/11213/6604/23274/3831/11078/6710/79443/10300/23122/146057/6059/56893/124995/55604	39
GOTERM_BP	GO:0010934	macrophage cytokine production	6/1221	14/18493	0.000154972	0.0120002	972/10417/79004/23411/11213/7040	6
GOTERM_BP	GO:0043242	negative regulation of protein complex disassembly	14/1221	71/18493	0.00019176	0.0140169	57551/832/6711/253725/11344/11213/23274/11078/6710/10300/23122/146057/56893/55604	14
GOTERM_BP	GO:0050657	nucleic acid transport	27/1221	195/18493	0.000207188	0.0140169	29107/54890/5976/10189/9972/7048/23144/10482/8658/23636/677/9804/6421/29894/26019/348995/100101267/59343/57122/64062/10128/54439/53981/51362/5901/9887/6059	27
GOTERM_BP	GO:0050658	RNA transport	27/1221	195/18493	0.000207188	0.0140169	29107/54890/5976/10189/9972/7048/23144/10482/8658/23636/677/9804/6421/29894/26019/348995/100101267/59343/57122/64062/10128/54439/53981/51362/5901/9887/6059	27
GOTERM_BP	GO:0022613	ribonucleoprotein complex biogenesis	53/1221	485/18493	0.000210683	0.014071	55052/2091/6628/7458/10421/7536/57050/7375/11171/26065/29777/11157/9092/8994/96764/192670/64434/472/24148/23064/23411/6632/51077/27079/1778/65095/26168/55720/636/1207/6733/51096/708/6636/11103/51386/51018/8665/23195/6218/55623/9129/9169/6232/81875/5901/51388/54680/6059/54700/124995/23076/79707	53
GOTERM_BP	GO:0019882	antigen processing and presentation	25/1221	175/18493	0.000214866	0.0141732	3796/3107/972/2207/10890/5870/6892/832/5971/6890/4012/1236/5867/11021/22872/1783/1778/10484/64837/8905/114876/3831/3835/3106/164	25
GOTERM_BP	GO:0016050	vesicle organization	38/1221	314/18493	0.000221589	0.0144384	6281/6892/8676/6845/6890/10342/79090/5119/2060/51160/25946/8677/64689/93343/80208/5265/55014/22872/55654/55291/208/5027/23607/6272/8417/399687/388552/10484/9847/64083/2773/10015/5537/137492/8027/164/128866/9882	38
GOTERM_BP	GO:0036507	protein demannosylation	7/1221	21/18493	0.000274772	0.0164745	4121/7844/6400/267/10956/56886/55757	7
GOTERM_BP	GO:0036508	protein alpha-1,2-demannosylation	7/1221	21/18493	0.000274772	0.0164745	4121/7844/6400/267/10956/56886/55757	7
GOTERM_BP	GO:0070932	histone H3 deacetylation	7/1221	21/18493	0.000274772	0.0164745	51564/9759/8841/6421/2005/23411/5187	7
GOTERM_BP	GO:0051170	import into nucleus	25/1221	178/18493	0.000280588	0.0164745	2316/6628/602/29107/4088/9972/23636/5571/8841/10628/473/11142/23411/6632/30000/207/100101267/57122/6636/29969/23633/7249/5901/8720/7040	25
GOTERM_BP	GO:0042326	negative regulation of phosphorylation	49/1221	448/18493	0.000352262	0.0190115	23770/10048/5788/11314/10636/10221/808/3476/9467/11171/51422/9021/8651/1032/578/171389/2950/1609/9535/91663/58509/84335/23636/9759/5515/122809/8841/27250/4298/5062/5027/11142/9113/23411/207/1399/100287171/5187/11213/9770/2475/5795/57732/7249/5518/25937/54431/22876/7040	49
GOTERM_BP	GO:0006417	regulation of translation	45/1221	402/18493	0.000365576	0.0195327	6188/468/26986/602/7458/1982/6352/10289/26065/5935/8531/23645/25946/5976/2185/9513/10492/677/56478/54915/192670/10236/208/9698/2107/207/55147/5187/1979/57409/51123/708/2475/8672/60678/80315/10128/16/4691/317649/8550/23185/84881/23112/55571	45
GOTERM_BP	GO:0031648	protein destabilization	10/1221	43/18493	0.000391186	0.0201453	55294/55737/6737/55743/23411/3064/59343/4193/440193/6477	10
GOTERM_BP	GO:0042532	negative regulation of tyrosine phosphorylation of STAT protein	5/1221	11/18493	0.000410761	0.0205112	9021/8651/5515/5518/22876	5
GOTERM_BP	GO:0016311	dephosphorylation	51/1221	475/18493	0.000417525	0.0206559	5788/10421/63935/11314/808/3476/6305/23645/4088/152926/5515/5494/5495/124997/192111/9150/55291/3632/22853/5775/3064/132160/23523/58478/476/8073/162466/3631/8776/151987/2475/2140/64062/5537/9258/5795/81537/54928/5533/90673/26012/55105/8732/9887/5518/5501/22876/23076/26229/55066/7040	51
GOTERM_BP	GO:0030099	myeloid cell differentiation	45/1221	405/18493	0.000429762	0.0207883	972/3148/2207/10365/1441/3428/55294/10398/8861/9948/22904/5971/10221/23218/3707/1236/25946/4778/87/7048/2185/6722/2194/677/10193/192670/2242/80762/2034/5613/1054/23411/80349/4831/84148/4853/126014/9770/2475/2124/9258/139716/3146/23112/7040	45
GOTERM_BP	GO:0000387	spliceosomal snRNP assembly	11/1221	52/18493	0.000487277	0.0228379	6628/10421/7375/11171/9092/96764/24148/6632/1207/6636/9129	11
GOTERM_BP	GO:0002407	dendritic cell chemotaxis	7/1221	23/18493	0.000515551	0.0235667	3577/6352/1236/5294/7226/708/3146	7
GOTERM_BP	GO:1904380	endoplasmic reticulum mannose trimming	6/1221	17/18493	0.000537789	0.0235667	7844/6400/267/10956/56886/55757	6
GOTERM_BP	GO:0007051	spindle organization	23/1221	165/18493	0.000538113	0.0235667	3796/6188/203068/2316/26054/10636/5119/8658/23636/440145/8841/1778/85378/10844/10274/8243/5116/153241/23122/5901/6905/5518/128866	23
GOTERM_BP	GO:0006517	protein deglycosylation	8/1221	30/18493	0.000557625	0.0240273	4121/4124/7844/6400/267/10956/56886/55757	8
GOTERM_BP	GO:0002478	antigen processing and presentation of exogenous peptide antigen	19/1221	126/18493	0.000601391	0.0257059	3796/3107/972/2207/6892/832/6890/4012/22872/1783/1778/10484/64837/8905/114876/3831/3835/3106/164	19
GOTERM_BP	GO:0019080	viral gene expression	12/1221	62/18493	0.000645245	0.0270703	10410/6352/6667/1025/6737/9150/22879/29969/51386/8665/23076/55223	12
GOTERM_BP	GO:0031348	negative regulation of defense response	26/1221	199/18493	0.000665984	0.0270703	7132/5788/5692/3428/5272/9021/113/171389/10475/4088/2950/55737/58509/79004/5495/27250/80762/613/11213/1398/708/23005/90268/9258/6095/81858	26
GOTERM_BP	GO:0006405	RNA export from nucleus	20/1221	137/18493	0.000668778	0.0270703	29107/54890/5976/10189/9972/23144/10482/23636/29894/26019/348995/100101267/57122/64062/54439/53981/51362/5901/9887/6059	20
GOTERM_BP	GO:1901653	cellular response to peptide	40/1221	356/18493	0.000701964	0.0282	896/4149/5567/10365/10890/4303/6667/6599/9021/8651/113/2950/677/23433/51606/51043/51382/208/57727/533/6654/23411/207/9847/1979/26060/1398/4644/4193/5140/6720/2931/8992/4929/7249/5447/6715/9882/140710/7040	40
GOTERM_BP	GO:0018393	internal peptidyl-lysine acetylation	22/1221	158/18493	0.000714	0.0282585	23558/8861/6881/339287/6872/55209/2648/84289/55167/90780/23411/84148/5187/11143/29117/9329/9252/57634/23741/5447/9913/7040	22
GOTERM_BP	GO:0006611	protein export from nucleus	24/1221	180/18493	0.000788728	0.0305375	29107/55437/54890/5976/10189/9972/2010/23144/10482/23636/5494/29894/26019/348995/100101267/57154/57122/4193/53981/51362/5901/9887/6059/7040	24
GOTERM_BP	GO:0043434	response to peptide hormone	45/1221	417/18493	0.000799014	0.0307132	6678/896/4149/5567/10890/4303/6667/6599/9021/8651/113/2950/677/3030/23433/51606/51043/51382/208/57727/533/6654/23411/4831/6272/207/9847/1979/26060/1398/2475/4644/4193/5140/6720/2931/8992/4929/7249/5447/6715/9882/140710/694/7040	45
GOTERM_BP	GO:0018205	peptidyl-lysine modification	40/1221	361/18493	0.000920329	0.033048	23558/8861/26054/6881/51564/339287/23476/63925/6872/10210/55209/9759/2648/2145/79813/84289/55167/90780/51588/23411/80349/9869/84148/83852/26168/205564/5187/59343/11143/29117/4193/9329/9252/51218/57634/23741/5447/54904/9913/7040	40
GOTERM_BP	GO:0048872	homeostasis of number of cells	30/1221	248/18493	0.000978323	0.0338036	972/3148/2207/10365/8861/3575/6868/3707/3162/578/1236/6722/677/2034/5027/6654/1054/613/5366/207/54542/9770/9258/6218/8314/202309/54700/3146/51542/7040	30
GOTERM_BP	GO:0015931	nucleobase-containing compound transport	29/1221	237/18493	0.000983202	0.0338036	29107/54890/5976/10189/9972/7048/23144/10482/8658/23636/677/9804/5027/6421/29894/26019/348995/100101267/59343/57122/64062/10128/54439/53981/347734/51362/5901/9887/6059	29
GOTERM_BP	GO:0019083	viral transcription	10/1221	48/18493	0.000987864	0.0338036	10410/6352/6667/1025/6737/9150/22879/29969/23076/55223	10
GOTERM_BP	GO:0006310	DNA recombination	33/1221	282/18493	0.00100035	0.0338036	3148/6778/5788/6118/3575/5885/4841/23304/10189/56897/165918/472/80762/6421/84464/23064/9400/116138/92797/10432/51149/10213/79677/23514/151987/55317/80198/5965/7158/27301/23529/3146/7040	33
GOTERM_BP	GO:0034637	cellular carbohydrate biosynthetic process	14/1221	83/18493	0.00100595	0.0338036	55454/2683/208/207/8445/2475/2632/2931/54928/90673/5236/89801/2131/55790	14
GOTERM_BP	GO:0000271	polysaccharide biosynthetic process	13/1221	74/18493	0.0010197	0.0340515	55454/208/207/8445/2475/2632/2931/90673/5236/89801/2131/55790/7040	13
GOTERM_BP	GO:0006475	internal protein amino acid acetylation	22/1221	163/18493	0.0010873	0.0358608	23558/8861/6881/339287/6872/55209/2648/84289/55167/90780/23411/84148/5187/11143/29117/9329/9252/57634/23741/5447/9913/7040	22
GOTERM_BP	GO:0042093	T-helper cell differentiation	11/1221	57/18493	0.00109965	0.0360454	6778/602/5971/64332/51043/10892/114836/54542/2475/6095/3146	11
GOTERM_BP	GO:0016573	histone acetylation	21/1221	153/18493	0.0011247	0.0362159	23558/8861/6881/339287/6872/55209/2648/84289/55167/90780/23411/84148/5187/11143/29117/9329/9252/57634/23741/9913/7040	21
GOTERM_BP	GO:0042147	retrograde transport, endosome to Golgi	14/1221	84/18493	0.00113522	0.0362159	5870/8677/55737/9043/80148/253725/10139/9827/9648/9559/100287171/63893/64145/51542	14
GOTERM_BP	GO:0036336	dendritic cell migration	7/1221	26/18493	0.00116192	0.0365185	3577/6352/1236/5294/7226/708/3146	7
GOTERM_BP	GO:0016482	cytosolic transport	21/1221	154/18493	0.00122319	0.0379971	5870/2060/8677/55737/9043/80148/2580/253725/124997/22853/10139/6272/9827/9648/9559/100287171/63893/54832/64145/164/51542	21
GOTERM_BP	GO:0019884	antigen processing and presentation of exogenous antigen	19/1221	134/18493	0.00128555	0.0396365	3796/3107/972/2207/6892/832/6890/4012/22872/1783/1778/10484/64837/8905/114876/3831/3835/3106/164	19
GOTERM_BP	GO:0010256	endomembrane system organization	43/1221	403/18493	0.00129121	0.0396365	5788/10890/51112/10960/81671/1452/5119/6711/51160/25946/2010/64689/93343/57003/57198/2580/55014/55654/83452/208/5027/9144/399687/388552/23345/55113/274/9648/3064/207/10484/64083/123720/91754/26509/10015/137492/8027/10142/64145/23122/128866/728498	43
GOTERM_BP	GO:0010507	negative regulation of autophagy	13/1221	76/18493	0.0013168	0.0399752	1982/51520/3162/1611/10193/207/100287171/23274/2475/7249/128866/257397/56893	13
GOTERM_BP	GO:0034976	response to endoplasmic reticulum stress	31/1221	264/18493	0.00132438	0.0399782	468/4217/1388/578/23645/10961/5034/57003/9601/7844/22872/2137/92305/2081/23411/6400/116138/5366/267/1200/10956/54788/2931/54557/51060/56886/8795/55757/9354/54431/8720	31
GOTERM_BP	GO:0051651	maintenance of location in cell	15/1221	95/18493	0.00135858	0.0406192	2495/602/10210/81573/55187/2548/11344/23345/207/64083/10956/54832/10142/6500/9913	15
GOTERM_BP	GO:0043543	protein acylation	29/1221	242/18493	0.00136349	0.0406192	23558/57551/8861/6881/339287/6872/55209/5494/5495/2648/84289/55167/90780/23411/84148/253832/55625/5187/11143/29117/254359/9329/9252/57634/80155/23741/5447/9913/7040	29
GOTERM_BP	GO:0018394	peptidyl-lysine acetylation	22/1221	166/18493	0.00138363	0.0406194	23558/8861/6881/339287/6872/55209/2648/84289/55167/90780/23411/84148/5187/11143/29117/9329/9252/57634/23741/5447/9913/7040	22
GOTERM_BP	GO:0010212	response to ionizing radiation	20/1221	146/18493	0.001494	0.0424597	51720/5788/3428/598/1936/578/9112/165918/3735/472/84328/1788/23411/9400/51149/23514/4193/2140/7158/7040	20
GOTERM_BP	GO:0033692	cellular polysaccharide biosynthetic process	12/1221	68/18493	0.00150988	0.0426841	55454/208/207/8445/2475/2632/2931/90673/5236/89801/2131/55790	12
GOTERM_BP	GO:0030041	actin filament polymerization	23/1221	178/18493	0.00153634	0.0432035	10095/832/51734/10435/6711/1236/2185/9535/91663/253725/10602/9113/8522/11344/274/100287171/123720/2475/11078/253260/6710/55604/348110	23
GOTERM_BP	GO:0006606	protein import into nucleus	21/1221	157/18493	0.00156416	0.0435276	2316/602/29107/4088/9972/23636/8841/10628/473/11142/23411/30000/207/100101267/57122/29969/23633/7249/5901/8720/7040	21
GOTERM_BP	GO:0007033	vacuole organization	21/1221	157/18493	0.00156416	0.0435276	81671/23130/4124/55737/80208/55014/83452/2548/5027/23241/58476/79158/55858/5287/1200/57154/7942/55102/128866/54664/8720	21
GOTERM_BP	GO:0006892	post-Golgi vesicle-mediated transport	15/1221	97/18493	0.00168398	0.0452953	10890/6845/6711/2060/2580/10139/6272/64083/6102/4644/54832/55770/64145/164/51542	15
GOTERM_BP	GO:0039702	viral budding via host ESCRT complex	6/1221	21/18493	0.00187706	0.048522	5119/51160/93343/10015/137492/128866	6
GOTERM_BP	GO:0007052	mitotic spindle organization	16/1221	108/18493	0.00189962	0.0487964	3796/2316/5119/8658/23636/440145/1778/85378/10844/10274/8243/5116/23122/5901/6905/128866	16
GOTERM_BP	GO:0006605	protein targeting	8/37	424/18493	1.54038e-06	0.0017052	3312/6218/6187/3920/7316/51304/54471/5824	8
GOTERM_BP	GO:0006401	RNA catabolic process	6/37	340/18493	5.31013e-05	0.0195944	3312/6218/6187/7832/7316/4939	6
GOTERM_BP	GO:0016055	Wnt signaling pathway	6/37	463/18493	0.000286793	0.0406126	2869/5499/3611/7316/83999/51741	6
GOTERM_BP	GO:0198738	cell-cell signaling by wnt	6/37	465/18493	0.000293497	0.0406126	2869/5499/3611/7316/83999/51741	6
GOTERM_BP	GO:0006612	protein targeting to membrane	5/37	198/18493	4.41341e-05	0.0195944	6218/6187/51304/54471/5824	5
GOTERM_BP	GO:0006402	mRNA catabolic process	5/37	307/18493	0.000344073	0.042321	3312/6218/6187/7832/7316	5
GOTERM_BP	GO:0090150	establishment of protein localization to membrane	5/37	317/18493	0.000398504	0.0441144	6218/6187/51304/54471/5824	5
GOTERM_BP	GO:0072321	chaperone-mediated protein transport	2/37	10/18493	0.000173516	0.0406126	3312/5824	2
GOTERM_BP	GO:2001241	positive regulation of extrinsic apoptotic signaling pathway in absence of ligand	2/37	11/18493	0.000211808	0.0406126	5499/51741	2
GOTERM_BP	GO:0061684	chaperone-mediated autophagy	2/37	12/18493	0.000253849	0.0406126	3312/3920	2
GOTERM_MF	GO:0019787	ubiquitin-like protein transferase activity	54/1230	421/17632	1.02055e-05	0.00493945	55294/10616/51564/144699/9039/57162/7323/51070/54620/6872/223082/23304/10210/8916/997/92912/9759/10193/165918/11060/10116/7844/6737/9040/55743/10892/92305/55167/51588/7321/150726/25831/50862/283450/54542/23759/267/8924/91694/63893/57154/4193/25820/54778/64839/81858/6500/8065/9354/25897/9781/6477/55223/2188	54
GOTERM_MF	GO:0004842	ubiquitin-protein transferase activity	50/1230	396/17632	3.27021e-05	0.0105519	55294/10616/144699/57162/7323/51070/54620/6872/223082/23304/10210/8916/997/92912/10193/165918/11060/10116/7844/6737/9040/55743/10892/92305/55167/7321/150726/25831/50862/283450/54542/23759/267/8924/91694/63893/57154/4193/25820/54778/64839/81858/6500/8065/9354/25897/9781/6477/55223/2188	50
GOTERM_MF	GO:0004674	protein serine/threonine kinase activity	53/1230	455/17632	0.000163794	0.0264254	81788/57551/896/5567/4217/9262/57162/51422/23476/1452/6872/55437/7048/2185/3985/5294/1025/6789/5571/8895/472/51765/2580/5062/23012/208/5613/22853/2081/9113/613/4831/7204/375449/5218/9748/207/5608/8445/5257/10645/11213/150094/6733/91754/2475/817/2931/9252/55589/146057/8550/4052	53
GOTERM_MF	GO:0005096	GTPase activator activity	36/1230	279/17632	0.000260451	0.0360167	6001/9138/9938/9744/10636/10435/51520/64744/5902/9605/116986/28964/23526/79658/8853/192111/23232/6654/9826/4943/613/23527/57186/10484/79874/6102/1122/23380/396/10144/57148/7249/201176/9693/8831/9882	36
GOTERM_MF	GO:0015037	peptide disulfide oxidoreductase activity	6/1230	15/17632	0.000329245	0.0398386	2936/5034/9601/10539/51060/51218	6
GOTERM_MF	GO:0043021	ribonucleoprotein complex binding	24/1230	128/17632	7.54213e-06	0.00493945	7458/10421/10289/5935/8531/54915/24148/3954/6731/6632/1655/2107/55147/708/2475/4193/342618/60678/253260/80315/80155/9887/6059/84295	24
GOTERM_MF	GO:0042393	histone binding	29/1230	195/17632	8.80452e-05	0.0213069	5757/51720/23476/5927/6872/8658/54799/165918/114825/84289/57680/90780/23411/84148/5253/8467/54454/81611/6595/11143/29117/727866/10765/7158/4300/10927/6907/29057/84295	29
GOTERM_MF	GO:0140030	modification-dependent protein binding	23/1230	142/17632	0.00012625	0.0244421	51720/55793/23476/5927/6872/2060/54799/165918/124997/84289/57680/84148/5253/54454/29117/727866/10765/81858/7158/4300/10927/29057/56893	23
GOTERM_CC	GO:0005765	lysosomal membrane	43/1277	344/19659	2.86567e-05	0.00207735	972/10410/79026/10970/6845/9725/7311/79036/4012/223082/2683/55737/55717/79803/80208/56928/8895/51606/23250/51382/124997/2548/9842/201475/6272/8417/10396/79888/8905/59345/55858/7226/92979/23274/2475/84888/2773/55317/164/54664/53373/6560/401258	43
GOTERM_CC	GO:0034708	methyltransferase complex	18/1277	116/19659	0.000484337	0.0112901	4149/23135/6628/63925/5927/6872/2145/130557/57680/23411/6632/84148/26168/79084/1207/6636/10765/11108	18
GOTERM_CC	GO:0000151	ubiquitin ligase complex	31/1277	275/19659	0.00197592	0.0318029	10048/55294/10616/144699/51646/7323/54620/339745/23304/79269/10210/51343/165918/11060/8816/54876/25852/6737/7321/6400/8445/10956/90268/25820/64839/81858/6500/8065/9354/25897/9781	31
GOTERM_CC	GO:1904949	ATPase complex	15/1277	102/19659	0.00239257	0.0366547	55249/9219/6599/9112/6603/10347/11194/8467/81611/476/26060/6595/6604/57634/23506	15
GOTERM_CC	GO:0101002	ficolin-1-rich granule	31/1277	185/19659	1.04239e-06	0.000704658	2495/226/2207/11314/823/1604/23218/3101/51646/22918/3614/7077/2950/8778/9535/1315/5265/4860/2548/5049/116844/4831/124583/5709/7226/10213/5713/5236/23406/3146/2219	31
GOTERM_CC	GO:0016605	PML body	20/1277	98/19659	4.03614e-06	0.00136421	4149/29855/6118/10636/4778/10210/9683/1025/56478/2000/11262/55743/51588/23411/58476/79677/59343/7874/2475/54778	20
GOTERM_CC	GO:0010008	endosome membrane	55/1277	462/19659	1.00155e-05	0.00199263	3107/10410/10890/9744/6845/7311/9784/93380/7323/5119/2060/51160/223082/124460/5867/11021/55737/93343/79666/79803/56928/78992/80762/253725/124997/9842/54521/533/201475/10347/9727/23527/6272/8417/81609/9559/100287171/26060/55858/23274/84888/55317/137492/22841/8992/8027/3106/64145/57732/128866/257397/22876/54664/9781/53373	55
GOTERM_CC	GO:0005681	spliceosomal complex	28/1277	179/19659	1.31445e-05	0.00199263	3190/26986/6628/7536/11157/9092/5935/5976/10189/51322/51503/8449/10492/58509/22913/1665/24148/3183/10236/6632/1655/84950/55660/6636/9129/51362/55131/57703	28
GOTERM_CC	GO:1904813	ficolin-1-rich granule lumen	22/1277	124/19659	1.47384e-05	0.00199263	2495/226/823/3101/51646/3614/7077/2950/9535/5265/4860/5049/116844/4831/124583/5709/10213/5713/5236/23406/3146/2219	22
GOTERM_CC	GO:0016607	nuclear speck	47/1277	382/19659	1.87496e-05	0.00207735	10970/8525/4303/10421/3428/29107/9092/1452/4841/54890/64332/10189/51322/51503/8241/10210/1609/10482/997/58509/56478/50809/1665/24148/2034/9879/6421/9698/84441/10432/6651/79677/3835/55660/8930/4929/57634/54439/163486/9129/55105/55589/143684/57703/5501/55604/2908	47
GOTERM_CC	GO:0005774	vacuolar membrane	48/1277	397/19659	2.42315e-05	0.00207735	972/10410/79026/10970/6845/9725/7311/79036/81671/4012/223082/2683/55737/55717/79803/80208/56928/8895/63908/51606/23250/55014/51382/124997/9583/2548/9842/533/201475/6272/8417/10396/79888/8905/59345/55858/7226/92979/23274/2475/84888/2773/55317/164/54664/53373/6560/401258	48
GOTERM_CC	GO:0036464	cytoplasmic ribonucleoprotein granule	30/1277	207/19659	2.99155e-05	0.00207735	4154/3190/203068/26986/10970/26065/11157/8651/60489/8994/5976/64332/9513/677/1025/56478/192670/6737/23589/9698/57532/26019/23345/55147/54542/53339/4691/23741/23185/23112	30
GOTERM_CC	GO:0098852	lytic vacuole membrane	43/1277	345/19659	3.073e-05	0.00207735	972/10410/79026/10970/6845/9725/7311/79036/4012/223082/2683/55737/55717/79803/80208/56928/8895/51606/23250/51382/124997/2548/9842/201475/6272/8417/10396/79888/8905/59345/55858/7226/92979/23274/2475/84888/2773/55317/164/54664/53373/6560/401258	43
GOTERM_CC	GO:0071013	catalytic step 2 spliceosome	17/1277	87/19659	3.78552e-05	0.00232637	3190/26986/6628/9092/10189/51503/10492/58509/22913/24148/3183/10236/6632/1655/6636/51362/57703	17
GOTERM_CC	GO:0000775	chromosome, centromeric region	28/1277	194/19659	5.8551e-05	0.00329837	8379/5885/51112/1452/23157/8658/5515/1788/1783/84148/23047/5253/348995/9184/10274/23244/11243/57122/9770/3835/8243/23122/5518/7158/5501/147841/84295/253635	28
GOTERM_CC	GO:0035770	ribonucleoprotein granule	30/1277	219/19659	8.67174e-05	0.00448375	4154/3190/203068/26986/10970/26065/11157/8651/60489/8994/5976/64332/9513/677/1025/56478/192670/6737/23589/9698/57532/26019/23345/55147/54542/53339/4691/23741/23185/23112	30
GOTERM_CC	GO:0030176	integral component of endoplasmic reticulum membrane	23/1277	149/19659	9.28588e-05	0.00448375	3107/23770/972/6892/1388/6890/93380/6238/84649/56928/54020/2081/23471/8879/7095/267/22845/54788/84888/3106/55331/347734/2131	23
GOTERM_CC	GO:0005793	endoplasmic reticulum-Golgi intermediate compartment	20/1277	123/19659	0.000126092	0.00568253	9262/6892/1604/6890/51112/10960/81671/4121/5034/64689/1315/5265/55014/399687/4924/123720/57222/56886/55757/3146	20
GOTERM_CC	GO:0098687	chromosomal region	41/1277	346/19659	0.000143918	0.00581198	8379/6118/5885/51112/1452/5976/10189/56897/23157/8658/5515/472/26277/80351/5424/84464/1788/23064/1783/84148/23047/5253/348995/9184/10274/23244/79677/11243/57122/9770/3835/8243/80169/23122/5518/7158/9878/5501/147841/84295/253635	41
GOTERM_CC	GO:0034399	nuclear periphery	21/1277	134/19659	0.000148108	0.00581198	6678/468/9782/5885/5119/4841/9612/9972/1609/26277/6421/1788/51588/84148/30000/10274/57122/8243/55660/6310/26012	21
GOTERM_CC	GO:0070820	tertiary granule	24/1277	164/19659	0.000154757	0.00581198	2495/226/2207/1265/11314/1604/9725/23218/51646/22918/7077/8778/1315/23250/25852/2548/116844/8417/124583/7226/126014/5236/81619/5473	24
GOTERM_CC	GO:0031227	intrinsic component of endoplasmic reticulum membrane	23/1277	157/19659	0.000206973	0.00721905	3107/23770/972/6892/1388/6890/93380/6238/84649/56928/54020/2081/23471/8879/7095/267/22845/54788/84888/3106/55331/347734/2131	23
GOTERM_CC	GO:0005769	early endosome	40/1277	341/19659	0.000213581	0.00721905	3107/933/9784/93380/5119/2060/4012/51160/124460/5867/55737/79666/79803/23250/253725/124997/55654/208/22853/10347/57561/6272/8417/4924/81609/9559/100287171/79874/8073/26060/55858/4644/91947/8027/3106/64145/57732/3146/22876/6477	40
GOTERM_CC	GO:0034774	secretory granule lumen	38/1277	321/19659	0.000252709	0.0079897	6678/226/203068/25801/1265/3101/10577/10383/2588/7423/87/3614/7077/2950/9535/23526/5265/4860/25852/5049/116844/4831/1778/124583/5709/10213/126014/5713/23593/3959/23406/1774/3146/7040/5473/22915/7424/2219	38
GOTERM_CC	GO:0005635	nuclear envelope	50/1277	461/19659	0.00026002	0.0079897	203068/6778/8379/598/9782/29107/171389/5902/26173/9112/4088/9972/2010/10482/8658/51343/23636/3930/79004/11262/80351/5027/2081/25972/169714/23411/30000/6272/23345/274/348995/9801/9123/84950/100101267/59343/51096/57122/26509/54788/6720/10128/727866/26012/23633/3710/5901/128866/10927/29057	50
GOTERM_CC	GO:0000790	nuclear chromatin	42/1277	369/19659	0.000288294	0.00818973	23558/3190/3148/4149/6778/10365/3659/8861/6667/55249/9219/6599/6872/25946/9112/57658/9612/4088/6603/6722/1025/6925/2648/3183/84464/1788/23411/84148/138151/116138/8338/8467/81611/26060/6595/6604/64426/11143/57634/23506/26012/3146	42
GOTERM_CC	GO:0000932	P-body	15/1277	84/19659	0.000302874	0.00818973	26065/11157/60489/8994/5976/677/56478/192670/6737/23589/9698/23345/54542/53339/23112	15
GOTERM_CC	GO:0017053	transcriptional repressor complex	15/1277	84/19659	0.000302874	0.00818973	5971/6667/9219/9112/9612/9759/8841/23411/55758/8467/23186/26060/1488/6907/3146	15
GOTERM_CC	GO:0005802	trans-Golgi network	29/1277	225/19659	0.000325407	0.00846059	972/10890/5870/6845/79090/8677/55717/80148/78992/23250/56548/84342/55627/201475/10139/10396/399687/9827/9648/4924/636/64083/122618/8905/55858/92979/23122/164/51542	29
GOTERM_CC	GO:0000776	kinetochore	20/1277	133/19659	0.000369395	0.00924855	8379/51112/1452/23157/1783/84148/5253/348995/9184/11243/57122/9770/3835/8243/23122/7158/5501/147841/84295/253635	20
GOTERM_CC	GO:0030667	secretory granule membrane	35/1277	295/19659	0.00041706	0.010069	6678/2207/10970/3577/5788/10890/5870/11314/1604/6845/9725/23218/84329/22918/27180/334/8778/2683/259215/1315/8895/23250/51382/2548/64924/8694/10396/79888/3163/7226/5795/3710/10184/81619/401258	35
GOTERM_CC	GO:0016363	nuclear matrix	17/1277	108/19659	0.000580685	0.0130848	6678/9782/5885/5119/4841/9612/1609/26277/6421/1788/51588/84148/10274/8243/55660/6310/26012	17
GOTERM_CC	GO:0034709	methylosome	5/1277	12/19659	0.000617991	0.0134762	6628/6632/79084/1207/6636	5
GOTERM_CC	GO:0060205	cytoplasmic vesicle lumen	38/1277	338/19659	0.000694127	0.0144198	6678/226/203068/25801/1265/3101/10577/10383/2588/7423/87/3614/7077/2950/9535/23526/5265/4860/25852/5049/116844/4831/1778/124583/5709/10213/126014/5713/23593/3959/23406/1774/3146/7040/5473/22915/7424/2219	38
GOTERM_CC	GO:1904724	tertiary granule lumen	11/1277	55/19659	0.000703923	0.0144198	2495/226/1265/51646/7077/25852/116844/124583/126014/5236/5473	11
GOTERM_CC	GO:0031983	vesicle lumen	38/1277	339/19659	0.000734116	0.014596	6678/226/203068/25801/1265/3101/10577/10383/2588/7423/87/3614/7077/2950/9535/23526/5265/4860/25852/5049/116844/4831/1778/124583/5709/10213/126014/5713/23593/3959/23406/1774/3146/7040/5473/22915/7424/2219	38
GOTERM_CC	GO:0031901	early endosome membrane	20/1277	143/19659	0.000949449	0.0183379	3107/93380/2060/124460/5867/79666/79803/253725/124997/10347/8417/81609/100287171/26060/55858/8027/3106/64145/57732/22876	20
GOTERM_CC	GO:0000922	spindle pole	21/1277	154/19659	0.00100042	0.0187857	3796/8379/10636/808/51646/10101/2010/10210/8658/23636/5515/9150/9113/9731/85378/10844/10274/8243/23005/11186/10300	21
GOTERM_CC	GO:0000777	condensed chromosome kinetochore	16/1277	104/19659	0.00107153	0.0195772	8379/1452/23157/5253/348995/9184/11243/57122/9770/8243/23122/7158/5501/147841/84295/253635	16
GOTERM_CC	GO:0005795	Golgi stack	20/1277	145/19659	0.0011309	0.0201181	55454/2530/55959/4124/2683/78992/11313/8853/6272/23268/4924/64083/124583/92979/55512/22856/10142/8720/55790/728498	20
GOTERM_CC	GO:0031965	nuclear membrane	34/1277	302/19659	0.00126077	0.0218533	6778/598/9782/171389/26173/4088/9972/2010/8658/51343/23636/3930/79004/5027/2081/25972/169714/23411/30000/6272/23345/9801/9123/84950/100101267/59343/51096/57122/26509/54788/10128/26012/3710/10927	34
GOTERM_CC	GO:0015629	actin cytoskeleton	49/1277	483/19659	0.00131295	0.0221889	226/3190/2316/7402/79026/1265/9262/10095/7169/10398/9948/832/64098/24138/51734/6868/6711/10801/7171/87/91663/9696/9759/7739/23433/56928/3183/10602/23012/57727/23607/8522/11344/399687/4046/274/1398/26512/4644/23384/11078/10015/6710/92521/31/5236/23002/55604/57565	49
GOTERM_CC	GO:0005684	U2-type spliceosomal complex	13/1277	78/19659	0.00145596	0.0240057	6628/11157/9092/51503/1665/24148/6632/84950/55660/6636/9129/51362/57703	13
GOTERM_CC	GO:0005770	late endosome	28/1277	243/19659	0.0023137	0.0363735	973/972/10410/338692/6845/5119/51160/55737/93343/78992/124997/1783/22879/8417/3064/100287171/55858/23274/114876/4644/84888/55317/79443/137492/9693/128866/57498/54664	28
GOTERM_CC	GO:0000793	condensed chromosome	26/1277	221/19659	0.00244003	0.0366547	3148/8379/6118/23476/5885/1452/5119/23157/5253/8467/348995/9184/10274/79677/11243/57122/9770/8243/10128/23122/7158/5501/3146/147841/84295/253635	26
GOTERM_CC	GO:0055037	recycling endosome	21/1277	167/19659	0.00276821	0.0406807	3107/3688/10890/9744/80223/933/5867/11021/23250/22853/201475/9727/8417/100287171/4644/23080/22841/3106/164/5901/22876	21
GOTERM_CC	GO:0044450	microtubule organizing center part	22/1277	179/19659	0.00296465	0.0426405	3796/132320/10101/27241/10210/8658/9696/440145/80351/3064/100287171/9731/85378/6102/8924/10844/9857/5116/153241/10300/5901/146057	22
GOTERM_CC	GO:0070603	SWI/SNF superfamily-type complex	12/1277	76/19659	0.00347757	0.048929	55249/9219/6599/9112/6603/8467/81611/26060/6595/6604/57634/23506	12
GOTERM_CC	GO:0044322	endoplasmic reticulum quality control compartment	6/1277	24/19659	0.00362329	0.048929	7844/6400/267/10956/56886/55757	6
GOTERM_CC	GO:0042581	specific granule	20/1277	160/19659	0.00368989	0.048929	1265/10970/9725/84329/22918/7077/23250/25852/51382/116844/8694/10396/3163/124583/7226/126014/5795/1774/81619/401258	20
GOTERM_CC	GO:0000779	condensed chromosome, centromeric region	16/1277	117/19659	0.00369139	0.048929	8379/1452/23157/5253/348995/9184/11243/57122/9770/8243/23122/7158/5501/147841/84295/253635	16
GOTERM_CC	GO:0015629	actin cytoskeleton	32/646	483/19659	0.000147668	0.0178618	7791/5914/71/79026/9262/1265/103910/64098/399687/10603/2268/9344/87/91663/9696/10801/56928/9181/3183/6455/10015/51411/4046/9759/4644/23384/26512/4637/10602/55604/7414/57565	32
GOTERM_CC	GO:0005635	nuclear envelope	30/646	461/19659	0.00031933	0.0257745	8379/6778/598/29107/5902/240/10482/2010/23225/8658/4927/83860/30000/7112/51343/25972/169714/5027/2081/80314/10128/348995/26509/55787/727866/3710/29057/3708/3267/55161	30
GOTERM_CC	GO:0005774	vacuolar membrane	28/646	397/19659	0.000135101	0.0178618	972/79026/3127/160/6845/10970/81671/2683/80208/81631/55717/2548/56928/968/1601/63908/124997/51382/3920/20/92979/1186/84888/55317/23324/2773/6560/22863	28
GOTERM_CC	GO:0016607	nuclear speck	26/646	382/19659	0.000400959	0.0283178	8106/8525/102724594/9263/29107/3428/22985/10482/51322/6426/10970/56478/1609/8241/9092/10929/23198/55589/3835/8930/57634/143684/55105/5501/2908/55604	26
GOTERM_CC	GO:0005925	focal adhesion	26/646	402/19659	0.000856038	0.0368754	6218/7791/71/26986/79026/2314/5788/1265/3676/64098/87/975/1601/9181/6160/10015/10890/2697/157285/79798/3685/726/3371/5501/1465/7414	26
GOTERM_CC	GO:0005924	cell-substrate adherens junction	26/646	405/19659	0.00095342	0.0368754	6218/7791/71/26986/79026/2314/5788/1265/3676/64098/87/975/1601/9181/6160/10015/10890/2697/157285/79798/3685/726/3371/5501/1465/7414	26
GOTERM_CC	GO:0030055	cell-substrate junction	26/646	409/19659	0.00109815	0.0368754	6218/7791/71/26986/79026/2314/5788/1265/3676/64098/87/975/1601/9181/6160/10015/10890/2697/157285/79798/3685/726/3371/5501/1465/7414	26
GOTERM_CC	GO:0005765	lysosomal membrane	23/646	344/19659	0.00107636	0.0368754	972/79026/3127/160/6845/10970/2683/80208/55717/2548/56928/968/1601/124997/51382/3920/20/92979/1186/84888/55317/2773/6560	23
GOTERM_CC	GO:0098852	lytic vacuole membrane	23/646	345/19659	0.00111861	0.0368754	972/79026/3127/160/6845/10970/2683/80208/55717/2548/56928/968/1601/124997/51382/3920/20/92979/1186/84888/55317/2773/6560	23
GOTERM_CC	GO:0005802	trans-Golgi network	22/646	225/19659	5.45094e-06	0.00307978	972/3127/399687/6845/5870/83696/8677/7045/10133/56548/55717/78992/80148/10139/10890/55627/8674/92979/10565/122618/80262/10079	22
GOTERM_CC	GO:0030667	secretory granule membrane	21/646	295/19659	0.000796443	0.0368754	7305/5788/3683/79930/6845/5870/334/10970/2683/2548/968/51382/8694/10890/3920/3685/3710/3708/10184/158747/135228	21
GOTERM_CC	GO:0005770	late endosome	18/646	243/19659	0.00117479	0.0368754	972/3127/338692/6845/51160/78992/124997/22879/3920/100287171/285195/3064/85377/4644/137492/84888/55317/114876	18
GOTERM_CC	GO:0005681	spliceosomal complex	15/646	179/19659	0.000863142	0.0368754	26986/3181/102724594/5935/51322/6426/7536/9092/10236/51639/3183/25804/11157/1655/85437	15
GOTERM_CC	GO:0005776	autophagosome	11/646	89/19659	0.000158069	0.0178618	2495/5305/81671/58476/10133/81631/124997/3920/100287171/3064/22863	11
GOTERM_CC	GO:0031091	platelet alpha granule	11/646	91/19659	0.000193073	0.018181	6845/87/334/7423/54863/5265/10184/135228/139322/7040/22915	11
GOTERM_CC	GO:0042641	actomyosin	10/646	71/19659	0.000103753	0.0178618	7791/1265/103910/399687/10603/87/10801/10015/9759/4644	10
GOTERM_CC	GO:0005643	nuclear pore	10/646	88/19659	0.000615846	0.0368754	8379/29107/5902/10482/23225/8658/4927/348995/3267/55161	10
GOTERM_CC	GO:0044322	endoplasmic reticulum quality control compartment	5/646	24/19659	0.000953935	0.0368754	7844/6400/10956/80267/55757	5
GOTERM_CC	GO:0005925	focal adhesion	6/37	402/19659	9.57315e-05	0.00568297	3312/6218/6840/6187/10109/3611	6
GOTERM_CC	GO:0005924	cell-substrate adherens junction	6/37	405/19659	9.97188e-05	0.00568297	3312/6218/6840/6187/10109/3611	6
GOTERM_CC	GO:0030055	cell-substrate junction	6/37	409/19659	0.00010524	0.00568297	3312/6218/6840/6187/10109/3611	6
GOTERM_CC	GO:0101002	ficolin-1-rich granule	4/37	185/19659	0.000393305	0.0159288	3312/3920/23406/5718	4
GOTERM_CC	GO:1904813	ficolin-1-rich granule lumen	3/37	124/19659	0.0016273	0.0376603	3312/23406/5718	3
GOTERM_CC	GO:0043034	costamere	2/37	19/19659	0.000577615	0.0187147	6840/3611	2
GOTERM_CC	GO:0002102	podosome	2/37	30/19659	0.00145034	0.0376603	6455/6840	2
KEGG_PATHWAY	hsa04120	Ubiquitin mediated proteolysis	23/611	137/7839	0.00034044	0.0248521	55294/9039/7323/9021/8651/8916/997/51343/92912/11060/9040/51588/7321/23759/8924/63893/57154/4193/6500/55236/8065/9354/6477	23
KEGG_PATHWAY	hsa04141	Protein processing in endoplasmic reticulum	32/611	165/7839	1.06263e-06	0.000310287	468/10970/4217/823/1388/3337/7323/10960/6238/578/23645/10961/4121/5034/9601/22872/2081/23471/7321/6400/7095/10484/267/573/10956/54788/56886/6500/55757/54431/56893/8720	32
KEGG_PATHWAY	hsa04144	Endocytosis	40/611	244/7839	4.48997e-06	0.000655536	3107/3577/10890/10095/9744/832/64744/80223/5119/2060/51160/4088/5867/7048/58513/11021/116986/55737/28964/93343/10193/253725/84612/8853/9727/23527/9266/274/56904/9559/100287171/57154/4193/10015/137492/22841/8027/3106/64145/128866	40
KEGG_PATHWAY	hsa04910	Insulin signaling pathway	24/611	137/7839	0.000129833	0.0126371	5567/808/3101/51422/9021/8651/2194/5571/122809/23433/208/6654/207/1399/5257/1398/2475/5140/6720/90673/31/7249/89801/5501	24
KEGG_PATHWAY	hsa05163	Human cytomegalovirus infection	32/611	225/7839	0.00060325	0.0293582	3107/468/9138/7132/5567/6892/6352/1388/808/6890/6667/113/3570/578/2185/54331/5331/208/6654/9826/207/1399/5608/59345/1398/2475/4193/2773/3106/5533/7249/3710	32
KEGG_PATHWAY	hsa05170	Human immunodeficiency virus 1 infection	31/611	212/7839	0.000451328	0.0263575	3107/7132/6892/598/808/6890/200315/60489/578/2185/3985/54331/472/5336/5062/208/5335/207/1399/5608/8905/59345/1398/2475/2773/3106/5533/3710/164/6500/8065	31

## Sheet: total_down
Supplementary Table S5 The significant pathways enriched by DEGs between different HSPN types
Category	ID	Description	GeneRatio	BgRatio	pvalue	FDR	geneID	Count
GOTERM_BP	GO:0006401	RNA catabolic process	7/43	340/18493	1.21766e-05	0.000995438	6129/6204/6157/6188/6176/6205/7534	7
GOTERM_BP	GO:0000956	nuclear-transcribed mRNA catabolic process	6/43	207/18493	7.89621e-06	0.000704198	6129/6204/6157/6188/6176/6205	6
GOTERM_BP	GO:0033119	negative regulation of RNA splicing	3/43	25/18493	2.59881e-05	0.0019611	7009/3181/3190	3
GOTERM_BP	GO:0045047	protein targeting to ER	6/43	117/18493	2.83863e-07	5.66418e-05	6129/6204/6157/6188/6176/6205	6
GOTERM_BP	GO:0006413	translational initiation	7/43	194/18493	2.93713e-07	5.66418e-05	6129/6204/6157/6188/6176/1982/6205	7
GOTERM_BP	GO:0006402	mRNA catabolic process	7/43	307/18493	6.2634e-06	0.000682711	6129/6204/6157/6188/6176/6205/7534	7
GOTERM_BP	GO:0090150	establishment of protein localization to membrane	7/43	317/18493	7.72248e-06	0.000704198	6129/6204/6157/6188/6176/6205/7534	7
GOTERM_BP	GO:0006605	protein targeting	7/43	424/18493	5.00559e-05	0.00350749	6129/6204/6157/6188/6176/6205/7534	7
GOTERM_BP	GO:0006614	SRP-dependent cotranslational protein targeting to membrane	6/43	105/18493	1.4911e-07	5.66418e-05	6129/6204/6157/6188/6176/6205	6
GOTERM_BP	GO:0006613	cotranslational protein targeting to membrane	6/43	109/18493	1.86338e-07	5.66418e-05	6129/6204/6157/6188/6176/6205	6
GOTERM_BP	GO:0000184	nuclear-transcribed mRNA catabolic process, nonsense-mediated decay	6/43	120/18493	3.29821e-07	5.66418e-05	6129/6204/6157/6188/6176/6205	6
GOTERM_BP	GO:0072599	establishment of protein localization to endoplasmic reticulum	6/43	121/18493	3.46433e-07	5.66418e-05	6129/6204/6157/6188/6176/6205	6
GOTERM_BP	GO:0070972	protein localization to endoplasmic reticulum	6/43	146/18493	1.04674e-06	0.000146694	6129/6204/6157/6188/6176/6205	6
GOTERM_BP	GO:0006612	protein targeting to membrane	6/43	198/18493	6.12146e-06	0.000682711	6129/6204/6157/6188/6176/6205	6
GOTERM_BP	GO:0033631	cell-cell adhesion mediated by integrin	2/43	15/18493	0.000543965	0.0355753	3688/83706	2
GOTERM_BP	GO:0006605	protein targeting	6/39	424/18493	0.000240928	0.0352671	6232/11154/6203/7316/6224/9349	6
GOTERM_BP	GO:0006614	SRP-dependent cotranslational protein targeting to membrane	4/39	105/18493	6.92625e-05	0.023982	6232/6203/6224/9349	4
GOTERM_BP	GO:0006613	cotranslational protein targeting to membrane	4/39	109/18493	8.01218e-05	0.023982	6232/6203/6224/9349	4
GOTERM_BP	GO:0045047	protein targeting to ER	4/39	117/18493	0.000105488	0.023982	6232/6203/6224/9349	4
GOTERM_BP	GO:0000184	nuclear-transcribed mRNA catabolic process, nonsense-mediated decay	4/39	120/18493	0.000116354	0.023982	6232/6203/6224/9349	4
GOTERM_BP	GO:0072599	establishment of protein localization to endoplasmic reticulum	4/39	121/18493	0.00012015	0.023982	6232/6203/6224/9349	4
GOTERM_BP	GO:0070972	protein localization to endoplasmic reticulum	4/39	146/18493	0.000247364	0.0352671	6232/6203/6224/9349	4
GOTERM_BP	GO:2000058	regulation of ubiquitin-dependent protein catabolic process	9/131	147/18493	1.02826e-06	0.00255008	6613/57805/7874/9529/64110/6599/5728/9349/2185	9
GOTERM_BP	GO:0042176	regulation of protein catabolic process	13/131	375/18493	2.67346e-06	0.00331509	6613/57805/7874/9529/2534/9554/64110/6599/7879/5709/5728/9349/2185	13
GOTERM_BP	GO:1903050	regulation of proteolysis involved in cellular protein catabolic process	9/131	209/18493	1.82065e-05	0.0123761	6613/57805/7874/9529/64110/6599/5728/9349/2185	9
GOTERM_BP	GO:2000059	negative regulation of ubiquitin-dependent protein catabolic process	5/131	47/18493	1.99614e-05	0.0123761	57805/7874/9529/6599/9349	5
GOTERM_BP	GO:1903362	regulation of cellular protein catabolic process	9/131	242/18493	5.73689e-05	0.028455	6613/57805/7874/9529/64110/6599/5728/9349/2185	9
GOTERM_BP	GO:0032435	negative regulation of proteasomal ubiquitin-dependent protein catabolic process	4/131	34/18493	9.45851e-05	0.0390952	57805/7874/9529/6599	4
GOTERM_MF	GO:0045296	cadherin binding	7/42	323/17632	1.00909e-05	0.000544908	51429/6624/5216/1982/7534/3688/3190	7
GOTERM_MF	GO:0008253	5'-nucleotidase activity	2/42	13/17632	0.000424936	0.0172099	4907/51251	2
GOTERM_MF	GO:0050839	cell adhesion molecule binding	9/42	486/17632	1.69252e-06	0.000274188	51429/6624/5216/2335/1982/7534/3688/83706/3190	9
GOTERM_MF	GO:0003735	structural constituent of ribosome	6/42	200/17632	7.37695e-06	0.000544908	6129/6204/6157/6188/6176/6205	6
GOTERM_MF	GO:0008252	nucleotidase activity	2/42	15/17632	0.000570303	0.0184778	4907/51251	2
GOTERM_CC	GO:0031093	platelet alpha granule lumen	3/42	67/19659	0.00039495	0.00483813	2335/83706/2162	3
GOTERM_CC	GO:0031091	platelet alpha granule	3/42	91/19659	0.000966568	0.00888034	2335/83706/2162	3
GOTERM_CC	GO:0005925	focal adhesion	12/42	402/19659	2.88676e-11	1.72768e-09	6129/6204/5216/6188/6176/10487/6251/6205/7534/3688/60/3190	12
GOTERM_CC	GO:0005924	cell-substrate adherens junction	12/42	405/19659	3.14653e-11	1.72768e-09	6129/6204/5216/6188/6176/10487/6251/6205/7534/3688/60/3190	12
GOTERM_CC	GO:0030055	cell-substrate junction	12/42	409/19659	3.52589e-11	1.72768e-09	6129/6204/5216/6188/6176/10487/6251/6205/7534/3688/60/3190	12
GOTERM_CC	GO:0022626	cytosolic ribosome	6/42	115/19659	1.55224e-07	5.70448e-06	6129/6204/6157/6188/6176/6205	6
GOTERM_CC	GO:0044391	ribosomal subunit	6/42	191/19659	3.04902e-06	8.96411e-05	6129/6204/6157/6188/6176/6205	6
GOTERM_CC	GO:0044445	cytosolic part	6/42	250/19659	1.42376e-05	0.00031212	6129/6204/6157/6188/6176/6205	6
GOTERM_CC	GO:0005840	ribosome	6/42	276/19659	2.48858e-05	0.000457277	6129/6204/6157/6188/6176/6205	6
GOTERM_CC	GO:0072562	blood microparticle	5/42	147/19659	1.48629e-05	0.00031212	5216/2335/7534/60/2162	5
GOTERM_CC	GO:0015629	actin cytoskeleton	5/42	483/19659	0.0035264	0.028799	6624/10487/60/83706/3190	5
GOTERM_CC	GO:0001726	ruffle	4/42	167/19659	0.000437143	0.00494308	51429/6624/6188/3688	4
GOTERM_CC	GO:0034774	secretory granule lumen	4/42	321/19659	0.0047915	0.0370711	2335/10487/83706/2162	4
GOTERM_CC	GO:0060205	cytoplasmic vesicle lumen	4/42	338/19659	0.00574386	0.0406247	2335/10487/83706/2162	4
GOTERM_CC	GO:0031983	vesicle lumen	4/42	339/19659	0.00580353	0.0406247	2335/10487/83706/2162	4
GOTERM_CC	GO:0098978	glutamatergic synapse	4/42	350/19659	0.00648761	0.043349	5216/7534/3688/60	4
GOTERM_CC	GO:0002102	podosome	3/42	30/19659	3.53633e-05	0.0005776	6624/83706/3190	3
GOTERM_CC	GO:0022627	cytosolic small ribosomal subunit	3/42	45/19659	0.000120872	0.00177682	6204/6188/6205	3
GOTERM_CC	GO:0022625	cytosolic large ribosomal subunit	3/42	63/19659	0.000329344	0.00440123	6129/6157/6176	3
GOTERM_CC	GO:0015935	small ribosomal subunit	3/42	73/19659	0.000508228	0.00514154	6204/6188/6205	3
GOTERM_CC	GO:0015934	large ribosomal subunit	3/42	121/19659	0.00219175	0.0189522	6129/6157/6176	3
GOTERM_CC	GO:0071437	invadopodium	2/42	16/19659	0.000524647	0.00514154	6624/3688	2
GOTERM_CC	GO:0005925	focal adhesion	6/39	402/19659	0.000129799	0.0042211	391/91624/6203/3190/9349/2316	6
GOTERM_CC	GO:0005924	cell-substrate adherens junction	6/39	405/19659	0.00013517	0.0042211	391/91624/6203/3190/9349/2316	6
GOTERM_CC	GO:0030055	cell-substrate junction	6/39	409/19659	0.000142605	0.0042211	391/91624/6203/3190/9349/2316	6
GOTERM_CC	GO:0022626	cytosolic ribosome	4/39	115/19659	7.8032e-05	0.0042211	6232/6203/6224/9349	4
GOTERM_CC	GO:0044391	ribosomal subunit	4/39	191/19659	0.000544328	0.0115086	6232/6203/6224/9349	4
GOTERM_CC	GO:0044445	cytosolic part	4/39	250/19659	0.00148038	0.0202509	6232/6203/6224/9349	4
GOTERM_CC	GO:0005840	ribosome	4/39	276/19659	0.00212436	0.0202509	6232/6203/6224/9349	4
GOTERM_CC	GO:0022627	cytosolic small ribosomal subunit	3/39	45/19659	9.6687e-05	0.0042211	6232/6203/6224	3
GOTERM_CC	GO:0015935	small ribosomal subunit	3/39	73/19659	0.000407832	0.0100599	6232/6203/6224	3
GOTERM_CC	GO:0044450	microtubule organizing center part	3/39	179/19659	0.00533277	0.0464265	22994/3796/5901	3
GOTERM_CC	GO:0018995	host	2/39	29/19659	0.00150513	0.0202509	7316/5901	2
GOTERM_CC	GO:0043657	host cell	2/39	29/19659	0.00150513	0.0202509	7316/5901	2
GOTERM_CC	GO:0002102	podosome	2/39	30/19659	0.00161062	0.0202509	3190/83706	2
GOTERM_CC	GO:0031904	endosome lumen	2/39	34/19659	0.00206677	0.0202509	1508/11154	2
GOTERM_CC	GO:0044215	other organism	2/39	35/19659	0.00218929	0.0202509	7316/5901	2
GOTERM_CC	GO:0044216	other organism cell	2/39	35/19659	0.00218929	0.0202509	7316/5901	2
GOTERM_CC	GO:0044217	other organism part	2/39	35/19659	0.00218929	0.0202509	7316/5901	2
KEGG_PATHWAY	hsa03010	Ribosome	7/28	153/7839	7.89443e-07	5.36821e-05	6129/6204/6157/6188/6176/2197/6205	7
KEGG_PATHWAY	hsa05100	Bacterial invasion of epithelial cells	3/28	74/7839	0.00223308	0.0379623	2335/3688/60	3
KEGG_PATHWAY	hsa05130	Pathogenic Escherichia coli infection	4/28	55/7839	3.91924e-05	0.00133254	81027/7534/3688/60	4
KEGG_PATHWAY	hsa05131	Shigellosis	3/28	65/7839	0.00153736	0.0348468	5216/3688/60	3

## Sheet: up_Type1_vs_Type2
Supplementary Table S5 The significant pathways enriched by DEGs between different HSPN types
Category	ID	Description	GeneRatio	BgRatio	pvalue	FDR	geneID	Count
GOTERM_BP	GO:0002446	neutrophil mediated immunity	67/1221	499/18493	2.12261e-08	1.68712e-05	2495/226/203068/25801/2207/1265/10970/3577/5788/10890/5870/9948/11314/823/1604/6845/9725/23218/3101/51646/6868/84329/10577/10383/22918/27180/2588/3614/7077/2950/8778/2683/9535/23526/1315/8895/5265/23250/4860/25852/51382/2548/5049/116844/8694/613/4831/1778/10396/79888/3163/124583/5709/7226/10213/126014/5713/23593/5795/5236/23406/1774/3146/81619/401258/5473/2219	67
GOTERM_BP	GO:0043312	neutrophil degranulation	65/1221	485/18493	3.70923e-08	2.09148e-05	2495/226/203068/25801/2207/1265/10970/3577/5788/10890/5870/11314/823/1604/6845/9725/23218/3101/51646/84329/10577/10383/22918/27180/2588/3614/7077/2950/8778/2683/9535/23526/1315/8895/5265/23250/4860/25852/51382/2548/5049/116844/8694/613/4831/1778/10396/79888/3163/124583/5709/7226/10213/126014/5713/23593/5795/5236/23406/1774/3146/81619/401258/5473/2219	65
GOTERM_BP	GO:0042119	neutrophil activation	66/1221	498/18493	4.49216e-08	2.09148e-05	2495/226/203068/25801/2207/1265/10970/3577/5788/10890/5870/6352/11314/823/1604/6845/9725/23218/3101/51646/84329/10577/10383/22918/27180/2588/3614/7077/2950/8778/2683/9535/23526/1315/8895/5265/23250/4860/25852/51382/2548/5049/116844/8694/613/4831/1778/10396/79888/3163/124583/5709/7226/10213/126014/5713/23593/5795/5236/23406/1774/3146/81619/401258/5473/2219	66
GOTERM_BP	GO:0002283	neutrophil activation involved in immune response	65/1221	488/18493	4.69732e-08	2.09148e-05	2495/226/203068/25801/2207/1265/10970/3577/5788/10890/5870/11314/823/1604/6845/9725/23218/3101/51646/84329/10577/10383/22918/27180/2588/3614/7077/2950/8778/2683/9535/23526/1315/8895/5265/23250/4860/25852/51382/2548/5049/116844/8694/613/4831/1778/10396/79888/3163/124583/5709/7226/10213/126014/5713/23593/5795/5236/23406/1774/3146/81619/401258/5473/2219	65
GOTERM_BP	GO:0030098	lymphocyte differentiation	47/1221	344/18493	1.66257e-06	0.000423005	3688/973/972/2207/4066/6778/5788/602/3659/3676/5971/3575/6868/9092/3707/8651/578/1236/64332/7048/2185/23240/359948/6722/677/9759/10193/472/2648/80762/51043/4860/5336/23598/10892/6654/1054/114836/54542/4853/2475/96459/6095/5795/23529/3146/7040	47
GOTERM_BP	GO:0046651	lymphocyte proliferation	36/1221	264/18493	2.76874e-05	0.00360449	6188/973/972/896/5788/8379/3659/6352/11314/1604/3575/57162/933/63925/3570/7048/3614/23240/923/5294/2000/472/80762/51043/4860/10892/5027/6654/54542/64844/3572/202309/23529/3146/931/7040	36
GOTERM_BP	GO:0070661	leukocyte proliferation	37/1221	283/18493	5.40944e-05	0.0055582	6188/973/972/896/5788/8379/3659/6352/11314/1604/3575/57162/933/63925/3570/7048/3614/23240/2950/923/5294/2000/472/80762/51043/4860/10892/5027/6654/54542/64844/3572/202309/23529/3146/931/7040	37
GOTERM_BP	GO:0042110	T cell activation	51/1221	451/18493	0.000119097	0.00994274	6188/972/896/2207/6778/5788/8379/602/3659/6352/11314/1604/5971/3575/57162/6868/9092/3707/8651/3570/1236/64332/79865/4088/7048/23240/6722/923/84941/5294/677/2000/2648/80762/51043/4860/23598/10892/5062/5027/6654/114836/9402/207/54542/2475/64844/6095/3572/3146/7040	51
GOTERM_BP	GO:0046631	alpha-beta T cell activation	21/1221	134/18493	0.000184704	0.0137066	6778/5788/602/3659/11314/1604/5971/3707/8651/3570/64332/7048/2000/51043/4860/10892/114836/54542/2475/6095/3146	21
GOTERM_BP	GO:0030183	B cell differentiation	20/1221	125/18493	0.00019576	0.0140169	3688/973/4066/5788/602/3676/6868/578/2185/359948/677/9759/472/5336/10892/1054/4853/96459/5795/23529	20
GOTERM_BP	GO:0042098	T cell proliferation	25/1221	178/18493	0.000280588	0.0164745	6188/896/5788/8379/3659/6352/1604/57162/3570/7048/23240/923/5294/2000/80762/51043/4860/10892/5027/6654/54542/64844/3572/3146/7040	25
GOTERM_BP	GO:0061082	myeloid leukocyte cytokine production	8/1221	28/18493	0.000333256	0.018743	972/2207/10417/3162/79004/23411/11213/7040	8
GOTERM_BP	GO:0030217	T cell differentiation	30/1221	234/18493	0.000371617	0.0196589	972/2207/6778/5788/602/3659/5971/3575/6868/9092/3707/8651/1236/64332/7048/23240/6722/677/2648/51043/4860/23598/10892/6654/114836/54542/2475/6095/3146/7040	30
GOTERM_BP	GO:0002285	lymphocyte activation involved in immune response	24/1221	174/18493	0.000481679	0.0227753	2207/6778/5788/602/6845/5971/64332/2185/165918/80762/51043/5336/10892/114836/54542/4853/2475/6095/164/7158/202309/23529/3146/7040	24
GOTERM_BP	GO:0046632	alpha-beta T cell differentiation	16/1221	101/18493	0.000920095	0.033048	6778/602/3659/5971/3707/8651/64332/7048/51043/4860/10892/114836/54542/2475/6095/3146	16
GOTERM_BP	GO:0002292	T cell differentiation involved in immune response	12/1221	66/18493	0.00115265	0.0364416	2207/6778/602/5971/64332/51043/10892/114836/54542/2475/6095/3146	12
GOTERM_BP	GO:0002294	CD4-positive, alpha-beta T cell differentiation involved in immune response	11/1221	59/18493	0.00147816	0.0422341	6778/602/5971/64332/51043/10892/114836/54542/2475/6095/3146	11
GOTERM_BP	GO:0035710	CD4-positive, alpha-beta T cell activation	14/1221	87/18493	0.00160933	0.044323	6778/602/1604/5971/8651/64332/7048/51043/10892/114836/54542/2475/6095/3146	14
GOTERM_BP	GO:0002287	alpha-beta T cell activation involved in immune response	11/1221	60/18493	0.00170398	0.0452953	6778/602/5971/64332/51043/10892/114836/54542/2475/6095/3146	11
GOTERM_BP	GO:0002293	alpha-beta T cell differentiation involved in immune response	11/1221	60/18493	0.00170398	0.0452953	6778/602/5971/64332/51043/10892/114836/54542/2475/6095/3146	11
GOTERM_BP	GO:0001776	leukocyte homeostasis	14/1221	88/18493	0.00179999	0.0473761	972/2207/6868/3707/578/5027/6654/5366/207/54542/8314/202309/3146/7040	14
GOTERM_BP	GO:0002819	regulation of adaptive immune response	23/1221	157/18493	0.000260681	0.0163861	3107/2207/6778/5788/3659/3575/113/3570/64332/962/80762/51043/10892/5027/23411/8417/54542/3106/3572/7158/23529/3146/7040	23
GOTERM_BP	GO:0002698	negative regulation of immune effector process	18/1221	111/18493	0.000338631	0.0187952	5788/11314/1604/3575/933/5272/3162/10475/79004/5495/80762/51043/613/54542/11213/1398/708/7040	18
GOTERM_BP	GO:0010935	regulation of macrophage cytokine production	5/1221	12/18493	0.000665951	0.0270703	972/10417/79004/11213/7040	5
GOTERM_BP	GO:0050777	negative regulation of immune response	19/1221	131/18493	0.000976193	0.0338036	6778/5788/5692/3428/11314/1604/3575/5272/3162/171389/58509/79004/80762/51043/613/54542/11213/1398/7040	19
GOTERM_BP	GO:0045088	regulation of innate immune response	40/1221	365/18493	0.00113605	0.0362159	3148/2207/5567/3659/3428/6352/11314/9782/5971/7311/57162/26065/5272/9021/8651/171389/4841/58509/3455/5336/10892/5062/115362/6421/114836/9698/2867/5608/10432/11213/1398/708/90268/9258/9252/164/257397/6059/3146/2219	40
GOTERM_BP	GO:0010506	regulation of autophagy	45/1221	303/18493	2.63847e-07	0.000100695	3428/55294/1982/823/51520/3162/171389/1611/51322/55737/10193/472/51606/6737/51382/5049/533/2081/201475/4943/23411/84148/58476/3064/207/9559/100287171/10645/23274/57154/2475/2773/54832/6720/79443/2931/8992/7942/7249/128866/257397/56893/3146/140710/53373	45
GOTERM_BP	GO:0019216	regulation of lipid metabolic process	53/1221	388/18493	3.68826e-07	0.000131376	10499/7132/8525/55294/85441/8721/7536/6667/10577/3422/51422/6610/9021/8651/1236/9612/2185/116986/1609/5294/2194/96764/84649/8841/124997/208/23411/51099/64805/79602/79888/207/100287171/476/114294/150094/6604/55512/8776/2475/85329/5140/6095/6720/51/31/26137/5901/5447/6907/8720/55066/7040	53
GOTERM_BP	GO:0009895	negative regulation of catabolic process	40/1221	287/18493	5.97313e-06	0.00122748	2316/26986/1982/51520/6599/8531/3162/6872/1611/4088/51322/7077/8241/116986/55737/5294/10492/9683/9759/10193/3183/9827/207/80011/100287171/11213/23274/7874/10956/2475/5140/64844/2931/10128/9860/7249/128866/257397/56893/8604	40
GOTERM_BP	GO:0006109	regulation of carbohydrate metabolic process	27/1221	162/18493	7.53706e-06	0.00143823	10499/51422/2185/1609/84649/9759/5571/2648/208/5027/23411/5366/207/8445/22877/150094/2475/6095/2931/90673/26137/89801/3146/140710/8604/57486/7040	27
GOTERM_BP	GO:0031330	negative regulation of cellular catabolic process	35/1221	245/18493	1.30615e-05	0.00218087	26986/1982/51520/6599/8531/3162/6872/1611/51322/7077/8241/55737/5294/10492/9683/9759/10193/3183/9827/207/80011/100287171/23274/7874/10956/2475/64844/2931/10128/9860/7249/128866/257397/56893/8604	35
GOTERM_BP	GO:0016241	regulation of macroautophagy	26/1221	158/18493	1.39499e-05	0.00224125	823/3162/51322/55737/10193/51606/51382/5049/533/2081/201475/4943/23411/3064/207/9559/23274/57154/2475/2773/54832/79443/8992/7249/128866/56893	26
GOTERM_BP	GO:0009896	positive regulation of catabolic process	50/1221	407/18493	1.6297e-05	0.00240967	26986/55294/10221/1452/3162/6872/51160/5976/51322/2185/55737/51343/677/122809/10193/11060/472/80762/6737/55743/10236/5049/208/5027/201475/23411/9698/51099/58476/79888/3064/207/55147/10645/23274/57154/4193/2773/54832/25820/79443/2931/7942/26137/7249/25897/3146/9781/53373/23112	50
GOTERM_BP	GO:0043244	regulation of protein complex disassembly	20/1221	106/18493	1.76016e-05	0.00247487	57551/9948/832/6711/5976/253725/4943/23064/11344/2107/11213/23274/11078/6710/79443/10300/23122/146057/56893/55604	20
GOTERM_BP	GO:0031331	positive regulation of cellular catabolic process	44/1221	347/18493	2.38964e-05	0.0032738	26986/55294/10221/1452/3162/6872/5976/51322/2185/55737/677/122809/472/6737/55743/10236/5049/208/5027/201475/23411/9698/51099/58476/3064/207/55147/10645/23274/57154/4193/2773/54832/25820/79443/2931/7942/26137/7249/25897/3146/9781/53373/23112	44
GOTERM_BP	GO:0034248	regulation of cellular amide metabolic process	52/1221	453/18493	6.96952e-05	0.00678572	6188/468/26986/7132/602/7458/1982/6352/10289/26065/5935/6610/8531/23645/25946/5976/2185/9513/10492/677/56478/54915/192670/10236/208/10347/9698/2107/274/207/55147/5187/1979/55512/57409/51123/708/2475/8672/60678/80315/2931/10128/16/4691/317649/8550/23185/84881/23112/55571/55066	52
GOTERM_BP	GO:0043087	regulation of GTPase activity	54/1221	481/18493	9.19895e-05	0.00833051	6001/3688/9138/6281/9938/10154/6352/9744/10636/10435/6305/51520/79090/64744/5902/1236/2185/9605/116986/28964/23526/79658/8853/192111/23232/208/6654/9826/4943/23129/613/23527/9827/57186/10484/79874/6102/1398/1122/23380/2475/253260/396/10144/57148/163486/7249/201176/9693/8831/9882/23076/57706/6362	54
GOTERM_BP	GO:0010906	regulation of glucose metabolic process	19/1221	111/18493	0.000112793	0.00975324	10499/1609/84649/2648/208/23411/5366/207/8445/150094/2475/6095/2931/90673/89801/3146/140710/8604/57486	19
GOTERM_BP	GO:1903320	regulation of protein modification by small protein conjugation or removal	30/1221	221/18493	0.000135766	0.0109908	6188/55294/57162/7375/339745/6872/51160/9112/10210/64689/51343/9683/1025/9759/80762/10116/6737/55743/10892/57561/51588/7321/207/100287171/59343/2475/64844/54778/91947/2931	30
GOTERM_BP	GO:0033044	regulation of chromosome organization	40/1221	330/18493	0.000148192	0.0116439	23558/8379/26054/23476/5885/51112/63925/5927/5976/8658/122953/55209/1025/472/2648/26277/51043/3183/80351/6421/84464/90780/23411/80349/9869/5253/54454/9184/908/7874/11143/29117/817/6720/9252/80169/23741/54904/8550/7040	40
GOTERM_BP	GO:0010675	regulation of cellular carbohydrate metabolic process	21/1221	134/18493	0.000184704	0.0137066	10499/2185/1609/84649/9759/2648/208/23411/5366/207/8445/150094/2475/6095/2931/90673/89801/3146/140710/8604/57486	21
GOTERM_BP	GO:0031396	regulation of protein ubiquitination	27/1221	195/18493	0.000207188	0.0140169	6188/55294/57162/7375/339745/6872/51160/9112/10210/64689/51343/9683/1025/80762/10116/55743/10892/57561/7321/207/100287171/59343/2475/64844/54778/91947/2931	27
GOTERM_BP	GO:1903146	regulation of autophagy of mitochondrion	10/1221	40/18493	0.000207249	0.0140169	55294/10193/3064/10645/23274/57154/54832/6720/2931/7249	10
GOTERM_BP	GO:0043547	positive regulation of GTPase activity	46/1221	405/18493	0.000227855	0.0146678	6001/3688/9138/6281/9938/6352/9744/10636/10435/51520/64744/5902/1236/2185/9605/116986/28964/23526/79658/8853/192111/23232/208/6654/9826/4943/613/23527/9827/57186/10484/79874/6102/1122/23380/396/10144/57148/163486/7249/201176/9693/8831/9882/57706/6362	46
GOTERM_BP	GO:0001933	negative regulation of protein phosphorylation	46/1221	408/18493	0.000269299	0.0164745	23770/10048/5788/11314/10636/10221/808/3476/9467/11171/51422/9021/8651/578/171389/2950/1609/9535/91663/58509/84335/23636/5515/122809/8841/27250/4298/5062/5027/11142/9113/23411/207/1399/5187/11213/9770/2475/5795/57732/7249/5518/25937/54431/22876/7040	46
GOTERM_BP	GO:0010508	positive regulation of autophagy	18/1221	110/18493	0.000302008	0.0175395	3162/51322/6737/5049/201475/23411/58476/3064/10645/23274/57154/2773/54832/79443/7942/7249/3146/53373	18
GOTERM_BP	GO:0031056	regulation of histone modification	21/1221	139/18493	0.00030988	0.0178031	23558/23476/63925/5927/122953/55209/1025/472/2648/51043/90780/23411/80349/11143/29117/817/6720/9252/23741/54904/7040	21
GOTERM_BP	GO:1900026	positive regulation of substrate adhesion-dependent cell spreading	9/1221	35/18493	0.00034122	0.0187952	2316/6281/80005/91663/1399/1398/708/11078/55604	9
GOTERM_BP	GO:1905269	positive regulation of chromatin organization	16/1221	94/18493	0.000407531	0.0205112	23558/23476/122953/1025/472/2648/51043/23411/80349/9869/11143/29117/6720/9252/54904/7040	16
GOTERM_BP	GO:0046890	regulation of lipid biosynthetic process	25/1221	183/18493	0.000430008	0.0207883	7132/55294/7536/6667/3422/51422/6610/116986/1609/2194/84649/23411/79602/79888/207/476/150094/55512/2475/6720/31/26137/5901/5447/8720	25
GOTERM_BP	GO:1902275	regulation of chromatin organization	24/1221	175/18493	0.000524086	0.0235667	23558/23476/63925/5927/122953/55209/1025/472/2648/51043/90780/23411/80349/9869/5253/54454/11143/29117/817/6720/9252/23741/54904/7040	24
GOTERM_BP	GO:0031058	positive regulation of histone modification	15/1221	87/18493	0.000530843	0.0235667	23558/23476/122953/1025/472/2648/51043/23411/80349/11143/29117/6720/9252/54904/7040	15
GOTERM_BP	GO:2001252	positive regulation of chromosome organization	23/1221	165/18493	0.000538113	0.0235667	23558/23476/5885/8658/122953/1025/472/2648/51043/80351/6421/84464/23411/80349/9869/908/11143/29117/6720/9252/54904/8550/7040	23
GOTERM_BP	GO:0051052	regulation of DNA metabolic process	45/1221	412/18493	0.000620246	0.0263014	6188/51720/6778/5788/55294/6118/3575/5976/10189/2185/56897/8658/1025/5515/165918/472/26277/80762/3183/80351/84464/1054/23411/9869/9400/92797/207/51149/23244/908/59343/23514/7874/151987/8243/2140/146059/80169/5518/58525/7158/23529/3146/8550/7040	45
GOTERM_BP	GO:1903322	positive regulation of protein modification by small protein conjugation or removal	19/1221	127/18493	0.000664339	0.0270703	55294/57162/9112/10210/64689/51343/1025/9759/80762/55743/10892/57561/51588/7321/59343/64844/54778/91947/2931	19
GOTERM_BP	GO:2000058	regulation of ubiquitin-dependent protein catabolic process	21/1221	147/18493	0.000664967	0.0270703	55294/10221/6599/1452/6872/51322/2185/9683/122809/55743/9113/207/23274/7874/57154/4193/25820/2931/25897/56893/9781	21
GOTERM_BP	GO:0016242	negative regulation of macroautophagy	8/1221	31/18493	0.000708527	0.0282512	3162/10193/207/23274/2475/7249/128866/56893	8
GOTERM_BP	GO:0031398	positive regulation of protein ubiquitination	17/1221	109/18493	0.000774751	0.0302153	55294/57162/9112/10210/64689/51343/1025/80762/55743/10892/57561/7321/59343/64844/54778/91947/2931	17
GOTERM_BP	GO:0120034	positive regulation of plasma membrane bounded cell projection assembly	16/1221	100/18493	0.000823809	0.0312171	10435/1236/10801/6722/9696/9759/23433/10602/9842/5027/11344/64805/3064/100287171/2475/153241	16
GOTERM_BP	GO:0016239	positive regulation of macroautophagy	12/1221	64/18493	0.000868484	0.0326782	3162/51322/5049/201475/23411/3064/23274/57154/2773/54832/79443/7249	12
GOTERM_BP	GO:0043255	regulation of carbohydrate biosynthetic process	15/1221	92/18493	0.000970262	0.0338036	2185/1609/84649/2648/208/207/8445/150094/2475/2931/90673/89801/140710/57486/7040	15
GOTERM_BP	GO:0032881	regulation of polysaccharide metabolic process	9/1221	40/18493	0.000980687	0.0338036	208/207/8445/2475/2931/90673/89801/3146/7040	9
GOTERM_BP	GO:0042058	regulation of epidermal growth factor receptor signaling pathway	14/1221	83/18493	0.00100595	0.0338036	653361/55294/79651/6868/2060/58513/93343/23636/122809/6654/207/5795/8027/57732	14
GOTERM_BP	GO:0070873	regulation of glycogen metabolic process	8/1221	33/18493	0.00110842	0.0361115	208/207/8445/2475/2931/90673/89801/3146	8
GOTERM_BP	GO:0050732	negative regulation of peptidyl-tyrosine phosphorylation	10/1221	49/18493	0.00116886	0.0365217	5788/11314/9467/9021/8651/5515/122809/57732/5518/22876	10
GOTERM_BP	GO:0031349	positive regulation of defense response	45/1221	427/18493	0.00129822	0.0396365	3148/7132/2207/5567/3659/3428/6352/11314/6845/9782/5971/7311/57162/26065/5008/171389/4841/1236/64332/923/5294/58509/3735/27250/5336/10892/5062/115362/6421/114836/9698/2867/5608/10432/11213/708/90268/9258/9252/3572/164/257397/3146/6362/2219	45
GOTERM_BP	GO:1900024	regulation of substrate adhesion-dependent cell spreading	10/1221	50/18493	0.00137602	0.0406192	2316/6281/80005/91663/253725/1399/1398/708/11078/55604	10
GOTERM_BP	GO:1904893	negative regulation of STAT cascade	6/1221	20/18493	0.00141926	0.0413673	602/9021/8651/5515/5518/22876	6
GOTERM_BP	GO:0050792	regulation of viral process	23/1221	177/18493	0.00142459	0.0413673	972/10410/26986/3428/6352/24138/6667/200315/60489/10475/5034/93343/1025/6737/9150/1655/63901/6733/29969/128866/23076/55223/2219	23
GOTERM_BP	GO:0048524	positive regulation of viral process	14/1221	86/18493	0.00143578	0.041467	972/26986/6352/6667/10475/5034/93343/1025/6737/9150/6733/29969/128866/23076	14
GOTERM_BP	GO:0006469	negative regulation of protein kinase activity	27/1221	222/18493	0.00157841	0.0436967	5788/11314/10636/10221/9467/51422/9021/8651/2950/9535/84335/23636/5515/122809/27250/4298/5062/11142/9113/23411/207/11213/5795/57732/7249/5518/25937	27
GOTERM_BP	GO:0032885	regulation of polysaccharide biosynthetic process	8/1221	35/18493	0.00167051	0.0452953	208/207/8445/2475/2931/90673/89801/7040	8
GOTERM_BP	GO:0010907	positive regulation of glucose metabolic process	9/1221	43/18493	0.00169215	0.0452953	84649/2648/208/5366/207/8445/90673/3146/8604	9
GOTERM_BP	GO:0030833	regulation of actin filament polymerization	21/1221	158/18493	0.00169448	0.0452953	10095/832/10435/6711/1236/2185/9535/91663/253725/10602/9113/11344/274/100287171/123720/2475/11078/253260/6710/55604/348110	21
GOTERM_BP	GO:0045785	positive regulation of cell adhesion	42/1221	397/18493	0.00171845	0.0454538	6188/972/2316/7402/5788/6281/8861/6352/3676/1604/3575/9092/3707/8651/3570/1236/64332/4088/7048/2185/923/80005/91663/472/51043/4860/10892/5062/9402/64805/207/1399/1398/708/11078/5795/3572/4811/3146/55604/7040/22915	42
GOTERM_BP	GO:0005979	regulation of glycogen biosynthetic process	7/1221	28/18493	0.00186252	0.048522	208/207/8445/2475/2931/90673/89801	7
GOTERM_BP	GO:0010962	regulation of glucan biosynthetic process	7/1221	28/18493	0.00186252	0.048522	208/207/8445/2475/2931/90673/89801	7
GOTERM_BP	GO:0042176	regulation of protein catabolic process	40/1221	375/18493	0.00187985	0.048522	2316/55294/10221/6599/1452/6872/51160/4088/51322/2185/7077/116986/55737/51343/9683/122809/10193/11060/80762/55743/9113/9827/79888/207/80011/5709/10213/11213/23274/7874/57154/10956/4193/64844/25820/2931/9860/25897/56893/9781	40
GOTERM_BP	GO:0031334	positive regulation of protein complex assembly	30/1221	259/18493	0.00194109	0.0496231	6188/10095/6118/10435/6872/1236/2185/6722/9535/2242/472/253725/10602/115362/23064/5366/64805/274/23379/100287171/123720/23514/125170/2475/96459/253260/10142/55604/348110/7040	30
GOTERM_BP	GO:0032147	activation of protein kinase activity	38/1221	323/18493	0.000390125	0.0201453	972/57551/5567/5788/4217/6352/11314/7311/51422/8651/3570/55437/10961/7048/2185/1609/6789/9043/3735/51765/10892/5062/5027/2081/23162/9748/207/1399/5608/1398/2475/253260/29969/8795/257397/57498/3146/8550	38
GOTERM_BP	GO:0007041	lysosomal transport	16/1221	101/18493	0.000920095	0.033048	22898/6845/51520/55737/2580/201475/6272/274/9648/81609/79158/23274/64145/164/54664/51542	16
GOTERM_BP	GO:0032869	cellular response to insulin stimulus	31/1221	204/18493	1.16084e-05	0.00200076	896/10890/4303/6667/6599/9021/8651/2950/677/23433/51606/51043/51382/208/57727/533/6654/23411/207/9847/1979/26060/4644/5140/6720/2931/8992/7249/6715/9882/140710	31
GOTERM_BP	GO:0071375	cellular response to peptide hormone stimulus	39/1221	307/18493	6.52517e-05	0.00657811	896/4149/5567/10890/4303/6667/6599/9021/8651/113/2950/677/23433/51606/51043/51382/208/57727/533/6654/23411/207/9847/1979/26060/1398/4644/4193/5140/6720/2931/8992/4929/7249/5447/6715/9882/140710/7040	39
GOTERM_BP	GO:0071496	cellular response to external stimulus	38/1221	328/18493	0.000526573	0.0235667	468/81788/4149/7132/1265/5788/4217/3659/3428/51520/3162/6872/578/1611/2950/6722/8658/9759/51765/5027/10514/23411/5366/64805/207/476/150094/5287/23274/2475/4193/96459/80315/6720/4929/8795/6715/7040	38
GOTERM_BP	GO:2001020	regulation of response to DNA damage stimulus	30/1221	206/18493	3.66317e-05	0.00399435	6188/3190/972/51720/598/6118/1032/25946/56897/1025/165918/472/10116/51588/1054/23411/138151/9400/1655/5366/92797/51149/23514/151987/4193/2140/64844/79621/7158/3146	30
GOTERM_BP	GO:2001022	positive regulation of response to DNA damage stimulus	15/1221	92/18493	0.000970262	0.0338036	6188/51720/25946/165918/472/51588/1054/23411/138151/1655/5366/51149/23514/2140/3146	15
GOTERM_BP	GO:0006403	RNA localization	34/1221	231/18493	9.05546e-06	0.00161278	2091/29107/25946/54890/5976/10189/9972/7048/23144/10482/8658/23636/677/472/24148/9804/6421/29894/26019/636/348995/908/100101267/59343/57122/64062/10128/54439/53981/51362/5901/9887/54680/6059	34
GOTERM_BP	GO:0034067	protein localization to Golgi apparatus	9/1221	27/18493	3.65883e-05	0.00399435	5870/55187/2580/83452/115362/10139/9648/64083/54832	9
GOTERM_BP	GO:0051236	establishment of RNA localization	28/1221	198/18493	0.000110593	0.00975324	29107/54890/5976/10189/9972/7048/23144/10482/8658/23636/677/472/9804/6421/29894/26019/348995/100101267/59343/57122/64062/10128/54439/53981/51362/5901/9887/6059	28
GOTERM_BP	GO:0072659	protein localization to plasma membrane	31/1221	244/18493	0.000351105	0.0190115	3688/2316/7132/2207/10890/6281/598/6845/6711/55737/91663/23433/2580/8500/208/23241/10139/8417/207/9847/23759/64083/26060/122416/57154/4644/22841/23122/9693/81619/7040	31
GOTERM_BP	GO:0034504	protein localization to nucleus	32/1221	269/18493	0.000898829	0.033048	2316/602/29107/4088/9972/10210/23636/8841/10628/473/10347/11142/23411/23607/30000/23345/207/908/100101267/11143/57122/4193/9258/29969/23633/7249/5901/6500/25885/9913/8720/7040	32
GOTERM_BP	GO:0097193	intrinsic apoptotic signaling pathway	41/1221	287/18493	2.44918e-06	0.000568956	6188/468/3190/972/7132/602/4217/3428/55294/598/8531/1032/3162/578/4841/23645/25946/10961/5034/10210/472/2081/6421/51588/10514/23411/138151/1655/5366/207/8445/85329/4193/64844/81537/51060/8795/8065/54700/54431/6477	41
GOTERM_BP	GO:0008630	intrinsic apoptotic signaling pathway in response to DNA damage	18/1221	102/18493	0.000113176	0.00975324	6188/3190/972/7132/602/3428/598/1032/3162/578/25946/10210/472/51588/23411/138151/8445/64844	18
GOTERM_BP	GO:0097191	extrinsic apoptotic signaling pathway	29/1221	224/18493	0.000392123	0.0201453	3148/7132/5788/162989/10616/598/3570/3162/578/55437/4088/2950/6789/10193/10116/5062/5027/6272/5366/3064/207/26060/2140/2931/81537/2730/8795/5518/7040	29
GOTERM_BP	GO:0072332	intrinsic apoptotic signaling pathway by p53 class mediator	14/1221	76/18493	0.000402148	0.0204636	3190/972/602/3428/25946/10210/10514/23411/1655/5366/8445/4193/64844/54700	14
GOTERM_BP	GO:0070059	intrinsic apoptotic signaling pathway in response to endoplasmic reticulum stress	11/1221	59/18493	0.00147816	0.0422341	468/4217/578/23645/10961/2081/23411/5366/51060/8795/54431	11
GOTERM_BP	GO:0042771	intrinsic apoptotic signaling pathway in response to DNA damage by p53 class mediator	9/1221	43/18493	0.00169215	0.0452953	3190/972/602/3428/25946/10210/23411/8445/64844	9
GOTERM_BP	GO:1902229	regulation of intrinsic apoptotic signaling pathway in response to DNA damage	10/1221	39/18493	0.000165114	0.012603	6188/3190/972/598/1032/25946/51588/23411/138151/64844	10
GOTERM_BP	GO:2001233	regulation of apoptotic signaling pathway	45/1221	391/18493	0.000197209	0.0140169	6188/3190/972/3148/5788/55294/162989/10616/598/8531/1032/3162/578/4841/55437/25946/10971/10961/4088/5034/2950/6789/10116/5062/1524/84289/6421/51588/23411/138151/5366/3064/207/4193/2140/2773/64844/2931/51060/2730/4929/8795/5518/54700/6477	45
GOTERM_BP	GO:2001242	regulation of intrinsic apoptotic signaling pathway	22/1221	161/18493	0.000921609	0.033048	6188/3190/972/55294/598/8531/1032/4841/25946/10961/5034/6421/51588/23411/138151/5366/207/4193/64844/51060/54700/6477	22
GOTERM_BP	GO:0010498	proteasomal protein catabolic process	66/1221	452/18493	8.98219e-10	4.26362e-06	5698/5692/55294/10616/10221/144699/7311/57162/7323/54620/6599/339745/1452/6872/23304/9112/10475/51322/10210/997/51343/9683/122809/5688/10193/57003/11060/7844/25852/55743/92305/23411/23607/7321/6400/5366/207/80011/267/8924/10213/9184/5713/23274/7874/57154/10956/4193/54788/64844/25820/2931/54557/64839/56886/81858/6500/55757/25937/9354/25897/6907/54431/56893/9781/6477	66
GOTERM_BP	GO:0043161	proteasome-mediated ubiquitin-dependent protein catabolic process	59/1221	389/18493	1.65831e-09	4.26362e-06	5698/5692/55294/10616/10221/144699/7311/57162/7323/54620/6599/339745/1452/6872/23304/9112/10475/51322/10210/997/51343/9683/122809/5688/57003/11060/7844/25852/55743/92305/23411/23607/7321/6400/207/267/8924/10213/9184/5713/23274/7874/57154/10956/4193/25820/2931/54557/64839/81858/6500/25937/9354/25897/6907/54431/56893/9781/6477	59
GOTERM_BP	GO:0044262	cellular carbohydrate metabolic process	40/1221	278/18493	2.70309e-06	0.000601776	10499/5226/3101/51422/55454/2185/1609/2683/84649/9759/2648/2548/208/3632/23411/5366/207/8445/79158/5257/2820/150094/2475/26509/2632/6095/2931/54928/3572/90673/5236/89801/5501/2131/3146/140710/8604/55790/57486/2595	40
GOTERM_BP	GO:0005976	polysaccharide metabolic process	20/1221	109/18493	2.69277e-05	0.00359687	51422/55454/56548/2548/208/207/8445/5257/2475/2632/2931/3572/90673/5236/89801/5501/2131/3146/55790/7040	20
GOTERM_BP	GO:0005977	glycogen metabolic process	15/1221	73/18493	6.98512e-05	0.00678572	51422/2548/208/207/8445/5257/2475/2632/2931/3572/90673/5236/89801/5501/3146	15
GOTERM_BP	GO:0044264	cellular polysaccharide metabolic process	18/1221	99/18493	7.57944e-05	0.0072316	51422/55454/2548/208/207/8445/5257/2475/2632/2931/3572/90673/5236/89801/5501/2131/3146/55790	18
GOTERM_BP	GO:0006073	cellular glucan metabolic process	15/1221	74/18493	8.23319e-05	0.00758447	51422/2548/208/207/8445/5257/2475/2632/2931/3572/90673/5236/89801/5501/3146	15
GOTERM_BP	GO:0044042	glucan metabolic process	15/1221	74/18493	8.23319e-05	0.00758447	51422/2548/208/207/8445/5257/2475/2632/2931/3572/90673/5236/89801/5501/3146	15
GOTERM_BP	GO:0006006	glucose metabolic process	27/1221	204/18493	0.000431873	0.0207883	10499/468/226/3101/1609/84649/2648/2548/208/23411/5366/207/283450/8445/2820/150094/2475/6095/2931/1737/90673/5236/89801/3146/140710/8604/57486	27
GOTERM_BP	GO:0006112	energy reserve metabolic process	15/1221	87/18493	0.000530843	0.0235667	51422/2548/208/207/8445/5257/2475/2632/2931/3572/90673/5236/89801/5501/3146	15
GOTERM_BP	GO:0006401	RNA catabolic process	39/1221	340/18493	0.000544998	0.0236742	6188/26986/162989/85441/7311/11157/8531/5976/8241/9513/84153/10492/677/5515/192670/472/3183/10236/2081/23589/80349/9698/26019/1655/2107/207/55147/26135/2475/342618/10128/6218/79621/6232/9887/5518/23112/55571/55181	39
GOTERM_BP	GO:0019318	hexose metabolic process	30/1221	244/18493	0.000750497	0.0294846	10499/468/226/3101/2530/4124/1609/2683/84649/2648/2548/208/23411/5366/207/283450/8445/2820/150094/2475/6095/2931/1737/90673/5236/89801/3146/140710/8604/57486	30
GOTERM_BP	GO:0006402	mRNA catabolic process	35/1221	307/18493	0.00113874	0.0362159	6188/26986/85441/7311/11157/8531/5976/8241/9513/10492/677/5515/192670/472/3183/10236/2081/23589/80349/9698/26019/1655/2107/207/55147/26135/2475/342618/6218/6232/9887/5518/23112/55571/55181	35
GOTERM_BP	GO:0007173	epidermal growth factor receptor signaling pathway	19/1221	120/18493	0.000321219	0.0182582	653361/55294/79651/6868/2060/2185/58513/93343/23636/122809/6654/5335/207/9770/5795/8027/9252/57732/7040	19
GOTERM_BP	GO:0038127	ERBB signaling pathway	21/1221	143/18493	0.000458242	0.0218606	653361/55294/79651/6868/2060/2185/58513/93343/23636/122809/8895/6654/5335/207/9770/5795/8027/9252/57732/8065/7040	21
GOTERM_BP	GO:0032006	regulation of TOR signaling	16/1221	100/18493	0.000823809	0.0312171	51520/23304/1609/84335/8841/472/55654/23411/64083/150094/23274/96459/253260/2931/7249/8550	16
GOTERM_BP	GO:0032007	negative regulation of TOR signaling	10/1221	50/18493	0.00137602	0.0406192	23304/84335/472/55654/23411/150094/96459/2931/7249/8550	10
GOTERM_BP	GO:0031929	TOR signaling	19/1221	118/18493	0.000257516	0.0163799	51520/23304/1609/84335/8841/472/55654/23411/207/64083/1979/150094/23274/2475/96459/253260/2931/7249/8550	19
GOTERM_BP	GO:1901796	regulation of signal transduction by p53 class mediator	19/1221	130/18493	0.000888377	0.0330463	3190/972/6881/6872/25946/8148/472/84289/23411/1655/5366/207/8445/29117/4193/64844/6873/54700/8550	19
GOTERM_BP	GO:0043516	regulation of DNA damage response, signal transduction by p53 class mediator	8/1221	32/18493	0.000890635	0.0330463	972/25946/472/23411/1655/5366/4193/64844	8
GOTERM_BP	GO:0043122	regulation of I-kappaB kinase/NF-kappaB signaling	33/1221	226/18493	1.44431e-05	0.00224125	972/2316/7132/6398/10616/24138/10342/57162/1936/23476/3162/171389/51523/1236/10475/2950/23636/5494/5495/80762/10892/1524/23411/207/124583/5187/23005/6095/843/347734/81858/8795/55223	33
GOTERM_BP	GO:0043123	positive regulation of I-kappaB kinase/NF-kappaB signaling	26/1221	181/18493	0.000148127	0.0116439	972/2316/7132/6398/10616/24138/10342/57162/1936/23476/3162/51523/1236/10475/23636/5494/80762/10892/1524/207/124583/843/347734/81858/8795/55223	26
GOTERM_BP	GO:0007249	I-kappaB kinase/NF-kappaB signaling	37/1221	258/18493	6.8317e-06	0.00135192	972/2316/7132/6398/602/10616/24138/5971/7311/10342/57162/1936/23476/3162/171389/51523/1236/10475/2950/23636/5494/5495/80762/10892/1524/23411/207/124583/5187/23005/6095/843/347734/81858/8795/257397/55223	37
GOTERM_BP	GO:0046426	negative regulation of JAK-STAT cascade	6/1221	19/18493	0.00105174	0.0349035	602/9021/8651/5515/5518/22876	6
GOTERM_BP	GO:0006914	autophagy	66/1221	466/18493	3.19193e-09	4.26362e-06	3428/55294/1982/823/51520/51422/81671/3162/23130/171389/51160/128077/1611/51322/55737/93343/5571/10193/472/51606/6737/55014/51382/124997/192111/83452/5049/9842/533/2081/201475/4943/23411/84148/23241/58476/3064/207/10484/9559/100287171/10645/5287/23274/57154/2475/2773/54832/6720/79443/2931/137492/8992/8027/9895/7942/7249/55102/128866/257397/56893/3146/140710/55669/53373/83636	66
GOTERM_BP	GO:0061919	process utilizing autophagic mechanism	66/1221	466/18493	3.19193e-09	4.26362e-06	3428/55294/1982/823/51520/51422/81671/3162/23130/171389/51160/128077/1611/51322/55737/93343/5571/10193/472/51606/6737/55014/51382/124997/192111/83452/5049/9842/533/2081/201475/4943/23411/84148/23241/58476/3064/207/10484/9559/100287171/10645/5287/23274/57154/2475/2773/54832/6720/79443/2931/137492/8992/8027/9895/7942/7249/55102/128866/257397/56893/3146/140710/55669/53373/83636	66
GOTERM_BP	GO:0016570	histone modification	63/1221	456/18493	1.9101e-08	1.68712e-05	23558/51720/2091/23135/8861/6881/51564/22992/339287/9219/23476/63925/5927/6872/23304/9112/51322/122953/55209/1025/9759/8841/165918/472/2648/51043/2145/79813/84289/55167/6421/90780/2005/23411/80349/9869/84148/138151/5253/83852/10432/23186/5187/64426/7874/11143/29117/817/2140/9329/6720/9252/57634/10765/8314/23741/6500/6907/54904/9913/54531/11108/7040	63
GOTERM_BP	GO:0016236	macroautophagy	45/1221	279/18493	2.21033e-08	1.68712e-05	823/51422/81671/3162/23130/51160/128077/51322/55737/93343/5571/10193/51606/55014/51382/124997/192111/83452/5049/533/2081/201475/4943/23411/23241/58476/3064/207/10484/9559/5287/23274/57154/2475/2773/54832/79443/137492/8992/8027/7249/55102/128866/56893/55669	45
GOTERM_BP	GO:0016569	covalent chromatin modification	64/1221	470/18493	2.57737e-08	1.72136e-05	23558/51720/2091/23135/8861/6881/51564/22992/339287/9219/23476/63925/5927/6872/23304/9112/51322/122953/55209/1025/9759/8841/165918/472/2648/51043/2145/79813/84289/55167/6421/1788/90780/2005/23411/80349/9869/84148/138151/5253/83852/10432/23186/5187/64426/7874/11143/29117/817/2140/9329/6720/9252/57634/10765/8314/23741/6500/6907/54904/9913/54531/11108/7040	64
GOTERM_BP	GO:0000209	protein polyubiquitination	42/1221	257/18493	4.42083e-08	2.09148e-05	55294/10616/144699/7311/57162/7323/54620/6872/4012/223082/23304/10475/10210/997/8658/51343/92912/10193/165918/11060/6737/55743/80351/92305/7321/150726/25831/54542/23759/267/91694/63893/57154/64844/25820/54778/81858/6500/9354/25897/9781/6477	42
GOTERM_BP	GO:0016575	histone deacetylation	21/1221	86/18493	1.26575e-07	5.20222e-05	51564/9219/5927/9112/122953/9759/8841/51043/6421/2005/23411/138151/10432/23186/5187/64426/817/6720/6907/54531/7040	21
GOTERM_BP	GO:0035601	protein deacylation	23/1221	111/18493	7.77426e-07	0.00025816	51564/9219/5927/9112/122953/9759/8841/51043/84945/11313/6421/2005/23411/138151/10432/23186/5187/64426/817/6720/6907/54531/7040	23
GOTERM_BP	GO:0016197	endosomal transport	34/1221	208/18493	8.29743e-07	0.00025816	10890/5870/7311/9784/5119/2060/51160/8677/11021/55737/93343/9043/80148/253725/22853/9727/10139/6272/9827/9648/81609/9559/100287171/23274/63893/55317/137492/8027/163486/64145/128866/22876/57706/51542	34
GOTERM_BP	GO:0006913	nucleocytoplasmic transport	49/1221	357/18493	8.77313e-07	0.00025816	2316/6628/602/10636/29107/55437/54890/5976/10189/4088/9972/2010/23144/10482/23636/5571/5494/8841/10628/473/10892/11142/23411/6632/29894/30000/26019/207/348995/100101267/55341/57154/57122/4193/64062/6636/29969/6310/54439/53981/23633/7249/51362/5901/9887/6059/5501/8720/7040	49
GOTERM_BP	GO:0098732	macromolecule deacylation	23/1221	112/18493	9.18031e-07	0.00025816	51564/9219/5927/9112/122953/9759/8841/51043/84945/11313/6421/2005/23411/138151/10432/23186/5187/64426/817/6720/6907/54531/7040	23
GOTERM_BP	GO:0051169	nuclear transport	49/1221	360/18493	1.12291e-06	0.000299986	2316/6628/602/10636/29107/55437/54890/5976/10189/4088/9972/2010/23144/10482/23636/5571/5494/8841/10628/473/10892/11142/23411/6632/29894/30000/26019/207/348995/100101267/55341/57154/57122/4193/64062/6636/29969/6310/54439/53981/23633/7249/51362/5901/9887/6059/5501/8720/7040	49
GOTERM_BP	GO:0006476	protein deacetylation	21/1221	101/18493	2.19071e-06	0.000532045	51564/9219/5927/9112/122953/9759/8841/51043/6421/2005/23411/138151/10432/23186/5187/64426/817/6720/6907/54531/7040	21
GOTERM_BP	GO:0048193	Golgi vesicle transport	47/1221	359/18493	5.43052e-06	0.00116061	3796/10890/5870/6892/832/1604/6845/10342/79090/51112/10960/6711/2060/64689/1315/5265/2580/55014/22872/55291/83452/84342/201475/9276/1783/1778/10139/6272/399687/9648/3064/10484/64837/64083/6102/123720/3831/3835/4644/54832/5537/6710/57222/55770/64145/164/51542	47
GOTERM_BP	GO:0008380	RNA splicing	56/1221	463/18493	8.22422e-06	0.00151524	4154/3190/26986/79026/6628/10421/7536/7375/11171/11157/9092/5935/92906/4841/10189/51503/8241/8449/2962/10492/58509/22913/96764/5515/1665/9904/24148/3183/10236/9879/283989/2081/6421/23064/6632/29894/1655/1207/84950/6651/6733/151987/708/55660/6636/23350/53981/9129/9169/51362/55131/57703/5518/23076/54957/10150	56
GOTERM_BP	GO:0007034	vacuolar transport	23/1221	131/18493	1.46816e-05	0.00224125	22898/6845/51520/5119/51160/55737/80762/55187/2580/201475/6272/274/9648/81609/79158/23274/57154/54832/64145/164/128866/54664/51542	23
GOTERM_BP	GO:0008286	insulin receptor signaling pathway	23/1221	132/18493	1.66869e-05	0.00240967	896/4303/6599/9021/8651/23433/51606/51043/51382/208/57727/533/6654/23411/207/9847/1979/26060/6720/2931/8992/7249/140710	23
GOTERM_BP	GO:0060992	response to fungicide	6/1221	11/18493	2.8334e-05	0.00360449	23135/10365/598/79813/10765/6715	6
GOTERM_BP	GO:0051168	nuclear export	29/1221	194/18493	3.00567e-05	0.00369085	29107/55437/54890/5976/10189/9972/2010/23144/10482/23636/5494/10892/29894/26019/348995/100101267/55341/57154/57122/4193/64062/6310/54439/53981/51362/5901/9887/6059/7040	29
GOTERM_BP	GO:0051235	maintenance of location	41/1221	318/18493	3.03944e-05	0.00369085	2495/2316/5788/602/55294/808/1236/2185/10210/187/81573/4232/84649/55187/5336/3954/2548/5027/5335/8694/9113/23411/2867/11344/51099/23345/3064/207/64083/7226/10956/4644/817/54832/10142/3710/6500/9913/53373/7040/4052	41
GOTERM_BP	GO:0032943	mononuclear cell proliferation	36/1221	266/18493	3.25966e-05	0.0038703	6188/973/972/896/5788/8379/3659/6352/11314/1604/3575/57162/933/63925/3570/7048/3614/23240/923/5294/2000/472/80762/51043/4860/10892/5027/6654/54542/64844/3572/202309/23529/3146/931/7040	36
GOTERM_BP	GO:0000377	RNA splicing, via transesterification reactions with bulged adenosine as nucleophile	46/1221	374/18493	3.40819e-05	0.00387446	4154/3190/26986/6628/10421/7536/7375/11171/11157/9092/5935/10189/51503/8241/8449/2962/10492/58509/22913/96764/1665/9904/24148/3183/10236/9879/6421/23064/6632/29894/1655/1207/84950/6651/6733/708/55660/6636/23350/53981/9129/9169/51362/57703/54957/10150	46
GOTERM_BP	GO:0000398	mRNA splicing, via spliceosome	46/1221	374/18493	3.40819e-05	0.00387446	4154/3190/26986/6628/10421/7536/7375/11171/11157/9092/5935/10189/51503/8241/8449/2962/10492/58509/22913/96764/1665/9904/24148/3183/10236/9879/6421/23064/6632/29894/1655/1207/84950/6651/6733/708/55660/6636/23350/53981/9129/9169/51362/57703/54957/10150	46
GOTERM_BP	GO:0000375	RNA splicing, via transesterification reactions	46/1221	377/18493	4.15646e-05	0.00444159	4154/3190/26986/6628/10421/7536/7375/11171/11157/9092/5935/10189/51503/8241/8449/2962/10492/58509/22913/96764/1665/9904/24148/3183/10236/9879/6421/23064/6632/29894/1655/1207/84950/6651/6733/708/55660/6636/23350/53981/9129/9169/51362/57703/54957/10150	46
GOTERM_BP	GO:0032868	response to insulin	35/1221	259/18493	4.30427e-05	0.00450935	896/4149/10890/4303/6667/6599/9021/8651/2950/677/3030/23433/51606/51043/51382/208/57727/533/6654/23411/6272/207/9847/1979/26060/2475/4644/5140/6720/2931/8992/7249/6715/9882/140710	35
GOTERM_BP	GO:0016051	carbohydrate biosynthetic process	29/1221	209/18493	0.000118264	0.00994274	468/226/5226/55454/2530/2185/1609/2683/84649/2648/208/30815/207/8445/2820/150094/2475/2632/2931/54928/90673/5236/89801/2131/140710/8604/55790/57486/7040	29
GOTERM_BP	GO:0032984	protein-containing complex disassembly	39/1221	317/18493	0.000130347	0.0107145	3796/55052/57551/9948/832/6599/1452/5119/6711/128077/5976/4778/6603/63908/2580/55014/253725/51258/4943/23064/116540/11344/2107/54460/9801/11213/6604/23274/3831/11078/6710/79443/10300/23122/146057/6059/56893/124995/55604	39
GOTERM_BP	GO:0010934	macrophage cytokine production	6/1221	14/18493	0.000154972	0.0120002	972/10417/79004/23411/11213/7040	6
GOTERM_BP	GO:0043242	negative regulation of protein complex disassembly	14/1221	71/18493	0.00019176	0.0140169	57551/832/6711/253725/11344/11213/23274/11078/6710/10300/23122/146057/56893/55604	14
GOTERM_BP	GO:0050657	nucleic acid transport	27/1221	195/18493	0.000207188	0.0140169	29107/54890/5976/10189/9972/7048/23144/10482/8658/23636/677/9804/6421/29894/26019/348995/100101267/59343/57122/64062/10128/54439/53981/51362/5901/9887/6059	27
GOTERM_BP	GO:0050658	RNA transport	27/1221	195/18493	0.000207188	0.0140169	29107/54890/5976/10189/9972/7048/23144/10482/8658/23636/677/9804/6421/29894/26019/348995/100101267/59343/57122/64062/10128/54439/53981/51362/5901/9887/6059	27
GOTERM_BP	GO:0022613	ribonucleoprotein complex biogenesis	53/1221	485/18493	0.000210683	0.014071	55052/2091/6628/7458/10421/7536/57050/7375/11171/26065/29777/11157/9092/8994/96764/192670/64434/472/24148/23064/23411/6632/51077/27079/1778/65095/26168/55720/636/1207/6733/51096/708/6636/11103/51386/51018/8665/23195/6218/55623/9129/9169/6232/81875/5901/51388/54680/6059/54700/124995/23076/79707	53
GOTERM_BP	GO:0019882	antigen processing and presentation	25/1221	175/18493	0.000214866	0.0141732	3796/3107/972/2207/10890/5870/6892/832/5971/6890/4012/1236/5867/11021/22872/1783/1778/10484/64837/8905/114876/3831/3835/3106/164	25
GOTERM_BP	GO:0016050	vesicle organization	38/1221	314/18493	0.000221589	0.0144384	6281/6892/8676/6845/6890/10342/79090/5119/2060/51160/25946/8677/64689/93343/80208/5265/55014/22872/55654/55291/208/5027/23607/6272/8417/399687/388552/10484/9847/64083/2773/10015/5537/137492/8027/164/128866/9882	38
GOTERM_BP	GO:0036507	protein demannosylation	7/1221	21/18493	0.000274772	0.0164745	4121/7844/6400/267/10956/56886/55757	7
GOTERM_BP	GO:0036508	protein alpha-1,2-demannosylation	7/1221	21/18493	0.000274772	0.0164745	4121/7844/6400/267/10956/56886/55757	7
GOTERM_BP	GO:0070932	histone H3 deacetylation	7/1221	21/18493	0.000274772	0.0164745	51564/9759/8841/6421/2005/23411/5187	7
GOTERM_BP	GO:0051170	import into nucleus	25/1221	178/18493	0.000280588	0.0164745	2316/6628/602/29107/4088/9972/23636/5571/8841/10628/473/11142/23411/6632/30000/207/100101267/57122/6636/29969/23633/7249/5901/8720/7040	25
GOTERM_BP	GO:0042326	negative regulation of phosphorylation	49/1221	448/18493	0.000352262	0.0190115	23770/10048/5788/11314/10636/10221/808/3476/9467/11171/51422/9021/8651/1032/578/171389/2950/1609/9535/91663/58509/84335/23636/9759/5515/122809/8841/27250/4298/5062/5027/11142/9113/23411/207/1399/100287171/5187/11213/9770/2475/5795/57732/7249/5518/25937/54431/22876/7040	49
GOTERM_BP	GO:0006417	regulation of translation	45/1221	402/18493	0.000365576	0.0195327	6188/468/26986/602/7458/1982/6352/10289/26065/5935/8531/23645/25946/5976/2185/9513/10492/677/56478/54915/192670/10236/208/9698/2107/207/55147/5187/1979/57409/51123/708/2475/8672/60678/80315/10128/16/4691/317649/8550/23185/84881/23112/55571	45
GOTERM_BP	GO:0031648	protein destabilization	10/1221	43/18493	0.000391186	0.0201453	55294/55737/6737/55743/23411/3064/59343/4193/440193/6477	10
GOTERM_BP	GO:0042532	negative regulation of tyrosine phosphorylation of STAT protein	5/1221	11/18493	0.000410761	0.0205112	9021/8651/5515/5518/22876	5
GOTERM_BP	GO:0016311	dephosphorylation	51/1221	475/18493	0.000417525	0.0206559	5788/10421/63935/11314/808/3476/6305/23645/4088/152926/5515/5494/5495/124997/192111/9150/55291/3632/22853/5775/3064/132160/23523/58478/476/8073/162466/3631/8776/151987/2475/2140/64062/5537/9258/5795/81537/54928/5533/90673/26012/55105/8732/9887/5518/5501/22876/23076/26229/55066/7040	51
GOTERM_BP	GO:0030099	myeloid cell differentiation	45/1221	405/18493	0.000429762	0.0207883	972/3148/2207/10365/1441/3428/55294/10398/8861/9948/22904/5971/10221/23218/3707/1236/25946/4778/87/7048/2185/6722/2194/677/10193/192670/2242/80762/2034/5613/1054/23411/80349/4831/84148/4853/126014/9770/2475/2124/9258/139716/3146/23112/7040	45
GOTERM_BP	GO:0000387	spliceosomal snRNP assembly	11/1221	52/18493	0.000487277	0.0228379	6628/10421/7375/11171/9092/96764/24148/6632/1207/6636/9129	11
GOTERM_BP	GO:0002407	dendritic cell chemotaxis	7/1221	23/18493	0.000515551	0.0235667	3577/6352/1236/5294/7226/708/3146	7
GOTERM_BP	GO:1904380	endoplasmic reticulum mannose trimming	6/1221	17/18493	0.000537789	0.0235667	7844/6400/267/10956/56886/55757	6
GOTERM_BP	GO:0007051	spindle organization	23/1221	165/18493	0.000538113	0.0235667	3796/6188/203068/2316/26054/10636/5119/8658/23636/440145/8841/1778/85378/10844/10274/8243/5116/153241/23122/5901/6905/5518/128866	23
GOTERM_BP	GO:0006517	protein deglycosylation	8/1221	30/18493	0.000557625	0.0240273	4121/4124/7844/6400/267/10956/56886/55757	8
GOTERM_BP	GO:0002478	antigen processing and presentation of exogenous peptide antigen	19/1221	126/18493	0.000601391	0.0257059	3796/3107/972/2207/6892/832/6890/4012/22872/1783/1778/10484/64837/8905/114876/3831/3835/3106/164	19
GOTERM_BP	GO:0019080	viral gene expression	12/1221	62/18493	0.000645245	0.0270703	10410/6352/6667/1025/6737/9150/22879/29969/51386/8665/23076/55223	12
GOTERM_BP	GO:0031348	negative regulation of defense response	26/1221	199/18493	0.000665984	0.0270703	7132/5788/5692/3428/5272/9021/113/171389/10475/4088/2950/55737/58509/79004/5495/27250/80762/613/11213/1398/708/23005/90268/9258/6095/81858	26
GOTERM_BP	GO:0006405	RNA export from nucleus	20/1221	137/18493	0.000668778	0.0270703	29107/54890/5976/10189/9972/23144/10482/23636/29894/26019/348995/100101267/57122/64062/54439/53981/51362/5901/9887/6059	20
GOTERM_BP	GO:1901653	cellular response to peptide	40/1221	356/18493	0.000701964	0.0282	896/4149/5567/10365/10890/4303/6667/6599/9021/8651/113/2950/677/23433/51606/51043/51382/208/57727/533/6654/23411/207/9847/1979/26060/1398/4644/4193/5140/6720/2931/8992/4929/7249/5447/6715/9882/140710/7040	40
GOTERM_BP	GO:0018393	internal peptidyl-lysine acetylation	22/1221	158/18493	0.000714	0.0282585	23558/8861/6881/339287/6872/55209/2648/84289/55167/90780/23411/84148/5187/11143/29117/9329/9252/57634/23741/5447/9913/7040	22
GOTERM_BP	GO:0006611	protein export from nucleus	24/1221	180/18493	0.000788728	0.0305375	29107/55437/54890/5976/10189/9972/2010/23144/10482/23636/5494/29894/26019/348995/100101267/57154/57122/4193/53981/51362/5901/9887/6059/7040	24
GOTERM_BP	GO:0043434	response to peptide hormone	45/1221	417/18493	0.000799014	0.0307132	6678/896/4149/5567/10890/4303/6667/6599/9021/8651/113/2950/677/3030/23433/51606/51043/51382/208/57727/533/6654/23411/4831/6272/207/9847/1979/26060/1398/2475/4644/4193/5140/6720/2931/8992/4929/7249/5447/6715/9882/140710/694/7040	45
GOTERM_BP	GO:0018205	peptidyl-lysine modification	40/1221	361/18493	0.000920329	0.033048	23558/8861/26054/6881/51564/339287/23476/63925/6872/10210/55209/9759/2648/2145/79813/84289/55167/90780/51588/23411/80349/9869/84148/83852/26168/205564/5187/59343/11143/29117/4193/9329/9252/51218/57634/23741/5447/54904/9913/7040	40
GOTERM_BP	GO:0048872	homeostasis of number of cells	30/1221	248/18493	0.000978323	0.0338036	972/3148/2207/10365/8861/3575/6868/3707/3162/578/1236/6722/677/2034/5027/6654/1054/613/5366/207/54542/9770/9258/6218/8314/202309/54700/3146/51542/7040	30
GOTERM_BP	GO:0015931	nucleobase-containing compound transport	29/1221	237/18493	0.000983202	0.0338036	29107/54890/5976/10189/9972/7048/23144/10482/8658/23636/677/9804/5027/6421/29894/26019/348995/100101267/59343/57122/64062/10128/54439/53981/347734/51362/5901/9887/6059	29
GOTERM_BP	GO:0019083	viral transcription	10/1221	48/18493	0.000987864	0.0338036	10410/6352/6667/1025/6737/9150/22879/29969/23076/55223	10
GOTERM_BP	GO:0006310	DNA recombination	33/1221	282/18493	0.00100035	0.0338036	3148/6778/5788/6118/3575/5885/4841/23304/10189/56897/165918/472/80762/6421/84464/23064/9400/116138/92797/10432/51149/10213/79677/23514/151987/55317/80198/5965/7158/27301/23529/3146/7040	33
GOTERM_BP	GO:0034637	cellular carbohydrate biosynthetic process	14/1221	83/18493	0.00100595	0.0338036	55454/2683/208/207/8445/2475/2632/2931/54928/90673/5236/89801/2131/55790	14
GOTERM_BP	GO:0000271	polysaccharide biosynthetic process	13/1221	74/18493	0.0010197	0.0340515	55454/208/207/8445/2475/2632/2931/90673/5236/89801/2131/55790/7040	13
GOTERM_BP	GO:0006475	internal protein amino acid acetylation	22/1221	163/18493	0.0010873	0.0358608	23558/8861/6881/339287/6872/55209/2648/84289/55167/90780/23411/84148/5187/11143/29117/9329/9252/57634/23741/5447/9913/7040	22
GOTERM_BP	GO:0042093	T-helper cell differentiation	11/1221	57/18493	0.00109965	0.0360454	6778/602/5971/64332/51043/10892/114836/54542/2475/6095/3146	11
GOTERM_BP	GO:0016573	histone acetylation	21/1221	153/18493	0.0011247	0.0362159	23558/8861/6881/339287/6872/55209/2648/84289/55167/90780/23411/84148/5187/11143/29117/9329/9252/57634/23741/9913/7040	21
GOTERM_BP	GO:0042147	retrograde transport, endosome to Golgi	14/1221	84/18493	0.00113522	0.0362159	5870/8677/55737/9043/80148/253725/10139/9827/9648/9559/100287171/63893/64145/51542	14
GOTERM_BP	GO:0036336	dendritic cell migration	7/1221	26/18493	0.00116192	0.0365185	3577/6352/1236/5294/7226/708/3146	7
GOTERM_BP	GO:0016482	cytosolic transport	21/1221	154/18493	0.00122319	0.0379971	5870/2060/8677/55737/9043/80148/2580/253725/124997/22853/10139/6272/9827/9648/9559/100287171/63893/54832/64145/164/51542	21
GOTERM_BP	GO:0019884	antigen processing and presentation of exogenous antigen	19/1221	134/18493	0.00128555	0.0396365	3796/3107/972/2207/6892/832/6890/4012/22872/1783/1778/10484/64837/8905/114876/3831/3835/3106/164	19
GOTERM_BP	GO:0010256	endomembrane system organization	43/1221	403/18493	0.00129121	0.0396365	5788/10890/51112/10960/81671/1452/5119/6711/51160/25946/2010/64689/93343/57003/57198/2580/55014/55654/83452/208/5027/9144/399687/388552/23345/55113/274/9648/3064/207/10484/64083/123720/91754/26509/10015/137492/8027/10142/64145/23122/128866/728498	43
GOTERM_BP	GO:0010507	negative regulation of autophagy	13/1221	76/18493	0.0013168	0.0399752	1982/51520/3162/1611/10193/207/100287171/23274/2475/7249/128866/257397/56893	13
GOTERM_BP	GO:0034976	response to endoplasmic reticulum stress	31/1221	264/18493	0.00132438	0.0399782	468/4217/1388/578/23645/10961/5034/57003/9601/7844/22872/2137/92305/2081/23411/6400/116138/5366/267/1200/10956/54788/2931/54557/51060/56886/8795/55757/9354/54431/8720	31
GOTERM_BP	GO:0051651	maintenance of location in cell	15/1221	95/18493	0.00135858	0.0406192	2495/602/10210/81573/55187/2548/11344/23345/207/64083/10956/54832/10142/6500/9913	15
GOTERM_BP	GO:0043543	protein acylation	29/1221	242/18493	0.00136349	0.0406192	23558/57551/8861/6881/339287/6872/55209/5494/5495/2648/84289/55167/90780/23411/84148/253832/55625/5187/11143/29117/254359/9329/9252/57634/80155/23741/5447/9913/7040	29
GOTERM_BP	GO:0018394	peptidyl-lysine acetylation	22/1221	166/18493	0.00138363	0.0406194	23558/8861/6881/339287/6872/55209/2648/84289/55167/90780/23411/84148/5187/11143/29117/9329/9252/57634/23741/5447/9913/7040	22
GOTERM_BP	GO:0010212	response to ionizing radiation	20/1221	146/18493	0.001494	0.0424597	51720/5788/3428/598/1936/578/9112/165918/3735/472/84328/1788/23411/9400/51149/23514/4193/2140/7158/7040	20
GOTERM_BP	GO:0033692	cellular polysaccharide biosynthetic process	12/1221	68/18493	0.00150988	0.0426841	55454/208/207/8445/2475/2632/2931/90673/5236/89801/2131/55790	12
GOTERM_BP	GO:0030041	actin filament polymerization	23/1221	178/18493	0.00153634	0.0432035	10095/832/51734/10435/6711/1236/2185/9535/91663/253725/10602/9113/8522/11344/274/100287171/123720/2475/11078/253260/6710/55604/348110	23
GOTERM_BP	GO:0006606	protein import into nucleus	21/1221	157/18493	0.00156416	0.0435276	2316/602/29107/4088/9972/23636/8841/10628/473/11142/23411/30000/207/100101267/57122/29969/23633/7249/5901/8720/7040	21
GOTERM_BP	GO:0007033	vacuole organization	21/1221	157/18493	0.00156416	0.0435276	81671/23130/4124/55737/80208/55014/83452/2548/5027/23241/58476/79158/55858/5287/1200/57154/7942/55102/128866/54664/8720	21
GOTERM_BP	GO:0006892	post-Golgi vesicle-mediated transport	15/1221	97/18493	0.00168398	0.0452953	10890/6845/6711/2060/2580/10139/6272/64083/6102/4644/54832/55770/64145/164/51542	15
GOTERM_BP	GO:0039702	viral budding via host ESCRT complex	6/1221	21/18493	0.00187706	0.048522	5119/51160/93343/10015/137492/128866	6
GOTERM_BP	GO:0007052	mitotic spindle organization	16/1221	108/18493	0.00189962	0.0487964	3796/2316/5119/8658/23636/440145/1778/85378/10844/10274/8243/5116/23122/5901/6905/128866	16
GOTERM_MF	GO:0019787	ubiquitin-like protein transferase activity	54/1230	421/17632	1.02055e-05	0.00493945	55294/10616/51564/144699/9039/57162/7323/51070/54620/6872/223082/23304/10210/8916/997/92912/9759/10193/165918/11060/10116/7844/6737/9040/55743/10892/92305/55167/51588/7321/150726/25831/50862/283450/54542/23759/267/8924/91694/63893/57154/4193/25820/54778/64839/81858/6500/8065/9354/25897/9781/6477/55223/2188	54
GOTERM_MF	GO:0004842	ubiquitin-protein transferase activity	50/1230	396/17632	3.27021e-05	0.0105519	55294/10616/144699/57162/7323/51070/54620/6872/223082/23304/10210/8916/997/92912/10193/165918/11060/10116/7844/6737/9040/55743/10892/92305/55167/7321/150726/25831/50862/283450/54542/23759/267/8924/91694/63893/57154/4193/25820/54778/64839/81858/6500/8065/9354/25897/9781/6477/55223/2188	50
GOTERM_MF	GO:0004674	protein serine/threonine kinase activity	53/1230	455/17632	0.000163794	0.0264254	81788/57551/896/5567/4217/9262/57162/51422/23476/1452/6872/55437/7048/2185/3985/5294/1025/6789/5571/8895/472/51765/2580/5062/23012/208/5613/22853/2081/9113/613/4831/7204/375449/5218/9748/207/5608/8445/5257/10645/11213/150094/6733/91754/2475/817/2931/9252/55589/146057/8550/4052	53
GOTERM_MF	GO:0005096	GTPase activator activity	36/1230	279/17632	0.000260451	0.0360167	6001/9138/9938/9744/10636/10435/51520/64744/5902/9605/116986/28964/23526/79658/8853/192111/23232/6654/9826/4943/613/23527/57186/10484/79874/6102/1122/23380/396/10144/57148/7249/201176/9693/8831/9882	36
GOTERM_MF	GO:0015037	peptide disulfide oxidoreductase activity	6/1230	15/17632	0.000329245	0.0398386	2936/5034/9601/10539/51060/51218	6
GOTERM_MF	GO:0043021	ribonucleoprotein complex binding	24/1230	128/17632	7.54213e-06	0.00493945	7458/10421/10289/5935/8531/54915/24148/3954/6731/6632/1655/2107/55147/708/2475/4193/342618/60678/253260/80315/80155/9887/6059/84295	24
GOTERM_MF	GO:0042393	histone binding	29/1230	195/17632	8.80452e-05	0.0213069	5757/51720/23476/5927/6872/8658/54799/165918/114825/84289/57680/90780/23411/84148/5253/8467/54454/81611/6595/11143/29117/727866/10765/7158/4300/10927/6907/29057/84295	29
GOTERM_MF	GO:0140030	modification-dependent protein binding	23/1230	142/17632	0.00012625	0.0244421	51720/55793/23476/5927/6872/2060/54799/165918/124997/84289/57680/84148/5253/54454/29117/727866/10765/81858/7158/4300/10927/29057/56893	23
GOTERM_CC	GO:0005765	lysosomal membrane	43/1277	344/19659	2.86567e-05	0.00207735	972/10410/79026/10970/6845/9725/7311/79036/4012/223082/2683/55737/55717/79803/80208/56928/8895/51606/23250/51382/124997/2548/9842/201475/6272/8417/10396/79888/8905/59345/55858/7226/92979/23274/2475/84888/2773/55317/164/54664/53373/6560/401258	43
GOTERM_CC	GO:0034708	methyltransferase complex	18/1277	116/19659	0.000484337	0.0112901	4149/23135/6628/63925/5927/6872/2145/130557/57680/23411/6632/84148/26168/79084/1207/6636/10765/11108	18
GOTERM_CC	GO:0000151	ubiquitin ligase complex	31/1277	275/19659	0.00197592	0.0318029	10048/55294/10616/144699/51646/7323/54620/339745/23304/79269/10210/51343/165918/11060/8816/54876/25852/6737/7321/6400/8445/10956/90268/25820/64839/81858/6500/8065/9354/25897/9781	31
GOTERM_CC	GO:1904949	ATPase complex	15/1277	102/19659	0.00239257	0.0366547	55249/9219/6599/9112/6603/10347/11194/8467/81611/476/26060/6595/6604/57634/23506	15
GOTERM_CC	GO:0101002	ficolin-1-rich granule	31/1277	185/19659	1.04239e-06	0.000704658	2495/226/2207/11314/823/1604/23218/3101/51646/22918/3614/7077/2950/8778/9535/1315/5265/4860/2548/5049/116844/4831/124583/5709/7226/10213/5713/5236/23406/3146/2219	31
GOTERM_CC	GO:0016605	PML body	20/1277	98/19659	4.03614e-06	0.00136421	4149/29855/6118/10636/4778/10210/9683/1025/56478/2000/11262/55743/51588/23411/58476/79677/59343/7874/2475/54778	20
GOTERM_CC	GO:0010008	endosome membrane	55/1277	462/19659	1.00155e-05	0.00199263	3107/10410/10890/9744/6845/7311/9784/93380/7323/5119/2060/51160/223082/124460/5867/11021/55737/93343/79666/79803/56928/78992/80762/253725/124997/9842/54521/533/201475/10347/9727/23527/6272/8417/81609/9559/100287171/26060/55858/23274/84888/55317/137492/22841/8992/8027/3106/64145/57732/128866/257397/22876/54664/9781/53373	55
GOTERM_CC	GO:0005681	spliceosomal complex	28/1277	179/19659	1.31445e-05	0.00199263	3190/26986/6628/7536/11157/9092/5935/5976/10189/51322/51503/8449/10492/58509/22913/1665/24148/3183/10236/6632/1655/84950/55660/6636/9129/51362/55131/57703	28
GOTERM_CC	GO:1904813	ficolin-1-rich granule lumen	22/1277	124/19659	1.47384e-05	0.00199263	2495/226/823/3101/51646/3614/7077/2950/9535/5265/4860/5049/116844/4831/124583/5709/10213/5713/5236/23406/3146/2219	22
GOTERM_CC	GO:0016607	nuclear speck	47/1277	382/19659	1.87496e-05	0.00207735	10970/8525/4303/10421/3428/29107/9092/1452/4841/54890/64332/10189/51322/51503/8241/10210/1609/10482/997/58509/56478/50809/1665/24148/2034/9879/6421/9698/84441/10432/6651/79677/3835/55660/8930/4929/57634/54439/163486/9129/55105/55589/143684/57703/5501/55604/2908	47
GOTERM_CC	GO:0005774	vacuolar membrane	48/1277	397/19659	2.42315e-05	0.00207735	972/10410/79026/10970/6845/9725/7311/79036/81671/4012/223082/2683/55737/55717/79803/80208/56928/8895/63908/51606/23250/55014/51382/124997/9583/2548/9842/533/201475/6272/8417/10396/79888/8905/59345/55858/7226/92979/23274/2475/84888/2773/55317/164/54664/53373/6560/401258	48
GOTERM_CC	GO:0036464	cytoplasmic ribonucleoprotein granule	30/1277	207/19659	2.99155e-05	0.00207735	4154/3190/203068/26986/10970/26065/11157/8651/60489/8994/5976/64332/9513/677/1025/56478/192670/6737/23589/9698/57532/26019/23345/55147/54542/53339/4691/23741/23185/23112	30
GOTERM_CC	GO:0098852	lytic vacuole membrane	43/1277	345/19659	3.073e-05	0.00207735	972/10410/79026/10970/6845/9725/7311/79036/4012/223082/2683/55737/55717/79803/80208/56928/8895/51606/23250/51382/124997/2548/9842/201475/6272/8417/10396/79888/8905/59345/55858/7226/92979/23274/2475/84888/2773/55317/164/54664/53373/6560/401258	43
GOTERM_CC	GO:0071013	catalytic step 2 spliceosome	17/1277	87/19659	3.78552e-05	0.00232637	3190/26986/6628/9092/10189/51503/10492/58509/22913/24148/3183/10236/6632/1655/6636/51362/57703	17
GOTERM_CC	GO:0000775	chromosome, centromeric region	28/1277	194/19659	5.8551e-05	0.00329837	8379/5885/51112/1452/23157/8658/5515/1788/1783/84148/23047/5253/348995/9184/10274/23244/11243/57122/9770/3835/8243/23122/5518/7158/5501/147841/84295/253635	28
GOTERM_CC	GO:0035770	ribonucleoprotein granule	30/1277	219/19659	8.67174e-05	0.00448375	4154/3190/203068/26986/10970/26065/11157/8651/60489/8994/5976/64332/9513/677/1025/56478/192670/6737/23589/9698/57532/26019/23345/55147/54542/53339/4691/23741/23185/23112	30
GOTERM_CC	GO:0030176	integral component of endoplasmic reticulum membrane	23/1277	149/19659	9.28588e-05	0.00448375	3107/23770/972/6892/1388/6890/93380/6238/84649/56928/54020/2081/23471/8879/7095/267/22845/54788/84888/3106/55331/347734/2131	23
GOTERM_CC	GO:0005793	endoplasmic reticulum-Golgi intermediate compartment	20/1277	123/19659	0.000126092	0.00568253	9262/6892/1604/6890/51112/10960/81671/4121/5034/64689/1315/5265/55014/399687/4924/123720/57222/56886/55757/3146	20
GOTERM_CC	GO:0098687	chromosomal region	41/1277	346/19659	0.000143918	0.00581198	8379/6118/5885/51112/1452/5976/10189/56897/23157/8658/5515/472/26277/80351/5424/84464/1788/23064/1783/84148/23047/5253/348995/9184/10274/23244/79677/11243/57122/9770/3835/8243/80169/23122/5518/7158/9878/5501/147841/84295/253635	41
GOTERM_CC	GO:0034399	nuclear periphery	21/1277	134/19659	0.000148108	0.00581198	6678/468/9782/5885/5119/4841/9612/9972/1609/26277/6421/1788/51588/84148/30000/10274/57122/8243/55660/6310/26012	21
GOTERM_CC	GO:0070820	tertiary granule	24/1277	164/19659	0.000154757	0.00581198	2495/226/2207/1265/11314/1604/9725/23218/51646/22918/7077/8778/1315/23250/25852/2548/116844/8417/124583/7226/126014/5236/81619/5473	24
GOTERM_CC	GO:0031227	intrinsic component of endoplasmic reticulum membrane	23/1277	157/19659	0.000206973	0.00721905	3107/23770/972/6892/1388/6890/93380/6238/84649/56928/54020/2081/23471/8879/7095/267/22845/54788/84888/3106/55331/347734/2131	23
GOTERM_CC	GO:0005769	early endosome	40/1277	341/19659	0.000213581	0.00721905	3107/933/9784/93380/5119/2060/4012/51160/124460/5867/55737/79666/79803/23250/253725/124997/55654/208/22853/10347/57561/6272/8417/4924/81609/9559/100287171/79874/8073/26060/55858/4644/91947/8027/3106/64145/57732/3146/22876/6477	40
GOTERM_CC	GO:0034774	secretory granule lumen	38/1277	321/19659	0.000252709	0.0079897	6678/226/203068/25801/1265/3101/10577/10383/2588/7423/87/3614/7077/2950/9535/23526/5265/4860/25852/5049/116844/4831/1778/124583/5709/10213/126014/5713/23593/3959/23406/1774/3146/7040/5473/22915/7424/2219	38
GOTERM_CC	GO:0005635	nuclear envelope	50/1277	461/19659	0.00026002	0.0079897	203068/6778/8379/598/9782/29107/171389/5902/26173/9112/4088/9972/2010/10482/8658/51343/23636/3930/79004/11262/80351/5027/2081/25972/169714/23411/30000/6272/23345/274/348995/9801/9123/84950/100101267/59343/51096/57122/26509/54788/6720/10128/727866/26012/23633/3710/5901/128866/10927/29057	50
GOTERM_CC	GO:0000790	nuclear chromatin	42/1277	369/19659	0.000288294	0.00818973	23558/3190/3148/4149/6778/10365/3659/8861/6667/55249/9219/6599/6872/25946/9112/57658/9612/4088/6603/6722/1025/6925/2648/3183/84464/1788/23411/84148/138151/116138/8338/8467/81611/26060/6595/6604/64426/11143/57634/23506/26012/3146	42
GOTERM_CC	GO:0000932	P-body	15/1277	84/19659	0.000302874	0.00818973	26065/11157/60489/8994/5976/677/56478/192670/6737/23589/9698/23345/54542/53339/23112	15
GOTERM_CC	GO:0017053	transcriptional repressor complex	15/1277	84/19659	0.000302874	0.00818973	5971/6667/9219/9112/9612/9759/8841/23411/55758/8467/23186/26060/1488/6907/3146	15
GOTERM_CC	GO:0005802	trans-Golgi network	29/1277	225/19659	0.000325407	0.00846059	972/10890/5870/6845/79090/8677/55717/80148/78992/23250/56548/84342/55627/201475/10139/10396/399687/9827/9648/4924/636/64083/122618/8905/55858/92979/23122/164/51542	29
GOTERM_CC	GO:0000776	kinetochore	20/1277	133/19659	0.000369395	0.00924855	8379/51112/1452/23157/1783/84148/5253/348995/9184/11243/57122/9770/3835/8243/23122/7158/5501/147841/84295/253635	20
GOTERM_CC	GO:0030667	secretory granule membrane	35/1277	295/19659	0.00041706	0.010069	6678/2207/10970/3577/5788/10890/5870/11314/1604/6845/9725/23218/84329/22918/27180/334/8778/2683/259215/1315/8895/23250/51382/2548/64924/8694/10396/79888/3163/7226/5795/3710/10184/81619/401258	35
GOTERM_CC	GO:0016363	nuclear matrix	17/1277	108/19659	0.000580685	0.0130848	6678/9782/5885/5119/4841/9612/1609/26277/6421/1788/51588/84148/10274/8243/55660/6310/26012	17
GOTERM_CC	GO:0034709	methylosome	5/1277	12/19659	0.000617991	0.0134762	6628/6632/79084/1207/6636	5
GOTERM_CC	GO:0060205	cytoplasmic vesicle lumen	38/1277	338/19659	0.000694127	0.0144198	6678/226/203068/25801/1265/3101/10577/10383/2588/7423/87/3614/7077/2950/9535/23526/5265/4860/25852/5049/116844/4831/1778/124583/5709/10213/126014/5713/23593/3959/23406/1774/3146/7040/5473/22915/7424/2219	38
GOTERM_CC	GO:1904724	tertiary granule lumen	11/1277	55/19659	0.000703923	0.0144198	2495/226/1265/51646/7077/25852/116844/124583/126014/5236/5473	11
GOTERM_CC	GO:0031983	vesicle lumen	38/1277	339/19659	0.000734116	0.014596	6678/226/203068/25801/1265/3101/10577/10383/2588/7423/87/3614/7077/2950/9535/23526/5265/4860/25852/5049/116844/4831/1778/124583/5709/10213/126014/5713/23593/3959/23406/1774/3146/7040/5473/22915/7424/2219	38
GOTERM_CC	GO:0031901	early endosome membrane	20/1277	143/19659	0.000949449	0.0183379	3107/93380/2060/124460/5867/79666/79803/253725/124997/10347/8417/81609/100287171/26060/55858/8027/3106/64145/57732/22876	20
GOTERM_CC	GO:0000922	spindle pole	21/1277	154/19659	0.00100042	0.0187857	3796/8379/10636/808/51646/10101/2010/10210/8658/23636/5515/9150/9113/9731/85378/10844/10274/8243/23005/11186/10300	21
GOTERM_CC	GO:0000777	condensed chromosome kinetochore	16/1277	104/19659	0.00107153	0.0195772	8379/1452/23157/5253/348995/9184/11243/57122/9770/8243/23122/7158/5501/147841/84295/253635	16
GOTERM_CC	GO:0005795	Golgi stack	20/1277	145/19659	0.0011309	0.0201181	55454/2530/55959/4124/2683/78992/11313/8853/6272/23268/4924/64083/124583/92979/55512/22856/10142/8720/55790/728498	20
GOTERM_CC	GO:0031965	nuclear membrane	34/1277	302/19659	0.00126077	0.0218533	6778/598/9782/171389/26173/4088/9972/2010/8658/51343/23636/3930/79004/5027/2081/25972/169714/23411/30000/6272/23345/9801/9123/84950/100101267/59343/51096/57122/26509/54788/10128/26012/3710/10927	34
GOTERM_CC	GO:0015629	actin cytoskeleton	49/1277	483/19659	0.00131295	0.0221889	226/3190/2316/7402/79026/1265/9262/10095/7169/10398/9948/832/64098/24138/51734/6868/6711/10801/7171/87/91663/9696/9759/7739/23433/56928/3183/10602/23012/57727/23607/8522/11344/399687/4046/274/1398/26512/4644/23384/11078/10015/6710/92521/31/5236/23002/55604/57565	49
GOTERM_CC	GO:0005684	U2-type spliceosomal complex	13/1277	78/19659	0.00145596	0.0240057	6628/11157/9092/51503/1665/24148/6632/84950/55660/6636/9129/51362/57703	13
GOTERM_CC	GO:0005770	late endosome	28/1277	243/19659	0.0023137	0.0363735	973/972/10410/338692/6845/5119/51160/55737/93343/78992/124997/1783/22879/8417/3064/100287171/55858/23274/114876/4644/84888/55317/79443/137492/9693/128866/57498/54664	28
GOTERM_CC	GO:0000793	condensed chromosome	26/1277	221/19659	0.00244003	0.0366547	3148/8379/6118/23476/5885/1452/5119/23157/5253/8467/348995/9184/10274/79677/11243/57122/9770/8243/10128/23122/7158/5501/3146/147841/84295/253635	26
GOTERM_CC	GO:0055037	recycling endosome	21/1277	167/19659	0.00276821	0.0406807	3107/3688/10890/9744/80223/933/5867/11021/23250/22853/201475/9727/8417/100287171/4644/23080/22841/3106/164/5901/22876	21
GOTERM_CC	GO:0044450	microtubule organizing center part	22/1277	179/19659	0.00296465	0.0426405	3796/132320/10101/27241/10210/8658/9696/440145/80351/3064/100287171/9731/85378/6102/8924/10844/9857/5116/153241/10300/5901/146057	22
GOTERM_CC	GO:0070603	SWI/SNF superfamily-type complex	12/1277	76/19659	0.00347757	0.048929	55249/9219/6599/9112/6603/8467/81611/26060/6595/6604/57634/23506	12
GOTERM_CC	GO:0044322	endoplasmic reticulum quality control compartment	6/1277	24/19659	0.00362329	0.048929	7844/6400/267/10956/56886/55757	6
GOTERM_CC	GO:0042581	specific granule	20/1277	160/19659	0.00368989	0.048929	1265/10970/9725/84329/22918/7077/23250/25852/51382/116844/8694/10396/3163/124583/7226/126014/5795/1774/81619/401258	20
GOTERM_CC	GO:0000779	condensed chromosome, centromeric region	16/1277	117/19659	0.00369139	0.048929	8379/1452/23157/5253/348995/9184/11243/57122/9770/8243/23122/7158/5501/147841/84295/253635	16
KEGG_PATHWAY	hsa04120	Ubiquitin mediated proteolysis	23/611	137/7839	0.00034044	0.0248521	55294/9039/7323/9021/8651/8916/997/51343/92912/11060/9040/51588/7321/23759/8924/63893/57154/4193/6500/55236/8065/9354/6477	23
KEGG_PATHWAY	hsa04141	Protein processing in endoplasmic reticulum	32/611	165/7839	1.06263e-06	0.000310287	468/10970/4217/823/1388/3337/7323/10960/6238/578/23645/10961/4121/5034/9601/22872/2081/23471/7321/6400/7095/10484/267/573/10956/54788/56886/6500/55757/54431/56893/8720	32
KEGG_PATHWAY	hsa04144	Endocytosis	40/611	244/7839	4.48997e-06	0.000655536	3107/3577/10890/10095/9744/832/64744/80223/5119/2060/51160/4088/5867/7048/58513/11021/116986/55737/28964/93343/10193/253725/84612/8853/9727/23527/9266/274/56904/9559/100287171/57154/4193/10015/137492/22841/8027/3106/64145/128866	40
KEGG_PATHWAY	hsa04910	Insulin signaling pathway	24/611	137/7839	0.000129833	0.0126371	5567/808/3101/51422/9021/8651/2194/5571/122809/23433/208/6654/207/1399/5257/1398/2475/5140/6720/90673/31/7249/89801/5501	24
KEGG_PATHWAY	hsa05163	Human cytomegalovirus infection	32/611	225/7839	0.00060325	0.0293582	3107/468/9138/7132/5567/6892/6352/1388/808/6890/6667/113/3570/578/2185/54331/5331/208/6654/9826/207/1399/5608/59345/1398/2475/4193/2773/3106/5533/7249/3710	32
KEGG_PATHWAY	hsa05170	Human immunodeficiency virus 1 infection	31/611	212/7839	0.000451328	0.0263575	3107/7132/6892/598/808/6890/200315/60489/578/2185/3985/54331/472/5336/5062/208/5335/207/1399/5608/8905/59345/1398/2475/2773/3106/5533/3710/164/6500/8065	31

## Sheet: down_Type1_vs_Type2
Supplementary Table S5 The significant pathways enriched by DEGs between different HSPN types
Category	ID	Description	GeneRatio	BgRatio	pvalue	FDR	geneID	Count
GOTERM_BP	GO:0006401	RNA catabolic process	7/43	340/18493	1.21766e-05	0.000995438	6129/6204/6157/6188/6176/6205/7534	7
GOTERM_BP	GO:0000956	nuclear-transcribed mRNA catabolic process	6/43	207/18493	7.89621e-06	0.000704198	6129/6204/6157/6188/6176/6205	6
GOTERM_BP	GO:0033119	negative regulation of RNA splicing	3/43	25/18493	2.59881e-05	0.0019611	7009/3181/3190	3
GOTERM_BP	GO:0045047	protein targeting to ER	6/43	117/18493	2.83863e-07	5.66418e-05	6129/6204/6157/6188/6176/6205	6
GOTERM_BP	GO:0006413	translational initiation	7/43	194/18493	2.93713e-07	5.66418e-05	6129/6204/6157/6188/6176/1982/6205	7
GOTERM_BP	GO:0006402	mRNA catabolic process	7/43	307/18493	6.2634e-06	0.000682711	6129/6204/6157/6188/6176/6205/7534	7
GOTERM_BP	GO:0090150	establishment of protein localization to membrane	7/43	317/18493	7.72248e-06	0.000704198	6129/6204/6157/6188/6176/6205/7534	7
GOTERM_BP	GO:0006605	protein targeting	7/43	424/18493	5.00559e-05	0.00350749	6129/6204/6157/6188/6176/6205/7534	7
GOTERM_BP	GO:0006614	SRP-dependent cotranslational protein targeting to membrane	6/43	105/18493	1.4911e-07	5.66418e-05	6129/6204/6157/6188/6176/6205	6
GOTERM_BP	GO:0006613	cotranslational protein targeting to membrane	6/43	109/18493	1.86338e-07	5.66418e-05	6129/6204/6157/6188/6176/6205	6
GOTERM_BP	GO:0000184	nuclear-transcribed mRNA catabolic process, nonsense-mediated decay	6/43	120/18493	3.29821e-07	5.66418e-05	6129/6204/6157/6188/6176/6205	6
GOTERM_BP	GO:0072599	establishment of protein localization to endoplasmic reticulum	6/43	121/18493	3.46433e-07	5.66418e-05	6129/6204/6157/6188/6176/6205	6
GOTERM_BP	GO:0070972	protein localization to endoplasmic reticulum	6/43	146/18493	1.04674e-06	0.000146694	6129/6204/6157/6188/6176/6205	6
GOTERM_BP	GO:0006612	protein targeting to membrane	6/43	198/18493	6.12146e-06	0.000682711	6129/6204/6157/6188/6176/6205	6
GOTERM_BP	GO:0033631	cell-cell adhesion mediated by integrin	2/43	15/18493	0.000543965	0.0355753	3688/83706	2
GOTERM_MF	GO:0045296	cadherin binding	7/42	323/17632	1.00909e-05	0.000544908	51429/6624/5216/1982/7534/3688/3190	7
GOTERM_MF	GO:0008253	5'-nucleotidase activity	2/42	13/17632	0.000424936	0.0172099	4907/51251	2
GOTERM_MF	GO:0050839	cell adhesion molecule binding	9/42	486/17632	1.69252e-06	0.000274188	51429/6624/5216/2335/1982/7534/3688/83706/3190	9
GOTERM_MF	GO:0003735	structural constituent of ribosome	6/42	200/17632	7.37695e-06	0.000544908	6129/6204/6157/6188/6176/6205	6
GOTERM_MF	GO:0008252	nucleotidase activity	2/42	15/17632	0.000570303	0.0184778	4907/51251	2
GOTERM_CC	GO:0031093	platelet alpha granule lumen	3/42	67/19659	0.00039495	0.00483813	2335/83706/2162	3
GOTERM_CC	GO:0031091	platelet alpha granule	3/42	91/19659	0.000966568	0.00888034	2335/83706/2162	3
GOTERM_CC	GO:0005925	focal adhesion	12/42	402/19659	2.88676e-11	1.72768e-09	6129/6204/5216/6188/6176/10487/6251/6205/7534/3688/60/3190	12
GOTERM_CC	GO:0005924	cell-substrate adherens junction	12/42	405/19659	3.14653e-11	1.72768e-09	6129/6204/5216/6188/6176/10487/6251/6205/7534/3688/60/3190	12
GOTERM_CC	GO:0030055	cell-substrate junction	12/42	409/19659	3.52589e-11	1.72768e-09	6129/6204/5216/6188/6176/10487/6251/6205/7534/3688/60/3190	12
GOTERM_CC	GO:0022626	cytosolic ribosome	6/42	115/19659	1.55224e-07	5.70448e-06	6129/6204/6157/6188/6176/6205	6
GOTERM_CC	GO:0044391	ribosomal subunit	6/42	191/19659	3.04902e-06	8.96411e-05	6129/6204/6157/6188/6176/6205	6
GOTERM_CC	GO:0044445	cytosolic part	6/42	250/19659	1.42376e-05	0.00031212	6129/6204/6157/6188/6176/6205	6
GOTERM_CC	GO:0005840	ribosome	6/42	276/19659	2.48858e-05	0.000457277	6129/6204/6157/6188/6176/6205	6
GOTERM_CC	GO:0072562	blood microparticle	5/42	147/19659	1.48629e-05	0.00031212	5216/2335/7534/60/2162	5
GOTERM_CC	GO:0015629	actin cytoskeleton	5/42	483/19659	0.0035264	0.028799	6624/10487/60/83706/3190	5
GOTERM_CC	GO:0001726	ruffle	4/42	167/19659	0.000437143	0.00494308	51429/6624/6188/3688	4
GOTERM_CC	GO:0034774	secretory granule lumen	4/42	321/19659	0.0047915	0.0370711	2335/10487/83706/2162	4
GOTERM_CC	GO:0060205	cytoplasmic vesicle lumen	4/42	338/19659	0.00574386	0.0406247	2335/10487/83706/2162	4
GOTERM_CC	GO:0031983	vesicle lumen	4/42	339/19659	0.00580353	0.0406247	2335/10487/83706/2162	4
GOTERM_CC	GO:0098978	glutamatergic synapse	4/42	350/19659	0.00648761	0.043349	5216/7534/3688/60	4
GOTERM_CC	GO:0002102	podosome	3/42	30/19659	3.53633e-05	0.0005776	6624/83706/3190	3
GOTERM_CC	GO:0022627	cytosolic small ribosomal subunit	3/42	45/19659	0.000120872	0.00177682	6204/6188/6205	3
GOTERM_CC	GO:0022625	cytosolic large ribosomal subunit	3/42	63/19659	0.000329344	0.00440123	6129/6157/6176	3
GOTERM_CC	GO:0015935	small ribosomal subunit	3/42	73/19659	0.000508228	0.00514154	6204/6188/6205	3
GOTERM_CC	GO:0015934	large ribosomal subunit	3/42	121/19659	0.00219175	0.0189522	6129/6157/6176	3
GOTERM_CC	GO:0071437	invadopodium	2/42	16/19659	0.000524647	0.00514154	6624/3688	2
KEGG_PATHWAY	hsa03010	Ribosome	43674	153/7839	7.89443e-07	5.36821e-05	6129/6204/6157/6188/6176/2197/6205	7
KEGG_PATHWAY	hsa05100	Bacterial invasion of epithelial cells	43552	74/7839	0.00223308	0.0379623	2335/3688/60	3
KEGG_PATHWAY	hsa05130	Pathogenic Escherichia coli infection	43583	55/7839	3.91924e-05	0.00133254	81027/7534/3688/60	4
KEGG_PATHWAY	hsa05131	Shigellosis	43552	65/7839	0.00153736	0.0348468	5216/3688/60	3

## Sheet: up_Type1_vs_Type3
Supplementary Table S5 The significant pathways enriched by DEGs between different HSPN types
Category	ID	Description	GeneRatio	BgRatio	pvalue	FDR	geneID	Count
GOTERM_CC	GO:0015629	actin cytoskeleton	32/646	483/19659	0.000147668	0.0178618	7791/5914/71/79026/9262/1265/103910/64098/399687/10603/2268/9344/87/91663/9696/10801/56928/9181/3183/6455/10015/51411/4046/9759/4644/23384/26512/4637/10602/55604/7414/57565	32
GOTERM_CC	GO:0005635	nuclear envelope	30/646	461/19659	0.00031933	0.0257745	8379/6778/598/29107/5902/240/10482/2010/23225/8658/4927/83860/30000/7112/51343/25972/169714/5027/2081/80314/10128/348995/26509/55787/727866/3710/29057/3708/3267/55161	30
GOTERM_CC	GO:0005774	vacuolar membrane	28/646	397/19659	0.000135101	0.0178618	972/79026/3127/160/6845/10970/81671/2683/80208/81631/55717/2548/56928/968/1601/63908/124997/51382/3920/20/92979/1186/84888/55317/23324/2773/6560/22863	28
GOTERM_CC	GO:0016607	nuclear speck	26/646	382/19659	0.000400959	0.0283178	8106/8525/102724594/9263/29107/3428/22985/10482/51322/6426/10970/56478/1609/8241/9092/10929/23198/55589/3835/8930/57634/143684/55105/5501/2908/55604	26
GOTERM_CC	GO:0005925	focal adhesion	26/646	402/19659	0.000856038	0.0368754	6218/7791/71/26986/79026/2314/5788/1265/3676/64098/87/975/1601/9181/6160/10015/10890/2697/157285/79798/3685/726/3371/5501/1465/7414	26
GOTERM_CC	GO:0005924	cell-substrate adherens junction	26/646	405/19659	0.00095342	0.0368754	6218/7791/71/26986/79026/2314/5788/1265/3676/64098/87/975/1601/9181/6160/10015/10890/2697/157285/79798/3685/726/3371/5501/1465/7414	26
GOTERM_CC	GO:0030055	cell-substrate junction	26/646	409/19659	0.00109815	0.0368754	6218/7791/71/26986/79026/2314/5788/1265/3676/64098/87/975/1601/9181/6160/10015/10890/2697/157285/79798/3685/726/3371/5501/1465/7414	26
GOTERM_CC	GO:0005765	lysosomal membrane	23/646	344/19659	0.00107636	0.0368754	972/79026/3127/160/6845/10970/2683/80208/55717/2548/56928/968/1601/124997/51382/3920/20/92979/1186/84888/55317/2773/6560	23
GOTERM_CC	GO:0098852	lytic vacuole membrane	23/646	345/19659	0.00111861	0.0368754	972/79026/3127/160/6845/10970/2683/80208/55717/2548/56928/968/1601/124997/51382/3920/20/92979/1186/84888/55317/2773/6560	23
GOTERM_CC	GO:0005802	trans-Golgi network	22/646	225/19659	5.45094e-06	0.00307978	972/3127/399687/6845/5870/83696/8677/7045/10133/56548/55717/78992/80148/10139/10890/55627/8674/92979/10565/122618/80262/10079	22
GOTERM_CC	GO:0030667	secretory granule membrane	21/646	295/19659	0.000796443	0.0368754	7305/5788/3683/79930/6845/5870/334/10970/2683/2548/968/51382/8694/10890/3920/3685/3710/3708/10184/158747/135228	21
GOTERM_CC	GO:0005770	late endosome	18/646	243/19659	0.00117479	0.0368754	972/3127/338692/6845/51160/78992/124997/22879/3920/100287171/285195/3064/85377/4644/137492/84888/55317/114876	18
GOTERM_CC	GO:0005681	spliceosomal complex	15/646	179/19659	0.000863142	0.0368754	26986/3181/102724594/5935/51322/6426/7536/9092/10236/51639/3183/25804/11157/1655/85437	15
GOTERM_CC	GO:0005776	autophagosome	11/646	89/19659	0.000158069	0.0178618	2495/5305/81671/58476/10133/81631/124997/3920/100287171/3064/22863	11
GOTERM_CC	GO:0031091	platelet alpha granule	11/646	91/19659	0.000193073	0.018181	6845/87/334/7423/54863/5265/10184/135228/139322/7040/22915	11
GOTERM_CC	GO:0042641	actomyosin	10/646	71/19659	0.000103753	0.0178618	7791/1265/103910/399687/10603/87/10801/10015/9759/4644	10
GOTERM_CC	GO:0005643	nuclear pore	10/646	88/19659	0.000615846	0.0368754	8379/29107/5902/10482/23225/8658/4927/348995/3267/55161	10
GOTERM_CC	GO:0044322	endoplasmic reticulum quality control compartment	5/646	24/19659	0.000953935	0.0368754	7844/6400/10956/80267/55757	5

## Sheet: down_Type1_vs_Type3
Supplementary Table S5 The significant pathways enriched by DEGs between different HSPN types
Category	ID	Description	GeneRatio	BgRatio	pvalue	FDR	geneID	Count
GOTERM_BP	GO:0006605	protein targeting	6/39	424/18493	0.000240928	0.0352671	6232/11154/6203/7316/6224/9349	6
GOTERM_BP	GO:0006614	SRP-dependent cotranslational protein targeting to membrane	4/39	105/18493	6.92625e-05	0.023982	6232/6203/6224/9349	4
GOTERM_BP	GO:0006613	cotranslational protein targeting to membrane	4/39	109/18493	8.01218e-05	0.023982	6232/6203/6224/9349	4
GOTERM_BP	GO:0045047	protein targeting to ER	4/39	117/18493	0.000105488	0.023982	6232/6203/6224/9349	4
GOTERM_BP	GO:0000184	nuclear-transcribed mRNA catabolic process, nonsense-mediated decay	4/39	120/18493	0.000116354	0.023982	6232/6203/6224/9349	4
GOTERM_BP	GO:0072599	establishment of protein localization to endoplasmic reticulum	4/39	121/18493	0.00012015	0.023982	6232/6203/6224/9349	4
GOTERM_BP	GO:0070972	protein localization to endoplasmic reticulum	4/39	146/18493	0.000247364	0.0352671	6232/6203/6224/9349	4
GOTERM_CC	GO:0005925	focal adhesion	6/39	402/19659	0.000129799	0.0042211	391/91624/6203/3190/9349/2316	6
GOTERM_CC	GO:0005924	cell-substrate adherens junction	6/39	405/19659	0.00013517	0.0042211	391/91624/6203/3190/9349/2316	6
GOTERM_CC	GO:0030055	cell-substrate junction	6/39	409/19659	0.000142605	0.0042211	391/91624/6203/3190/9349/2316	6
GOTERM_CC	GO:0022626	cytosolic ribosome	4/39	115/19659	7.8032e-05	0.0042211	6232/6203/6224/9349	4
GOTERM_CC	GO:0044391	ribosomal subunit	4/39	191/19659	0.000544328	0.0115086	6232/6203/6224/9349	4
GOTERM_CC	GO:0044445	cytosolic part	4/39	250/19659	0.00148038	0.0202509	6232/6203/6224/9349	4
GOTERM_CC	GO:0005840	ribosome	4/39	276/19659	0.00212436	0.0202509	6232/6203/6224/9349	4
GOTERM_CC	GO:0022627	cytosolic small ribosomal subunit	3/39	45/19659	9.6687e-05	0.0042211	6232/6203/6224	3
GOTERM_CC	GO:0015935	small ribosomal subunit	3/39	73/19659	0.000407832	0.0100599	6232/6203/6224	3
GOTERM_CC	GO:0044450	microtubule organizing center part	3/39	179/19659	0.00533277	0.0464265	22994/3796/5901	3
GOTERM_CC	GO:0018995	host	2/39	29/19659	0.00150513	0.0202509	7316/5901	2
GOTERM_CC	GO:0043657	host cell	2/39	29/19659	0.00150513	0.0202509	7316/5901	2
GOTERM_CC	GO:0002102	podosome	2/39	30/19659	0.00161062	0.0202509	3190/83706	2
GOTERM_CC	GO:0031904	endosome lumen	2/39	34/19659	0.00206677	0.0202509	1508/11154	2
GOTERM_CC	GO:0044215	other organism	2/39	35/19659	0.00218929	0.0202509	7316/5901	2
GOTERM_CC	GO:0044216	other organism cell	2/39	35/19659	0.00218929	0.0202509	7316/5901	2
GOTERM_CC	GO:0044217	other organism part	2/39	35/19659	0.00218929	0.0202509	7316/5901	2

## Sheet: up_Type2_vs_Type3
Supplementary Table S5 The significant pathways enriched by DEGs between different HSPN types
Category	ID	Description	GeneRatio	BgRatio	pvalue	FDR	geneID	Count
GOTERM_BP	GO:0006605	protein targeting	8/37	424/18493	1.54038e-06	0.0017052	3312/6218/6187/3920/7316/51304/54471/5824	8
GOTERM_BP	GO:0006401	RNA catabolic process	6/37	340/18493	5.31013e-05	0.0195944	3312/6218/6187/7832/7316/4939	6
GOTERM_BP	GO:0016055	Wnt signaling pathway	6/37	463/18493	0.000286793	0.0406126	2869/5499/3611/7316/83999/51741	6
GOTERM_BP	GO:0198738	cell-cell signaling by wnt	6/37	465/18493	0.000293497	0.0406126	2869/5499/3611/7316/83999/51741	6
GOTERM_BP	GO:0006612	protein targeting to membrane	5/37	198/18493	4.41341e-05	0.0195944	6218/6187/51304/54471/5824	5
GOTERM_BP	GO:0006402	mRNA catabolic process	5/37	307/18493	0.000344073	0.042321	3312/6218/6187/7832/7316	5
GOTERM_BP	GO:0090150	establishment of protein localization to membrane	5/37	317/18493	0.000398504	0.0441144	6218/6187/51304/54471/5824	5
GOTERM_BP	GO:0072321	chaperone-mediated protein transport	2/37	10/18493	0.000173516	0.0406126	3312/5824	2
GOTERM_BP	GO:2001241	positive regulation of extrinsic apoptotic signaling pathway in absence of ligand	2/37	11/18493	0.000211808	0.0406126	5499/51741	2
GOTERM_BP	GO:0061684	chaperone-mediated autophagy	2/37	12/18493	0.000253849	0.0406126	3312/3920	2
GOTERM_CC	GO:0005925	focal adhesion	6/37	402/19659	9.57315e-05	0.00568297	3312/6218/6840/6187/10109/3611	6
GOTERM_CC	GO:0005924	cell-substrate adherens junction	6/37	405/19659	9.97188e-05	0.00568297	3312/6218/6840/6187/10109/3611	6
GOTERM_CC	GO:0030055	cell-substrate junction	6/37	409/19659	0.00010524	0.00568297	3312/6218/6840/6187/10109/3611	6
GOTERM_CC	GO:0101002	ficolin-1-rich granule	4/37	185/19659	0.000393305	0.0159288	3312/3920/23406/5718	4
GOTERM_CC	GO:1904813	ficolin-1-rich granule lumen	3/37	124/19659	0.0016273	0.0376603	3312/23406/5718	3
GOTERM_CC	GO:0043034	costamere	2/37	19/19659	0.000577615	0.0187147	6840/3611	2
GOTERM_CC	GO:0002102	podosome	2/37	30/19659	0.00145034	0.0376603	6455/6840	2

## Sheet: down_Type2_vs_Type3
Supplementary Table S5 The significant pathways enriched by DEGs between different HSPN types
Category	ID	Description	GeneRatio	BgRatio	pvalue	FDR	geneID	Count
GOTERM_BP	GO:2000058	regulation of ubiquitin-dependent protein catabolic process	9/131	147/18493	1.02826e-06	0.00255008	6613/57805/7874/9529/64110/6599/5728/9349/2185	9
GOTERM_BP	GO:0042176	regulation of protein catabolic process	13/131	375/18493	2.67346e-06	0.00331509	6613/57805/7874/9529/2534/9554/64110/6599/7879/5709/5728/9349/2185	13
GOTERM_BP	GO:1903050	regulation of proteolysis involved in cellular protein catabolic process	9/131	209/18493	1.82065e-05	0.0123761	6613/57805/7874/9529/64110/6599/5728/9349/2185	9
GOTERM_BP	GO:2000059	negative regulation of ubiquitin-dependent protein catabolic process	5/131	47/18493	1.99614e-05	0.0123761	57805/7874/9529/6599/9349	5
GOTERM_BP	GO:1903362	regulation of cellular protein catabolic process	9/131	242/18493	5.73689e-05	0.028455	6613/57805/7874/9529/64110/6599/5728/9349/2185	9
GOTERM_BP	GO:0032435	negative regulation of proteasomal ubiquitin-dependent protein catabolic process	4/131	34/18493	9.45851e-05	0.0390952	57805/7874/9529/6599	4
