# Supplementary material for: An Integrated Transcriptomic and Proteomic Analysis Identifies Significant Novel Pathways for Henoch-Schönlein Purpura Nephritis Progression
Source: Biomed Res Int. 2020 Jun 19;2020:2489175. doi: 10.1155/2020/2489175 (PMC7322592; doi:10.1155/2020/2489175)
Supplement: Supplementary Materials — .Supplementary Figure S1: images of renal pathological sections of HSPN patients. (A) Type 1. (B) Type 2. (C) Type 3. Supplementary Figure S2: PCA score plots for discriminating samples within the different groups. Supplementary Figure S3: correlation analysis of differentially expressed mRNAs and proteins between different types of HSPN. Supplementary Table S1: list of quantitated 24,493 mRNAs and 592 proteins. Supplementary Table S2: list of differentially expressed mRNAs between different HSPN types. Supplementary Table S3: list of differentially expressed proteins between different HSPN types. Supplementary Table S4: list of DEGs which were differentially expressed between HSPN type 1 and HSPN type 2 and HSPN type 2 and HSPN type 3. Supplementary Table S5: the significant pathways enriched by DEGs between different HSPN types. Supplementary Table S6: the correlation coefficients between differentially expressed genes in four pathways and clinical biochemical indicators. Supplementary Table S7: list of mRNAs and proteins selected for validation. Supplementary Table S8: the significant pathways enriched by downregulated DEGs between HSP and HSPN. Supplementary Table S9: list of differentially expressed mRNAs between HSP and HSPN. Supplementary Table S10: the differentially expressed genes in four pathways negative regulation of the JAK-STAT cascade and so on. [file 2489175.f1.zip › Supplementary Table S6.xlsx]

## Sheet: Sheet1
Supplementary Table S6 The correlation coefficients between differentially expressed genes in four pathways and clinical biochemical indicators
	IGA	CRP	C3	C4
BCL3-201	0.286448	0.0399995	0.130116	0.0729473
SOCS3-201	0.078795	0.274127	0.141885	0.192472
SOCS1-201	0.375486	0.627172	0.219345	0.247104
PPP2CA-203	0.0766246	0.238494	0.263938	0.051028
PPP2R1A-201	0.385575	0.171021	0.394797	0.613979
INPP5F-201	0.475316	0.582379	0.577893	0.522769
LARS-202	0.126531	0.361501	0.238676	0.0469172
UBR2-202	0.408983	0.528519	0.223226	0.130376
DGKQ-201	0.55833	0.707655	0.524681	0.368359
AKT1S1-205	0.404128	0.673791	0.407628	0.0307113
HDAC3-201	0.487994	0.478756	0.57426	0.46308
ATM-201	0.238195	0.0383189	0.0979121	0.0233533
ATM-215	0.171583	0.485384	0.308698	0.0221449
TMEM127-201	0.240105	0.553124	0.4205	0.0408587
SIRT1-201	0.598556	0.601542	0.389093	0.034968
AKT1-208	0.532177	0.252454	0.159789	0.201413
GOLPH3-201	0.116117	0.115603	0.304825	0.0759153
EIF4EBP2-201	0.0165926	0.154801	0.367325	0.13894
SIK1-201	0.00711766	0.367482	0.862975	0.183375
CLEC16A-203	0.115813	0.427298	0.202511	0.177718
MTOR-201	0.429691	0.27994	0.252487	0.26358
FNIP1-205	0.257607	0.54784	0.274042	0.0827427
RICTOR-202	0.243362	0.0754566	0.117236	0.0661455
GSK3A-202	0.675848	0.701799	0.411809	0.120482
TSC2-201	0.348248	0.177946	0.140673	0.183381
MAPKAPK5-206	0.0411566	0.149697	0.19416	0.0375819
YY1AP1-210	0.211223	0.456728	0.251034	0.135342
MTA2-201	0.438872	0.621492	0.3382	0.247432
SMARCC1-201	0.317951	0.321924	0.0997767	0.237851
MTA1-207	0.104783	0.414311	0.182884	0.204089
SMARCD2-203	0.524046	0.680385	0.446024	0.0432836
SMARCA5-201	0.0412522	0.136584	0.375237	0.145241
ANP32E-208	0.315305	0.585354	0.257612	0.206448
APPL1-201	0.103036	0.121518	0.32519	0.0786255
SMARCA2-209	0.354123	0.640969	0.281006	0.163882
SMARCD3-203	0.455762	0.512371	0.166571	0.153959
EP400-203	0.464912	0.664726	0.531104	0.379271
BICRAL-201	0.530705	0.327071	0.270036	0.464378
GRK5-202	0.144032	0.00658266	0.0287797	0.173015
PPP1CA-201	0.0826694	0.111679	0.113673	0.343211
ILK-202	0.293014	0.431552	0.211664	0.156178
UBC-205	0.324262	0.433643	0.056784	0.205723
KREMEN1-202	0.0443497	0.491907	0.304408	0.0143538
WWOX-214	0.409605	0.394175	0.192973	0.408804
