# Supplementary material for: An Integrated Transcriptomic and Proteomic Analysis Identifies Significant Novel Pathways for Henoch-Schönlein Purpura Nephritis Progression
Source: Biomed Res Int. 2020 Jun 19;2020:2489175. doi: 10.1155/2020/2489175 (PMC7322592; doi:10.1155/2020/2489175)
Supplement: Supplementary Materials — .Supplementary Figure S1: images of renal pathological sections of HSPN patients. (A) Type 1. (B) Type 2. (C) Type 3. Supplementary Figure S2: PCA score plots for discriminating samples within the different groups. Supplementary Figure S3: correlation analysis of differentially expressed mRNAs and proteins between different types of HSPN. Supplementary Table S1: list of quantitated 24,493 mRNAs and 592 proteins. Supplementary Table S2: list of differentially expressed mRNAs between different HSPN types. Supplementary Table S3: list of differentially expressed proteins between different HSPN types. Supplementary Table S4: list of DEGs which were differentially expressed between HSPN type 1 and HSPN type 2 and HSPN type 2 and HSPN type 3. Supplementary Table S5: the significant pathways enriched by DEGs between different HSPN types. Supplementary Table S6: the correlation coefficients between differentially expressed genes in four pathways and clinical biochemical indicators. Supplementary Table S7: list of mRNAs and proteins selected for validation. Supplementary Table S8: the significant pathways enriched by downregulated DEGs between HSP and HSPN. Supplementary Table S9: list of differentially expressed mRNAs between HSP and HSPN. Supplementary Table S10: the differentially expressed genes in four pathways negative regulation of the JAK-STAT cascade and so on. [file 2489175.f1.zip › Supplementary Table S8.xlsx]

## Sheet: Sheet1
Supplementary Table S8 The significant pathways enriched by up-regulated DEGs between HSP and HSPN
Category	ID	Description	GeneRatio	BgRatio	pvalue	FDR	geneID	Count
GOTERM_BP	GO:0051346	negative regulation of hydrolase activity	20/139	458/18493	2.34146e-10	6.61931e-07	4318/56882/7422/5743/2876/7980/718/1294/11153/10253/335/27329/3699/345/27344/6590/336/7077/341/710	20
GOTERM_BP	GO:0043062	extracellular structure organization	18/139	402/18493	1.34822e-09	1.90571e-06	4318/4314/4317/7251/4312/1292/4319/1294/1280/335/345/7412/337/336/1277/7077/341/4060	18
GOTERM_BP	GO:0033700	phospholipid efflux	5/139	12/18493	1.69434e-08	1.49458e-05	335/345/337/336/341	5
GOTERM_BP	GO:0030574	collagen catabolic process	7/139	41/18493	2.11472e-08	1.49458e-05	4318/4314/4317/4312/1508/4319/9902	7
GOTERM_BP	GO:0032963	collagen metabolic process	9/139	106/18493	1.04515e-07	5.18696e-05	4318/4314/4317/4312/1508/4319/55214/9902/1277	9
GOTERM_BP	GO:0034375	high-density lipoprotein particle remodeling	5/139	17/18493	1.28435e-07	5.18696e-05	335/345/337/336/341	5
GOTERM_BP	GO:0060192	negative regulation of lipase activity	5/139	17/18493	1.28435e-07	5.18696e-05	335/27329/345/336/341	5
GOTERM_BP	GO:0032496	response to lipopolysaccharide	14/139	324/18493	1.58656e-07	5.6065e-05	3576/2919/9261/728/7867/5743/1051/2921/4208/7056/29/6590/7412/4016	14
GOTERM_BP	GO:0001503	ossification	15/139	380/18493	1.80482e-07	5.66914e-05	4318/9636/1192/5743/6781/1051/4208/3488/9902/650/1280/3479/4256/1009/1277	15
GOTERM_BP	GO:0002237	response to molecule of bacterial origin	14/139	337/18493	2.56164e-07	7.24175e-05	3576/2919/9261/728/7867/5743/1051/2921/4208/7056/29/6590/7412/4016	14
GOTERM_BP	GO:0010951	negative regulation of endopeptidase activity	12/139	250/18493	4.18328e-07	0.00010751	4318/7422/5743/2876/7980/718/1294/3699/27344/6590/7077/710	12
GOTERM_BP	GO:0060191	regulation of lipase activity	8/139	95/18493	5.8338e-07	0.000133551	728/27/335/27329/345/337/336/341	8
GOTERM_BP	GO:0034378	chylomicron assembly	4/139	10/18493	6.19764e-07	0.000133551	335/345/337/336	4
GOTERM_BP	GO:0010466	negative regulation of peptidase activity	12/139	261/18493	6.61378e-07	0.000133551	4318/7422/5743/2876/7980/718/1294/3699/27344/6590/7077/710	12
GOTERM_BP	GO:0098742	cell-cell adhesion via plasma-membrane adhesion molecules	12/139	270/18493	9.46194e-07	0.000152066	25945/214/56147/56125/650/335/1000/1003/1004/1009/2195/7412	12
GOTERM_BP	GO:0046578	regulation of Ras protein signal transduction	11/139	222/18493	9.47766e-07	0.000152066	1785/56882/26030/23550/29/3084/10253/335/3479/345/7077	11
GOTERM_BP	GO:0010872	regulation of cholesterol esterification	4/139	11/18493	9.68232e-07	0.000152066	335/337/336/341	4
GOTERM_BP	GO:0034372	very-low-density lipoprotein particle remodeling	4/139	11/18493	9.68232e-07	0.000152066	335/345/337/336	4
GOTERM_BP	GO:0034370	triglyceride-rich lipoprotein particle remodeling	4/139	12/18493	1.44388e-06	0.000214834	335/345/337/336	4
GOTERM_BP	GO:0034368	protein-lipid complex remodeling	5/139	28/18493	1.90863e-06	0.000245259	335/345/337/336/341	5
GOTERM_BP	GO:0034369	plasma lipoprotein particle remodeling	5/139	28/18493	1.90863e-06	0.000245259	335/345/337/336/341	5
GOTERM_BP	GO:0034377	plasma lipoprotein particle assembly	5/139	28/18493	1.90863e-06	0.000245259	335/345/337/336/341	5
GOTERM_BP	GO:0034367	protein-containing complex remodeling	5/139	30/18493	2.73429e-06	0.000313785	335/345/337/336/341	5
GOTERM_BP	GO:0034433	steroid esterification	4/139	14/18493	2.88589e-06	0.000313785	335/337/336/341	4
GOTERM_BP	GO:0034434	sterol esterification	4/139	14/18493	2.88589e-06	0.000313785	335/337/336/341	4
GOTERM_BP	GO:0034435	cholesterol esterification	4/139	14/18493	2.88589e-06	0.000313785	335/337/336/341	4
GOTERM_BP	GO:0065005	protein-lipid complex assembly	5/139	32/18493	3.81745e-06	0.000395008	335/345/337/336/341	5
GOTERM_BP	GO:0018158	protein oxidation	4/139	15/18493	3.91236e-06	0.000395008	2876/335/4016/336	4
GOTERM_BP	GO:0042119	neutrophil activation	15/139	498/18493	5.25834e-06	0.000512597	3576/4318/2919/4317/290/728/51646/1650/1508/54472/29/718/2219/6590/7077	15
GOTERM_BP	GO:0051056	regulation of small GTPase mediated signal transduction	12/139	321/18493	5.67269e-06	0.000534556	1785/56882/26030/23550/29/80728/3084/10253/335/3479/345/7077	12
GOTERM_BP	GO:0032371	regulation of sterol transport	6/139	61/18493	6.39708e-06	0.000565142	20/335/345/337/336/341	6
GOTERM_BP	GO:0032374	regulation of cholesterol transport	6/139	61/18493	6.39708e-06	0.000565142	20/335/345/337/336/341	6
GOTERM_BP	GO:0046890	regulation of lipid biosynthetic process	9/139	183/18493	1.01519e-05	0.000869681	4802/5743/6713/718/650/335/345/337/341	9
GOTERM_BP	GO:0006641	triglyceride metabolic process	7/139	101/18493	1.11226e-05	0.000924808	2876/718/335/345/337/336/341	7
GOTERM_BP	GO:0030198	extracellular matrix organization	12/139	348/18493	1.27943e-05	0.00100335	4318/4314/4317/4312/1292/4319/1294/1280/7412/1277/7077/4060	12
GOTERM_BP	GO:0006959	humoral immune response	12/139	349/18493	1.31657e-05	0.00100335	3576/2919/728/2921/51279/4208/718/2219/3078/6590/3080/710	12
GOTERM_BP	GO:0008203	cholesterol metabolic process	8/139	144/18493	1.32644e-05	0.00100335	4802/6713/335/27329/337/336/341/319	8
GOTERM_BP	GO:0043691	reverse cholesterol transport	4/139	20/18493	1.34869e-05	0.00100335	335/345/337/336	4
GOTERM_BP	GO:0060350	endochondral bone morphogenesis	6/139	71/18493	1.55156e-05	0.00112468	6781/4208/1292/1294/1280/1277	6
GOTERM_BP	GO:0051004	regulation of lipoprotein lipase activity	4/139	21/18493	1.65633e-05	0.00114685	27329/345/337/341	4
GOTERM_BP	GO:1902652	secondary alcohol metabolic process	8/139	149/18493	1.70043e-05	0.00114685	4802/6713/335/27329/337/336/341/319	8
GOTERM_BP	GO:0045861	negative regulation of proteolysis	12/139	359/18493	1.74311e-05	0.00114685	4318/7422/5743/2876/7980/718/1294/3699/27344/6590/7077/710	12
GOTERM_BP	GO:0043312	neutrophil degranulation	14/139	485/18493	1.77369e-05	0.00114685	4318/2919/4317/290/728/51646/1650/1508/54472/29/718/2219/6590/7077	14
GOTERM_BP	GO:0031214	biomineral tissue development	8/139	150/18493	1.78498e-05	0.00114685	9636/5743/1051/4208/650/3479/4256/1277	8
GOTERM_BP	GO:0002283	neutrophil activation involved in immune response	14/139	488/18493	1.89918e-05	0.00118507	4318/2919/4317/290/728/51646/1650/1508/54472/29/718/2219/6590/7077	14
GOTERM_BP	GO:0050727	regulation of inflammatory response	13/139	425/18493	1.96464e-05	0.00118507	4318/4314/4317/728/5743/2876/29/718/335/1003/3078/3080/710	13
GOTERM_BP	GO:0022617	extracellular matrix disassembly	6/139	74/18493	1.97022e-05	0.00118507	4318/4314/4317/4312/4319/7077	6
GOTERM_BP	GO:0071827	plasma lipoprotein particle organization	5/139	45/18493	2.14139e-05	0.00126119	335/345/337/336/341	5
GOTERM_BP	GO:0060351	cartilage development involved in endochondral bone morphogenesis	5/139	46/18493	2.3881e-05	0.00137337	6781/1292/1294/1280/1277	5
GOTERM_BP	GO:0002446	neutrophil mediated immunity	14/139	499/18493	2.42903e-05	0.00137337	4318/2919/4317/290/728/51646/1650/1508/54472/29/718/2219/6590/7077	14
GOTERM_BP	GO:0051216	cartilage development	9/139	206/18493	2.6059e-05	0.00144449	6781/4208/1292/1294/650/1280/4256/1277/4060	9
GOTERM_BP	GO:0016339	calcium-dependent cell-cell adhesion via plasma membrane cell adhesion molecules	5/139	48/18493	2.94742e-05	0.00157214	56125/1000/1003/1004/1009	5
GOTERM_BP	GO:2000725	regulation of cardiac muscle cell differentiation	5/139	48/18493	2.94742e-05	0.00157214	4208/8324/3084/650/3479	5
GOTERM_BP	GO:0016125	sterol metabolic process	8/139	162/18493	3.108e-05	0.00161727	4802/6713/335/27329/337/336/341/319	8
GOTERM_BP	GO:0002526	acute inflammatory response	9/139	211/18493	3.14644e-05	0.00161727	728/5743/1051/718/3078/3080/7412/336/710	9
GOTERM_BP	GO:0019218	regulation of steroid metabolic process	7/139	119/18493	3.23824e-05	0.00161815	4802/6713/650/335/337/336/341	7
GOTERM_BP	GO:0071825	protein-lipid complex subunit organization	5/139	49/18493	3.26264e-05	0.00161815	335/345/337/336/341	5
GOTERM_BP	GO:0007156	homophilic cell adhesion via plasma membrane adhesion molecules	8/139	167/18493	3.86163e-05	0.00188221	25945/56147/56125/1000/1003/1004/1009/2195	8
GOTERM_BP	GO:0045778	positive regulation of ossification	6/139	84/18493	4.06541e-05	0.00194795	9636/1192/1051/4208/650/3479	6
GOTERM_BP	GO:0006639	acylglycerol metabolic process	7/139	124/18493	4.21813e-05	0.00198744	2876/718/335/345/337/336/341	7
GOTERM_BP	GO:0050994	regulation of lipid catabolic process	5/139	52/18493	4.36715e-05	0.00202392	27329/345/337/336/341	5
GOTERM_BP	GO:0006638	neutral lipid metabolic process	7/139	125/18493	4.44064e-05	0.00202479	2876/718/335/345/337/336/341	7
GOTERM_BP	GO:0001523	retinoid metabolic process	6/139	86/18493	4.64483e-05	0.00208375	6383/335/5950/345/337/336	6
GOTERM_BP	GO:0051146	striated muscle cell differentiation	10/139	277/18493	4.71736e-05	0.00208375	7422/2876/4208/71/3488/8324/3084/650/1000/3479	10
GOTERM_BP	GO:0045940	positive regulation of steroid metabolic process	4/139	29/18493	6.27328e-05	0.00268705	335/337/336/341	4
GOTERM_BP	GO:0060536	cartilage morphogenesis	4/139	29/18493	6.27328e-05	0.00268705	6781/4208/1292/1294	4
GOTERM_BP	GO:0006066	alcohol metabolic process	11/139	348/18493	6.54409e-05	0.00271839	4802/6713/650/335/3479/5950/27329/337/336/341/319	11
GOTERM_BP	GO:0050900	leukocyte migration	13/139	478/18493	6.59087e-05	0.00271839	3576/4318/2919/9123/728/6383/7422/2921/4312/29/388372/7412/1277	13
GOTERM_BP	GO:0016101	diterpenoid metabolic process	6/139	92/18493	6.78987e-05	0.00271839	6383/335/5950/345/337/336	6
GOTERM_BP	GO:0042632	cholesterol homeostasis	6/139	92/18493	6.78987e-05	0.00271839	20/335/27329/345/337/336	6
GOTERM_BP	GO:0033344	cholesterol efflux	5/139	57/18493	6.82721e-05	0.00271839	335/345/337/336/341	5
GOTERM_BP	GO:0055092	sterol homeostasis	6/139	93/18493	7.21372e-05	0.00283239	20/335/27329/345/337/336	6
GOTERM_BP	GO:0052548	regulation of endopeptidase activity	12/139	417/18493	7.45762e-05	0.00288804	4318/7422/5743/2876/7980/718/1294/3699/27344/6590/7077/710	12
GOTERM_BP	GO:0034332	adherens junction organization	7/139	139/18493	8.70879e-05	0.00329663	7422/25945/11228/1000/1003/1004/1009	7
GOTERM_BP	GO:0046503	glycerolipid catabolic process	5/139	60/18493	8.74592e-05	0.00329663	335/345/337/336/341	5
GOTERM_BP	GO:0031099	regeneration	8/139	188/18493	8.9007e-05	0.00331082	728/1051/2876/83481/8324/335/3479/336	8
GOTERM_BP	GO:0055024	regulation of cardiac muscle tissue development	6/139	97/18493	9.1251e-05	0.00335021	4208/8324/3084/650/3479/5950	6
GOTERM_BP	GO:0045669	positive regulation of osteoblast differentiation	5/139	61/18493	9.46969e-05	0.00343215	1192/1051/4208/650/3479	5
GOTERM_BP	GO:0030301	cholesterol transport	6/139	98/18493	9.66077e-05	0.00345709	20/335/345/337/336/341	6
GOTERM_BP	GO:0030278	regulation of ossification	8/139	193/18493	0.000106836	0.00377533	9636/1192/1051/4208/3488/650/3479/4256	8
GOTERM_BP	GO:1905207	regulation of cardiocyte differentiation	5/139	64/18493	0.000119196	0.00416008	4208/8324/3084/650/3479	5
GOTERM_BP	GO:0052547	regulation of peptidase activity	12/139	442/18493	0.000129064	0.00444957	4318/7422/5743/2876/7980/718/1294/3699/27344/6590/7077/710	12
GOTERM_BP	GO:0006721	terpenoid metabolic process	6/139	104/18493	0.000134232	0.00451754	6383/335/5950/345/337/336	6
GOTERM_BP	GO:0030282	bone mineralization	6/139	104/18493	0.000134232	0.00451754	9636/5743/4208/650/3479/4256	6
GOTERM_BP	GO:1901861	regulation of muscle tissue development	7/139	151/18493	0.00014611	0.00485945	4208/3488/8324/3084/650/3479/5950	7
GOTERM_BP	GO:1905952	regulation of lipid localization	7/139	152/18493	0.000152215	0.00500363	718/20/335/345/337/336/341	7
GOTERM_BP	GO:0015918	sterol transport	6/139	108/18493	0.000165179	0.00528875	20/335/345/337/336/341	6
GOTERM_BP	GO:0055090	acylglycerol homeostasis	4/139	37/18493	0.000166501	0.00528875	335/27329/345/337	4
GOTERM_BP	GO:0070328	triglyceride homeostasis	4/139	37/18493	0.000166501	0.00528875	335/27329/345/337	4
GOTERM_BP	GO:0061448	connective tissue development	9/139	263/18493	0.000170331	0.00530457	6781/4208/1292/1294/650/1280/4256/1277/4060	9
GOTERM_BP	GO:0019216	regulation of lipid metabolic process	11/139	388/18493	0.000170752	0.00530457	4802/5743/6713/718/650/335/27329/345/337/336/341	11
GOTERM_BP	GO:0030299	intestinal cholesterol absorption	3/139	15/18493	0.000176969	0.00537948	335/337/336	3
GOTERM_BP	GO:0034380	high-density lipoprotein particle assembly	3/139	15/18493	0.000176969	0.00537948	335/337/336	3
GOTERM_BP	GO:0060348	bone development	8/139	208/18493	0.000178889	0.00537998	6781/4208/1292/1294/650/1280/3479/1277	8
GOTERM_BP	GO:0010876	lipid localization	11/139	393/18493	0.000190778	0.00565077	3624/718/20/335/5950/27329/345/337/336/341/319	11
GOTERM_BP	GO:0060349	bone morphogenesis	6/139	111/18493	0.00019189	0.00565077	6781/4208/1292/1294/1280/1277	6
GOTERM_BP	GO:0002739	regulation of cytokine secretion involved in immune response	3/139	16/18493	0.000216611	0.00620051	3098/335/336	3
GOTERM_BP	GO:0098856	intestinal lipid absorption	3/139	16/18493	0.000216611	0.00620051	335/337/336	3
GOTERM_BP	GO:0001649	osteoblast differentiation	8/139	214/18493	0.000217138	0.00620051	1192/1051/4208/3488/9902/650/3479/1277	8
GOTERM_BP	GO:0043405	regulation of MAP kinase activity	10/139	335/18493	0.00022497	0.00627513	9261/728/7251/7867/7422/3084/10253/200734/650/3479	10
GOTERM_BP	GO:0046461	neutral lipid catabolic process	4/139	40/18493	0.000226411	0.00627513	335/345/337/336	4
GOTERM_BP	GO:0046464	acylglycerol catabolic process	4/139	40/18493	0.000226411	0.00627513	335/345/337/336	4
GOTERM_BP	GO:0035051	cardiocyte differentiation	7/139	163/18493	0.000234082	0.00642476	7422/4208/8324/3084/650/3479/7412	7
GOTERM_BP	GO:0015914	phospholipid transport	5/139	74/18493	0.000237152	0.00644643	335/345/337/336/341	5
GOTERM_BP	GO:0034384	high-density lipoprotein particle clearance	3/139	17/18493	0.000261583	0.00697638	335/345/336	3
GOTERM_BP	GO:0044241	lipid digestion	3/139	17/18493	0.000261583	0.00697638	335/337/336	3
GOTERM_BP	GO:0044331	cell-cell adhesion mediated by cadherin	4/139	42/18493	0.000274091	0.00724164	1000/1003/1004/1009	4
GOTERM_BP	GO:0000302	response to reactive oxygen species	8/139	224/18493	0.000295668	0.00773938	1785/4318/4314/5829/2876/6649/337/1277	8
GOTERM_BP	GO:0006956	complement activation	7/139	170/18493	0.000302482	0.00784511	728/51279/718/2219/3078/3080/710	7
GOTERM_BP	GO:0045667	regulation of osteoblast differentiation	6/139	121/18493	0.000306369	0.00787368	1192/1051/4208/3488/650/3479	6
GOTERM_BP	GO:0070482	response to oxygen levels	10/139	349/18493	0.000311748	0.00793973	4314/7422/5743/6781/4319/9777/650/6649/7412/1277	10
GOTERM_BP	GO:0032368	regulation of lipid transport	6/139	122/18493	0.00032025	0.00808345	20/335/345/337/336/341	6
GOTERM_BP	GO:0007157	heterophilic cell-cell adhesion via plasma membrane cell adhesion molecules	4/139	44/18493	0.000328582	0.00814825	25945/214/1000/7412	4
GOTERM_BP	GO:0070169	positive regulation of biomineral tissue development	4/139	44/18493	0.000328582	0.00814825	9636/1051/4208/650	4
GOTERM_BP	GO:0006720	isoprenoid metabolic process	6/139	123/18493	0.000334619	0.00820867	6383/335/5950/345/337/336	6
GOTERM_BP	GO:0050673	epithelial cell proliferation	11/139	420/18493	0.000336826	0.00820867	728/7422/1051/2876/4208/83481/3488/8324/650/335/3479	11
GOTERM_BP	GO:0001819	positive regulation of cytokine production	11/139	422/18493	0.000350635	0.00847218	9261/3098/4317/728/5743/1051/718/56666/2219/336/4060	11
GOTERM_BP	GO:0035987	endodermal cell differentiation	4/139	45/18493	0.000358549	0.00858999	4318/4317/3624/1294	4
GOTERM_BP	GO:0002374	cytokine secretion involved in immune response	3/139	19/18493	0.000368674	0.00861358	3098/335/336	3
GOTERM_BP	GO:0003422	growth plate cartilage morphogenesis	3/139	19/18493	0.000368674	0.00861358	6781/1292/1294	3
GOTERM_BP	GO:0006907	pinocytosis	3/139	19/18493	0.000368674	0.00861358	1785/9261/7867	3
GOTERM_BP	GO:0042157	lipoprotein metabolic process	6/139	127/18493	0.000397223	0.00920451	4836/335/345/337/336/341	6
GOTERM_BP	GO:0007265	Ras protein signal transduction	11/139	430/18493	0.000410742	0.00944039	1785/56882/26030/23550/29/3084/10253/335/3479/345/7077	11
GOTERM_BP	GO:0046697	decidualization	3/139	20/18493	0.000431355	0.00976502	5743/6781/1508	3
GOTERM_BP	GO:0055007	cardiac muscle cell differentiation	6/139	129/18493	0.000431775	0.00976502	7422/4208/8324/3084/650/3479	6
GOTERM_BP	GO:0070167	regulation of biomineral tissue development	5/139	86/18493	0.000477113	0.0107048	9636/1051/4208/650/4256	5
GOTERM_BP	GO:0002697	regulation of immune effector process	11/139	439/18493	0.00048849	0.0108737	3098/728/26146/29/718/335/5950/3078/3080/336/710	11
GOTERM_BP	GO:0071498	cellular response to fluid shear stress	3/139	21/18493	0.000500487	0.0110537	5743/4208/7980	3
GOTERM_BP	GO:0042692	muscle cell differentiation	10/139	373/18493	0.000525192	0.0115094	7422/2876/4208/71/3488/8324/3084/650/1000/3479	10
GOTERM_BP	GO:0001706	endoderm formation	4/139	50/18493	0.000538348	0.0116176	4318/4317/3624/1294	4
GOTERM_BP	GO:0042304	regulation of fatty acid biosynthetic process	4/139	50/18493	0.000538348	0.0116176	5743/345/337/341	4
GOTERM_BP	GO:0050995	negative regulation of lipid catabolic process	3/139	22/18493	0.000576333	0.0123431	345/336/341	3
GOTERM_BP	GO:0042180	cellular ketone metabolic process	7/139	190/18493	0.000589903	0.0125388	6999/5743/4836/650/345/337/341	7
GOTERM_BP	GO:0045834	positive regulation of lipid metabolic process	6/139	138/18493	0.000617294	0.0130231	5743/335/27329/337/336/341	6
GOTERM_BP	GO:0001666	response to hypoxia	9/139	314/18493	0.000622759	0.013041	4314/7422/5743/6781/4319/9777/650/6649/7412	9
GOTERM_BP	GO:0050996	positive regulation of lipid catabolic process	3/139	23/18493	0.00065915	0.0136716	27329/337/336	3
GOTERM_BP	GO:1903900	regulation of viral life cycle	6/139	140/18493	0.000665845	0.0136716	3576/9636/7251/23367/2219/6590	6
GOTERM_BP	GO:0072376	protein activation cascade	7/139	194/18493	0.000667379	0.0136716	728/51279/718/2219/3078/3080/710	7
GOTERM_BP	GO:0008202	steroid metabolic process	9/139	318/18493	0.000681553	0.0138615	4802/6713/650/335/27329/337/336/341/319	9
GOTERM_BP	GO:0035265	organ growth	7/139	195/18493	0.000687956	0.0138918	6781/4208/1292/1294/10253/3479/5950	7
GOTERM_BP	GO:0015850	organic hydroxy compound transport	8/139	255/18493	0.000697672	0.0139881	9123/20/335/5950/345/337/336/341	8
GOTERM_BP	GO:0043567	regulation of insulin-like growth factor receptor signaling pathway	3/139	24/18493	0.000749186	0.0149151	3488/650/3479	3
GOTERM_BP	GO:0055088	lipid homeostasis	6/139	144/18493	0.000771791	0.0152577	20/335/27329/345/337/336	6
GOTERM_BP	GO:0030100	regulation of endocytosis	8/139	260/18493	0.000791554	0.0154616	1785/7251/7422/29/718/27/345/341	8
GOTERM_BP	GO:0036293	response to decreased oxygen levels	9/139	325/18493	0.000795337	0.0154616	4314/7422/5743/6781/4319/9777/650/6649/7412	9
GOTERM_BP	GO:0045766	positive regulation of angiogenesis	7/139	200/18493	0.000798514	0.0154616	3576/728/7422/5743/718/1003/27329	7
GOTERM_BP	GO:0150077	regulation of neuroinflammatory response	3/139	25/18493	0.000846684	0.0162828	4318/4314/4317	3
GOTERM_BP	GO:0002673	regulation of acute inflammatory response	6/139	149/18493	0.000922034	0.0174939	728/5743/718/3078/3080/710	6
GOTERM_BP	GO:0016202	regulation of striated muscle tissue development	6/139	149/18493	0.000922034	0.0174939	4208/8324/3084/650/3479/5950	6
GOTERM_BP	GO:1901862	negative regulation of muscle tissue development	4/139	58/18493	0.000946822	0.0176384	3488/8324/650/5950	4
GOTERM_BP	GO:0001958	endochondral ossification	3/139	26/18493	0.000951879	0.0176384	4208/1280/1277	3
GOTERM_BP	GO:0036075	replacement ossification	3/139	26/18493	0.000951879	0.0176384	4208/1280/1277	3
GOTERM_BP	GO:0000187	activation of MAPK activity	6/139	150/18493	0.00095461	0.0176384	9261/728/7867/3084/650/3479	6
GOTERM_BP	GO:0030593	neutrophil chemotaxis	5/139	101/18493	0.000991982	0.01821	3576/2919/728/2921/388372	5
GOTERM_BP	GO:0048634	regulation of muscle organ development	6/139	153/18493	0.00105768	0.0190554	4208/8324/3084/650/3479/5950	6
GOTERM_BP	GO:0010575	positive regulation of vascular endothelial growth factor production	3/139	27/18493	0.001065	0.0190554	728/5743/718	3
GOTERM_BP	GO:0032372	negative regulation of sterol transport	3/139	27/18493	0.001065	0.0190554	345/336/341	3
GOTERM_BP	GO:0032375	negative regulation of cholesterol transport	3/139	27/18493	0.001065	0.0190554	345/336/341	3
GOTERM_BP	GO:0015748	organophosphate ester transport	5/139	103/18493	0.00108331	0.0192611	335/345/337/336/341	5
GOTERM_BP	GO:0097006	regulation of plasma lipoprotein particle levels	5/139	105/18493	0.00118073	0.020862	335/345/337/336/341	5
GOTERM_BP	GO:0010631	epithelial cell migration	9/139	346/18493	0.0012328	0.0216468	4318/5829/7422/5743/6781/2876/4208/83481/335	9
GOTERM_BP	GO:0043393	regulation of protein binding	7/139	217/18493	0.00128316	0.0222776	4318/4208/3084/650/3078/6590/3080	7
GOTERM_BP	GO:0030449	regulation of complement activation	5/139	107/18493	0.00128449	0.0222776	728/718/3078/3080/710	5
GOTERM_BP	GO:0090132	epithelium migration	9/139	349/18493	0.00130871	0.0225154	4318/5829/7422/5743/6781/2876/4208/83481/335	9
GOTERM_BP	GO:2000727	positive regulation of cardiac muscle cell differentiation	3/139	29/18493	0.00131591	0.0225154	4208/3084/3479	3
GOTERM_BP	GO:0071900	regulation of protein serine/threonine kinase activity	11/139	496/18493	0.00132209	0.0225154	9261/728/7251/7867/7422/5570/3084/10253/200734/650/3479	11
GOTERM_BP	GO:2000257	regulation of protein activation cascade	5/139	108/18493	0.00133883	0.0226638	728/718/3078/3080/710	5
GOTERM_BP	GO:0034614	cellular response to reactive oxygen species	6/139	162/18493	0.0014187	0.023873	1785/4318/4314/5829/6649/337	6
GOTERM_BP	GO:0042246	tissue regeneration	4/139	65/18493	0.00145092	0.0242708	2876/83481/8324/3479	4
GOTERM_BP	GO:0062012	regulation of small molecule metabolic process	9/139	355/18493	0.00147185	0.0243328	4802/5743/6713/3488/650/3479/345/337/341	9
GOTERM_BP	GO:0090130	tissue migration	9/139	355/18493	0.00147185	0.0243328	4318/5829/7422/5743/6781/2876/4208/83481/335	9
GOTERM_BP	GO:0034330	cell junction organization	8/139	287/18493	0.00148942	0.0244802	7422/71/25945/11228/1000/1003/1004/1009	8
GOTERM_BP	GO:0002698	negative regulation of immune effector process	5/139	111/18493	0.00151203	0.0247081	26146/29/335/336/710	5
GOTERM_BP	GO:0048738	cardiac muscle tissue development	7/139	224/18493	0.00153942	0.0250111	7422/4208/8324/3084/650/3479/5950	7
GOTERM_BP	GO:0019058	viral life cycle	8/139	289/18493	0.00155605	0.0251369	3576/9636/290/7251/1508/23367/2219/6590	8
GOTERM_BP	GO:1990266	neutrophil migration	5/139	112/18493	0.00157327	0.0252706	3576/2919/728/2921/388372	5
GOTERM_BP	GO:0006869	lipid transport	9/139	359/18493	0.00158943	0.0253859	3624/20/335/5950/345/337/336/341/319	9
GOTERM_BP	GO:0001893	maternal placenta development	3/139	31/18493	0.00160113	0.0254292	5743/6781/1508	3
GOTERM_BP	GO:0035924	cellular response to vascular endothelial growth factor stimulus	4/139	67/18493	0.00162371	0.0256437	9261/7422/10253/7412	4
GOTERM_BP	GO:0051153	regulation of striated muscle cell differentiation	5/139	113/18493	0.00163631	0.0256992	4208/8324/3084/650/3479	5
GOTERM_BP	GO:1904018	positive regulation of vasculature development	7/139	228/18493	0.00170281	0.0265958	3576/728/7422/5743/718/1003/27329	7
GOTERM_BP	GO:1904951	positive regulation of establishment of protein localization	10/139	437/18493	0.00173829	0.0270007	3098/4317/7251/5743/4836/56666/9777/3479/2219/5950	10
GOTERM_BP	GO:0010574	regulation of vascular endothelial growth factor production	3/139	32/18493	0.00175711	0.027144	728/5743/718	3
GOTERM_BP	GO:0030500	regulation of bone mineralization	4/139	69/18493	0.00181031	0.0278138	9636/4208/650/4256	4
GOTERM_BP	GO:0002062	chondrocyte differentiation	5/139	117/18493	0.00190718	0.0290601	4208/1292/1294/650/1280	5
GOTERM_BP	GO:0051098	regulation of binding	9/139	369/18493	0.00191668	0.0290601	4318/4317/4208/3084/650/3479/3078/6590/3080	9
GOTERM_BP	GO:0019433	triglyceride catabolic process	3/139	33/18493	0.00192226	0.0290601	335/345/337	3
GOTERM_BP	GO:0001704	formation of primary germ layer	5/139	118/18493	0.00197973	0.0297385	4318/4317/3624/1294/8324	5
GOTERM_BP	GO:0043900	regulation of multi-organism process	9/139	371/18493	0.00198817	0.0297385	3576/9636/7251/3624/26146/23367/3479/2219/6590	9
GOTERM_BP	GO:0034381	plasma lipoprotein particle clearance	4/139	71/18493	0.00201128	0.0299257	335/345/336/341	4
GOTERM_BP	GO:0048705	skeletal system morphogenesis	7/139	236/18493	0.00206987	0.0306363	6781/4208/1292/1294/1280/4256/1277	7
GOTERM_BP	GO:0010573	vascular endothelial growth factor production	3/139	34/18493	0.00209677	0.0307128	728/5743/718	3
GOTERM_BP	GO:0043403	skeletal muscle tissue regeneration	3/139	34/18493	0.00209677	0.0307128	2876/8324/3479	3
GOTERM_BP	GO:0071621	granulocyte chemotaxis	5/139	120/18493	0.00213086	0.0310512	3576/2919/728/2921/388372	5
GOTERM_BP	GO:0050792	regulation of viral process	6/139	177/18493	0.0022206	0.032193	3576/9636/7251/23367/2219/6590	6
GOTERM_BP	GO:0030501	positive regulation of bone mineralization	3/139	35/18493	0.00228082	0.0327304	9636/4208/650	3
GOTERM_BP	GO:0050892	intestinal absorption	3/139	35/18493	0.00228082	0.0327304	335/337/336	3
GOTERM_BP	GO:0007492	endoderm development	4/139	74/18493	0.00234089	0.0334227	4318/4317/3624/1294	4
GOTERM_BP	GO:0034447	very-low-density lipoprotein particle clearance	2/139	10/18493	0.00242631	0.0342959	345/341	2
GOTERM_BP	GO:0055091	phospholipid homeostasis	2/139	10/18493	0.00242631	0.0342959	335/27329	2
GOTERM_BP	GO:0006695	cholesterol biosynthetic process	4/139	75/18493	0.00245854	0.0344085	4802/6713/335/337	4
GOTERM_BP	GO:0003417	growth plate cartilage development	3/139	36/18493	0.00247459	0.0344085	6781/1292/1294	3
GOTERM_BP	GO:0034405	response to fluid shear stress	3/139	36/18493	0.00247459	0.0344085	5743/4208/7980	3
GOTERM_BP	GO:0007369	gastrulation	6/139	181/18493	0.00248296	0.0344085	4318/4317/3624/1294/8324/335	6
GOTERM_BP	GO:0010565	regulation of cellular ketone metabolic process	5/139	125/18493	0.00254535	0.0350225	5743/650/345/337/341	5
GOTERM_BP	GO:0051147	regulation of muscle cell differentiation	6/139	182/18493	0.00255204	0.0350225	4208/8324/3084/650/1000/3479	6
GOTERM_BP	GO:1902653	secondary alcohol biosynthetic process	4/139	76/18493	0.0025802	0.0352378	4802/6713/335/337	4
GOTERM_BP	GO:0002920	regulation of humoral immune response	5/139	126/18493	0.00263479	0.0358104	728/718/3078/3080/710	5
GOTERM_BP	GO:0009395	phospholipid catabolic process	3/139	37/18493	0.00267825	0.0358834	27329/336/341	3
GOTERM_BP	GO:0048009	insulin-like growth factor receptor signaling pathway	3/139	37/18493	0.00267825	0.0358834	3488/650/3479	3
GOTERM_BP	GO:0090207	regulation of triglyceride metabolic process	3/139	37/18493	0.00267825	0.0358834	718/345/337	3
GOTERM_BP	GO:0050707	regulation of cytokine secretion	6/139	184/18493	0.00269454	0.0359315	3098/4317/56666/335/2219/336	6
GOTERM_BP	GO:0002576	platelet degranulation	5/139	128/18493	0.00282049	0.0374344	7422/335/3479/3699/710	5
GOTERM_BP	GO:0031100	animal organ regeneration	4/139	78/18493	0.00283579	0.0374616	728/1051/335/336	4
GOTERM_BP	GO:0090596	sensory organ morphogenesis	7/139	251/18493	0.00292052	0.0380924	7422/29/25945/10253/1280/5950/2195	7
GOTERM_BP	GO:0010896	regulation of triglyceride catabolic process	2/139	11/18493	0.00295091	0.0380924	345/337	2
GOTERM_BP	GO:0034379	very-low-density lipoprotein particle assembly	2/139	11/18493	0.00295091	0.0380924	345/341	2
GOTERM_BP	GO:0035630	bone mineralization involved in bone maturation	2/139	11/18493	0.00295091	0.0380924	650/3479	2
GOTERM_BP	GO:0045919	positive regulation of cytolysis	2/139	11/18493	0.00295091	0.0380924	3078/3080	2
GOTERM_BP	GO:0046470	phosphatidylcholine metabolic process	4/139	79/18493	0.00296986	0.0381627	335/337/336/341	4
GOTERM_BP	GO:0071347	cellular response to interleukin-1	5/139	130/18493	0.00301549	0.038515	3576/8986/1051/54472/388372	5
GOTERM_BP	GO:0060537	muscle tissue development	9/139	395/18493	0.00302452	0.038515	7422/2876/4208/3488/8324/3084/650/3479/5950	9
GOTERM_BP	GO:0071902	positive regulation of protein serine/threonine kinase activity	8/139	323/18493	0.00309715	0.039263	9261/728/7867/7422/3084/10253/650/3479	8
GOTERM_BP	GO:0050777	negative regulation of immune response	5/139	131/18493	0.00311655	0.0393326	2876/29/335/336/710	5
GOTERM_BP	GO:0007565	female pregnancy	6/139	191/18493	0.00324068	0.0405574	4318/5743/6781/1508/7056/3488	6
GOTERM_BP	GO:0016126	sterol biosynthetic process	4/139	81/18493	0.00325088	0.0405574	4802/6713/335/337	4
GOTERM_BP	GO:0001818	negative regulation of cytokine production	7/139	256/18493	0.00325664	0.0405574	9636/4317/8986/3624/26146/335/336	7
GOTERM_BP	GO:0030225	macrophage differentiation	3/139	40/18493	0.00335015	0.0411777	4318/3624/7422	3
GOTERM_BP	GO:0044058	regulation of digestive system process	3/139	40/18493	0.00335015	0.0411777	335/337/336	3
GOTERM_BP	GO:0055026	negative regulation of cardiac muscle tissue development	3/139	40/18493	0.00335015	0.0411777	8324/650/5950	3
GOTERM_BP	GO:0051222	positive regulation of protein transport	9/139	402/18493	0.0033959	0.0414188	3098/4317/7251/5743/56666/9777/3479/2219/5950	9
GOTERM_BP	GO:0043406	positive regulation of MAP kinase activity	7/139	258/18493	0.00339907	0.0414188	9261/728/7867/7422/3084/650/3479	7
GOTERM_BP	GO:0097530	granulocyte migration	5/139	134/18493	0.00343442	0.0416699	3576/2919/728/2921/388372	5
GOTERM_BP	GO:0032102	negative regulation of response to external stimulus	8/139	329/18493	0.00346253	0.0418315	26146/2876/7056/29/83481/335/1003/710	8
GOTERM_BP	GO:0018206	peptidyl-methionine modification	2/139	12/18493	0.0035237	0.0423893	335/336	2
GOTERM_BP	GO:1905209	positive regulation of cardiocyte differentiation	3/139	41/18493	0.00359494	0.0430632	4208/3084/3479	3
GOTERM_BP	GO:0001101	response to acid chemical	8/139	332/18493	0.00365734	0.0434606	7422/5743/1051/8324/27/6602/5950/1277	8
GOTERM_BP	GO:0035023	regulation of Rho protein signal transduction	5/139	136/18493	0.00365887	0.0434606	56882/26030/29/335/345	5
GOTERM_BP	GO:0043154	negative regulation of cysteine-type endopeptidase activity involved in apoptotic process	4/139	84/18493	0.00370557	0.0438311	4318/7422/5743/2876	4
GOTERM_BP	GO:0046683	response to organophosphorus	5/139	137/18493	0.00377496	0.0444659	5743/6781/7056/3488/1277	5
GOTERM_BP	GO:0045429	positive regulation of nitric oxide biosynthetic process	3/139	42/18493	0.00385039	0.0449788	1785/4317/5743	3
GOTERM_BP	GO:1904407	positive regulation of nitric oxide metabolic process	3/139	42/18493	0.00385039	0.0449788	1785/4317/5743	3
GOTERM_BP	GO:0045833	negative regulation of lipid metabolic process	4/139	85/18493	0.00386624	0.0449788	650/345/336/341	4
GOTERM_BP	GO:0031348	negative regulation of defense response	6/139	199/18493	0.00396157	0.0457116	26146/2876/29/335/1003/710	6
GOTERM_BP	GO:0097529	myeloid leukocyte migration	6/139	199/18493	0.00396157	0.0457116	3576/2919/728/7422/2921/388372	6
GOTERM_BP	GO:0043542	endothelial cell migration	7/139	266/18493	0.00401687	0.0461215	5829/7422/5743/6781/2876/4208/335	7
GOTERM_BP	GO:0006029	proteoglycan metabolic process	4/139	86/18493	0.00403156	0.0461215	9953/650/1280/3479	4
GOTERM_BP	GO:0031589	cell-substrate adhesion	8/139	338/18493	0.00407241	0.0461215	1785/5829/7422/8324/335/27329/7412/1277	8
GOTERM_BP	GO:0003416	endochondral bone growth	3/139	43/18493	0.00411664	0.0461215	6781/1292/1294	3
GOTERM_BP	GO:0032369	negative regulation of lipid transport	3/139	43/18493	0.00411664	0.0461215	345/336/341	3
GOTERM_BP	GO:0001867	complement activation, lectin pathway	2/139	13/18493	0.00414392	0.0461215	2219/710	2
GOTERM_BP	GO:0032488	Cdc42 protein signal transduction	2/139	13/18493	0.00414392	0.0461215	335/345	2
GOTERM_BP	GO:0043568	positive regulation of insulin-like growth factor receptor signaling pathway	2/139	13/18493	0.00414392	0.0461215	3488/3479	2
GOTERM_BP	GO:0070208	protein heterotrimerization	2/139	13/18493	0.00414392	0.0461215	1292/1277	2
GOTERM_BP	GO:0070098	chemokine-mediated signaling pathway	4/139	87/18493	0.0042016	0.0462176	3576/2919/2921/388372	4
GOTERM_BP	GO:1904705	regulation of vascular smooth muscle cell proliferation	4/139	87/18493	0.0042016	0.0462176	4318/4208/3488/3479	4
GOTERM_BP	GO:1990874	vascular smooth muscle cell proliferation	4/139	87/18493	0.0042016	0.0462176	4318/4208/3488/3479	4
GOTERM_BP	GO:0051051	negative regulation of transport	10/139	495/18493	0.00424404	0.0463828	4318/3624/5743/6781/29/3084/335/345/336/341	10
GOTERM_BP	GO:0030879	mammary gland development	5/139	141/18493	0.00426584	0.0463828	7422/1051/2876/3488/3084	5
GOTERM_BP	GO:0045807	positive regulation of endocytosis	5/139	141/18493	0.00426584	0.0463828	1785/7251/7422/29/718	5
GOTERM_BP	GO:0043903	regulation of symbiosis, encompassing mutualism through parasitism	6/139	203/18493	0.00436362	0.0470424	3576/9636/7251/23367/2219/6590	6
GOTERM_BP	GO:0046434	organophosphate catabolic process	6/139	203/18493	0.00436362	0.0470424	3098/2876/3479/27329/336/341	6
GOTERM_BP	GO:0019217	regulation of fatty acid metabolic process	4/139	88/18493	0.00437642	0.0470424	5743/345/337/341	4
GOTERM_BP	GO:0048568	embryonic organ development	9/139	422/18493	0.00465781	0.0497848	3576/7422/1051/26146/4208/29/10253/1280/5950	9
GOTERM_BP	GO:0098868	bone growth	3/139	45/18493	0.00468205	0.0497848	6781/1292/1294	3
GOTERM_BP	GO:0071229	cellular response to acid chemical	6/139	206/18493	0.00468439	0.0497848	7422/1051/8324/27/6602/1277	6
GOTERM_MF	GO:0004857	enzyme inhibitor activity	17/143	371/17632	8.82842e-09	3.08112e-06	56882/7980/5570/718/1294/10253/200734/335/27329/3699/345/27344/6590/336/7077/341/710	17
GOTERM_MF	GO:0055102	lipase inhibitor activity	5/143	17/17632	1.8715e-07	3.26577e-05	335/27329/345/336/341	5
GOTERM_MF	GO:0015485	cholesterol binding	5/143	44/17632	2.7542e-05	0.00190965	335/345/337/336/319	5
GOTERM_MF	GO:0048018	receptor ligand activity	14/143	478/17632	3.49813e-05	0.00190965	3576/2919/3624/7422/6781/2921/388372/3084/650/347148/335/3479/27329/83729	14
GOTERM_MF	GO:0004252	serine-type endopeptidase activity	10/143	250/17632	3.76242e-05	0.00190965	4318/4314/4317/4312/51279/1508/4319/718/2219/3026	10
GOTERM_MF	GO:0005201	extracellular matrix structural constituent	8/143	155/17632	3.88061e-05	0.00190965	1292/7980/1294/1280/4256/10216/1277/4060	8
GOTERM_MF	GO:0050839	cell adhesion molecule binding	14/143	486/17632	4.1894e-05	0.00190965	1192/5829/25945/23367/3084/1000/1003/3479/27329/1004/1009/7412/7077/8839	14
GOTERM_MF	GO:0043178	alcohol binding	6/143	79/17632	4.37741e-05	0.00190965	335/5950/345/337/336/319	6
GOTERM_MF	GO:0032934	sterol binding	5/143	50/17632	5.16763e-05	0.00200389	335/345/337/336/319	5
GOTERM_MF	GO:0008083	growth factor activity	8/143	166/17632	6.3104e-05	0.00211258	2919/3624/7422/3084/650/3479/27329/83729	8
GOTERM_MF	GO:0005178	integrin binding	7/143	126/17632	7.52822e-05	0.00211258	5829/3084/3479/27329/7412/7077/8839	7
GOTERM_MF	GO:0005125	cytokine activity	9/143	219/17632	7.54865e-05	0.00211258	3576/2919/3624/7422/2921/388372/3084/650/83729	9
GOTERM_MF	GO:0008236	serine-type peptidase activity	10/143	273/17632	7.86922e-05	0.00211258	4318/4314/4317/4312/51279/1508/4319/718/2219/3026	10
GOTERM_MF	GO:0017171	serine hydrolase activity	10/143	277/17632	8.87667e-05	0.00212618	4318/4314/4317/4312/51279/1508/4319/718/2219/3026	10
GOTERM_MF	GO:0004866	endopeptidase inhibitor activity	8/143	175/17632	9.13833e-05	0.00212618	7980/718/1294/3699/27344/6590/7077/710	8
GOTERM_MF	GO:0005126	cytokine receptor binding	10/143	281/17632	9.99157e-05	0.00217941	3576/2919/3624/7422/2921/54472/388372/200734/650/83729	10
GOTERM_MF	GO:0030414	peptidase inhibitor activity	8/143	182/17632	0.000120025	0.00226098	7980/718/1294/3699/27344/6590/7077/710	8
GOTERM_MF	GO:0061135	endopeptidase regulator activity	8/143	182/17632	0.000120025	0.00226098	7980/718/1294/3699/27344/6590/7077/710	8
GOTERM_MF	GO:0004867	serine-type endopeptidase inhibitor activity	6/143	95/17632	0.000123091	0.00226098	7980/1294/3699/27344/6590/710	6
GOTERM_MF	GO:0030020	extracellular matrix structural constituent conferring tensile strength	4/143	37/17632	0.000222527	0.0038831	1292/1294/1280/1277	4
GOTERM_MF	GO:0001664	G protein-coupled receptor binding	9/143	274/17632	0.000403112	0.00669935	3576/1785/2919/2921/718/388372/8324/347148/2219	9
GOTERM_MF	GO:0061134	peptidase regulator activity	8/143	220/17632	0.000434692	0.0068958	7980/718/1294/3699/27344/6590/7077/710	8
GOTERM_MF	GO:0017127	cholesterol transporter activity	3/143	19/17632	0.00046019	0.00698288	335/337/336	3
GOTERM_MF	GO:0008013	beta-catenin binding	5/143	82/17632	0.000540744	0.00786332	5829/9739/83439/1000/1003	5
GOTERM_MF	GO:0008009	chemokine activity	4/143	49/17632	0.000662113	0.0092431	3576/2919/2921/388372	4
GOTERM_MF	GO:0005496	steroid binding	5/143	89/17632	0.0007862	0.0105532	335/345/337/336/319	5
GOTERM_MF	GO:0031210	phosphatidylcholine binding	3/143	26/17632	0.00118454	0.0142553	337/336/341	3
GOTERM_MF	GO:0050997	quaternary ammonium group binding	3/143	26/17632	0.00118454	0.0142553	337/336/341	3
GOTERM_MF	GO:0070325	lipoprotein particle receptor binding	3/143	26/17632	0.00118454	0.0142553	335/345/336	3
GOTERM_MF	GO:0005319	lipid transporter activity	6/143	146/17632	0.00122582	0.0142604	20/335/5950/337/336/319	6
GOTERM_MF	GO:0005507	copper ion binding	4/143	60/17632	0.00142252	0.0160149	144811/6649/4016/337	4
GOTERM_MF	GO:0042379	chemokine receptor binding	4/143	66/17632	0.00202518	0.0220871	3576/2919/2921/388372	4
GOTERM_MF	GO:0005518	collagen binding	4/143	67/17632	0.00214037	0.0226361	4318/1508/9902/4060	4
GOTERM_MF	GO:0004222	metalloendopeptidase activity	5/143	113/17632	0.00227741	0.0231198	4318/4314/4317/4312/4319	5
GOTERM_MF	GO:0015248	sterol transporter activity	3/143	33/17632	0.00238485	0.0231198	335/337/336	3
GOTERM_MF	GO:0030291	protein serine/threonine kinase inhibitor activity	3/143	33/17632	0.00238485	0.0231198	5570/10253/200734	3
GOTERM_MF	GO:0005179	hormone activity	5/143	121/17632	0.00306365	0.0288977	3624/6781/347148/3479/83729	5
GOTERM_MF	GO:0008035	high-density lipoprotein particle binding	2/143	11/17632	0.00342425	0.0298766	335/336	2
GOTERM_MF	GO:0009931	calcium-dependent protein serine/threonine kinase activity	2/143	11/17632	0.00342425	0.0298766	9261/7867	2
GOTERM_MF	GO:0048407	platelet-derived growth factor binding	2/143	11/17632	0.00342425	0.0298766	1280/1277	2
GOTERM_MF	GO:0004859	phospholipase inhibitor activity	2/143	12/17632	0.00408731	0.0339636	27329/341	2
GOTERM_MF	GO:0010857	calcium-dependent protein kinase activity	2/143	12/17632	0.00408731	0.0339636	9261/7867	2
GOTERM_MF	GO:0008237	metallopeptidase activity	6/143	189/17632	0.00445463	0.036155	4318/4314/4317/290/4312/4319	6
GOTERM_MF	GO:0016209	antioxidant activity	4/143	86/17632	0.00526881	0.0417912	5743/2876/6649/337	4
GOTERM_CC	GO:0031012	extracellular matrix	28/142	490/19659	1.49426e-17	4.12416e-15	4318/4314/4317/6383/7422/4312/1508/1292/4319/7980/1294/55214/1280/335/1000/4256/2219/6649/345/6590/4016/10216/337/1277/7077/8839/710/4060	28
GOTERM_CC	GO:0062023	collagen-containing extracellular matrix	22/142	332/19659	2.90747e-15	4.01231e-13	4318/4317/6383/1508/1292/1294/55214/1280/335/1000/4256/2219/6649/345/6590/4016/10216/337/1277/7077/710/4060	22
GOTERM_CC	GO:0042627	chylomicron	5/142	13/19659	2.25056e-08	1.80132e-06	335/345/337/336/341	5
GOTERM_CC	GO:0034364	high-density lipoprotein particle	6/142	26/19659	2.6106e-08	1.80132e-06	335/345/337/336/341/319	6
GOTERM_CC	GO:0005788	endoplasmic reticulum lumen	14/142	301/19659	3.98603e-08	2.20029e-06	6383/5743/1292/718/3488/1294/55214/1280/335/1000/337/336/4924/1277	14
GOTERM_CC	GO:0034361	very-low-density lipoprotein particle	5/142	20/19659	2.60297e-07	8.93969e-06	335/345/337/336/341	5
GOTERM_CC	GO:0034385	triglyceride-rich plasma lipoprotein particle	5/142	20/19659	2.60297e-07	8.93969e-06	335/345/337/336/341	5
GOTERM_CC	GO:0034358	plasma lipoprotein particle	6/142	38/19659	2.91512e-07	8.93969e-06	335/345/337/336/341/319	6
GOTERM_CC	GO:1990777	lipoprotein particle	6/142	38/19659	2.91512e-07	8.93969e-06	335/345/337/336/341/319	6
GOTERM_CC	GO:0032994	protein-lipid complex	6/142	40/19659	4.00529e-07	1.10546e-05	335/345/337/336/341/319	6
GOTERM_CC	GO:0034774	secretory granule lumen	12/142	321/19659	3.82774e-06	9.60414e-05	2919/4317/7422/54472/718/335/3479/2219/3699/6590/7077/710	12
GOTERM_CC	GO:0060205	cytoplasmic vesicle lumen	12/142	338/19659	6.47411e-06	0.000141623	2919/4317/7422/54472/718/335/3479/2219/3699/6590/7077/710	12
GOTERM_CC	GO:0031983	vesicle lumen	12/142	339/19659	6.67064e-06	0.000141623	2919/4317/7422/54472/718/335/3479/2219/3699/6590/7077/710	12
GOTERM_CC	GO:0098644	complex of collagen trimers	4/142	19/19659	9.29559e-06	0.000183256	1294/1280/1277/4060	4
GOTERM_CC	GO:0072562	blood microparticle	8/142	147/19659	1.16404e-05	0.000214182	1192/71/718/335/3078/337/336/710	8
GOTERM_CC	GO:0005581	collagen trimer	6/142	87/19659	3.98949e-05	0.000688187	1292/1294/1280/2219/1277/4060	6
GOTERM_CC	GO:1904724	tertiary granule lumen	5/142	55/19659	4.76714e-05	0.000773959	4318/2919/4317/51646/7077	5
GOTERM_CC	GO:0016342	catenin complex	4/142	29/19659	5.38526e-05	0.000805239	1000/1003/1004/1009	4
GOTERM_CC	GO:0005583	fibrillar collagen trimer	3/142	11/19659	5.83507e-05	0.000805239	1280/1277/4060	3
GOTERM_CC	GO:0098643	banded collagen fibril	3/142	11/19659	5.83507e-05	0.000805239	1280/1277/4060	3
GOTERM_CC	GO:0035580	specific granule lumen	5/142	62/19659	8.51562e-05	0.0011192	2919/4317/54472/6590/7077	5
GOTERM_CC	GO:0005769	early endosome	10/142	341/19659	0.000189838	0.0023816	7251/9559/9777/335/27329/345/7412/337/336/4924	10
GOTERM_CC	GO:0044420	extracellular matrix component	4/142	49/19659	0.000429554	0.00515465	1294/1280/1277/4060	4
GOTERM_CC	GO:0005913	cell-cell adherens junction	5/142	110/19659	0.00122139	0.014046	25945/1000/1003/1004/1009	5
GOTERM_CC	GO:1904813	ficolin-1-rich granule lumen	5/142	124/19659	0.00207346	0.022891	4318/51646/1508/2219/7077	5
GOTERM_CC	GO:0034362	low-density lipoprotein particle	2/142	14/19659	0.0044537	0.0456001	335/319	2
GOTERM_CC	GO:0005604	basement membrane	4/142	92/19659	0.00446088	0.0456001	1294/55214/1280/4016	4
GOTERM_CC	GO:0019898	extrinsic component of membrane	7/142	287/19659	0.00490181	0.0483178	4836/1000/1003/2219/1004/1009/4924	7
KEGG_PATHWAY	hsa04370	VEGF signaling pathway	5/78	59/7839	0.000281995	0.00919302	9261/5829/7867/7422/5743	5
KEGG_PATHWAY	hsa04510	Focal adhesion	7/78	199/7839	0.00352128	0.0409977	5829/7422/71/1292/1280/3479/1277	7
KEGG_PATHWAY	hsa04514	Cell adhesion molecules (CAMs)	6/78	144/7839	0.00300256	0.0387469	6383/25945/214/1000/1003/7412	6
KEGG_PATHWAY	hsa04657	IL-17 signaling pathway	8/78	93/7839	3.43865e-06	0.0005605	3576/4318/2919/4314/5743/1051/2921/4312	8
KEGG_PATHWAY	hsa04668	TNF signaling pathway	8/78	110/7839	1.20782e-05	0.000656249	4318/2919/4314/8986/5743/1051/2921/7412	8
KEGG_PATHWAY	hsa04933	AGE-RAGE signaling pathway in diabetic complications	5/78	100/7839	0.00309025	0.0387469	3576/7422/7056/7412/1277	5
KEGG_PATHWAY	hsa04979	Cholesterol metabolism	6/78	50/7839	8.96323e-06	0.000656249	335/27329/345/337/336/341	6
KEGG_PATHWAY	hsa05132	Salmonella infection	5/78	86/7839	0.00159226	0.0324422	3576/2919/2921/71/388372	5
KEGG_PATHWAY	hsa05134	Legionellosis	4/78	55/7839	0.0021063	0.0343328	3576/2919/2921/718	4
KEGG_PATHWAY	hsa05167	Kaposi sarcoma-associated herpesvirus infection	7/78	186/7839	0.00241376	0.0357675	3576/2919/9261/7422/5743/2921/718	7
KEGG_PATHWAY	hsa05205	Proteoglycans in cancer	8/78	201/7839	0.000818465	0.0190585	4318/5829/6383/7422/71/8324/3479/4060	8
KEGG_PATHWAY	hsa05219	Bladder cancer	4/78	41/7839	0.000694765	0.0188744	3576/4318/7422/4312	4
KEGG_PATHWAY	hsa05323	Rheumatoid arthritis	5/78	91/7839	0.00204579	0.0343328	3576/2919/4314/7422/4312	5
KEGG_PATHWAY	hsa05418	Fluid shear stress and atherosclerosis	8/78	139/7839	6.58422e-05	0.00268307	4318/6383/7422/4208/71/7056/1003/7412	8

## Sheet: Sheet2
Supplementary Table S8 The significant pathways enriched by down-regulated DEGs between HSP and HSPN
Category	ID	Description	GeneRatio	BgRatio	pvalue	FDR	geneID	Count
GOTERM_BP	GO:0006413	translational initiation	72/1957	194/18493	8.91839e-23	5.16999e-19	6207/6156/6122/6135/6222/6235/10289/6203/6136/1982/6189/51247/6155/6164/10209/6152/6169/6141/6165/6132/55024/6188/6209/6218/6224/8665/27102/6228/6161/6147/6154/4869/7311/6201/6175/6146/6205/1968/26986/51386/8672/9349/1979/8440/1983/9045/1974/8562/8872/8663/9669/8669/6208/6352/6059/5936/6125/22927/56339/1653/9451/7175/10987/440275/6134/57409/4686/27335/27161/1977/6159/1967	72
GOTERM_BP	GO:0006401	RNA catabolic process	95/1957	340/18493	2.01647e-19	5.84475e-16	6207/7812/6156/7534/6122/4904/6135/6222/6235/6203/8531/6136/10643/6189/6155/6164/6152/6169/6141/6165/6132/6188/6209/6218/6224/7529/6228/6161/6147/6154/10140/4869/7311/6201/9261/6175/51013/6146/6205/26986/3184/3312/5578/219988/3183/9349/9337/9045/25904/1869/342618/9652/23112/27258/10128/9939/472/6208/22803/27257/10236/6125/197135/26019/56339/29883/80349/6039/51594/6050/23369/170506/162989/7514/801…	95
GOTERM_BP	GO:0006402	mRNA catabolic process	88/1957	307/18493	7.34642e-19	1.12065e-15	6207/7812/6156/7534/6122/4904/6135/6222/6235/6203/8531/6136/10643/6189/6155/6164/6152/6169/6141/6165/6132/6188/6209/6218/6224/7529/6228/6161/6147/6154/10140/4869/7311/6201/9261/6175/51013/6146/6205/26986/3184/3312/5578/219988/3183/9349/9337/9045/25904/1869/342618/9652/23112/27258/9939/472/6208/27257/10236/6125/197135/26019/56339/29883/80349/51594/6050/23369/170506/7514/80153/114609/4848/6134/1994…	88
GOTERM_BP	GO:0002576	platelet degranulation	52/1957	128/18493	7.73261e-19	1.12065e-15	2316/7277/8407/87/1191/7414/928/2039/6403/6678/3690/5154/2162/5660/259215/351/5627/3674/6813/7057/10257/23052/6647/5023/51706/1950/94121/801/6850/967/83706/7076/1521/5874/948/9948/5473/10916/10490/22927/3920/5054/7424/5196/5341/7450/7114/10184/51097/7094/2621/2157	52
GOTERM_BP	GO:0007599	hemostasis	92/1957	339/18493	6.13522e-18	6.3017e-15	2316/3048/7534/71/51266/3047/2821/7414/928/2039/6403/4778/2782/239/1192/3690/5154/2162/60/340205/64805/5627/3674/3611/80739/998/2534/7057/2815/2814/708/5023/2149/30845/5575/5573/6915/10398/6850/196527/83706/2811/5578/5577/10362/51206/3708/829/948/9927/375033/8357/5912/1608/23028/5291/9060/4352/6714/2776/5054/9158/84959/5873/5196/5341/7450/5592/3020/5594/10855/5595/8526/959/10603/8527/3660/10019/1…	92
GOTERM_BP	GO:0007596	blood coagulation	91/1957	334/18493	7.06572e-18	6.3017e-15	2316/3048/7534/71/51266/3047/7414/928/2039/6403/4778/2782/239/1192/3690/5154/2162/60/340205/64805/5627/3674/3611/80739/998/2534/7057/2815/2814/708/5023/2149/30845/5575/5573/6915/10398/6850/196527/83706/2811/5578/5577/10362/51206/3708/829/948/9927/375033/8357/5912/1608/23028/5291/9060/4352/6714/2776/5054/9158/84959/5873/5196/5341/7450/5592/3020/5594/10855/5595/8526/959/10603/8527/3660/10019/1465/7…	91
GOTERM_BP	GO:0030168	platelet activation	56/1957	152/18493	7.60944e-18	6.3017e-15	2316/7534/71/51266/7414/928/2039/6403/2782/239/1192/3690/5154/60/340205/64805/3674/3611/80739/2534/2815/2814/5023/2149/10398/6850/83706/2811/5578/51206/3708/375033/5912/1608/5291/4352/6714/2776/9158/84959/5196/5341/7450/5592/5594/5595/8526/959/8527/1465/7094/7006/10672/2147/2621/2157	56
GOTERM_BP	GO:0050817	coagulation	91/1957	340/18493	2.45475e-17	1.77877e-14	2316/3048/7534/71/51266/3047/7414/928/2039/6403/4778/2782/239/1192/3690/5154/2162/60/340205/64805/5627/3674/3611/80739/998/2534/7057/2815/2814/708/5023/2149/30845/5575/5573/6915/10398/6850/196527/83706/2811/5578/5577/10362/51206/3708/829/948/9927/375033/8357/5912/1608/23028/5291/9060/4352/6714/2776/5054/9158/84959/5873/5196/5341/7450/5592/3020/5594/10855/5595/8526/959/10603/8527/3660/10019/1465/7…	91
GOTERM_BP	GO:0000956	nuclear-transcribed mRNA catabolic process	62/1957	207/18493	1.19578e-14	7.70213e-12	6207/7812/6156/6122/6135/6222/6235/6203/6136/6189/6155/6164/6152/6169/6141/6165/6132/6188/6209/6218/6224/6228/6161/6147/6154/10140/7311/6201/6175/51013/6146/6205/26986/219988/9349/9337/9045/25904/9652/23112/27258/9939/472/6208/27257/6125/197135/26019/29883/80349/51594/170506/80153/4848/6134/4686/27161/6159/1655/9887/677/53918	62
GOTERM_BP	GO:0006605	protein targeting	99/1957	424/18493	1.64247e-14	9.42825e-12	6207/6156/7534/6122/1191/6135/6222/6235/2039/6203/6136/6189/6155/6164/2040/6152/6169/6141/54741/6165/6132/6188/6209/6218/56288/2664/6224/2534/1384/706/7529/6228/6161/6147/6154/54469/60559/55294/51024/7311/6201/6175/23471/25793/6146/6205/665/3312/340481/9349/7095/6845/130617/8031/9045/11261/9927/23204/8239/9520/401505/6208/439/8443/58480/10490/6125/51762/3920/6727/22885/5873/84938/51125/9789/55146…	99
GOTERM_BP	GO:0006612	protein targeting to membrane	60/1957	198/18493	1.78904e-14	9.42825e-12	6207/6156/6122/6135/6222/6235/2039/6203/6136/6189/6155/6164/2040/6152/6169/6141/6165/6132/6188/6209/6218/56288/2664/6224/2534/6228/6161/6147/6154/51024/7311/6201/6175/23471/6146/6205/340481/9349/7095/6845/130617/9045/11261/23204/6208/439/6125/51762/6727/84938/51125/55146/6745/6134/84885/51201/1121/6159/8504/51304	60
GOTERM_BP	GO:0002446	neutrophil mediated immunity	110/1957	499/18493	3.6422e-14	1.75948e-11	2495/51646/58485/2821/7414/203068/5478/57153/10857/55004/8655/823/10383/2040/5660/51411/5315/5476/968/3615/387/3934/258010/6515/5908/6813/326624/54918/26578/9588/51071/5023/2683/5683/1727/427/4893/4048/1315/961/2760/6850/196527/967/5834/2934/11031/64114/10577/9861/3312/6283/6845/2665/948/2717/10890/5049/5269/10694/353/9535/5795/9948/10092/4718/64333/5719/5686/5473/4790/23406/3837/51552/5912/54472…	110
GOTERM_BP	GO:0043312	neutrophil degranulation	107/1957	485/18493	7.76561e-14	3.46287e-11	2495/51646/58485/2821/7414/203068/5478/57153/10857/55004/8655/823/10383/2040/5660/51411/5315/5476/968/3615/387/3934/258010/6515/5908/6813/326624/54918/26578/9588/51071/5023/2683/5683/1727/427/4893/4048/1315/961/2760/6850/196527/967/5834/2934/11031/64114/10577/9861/3312/6283/6845/2665/948/2717/10890/5049/5269/10694/353/9535/5795/10092/4718/64333/5719/5686/5473/4790/23406/3837/51552/5912/54472/5583…	107
GOTERM_BP	GO:0006613	cotranslational protein targeting to membrane	41/1957	109/18493	8.52019e-14	3.52797e-11	6207/6156/6122/6135/6222/6235/6203/6136/6189/6155/6164/6152/6169/6141/6165/6132/6188/6209/6218/6224/6228/6161/6147/6154/7311/6201/6175/23471/6146/6205/9349/7095/130617/9045/23204/6208/6125/6727/6745/6134/6159	41
GOTERM_BP	GO:0002283	neutrophil activation involved in immune response	107/1957	488/18493	1.18708e-13	4.58765e-11	2495/51646/58485/2821/7414/203068/5478/57153/10857/55004/8655/823/10383/2040/5660/51411/5315/5476/968/3615/387/3934/258010/6515/5908/6813/326624/54918/26578/9588/51071/5023/2683/5683/1727/427/4893/4048/1315/961/2760/6850/196527/967/5834/2934/11031/64114/10577/9861/3312/6283/6845/2665/948/2717/10890/5049/5269/10694/353/9535/5795/10092/4718/64333/5719/5686/5473/4790/23406/3837/51552/5912/54472/5583…	107
GOTERM_BP	GO:0042119	neutrophil activation	108/1957	498/18493	1.936e-13	6.89158e-11	2495/51646/58485/2821/7414/203068/5478/57153/10857/55004/8655/823/10383/2040/5660/51411/5315/5476/968/3615/387/3934/258010/6515/5908/6813/326624/54918/26578/9588/51071/5023/2683/5683/1727/427/4893/4048/1315/961/2760/6850/196527/967/5834/2934/11031/64114/10577/9861/3312/6283/6845/2665/948/2717/10890/5049/5269/10694/353/9535/5795/10092/4718/64333/5719/5686/5473/4790/23406/3837/51552/5912/6352/54472…	108
GOTERM_BP	GO:0090150	establishment of protein localization to membrane	79/1957	317/18493	2.08244e-13	6.89158e-11	6207/6156/7534/6122/6135/6222/6235/2039/6203/6136/6189/6155/6164/2040/6152/6169/8766/6141/6165/6132/6188/6209/6218/56288/2664/6224/2534/7529/6228/6161/6147/6154/1445/51024/7311/6201/10971/6175/23471/801/6146/6205/163882/11031/7485/340481/8266/9349/7095/6845/130617/9045/11261/1869/10890/7917/23204/6208/439/6125/51762/4905/6727/84938/51125/55146/6745/6134/84885/51201/841/3308/1121/26517/6159/8504/5…	79
GOTERM_BP	GO:0072599	establishment of protein localization to endoplasmic reticulum	43/1957	121/18493	2.13987e-13	6.89158e-11	6207/6156/6122/6135/6222/6235/6203/6136/6189/6155/6164/6152/6169/6141/6165/6132/6188/6209/6218/6224/6228/6161/6147/6154/60559/7311/6201/6175/23471/6146/6205/9349/7095/130617/9045/10890/6208/439/6125/6727/9789/6134/6159	43
GOTERM_BP	GO:0045047	protein targeting to ER	42/1957	117/18493	2.73843e-13	8.2202e-11	6207/6156/6122/6135/6222/6235/6203/6136/6189/6155/6164/6152/6169/6141/6165/6132/6188/6209/6218/6224/6228/6161/6147/6154/60559/7311/6201/6175/23471/6146/6205/9349/7095/130617/9045/6208/439/6125/6727/9789/6134/6159	42
GOTERM_BP	GO:0070527	platelet aggregation	28/1957	57/18493	2.83602e-13	8.2202e-11	2316/71/7414/928/2039/239/1192/3690/60/64805/3674/3611/10398/6850/83706/2811/5578/375033/5912/5291/4352/9158/84959/5341/5592/1465/7094/2621	28
GOTERM_BP	GO:0019882	antigen processing and presentation	52/1957	175/18493	2.30269e-12	6.35652e-10	3796/1173/8655/3123/10134/1211/5867/972/7057/3108/140735/5720/6892/3122/3118/10981/22920/829/948/51164/10890/1213/10540/50856/51128/162/1785/3117/8517/3109/5641/51762/3119/4012/163/5873/8773/55016/3133/7879/911/5869/3832/10484/10053/912/821/8905/3134/9363/10427/56992	52
GOTERM_BP	GO:0006614	SRP-dependent cotranslational protein targeting to membrane	38/1957	105/18493	2.76877e-12	7.29572e-10	6207/6156/6122/6135/6222/6235/6203/6136/6189/6155/6164/6152/6169/6141/6165/6132/6188/6209/6218/6224/6228/6161/6147/6154/7311/6201/6175/23471/6146/6205/9349/130617/9045/6208/6125/6727/6134/6159	38
GOTERM_BP	GO:0000184	nuclear-transcribed mRNA catabolic process, nonsense-mediated decay	41/1957	120/18493	3.3851e-12	8.53192e-10	6207/6156/6122/6135/6222/6235/6203/6136/6189/6155/6164/6152/6169/6141/6165/6132/6188/6209/6218/6224/6228/6161/6147/6154/7311/6201/6175/6146/6205/26986/9349/9045/9939/6208/6125/26019/51594/6134/4686/6159/9887	41
GOTERM_BP	GO:0070972	protein localization to endoplasmic reticulum	46/1957	146/18493	4.38636e-12	1.05949e-09	6207/6156/6122/6135/6222/6235/6203/6136/6189/6155/6164/6152/6169/6141/6165/10134/6132/6188/6209/6218/6224/6228/6161/6147/6154/60559/7311/6201/6175/23471/3638/6146/6205/9349/7095/130617/9045/10890/6208/439/6125/6727/9789/6134/11014/6159	46
GOTERM_BP	GO:0034109	homotypic cell-cell adhesion	30/1957	76/18493	4.35192e-11	9.97235e-09	2316/71/7414/928/2039/239/1192/3690/60/64805/3674/3611/10398/6850/83706/2811/5578/375033/5912/5291/6352/4352/9158/84959/5341/5592/5962/1465/7094/2621	30
GOTERM_BP	GO:0019884	antigen processing and presentation of exogenous antigen	42/1957	134/18493	4.47268e-11	9.97235e-09	3796/1173/8655/3123/1211/972/3108/140735/5720/6892/3122/3118/22920/829/948/51164/1213/10540/50856/51128/162/1785/3117/8517/3109/5641/3119/4012/163/8773/3133/7879/911/3832/10484/10053/912/821/8905/3134/10427/56992	42
GOTERM_BP	GO:1903311	regulation of mRNA metabolic process	64/1957	264/18493	1.40717e-10	3.02124e-08	7534/4904/8531/10643/4154/3178/9588/7529/708/6431/10140/4869/7311/9261/55796/580/51013/1025/7072/26986/10521/3184/3312/5578/25962/3183/9337/11052/27339/1869/23112/11051/9939/27316/891/5936/10236/3297/56339/29883/51594/23369/170506/7514/114609/1994/5725/83989/6651/4686/91746/22938/79675/27161/10772/10914/3181/1655/8106/8761/677/3192/328/57721	64
GOTERM_BP	GO:0022613	ribonucleoprotein complex biogenesis	98/1957	485/18493	1.78303e-10	3.69151e-08	6122/6135/6203/6136/11171/6155/6152/6169/6165/6209/6218/8665/26065/6228/6147/6154/708/6431/4869/27292/6201/2091/6175/51065/2483/51013/1968/10521/51631/51386/8233/219988/55272/11052/1983/9045/27339/51096/8562/27258/8663/11051/55623/8669/9092/472/6208/22803/10412/64965/7536/27316/4809/6059/6125/9908/197135/23064/29883/1653/23451/55127/23369/55813/7514/80153/4848/6134/55781/25980/117246/4686/79707/9…	98
GOTERM_BP	GO:0050878	regulation of body fluid levels	99/1957	493/18493	2.05927e-10	4.11642e-08	2316/7392/3048/7534/71/51266/3047/2821/7414/928/2039/6403/4778/2782/239/1192/3690/5154/2162/60/8766/340205/64805/5627/3674/3611/80739/998/2534/7057/2815/2814/708/5023/2149/30845/5575/5573/6915/10398/27347/6850/196527/3925/83706/2811/5578/5577/10362/51206/3708/829/948/9927/375033/353/231/8357/5912/1608/23028/5291/9060/4352/6714/2776/5054/9158/84959/5873/5196/5341/7450/5592/3020/5594/10855/5021/559…	99
GOTERM_BP	GO:0002478	antigen processing and presentation of exogenous peptide antigen	39/1957	126/18493	3.31899e-10	6.41339e-08	3796/1173/8655/3123/1211/972/3108/140735/6892/3122/3118/22920/829/948/51164/1213/10540/50856/51128/162/1785/3117/8517/3109/5641/3119/4012/163/8773/3133/7879/3832/10484/10053/821/8905/3134/10427/56992	39
GOTERM_BP	GO:0048002	antigen processing and presentation of peptide antigen	41/1957	139/18493	6.09463e-10	1.1397e-07	3796/1173/8655/3123/10134/1211/972/3108/140735/6892/3122/3118/22920/829/948/51164/1213/10540/50856/51128/162/1785/3117/8517/3109/5641/3119/4012/163/8773/55016/3133/7879/3832/10484/10053/821/8905/3134/10427/56992	41
GOTERM_BP	GO:0048193	Golgi vesicle transport	77/1957	359/18493	9.97254e-10	1.80659e-07	3796/58485/11345/8655/5627/10134/140735/55297/1445/30845/6892/6642/377/1315/3638/6643/381/163882/11031/23299/22920/6845/2060/10959/22870/829/51164/23423/10890/51542/23760/27095/10540/1523/8775/9276/100128327/51560/51128/51552/1785/5537/6710/10490/51762/4905/6399/374868/286/51594/51125/8773/60684/3064/150684/7109/22878/3832/10484/55770/9217/11014/60561/8452/9363/5877/10427/91949/57511/10079/56992/…	77
GOTERM_BP	GO:0002504	antigen processing and presentation of peptide or polysaccharide antigen via MHC class II	33/1957	102/18493	2.12742e-09	3.69652e-07	3796/1173/8655/3123/1211/972/7057/3108/140735/3122/3118/22920/829/51164/1213/10540/51128/162/1785/3117/3109/5641/3119/163/55016/7879/3832/10484/10053/821/8905/10427/56992	33
GOTERM_BP	GO:0006914	autophagy	92/1957	466/18493	2.23181e-09	3.69652e-07	2017/2597/1191/81631/11345/6009/1982/11315/55004/8655/823/5660/5476/5305/258010/9550/529/706/140735/1611/3953/55294/51024/5289/25793/665/51160/3312/27243/27131/3708/4077/9927/5049/3162/51652/84313/7251/1213/200576/143686/738/472/55255/10241/2308/4534/5291/25978/64121/54472/8517/83460/9100/3920/55432/6714/664/84938/3064/8767/826/440275/493856/7879/22878/10542/23032/11140/6622/10484/5595/5287/3146/…	92
GOTERM_BP	GO:0061919	process utilizing autophagic mechanism	92/1957	466/18493	2.23181e-09	3.69652e-07	2017/2597/1191/81631/11345/6009/1982/11315/55004/8655/823/5660/5476/5305/258010/9550/529/706/140735/1611/3953/55294/51024/5289/25793/665/51160/3312/27243/27131/3708/4077/9927/5049/3162/51652/84313/7251/1213/200576/143686/738/472/55255/10241/2308/4534/5291/25978/64121/54472/8517/83460/9100/3920/55432/6714/664/84938/3064/8767/826/440275/493856/7879/22878/10542/23032/11140/6622/10484/5595/5287/3146/…	92
GOTERM_BP	GO:0002495	antigen processing and presentation of peptide antigen via MHC class II	32/1957	101/18493	6.63704e-09	1.06875e-06	3796/1173/8655/3123/1211/972/3108/140735/3122/3118/22920/829/51164/1213/10540/51128/162/1785/3117/3109/5641/3119/163/55016/7879/3832/10484/10053/821/8905/10427/56992	32
GOTERM_BP	GO:0070671	response to interleukin-12	21/1957	50/18493	9.52661e-09	1.49259e-06	6648/1072/4478/5478/9446/5908/998/6647/6175/27250/961/829/3313/6775/1265/8767/5062/5898/3181/9987/5034	21
GOTERM_BP	GO:0019886	antigen processing and presentation of exogenous peptide antigen via MHC class II	31/1957	98/18493	1.18789e-08	1.81215e-06	3796/1173/8655/3123/1211/972/3108/140735/3122/3118/22920/829/51164/1213/10540/51128/162/1785/3117/3109/5641/3119/163/7879/3832/10484/10053/821/8905/10427/56992	31
GOTERM_BP	GO:0034248	regulation of cellular amide metabolic process	87/1957	453/18493	2.34799e-08	3.49007e-06	2597/1191/10289/6203/8531/10643/1982/51247/10209/6169/351/5476/55024/6188/387/7057/27102/26065/6154/708/10140/4869/51714/8301/51065/5165/7072/26986/3184/8672/23107/1979/9337/8440/1983/1974/25904/23112/8872/8663/9669/10128/9939/6208/136319/84324/6352/3658/5936/10236/6125/22927/197135/56339/29883/1653/274/8569/9451/23369/170506/9444/113251/8439/7175/4848/440275/5594/6134/1994/57409/4686/6197/27335/…	87
GOTERM_BP	GO:0008380	RNA splicing	88/1957	463/18493	3.22369e-08	4.67193e-06	6207/4904/11171/4154/3178/80145/153527/6638/5094/348093/9588/51691/708/6431/55796/2483/7072/26986/10521/51631/8233/3184/56259/3312/2521/25962/22826/3183/27339/5440/7307/27258/57805/11051/5434/9092/10625/9939/23028/7536/57187/64121/53938/27316/4809/151987/5936/102724594/27257/10236/22927/56339/23064/1653/23451/339487/53981/9444/55749/55285/25980/1994/5725/23091/83989/6651/4686/91746/22938/92906/88…	88
GOTERM_BP	GO:0006417	regulation of translation	79/1957	402/18493	3.73689e-08	5.28359e-06	2597/10289/6203/8531/10643/1982/51247/10209/6169/351/55024/6188/387/7057/27102/26065/6154/708/10140/4869/51714/51065/7072/26986/3184/8672/23107/1979/9337/8440/1983/1974/25904/23112/8872/8663/9669/10128/9939/6208/136319/84324/6352/3658/5936/10236/6125/22927/197135/56339/29883/1653/8569/9451/23369/170506/9444/113251/7175/4848/440275/5594/6134/1994/57409/4686/6197/27335/54952/9728/5595/27161/55037/1…	79
GOTERM_BP	GO:0071349	cellular response to interleukin-12	20/1957	49/18493	3.84241e-08	5.30344e-06	6648/1072/4478/5478/9446/5908/998/6647/6175/27250/961/829/3313/6775/1265/5062/5898/3181/9987/5034	20
GOTERM_BP	GO:0006446	regulation of translational initiation	26/1957	77/18493	3.95387e-08	5.33037e-06	10289/1982/51247/10209/55024/27102/4869/8672/1979/8440/1983/1974/8872/9669/6352/5936/22927/56339/1653/9451/7175/440275/57409/4686/27335/27161	26
GOTERM_BP	GO:0010256	endomembrane system organization	79/1957	403/18493	4.17661e-08	5.50268e-06	7534/1191/55004/8766/51411/998/7852/10313/1182/6647/8815/2149/7443/30845/5289/196527/2934/51160/7485/5578/8266/27243/10959/23423/10890/11235/85462/7917/51652/84313/7251/4000/23204/8436/11252/439/1785/23122/25978/51510/891/858/51062/81565/7110/22931/5873/9519/55353/274/23317/9451/60684/5604/3064/26509/5594/7879/22878/5869/10484/5595/3801/64400/9217/10419/124491/60561/80856/8874/23207/55968/1759/51…	79
GOTERM_BP	GO:2000116	regulation of cysteine-type endopeptidase activity	53/1957	232/18493	4.56232e-08	5.87729e-06	2821/1032/11315/27018/10049/6478/10134/6188/387/10550/2534/7057/834/5023/1611/2149/51024/2876/25824/340485/51065/114769/2934/4217/25816/80196/10935/5607/5272/23204/831/55031/3297/5641/6714/7429/9451/26355/8767/10542/6197/841/5062/6622/3146/27429/400410/9314/112399/57630/2621/6279/6280	53
GOTERM_BP	GO:0032984	protein-containing complex disassembly	66/1957	317/18493	5.19345e-08	6.54487e-06	3796/1072/81631/2039/4778/11345/120/51258/51263/11222/11213/2934/3925/55173/3312/9349/11344/23107/54541/27243/60488/829/8562/51652/7251/9948/9829/79752/8775/10241/136319/64965/7818/10884/5018/23122/25978/6182/6710/51510/6059/9181/1499/3920/64981/4905/23064/664/7429/58526/28973/5341/29766/1856/5962/196528/118/84311/51264/51073/124995/23274/55037/23557/26586/53918	66
GOTERM_BP	GO:0043281	regulation of cysteine-type endopeptidase activity involved in apoptotic process	49/1957	209/18493	6.16596e-08	7.60512e-06	2821/1032/11315/27018/10049/6478/10134/6188/387/10550/7057/834/5023/1611/2149/51024/2876/25824/340485/51065/114769/2934/4217/25816/80196/10935/5607/5272/23204/55031/3297/6714/7429/9451/26355/10542/6197/841/5062/6622/3146/27429/400410/9314/112399/57630/2621/6279/6280	49
GOTERM_BP	GO:2001242	regulation of intrinsic apoptotic signaling pathway	41/1957	161/18493	6.51951e-08	7.87366e-06	6648/1191/6135/1032/8531/11315/10134/6188/598/972/6154/6647/55294/51024/2876/6201/754/8725/10955/3301/8440/10961/7417/57805/10625/55031/259230/23028/64844/9181/599/6714/9451/27429/10059/8876/6477/22954/5034/6279/6280	41
GOTERM_BP	GO:0022618	ribonucleoprotein complex assembly	59/1957	275/18493	8.77992e-08	1.03872e-05	6122/6135/6136/11171/6152/6169/6209/8665/26065/6228/6147/708/6431/4869/6175/51065/1968/51631/51386/8233/219988/11052/1983/27339/8562/27258/8663/11051/8669/9092/472/6208/7536/27316/4809/6125/9908/197135/23064/29883/1653/23451/23369/80153/4848/6134/25980/4686/91746/27335/10419/27161/10772/636/6607/10978/25929/9326/3320	59
GOTERM_BP	GO:0071826	ribonucleoprotein complex subunit organization	61/1957	289/18493	9.89089e-08	1.12683e-05	6122/6135/6136/11171/6152/6169/6209/8665/26065/6228/6147/708/6431/4869/6175/51065/1968/51631/51386/8233/219988/11052/1983/27339/8562/27258/8663/11051/79752/8669/9092/472/6208/7536/27316/4809/6125/9908/197135/23064/29883/1653/23451/23369/80153/4848/6134/25980/4686/91746/27335/10419/27161/10772/636/6607/10978/25929/9326/53918/3320	61
GOTERM_BP	GO:0035722	interleukin-12-mediated signaling pathway	19/1957	47/18493	1.01027e-07	1.12683e-05	6648/1072/4478/5478/9446/5908/998/6647/6175/27250/829/3313/6775/1265/5062/5898/3181/9987/5034	19
GOTERM_BP	GO:0006403	RNA localization	52/1957	231/18493	1.01079e-07	1.12683e-05	10643/3178/80145/6209/6431/4869/2091/22948/23299/7263/23039/10574/11052/23279/7884/7307/10694/10128/9939/472/57187/84324/6059/5903/64062/3297/9908/26019/9818/55746/170506/53981/9444/7514/54439/7175/55781/4686/91746/3087/1977/8658/3181/636/129401/11269/55706/9887/8106/677/3192/9326	52
GOTERM_BP	GO:0000375	RNA splicing, via transesterification reactions	73/1957	377/18493	2.24452e-07	2.45499e-05	4904/11171/4154/3178/153527/6638/5094/348093/9588/51691/708/6431/55796/2483/7072/26986/10521/51631/8233/3184/56259/3312/2521/22826/3183/27339/5440/7307/27258/11051/5434/9092/9939/23028/7536/53938/27316/4809/5936/102724594/27257/10236/56339/23064/1653/23451/53981/55749/55285/25980/1994/5725/83989/6651/4686/91746/22938/8896/51645/9716/10419/3187/10772/10914/3181/392517/1655/6607/8106/3192/10978/259…	73
GOTERM_BP	GO:0043154	negative regulation of cysteine-type endopeptidase activity involved in apoptotic process	26/1957	84/18493	2.85032e-07	3.05987e-05	2821/1032/11315/27018/10049/6478/7057/2876/25824/114769/25816/80196/10935/5607/5272/23204/55031/6714/7429/10542/6197/5062/6622/9314/57630/2621	26
GOTERM_BP	GO:0000377	RNA splicing, via transesterification reactions with bulged adenosine as nucleophile	72/1957	374/18493	3.42083e-07	3.54117e-05	4904/11171/4154/3178/153527/6638/5094/348093/9588/51691/708/6431/55796/2483/7072/26986/10521/51631/8233/3184/56259/3312/2521/22826/3183/27339/5440/7307/27258/11051/5434/9092/9939/23028/7536/53938/27316/4809/5936/102724594/10236/56339/23064/1653/23451/53981/55749/55285/25980/1994/5725/83989/6651/4686/91746/22938/8896/51645/9716/10419/3187/10772/10914/3181/392517/1655/6607/8106/3192/10978/25929/577…	72
GOTERM_BP	GO:0000398	mRNA splicing, via spliceosome	72/1957	374/18493	3.42083e-07	3.54117e-05	4904/11171/4154/3178/153527/6638/5094/348093/9588/51691/708/6431/55796/2483/7072/26986/10521/51631/8233/3184/56259/3312/2521/22826/3183/27339/5440/7307/27258/11051/5434/9092/9939/23028/7536/53938/27316/4809/5936/102724594/10236/56339/23064/1653/23451/53981/55749/55285/25980/1994/5725/83989/6651/4686/91746/22938/8896/51645/9716/10419/3187/10772/10914/3181/392517/1655/6607/8106/3192/10978/25929/577…	72
GOTERM_BP	GO:0031503	protein-containing complex localization	58/1957	280/18493	3.93598e-07	4.00296e-05	26052/83658/3690/8655/80145/8766/6209/140735/6431/4869/8650/117178/22920/2060/23279/7884/7307/27020/9939/472/1785/57187/84324/5108/6059/5903/26019/163/9818/55746/11336/53981/7514/7175/55781/4686/91746/4983/89891/3087/57560/1977/23557/8417/7127/3181/1759/80173/129401/11269/55706/9887/8106/3192/5590/79809/55112/22858	58
GOTERM_BP	GO:0097193	intrinsic apoptotic signaling pathway	59/1957	287/18493	4.10294e-07	4.10082e-05	6648/1191/6135/1032/8531/11315/10134/6188/598/10550/972/6154/6647/55294/51024/2876/6201/51065/754/8725/10955/4217/54541/3301/8440/3708/1869/10961/11235/7917/3162/7417/57805/10625/472/8428/55031/259230/23028/64844/9181/599/6714/664/9451/22938/27429/81537/5591/8452/10059/1655/5163/8876/6477/22954/5034/6279/6280	59
GOTERM_BP	GO:2000117	negative regulation of cysteine-type endopeptidase activity	27/1957	91/18493	4.39669e-07	4.31993e-05	2821/1032/11315/27018/10049/6478/7057/2876/25824/114769/25816/80196/10935/5607/5272/23204/831/55031/6714/7429/10542/6197/5062/6622/9314/57630/2621	27
GOTERM_BP	GO:0051236	establishment of RNA localization	45/1957	198/18493	5.38909e-07	5.20676e-05	10643/3178/80145/6209/6431/4869/23299/7263/23039/11052/23279/7884/7307/10128/9939/472/57187/84324/6059/5903/64062/3297/9908/26019/9818/55746/53981/9444/7514/54439/7175/55781/4686/91746/3087/1977/8658/3181/129401/11269/55706/9887/8106/677/3192	45
GOTERM_BP	GO:0007265	Ras protein signal transduction	79/1957	430/18493	6.77429e-07	6.4378e-05	56882/3688/1072/397/30851/2782/9402/11315/8766/5872/2664/387/5867/9750/5908/998/326624/2149/56990/4893/6016/23365/57480/11031/3925/117178/2885/10981/5874/221472/395/10890/9927/5925/5516/389/27040/22800/51560/9886/5922/3837/51552/5912/1785/58480/51735/84932/10787/9181/55103/10125/4853/9908/51762/22836/22931/10982/28988/5873/1786/8727/9459/5962/9844/7879/5869/4983/5898/1017/10603/8452/8874/9363/273…	79
GOTERM_BP	GO:0002181	cytoplasmic translation	27/1957	93/18493	7.10406e-07	6.6423e-05	6156/6135/6235/8531/6152/6169/6141/6165/6132/8665/6228/6161/6154/6175/1968/51386/1983/8562/8663/8669/55854/5936/56339/170506/27335/51389/6159	27
GOTERM_BP	GO:0050657	nucleic acid transport	44/1957	195/18493	8.84663e-07	8.01311e-05	10643/3178/80145/6209/6431/4869/23299/7263/23039/11052/23279/7884/7307/10128/9939/57187/84324/6059/5903/64062/3297/9908/26019/9818/55746/53981/9444/7514/54439/7175/55781/4686/91746/3087/1977/8658/3181/129401/11269/55706/9887/8106/677/3192	44
GOTERM_BP	GO:0050658	RNA transport	44/1957	195/18493	8.84663e-07	8.01311e-05	10643/3178/80145/6209/6431/4869/23299/7263/23039/11052/23279/7884/7307/10128/9939/57187/84324/6059/5903/64062/3297/9908/26019/9818/55746/53981/9444/7514/54439/7175/55781/4686/91746/3087/1977/8658/3181/129401/11269/55706/9887/8106/677/3192	44
GOTERM_BP	GO:1903828	negative regulation of cellular protein localization	30/1957	111/18493	9.52244e-07	8.4172e-05	2039/30851/1173/11315/54741/598/2664/258010/9750/6672/11142/1445/1601/8650/8301/3638/7295/580/64114/3301/11261/948/9555/51104/1213/5569/55432/150684/55968/2621	30
GOTERM_BP	GO:2001233	regulation of apoptotic signaling pathway	73/1957	391/18493	9.58315e-07	8.4172e-05	6648/7534/2017/1191/6135/1032/8531/11315/6478/10134/6188/598/25994/972/2534/7057/7529/6154/6647/6672/55294/51024/2876/6201/10971/754/8725/2934/10955/64114/3301/8440/80196/1869/10961/3162/5607/7417/57805/4000/5859/10625/55031/259230/23028/2730/64844/9181/1499/599/6714/5054/664/5196/9451/26355/3064/162989/5519/841/5062/2395/27429/10059/57630/8876/8567/6477/22954/5034/7533/6279/6280	73
GOTERM_BP	GO:0097237	cellular response to toxic substance	50/1957	235/18493	1.07105e-06	9.267e-05	6648/3048/5742/3047/11315/60/5660/3178/9446/6188/301/3934/9588/6647/51024/2876/25824/51714/2879/7295/2113/4217/2936/948/10935/11235/23530/3162/128/7001/4790/2308/1785/1616/3297/2098/23064/664/6415/5536/26034/2395/9314/3049/8914/5151/59338/328/10516/6280	50
GOTERM_BP	GO:0050684	regulation of mRNA processing	34/1957	137/18493	1.59076e-06	0.000135612	4154/3178/9588/708/6431/55796/580/1025/7072/10521/3312/25962/11052/27339/11051/9939/27316/891/5936/3297/170506/5725/83989/6651/4686/91746/22938/10772/10914/3181/1655/8106/677/3192	34
GOTERM_BP	GO:2000641	regulation of early endosome to late endosome transport	10/1957	17/18493	1.66174e-06	0.00013961	4478/1601/51652/6714/23317/5604/5962/29934/5594/5595	10
GOTERM_BP	GO:0016236	macroautophagy	56/1957	279/18493	1.76717e-06	0.000146347	2597/81631/11345/6009/55004/8655/823/5305/9550/529/140735/5289/665/51160/27243/27131/4077/9927/5049/3162/51652/84313/7251/200576/143686/10241/4534/25978/64121/8517/83460/3920/55432/6714/664/84938/3064/8767/826/7879/22878/10542/11140/10484/5595/5287/27429/23274/5565/23557/9779/55968/8131/643246/51322/3964	56
GOTERM_BP	GO:0016050	vesicle organization	61/1957	314/18493	1.93886e-06	0.000158304	58485/26052/1173/55004/8766/301/1182/2149/6892/5289/8301/3638/26258/51160/10981/6845/23355/2060/27243/10959/22870/51652/84313/7251/27095/8775/9839/23607/51128/51552/1785/5537/25978/51510/858/10490/63915/51762/7110/4905/6399/5873/9519/55353/23317/8773/7109/7879/5869/10484/64400/9217/4033/23557/8452/3257/8417/1759/10427/57082/2157	61
GOTERM_BP	GO:0045333	cellular respiration	40/1957	176/18493	2.25481e-06	0.000181544	7388/11315/4698/4713/56181/1743/4191/7381/4714/23530/4724/2820/4718/8801/4696/5018/3658/891/4706/3421/4702/6834/4200/664/6391/4711/4719/1355/6622/2395/79675/10165/4720/55526/55847/4204/4704/29103/440567/7915	40
GOTERM_BP	GO:0042254	ribosome biogenesis	56/1957	282/18493	2.5e-06	0.000198527	6122/6135/6203/6136/6155/6152/6169/6165/6209/6218/6147/6154/708/4869/27292/6201/2091/6175/51065/2483/51013/10521/55272/9045/51096/55623/9092/6208/22803/10412/64965/4809/6059/6125/55127/55813/7514/6134/55781/117246/79707/134430/9790/124995/84135/11056/115752/10885/10813/84916/55006/705/90459/85865/9326/57109	56
GOTERM_BP	GO:0010498	proteasomal protein catabolic process	80/1957	452/18493	2.6304e-06	0.000199012	1191/6135/11345/11315/6478/10134/5688/5094/258010/267/79718/5691/5683/5720/5687/55294/2876/7311/1601/7337/11059/9861/64795/5887/51433/130617/80196/27339/7324/7917/84236/54461/5516/57805/51035/54467/90637/80011/6613/5686/996/23607/57162/25897/4534/54476/891/26235/6468/64844/10475/8697/55432/7110/197131/130507/5685/11101/23190/8881/5694/10299/51283/25898/150684/196394/51185/23640/4983/25937/23274/1…	80
GOTERM_BP	GO:0030194	positive regulation of blood coagulation	12/1957	25/18493	2.64968e-06	0.000199012	2039/6403/7057/2149/6915/196527/948/5054/5341/10855/2155/2147	12
GOTERM_BP	GO:1900048	positive regulation of hemostasis	12/1957	25/18493	2.64968e-06	0.000199012	2039/6403/7057/2149/6915/196527/948/5054/5341/10855/2155/2147	12
GOTERM_BP	GO:0061013	regulation of mRNA catabolic process	34/1957	140/18493	2.68725e-06	0.000199012	7534/4904/8531/10643/7529/10140/4869/7311/9261/51013/26986/3184/3312/5578/3183/9337/1869/23112/10236/56339/29883/51594/23369/170506/7514/114609/1994/79675/27161/8761/677/3192/328/57721	34
GOTERM_BP	GO:0030193	regulation of blood coagulation	23/1957	77/18493	2.71209e-06	0.000199012	928/2039/6403/239/5154/5627/7057/2149/6915/6850/196527/2811/5578/948/5054/84959/5341/5592/10855/7006/2155/2147/5624	23
GOTERM_BP	GO:1900046	regulation of hemostasis	23/1957	77/18493	2.71209e-06	0.000199012	928/2039/6403/239/5154/5627/7057/2149/6915/6850/196527/2811/5578/948/5054/84959/5341/5592/10855/7006/2155/2147/5624	23
GOTERM_BP	GO:2001252	positive regulation of chromosome organization	38/1957	165/18493	2.85715e-06	0.000207036	3178/22948/140609/1025/1487/3184/51433/10574/57708/9555/10694/5925/4000/5885/6886/472/23028/891/1499/7334/80349/8726/1786/170506/7175/5594/84250/22938/5595/5252/8658/8452/3181/4297/4204/9787/3192/25913	38
GOTERM_BP	GO:0015931	nucleobase-containing compound transport	49/1957	237/18493	3.23071e-06	0.000231215	10643/3178/80145/6209/11046/6431/4869/23299/7263/23039/11052/23279/7884/7307/10128/9939/57187/84324/6059/29957/5903/64062/3297/9908/26019/9818/55746/53981/9444/7514/54439/7175/55781/4686/91746/3087/1977/8658/23169/51000/3181/129401/11269/55706/23443/9887/8106/677/3192	49
GOTERM_BP	GO:0034470	ncRNA processing	69/1957	376/18493	3.53068e-06	0.000249602	6135/6203/6155/6165/6209/6218/6154/27292/6201/2091/2483/51013/10521/4087/3028/55272/9045/55656/51096/55623/9092/54901/6208/22803/10412/64965/4809/6125/10667/22929/56339/1653/339487/55127/51728/55813/54859/23587/55781/117246/4686/79707/63892/134430/9790/79979/84135/27161/8270/11056/115752/10885/8518/55621/3181/10813/54517/84916/142940/55006/705/134637/65123/10978/90459/9326/57109/79650/79691	69
GOTERM_BP	GO:0097581	lamellipodium organization	24/1957	84/18493	3.95431e-06	0.000276182	29780/3688/2017/7414/2039/23603/64805/998/10109/6642/6643/11344/8440/10810/10092/1785/10787/6714/22885/7429/9459/8874/54434/54961	24
GOTERM_BP	GO:0010970	transport along microtubule	35/1957	149/18493	4.33662e-06	0.000295757	83658/8655/351/25893/998/140735/6647/8409/2319/26258/23299/117178/3312/22920/5874/6845/54820/10128/1176/5108/81565/10125/63915/3064/89891/57560/23557/636/80173/10947/3192/5590/79809/55112/22858	35
GOTERM_BP	GO:0099111	microtubule-based transport	35/1957	149/18493	4.33662e-06	0.000295757	83658/8655/351/25893/998/140735/6647/8409/2319/26258/23299/117178/3312/22920/5874/6845/54820/10128/1176/5108/81565/10125/63915/3064/89891/57560/23557/636/80173/10947/3192/5590/79809/55112/22858	35
GOTERM_BP	GO:0050820	positive regulation of coagulation	12/1957	26/18493	4.4468e-06	0.000298484	2039/6403/7057/2149/6915/196527/948/5054/5341/10855/2155/2147	12
GOTERM_BP	GO:0030705	cytoskeleton-dependent intracellular transport	38/1957	168/18493	4.51103e-06	0.000298484	83658/203068/8655/351/25893/998/7846/140735/6647/8409/2319/26258/23299/117178/3312/22920/5874/6845/84790/54820/10128/1176/5108/81565/10125/63915/3064/89891/57560/23557/636/80173/10947/3192/5590/79809/55112/22858	38
GOTERM_BP	GO:0006405	RNA export from nucleus	33/1957	137/18493	4.53107e-06	0.000298484	3178/80145/6209/6431/4869/11052/23279/7884/7307/9939/57187/84324/6059/5903/64062/26019/9818/55746/53981/7514/54439/7175/55781/4686/91746/3087/1977/3181/129401/11269/55706/9887/8106	33
GOTERM_BP	GO:0051168	nuclear export	42/1957	194/18493	4.7763e-06	0.000311103	11315/3178/80145/6209/6431/6672/4869/7295/580/23039/5494/11052/23279/11261/7884/7307/9939/57187/84324/10892/6059/5903/64062/26019/9818/55746/53981/7514/54439/7175/55781/4686/91746/3087/1977/3181/129401/11269/55706/9887/8106/2621	42
GOTERM_BP	GO:1903320	regulation of protein modification by small protein conjugation or removal	46/1957	221/18493	5.28957e-06	0.000340707	6135/11315/6478/6188/2280/2534/706/9111/80762/8555/55294/6201/754/1025/7337/51160/648/9349/10362/3301/11261/51035/10625/57162/23028/54472/10892/54165/1616/64844/1499/6125/7334/25898/8767/150684/405/23640/10401/10363/7965/8452/8877/11065/23142/3320	46
GOTERM_BP	GO:0060627	regulation of vesicle-mediated transport	85/1957	498/18493	5.7098e-06	0.000363733	85439/4478/1191/3690/80230/26119/8766/301/9784/5867/5908/6813/5023/1445/1601/1950/8650/8301/94121/961/801/3638/6850/196527/967/51160/163882/5874/6845/27243/948/5532/10890/5413/3162/51652/7251/5795/79772/9829/11252/8775/23607/51128/1785/5291/23122/26228/84932/51762/6714/4905/5054/163/5873/274/23317/5604/79872/5962/29934/5594/5533/7879/5869/4983/134957/8832/6622/10484/22876/5595/55680/5898/3146/226…	85
GOTERM_BP	GO:0051169	nuclear transport	66/1957	360/18493	5.90275e-06	0.000371482	2316/11315/3178/80145/6209/6431/8815/6672/11142/4869/754/7295/580/6850/2533/23039/9349/5494/11052/23279/11261/7884/948/7307/4000/9939/3836/5569/3837/57187/84324/10892/6059/5936/5903/64062/26019/22931/9818/55746/53981/7514/54439/7175/5594/10553/55781/23633/4686/91746/3087/10526/727851/1977/8720/3181/51501/129401/11269/6607/55706/9887/8106/729540/25929/2621	66
GOTERM_BP	GO:0051028	mRNA transport	35/1957	151/18493	5.9596e-06	0.000371482	10643/3178/80145/6431/23299/23039/23279/7884/7307/10128/9939/57187/84324/5903/3297/9908/26019/9818/55746/53981/9444/7514/7175/4686/91746/3087/1977/8658/3181/129401/11269/55706/9887/8106/677	35
GOTERM_BP	GO:0043161	proteasome-mediated ubiquitin-dependent protein catabolic process	70/1957	389/18493	6.09132e-06	0.000375653	1191/6135/11315/6478/10134/5688/5094/258010/267/79718/5691/5683/5687/55294/7311/1601/7337/11059/9861/64795/5887/51433/130617/80196/7324/7917/54461/5516/57805/51035/54467/90637/6613/5686/996/23607/57162/25897/4534/54476/891/26235/6468/10475/8697/55432/197131/130507/5685/23190/8881/5694/10299/51283/25898/150684/196394/51185/23640/25937/23274/1017/8452/55968/51322/9232/6477/11065/9575/5689	70
GOTERM_BP	GO:0000209	protein polyubiquitination	51/1957	257/18493	7.04305e-06	0.000429774	23608/6478/25893/267/9111/55294/7311/54542/25793/580/7337/11059/64795/51433/80196/27339/7324/54461/54467/9520/25847/996/57162/25897/55905/54476/223082/26235/80204/6468/64844/257218/7334/10475/8697/4012/63893/26001/10477/8881/10299/55016/51283/51132/8658/8452/5930/6477/11065/22888/22954	51
GOTERM_BP	GO:0006913	nucleocytoplasmic transport	65/1957	357/18493	8.73748e-06	0.000523849	2316/11315/3178/80145/6209/6431/6672/11142/4869/754/7295/580/6850/2533/23039/9349/5494/11052/23279/11261/7884/948/7307/4000/9939/3836/5569/3837/57187/84324/10892/6059/5936/5903/64062/26019/22931/9818/55746/53981/7514/54439/7175/5594/10553/55781/23633/4686/91746/3087/10526/727851/1977/8720/3181/51501/129401/11269/6607/55706/9887/8106/729540/25929/2621	65
GOTERM_BP	GO:0050818	regulation of coagulation	23/1957	82/18493	8.76546e-06	0.000523849	928/2039/6403/239/5154/5627/7057/2149/6915/6850/196527/2811/5578/948/5054/84959/5341/5592/10855/7006/2155/2147/5624	23
GOTERM_BP	GO:0071902	positive regulation of protein serine/threonine kinase activity	60/1957	323/18493	1.01653e-05	0.000601306	805/896/5154/6188/3611/387/25994/972/7057/7852/6647/8654/2149/1445/7311/9261/1950/219771/5606/801/27347/6850/56034/4217/6283/221472/9802/10961/11235/1326/5607/7867/1647/7786/9839/6416/51347/5291/891/8517/1616/10125/7334/10454/6714/57498/28988/1856/5604/8767/5594/51719/4331/6622/5595/94056/959/142679/8567/9175	60
GOTERM_BP	GO:0051656	establishment of organelle localization	83/1957	491/18493	1.06457e-05	0.000623363	7534/58485/26052/8766/25893/6209/5908/998/6813/5023/8409/4869/801/26258/6850/23299/22920/5874/6845/27243/10959/22870/51164/11235/5413/3162/54820/27095/10540/10128/1176/27040/8775/10096/51128/3837/1785/23122/5537/25978/51510/891/8517/5108/6059/81565/9181/10125/63915/1499/10097/8697/4905/6399/5873/8773/3064/7514/55781/10948/7109/8832/6622/152185/10484/10053/2268/4033/57102/23557/8452/10059/55968/17…	83
GOTERM_BP	GO:0034599	cellular response to oxidative stress	55/1957	289/18493	1.13988e-05	0.000660788	6648/11315/5660/6188/301/3934/10550/2534/29920/9588/6647/55294/2876/25824/7295/25793/2530/2113/2539/4217/3184/2936/948/10935/11235/3162/7001/8428/2308/1785/29957/1499/3297/6714/23064/664/154807/5536/5594/405/6622/2395/5595/27429/1017/9314/51389/253827/5163/8876/5151/59338/328/5034/10516	55
GOTERM_BP	GO:0022900	electron transport chain	39/1957	182/18493	1.32255e-05	0.000759089	7388/11315/4698/2108/83442/10539/4713/2936/7381/9249/4714/4724/128/2820/4718/231/9167/2109/4129/4696/891/4706/4702/6834/4200/6391/4711/4719/57019/1355/6622/10165/4199/4720/4204/4704/29103/440567/7915	39
GOTERM_BP	GO:0002429	immune response-activating cell surface receptor signaling pathway	72/1957	414/18493	1.52219e-05	0.000864124	71/10666/9402/60/3123/6188/998/2534/10109/1445/10093/4893/974/54542/3122/961/121665/6850/3118/100423062/2533/2885/640/11119/7917/7456/5795/10092/50856/27040/1997/10096/2214/4790/973/10006/3117/5291/26228/8517/10892/10095/10787/11118/115352/10097/7334/10454/3119/6714/89857/123920/917/8767/5594/952/9844/3495/5062/5595/29085/3384/10603/2268/7006/7525/5747/1380/1967/148823/59338/3320	72
GOTERM_BP	GO:0043254	regulation of protein complex assembly	77/1957	451/18493	1.53536e-05	0.000864124	2017/4478/1191/2039/6403/11315/64805/120/6188/387/10923/258010/57180/998/10109/93663/10093/3638/2934/58497/3925/57606/2885/3312/11344/5494/8440/829/948/7417/5925/7456/9535/10092/6886/389/8775/10096/472/9886/253260/136319/51128/143098/6710/10095/10787/55832/9181/1499/10097/197135/6714/23064/7429/274/5341/29766/170506/3020/5962/7114/4848/118/51185/84250/6622/10484/3146/57763/10059/26036/10427/4204/…	77
GOTERM_BP	GO:0071900	regulation of protein serine/threonine kinase activity	83/1957	496/18493	1.56492e-05	0.000864392	805/1032/896/5154/60/6188/3611/387/25994/972/7057/7852/6647/8654/2149/11142/1445/7311/9261/1950/5575/5573/219771/27250/5606/11213/801/27347/25793/6850/56034/4217/6283/5577/221472/9802/3301/10961/64853/11235/9555/1326/5607/7251/5795/7867/1647/7786/9839/5569/6416/51347/5291/891/8517/1616/10125/7334/10454/6714/57498/28988/1856/5604/3064/26973/8767/5594/51719/4331/5998/11140/6622/5595/3087/94056/959/…	83
GOTERM_BP	GO:0009896	positive regulation of catabolic process	71/1957	407/18493	1.56566e-05	0.000864392	4478/1191/11315/10134/5305/258010/4946/1374/80762/55294/10140/1601/1950/112398/6642/754/25793/580/665/51160/11059/26986/3184/9337/9927/5049/23530/7917/3162/23112/54467/143686/90637/6613/472/10241/5045/25897/2308/5291/8517/10236/3297/4905/56339/29883/664/170506/3064/5962/25898/8767/440275/405/7879/23640/11140/6622/5595/3146/400410/23274/27161/5747/27352/51322/6832/677/57721/22954/3320	71
GOTERM_BP	GO:0032386	regulation of intracellular transport	73/1957	422/18493	1.60688e-05	0.000876396	2316/4478/2039/11315/2040/26119/54741/25893/10134/2664/258010/5908/998/2534/6813/4946/5023/6672/55294/11142/51024/1601/801/3638/7295/580/6850/665/6845/5494/11052/11261/948/11235/5413/3162/51652/79752/8775/9520/5569/51128/58480/5108/81565/5936/64062/55432/6714/22885/9818/23317/5604/5962/7514/54439/29934/7175/5594/55781/8832/10484/22876/5595/27429/2268/57102/23557/60561/10059/22902/10427/2621	73
GOTERM_BP	GO:0043624	cellular protein complex disassembly	43/1957	210/18493	1.61764e-05	0.000876396	3796/1072/2039/120/51258/51263/11222/2934/3925/55173/3312/11344/23107/60488/829/9948/9829/8775/136319/64965/7818/10884/5018/23122/6182/6710/6059/9181/64981/4905/7429/58526/28973/5341/29766/5962/118/84311/51264/51073/124995/55037/26586	43
GOTERM_BP	GO:0006888	ER to Golgi vesicle-mediated transport	43/1957	211/18493	1.82723e-05	0.000980781	58485/8655/5627/10134/140735/1315/3638/6845/10959/22870/829/51164/23423/27095/10540/8775/9276/100128327/51128/5537/6710/10490/4905/6399/286/60684/7109/22878/10484/9217/11014/60561/8452/9363/10427/91949/57511/2155/2147/2621/2159/5624/2157	43
GOTERM_BP	GO:0006364	rRNA processing	42/1957	205/18493	1.98997e-05	0.00105834	6135/6203/6155/6165/6209/6218/6154/27292/6201/2091/2483/51013/10521/55272/9045/51096/55623/9092/6208/22803/10412/64965/4809/6125/55127/55813/55781/117246/79707/134430/9790/84135/11056/115752/10885/10813/84916/55006/705/90459/9326/57109	42
GOTERM_BP	GO:0006890	retrograde vesicle-mediated transport, Golgi to ER	23/1957	86/18493	2.0584e-05	0.00108478	3796/6892/377/1315/381/23299/22920/10959/23423/23760/8775/9276/51560/4905/374868/51594/3064/3832/11014/60561/91949/10079/56992	23
GOTERM_BP	GO:0032482	Rab protein signal transduction	21/1957	75/18493	2.19087e-05	0.00113397	8766/5872/2664/5867/326624/11031/10981/5874/10890/51560/51552/84932/51762/22931/5873/7879/5869/9363/27352/116442/8567	21
GOTERM_BP	GO:1903313	positive regulation of mRNA metabolic process	21/1957	75/18493	2.19087e-05	0.00113397	9588/10140/26986/3184/3312/9337/27339/23112/11051/27316/891/10236/3297/56339/29883/170506/4686/22938/27161/677/57721	21
GOTERM_BP	GO:0016072	rRNA metabolic process	47/1957	240/18493	2.26373e-05	0.00115335	6135/6203/6155/6165/6209/6218/6154/27292/6201/2091/2483/51013/10521/55272/9045/342618/9555/51096/55623/9092/6208/22803/10412/64965/4809/10927/6125/55127/55813/162989/55781/117246/79707/134430/9790/84135/11056/115752/10885/10813/84916/55006/705/90459/9326/53918/57109	47
GOTERM_BP	GO:1903034	regulation of response to wounding	35/1957	160/18493	2.2681e-05	0.00115335	928/2039/6403/239/5154/5627/301/4638/7057/6431/2149/6915/6850/196527/29956/2811/5578/948/8428/23122/81565/5054/84959/7429/5341/5604/5592/10855/22876/3146/9314/7006/2155/2147/5624	35
GOTERM_BP	GO:0051258	protein polymerization	52/1957	275/18493	2.34455e-05	0.00118186	2017/2039/120/6188/387/57180/10109/93663/10048/10093/2879/2934/58497/3925/57606/2885/11344/27243/8440/10810/829/395/7417/54820/51652/7456/9535/10092/10096/9886/55125/253260/136319/23122/6710/81565/10095/10787/10097/7429/58526/274/29766/51019/5962/7114/118/6622/10059/4204/11065/3320	52
GOTERM_BP	GO:0038093	Fc receptor signaling pathway	39/1957	187/18493	2.54499e-05	0.00127184	71/9402/60/5534/998/2534/10109/10093/961/801/6850/2885/5532/7456/5795/10092/27040/10096/2214/4790/10006/5291/8517/10892/10095/10787/10097/10454/6714/917/5594/9844/5062/5595/2268/7006/7525/5747/3320	39
GOTERM_BP	GO:0010543	regulation of platelet activation	12/1957	30/18493	2.65783e-05	0.00130355	928/2039/6403/239/5154/6850/5578/84959/5341/5592/7006/2147	12
GOTERM_BP	GO:0010639	negative regulation of organelle organization	67/1957	384/18493	2.67121e-05	0.00130355	1191/2039/3178/120/598/25994/706/54386/56890/4869/2876/5573/3638/2934/3925/7515/1487/3183/11344/27243/829/395/9555/4000/9535/5885/472/136319/4534/1785/23122/6710/891/9181/3005/197135/6714/7153/664/7429/58526/1786/29766/3020/5962/7114/7175/118/29028/4331/7879/6622/2395/27429/146691/23274/5252/8658/10059/26586/26036/4204/9232/3192/25913/5810/57489	67
GOTERM_BP	GO:0007229	integrin-mediated signaling pathway	25/1957	99/18493	2.67591e-05	0.00130355	2316/3688/2039/3690/3674/3611/80739/998/961/6850/2530/967/83706/2533/7076/27040/6714/5341/2268/7094/8452/7006/5747/84695/3676	25
GOTERM_BP	GO:0031396	regulation of protein ubiquitination	40/1957	195/18493	3.01222e-05	0.00145515	6135/11315/6478/6188/2280/2534/706/9111/80762/8555/55294/6201/754/1025/7337/51160/648/9349/3301/11261/51035/10625/57162/23028/10892/54165/1616/64844/6125/7334/25898/8767/150684/23640/7965/8452/8877/11065/23142/3320	40
GOTERM_BP	GO:0002768	immune response-regulating cell surface receptor signaling pathway	75/1957	445/18493	3.09361e-05	0.0014721	71/10666/9402/60/3123/6188/5534/998/2534/10109/1445/10093/4893/974/54542/3122/961/801/121665/6850/3118/100423062/2533/2885/640/11119/5532/7917/7456/5795/10092/50856/27040/1997/10096/2214/4790/973/10006/3117/5291/26228/8517/10892/10095/10787/11118/115352/10097/7334/10454/3119/6714/89857/123920/917/8767/5594/952/9844/3495/5062/5595/29085/3384/10603/2268/7006/7525/5747/1380/1967/148823/59338/3320	75
GOTERM_BP	GO:1903312	negative regulation of mRNA metabolic process	20/1957	71/18493	3.10159e-05	0.0014721	4904/8531/708/6431/10140/9261/580/1025/26986/3184/3183/1869/27316/51594/114609/1994/5725/10772/3181/3192	20
GOTERM_BP	GO:0043488	regulation of mRNA stability	28/1957	118/18493	3.12348e-05	0.0014721	7534/4904/8531/10643/7529/4869/7311/9261/51013/26986/3184/3312/5578/3183/1869/10236/56339/23369/170506/7514/114609/1994/79675/8761/677/3192/328/57721	28
GOTERM_BP	GO:0045947	negative regulation of translational initiation	9/1957	18/18493	3.25924e-05	0.00152369	51247/55024/27102/1979/5936/9451/7175/440275/27161	9
GOTERM_BP	GO:0046823	negative regulation of nucleocytoplasmic transport	10/1957	22/18493	3.35433e-05	0.0015556	11315/6672/11142/7295/580/11261/948/5569/7175/2621	10
GOTERM_BP	GO:0009161	ribonucleoside monophosphate metabolic process	55/1957	300/18493	3.4209e-05	0.00157389	2597/2821/3098/4354/7388/11315/5315/3615/4698/387/706/51727/3251/4713/11165/3312/7381/5230/54541/4714/4724/283209/353/4718/9167/8833/4696/2026/891/4706/4702/6834/5236/6391/4711/7114/405/2987/4719/272/1355/6622/2395/10165/10059/4720/64077/55526/51292/55312/4204/4704/29103/2203/440567	55
GOTERM_BP	GO:0032387	negative regulation of intracellular transport	19/1957	66/18493	3.4872e-05	0.00158048	2039/11315/2664/258010/5908/6672/11142/3638/7295/580/11261/948/3162/5569/55432/29934/7175/8832/2621	19
GOTERM_BP	GO:0009167	purine ribonucleoside monophosphate metabolic process	53/1957	286/18493	3.48977e-05	0.00158048	2597/2821/3098/4354/7388/11315/5315/3615/4698/387/706/3251/4713/11165/3312/7381/5230/54541/4714/4724/283209/353/4718/9167/8833/4696/2026/891/4706/4702/6834/5236/6391/4711/7114/405/2987/4719/272/1355/6622/2395/10165/10059/4720/64077/55526/51292/4204/4704/29103/2203/440567	53
GOTERM_BP	GO:0031124	mRNA 3'-end processing	24/1957	95/18493	3.81901e-05	0.00171607	80145/351/6431/580/1025/26986/25962/11052/7884/7307/11051/9939/57187/84324/891/3297/170506/53981/4686/64895/10914/8106/677/10978	24
GOTERM_BP	GO:0009126	purine nucleoside monophosphate metabolic process	53/1957	287/18493	3.84834e-05	0.00171607	2597/2821/3098/4354/7388/11315/5315/3615/4698/387/706/3251/4713/11165/3312/7381/5230/54541/4714/4724/283209/353/4718/9167/8833/4696/2026/891/4706/4702/6834/5236/6391/4711/7114/405/2987/4719/272/1355/6622/2395/10165/10059/4720/64077/55526/51292/4204/4704/29103/2203/440567	53
GOTERM_BP	GO:0051291	protein heterooligomerization	30/1957	132/18493	3.98944e-05	0.00176541	3048/3047/2782/8366/3987/8367/3611/972/7529/8363/5023/4144/8365/55752/2885/27243/11052/51652/11051/8357/10801/9818/84105/5536/989/51719/2193/3049/5092/5590	30
GOTERM_BP	GO:0006979	response to oxidative stress	74/1957	441/18493	4.04503e-05	0.00177644	6648/5742/11315/5660/351/6188/301/3934/10550/2534/29920/5037/9588/6647/55294/2876/25824/2879/9124/7295/25793/2530/2113/2539/4217/7515/3184/2936/948/10935/11235/9555/3162/5516/7001/4482/79772/143686/8428/2308/1785/2730/29957/1499/3297/6714/23064/664/154807/6391/5536/5594/952/26034/405/7486/6622/2395/5595/27429/1017/9314/51389/253827/694/4720/5163/8876/5151/59338/328/57001/5034/10516	74
GOTERM_BP	GO:0043487	regulation of RNA stability	29/1957	126/18493	4.16451e-05	0.00181516	7534/4904/8531/10643/7529/4869/7311/9261/51013/26986/3184/3312/5578/3183/1869/10236/56339/23369/170506/7514/114609/1994/79675/9887/8761/677/3192/328/57721	29
GOTERM_BP	GO:0042176	regulation of protein catabolic process	65/1957	375/18493	4.30599e-05	0.00186146	2316/4478/1191/6135/11345/11315/4953/5476/10134/258010/2534/4946/80762/5720/55294/2876/1601/6201/1950/112398/6642/11213/754/580/7337/51160/11059/7076/9349/5887/7917/57805/51035/54467/51582/90637/80011/6613/5045/25897/2308/4534/64844/6125/55432/7110/4905/55353/5962/7514/25898/29934/54971/150684/79031/7879/23640/4983/6622/23274/5747/27352/51322/22954/3320	65
GOTERM_BP	GO:0015980	energy derivation by oxidation of organic compounds	50/1957	267/18493	4.33494e-05	0.00186146	7388/11315/4698/7360/83931/3953/4713/5834/56181/1743/5500/4191/7381/4714/23530/4724/283209/2820/4718/5257/8801/4696/5018/3658/891/4706/3421/4702/6834/3572/4200/664/5236/6391/4711/4719/1355/6622/2395/79675/3146/10165/4720/55526/55847/4204/4704/29103/440567/7915	50
GOTERM_BP	GO:0045454	cell redox homeostasis	19/1957	67/18493	4.38936e-05	0.00186301	9588/83442/2876/25824/112398/10539/51714/7295/2936/10935/23530/7001/81542/23341/51061/57544/328/79770/5034	19
GOTERM_BP	GO:0070585	protein localization to mitochondrion	31/1957	139/18493	4.40284e-05	0.00186301	7534/3098/54741/706/7529/55294/51024/10971/801/25793/665/3301/1869/9927/9520/401505/58480/22885/4285/841/131118/27429/100652748/3308/10059/26517/29103/10531/54332/3320/7533	31
GOTERM_BP	GO:0031440	regulation of mRNA 3'-end processing	11/1957	27/18493	4.71603e-05	0.00198107	580/1025/25962/11052/11051/891/3297/170506/4686/10914/677	11
GOTERM_BP	GO:0007163	establishment or maintenance of cell polarity	40/1957	199/18493	4.87768e-05	0.00203424	29780/1072/4478/3611/56288/387/9750/83700/5908/998/10653/2319/2934/10890/54820/9578/4000/9948/10092/389/10096/253260/143098/58480/23122/81565/9181/10097/22836/64098/286/917/3064/4983/55968/5747/22902/5590/51057/3320	40
GOTERM_BP	GO:1903649	regulation of cytoplasmic transport	10/1957	23/18493	5.37246e-05	0.00222458	4478/1601/51652/6714/23317/5604/5962/29934/5594/5595	10
GOTERM_BP	GO:0006611	protein export from nucleus	37/1957	180/18493	5.614e-05	0.00230811	11315/80145/6209/6431/6672/4869/7295/580/23039/5494/23279/11261/7884/7307/9939/57187/84324/6059/5903/26019/9818/55746/53981/7514/7175/55781/4686/91746/3087/1977/3181/129401/11269/55706/9887/8106/2621	37
GOTERM_BP	GO:0042177	negative regulation of protein catabolic process	29/1957	128/18493	5.65661e-05	0.00230925	2316/6135/11345/11315/5476/258010/2534/6201/11213/7076/9349/7917/57805/51035/51582/80011/5045/4534/64844/6125/55432/55353/29934/54971/79031/4983/6622/23274/51322	29
GOTERM_BP	GO:0016482	cytosolic transport	33/1957	154/18493	5.91641e-05	0.00239842	4478/55297/1601/30845/5289/6642/6643/2060/27131/51542/51652/1213/200576/738/51560/51552/10490/10097/22836/6714/63893/23317/5604/5962/29934/5594/7109/7879/5595/64400/79735/9779/10772	33
GOTERM_BP	GO:1904358	positive regulation of telomere maintenance via telomere lengthening	13/1957	37/18493	6.19075e-05	0.00248531	3178/22948/140609/10574/10694/472/1499/170506/5594/5595/8658/3181/25913	13
GOTERM_BP	GO:0072655	establishment of protein localization to mitochondrion	30/1957	135/18493	6.22695e-05	0.00248531	7534/3098/54741/706/7529/55294/51024/10971/801/25793/665/3301/1869/9927/9520/401505/58480/22885/4285/841/131118/27429/100652748/3308/26517/29103/10531/54332/3320/7533	30
GOTERM_BP	GO:0048013	ephrin receptor signaling pathway	21/1957	80/18493	6.25936e-05	0.00248531	71/1173/60/387/998/2534/10109/10093/8440/10092/10096/10095/10097/6714/163/1947/8874/1759/7525/26037/5747	21
GOTERM_BP	GO:0042775	mitochondrial ATP synthesis coupled electron transport	22/1957	86/18493	6.45921e-05	0.00253644	7388/11315/4698/4713/7381/4714/4724/4718/4696/891/4706/4702/6391/4711/4719/1355/6622/4720/4204/4704/29103/440567	22
GOTERM_BP	GO:0022904	respiratory electron transport chain	25/1957	104/18493	6.47565e-05	0.00253644	7388/11315/4698/4713/7381/4714/4724/2820/4718/4696/891/4706/4702/6391/4711/4719/1355/6622/10165/4720/4204/4704/29103/440567/7915	25
GOTERM_BP	GO:0071426	ribonucleoprotein complex export from nucleus	29/1957	129/18493	6.57026e-05	0.00253918	80145/6209/6431/4869/23279/7884/7307/9939/57187/84324/6059/5903/26019/9818/55746/53981/7514/7175/55781/4686/91746/3087/1977/3181/129401/11269/55706/9887/8106	29
GOTERM_BP	GO:1902850	microtubule cytoskeleton organization involved in mitosis	29/1957	129/18493	6.57026e-05	0.00253918	3796/2316/8766/387/8555/3925/27243/54820/1213/10540/55125/3837/23122/25978/51510/891/81565/9181/3064/7175/3832/152185/6905/8243/8658/55968/8556/4204/3192	29
GOTERM_BP	GO:0045861	negative regulation of proteolysis	62/1957	359/18493	7.13358e-05	0.00273863	2597/2821/6135/1032/11345/11315/27018/10049/351/6478/5627/258010/7057/10653/5037/2876/25824/6201/8301/114769/2734/1475/25816/7076/9349/80196/10935/7917/5269/5607/5272/57805/51035/23204/80011/5045/831/55031/4534/64844/6125/55432/6714/5054/7429/274/29934/79031/10542/6197/4983/5062/6622/23274/9314/57630/51322/9232/2147/3053/2621/5104	62
GOTERM_BP	GO:0043406	positive regulation of MAP kinase activity	48/1957	258/18493	7.22136e-05	0.00275409	5154/6188/3611/972/7057/7852/6647/8654/2149/1445/7311/9261/1950/5606/27347/6850/56034/4217/6283/221472/10961/11235/1326/5607/7867/1647/7786/9839/6416/51347/5291/8517/1616/10125/7334/10454/6714/57498/28988/1856/5604/8767/5594/5595/959/142679/8567/9175	48
GOTERM_BP	GO:0009895	negative regulation of catabolic process	52/1957	287/18493	7.59583e-05	0.00286638	2316/4904/6135/11345/8531/1982/11315/5476/258010/2534/706/1611/3953/10140/6201/9261/11213/26986/3184/7076/3183/9349/54541/1869/7917/3162/57805/51035/51582/10128/80011/5045/4534/64844/6125/55432/55353/51594/170506/29934/54971/114609/1994/79031/4983/6622/27429/23274/5747/51322/2203/3192	52
GOTERM_BP	GO:0071166	ribonucleoprotein complex localization	29/1957	130/18493	7.61467e-05	0.00286638	80145/6209/6431/4869/23279/7884/7307/9939/57187/84324/6059/5903/26019/9818/55746/53981/7514/7175/55781/4686/91746/3087/1977/3181/129401/11269/55706/9887/8106	29
GOTERM_BP	GO:0042773	ATP synthesis coupled electron transport	22/1957	87/18493	7.79213e-05	0.00291426	7388/11315/4698/4713/7381/4714/4724/4718/4696/891/4706/4702/6391/4711/4719/1355/6622/4720/4204/4704/29103/440567	22
GOTERM_BP	GO:0031330	negative regulation of cellular catabolic process	46/1957	245/18493	8.05932e-05	0.00299487	4904/6135/11345/8531/1982/11315/5476/258010/706/1611/3953/10140/6201/9261/26986/3184/7076/3183/9349/54541/1869/7917/3162/57805/51035/10128/80011/5045/4534/64844/6125/55432/55353/51594/170506/114609/1994/79031/4983/6622/27429/23274/5747/51322/2203/3192	46
GOTERM_BP	GO:0006120	mitochondrial electron transport, NADH to ubiquinone	15/1957	48/18493	8.14499e-05	0.00300742	11315/4698/4713/4714/4724/4718/4696/4706/4702/4711/4719/6622/4720/4704/29103	15
GOTERM_BP	GO:0021762	substantia nigra development	14/1957	43/18493	8.48824e-05	0.00306325	805/8655/60/387/998/10971/801/2539/2746/4129/54145/80264/5810/7533	14
GOTERM_BP	GO:0090317	negative regulation of intracellular protein transport	14/1957	43/18493	8.48824e-05	0.00306325	2039/11315/2664/258010/6672/11142/3638/7295/580/11261/948/5569/55432/2621	14
GOTERM_BP	GO:0045022	early endosome to late endosome transport	13/1957	38/18493	8.50392e-05	0.00306325	4478/1601/5289/51652/6714/23317/5604/5962/29934/5594/7879/5595/64400	13
GOTERM_BP	GO:0032200	telomere organization	35/1957	170/18493	8.50755e-05	0.00306325	8366/3178/8367/54386/8363/6672/22948/140609/8365/7515/3184/3183/10574/10694/8357/472/5422/1499/6714/57804/170506/3020/5594/7486/5595/1763/5591/8658/5981/3181/9887/3192/25913/328/3320	35
GOTERM_BP	GO:0010506	regulation of autophagy	54/1957	303/18493	8.7862e-05	0.00311129	2017/2597/6009/1982/11315/55004/823/5660/5476/5305/258010/9550/529/706/1611/3953/55294/25793/665/27131/3708/9927/5049/3162/200576/143686/472/55255/10241/2308/4534/5291/64121/8517/9100/664/3064/8767/826/440275/493856/10542/23032/11140/6622/5595/3146/27429/23274/10059/8131/5747/116442/51322	54
GOTERM_BP	GO:0030100	regulation of endocytosis	48/1957	260/18493	8.7925e-05	0.00311129	85439/1191/3690/80230/26119/9784/5867/1445/1601/1950/8650/8301/961/801/6850/196527/967/51160/948/5532/7251/5795/79772/9829/11252/23607/1785/5291/26228/6714/5054/163/5873/274/79872/29934/5533/5869/4983/6622/55680/3146/2268/9779/10059/1759/636/2621	48
GOTERM_BP	GO:0000723	telomere maintenance	33/1957	157/18493	8.802e-05	0.00311129	8366/3178/8367/54386/8363/6672/22948/140609/8365/7515/3184/3183/10574/10694/472/5422/1499/6714/57804/170506/5594/7486/5595/1763/5591/8658/5981/3181/9887/3192/25913/328/3320	33
GOTERM_BP	GO:0031331	positive regulation of cellular catabolic process	60/1957	347/18493	8.94162e-05	0.00314149	4478/1191/11315/10134/5305/258010/1374/55294/10140/1601/1950/754/25793/665/26986/3184/9337/9927/5049/23530/7917/3162/23112/54467/143686/90637/6613/472/10241/5045/25897/2308/5291/8517/10236/3297/56339/29883/664/170506/3064/5962/25898/8767/440275/405/23640/11140/6622/5595/3146/400410/23274/27161/5747/51322/6832/677/57721/3320	60
GOTERM_BP	GO:0071786	endoplasmic reticulum tubular network organization	8/1957	16/18493	9.12839e-05	0.00318779	10313/10890/23204/51062/22931/124491/80856/55161	8
GOTERM_BP	GO:0007098	centrosome cycle	27/1957	119/18493	9.78706e-05	0.00339734	1069/8409/56890/4869/117178/27243/54820/51652/54461/1647/55125/25978/51510/5108/81565/1499/26973/7514/54875/23032/3832/152185/1017/55968/26005/54930/9851	27
GOTERM_BP	GO:0007029	endoplasmic reticulum organization	15/1957	49/18493	0.000105998	0.00365755	10313/7485/8266/10890/7917/23204/439/858/51062/22931/9451/9217/124491/80856/55161	15
GOTERM_BP	GO:0031098	stress-activated protein kinase signaling cascade	55/1957	313/18493	0.0001118	0.00383382	351/6188/387/10550/998/7311/9261/27250/5606/27347/6850/4217/221472/3301/4077/3276/64853/11235/1326/5607/1647/5859/231/7786/9839/8428/6416/4790/2308/51347/8517/1616/10125/7334/10454/28988/1856/51135/5604/9459/8767/114609/10987/4750/5594/5062/5595/3146/959/142679/57630/285613/677/6504/9175	55
GOTERM_BP	GO:0052548	regulation of endopeptidase activity	69/1957	417/18493	0.000112429	0.00383382	2597/2821/1032/11315/27018/10049/351/6478/5627/10134/6188/387/10550/2534/7057/10653/5037/834/5023/5720/1611/2149/51024/2876/25824/340485/8301/51065/114769/2934/4217/1475/25816/7076/80196/10935/5269/5607/5272/23204/5045/831/55031/3297/5641/6714/5054/7429/274/9451/26355/8767/10542/6197/841/5062/6622/3146/27429/400410/9314/112399/57630/9232/3053/2621/5104/6279/6280	69
GOTERM_BP	GO:0140014	mitotic nuclear division	50/1957	277/18493	0.000113838	0.00385916	3796/2316/896/6152/8766/387/5037/8555/1950/51433/27243/9555/54820/54461/5925/5885/23244/472/55125/996/3837/23122/25978/51510/891/9918/858/81565/8697/8881/25936/7175/55781/84250/23383/3832/152185/146691/10419/8243/8658/8452/55968/8556/9735/9232/9787/11065/3192/54619	50
GOTERM_BP	GO:0071496	cellular response to external stimulus	57/1957	328/18493	0.000115369	0.00388835	4149/7392/81631/11345/2752/3178/64805/25994/3934/9750/2534/834/6647/1611/5289/654/10634/4217/3312/3162/1647/143686/8428/6416/4790/2308/136319/552/64121/3658/3297/22927/3920/664/53335/9451/1265/440275/5594/841/23032/7486/22938/5595/5287/23394/23274/8658/10059/8131/54434/643246/29103/2805/54332/83990/2621	57
GOTERM_BP	GO:0031123	RNA 3'-end processing	31/1957	146/18493	0.000116756	0.00388985	80145/351/6431/2091/580/1025/26986/25962/3028/11052/7884/55656/7307/11051/9939/57187/84324/891/3297/51728/170506/53981/4686/64895/10914/6832/8106/677/10978/90459/79650	31
GOTERM_BP	GO:0051092	positive regulation of NF-kappaB transcription factor activity	31/1957	146/18493	0.000116756	0.00388985	1191/351/6188/54386/5687/4869/7311/11213/114769/6283/948/10935/4790/136319/8517/10892/9181/7334/10454/10475/51135/8767/114609/959/8877/5590/9575/9175/22954/6279/6280	31
GOTERM_BP	GO:0031669	cellular response to nutrient levels	43/1957	228/18493	0.000121964	0.00404013	4149/7392/81631/11345/2752/3178/64805/25994/3934/2534/6647/1611/5289/10634/4217/3312/3162/143686/8428/2308/64121/3658/3297/3920/53335/9451/440275/5594/23032/7486/22938/5595/5287/23274/8658/10059/8131/54434/643246/29103/54332/83990/2621	43
GOTERM_BP	GO:0002431	Fc receptor mediated stimulatory signaling pathway	30/1957	140/18493	0.000125522	0.00413438	71/10666/60/998/2534/10109/1445/10093/961/6850/2885/7456/5795/10092/10096/2214/10006/5291/10095/10787/10097/6714/917/5594/9844/5595/2268/7525/5747/3320	30
GOTERM_BP	GO:0009123	nucleoside monophosphate metabolic process	56/1957	322/18493	0.000129133	0.00422928	2597/2821/3098/4354/7388/11315/5315/3615/4698/387/706/56953/51727/3251/4713/11165/3312/7381/5230/54541/4714/4724/283209/353/4718/9167/8833/4696/2026/891/4706/4702/6834/5236/6391/4711/7114/405/2987/4719/272/1355/6622/2395/10165/10059/4720/64077/55526/51292/55312/4204/4704/29103/2203/440567	56
GOTERM_BP	GO:0031532	actin cytoskeleton reorganization	23/1957	96/18493	0.000131905	0.00427182	2316/29780/2017/397/2039/301/387/998/2934/50848/27032/9578/9535/9886/253260/23607/26228/64098/5341/8394/29085/5898/26037	23
GOTERM_BP	GO:2001243	negative regulation of intrinsic apoptotic signaling pathway	23/1957	96/18493	0.000131905	0.00427182	6648/1191/1032/8531/11315/598/972/2876/754/8725/3301/7417/57805/10625/55031/23028/64844/9181/599/6714/27429/8876/22954	23
GOTERM_BP	GO:0031333	negative regulation of protein complex assembly	29/1957	134/18493	0.00013449	0.00427296	1191/2039/11315/120/258010/998/3638/2934/3925/11344/5494/829/7417/136319/6710/9181/197135/6714/7429/29766/5962/7114/118/51185/6622/3146/26036/29103/5590	29
GOTERM_BP	GO:0061041	regulation of wound healing	29/1957	134/18493	0.00013449	0.00427296	928/2039/6403/239/5154/5627/301/4638/7057/6431/2149/6915/6850/196527/2811/5578/948/23122/5054/84959/7429/5341/5592/10855/3146/7006/2155/2147/5624	29
GOTERM_BP	GO:2001234	negative regulation of apoptotic signaling pathway	42/1957	222/18493	0.000135271	0.00427296	6648/2017/1191/1032/8531/11315/6478/598/25994/972/2534/7057/2876/754/8725/64114/3301/80196/3162/5607/7417/57805/4000/5859/10625/55031/23028/2730/64844/9181/1499/599/6714/5054/5196/3064/841/2395/27429/57630/8876/22954	42
GOTERM_BP	GO:0051090	regulation of DNA-binding transcription factor activity	68/1957	412/18493	0.00013566	0.00427296	2316/1191/11315/7292/351/6188/54386/5687/6672/1611/4869/149951/7311/11213/6850/114769/2958/8887/307/6283/11261/948/10935/3162/5607/3398/5925/4790/57162/136319/23028/8517/10892/9181/1499/9908/7334/10454/10475/4601/3397/1856/51135/7114/8767/114609/10987/440275/5594/150684/51132/200186/8896/5595/6883/959/25855/9314/51389/8877/6929/5590/9575/9175/22954/2621/6279/6280	68
GOTERM_BP	GO:1901987	regulation of cell cycle phase transition	68/1957	412/18493	0.00013566	0.00427296	7277/1032/896/51720/203068/8655/1069/10383/8766/351/301/7846/6154/8555/5720/55294/4869/51065/5933/25793/5577/51433/9337/25904/1869/3276/4303/9555/3398/54820/5925/5885/10540/1647/5569/472/10217/55125/1112/51347/5087/55031/81853/891/5108/8697/29883/29766/5962/11073/7175/4848/55781/2273/1017/9314/5591/60561/8452/8556/4204/9735/9787/54930/11065/677/328/3320	68
GOTERM_BP	GO:0033044	regulation of chromosome organization	57/1957	330/18493	0.000136363	0.00427296	3178/54386/9874/22948/140609/1025/7515/1487/3184/3183/51433/10574/57708/9555/10694/5925/4000/5885/6886/472/996/23028/891/1499/3005/7334/8697/6714/7153/80349/4524/8726/1786/170506/3020/7175/5594/55781/29028/84250/4331/22938/6622/5595/5252/8658/144108/8452/817/3181/26036/4297/4204/9232/9787/3192/25913	57
GOTERM_BP	GO:0032147	activation of protein kinase activity	56/1957	323/18493	0.000140461	0.00432718	3690/11315/972/7057/7852/6647/2149/7311/9261/1950/5575/5573/5606/27347/7295/6850/56034/4217/5577/10961/1326/5607/7867/1647/7786/8428/6416/253260/51347/5291/6352/8517/10892/1616/7334/10454/6714/57498/28988/5604/8767/114609/4750/5594/51719/5062/5595/3146/23394/959/142679/10920/8567/5590/9175/2621	56
GOTERM_BP	GO:0043547	positive regulation of GTPase activity	67/1957	405/18493	0.000141233	0.00432718	3688/6001/397/30851/3987/23603/2664/9910/93663/2149/23365/8301/8853/79658/5910/55843/257106/10507/50848/1983/2665/395/64407/64786/51306/23527/6251/64333/5922/9743/6352/23216/51735/858/81565/23637/5903/10125/2776/9938/10982/117289/1856/9459/8394/729873/4983/134957/5998/23161/10484/727851/79735/8502/54453/1121/6358/8874/9779/11138/10059/8131/26037/27352/255520/729540/55188	67
GOTERM_BP	GO:1901990	regulation of mitotic cell cycle phase transition	63/1957	375/18493	0.000141623	0.00432718	7277/896/203068/8655/1069/10383/8766/351/301/7846/6154/8555/5720/51065/5933/25793/5577/51433/9337/25904/1869/3276/4303/3398/54820/5925/5885/10540/1647/5569/472/10217/55125/1112/51347/5087/55031/81853/891/5108/8697/29883/29766/5962/11073/7175/4848/55781/2273/1017/9314/5591/60561/8452/8556/4204/9735/9787/54930/11065/677/328/3320	63
GOTERM_BP	GO:0031647	regulation of protein stability	48/1957	265/18493	0.00014171	0.00432718	2316/2597/1191/6135/23515/11315/5476/54918/55294/6201/2319/22948/25793/2934/3312/9349/51701/10574/11261/11235/7917/10694/57805/4000/8239/55031/64844/6125/3920/6714/2776/3397/51125/3064/5594/9736/55278/23032/11140/6622/5591/79612/8452/91949/902/6477/3320/1370	48
GOTERM_BP	GO:0043123	positive regulation of I-kappaB kinase/NF-kappaB signaling	36/1957	181/18493	0.000141826	0.00432718	2316/57153/2280/387/972/2534/80762/1936/54386/834/2149/114769/6283/5494/57708/948/56674/3162/27032/389/57162/8517/10892/1499/7334/10475/51026/1653/51135/170506/8767/114609/5536/841/5966/22954	36
GOTERM_BP	GO:1900034	regulation of cellular response to heat	14/1957	45/18493	0.00014749	0.00447645	10049/9261/573/3312/57805/472/3297/3281/26973/5594/5595/51501/26353/3320	14
GOTERM_BP	GO:0043484	regulation of RNA splicing	29/1957	135/18493	0.000154249	0.00463679	6207/4154/3178/9588/708/6431/55796/7072/10521/3312/27339/9939/27316/5936/22927/23064/5725/83989/6651/4686/91746/22938/92906/3187/10772/3181/1655/51755/3192	29
GOTERM_BP	GO:1903146	regulation of autophagy of mitochondrion	13/1957	40/18493	0.000154373	0.00463679	2017/11315/706/55294/25793/665/9927/664/3064/11140/27429/23274/10059	13
GOTERM_BP	GO:0043902	positive regulation of multi-organism process	33/1957	162/18493	0.000165128	0.00493426	1072/2597/5478/2040/972/708/8654/654/1025/26986/3312/5578/27243/51652/7251/6352/25978/858/10475/7153/29883/6882/23369/8767/10184/7879/22938/5021/5595/9217/27161/22932/5034	33
GOTERM_BP	GO:0006457	protein folding	41/1957	218/18493	0.000184333	0.00547989	1191/2782/5478/10049/2280/9403/267/972/2781/5204/22948/573/3312/5887/10574/3301/10961/9694/5082/3313/10694/51035/53938/11080/83460/5903/26973/79031/81572/134218/23640/11140/131118/51645/821/6905/100885848/51430/8877/3320/5034	41
GOTERM_BP	GO:0042770	signal transduction in response to DNA damage	28/1957	130/18493	0.000189557	0.00560645	51720/972/6154/8555/6672/51065/754/2885/9337/27339/25904/1869/3276/1647/472/23028/891/9100/64844/29883/9521/4848/1017/5591/60561/1655/387893/10397	28
GOTERM_BP	GO:0048524	positive regulation of viral process	21/1957	86/18493	0.000191323	0.00562995	1072/5478/2040/972/1025/26986/3312/27243/51652/7251/6352/25978/858/10475/7153/29883/6882/7879/22938/9217/5034	21
GOTERM_BP	GO:0007088	regulation of mitotic nuclear division	35/1957	177/18493	0.000196092	0.0057011	896/5037/8555/1950/51433/27243/9555/54461/5925/5885/472/996/25978/51510/891/858/8697/8881/7175/55781/84250/3832/146691/10419/8243/8658/8452/55968/8556/9735/9232/9787/11065/3192/54619	35
GOTERM_BP	GO:1905475	regulation of protein localization to membrane	35/1957	177/18493	0.000196092	0.0057011	3688/7534/2039/1173/60/2040/26119/8766/598/2664/2534/7529/1445/51024/1601/10971/8650/8301/2934/163882/64114/6845/11261/1869/1213/10490/163/7429/23613/841/9419/8417/54434/5590/7533	35
GOTERM_BP	GO:2001244	positive regulation of intrinsic apoptotic signaling pathway	16/1957	57/18493	0.000196691	0.0057011	6135/11315/10134/6188/598/6154/6647/55294/51024/6201/10955/8440/10059/6477/6279/6280	16
GOTERM_BP	GO:0051561	positive regulation of mitochondrial calcium ion concentration	6/1957	10/18493	0.000200708	0.00576435	10134/51024/5910/10367/63933/664	6
GOTERM_BP	GO:0006091	generation of precursor metabolites and energy	75/1957	471/18493	0.000200862	0.00576435	2597/2821/3098/7388/11315/5315/4698/2108/387/7360/83442/83931/3953/10539/4713/5834/56181/1743/2936/5500/4191/7381/9249/5230/54541/4714/23530/4724/283209/128/2820/4718/231/5257/9167/8801/2109/4129/4696/552/5018/2026/3658/891/4706/3421/4702/6834/3572/51167/4200/664/5236/6391/4711/5019/405/4719/57019/1355/6622/2395/79675/3146/10165/4199/4720/55526/55847/4204/4704/29103/2203/440567/7915	75
GOTERM_BP	GO:0072583	clathrin-dependent endocytosis	13/1957	41/18493	0.000204329	0.00580636	1173/1211/1601/8301/1213/9829/1785/5291/163/22876/821/1759/3676	13
GOTERM_BP	GO:0098927	vesicle-mediated transport between endosomal compartments	13/1957	41/18493	0.000204329	0.00580636	4478/1601/5289/51652/6714/23317/5604/5962/29934/5594/7879/5595/64400	13
GOTERM_BP	GO:0051225	spindle assembly	24/1957	105/18493	0.000206907	0.00582253	3796/2316/203068/8766/6188/387/8555/140609/27243/55125/3837/81027/25978/51510/10982/7175/3832/152185/8243/8658/8556/54930/259266/3192	24
GOTERM_BP	GO:1990748	cellular detoxification	24/1957	105/18493	0.000206907	0.00582253	6648/3048/5742/3047/11315/9446/9588/6647/2876/25824/51714/2879/2936/948/10935/23530/128/7001/2098/6415/26034/3049/10516/6280	24
GOTERM_BP	GO:0051298	centrosome duplication	17/1957	63/18493	0.00021255	0.00595243	1069/56890/4869/27243/54820/51652/54461/55125/25978/51510/26973/7514/23032/152185/1017/26005/9851	17
GOTERM_BP	GO:0048024	regulation of mRNA splicing, via spliceosome	23/1957	99/18493	0.000215483	0.00600555	4154/3178/9588/708/6431/55796/7072/10521/3312/27339/9939/27316/5936/5725/83989/6651/4686/91746/22938/10772/3181/1655/3192	23
GOTERM_BP	GO:0008064	regulation of actin polymerization or depolymerization	35/1957	178/18493	0.000219704	0.00609389	2017/1072/2039/120/387/57180/10109/93663/10093/2934/2885/11344/8440/829/7456/9535/9948/10092/10096/9886/253260/136319/6710/10095/10787/10097/7429/274/5341/29766/5962/7114/118/54434/54961	35
GOTERM_BP	GO:0052547	regulation of peptidase activity	71/1957	442/18493	0.000225642	0.00622881	2597/2821/1032/11315/27018/10049/351/6478/5627/10134/6188/387/10550/2534/7057/10653/5037/834/5023/5720/1611/2149/51024/2876/25824/340485/8301/51065/114769/2934/4217/1475/25816/7076/80196/10935/5269/5607/5272/51035/23204/5045/831/55031/3297/5641/6714/5054/7429/274/9451/26355/8767/10542/6197/841/5062/6622/5595/3146/27429/400410/9314/112399/57630/9232/3053/2621/5104/6279/6280	71
GOTERM_BP	GO:0008154	actin polymerization or depolymerization	39/1957	206/18493	0.000226935	0.0062348	2017/1072/2039/120/387/57180/10109/93663/10093/2934/2885/11344/8440/10810/829/395/7456/9535/9948/10092/10096/9886/253260/136319/10006/6710/10095/10787/10097/7429/274/5341/29766/51019/5962/7114/118/54434/54961	39
GOTERM_BP	GO:0043087	regulation of GTPase activity	76/1957	481/18493	0.000233458	0.00638376	56882/3688/6001/397/30851/3987/23603/2664/9910/6647/93663/2149/23365/8301/8853/79658/5910/55843/257106/10507/221472/10959/50848/1983/2665/395/64407/64786/51306/23527/6251/64333/5147/253260/5922/9743/6352/23216/51735/858/81565/23637/5903/10125/2776/9938/10982/117289/1856/5592/9459/5962/8394/729873/4983/134957/5998/23161/10484/727851/79735/8502/54453/1121/6358/8874/9779/11138/10059/8131/26037/5747/…	76
GOTERM_BP	GO:0030832	regulation of actin filament length	35/1957	179/18493	0.000245827	0.00669042	2017/1072/2039/120/387/57180/10109/93663/10093/2934/2885/11344/8440/829/7456/9535/9948/10092/10096/9886/253260/136319/6710/10095/10787/10097/7429/274/5341/29766/5962/7114/118/54434/54961	35
GOTERM_BP	GO:0071243	cellular response to arsenic-containing substance	8/1957	18/18493	0.000255511	0.00692149	3178/9446/3162/90637/79752/1616/3297/170506	8
GOTERM_BP	GO:0046034	ATP metabolic process	45/1957	250/18493	0.000260231	0.00697893	2597/2821/3098/7388/11315/5315/4698/387/706/4713/3312/7381/5230/54541/4714/4724/283209/4718/9167/4696/2026/891/4706/4702/6834/5236/6391/4711/7114/405/2987/4719/272/1355/6622/2395/10165/10059/4720/55526/4204/4704/29103/2203/440567	45
GOTERM_BP	GO:0010257	NADH dehydrogenase complex assembly	17/1957	64/18493	0.000261243	0.00697893	25915/4698/4713/4714/4724/54539/4718/51300/4696/5018/4706/4702/4711/4719/55863/4720/4704	17
GOTERM_BP	GO:0032981	mitochondrial respiratory chain complex I assembly	17/1957	64/18493	0.000261243	0.00697893	25915/4698/4713/4714/4724/54539/4718/51300/4696/5018/4706/4702/4711/4719/55863/4720/4704	17
GOTERM_BP	GO:1904951	positive regulation of establishment of protein localization	70/1957	437/18493	0.000270563	0.00719473	2316/7534/2597/2821/3098/5478/2752/7292/8655/2040/54741/10134/998/2534/4946/7529/834/2149/55294/51024/22948/10971/654/94121/6850/51160/163882/640/10574/5494/11261/2746/1869/5532/11235/10694/7251/24145/79752/914/9520/8764/51128/58480/5108/10125/6714/7424/22885/170506/5019/8767/3133/7175/5594/55781/952/3495/841/5595/29085/3146/27429/2268/10059/5715/22902/5590/7533/2621	70
GOTERM_BP	GO:0002262	myeloid cell homeostasis	30/1957	146/18493	0.000273426	0.00723768	2821/2039/25893/301/6218/80739/83700/6647/2113/2539/116151/3276/3313/3162/3398/5925/6886/6208/54977/5291/3658/4352/29766/118/405/272/3146/8861/677/4522	30
GOTERM_BP	GO:0071985	multivesicular body sorting pathway	11/1957	32/18493	0.000283113	0.00742976	54741/94121/51160/5874/27243/51652/84313/25978/51510/5873/55353	11
GOTERM_BP	GO:0031023	microtubule organizing center organization	28/1957	133/18493	0.000283246	0.00742976	1069/8409/56890/4869/117178/27243/54820/51652/54461/1647/55125/23122/25978/51510/5108/81565/1499/26973/7514/54875/23032/3832/152185/1017/55968/26005/54930/9851	28
GOTERM_BP	GO:0034250	positive regulation of cellular amide metabolic process	29/1957	140/18493	0.000297335	0.00776419	1191/6203/8531/351/387/7057/6154/708/4869/8301/51065/26986/3184/23107/8440/8872/8663/6352/6125/22927/56339/170506/113251/8439/440275/5594/1994/57409/5595	29
GOTERM_BP	GO:1903322	positive regulation of protein modification by small protein conjugation or removal	27/1957	127/18493	0.000305589	0.00794377	2280/9111/80762/8555/55294/754/1025/7337/648/57162/23028/54472/10892/54165/64844/7334/25898/8767/150684/405/23640/10401/7965/8452/8877/11065/23142	27
GOTERM_BP	GO:0033108	mitochondrial respiratory chain complex assembly	22/1957	95/18493	0.000307268	0.00794377	25915/4698/4713/7019/7381/4714/4724/54539/4718/51300/4696/5018/4706/4702/6834/4711/4719/55863/4720/4704/493753/57001	22
GOTERM_BP	GO:0051701	interaction with host	39/1957	209/18493	0.000308323	0.00794377	3688/2597/5478/3690/80145/598/972/7852/2934/11059/2885/2060/27243/50848/51652/5272/7251/3836/8764/3837/57187/25978/858/1499/10475/6714/79872/440275/7879/841/55770/9217/1380/8106/6504/22954/5034/735/2621	39
GOTERM_BP	GO:0032418	lysosome localization	17/1957	65/18493	0.000319333	0.00819104	55004/6813/6850/6845/3162/27040/81565/10125/54785/8773/79036/8832/2268/57102/23557/23207/25940	17
GOTERM_BP	GO:0007052	mitotic spindle organization	24/1957	108/18493	0.000324532	0.00821371	3796/2316/8766/387/8555/3925/27243/1213/10540/55125/3837/23122/25978/51510/891/7175/3832/152185/6905/8243/8658/8556/4204/3192	24
GOTERM_BP	GO:0010833	telomere maintenance via telomere lengthening	20/1957	83/18493	0.000325427	0.00821371	3178/54386/22948/140609/3183/10574/10694/472/1499/6714/170506/5594/5595/8658/5981/3181/9887/3192/25913/3320	20
GOTERM_BP	GO:1901653	cellular response to peptide	59/1957	356/18493	0.000326765	0.00821371	4149/896/54741/351/5315/5872/9550/5908/9296/2534/529/1445/51024/5575/5573/51094/51274/1442/11031/760/2885/5577/9349/1979/948/10890/4303/353/143686/1176/231/4790/2308/51510/858/81565/9181/3297/5641/9663/51762/6714/3397/8767/1443/64397/94056/10603/9314/5591/5747/8914/2887/677/2805/5590/328/83990/1154	59
GOTERM_BP	GO:0007004	telomere maintenance via telomerase	18/1957	71/18493	0.000327302	0.00821371	3178/54386/22948/140609/3183/10574/10694/472/1499/6714/5594/5595/8658/5981/9887/3192/25913/3320	18
GOTERM_BP	GO:1903051	negative regulation of proteolysis involved in cellular protein catabolic process	18/1957	71/18493	0.000327302	0.00821371	6135/11345/11315/258010/6201/9349/7917/57805/51035/80011/4534/64844/6125/55432/79031/4983/23274/51322	18
GOTERM_BP	GO:0051560	mitochondrial calcium ion homeostasis	9/1957	23/18493	0.000334947	0.00836935	10134/51024/5910/10367/91689/55013/309/63933/664	9
GOTERM_BP	GO:0060249	anatomical structure homeostasis	68/1957	425/18493	0.000339486	0.00844636	71/3690/11171/8366/60/3178/8367/1182/54386/6647/8363/5023/56890/6672/2149/1445/282809/22948/3988/27347/580/140609/6850/8365/7515/760/3184/1200/5578/3183/10574/5230/51542/10694/5925/231/472/10000/5422/4534/25978/1499/3920/6714/84959/57804/170506/5594/118/952/7486/5595/134430/25937/8861/1763/5591/8658/64081/5981/9657/3181/9887/3192/25913/328/22954/3320	68
GOTERM_BP	GO:0007159	leukocyte cell-cell adhesion	55/1957	327/18493	0.000352724	0.00871571	3688/4478/6403/9402/7292/6188/301/387/9750/972/998/2534/80762/8654/1445/54542/2319/5573/961/6850/2113/83706/2885/10507/8440/1326/9092/8764/57162/79626/57045/6352/10892/64844/3109/10125/3572/6714/10673/8767/3133/1947/5062/912/3146/959/9314/160365/7525/8876/84695/3676/5590/6279/6280	55
GOTERM_BP	GO:0006909	phagocytosis	57/1957	342/18493	0.000353319	0.00871571	56882/3688/71/3690/60/23603/51411/301/998/2534/7057/27102/10109/3953/1445/56990/10093/961/6850/196527/2934/100423062/2885/6845/948/375033/7456/5795/10092/10096/9886/2214/51552/10006/1785/5291/26228/10095/10787/10097/6714/9938/5873/917/5594/8394/9844/3495/7879/5595/3146/2268/7525/5747/6504/3320/2621	57
GOTERM_BP	GO:1903706	regulation of hemopoiesis	67/1957	418/18493	0.00035536	0.0087289	4778/8366/7292/25893/3674/301/8367/387/972/7057/80762/6647/8363/55294/54542/27086/10398/22806/25793/6850/2113/8365/2551/760/2811/5578/116151/3276/3313/4211/3398/23112/5925/11051/6886/914/9092/8357/10892/10125/115352/1499/4853/4352/56339/80349/84959/5196/170506/3020/8767/405/841/10401/5814/3146/8861/54517/4297/57630/8876/84695/677/6929/5590/714/2621	67
GOTERM_BP	GO:0050863	regulation of T cell activation	52/1957	305/18493	0.000361996	0.00884144	9402/7292/6188/301/387/9750/972/998/2534/80762/6647/8654/1445/54542/2319/5573/961/6850/2934/2885/8440/1326/27040/914/9092/8764/57162/79626/57045/6352/10892/64844/3109/10125/1499/3572/6714/56339/10673/8767/3133/1947/5062/912/3146/959/160365/7525/57630/8876/84695/5590	52
GOTERM_BP	GO:0002433	immune response-regulating cell surface receptor signaling pathway involved in phagocytosis	28/1957	135/18493	0.000366579	0.00884144	71/60/998/2534/10109/10093/961/6850/2885/7456/5795/10092/10096/2214/10006/5291/10095/10787/10097/6714/917/5594/9844/5595/2268/7525/5747/3320	28
GOTERM_BP	GO:0038096	Fc-gamma receptor signaling pathway involved in phagocytosis	28/1957	135/18493	0.000366579	0.00884144	71/60/998/2534/10109/10093/961/6850/2885/7456/5795/10092/10096/2214/10006/5291/10095/10787/10097/6714/917/5594/9844/5595/2268/7525/5747/3320	28
GOTERM_BP	GO:0043405	regulation of MAP kinase activity	56/1957	335/18493	0.000367067	0.00884144	5154/6188/3611/972/7057/7852/6647/8654/2149/1445/7311/9261/1950/27250/5606/11213/27347/6850/56034/4217/6283/221472/3301/10961/64853/11235/1326/5607/7251/5795/7867/1647/7786/9839/6416/51347/5291/8517/1616/10125/7334/10454/6714/57498/28988/1856/5604/8767/5594/5998/5595/959/142679/51755/8567/9175	56
GOTERM_BP	GO:0034614	cellular response to reactive oxygen species	32/1957	162/18493	0.000367567	0.00884144	6648/11315/5660/6188/301/3934/6647/25824/7295/2113/4217/3184/948/10935/11235/7001/2308/1785/3297/6714/23064/664/5536/5594/2395/5595/1017/9314/5151/59338/328/10516	32
GOTERM_BP	GO:0022407	regulation of cell-cell adhesion	63/1957	388/18493	0.000369749	0.00884408	53827/928/2039/239/9402/7292/6188/301/387/9750/972/998/2534/10653/80762/8654/1445/54542/2319/5573/961/6850/2113/83706/2885/5578/22920/8440/1326/5607/9092/8764/57162/79626/57045/6352/10892/64844/3109/10125/3572/6714/56339/84959/10673/5592/5962/8767/3133/1947/201627/5062/912/3146/959/9314/160365/7525/5747/8876/84695/3676/5590	63
GOTERM_BP	GO:0090307	mitotic spindle assembly	16/1957	60/18493	0.000374129	0.00884408	3796/2316/8766/387/8555/27243/55125/3837/25978/51510/7175/3832/152185/8243/8556/3192	16
GOTERM_BP	GO:1903902	positive regulation of viral life cycle	16/1957	60/18493	0.000374129	0.00884408	5478/2040/972/26986/3312/27243/51652/7251/6352/25978/858/10475/7153/29883/9217/5034	16
GOTERM_BP	GO:0031398	positive regulation of protein ubiquitination	24/1957	109/18493	0.000375097	0.00884408	2280/9111/80762/8555/55294/754/1025/7337/648/57162/23028/10892/54165/64844/7334/25898/8767/150684/23640/7965/8452/8877/11065/23142	24
GOTERM_BP	GO:0072378	blood coagulation, fibrin clot formation	10/1957	28/18493	0.000375305	0.00884408	2162/2815/2814/708/2811/7450/2155/2147/2159/2157	10
GOTERM_BP	GO:1902903	regulation of supramolecular fiber organization	57/1957	343/18493	0.000381036	0.00894277	2316/2017/1072/1191/2039/11315/351/120/6188/387/57180/998/10109/93663/2876/10093/961/2934/58497/3925/57606/2885/3312/11344/8440/829/395/5925/7456/9535/9948/10092/389/10096/9886/253260/136319/23122/6710/10095/10787/9181/10097/7429/58526/274/5341/3397/29766/5962/7114/118/6622/26586/54434/4204/54961	57
GOTERM_BP	GO:0006891	intra-Golgi vesicle-mediated transport	11/1957	33/18493	0.000384383	0.00896951	11345/1315/27095/1523/8775/9276/100128327/51560/10490/7109/57511	11
GOTERM_BP	GO:1903363	negative regulation of cellular protein catabolic process	20/1957	84/18493	0.000385269	0.00896951	6135/11345/11315/258010/6201/9349/7917/57805/51035/80011/5045/4534/64844/6125/55432/55353/79031/4983/23274/51322	20
GOTERM_BP	GO:0034504	protein localization to nucleus	47/1957	269/18493	0.000387857	0.00899363	2316/6135/23515/11315/10049/2534/6672/11142/22948/754/7295/580/6850/2533/9349/10574/11261/948/10694/4000/200576/3836/5569/23607/3837/5903/6714/9818/9451/55746/7514/54971/7175/5594/23633/7486/3087/10526/727851/8720/51501/10445/129401/3192/729540/2147/2621	47
GOTERM_BP	GO:0051346	negative regulation of hydrolase activity	72/1957	458/18493	0.000390898	0.00902553	56882/2597/2821/1032/11315/27018/10049/351/6478/5627/301/2280/7057/10653/5037/10776/3953/2876/25824/94274/8301/8725/114769/261726/163882/1475/25816/7076/10507/10959/2029/50848/11261/80196/10935/5269/5607/5272/51035/23204/5147/55125/5045/831/55031/5018/54899/6059/64062/6714/5054/7429/274/5962/4331/10542/6197/63892/5062/6622/9314/1266/55105/636/57630/9232/90853/5590/57082/3053/2621/5104	72
GOTERM_BP	GO:0006278	RNA-dependent DNA biosynthetic process	19/1957	78/18493	0.000392346	0.00902553	5478/3178/54386/22948/140609/3183/10574/10694/472/1499/6714/5594/5595/8658/5981/9887/3192/25913/3320	19
GOTERM_BP	GO:0051016	barbed-end actin filament capping	8/1957	19/18493	0.000400531	0.0091054	120/2934/11344/829/136319/7429/5962/118	8
GOTERM_BP	GO:0098884	postsynaptic neurotransmitter receptor internalization	8/1957	19/18493	0.000400531	0.0091054	26052/3690/8650/2060/1785/163/4983/1759	8
GOTERM_BP	GO:0140239	postsynaptic endocytosis	8/1957	19/18493	0.000400531	0.0091054	26052/3690/8650/2060/1785/163/4983/1759	8
GOTERM_BP	GO:0043122	regulation of I-kappaB kinase/NF-kappaB signaling	41/1957	226/18493	0.00040406	0.00914975	2316/57153/2280/387/972/2534/80762/1936/54386/834/54469/2149/114769/6283/5494/57708/948/56674/3162/27032/389/84270/57162/8517/10892/9100/1499/7334/10475/51026/8904/1653/51135/170506/8767/114609/5536/841/5966/5495/22954	41
GOTERM_BP	GO:1902749	regulation of cell cycle G2/M phase transition	33/1957	170/18493	0.000417397	0.00938076	7277/51720/203068/8655/1069/10383/8766/351/7846/8555/4869/5577/4303/9555/54820/5885/10540/5569/472/55125/1112/51347/5087/55031/891/5108/11073/2273/1017/60561/4204/54930/3320	33
GOTERM_BP	GO:0048872	homeostasis of number of cells	44/1957	248/18493	0.00041797	0.00938076	1831/2821/2039/25893/301/6218/80739/83700/972/6647/2149/29985/54542/3988/30061/2113/2539/116151/5532/3276/51542/3313/3162/3398/5925/6886/27040/6208/10000/54977/5291/3658/4352/29766/10673/118/405/272/3146/8861/10603/7543/677/4522	44
GOTERM_BP	GO:1903008	organelle disassembly	22/1957	97/18493	0.000419116	0.00938076	2017/81631/11345/11315/706/55294/51024/7443/25793/665/9927/8562/79752/664/3064/493856/11140/27429/23274/10059/643246/53918	22
GOTERM_BP	GO:0006839	mitochondrial transport	43/1957	241/18493	0.000427176	0.00952438	7534/54741/598/1374/706/7529/55294/51024/10971/25793/665/7263/10367/91689/1869/9927/55013/63933/9520/401505/54977/58480/29957/22885/664/58526/23456/4285/10948/841/131118/8034/27429/10165/100652748/3308/26517/57380/29103/10531/54332/3320/7533	43
GOTERM_BP	GO:0006406	mRNA export from nucleus	24/1957	110/18493	0.000432447	0.0095683	80145/6431/23279/7884/7307/9939/57187/84324/5903/26019/9818/55746/53981/7175/4686/91746/3087/1977/3181/129401/11269/55706/9887/8106	24
GOTERM_BP	GO:0071427	mRNA-containing ribonucleoprotein complex export from nucleus	24/1957	110/18493	0.000432447	0.0095683	80145/6431/23279/7884/7307/9939/57187/84324/5903/26019/9818/55746/53981/7175/4686/91746/3087/1977/3181/129401/11269/55706/9887/8106	24
GOTERM_BP	GO:0090303	positive regulation of wound healing	15/1957	55/18493	0.00043463	0.00958004	2039/6403/301/4638/7057/2149/6915/196527/948/5054/5341/10855/3146/2155/2147	15
GOTERM_BP	GO:0050852	T cell receptor signaling pathway	30/1957	150/18493	0.000443657	0.00974196	10666/9402/3123/6188/2534/1445/54542/3122/121665/3118/2533/11119/5795/27040/1997/4790/3117/5291/8517/10892/11118/7334/3119/917/8767/5594/5062/29085/7006/1967	30
GOTERM_BP	GO:1904356	regulation of telomere maintenance via telomere lengthening	16/1957	61/18493	0.000457985	0.0100186	3178/22948/140609/3183/10574/10694/472/1499/6714/170506/5594/5595/8658/3181/3192/25913	16
GOTERM_BP	GO:0032204	regulation of telomere maintenance	19/1957	79/18493	0.000466105	0.0101579	3178/54386/22948/140609/7515/3184/3183/10574/10694/472/1499/6714/170506/5594/5595/8658/3181/3192/25913	19
GOTERM_BP	GO:0030032	lamellipodium assembly	17/1957	67/18493	0.000469706	0.0101981	29780/3688/7414/2039/64805/998/10109/11344/8440/10810/1785/10787/22885/9459/8874/54434/54961	17
GOTERM_BP	GO:0034110	regulation of homotypic cell-cell adhesion	9/1957	24/18493	0.000485885	0.01051	928/2039/239/6850/5578/6352/84959/5592/5962	9
GOTERM_BP	GO:0030834	regulation of actin filament depolymerization	14/1957	50/18493	0.000499428	0.0106833	1072/2039/120/2934/11344/829/9948/136319/6710/7429/5341/29766/5962/118	14
GOTERM_BP	GO:0032655	regulation of interleukin-12 production	14/1957	50/18493	0.000499428	0.0106833	7292/7057/708/27086/11213/961/948/4790/8767/114609/3146/959/6504/3663	14
GOTERM_BP	GO:1902369	negative regulation of RNA catabolic process	14/1957	50/18493	0.000499428	0.0106833	4904/8531/10140/9261/26986/3184/3183/1869/10128/51594/170506/114609/1994/3192	14
GOTERM_BP	GO:0031570	DNA integrity checkpoint	31/1957	158/18493	0.000508054	0.0108279	51720/6154/8555/51065/261726/9337/27339/25904/1869/3276/4303/57805/1647/472/1112/51347/891/7153/29883/11073/4848/440275/1017/1763/5591/60561/8914/51322/5810/9575/83990	31
GOTERM_BP	GO:0032212	positive regulation of telomere maintenance via telomerase	11/1957	34/18493	0.000514365	0.0109223	3178/22948/140609/10574/10694/472/1499/5594/5595/8658/25913	11
GOTERM_BP	GO:0031668	cellular response to extracellular stimulus	45/1957	258/18493	0.000529693	0.0112067	4149/7392/81631/11345/2752/3178/64805/25994/3934/2534/6647/1611/5289/10634/4217/3312/3162/143686/8428/2308/552/64121/3658/3297/3920/53335/9451/440275/5594/23032/7486/22938/5595/5287/23394/23274/8658/10059/8131/54434/643246/29103/54332/83990/2621	45
GOTERM_BP	GO:0038094	Fc-gamma receptor signaling pathway	28/1957	138/18493	0.000532161	0.011218	71/60/998/2534/10109/10093/961/6850/2885/7456/5795/10092/10096/2214/10006/5291/10095/10787/10097/6714/917/5594/9844/5595/2268/7525/5747/3320	28
GOTERM_BP	GO:0016197	endosomal transport	38/1957	208/18493	0.000561104	0.0116909	55004/8766/54741/5872/9784/54918/7311/30845/8301/6642/6643/51160/2060/27243/27131/10890/51542/51652/84313/7251/1213/200576/738/51560/51552/25978/10490/22836/63893/55353/7109/7879/22876/23274/79735/9779/57182/55610	38
GOTERM_BP	GO:0032271	regulation of protein polymerization	38/1957	208/18493	0.000561104	0.0116909	2017/2039/120/6188/387/57180/10109/93663/10093/2934/58497/3925/57606/2885/11344/8440/829/7417/7456/9535/10092/10096/9886/253260/136319/6710/10095/10787/10097/7429/274/29766/5962/7114/118/6622/4204/3320	38
GOTERM_BP	GO:0000422	autophagy of mitochondrion	18/1957	74/18493	0.000562665	0.0116909	2017/81631/11345/11315/706/55294/51024/25793/665/9927/664/3064/493856/11140/27429/23274/10059/643246	18
GOTERM_BP	GO:0061726	mitochondrion disassembly	18/1957	74/18493	0.000562665	0.0116909	2017/81631/11345/11315/706/55294/51024/25793/665/9927/664/3064/493856/11140/27429/23274/10059/643246	18
GOTERM_BP	GO:0008631	intrinsic apoptotic signaling pathway in response to oxidative stress	13/1957	45/18493	0.000565677	0.0117115	6648/11315/10550/6647/55294/2876/4217/11235/8428/27429/5163/8876/5034	13
GOTERM_BP	GO:0051783	regulation of nuclear division	37/1957	201/18493	0.000567832	0.0117143	896/5037/8555/1950/5573/51433/27243/9555/54461/5925/5885/472/996/25978/51510/891/858/8697/8881/7175/55781/84250/3832/146691/10419/8243/8658/8452/55968/8556/9735/9232/9787/11065/3192/5810/54619	37
GOTERM_BP	GO:0050730	regulation of peptidyl-tyrosine phosphorylation	43/1957	245/18493	0.000609137	0.0125219	2039/3690/5154/351/55024/972/2534/55294/1950/6850/56034/1442/10507/8440/948/9467/84313/7251/5795/6886/8764/253260/10006/5912/6352/26228/9181/3297/3572/6714/29883/1856/8767/1443/79031/5062/22876/23394/7006/7525/84632/5590/2621	43
GOTERM_BP	GO:0043244	regulation of protein complex disassembly	23/1957	106/18493	0.000611967	0.0125356	1072/2039/120/11213/2934/11344/829/9948/10241/136319/23122/6710/9181/23064/664/7429/58526/5341/29766/5962/118/23274/26586	23
GOTERM_BP	GO:0031667	response to nutrient levels	74/1957	481/18493	0.000619922	0.0126538	4149/7392/81631/1032/11345/6678/29937/2752/3178/5315/64805/25994/3934/11167/2534/27102/706/79718/6647/5023/1603/1611/51024/5289/6915/10634/2539/2934/1442/4217/3312/79602/2029/4303/23530/3162/3157/24145/143686/8428/2308/8443/2730/64121/3658/3297/3920/6714/4524/53335/9451/5019/440275/1443/5594/23032/7486/22938/5595/5287/6532/23274/8658/9779/10059/8131/54434/643246/29103/54332/83990/2155/2621/5444	74
GOTERM_BP	GO:0032206	positive regulation of telomere maintenance	14/1957	51/18493	0.000622201	0.0126558	3178/22948/140609/3184/10574/10694/472/1499/170506/5594/5595/8658/3181/25913	14
GOTERM_BP	GO:0006119	oxidative phosphorylation	26/1957	126/18493	0.000633242	0.0128353	7388/11315/4698/387/4713/7381/4714/4724/4718/9167/4696/891/4706/4702/6834/6391/4711/4719/1355/6622/2395/4720/4204/4704/29103/440567	26
GOTERM_BP	GO:0070997	neuron death	55/1957	335/18493	0.000644302	0.013014	4149/6648/2597/2821/1191/11315/351/3611/598/387/998/2534/6647/2149/55294/51024/2876/112398/8301/25793/2539/4217/9040/54541/11261/3162/5925/22800/7786/472/6416/2730/84280/6352/8517/1616/1499/3297/5641/163/664/26355/5536/841/6622/5966/27429/23394/7965/112399/54434/4204/84678/6477/8564	55
GOTERM_BP	GO:1901216	positive regulation of neuron death	19/1957	81/18493	0.000650252	0.0130886	1191/387/998/2534/55294/51024/8301/4217/9040/54541/472/6416/1616/1499/841/6622/7965/54434/8564	19
GOTERM_BP	GO:0000288	nuclear-transcribed mRNA catabolic process, deadenylation-dependent decay	18/1957	75/18493	0.000668248	0.0134043	10140/51013/26986/219988/9337/25904/9652/23112/27258/27257/197135/29883/80349/170506/80153/4848/27161/677	18
GOTERM_BP	GO:0045727	positive regulation of translation	25/1957	120/18493	0.000688203	0.0137569	6203/8531/387/7057/6154/708/4869/51065/26986/3184/23107/8440/8872/8663/6352/6125/22927/56339/170506/113251/440275/5594/1994/57409/5595	25
GOTERM_BP	GO:0033157	regulation of intracellular protein transport	41/1957	232/18493	0.00069899	0.0139246	2316/2039/11315/2040/54741/10134/2664/258010/998/2534/4946/6672/55294/11142/51024/3638/7295/580/665/6845/5494/11261/948/11235/79752/9520/5569/51128/58480/5108/81565/55432/22885/9818/7514/7175/5594/55781/27429/22902/2621	41
GOTERM_BP	GO:0031623	receptor internalization	23/1957	107/18493	0.000702846	0.0139524	3688/26052/928/3690/1173/26119/1950/8650/8301/6642/6850/967/11031/2885/2060/948/1213/1785/163/4983/6622/9779/1759	23
GOTERM_BP	GO:1905476	negative regulation of protein localization to membrane	10/1957	30/18493	0.000705204	0.0139524	2039/1173/598/2664/1445/1601/8650/8301/64114/1213	10
GOTERM_BP	GO:0070507	regulation of microtubule cytoskeleton organization	33/1957	175/18493	0.000711941	0.0140122	1069/6188/387/56890/4869/58497/3925/23299/348235/57606/27243/51652/54461/1213/23122/25978/51510/9181/1499/10982/58526/26973/7514/7175/3832/6622/152185/8243/55968/26586/636/4204/3192	33
GOTERM_BP	GO:0002474	antigen processing and presentation of peptide antigen via MHC class I	13/1957	46/18493	0.000713057	0.0140122	10134/6892/948/50856/51128/8517/4012/8773/3133/10484/821/3134/10427	13
GOTERM_BP	GO:0032535	regulation of cellular component size	59/1957	367/18493	0.000718986	0.014081	2017/1072/4478/2039/1173/8766/120/3611/2664/387/57180/1182/10109/93663/10093/8301/7504/196527/1808/2934/2885/10507/11344/8440/23111/829/7456/9535/9948/10092/10096/9886/10000/253260/136319/23028/1785/6710/81565/10095/10787/10097/7429/274/5341/55144/3475/29766/5962/7114/118/10542/134430/23394/6259/54434/22902/54961/9175	59
GOTERM_BP	GO:0051403	stress-activated MAPK cascade	48/1957	284/18493	0.000726223	0.0141748	351/6188/10550/998/7311/9261/27250/5606/6850/4217/221472/3301/4077/3276/64853/11235/1326/1647/5859/7786/9839/6416/4790/2308/51347/8517/1616/10125/7334/10454/28988/1856/51135/5604/9459/8767/114609/10987/5594/5595/3146/959/142679/57630/285613/677/6504/9175	48
GOTERM_BP	GO:0044839	cell cycle G2/M phase transition	39/1957	218/18493	0.000730602	0.0141908	7277/805/51720/203068/8655/1069/10383/8766/351/7846/8555/10776/4869/219771/5577/2029/4303/9555/54820/5885/10540/5569/472/55125/1112/51347/5087/55031/1785/891/5108/6873/11073/2273/1017/60561/4204/54930/3320	39
GOTERM_BP	GO:0061684	chaperone-mediated autophagy	6/1957	12/18493	0.000731941	0.0141908	1191/5476/3312/3920/6622/3320	6
GOTERM_BP	GO:0006900	vesicle budding from membrane	22/1957	101/18493	0.000753092	0.0145039	58485/26052/1173/8301/3638/10959/22870/27095/8775/51128/1785/5537/4905/6399/7109/7879/10484/9217/8452/1759/10427/2157	22
GOTERM_BP	GO:0098869	cellular oxidant detoxification	22/1957	101/18493	0.000753092	0.0145039	6648/3048/5742/3047/11315/9446/9588/6647/2876/25824/51714/2879/2936/948/10935/23530/7001/6415/26034/3049/10516/6280	22
GOTERM_BP	GO:0097194	execution phase of apoptosis	19/1957	82/18493	0.000763767	0.0146608	6188/598/834/80196/3836/8428/3837/3005/3297/7153/162989/841/5062/3146/27429/400410/10059/9941/8567	19
GOTERM_BP	GO:0032615	interleukin-12 production	14/1957	52/18493	0.000769616	0.0147243	7292/7057/708/27086/11213/961/948/4790/8767/114609/3146/959/6504/3663	14
GOTERM_BP	GO:0045637	regulation of myeloid cell differentiation	43/1957	248/18493	0.000787803	0.0150227	4778/8366/25893/3674/8367/972/7057/80762/8363/55294/27086/10398/2113/8365/2551/760/2811/5578/116151/3276/3313/4211/3398/23112/5925/6886/8357/1499/4853/4352/80349/84959/5196/3020/405/841/10401/5814/3146/8861/4297/677/714	43
GOTERM_BP	GO:0030521	androgen receptor signaling pathway	17/1957	70/18493	0.000807832	0.0153476	11315/387/1601/27086/10521/8031/3301/5925/29079/8202/1616/1499/90390/7041/8896/51389/1655	17
GOTERM_BP	GO:0007050	cell cycle arrest	42/1957	241/18493	0.000810653	0.0153476	1032/6009/1982/55004/3611/7057/6154/8555/10634/580/1025/9349/5494/9337/25904/1869/3276/4303/3398/5925/7251/8872/1647/472/64121/891/4853/29883/274/5604/4848/440275/51719/10542/26959/5565/1017/8452/8556/28227/27352/2621	42
GOTERM_BP	GO:1903036	positive regulation of response to wounding	16/1957	64/18493	0.000812782	0.0153476	2039/6403/301/4638/7057/2149/6915/196527/948/81565/5054/5341/10855/3146/2155/2147	16
GOTERM_BP	GO:0051098	regulation of binding	59/1957	369/18493	0.000824246	0.0155135	805/6135/11315/60/26119/351/2280/9750/267/6672/55294/1601/1950/7295/121665/1025/114769/3925/4087/948/1869/64853/3162/3398/5925/5516/8663/80011/9236/23028/1499/3005/3297/22927/6714/8904/84959/3397/7114/8767/114609/118/51185/4686/23032/23383/5595/3146/94056/64400/23394/9314/8658/23557/8874/5092/3676/4242/5444	59
GOTERM_BP	GO:0009199	ribonucleoside triphosphate metabolic process	48/1957	286/18493	0.000849359	0.0159344	2597/2821/3098/7388/11315/5315/3615/4698/387/706/4713/3312/7381/5230/54541/4714/4724/283209/4718/9167/4696/2026/891/4706/4702/6834/5236/6391/4711/7114/405/2987/4719/272/1355/6622/2395/10165/56474/10059/4720/55526/3704/4204/4704/29103/2203/440567	48
GOTERM_BP	GO:0030518	intracellular steroid hormone receptor signaling pathway	28/1957	142/18493	0.0008531	0.015953	11315/81606/387/1601/112398/27086/7337/10521/8031/3301/9325/5925/29966/29079/8202/51569/1616/1499/90390/6714/7041/5536/4848/8896/51389/1655/9575/7533	28
GOTERM_BP	GO:0043112	receptor metabolic process	34/1957	184/18493	0.000866699	0.0161552	3688/26052/928/3690/1173/55004/823/26119/1211/30845/1950/8650/8301/6642/6850/2530/967/11031/2885/2060/948/1213/5045/1785/51510/5641/4905/163/4983/6622/22876/9779/1759/54894	34
GOTERM_BP	GO:0046651	lymphocyte proliferation	45/1957	264/18493	0.000872661	0.0162142	4478/896/7292/3615/6188/301/972/2534/80762/8654/54542/5573/22806/3251/6850/11119/8440/5532/8764/472/57162/973/57045/931/6352/10892/64844/3109/115352/1499/4352/3572/10673/8767/114609/3133/3070/1947/952/912/3146/959/160365/1380/57630	45
GOTERM_BP	GO:1903362	regulation of cellular protein catabolic process	42/1957	242/18493	0.000882734	0.0163489	4478/1191/6135/11345/11315/10134/258010/5720/55294/2876/1601/6201/1950/754/7337/9349/5887/7917/57805/51035/54467/90637/80011/6613/5045/25897/4534/64844/6125/55432/7110/55353/5962/25898/150684/79031/23640/4983/23274/5747/51322/3320	42
GOTERM_BP	GO:0016556	mRNA modification	8/1957	21/18493	0.000888568	0.0163525	25962/56339/79872/23091/54517/142940/55006/57721	8
GOTERM_BP	GO:0043496	regulation of protein homodimerization activity	8/1957	21/18493	0.000888568	0.0163525	11315/64853/3397/114609/51185/94056/5092/3676	8
GOTERM_BP	GO:2000059	negative regulation of ubiquitin-dependent protein catabolic process	13/1957	47/18493	0.000891441	0.0163534	6135/11315/258010/6201/9349/7917/57805/51035/4534/6125/79031/23274/51322	13
GOTERM_BP	GO:0007032	endosome organization	18/1957	77/18493	0.000931191	0.0169685	55004/8766/1182/5289/51160/27243/51652/84313/7251/25978/51510/5873/55353/23317/7879/5869/64400/1759	18
GOTERM_BP	GO:0072384	organelle transport along microtubule	18/1957	77/18493	0.000931191	0.0169685	25893/998/8409/26258/23299/22920/6845/54820/10128/1176/81565/10125/63915/3064/23557/636/10947/5590	18
GOTERM_BP	GO:0002183	cytoplasmic translational initiation	10/1957	31/18493	0.00094326	0.0169685	8665/1968/51386/1983/8562/8663/8669/5936/56339/27335	10
GOTERM_BP	GO:0030042	actin filament depolymerization	14/1957	53/18493	0.00094546	0.0169685	1072/2039/120/2934/11344/829/9948/136319/6710/7429/5341/29766/5962/118	14
GOTERM_BP	GO:0032210	regulation of telomere maintenance via telomerase	14/1957	53/18493	0.00094546	0.0169685	3178/22948/140609/3183/10574/10694/472/1499/6714/5594/5595/8658/3192/25913	14
GOTERM_BP	GO:0048488	synaptic vesicle endocytosis	14/1957	53/18493	0.00094546	0.0169685	85439/71/26052/801/5874/5532/9829/1785/5533/4983/6622/821/10059/1759	14
GOTERM_BP	GO:0140238	presynaptic endocytosis	14/1957	53/18493	0.00094546	0.0169685	85439/71/26052/801/5874/5532/9829/1785/5533/4983/6622/821/10059/1759	14
GOTERM_BP	GO:0009205	purine ribonucleoside triphosphate metabolic process	47/1957	280/18493	0.000952669	0.0170451	2597/2821/3098/7388/11315/5315/3615/4698/387/706/4713/3312/7381/5230/54541/4714/4724/283209/4718/9167/4696/2026/891/4706/4702/6834/5236/6391/4711/7114/405/2987/4719/272/1355/6622/2395/10165/10059/4720/55526/3704/4204/4704/29103/2203/440567	47
GOTERM_BP	GO:2001056	positive regulation of cysteine-type endopeptidase activity	28/1957	143/18493	0.000955831	0.0170491	27018/10134/6188/387/10550/2534/834/5023/1611/2149/51024/340485/51065/2934/4217/3297/5641/9451/26355/8767/841/6622/3146/27429/400410/112399/6279/6280	28
GOTERM_BP	GO:0043242	negative regulation of protein complex disassembly	17/1957	71/18493	0.00095911	0.0170551	2039/120/11213/2934/11344/829/136319/23122/6710/9181/7429/58526/29766/5962/118/23274/26586	17
GOTERM_BP	GO:0030041	actin filament polymerization	33/1957	178/18493	0.000965552	0.01709	2017/2039/120/387/57180/10109/93663/10093/2934/2885/11344/8440/10810/829/395/7456/9535/10092/10096/9886/253260/136319/6710/10095/10787/10097/7429/274/29766/51019/5962/7114/118	33
GOTERM_BP	GO:0000187	activation of MAPK activity	29/1957	150/18493	0.000966967	0.01709	972/7057/7852/6647/7311/9261/1950/5606/27347/6850/4217/10961/5607/7867/7786/6416/5291/8517/1616/7334/10454/28988/5604/8767/5594/5595/959/8567/9175	29
GOTERM_BP	GO:0006470	protein dephosphorylation	52/1957	318/18493	0.00097707	0.0171547	27071/805/2280/5534/7529/8555/5782/8073/10776/94274/23261/801/121665/8725/261726/5500/151742/5494/2029/22870/5532/5516/5795/9829/5510/10217/4534/5537/151987/115352/10454/8732/84959/3064/8446/5536/11266/5533/5725/26051/5519/201562/29085/142679/64077/8556/54434/28227/11123/9787/54961/5495	52
GOTERM_BP	GO:1903829	positive regulation of cellular protein localization	52/1957	318/18493	0.00097707	0.0171547	2316/3688/7534/4478/11315/2040/8766/54741/10134/998/2534/4946/7529/55294/51024/22948/10971/51160/163882/10574/5494/11261/1869/11235/10694/51104/27020/7251/79752/9520/23607/51128/58480/5108/6714/163/22885/7429/9451/5962/7175/5594/55781/841/27429/54434/636/10445/22902/2147/7533/2621	52
GOTERM_BP	GO:0017038	protein import	38/1957	214/18493	0.000979508	0.0171547	2316/1191/11142/754/7295/6850/2533/3312/9349/11261/948/4000/3836/5569/3837/5903/51762/3920/9818/55746/7175/5594/23633/83752/131118/10526/727851/100652748/8720/3308/26517/51501/129401/29103/8504/729540/3320/2621	38
GOTERM_BP	GO:0098754	detoxification	25/1957	123/18493	0.00100286	0.0175108	6648/3048/5742/3047/11315/9446/9588/6647/2876/25824/51714/2879/2936/948/10935/23530/128/7001/2098/6415/26034/3049/10516/5446/6280	25
GOTERM_BP	GO:0032943	mononuclear cell proliferation	45/1957	266/18493	0.00102436	0.0178002	4478/896/7292/3615/6188/301/972/2534/80762/8654/54542/5573/22806/3251/6850/11119/8440/5532/8764/472/57162/973/57045/931/6352/10892/64844/3109/115352/1499/4352/3572/10673/8767/114609/3133/3070/1947/952/912/3146/959/160365/1380/57630	45
GOTERM_BP	GO:0048285	organelle fission	70/1957	458/18493	0.00102557	0.0178002	3796/2316/896/6152/8766/387/5037/8555/51024/1950/5573/64423/56181/51433/27243/9555/7917/54820/54461/5925/5885/5719/23244/10096/472/55125/996/3837/23122/25978/51510/891/9918/858/81565/10097/3297/8697/7153/664/8881/25936/7175/55781/84250/23383/3832/152185/151246/146691/10419/8243/8658/8452/11144/10059/55968/8556/9735/55706/9232/9787/259266/11065/3192/5810/54332/4437/54619/83990	70
GOTERM_BP	GO:0022604	regulation of cell morphogenesis	72/1957	474/18493	0.00103998	0.0179964	2316/29780/56882/2017/1072/4478/26052/2039/6678/3987/8766/23603/301/3611/2664/387/998/2534/10109/708/93663/56990/7504/55843/1808/10507/11344/6845/221472/23111/10810/9948/389/1523/9839/1785/58480/81565/10097/4352/22836/6714/7429/53335/3397/3475/1856/5604/170506/5962/113251/56965/989/10484/134430/23394/6259/9205/2268/57688/8874/10059/54434/26037/5747/22902/54961/10672/51057/9175/2147/7533	72
GOTERM_BP	GO:0072659	protein localization to plasma membrane	42/1957	244/18493	0.00104405	0.018013	2316/3688/1173/60/26119/8766/340348/5872/598/1445/1601/30845/2319/8650/8301/163882/11031/64114/2533/6845/10959/50848/10890/7871/1213/682/23122/51735/10490/23167/51762/4905/7429/286/51125/57217/5962/8394/8417/84668/5590/2621	42
GOTERM_BP	GO:0050851	antigen receptor-mediated signaling pathway	44/1957	259/18493	0.00106077	0.0182189	10666/9402/3123/6188/2534/1445/974/54542/3122/121665/6850/3118/100423062/2533/640/11119/5795/27040/1997/4790/973/3117/5291/26228/8517/10892/11118/115352/7334/3119/89857/123920/917/8767/5594/952/3495/5062/29085/10603/7006/1967/148823/59338	44
GOTERM_BP	GO:0010948	negative regulation of cell cycle process	50/1957	304/18493	0.00106227	0.0182189	4149/1032/51720/6154/8555/8409/56890/55294/4869/5573/51065/5933/25793/1025/648/9349/23269/9337/27243/25904/1869/3276/4303/9555/5925/5885/1647/472/10217/1112/51347/55031/891/80012/29883/8726/11073/7175/4848/2273/146691/1017/8243/9314/5591/8658/60561/9232/677/5810	50
GOTERM_BP	GO:0007051	spindle organization	31/1957	165/18493	0.00108078	0.0184474	3796/2316/203068/8766/6188/387/8555/140609/3925/27243/1213/10540/55125/3837/81027/23122/25978/51510/891/10982/7175/3832/152185/6905/8243/8658/8556/4204/54930/259266/3192	31
GOTERM_BP	GO:0030833	regulation of actin filament polymerization	30/1957	158/18493	0.00108196	0.0184474	2017/2039/120/387/57180/10109/93663/10093/2934/2885/11344/8440/829/7456/9535/10092/10096/9886/253260/136319/6710/10095/10787/10097/7429/274/29766/5962/7114/118	30
GOTERM_BP	GO:0043462	regulation of ATPase activity	18/1957	78/18493	0.00109284	0.0185091	11345/8655/10049/5867/140735/3301/203547/8775/5018/1785/54899/11080/7114/63892/131118/1266/29103/3192	18
GOTERM_BP	GO:0062033	positive regulation of mitotic sister chromatid segregation	7/1957	17/18493	0.00109516	0.0185091	51433/9555/5925/84250/8452/9787/3192	7
GOTERM_BP	GO:0090330	regulation of platelet aggregation	7/1957	17/18493	0.00109516	0.0185091	928/2039/239/6850/5578/84959/5592	7
GOTERM_BP	GO:0016311	dephosphorylation	72/1957	475/18493	0.00110202	0.018571	27071/805/2280/5534/7529/8555/5782/8073/10776/94274/56953/23261/801/121665/8725/261726/163882/58497/5500/10507/151742/5494/2029/11261/22870/5532/5516/5795/9829/5510/10217/55125/4534/5537/151987/115352/64062/9663/10454/8732/84959/5341/3064/8446/5536/11266/5533/5725/26051/5519/201562/22876/29085/81537/142679/55105/3613/64077/8556/54434/28227/11123/9887/9787/90853/2203/54961/5495/328/57082/5446/5444	72
GOTERM_BP	GO:0030330	DNA damage response, signal transduction by p53 class mediator	22/1957	104/18493	0.00113605	0.0189514	972/6154/6672/51065/754/9337/25904/1869/3276/1647/472/23028/891/9100/64844/29883/9521/4848/1017/1655/387893/10397	22
GOTERM_BP	GO:0034605	cellular response to heat	22/1957	104/18493	0.00113605	0.0189514	10049/7057/9261/573/3312/3313/3162/57805/472/1616/3297/3281/170506/26973/26509/7175/5594/5595/27429/51501/26353/3320	22
GOTERM_BP	GO:0048010	vascular endothelial growth factor receptor signaling pathway	20/1957	91/18493	0.00114074	0.0189514	3690/387/998/2534/9261/8440/7867/10006/5291/10787/6714/7424/26509/9844/405/5062/3087/5747/2887/3320	20
GOTERM_BP	GO:0031145	anaphase-promoting complex-dependent catabolic process	11/1957	37/18493	0.00114094	0.0189514	7311/51433/7324/996/891/8697/8881/1017/8452/9232/11065	11
GOTERM_BP	GO:0051693	actin filament capping	11/1957	37/18493	0.00114094	0.0189514	2039/120/2934/11344/829/136319/6710/7429/29766/5962/118	11
GOTERM_BP	GO:0030099	myeloid cell differentiation	63/1957	405/18493	0.00114569	0.0189637	87/51266/2039/4778/8366/351/25893/3674/5305/8367/80739/972/998/7057/27102/80762/8363/55294/27086/10398/2113/2539/8365/2551/760/2811/5578/116151/3276/10935/3313/4211/3398/23112/5925/9948/6886/8357/6208/54977/3658/1499/4853/4352/6714/80349/84959/10100/5196/29766/3020/114609/118/405/841/10401/5814/3146/8861/4297/8761/677/714	63
GOTERM_BP	GO:0071824	protein-DNA complex subunit organization	48/1957	290/18493	0.00115232	0.0189637	85236/4778/4673/8366/8970/1069/8339/8340/8367/8363/4676/4869/7311/55320/3018/2958/8349/8365/81611/9349/8343/5887/9555/5925/7259/8357/375757/6874/6873/1616/55832/3005/257218/6882/9519/2960/3020/196528/3070/54145/10847/4331/6883/3146/144108/11144/902/57082	48
GOTERM_BP	GO:0031295	T cell costimulation	14/1957	54/18493	0.0011539	0.0189637	9402/7292/998/2534/1445/2885/1326/8764/6714/10673/1947/5062/959/7525	14
GOTERM_BP	GO:0006732	coenzyme metabolic process	56/1957	351/18493	0.00115981	0.0189637	2597/2821/3098/9446/27430/5315/6515/79993/51071/5226/1727/4144/10654/5165/10797/2539/1743/262/4191/5230/54541/23530/3157/283209/2820/84320/8801/2026/8050/60481/4200/84274/4524/5236/133686/84105/952/405/5095/284486/6622/201562/8034/60496/4199/5092/4837/55526/5163/55312/8876/4704/2203/8564/55711/4522	56
GOTERM_BP	GO:0007034	vacuolar transport	26/1957	131/18493	0.00116059	0.0189637	1191/54741/80762/55297/30845/51160/3312/6845/8031/27243/51542/51652/84313/7251/738/4534/25978/4074/51510/10490/3920/274/7879/64400/23274/23557	26
GOTERM_BP	GO:2000573	positive regulation of DNA biosynthetic process	16/1957	66/18493	0.00116131	0.0189637	3178/22948/140609/3184/10574/10694/472/1499/6714/5594/5595/9314/8658/3181/25913/3320	16
GOTERM_BP	GO:0018212	peptidyl-tyrosine modification	61/1957	390/18493	0.00118713	0.0193309	2039/3690/5154/351/55024/972/2534/55294/1445/1950/5606/6850/56034/1442/10507/640/8440/948/9467/5607/84313/7251/5795/6886/1523/26127/8764/6416/253260/10006/5912/6352/26228/9181/3297/3572/6714/29883/8459/1856/5604/8767/1443/4750/1947/79031/11140/5062/22876/5595/23394/6259/2268/7006/7525/5747/84632/10420/5590/3320/2621	61
GOTERM_BP	GO:0009408	response to heat	28/1957	145/18493	0.00119398	0.0193879	10049/7057/5037/6647/9261/573/3312/3301/3313/3162/57805/472/11080/1616/3297/3281/170506/26973/26509/7041/7175/5594/5595/27429/51501/1967/26353/3320	28
GOTERM_BP	GO:0071103	DNA conformation change	47/1957	283/18493	0.00119904	0.0194158	85236/4673/8366/8970/8339/301/8340/8367/8363/4676/4869/55320/3018/8349/8365/8343/4175/5965/9555/7259/8357/891/9918/1616/3005/257218/7153/23064/1653/170506/3020/7175/3070/54145/1108/4331/7486/3087/3146/1763/144108/3181/56897/6832/25913/57082/83990	47
GOTERM_BP	GO:0006626	protein targeting to mitochondrion	21/1957	98/18493	0.00122526	0.019785	54741/706/55294/51024/25793/665/9927/9520/401505/58480/22885/4285/131118/27429/100652748/3308/26517/29103/10531/54332/3320	21
GOTERM_BP	GO:0006596	polyamine biosynthetic process	6/1957	13/18493	0.00123792	0.0198555	6611/54498/4953/4946/262/51582	6
GOTERM_BP	GO:0080009	mRNA methylation	6/1957	13/18493	0.00123792	0.0198555	25962/56339/79872/23091/55006/57721	6
GOTERM_BP	GO:0042744	hydrogen peroxide catabolic process	10/1957	32/18493	0.00124333	0.0198555	3048/3047/9588/2876/25824/10935/23530/7001/6622/3049	10
GOTERM_BP	GO:0050685	positive regulation of mRNA processing	10/1957	32/18493	0.00124333	0.0198555	9588/3312/27339/11051/27316/891/3297/170506/4686/22938	10
GOTERM_BP	GO:1903077	negative regulation of protein localization to plasma membrane	8/1957	22/18493	0.00126781	0.0201908	1173/598/1445/1601/8650/8301/64114/1213	8
GOTERM_BP	GO:1901879	regulation of protein depolymerization	18/1957	79/18493	0.00127778	0.0202462	1072/2039/120/2934/11344/829/9948/136319/23122/6710/9181/7429/58526/5341/29766/5962/118/26586	18
GOTERM_BP	GO:1902373	negative regulation of mRNA catabolic process	12/1957	43/18493	0.00127826	0.0202462	4904/8531/10140/9261/26986/3184/3183/1869/51594/114609/1994/3192	12
GOTERM_BP	GO:0051099	positive regulation of binding	33/1957	181/18493	0.00129492	0.0204202	805/6135/11315/351/2280/9750/267/1950/7295/121665/1025/3925/5925/5516/8663/23028/1499/3005/3297/8767/114609/118/51185/4686/23032/23383/3146/94056/64400/9314/8874/4242/5444	33
GOTERM_BP	GO:0051261	protein depolymerization	22/1957	105/18493	0.0012963	0.0204202	3796/1072/2039/120/2934/3925/3312/11344/829/9948/9829/136319/23122/6710/9181/7429/58526/5341/29766/5962/118/26586	22
GOTERM_BP	GO:0009141	nucleoside triphosphate metabolic process	50/1957	307/18493	0.00132092	0.0207517	2597/2821/3098/7388/11315/5315/3615/4698/387/706/51727/4713/3312/7381/5230/54541/4714/4724/283209/4718/9167/4696/2026/891/4706/4702/6834/9519/5236/6391/4711/7114/405/2987/4719/272/1355/6622/2395/10165/56474/10059/4720/55526/3704/4204/4704/29103/2203/440567	50
GOTERM_BP	GO:0009267	cellular response to starvation	28/1957	146/18493	0.00133123	0.0208009	4149/81631/11345/2752/3178/25994/1611/5289/10634/4217/3312/143686/8428/2308/64121/3920/9451/440275/5594/23032/7486/5595/5287/23274/8131/643246/29103/2621	28
GOTERM_BP	GO:0010389	regulation of G2/M transition of mitotic cell cycle	29/1957	153/18493	0.00133473	0.0208009	7277/203068/8655/1069/10383/8766/351/7846/5577/4303/54820/5885/10540/5569/472/55125/1112/51347/5087/55031/891/5108/11073/2273/1017/60561/4204/54930/3320	29
GOTERM_BP	GO:0042273	ribosomal large subunit biogenesis	17/1957	73/18493	0.00133481	0.0208009	6122/6135/6136/6152/6169/6165/6147/6154/4869/6175/9045/4809/6125/6134/117246/79707/9326	17
GOTERM_BP	GO:0061515	myeloid cell development	16/1957	67/18493	0.00137828	0.0214207	2039/351/25893/5305/80739/55294/27086/2539/116151/4211/6886/4853/6714/10100/29766/8761	16
GOTERM_BP	GO:0072331	signal transduction by p53 class mediator	38/1957	218/18493	0.00139227	0.0215197	6135/972/6154/6672/6201/51065/754/9349/9337/54541/6749/80196/25904/1869/3276/7917/1647/472/23028/891/6874/6873/9100/64844/6125/29883/6882/9521/54971/4848/22938/6883/10419/1017/1655/387893/91875/10397	38
GOTERM_BP	GO:0000280	nuclear division	64/1957	416/18493	0.00139404	0.0215197	3796/2316/896/6152/8766/387/5037/8555/1950/5573/51433/27243/9555/7917/54820/54461/5925/5885/5719/23244/10096/472/55125/996/3837/23122/25978/51510/891/9918/858/81565/10097/3297/8697/7153/8881/25936/7175/55781/84250/23383/3832/152185/151246/146691/10419/8243/8658/8452/11144/55968/8556/9735/55706/9232/9787/259266/11065/3192/5810/4437/54619/83990	64
GOTERM_BP	GO:0016233	telomere capping	14/1957	55/18493	0.00139951	0.0215197	8366/8367/54386/8363/140609/8365/7515/3184/472/5594/5595/5591/8658/25913	14
GOTERM_BP	GO:0031294	lymphocyte costimulation	14/1957	55/18493	0.00139951	0.0215197	9402/7292/998/2534/1445/2885/1326/8764/6714/10673/1947/5062/959/7525	14
GOTERM_BP	GO:0043280	positive regulation of cysteine-type endopeptidase activity involved in apoptotic process	25/1957	126/18493	0.0014351	0.0220016	27018/10134/6188/387/10550/834/5023/1611/2149/51024/340485/51065/2934/4217/3297/9451/26355/841/6622/3146/27429/400410/112399/6279/6280	25
GOTERM_BP	GO:1903037	regulation of leukocyte cell-cell adhesion	48/1957	293/18493	0.00143843	0.0220016	9402/7292/6188/301/387/9750/972/998/2534/80762/8654/1445/54542/2319/5573/961/6850/2113/2885/8440/1326/9092/8764/57162/79626/57045/6352/10892/64844/3109/10125/3572/6714/10673/8767/3133/1947/5062/912/3146/959/9314/160365/7525/8876/84695/3676/5590	48
GOTERM_BP	GO:2000058	regulation of ubiquitin-dependent protein catabolic process	28/1957	147/18493	0.00148192	0.0226071	1191/6135/11315/10134/258010/55294/1601/6201/1950/7337/9349/5887/7917/57805/51035/54467/90637/6613/25897/4534/6125/25898/150684/79031/23640/23274/5747/51322	28
GOTERM_BP	GO:0009060	aerobic respiration	18/1957	80/18493	0.00148862	0.0226497	7388/56181/1743/4191/7381/23530/8801/5018/3658/3421/6834/4200/664/6391/1355/2395/55526/440567	18
GOTERM_BP	GO:0006903	vesicle targeting	20/1957	93/18493	0.00151214	0.0228438	58485/10959/22870/5413/27095/8775/51128/23122/5537/4905/6399/8773/10948/7109/10484/10053/4033/8452/10427/2157	20
GOTERM_BP	GO:0030219	megakaryocyte differentiation	20/1957	93/18493	0.00151214	0.0228438	4778/8366/3674/5305/8367/80739/7057/8363/10398/8365/2551/2811/3276/4211/23112/6886/8357/5196/3020/4297	20
GOTERM_BP	GO:0035690	cellular response to drug	56/1957	355/18493	0.0015132	0.0228438	6001/2782/11315/60/5660/3178/64805/6188/301/3934/5908/2534/6647/94274/340485/7295/2113/2551/4217/3184/54541/5532/11235/3162/687/4790/2308/1785/2730/51510/1616/9181/1499/3297/6714/2776/23064/664/53335/3397/8767/5536/5594/2395/5595/1017/1977/9314/54434/4297/8914/5151/2203/59338/328/2621	56
GOTERM_BP	GO:1901652	response to peptide	72/1957	481/18493	0.00154827	0.0233125	4149/896/6678/54741/351/5315/301/5872/9550/5908/9296/2534/529/6431/1445/51024/5575/5573/51094/3030/51274/1442/11031/760/2885/7076/5577/9349/1979/948/10890/4303/353/143686/1176/231/4790/2308/682/51510/858/81565/9181/3297/5641/9663/51762/6714/3397/8767/1443/64397/5021/3087/94056/10603/9314/5591/694/1759/5747/1967/8914/2887/677/2805/5590/328/3663/83990/1154/2155	72
GOTERM_BP	GO:0090066	regulation of anatomical structure size	74/1957	497/18493	0.00155392	0.0233369	6648/2017/1072/4478/2039/1173/8766/120/3611/2664/387/57180/1182/10109/6647/5023/93663/2149/2876/10093/8301/6915/7504/5910/196527/1808/2934/2885/10507/11344/8440/23111/829/3162/7456/9535/9948/10092/10096/9886/10000/253260/136319/552/23028/1785/2730/6710/81565/10095/10787/10097/7429/274/5341/55144/3475/29766/5592/5962/7114/118/952/10542/5021/134430/6532/23394/6259/54434/22902/54961/9175/1311	74
GOTERM_BP	GO:0006353	DNA-templated transcription, termination	17/1957	74/18493	0.0015651	0.0233875	7884/5440/11051/5434/22803/23064/51728/53981/4150/4686/4331/10419/10914/6607/8106/902/10978	17
GOTERM_BP	GO:0042594	response to starvation	33/1957	183/18493	0.00156535	0.0233875	4149/81631/11345/2752/3178/25994/11167/27102/1611/5289/10634/4217/3312/143686/8428/2308/8443/64121/3920/9451/5019/440275/5594/23032/7486/5595/5287/23274/9779/8131/643246/29103/2621	33
GOTERM_BP	GO:0047496	vesicle transport along microtubule	12/1957	44/18493	0.00159079	0.0235982	26258/22920/6845/54820/1176/81565/10125/63915/3064/23557/10947/5590	12
GOTERM_BP	GO:0061014	positive regulation of mRNA catabolic process	12/1957	44/18493	0.00159079	0.0235982	10140/26986/3184/9337/23112/10236/56339/29883/170506/27161/677/57721	12
GOTERM_BP	GO:0010821	regulation of mitochondrion organization	32/1957	176/18493	0.00159167	0.0235982	7534/2017/1191/11315/54741/598/25994/706/7529/55294/51024/2876/10971/25793/665/64423/1869/9927/4000/9520/58480/22885/664/26355/3064/841/11140/2395/27429/23274/10059/7533	32
GOTERM_BP	GO:0018108	peptidyl-tyrosine phosphorylation	60/1957	387/18493	0.00160449	0.0236152	2039/3690/5154/351/55024/972/2534/55294/1445/1950/5606/6850/56034/1442/10507/640/8440/948/9467/5607/84313/7251/5795/6886/1523/26127/8764/6416/253260/10006/5912/6352/26228/9181/3297/3572/6714/29883/1856/5604/8767/1443/4750/1947/79031/11140/5062/22876/5595/23394/6259/2268/7006/7525/5747/84632/10420/5590/3320/2621	60
GOTERM_BP	GO:0009144	purine nucleoside triphosphate metabolic process	47/1957	287/18493	0.00161389	0.0236152	2597/2821/3098/7388/11315/5315/3615/4698/387/706/4713/3312/7381/5230/54541/4714/4724/283209/4718/9167/4696/2026/891/4706/4702/6834/5236/6391/4711/7114/405/2987/4719/272/1355/6622/2395/10165/10059/4720/55526/3704/4204/4704/29103/2203/440567	47
GOTERM_BP	GO:0033047	regulation of mitotic sister chromatid segregation	16/1957	68/18493	0.0016284	0.0236152	51433/9555/5925/5885/472/996/891/8697/7175/55781/84250/8658/8452/9232/9787/3192	16
GOTERM_BP	GO:0007597	blood coagulation, intrinsic pathway	7/1957	18/18493	0.00162948	0.0236152	2815/2814/708/2811/7450/2147/2157	7
GOTERM_BP	GO:0043555	regulation of translation in response to stress	7/1957	18/18493	0.00162948	0.0236152	27102/4869/8440/5936/9451/440275/6197	7
GOTERM_BP	GO:0045653	negative regulation of megakaryocyte differentiation	7/1957	18/18493	0.00162948	0.0236152	8366/8367/8363/8365/2551/3276/5196	7
GOTERM_BP	GO:1900151	regulation of nuclear-transcribed mRNA catabolic process, deadenylation-dependent decay	7/1957	18/18493	0.00162948	0.0236152	10140/26986/23112/29883/170506/27161/677	7
GOTERM_BP	GO:1900153	positive regulation of nuclear-transcribed mRNA catabolic process, deadenylation-dependent decay	7/1957	18/18493	0.00162948	0.0236152	10140/26986/23112/29883/170506/27161/677	7
GOTERM_BP	GO:1903392	negative regulation of adherens junction organization	7/1957	18/18493	0.00162948	0.0236152	2039/23603/7057/395/23122/6714/5962	7
GOTERM_BP	GO:0042542	response to hydrogen peroxide	27/1957	141/18493	0.00164417	0.0237687	11315/5660/6188/301/3934/2534/6647/2876/7295/2113/4217/10935/11235/3162/5516/8428/2308/3297/6714/23064/664/5536/2395/9314/5151/59338/328	27
GOTERM_BP	GO:0006879	cellular iron ion homeostasis	15/1957	62/18493	0.00167189	0.0240495	2495/3934/9550/80762/6647/10539/654/30061/8031/3162/3658/55832/57217/2395/1356	15
GOTERM_BP	GO:0048857	neural nucleus development	15/1957	62/18493	0.00167189	0.0240495	805/8655/60/387/998/10971/801/2539/2746/4129/54145/80264/10427/5810/7533	15
GOTERM_BP	GO:0046605	regulation of centrosome cycle	14/1957	56/18493	0.00168724	0.0241504	1069/56890/4869/27243/51652/54461/25978/51510/1499/26973/7514/3832/152185/55968	14
GOTERM_BP	GO:1901799	negative regulation of proteasomal protein catabolic process	14/1957	56/18493	0.00168724	0.0241504	6135/11345/11315/258010/7917/57805/51035/80011/4534/64844/55432/4983/23274/51322	14
GOTERM_BP	GO:0010951	negative regulation of endopeptidase activity	42/1957	250/18493	0.0016938	0.0241846	2597/2821/1032/11315/27018/10049/351/6478/5627/7057/10653/5037/2876/25824/8301/114769/1475/25816/7076/80196/10935/5269/5607/5272/23204/5045/831/55031/6714/5054/7429/274/10542/6197/5062/6622/9314/57630/9232/3053/2621/5104	42
GOTERM_BP	GO:0042110	T cell activation	68/1957	451/18493	0.00170941	0.0243475	4478/896/9402/7292/6188/301/2280/387/9750/972/998/2534/80762/6647/8654/3953/1445/54542/2319/5573/27086/961/6850/2934/2885/11119/8440/5532/1326/50856/27040/914/9092/8764/57162/79626/57045/6352/10892/64844/3109/10125/1499/3572/6714/56339/5873/917/10673/8767/3133/440275/1947/80758/911/841/5062/912/3146/959/5591/160365/7525/57630/8876/84695/677/5590	68
GOTERM_BP	GO:0006399	tRNA metabolic process	33/1957	184/18493	0.00171804	0.0244105	5464/5917/3028/5859/55623/54901/10667/22929/3376/1653/339487/9521/51728/54859/23587/55278/63892/80222/2193/79979/112487/8270/7965/55699/8518/55621/54517/142940/55006/134637/51091/10978/79691	33
GOTERM_BP	GO:0051984	positive regulation of chromosome segregation	9/1957	28/18493	0.00173663	0.0245542	51433/9555/5925/5885/891/84250/8452/9787/3192	9
GOTERM_BP	GO:1902745	positive regulation of lamellipodium organization	9/1957	28/18493	0.00173663	0.0245542	23603/998/10109/11344/1785/10787/6714/7429/8874	9
GOTERM_BP	GO:0022406	membrane docking	32/1957	177/18493	0.00175018	0.0246856	7277/4478/203068/8655/1069/10383/8766/6813/7846/132320/26258/5577/22832/11261/10890/152579/54820/10540/55125/858/10490/5108/51762/4905/5341/7879/55770/8417/9657/26005/54930/3320	32
GOTERM_BP	GO:0007249	I-kappaB kinase/NF-kappaB signaling	43/1957	258/18493	0.00176189	0.0247189	2316/57153/2280/387/972/2534/80762/1936/54386/834/54469/2149/7311/114769/6283/5494/57708/948/56674/3162/27032/389/84270/57162/8517/10892/9100/1499/7334/10454/10475/51026/8904/1653/51135/170506/8767/114609/5536/841/5966/5495/22954	43
GOTERM_BP	GO:0010499	proteasomal ubiquitin-independent protein catabolic process	8/1957	23/18493	0.00176533	0.0247189	5688/5691/5683/5687/5686/5685/5694/5689	8
GOTERM_BP	GO:0060055	angiogenesis involved in wound healing	8/1957	23/18493	0.00176533	0.0247189	3690/2683/2876/2113/79602/5291/5054/10855	8
GOTERM_BP	GO:1901214	regulation of neuron death	48/1957	296/18493	0.00178512	0.0249357	6648/2821/1191/11315/3611/598/387/998/2534/6647/2149/55294/51024/2876/112398/8301/25793/2539/4217/9040/54541/11261/3162/22800/7786/472/6416/2730/84280/6352/8517/1616/1499/3297/5641/163/5536/841/6622/5966/27429/23394/7965/112399/54434/4204/84678/8564	48
GOTERM_BP	GO:0000086	G2/M transition of mitotic cell cycle	35/1957	199/18493	0.00179633	0.0250321	7277/805/203068/8655/1069/10383/8766/351/7846/10776/219771/5577/2029/4303/54820/5885/10540/5569/472/55125/1112/51347/5087/55031/1785/891/5108/6873/11073/2273/1017/60561/4204/54930/3320	35
GOTERM_BP	GO:1902229	regulation of intrinsic apoptotic signaling pathway in response to DNA damage	11/1957	39/18493	0.0018345	0.0255027	1191/1032/6188/598/972/6154/57805/55031/23028/64844/22954	11
GOTERM_BP	GO:1903039	positive regulation of leukocyte cell-cell adhesion	37/1957	214/18493	0.00185115	0.0256725	9402/7292/6188/301/387/972/998/2534/1445/2319/961/6850/2113/2885/8440/1326/9092/8764/6352/10892/3109/10125/3572/6714/10673/8767/3133/1947/5062/912/3146/959/160365/7525/8876/3676/5590	37
GOTERM_BP	GO:0019058	viral life cycle	47/1957	289/18493	0.0018649	0.0257055	3688/5478/3690/2040/5094/972/998/7852/8815/7311/7342/2934/51160/11059/26986/1487/3312/2060/27243/50848/51652/7913/7251/3836/8764/5045/3837/6352/25978/51510/858/10475/7153/29883/7514/440275/7879/10542/9217/55337/140564/1655/1380/6504/22954/5034/2621	47
GOTERM_BP	GO:0034333	adherens junction assembly	19/1957	88/18493	0.00186683	0.0257055	87/2017/7414/2039/3987/23603/387/7057/395/5795/23122/1499/6714/8394/8861/8874/5747/10420/51057	19
GOTERM_BP	GO:0070125	mitochondrial translational elongation	19/1957	88/18493	0.00186683	0.0257055	51258/51263/11222/55173/23107/60488/7284/64965/7818/10884/5018/6182/64981/28973/84311/51264/51073/124995/55037	19
GOTERM_BP	GO:0000819	sister chromatid segregation	33/1957	185/18493	0.00188344	0.0258728	8766/8555/55294/51433/27243/9555/5925/5885/23244/472/996/3837/25978/51510/891/9918/1499/79892/8697/7153/25936/7175/55781/84250/23383/151246/8243/8658/8452/8556/9232/9787/3192	33
GOTERM_BP	GO:0042098	T cell proliferation	32/1957	178/18493	0.00192215	0.0263421	4478/896/7292/6188/301/2534/80762/8654/54542/5573/6850/11119/8440/5532/8764/57162/57045/6352/10892/64844/3109/1499/3572/10673/8767/3133/1947/912/3146/959/160365/57630	32
GOTERM_BP	GO:0018198	peptidyl-cysteine modification	12/1957	45/18493	0.00196355	0.0267277	2597/11315/340481/10935/128/51125/55146/84885/51201/51304/6279/6280	12
GOTERM_BP	GO:0019081	viral translation	6/1957	14/18493	0.00197334	0.0267277	5094/8665/51386/8562/440275/5725	6
GOTERM_BP	GO:0046037	GMP metabolic process	6/1957	14/18493	0.00197334	0.0267277	4354/3615/3251/8833/2987/51292	6
GOTERM_BP	GO:0048308	organelle inheritance	6/1957	14/18493	0.00197334	0.0267277	7534/7443/11235/5604/5594/5595	6
GOTERM_BP	GO:0048313	Golgi inheritance	6/1957	14/18493	0.00197334	0.0267277	7534/7443/11235/5604/5594/5595	6
GOTERM_BP	GO:0051650	establishment of vesicle localization	47/1957	290/18493	0.00200273	0.0270625	58485/26052/8766/5908/5023/801/26258/22920/5874/6845/10959/22870/5413/54820/27095/10540/1176/8775/51128/1785/23122/5537/8517/81565/10125/63915/1499/4905/6399/5873/8773/3064/10948/7109/6622/10484/10053/4033/23557/8452/10059/1759/10427/10947/3676/5590/2157	47
GOTERM_BP	GO:0045931	positive regulation of mitotic cell cycle	29/1957	157/18493	0.00200933	0.0270886	896/8766/351/301/5037/1950/5578/51433/9555/5925/6886/5087/891/3297/5641/23326/29766/5962/7175/84250/1977/8452/55968/8877/4204/9787/11065/3192/328	29
GOTERM_BP	GO:0042743	hydrogen peroxide metabolic process	14/1957	57/18493	0.00202247	0.0271395	3048/3047/11315/2534/9588/6647/2876/25824/10935/23530/7001/4129/6622/3049	14
GOTERM_BP	GO:0045576	mast cell activation	14/1957	57/18493	0.00202247	0.0271395	10666/6813/6850/6283/6845/3162/27040/10125/1269/8773/8832/2268/57102/10397	14
GOTERM_BP	GO:0110053	regulation of actin filament organization	43/1957	260/18493	0.00205057	0.0274531	2316/2017/1072/2039/120/387/57180/998/10109/93663/10093/961/2934/3925/2885/11344/8440/829/395/7456/9535/9948/10092/389/10096/9886/253260/136319/23122/6710/10095/10787/10097/7429/274/5341/3397/29766/5962/7114/118/54434/54961	43
GOTERM_BP	GO:0008630	intrinsic apoptotic signaling pathway in response to DNA damage	21/1957	102/18493	0.002074	0.0277027	1191/1032/6188/598/972/6154/51065/54541/1869/7917/3162/57805/472/55031/23028/64844/599/22938/27429/5591/22954	21
GOTERM_BP	GO:0070661	leukocyte proliferation	46/1957	283/18493	0.00209254	0.0278759	4478/1191/896/7292/3615/6188/301/972/2534/80762/8654/54542/5573/22806/3251/6850/11119/8440/5532/8764/472/57162/973/57045/931/6352/10892/64844/3109/115352/1499/4352/3572/10673/8767/114609/3133/3070/1947/952/912/3146/959/160365/1380/57630	46
GOTERM_BP	GO:0010998	regulation of translational initiation by eIF2 alpha phosphorylation	5/1957	10/18493	0.0021062	0.0278759	27102/4869/8440/9451/440275	5
GOTERM_BP	GO:0051409	response to nitrosative stress	5/1957	10/18493	0.0021062	0.0278759	11315/3301/128/472/2730	5
GOTERM_BP	GO:2000480	negative regulation of cAMP-dependent protein kinase activity	5/1957	10/18493	0.0021062	0.0278759	11142/5575/5573/5577/5569	5
GOTERM_BP	GO:0032392	DNA geometric change	17/1957	76/18493	0.00212694	0.0280862	301/4175/5965/7153/23064/1653/170506/1108/4331/7486/3146/1763/3181/56897/6832/25913/83990	17
GOTERM_BP	GO:0000075	cell cycle checkpoint	37/1957	216/18493	0.00218761	0.0288218	51720/6152/598/6154/8555/51065/261726/9337/27339/25904/1869/3276/4303/5925/57805/1647/472/1112/51347/891/7153/29883/11073/7175/4848/440275/1017/1763/5591/60561/9735/8914/51322/65123/5810/9575/83990	37
GOTERM_BP	GO:0010466	negative regulation of peptidase activity	43/1957	261/18493	0.00220974	0.0290472	2597/2821/1032/11315/27018/10049/351/6478/5627/7057/10653/5037/2876/25824/8301/114769/1475/25816/7076/80196/10935/5269/5607/5272/51035/23204/5045/831/55031/6714/5054/7429/274/10542/6197/5062/6622/9314/57630/9232/3053/2621/5104	43
GOTERM_BP	GO:0016241	regulation of macroautophagy	29/1957	158/18493	0.00221781	0.0290874	2597/6009/55004/823/5305/9550/529/665/27131/9927/5049/3162/200576/143686/10241/4534/64121/8517/664/3064/8767/826/10542/11140/5595/27429/23274/8131/51322	29
GOTERM_BP	GO:1903050	regulation of proteolysis involved in cellular protein catabolic process	36/1957	209/18493	0.002259	0.0294315	1191/6135/11345/11315/10134/258010/5720/55294/2876/1601/6201/1950/7337/9349/5887/7917/57805/51035/54467/90637/80011/6613/25897/4534/64844/6125/55432/7110/25898/150684/79031/23640/4983/23274/5747/51322	36
GOTERM_BP	GO:0046364	monosaccharide biosynthetic process	20/1957	96/18493	0.00225928	0.0294315	2597/2821/5226/10776/3953/2539/4191/5230/2820/231/2308/2026/5903/5236/200186/10165/2203/2805/57001/55578	20
GOTERM_BP	GO:1902882	regulation of response to oxidative stress	20/1957	96/18493	0.00225928	0.0294315	6648/11315/5660/2534/6647/55294/2876/7295/25793/2530/948/9555/79772/143686/1499/27429/8876/5151/5034/10516	20
GOTERM_BP	GO:0009150	purine ribonucleotide metabolic process	72/1957	488/18493	0.00226504	0.0294404	2597/2821/3098/4354/2766/7388/11315/5315/3615/4698/387/79993/706/8654/10654/5165/3251/4713/11165/1743/3312/7381/5230/54541/4714/4724/3157/283209/353/84320/4718/9167/8801/8833/4696/9060/2026/891/8050/4706/60481/4702/6834/5236/6391/4711/8459/7114/405/2987/4719/284486/272/1355/6622/2395/201562/10165/51000/10059/4720/55526/51292/3704/5163/4204/4704/29103/5151/2203/440567/55711	72
GOTERM_BP	GO:0030835	negative regulation of actin filament depolymerization	11/1957	40/18493	0.00229202	0.0296198	2039/120/2934/11344/829/136319/6710/7429/29766/5962/118	11
GOTERM_BP	GO:0035735	intraciliary transport involved in cilium assembly	11/1957	40/18493	0.00229202	0.0296198	83658/8655/140735/117178/22920/5108/89891/57560/80173/79809/55112	11
GOTERM_BP	GO:0000302	response to reactive oxygen species	38/1957	224/18493	0.00229417	0.0296198	6648/11315/5660/6188/301/3934/2534/6647/2876/25824/7295/2113/4217/3184/948/10935/11235/3162/5516/7001/143686/8428/2308/1785/3297/6714/23064/664/5536/5594/2395/5595/1017/9314/5151/59338/328/10516	38
GOTERM_BP	GO:0065004	protein-DNA complex assembly	42/1957	254/18493	0.00230199	0.0296344	85236/4673/8366/8970/1069/8339/8340/8367/8363/4676/4869/7311/55320/3018/2958/8349/8365/8343/5887/9555/5925/7259/8357/375757/6874/6873/1616/55832/3005/257218/6882/9519/3020/3070/54145/4331/6883/3146/144108/11144/902/57082	42
GOTERM_BP	GO:1903321	negative regulation of protein modification by small protein conjugation or removal	18/1957	83/18493	0.00230552	0.0296344	6135/11315/6188/2534/706/6201/51160/9349/10362/3301/11261/51035/10625/64844/1499/6125/10401/10363	18
GOTERM_BP	GO:0050870	positive regulation of T cell activation	35/1957	202/18493	0.0023294	0.0298287	9402/7292/6188/301/387/972/998/2534/1445/2319/961/6850/2885/8440/1326/9092/8764/6352/10892/3109/10125/3572/6714/10673/8767/3133/1947/5062/912/3146/959/160365/7525/8876/5590	35
GOTERM_BP	GO:0016239	positive regulation of macroautophagy	15/1957	64/18493	0.00234182	0.0298287	5305/665/9927/5049/3162/143686/10241/8517/664/3064/8767/11140/5595/23274/51322	15
GOTERM_BP	GO:1901880	negative regulation of protein depolymerization	15/1957	64/18493	0.00234182	0.0298287	2039/120/2934/11344/829/136319/23122/6710/9181/7429/58526/29766/5962/118/26586	15
GOTERM_BP	GO:0046677	response to antibiotic	51/1957	323/18493	0.00234288	0.0298287	1191/6678/11315/5660/3178/6188/301/598/387/3934/2534/5037/6647/5321/2876/6915/7295/2113/2539/2934/4217/3184/9349/10935/11235/3162/7284/5516/8428/4129/2308/23028/1616/10097/3297/6714/51167/23064/664/3397/5019/5536/841/2395/9314/8914/5151/59338/328/3320/6279	51
GOTERM_BP	GO:0071800	podosome assembly	7/1957	19/18493	0.00234637	0.0298287	4478/51411/387/2934/9181/6714/28988	7
GOTERM_BP	GO:1904376	negative regulation of protein localization to cell periphery	8/1957	24/18493	0.00240505	0.0305078	1173/598/1445/1601/8650/8301/64114/1213	8
GOTERM_BP	GO:0010508	positive regulation of autophagy	22/1957	110/18493	0.0024195	0.0306242	11315/5305/258010/25793/665/9927/5049/3162/143686/10241/2308/5291/8517/664/3064/8767/440275/11140/5595/3146/23274/51322	22
GOTERM_BP	GO:0051222	positive regulation of protein transport	61/1957	402/18493	0.00246773	0.0311665	2316/2597/2821/3098/5478/2752/7292/8655/2040/54741/10134/998/2534/4946/834/2149/55294/51024/654/94121/6850/51160/163882/640/5494/11261/2746/5532/11235/7251/24145/79752/914/9520/8764/51128/58480/5108/10125/6714/7424/22885/170506/5019/8767/3133/7175/5594/55781/952/3495/5595/29085/3146/27429/2268/10059/5715/22902/5590/2621	61
GOTERM_BP	GO:0016999	antibiotic metabolic process	28/1957	152/18493	0.00247609	0.0311952	3048/3047/11315/2534/9588/6647/2876/25824/1743/4191/10935/23530/128/7001/231/8801/4129/3658/3421/2098/4200/6391/6480/55907/6622/3049/55526/7915	28
GOTERM_BP	GO:0051091	positive regulation of DNA-binding transcription factor activity	42/1957	255/18493	0.00248076	0.0311952	1191/11315/351/6188/54386/5687/4869/7311/11213/114769/2958/6283/948/10935/4790/136319/23028/8517/10892/9181/1499/7334/10454/10475/1856/51135/8767/114609/10987/200186/8896/6883/959/51389/8877/6929/5590/9575/9175/22954/6279/6280	42
GOTERM_BP	GO:0001101	response to acid chemical	52/1957	332/18493	0.00254228	0.0318996	1072/1032/928/2782/6678/55004/7292/598/387/2534/1374/51024/340485/5289/654/5165/56034/2934/3184/11344/948/1869/143686/231/472/2308/8443/552/2730/64121/3658/891/3297/6714/23064/197131/4524/53335/1786/5536/952/10542/22938/8273/27429/6532/54834/9314/7525/54332/2155/5444	52
GOTERM_BP	GO:0006892	post-Golgi vesicle-mediated transport	20/1957	97/18493	0.00256892	0.0321643	55297/1445/30845/377/381/163882/11031/6845/2060/10890/51542/51552/1785/10490/4905/51125/8773/150684/55770/5877	20
GOTERM_BP	GO:0009112	nucleobase metabolic process	10/1957	35/18493	0.00263493	0.0328488	2766/51727/3251/353/8833/23028/5594/56474/51292/4522	10
GOTERM_BP	GO:0071470	cellular response to osmotic stress	10/1957	35/18493	0.00263493	0.0328488	8531/4638/706/27347/5269/231/9181/55144/51719/677	10
GOTERM_BP	GO:0000070	mitotic sister chromatid segregation	28/1957	153/18493	0.00273176	0.0339828	8766/8555/51433/27243/9555/5925/5885/23244/472/996/3837/25978/51510/891/9918/8697/25936/7175/55781/84250/23383/8243/8658/8452/8556/9232/9787/3192	28
GOTERM_BP	GO:0000077	DNA damage checkpoint	27/1957	146/18493	0.00276373	0.0343069	51720/6154/8555/51065/261726/9337/27339/25904/1869/3276/4303/57805/1647/472/1112/51347/891/29883/4848/440275/1017/5591/60561/51322/5810/9575/83990	27
GOTERM_BP	GO:0034330	cell junction organization	46/1957	287/18493	0.00277184	0.034334	2316/87/71/2017/7414/928/2039/60/3987/23603/5872/3611/56288/387/5908/998/7057/2149/1445/8650/5578/50848/829/395/5795/9948/389/8443/143098/23122/1499/51762/6714/10982/5962/118/8394/4983/3801/8861/7094/8502/8874/5747/10420/51057	46
GOTERM_BP	GO:0034332	adherens junction organization	26/1957	139/18493	0.00278502	0.0344238	87/2017/7414/2039/3987/23603/387/7057/1445/8650/395/5795/23122/1499/51762/6714/10982/5962/118/8394/3801/8861/8874/5747/10420/51057	26
GOTERM_BP	GO:0043489	RNA stabilization	11/1957	41/18493	0.00283771	0.0350004	4904/8531/9261/26986/3184/3183/1869/170506/114609/1994/3192	11
GOTERM_BP	GO:0043543	protein acylation	40/1957	242/18493	0.0029024	0.0357223	11315/10933/54386/55274/1487/1743/340481/4191/5494/7917/51104/2308/23338/8202/23326/51125/55167/55146/84885/51201/10847/10943/200186/56655/5977/6622/5595/6883/8861/60560/79612/10902/10445/26036/4297/4204/26122/5495/9575/51304	40
GOTERM_BP	GO:1901185	negative regulation of ERBB signaling pathway	12/1957	47/18493	0.00292381	0.0359096	998/5782/1950/2885/2060/27131/84313/7251/5795/5641/7879/8874	12
GOTERM_BP	GO:0046685	response to arsenic-containing substance	9/1957	30/18493	0.00296148	0.0362953	3178/9446/3162/90637/79752/1616/5936/3297/170506	9
GOTERM_BP	GO:0006837	serotonin transport	6/1957	15/18493	0.00299655	0.0364171	5023/6850/4129/6622/6532/6571	6
GOTERM_BP	GO:0018158	protein oxidation	6/1957	15/18493	0.00299655	0.0364171	11315/2876/10935/285362/4015/84695	6
GOTERM_BP	GO:0043101	purine-containing compound salvage	6/1957	15/18493	0.00299655	0.0364171	2766/3251/56952/353/272/51292	6
GOTERM_BP	GO:0045116	protein neddylation	6/1957	15/18493	0.00299655	0.0364171	6135/140739/9040/54165/6125/23142	6
GOTERM_BP	GO:0051054	positive regulation of DNA metabolic process	37/1957	220/18493	0.00302154	0.036644	51720/7292/3178/6188/998/22948/140609/7515/3184/10574/10694/8239/472/6416/1499/10097/3297/7334/6714/1786/170506/5594/84250/7486/5595/3146/400410/1017/1763/9314/8658/3181/2187/4204/8914/25913/3320	37
GOTERM_BP	GO:0090114	COPII-coated vesicle budding	16/1957	72/18493	0.00304126	0.0368062	58485/3638/10959/22870/27095/8775/51128/5537/4905/6399/7109/10484/9217/8452/10427/2157	16
GOTERM_BP	GO:0010770	positive regulation of cell morphogenesis involved in differentiation	27/1957	147/18493	0.00305213	0.0368608	2316/2039/3987/8766/3611/2664/387/998/10109/708/10507/11344/6845/1523/9839/1785/81565/10097/4352/5604/170506/56965/23394/8874/10059/22902/9175	27
GOTERM_BP	GO:0098813	nuclear chromosome segregation	42/1957	258/18493	0.00309096	0.0372521	8766/998/8555/55294/51433/27243/9555/7917/5925/5885/23244/10096/472/996/3837/25978/51510/891/9918/1499/10097/79892/8697/7153/25936/7175/55781/84250/23383/152185/151246/8243/8658/8452/11144/8556/55706/9232/9787/3192/57082/83990	42
GOTERM_BP	GO:0007059	chromosome segregation	49/1957	312/18493	0.00314169	0.037785	8766/6188/998/8555/55294/348235/51433/9391/27243/9555/7917/54820/5925/5885/8239/23244/10096/472/996/3837/25978/51510/891/9918/81565/1499/10097/79892/8697/7153/23369/25936/7175/55781/84250/23383/152185/151246/8243/8658/8452/11144/8556/55706/9232/9787/3192/57082/83990	49
GOTERM_BP	GO:0050821	protein stabilization	30/1957	169/18493	0.00317615	0.0381204	2316/2597/1191/6135/23515/11315/55294/6201/2319/22948/9349/51701/10574/11261/11235/7917/10694/8239/64844/6125/3920/2776/51125/23032/11140/79612/91949/902/3320/1370	30
GOTERM_BP	GO:1903391	regulation of adherens junction organization	15/1957	66/18493	0.00322011	0.0385681	2039/3987/23603/387/7057/395/5795/23122/6714/10982/5962/118/8861/5747/51057	15
GOTERM_BP	GO:0051348	negative regulation of transferase activity	44/1957	274/18493	0.00325636	0.0389219	6135/11315/23603/3611/11142/1445/4869/6201/5575/5573/27250/11213/25793/5577/9349/3301/11261/1974/64853/10935/9555/9467/84313/5925/7251/9535/5795/1647/5859/5569/51347/6125/6714/2776/84959/26973/5998/5062/25937/3087/29085/142679/3192/25913	44
GOTERM_BP	GO:0007045	cell-substrate adherens junction assembly	17/1957	79/18493	0.00327898	0.0389256	87/2017/2039/3987/23603/387/7057/395/5795/23122/6714/8394/8861/8874/5747/10420/51057	17
GOTERM_BP	GO:0048041	focal adhesion assembly	17/1957	79/18493	0.00327898	0.0389256	87/2017/2039/3987/23603/387/7057/395/5795/23122/6714/8394/8861/8874/5747/10420/51057	17
GOTERM_BP	GO:0006144	purine nucleobase metabolic process	7/1957	20/18493	0.00328353	0.0389256	2766/3251/353/8833/23028/51292/4522	7
GOTERM_BP	GO:0007549	dosage compensation	7/1957	20/18493	0.00328353	0.0389256	10209/84333/9555/56339/51132/91746/3192	7
GOTERM_BP	GO:0048255	mRNA stabilization	10/1957	36/18493	0.00330782	0.0390539	4904/8531/9261/26986/3184/3183/1869/114609/1994/3192	10
GOTERM_BP	GO:0051973	positive regulation of telomerase activity	10/1957	36/18493	0.00330782	0.0390539	140609/3184/1499/5594/5595/9314/8658/3181/25913/3320	10
GOTERM_BP	GO:0051056	regulation of small GTPase mediated signal transduction	50/1957	321/18493	0.00340049	0.0400076	56882/3688/397/2664/387/9750/998/93663/2149/56990/23365/79658/55843/57480/3925/117178/257106/221472/2665/395/9927/51306/5516/389/64333/9886/5922/23607/1785/58480/9743/9181/55103/10125/4853/6714/9938/10982/117289/9459/5962/4983/10603/8452/8874/26037/27352/8567/2203/10672	50
GOTERM_BP	GO:0045807	positive regulation of endocytosis	26/1957	141/18493	0.00340931	0.0400076	1191/26119/1601/1950/8301/961/6850/196527/967/51160/948/7251/5795/1785/26228/5054/163/5873/79872/5533/6622/9779/10059/1759/636/2621	26
GOTERM_BP	GO:0071236	cellular response to antibiotic	26/1957	141/18493	0.00340931	0.0400076	1191/11315/5660/3178/6188/301/3934/5321/7295/2113/4217/9349/11235/2308/1616/10097/3297/23064/664/5536/2395/9314/8914/5151/59338/328	26
GOTERM_BP	GO:0034101	erythrocyte homeostasis	23/1957	120/18493	0.00345069	0.0404115	2821/2039/25893/6218/80739/2113/2539/116151/3276/3313/3162/3398/5925/6886/6208/54977/3658/29766/118/405/272/8861/677	23
GOTERM_BP	GO:2001235	positive regulation of apoptotic signaling pathway	30/1957	170/18493	0.00347573	0.0404396	7534/6135/11315/10134/6188/598/7057/7529/6154/6647/55294/51024/6201/10971/2934/10955/8440/1869/664/26355/162989/5519/841/5062/27429/10059/6477/7533/6279/6280	30
GOTERM_BP	GO:0010799	regulation of peptidyl-threonine phosphorylation	11/1957	42/18493	0.00348331	0.0404396	805/2039/351/56288/1950/801/54541/8767/5594/51719/8877	11
GOTERM_BP	GO:0010824	regulation of centrosome duplication	11/1957	42/18493	0.00348331	0.0404396	1069/56890/4869/27243/51652/54461/25978/51510/26973/7514/152185	11
GOTERM_BP	GO:0042326	negative regulation of phosphorylation	66/1957	448/18493	0.00348445	0.0404396	805/23770/1032/2039/11171/11315/8655/23603/3611/56288/387/5037/54386/10048/11142/1445/4869/5575/5573/27250/11213/801/25793/10507/5577/54541/3301/8440/11261/64853/10935/23530/9555/9467/84313/5925/7251/9535/5795/1647/5859/5569/10217/2308/51347/891/26228/2776/84959/26973/5536/5998/5062/6622/22876/25937/3087/142679/9314/5591/64081/29103/2887/2203/3192/5590	66
GOTERM_BP	GO:0072401	signal transduction involved in DNA integrity checkpoint	16/1957	73/18493	0.00352026	0.0404396	51720/6154/8555/9337/27339/25904/1869/3276/1647/472/891/29883/4848/1017/5591/60561	16
GOTERM_BP	GO:0072422	signal transduction involved in DNA damage checkpoint	16/1957	73/18493	0.00352026	0.0404396	51720/6154/8555/9337/27339/25904/1869/3276/1647/472/891/29883/4848/1017/5591/60561	16
GOTERM_BP	GO:0031442	positive regulation of mRNA 3'-end processing	5/1957	11/18493	0.00352641	0.0404396	11051/891/3297/170506/4686	5
GOTERM_BP	GO:0033234	negative regulation of protein sumoylation	5/1957	11/18493	0.00352641	0.0404396	11315/10362/1499/10401/10363	5
GOTERM_BP	GO:0071281	cellular response to iron ion	5/1957	11/18493	0.00352641	0.0404396	654/30061/3162/3658/891	5
GOTERM_BP	GO:0072567	chemokine (C-X-C motif) ligand 2 production	5/1957	11/18493	0.00352641	0.0404396	972/27086/5607/114609/9314	5
GOTERM_BP	GO:1902743	regulation of lamellipodium organization	12/1957	48/18493	0.00352983	0.0404396	2039/23603/998/10109/11344/1785/10787/6714/7429/8874/54434/54961	12
GOTERM_BP	GO:0036473	cell death in response to oxidative stress	19/1957	93/18493	0.00361359	0.0413176	6648/11315/5660/10550/2534/6647/55294/2876/7295/25793/4217/11235/8428/1499/27429/5163/8876/5151/5034	19
GOTERM_BP	GO:1902905	positive regulation of supramolecular fiber organization	34/1957	200/18493	0.00364861	0.0416358	2316/2017/1072/1191/351/6188/387/57180/998/10109/2876/10093/961/2934/57606/2885/8440/5925/7456/9535/9948/10092/389/10096/9886/253260/10095/10787/10097/7429/274/5341/3397/4204	34
GOTERM_BP	GO:0051170	import into nucleus	31/1957	178/18493	0.00369424	0.0420737	2316/3178/11142/754/7295/6850/2533/9349/11261/948/4000/3836/5569/3837/5903/22931/9818/55746/7175/5594/10553/23633/10526/727851/8720/51501/129401/6607/729540/25929/2621	31
GOTERM_BP	GO:0072593	reactive oxygen species metabolic process	44/1957	276/18493	0.00373686	0.0424757	6648/3048/3047/1191/239/11315/387/2534/7057/706/9588/6647/2876/25824/5165/961/6850/2539/2885/54541/948/2717/10935/23530/4724/7001/9263/1647/4129/2308/1785/51167/5873/664/4719/6622/9314/3049/55312/6571/3320/2147/10516/5446	44
GOTERM_BP	GO:0033045	regulation of sister chromatid segregation	17/1957	80/18493	0.00376209	0.0426787	51433/9555/5925/5885/472/996/891/1499/8697/7175/55781/84250/8658/8452/9232/9787/3192	17
GOTERM_BP	GO:0036257	multivesicular body organization	9/1957	31/18493	0.00378711	0.0427951	8766/51160/27243/51652/84313/7251/25978/51510/5873	9
GOTERM_BP	GO:1902230	negative regulation of intrinsic apoptotic signaling pathway in response to DNA damage	9/1957	31/18493	0.00378711	0.0427951	1191/1032/598/972/57805/55031/23028/64844/22954	9
GOTERM_BP	GO:0010950	positive regulation of endopeptidase activity	30/1957	171/18493	0.00379895	0.0428453	27018/10134/6188/387/10550/2534/834/5023/5720/1611/2149/51024/340485/8301/51065/2934/4217/3297/5641/9451/26355/8767/841/6622/3146/27429/400410/112399/6279/6280	30
GOTERM_BP	GO:0009266	response to temperature stimulus	35/1957	208/18493	0.00381335	0.0429242	8531/2766/10049/7057/5037/6647/9261/573/3312/3301/80196/3313/3162/57805/472/2308/11080/1616/3297/3281/9451/170506/26973/26509/7041/7175/440275/5594/841/5595/27429/51501/1967/26353/3320	35
GOTERM_BP	GO:0030010	establishment of cell polarity	24/1957	128/18493	0.00383513	0.0430857	1072/4478/56288/387/9750/83700/5908/998/2319/2934/10890/54820/253260/143098/81565/9181/3064/4983/55968/5747/22902/5590/51057/3320	24
GOTERM_BP	GO:0048015	phosphatidylinositol-mediated signaling	29/1957	164/18493	0.00389841	0.0436432	6403/5154/5305/387/2534/708/2149/5289/56034/2934/10507/375033/5291/6352/10125/6714/5594/8394/57605/26051/22876/5595/5287/2268/9314/5747/59338/677/2147	29
GOTERM_BP	GO:0032956	regulation of actin cytoskeleton organization	51/1957	331/18493	0.0038998	0.0436432	2316/2017/1072/397/2039/5154/120/3611/387/83700/57180/998/10109/93663/10093/961/2934/3925/2885/11344/50848/8440/829/395/7456/9535/9948/10092/389/10096/9886/253260/23607/136319/23122/6710/26228/10095/10787/10097/7429/274/5341/3397/29766/5962/7114/118/29085/54434/54961	51
GOTERM_BP	GO:0007018	microtubule-based movement	43/1957	269/18493	0.00391602	0.0437402	3796/83658/8655/351/25893/998/140735/6647/8409/2319/26258/23299/117178/3312/22920/5874/6845/54820/10128/1176/10096/3837/5108/81565/10125/63915/10097/3064/3832/89891/3801/57560/23557/636/80173/10947/9787/3192/56992/5590/79809/55112/22858	43
GOTERM_BP	GO:0061097	regulation of protein tyrosine kinase activity	18/1957	87/18493	0.00395017	0.0440368	351/2534/55294/1950/8440/9467/84313/7251/6886/10006/5912/6352/26228/6714/1856/5062/84632/2621	18
GOTERM_BP	GO:0072395	signal transduction involved in cell cycle checkpoint	16/1957	74/18493	0.00405961	0.04517	51720/6154/8555/9337/27339/25904/1869/3276/1647/472/891/29883/4848/1017/5591/60561	16
GOTERM_BP	GO:0070301	cellular response to hydrogen peroxide	19/1957	94/18493	0.00408989	0.0453329	11315/5660/6188/301/3934/7295/2113/4217/11235/2308/3297/23064/664/5536/2395/9314/5151/59338/328	19
GOTERM_BP	GO:1905269	positive regulation of chromatin organization	19/1957	94/18493	0.00408989	0.0453329	1025/1487/57708/4000/6886/472/23028/891/1499/7334/80349/8726/1786/7175/22938/5595/5252/4297/4204	19
GOTERM_BP	GO:0032781	positive regulation of ATPase activity	13/1957	55/18493	0.00412853	0.0455868	11345/8655/10049/5867/140735/3301/8775/1785/11080/7114/131118/29103/3192	13
GOTERM_BP	GO:0070936	protein K48-linked ubiquitination	13/1957	55/18493	0.00412853	0.0455868	267/9111/7337/80196/7324/57162/54476/10475/10477/10299/51283/11065/22954	13
GOTERM_BP	GO:0007041	lysosomal transport	20/1957	101/18493	0.00418685	0.0461429	1191/55297/30845/3312/6845/8031/51542/51652/7251/738/4534/25978/4074/51510/3920/274/7879/64400/23274/23557	20
GOTERM_BP	GO:0099590	neurotransmitter receptor internalization	8/1957	26/18493	0.00421646	0.0463811	26052/3690/8650/2060/1785/163/4983/1759	8
GOTERM_BP	GO:0099518	vesicle cytoskeletal trafficking	12/1957	49/18493	0.00423312	0.0464762	26258/22920/6845/54820/1176/81565/10125/63915/3064/23557/10947/5590	12
GOTERM_BP	GO:0043393	regulation of protein binding	36/1957	217/18493	0.00428564	0.0469638	6135/11315/60/26119/351/2280/9750/267/1601/121665/114769/3925/948/64853/5516/80011/9236/23028/3297/6714/84959/3397/8767/114609/118/51185/23032/5595/94056/64400/23394/23557/8874/5092/3676/4242	36
GOTERM_BP	GO:0051881	regulation of mitochondrial membrane potential	15/1957	68/18493	0.00435225	0.0475212	1192/11315/598/10550/706/6647/665/23111/10935/23530/2730/6714/664/4719/2805	15
GOTERM_BP	GO:0001780	neutrophil homeostasis	6/1957	16/18493	0.0043693	0.0475212	301/83700/5291/4352/3146/4522	6
GOTERM_BP	GO:0006595	polyamine metabolic process	6/1957	16/18493	0.0043693	0.0475212	6611/54498/4953/4946/262/51582	6
GOTERM_BP	GO:0072673	lamellipodium morphogenesis	6/1957	16/18493	0.0043693	0.0475212	23603/6642/6643/6714/7429/8874	6
GOTERM_BP	GO:0016049	cell growth	70/1957	485/18493	0.004443	0.0482323	3688/2017/7414/1032/1982/55004/8766/351/3611/2664/387/998/112398/51094/8725/1808/2539/10507/11344/79602/23111/5532/5607/5925/7251/57805/5795/8239/9839/6416/136319/55031/552/1785/51320/81565/1499/8904/53335/3475/3020/440275/952/2273/4686/6197/2395/134430/23394/400410/6259/54879/84298/694/817/8877/22902/6832/3676/84678/2203/5590/9175/1154/22954/3320/2147/10516/6279/6280	70
GOTERM_BP	GO:0008360	regulation of cell shape	27/1957	151/18493	0.00447413	0.0482461	29780/56882/4478/2039/301/387/998/2534/93663/56990/55843/10507/221472/10810/9948/389/58480/22836/7429/5962/989/10484/2268/5747/10672/51057/2147	27
GOTERM_BP	GO:0033962	cytoplasmic mRNA processing body assembly	7/1957	21/18493	0.00448101	0.0482461	26065/219988/27258/197135/29883/80153/4848	7
GOTERM_BP	GO:1901798	positive regulation of signal transduction by p53 class mediator	7/1957	21/18493	0.00448101	0.0482461	6135/6154/6201/9349/472/9521/1655	7
GOTERM_BP	GO:2000114	regulation of establishment of cell polarity	7/1957	21/18493	0.00448101	0.0482461	9750/5908/2319/2934/253260/22902/51057	7
GOTERM_BP	GO:0043506	regulation of JUN kinase activity	18/1957	88/18493	0.00448588	0.0482461	6188/27250/6850/4217/221472/3301/64853/7786/9839/6416/51347/1616/28988/1856/8767/959/142679/9175	18
GOTERM_BP	GO:0007015	actin filament organization	59/1957	397/18493	0.00456738	0.0490316	2316/87/2017/1072/2039/120/387/57180/998/10109/93663/10093/961/2934/3925/7170/2885/11344/7171/8440/10810/829/395/85462/7456/9535/9948/10092/389/10096/9886/253260/23607/136319/10006/58480/23122/6710/10095/10787/9181/10097/22836/6714/9938/7429/274/5341/3397/29766/51019/5962/7114/118/8452/5358/54434/22902/54961	59
GOTERM_MF	GO:0045296	cadherin binding	75/1967	323/17632	3.93734e-10	4.13421e-07	2316/8407/3688/7534/2017/53827/7414/1192/1982/11315/6164/6152/5315/301/9588/7529/1936/6147/93663/5110/8650/8301/6642/5917/9124/6643/1968/3312/11344/2060/27131/50848/1983/9045/829/10890/10694/11252/8357/8428/7112/23607/10801/831/10006/143098/682/55854/25978/51510/28969/55082/9689/1499/9685/6714/28988/5694/29766/1265/11336/8727/5962/118/989/9351/5062/9217/1266/7094/8502/6159/10397/4854/3927	75
GOTERM_MF	GO:0003924	GTPase activity	67/1967	301/17632	2.03725e-08	7.52018e-06	7277/397/26052/2782/203068/6009/10383/8766/5872/387/5867/51807/5908/998/326624/7846/2781/4893/6016/377/84617/381/1968/11031/55752/10981/5874/2791/1983/84790/10890/9927/23157/5413/7284/9669/389/22800/51560/9886/10801/51128/51552/81027/5912/1785/58480/64121/51062/84932/51762/22836/2776/22931/5873/989/7879/54707/5869/9790/5898/51184/10059/9363/1759/116442/10672	67
GOTERM_MF	GO:0003735	structural constituent of ribosome	50/1967	200/17632	2.67586e-08	7.52018e-06	6207/6156/6122/6135/6222/6235/6203/6136/6189/6155/6164/6152/6169/6141/6165/6132/6188/6209/51258/6218/6224/6228/6161/6147/6154/7311/6201/51263/11222/6175/51065/6146/6205/9349/9045/60488/6208/64965/7818/10884/6182/6125/64981/28973/55133/6134/51264/51073/124995/6159	50
GOTERM_MF	GO:0050839	cell adhesion molecule binding	95/1967	486/17632	2.86483e-08	7.52018e-06	2316/8407/87/3688/7534/2017/4478/53827/7414/10666/928/1192/3690/1982/11315/6164/6152/5315/301/3611/83700/7057/9588/7529/1936/6147/93663/5110/8650/8301/6642/5917/9124/6643/6850/1968/83706/3312/5578/11344/2060/27131/50848/1983/9045/829/10890/10694/27020/11252/8357/8428/7112/23607/10801/831/10006/143098/682/55854/25978/51510/28969/55082/9689/1499/9685/6714/28988/7450/5694/29766/1265/11336/8727/5962/…	95
GOTERM_MF	GO:0005525	GTP binding	77/1967	375/17632	7.28413e-08	1.52967e-05	7277/26052/203068/6009/10383/8766/5872/387/5867/51807/5908/998/55303/326624/7846/2781/4893/30845/6016/377/84617/381/1968/11031/55752/10981/5874/1983/2746/84790/10890/9927/23157/5413/7284/9669/389/54622/309/22800/8801/51560/9886/10801/51128/7818/51552/81027/5912/221079/1785/58480/64121/51062/84932/51762/22836/22929/2776/155038/22931/8732/5873/989/7879/54707/5869/9790/5898/51184/8225/10059/9363/175…	77
GOTERM_MF	GO:0032550	purine ribonucleoside binding	77/1967	380/17632	1.29248e-07	2.00722e-05	7277/26052/203068/6009/10383/8766/5872/387/5867/51807/5908/998/55303/326624/7846/2781/4893/30845/6016/377/84617/381/1968/11031/55752/10981/5874/1983/2746/84790/10890/9927/23157/5413/7284/9669/389/54622/309/22800/8801/51560/9886/10801/51128/7818/51552/81027/5912/221079/1785/58480/64121/51062/84932/51762/22836/22929/2776/155038/22931/8732/5873/989/7879/54707/5869/9790/5898/51184/8225/10059/9363/175…	77
GOTERM_MF	GO:0019001	guanyl nucleotide binding	79/1967	396/17632	1.75719e-07	2.00722e-05	7277/26052/203068/6009/10383/8766/5872/387/5867/51807/5908/998/55303/326624/7846/2781/8654/4893/30845/6016/377/84617/381/1968/11031/55752/10981/5874/1983/2746/84790/10890/9927/23157/5413/7284/9669/389/54622/309/22800/8801/51560/9886/10801/51128/7818/51552/81027/5912/221079/1785/58480/64121/51062/84932/51762/22836/22929/2776/155038/22931/8732/5873/5592/989/7879/54707/5869/9790/5898/51184/8225/1005…	79
GOTERM_MF	GO:0032561	guanyl ribonucleotide binding	79/1967	396/17632	1.75719e-07	2.00722e-05	7277/26052/203068/6009/10383/8766/5872/387/5867/51807/5908/998/55303/326624/7846/2781/8654/4893/30845/6016/377/84617/381/1968/11031/55752/10981/5874/1983/2746/84790/10890/9927/23157/5413/7284/9669/389/54622/309/22800/8801/51560/9886/10801/51128/7818/51552/81027/5912/221079/1785/58480/64121/51062/84932/51762/22836/22929/2776/155038/22931/8732/5873/5592/989/7879/54707/5869/9790/5898/51184/8225/1005…	79
GOTERM_MF	GO:0001883	purine nucleoside binding	77/1967	383/17632	1.8087e-07	2.00722e-05	7277/26052/203068/6009/10383/8766/5872/387/5867/51807/5908/998/55303/326624/7846/2781/4893/30845/6016/377/84617/381/1968/11031/55752/10981/5874/1983/2746/84790/10890/9927/23157/5413/7284/9669/389/54622/309/22800/8801/51560/9886/10801/51128/7818/51552/81027/5912/221079/1785/58480/64121/51062/84932/51762/22836/22929/2776/155038/22931/8732/5873/989/7879/54707/5869/9790/5898/51184/8225/10059/9363/175…	77
GOTERM_MF	GO:0032549	ribonucleoside binding	77/1967	384/17632	2.02044e-07	2.00722e-05	7277/26052/203068/6009/10383/8766/5872/387/5867/51807/5908/998/55303/326624/7846/2781/4893/30845/6016/377/84617/381/1968/11031/55752/10981/5874/1983/2746/84790/10890/9927/23157/5413/7284/9669/389/54622/309/22800/8801/51560/9886/10801/51128/7818/51552/81027/5912/221079/1785/58480/64121/51062/84932/51762/22836/22929/2776/155038/22931/8732/5873/989/7879/54707/5869/9790/5898/51184/8225/10059/9363/175…	77
GOTERM_MF	GO:0001882	nucleoside binding	78/1967	391/17632	2.1028e-07	2.00722e-05	7277/26052/203068/6009/10383/8766/5872/387/5867/51807/5908/998/55303/326624/7846/2781/4893/30845/6016/377/84617/381/1968/11031/55752/10981/5874/1983/2746/84790/10890/9927/23157/5413/7284/9669/389/54622/309/22800/8801/51560/9886/10801/5422/51128/7818/51552/81027/5912/221079/1785/58480/64121/51062/84932/51762/22836/22929/2776/155038/22931/8732/5873/989/7879/54707/5869/9790/5898/51184/8225/10059/936…	78
GOTERM_MF	GO:0044389	ubiquitin-like protein ligase binding	64/1967	301/17632	2.48482e-07	2.17422e-05	7534/71/2821/1191/81631/6135/55120/7414/11345/203068/9246/5094/7852/9588/55294/7311/5573/25793/573/3312/4087/5577/9349/51701/3301/23111/80196/9927/7917/3313/9325/5925/7251/51035/10128/6613/8764/26043/2308/54472/891/8517/1616/257218/6125/7334/55432/6714/84959/55353/84250/841/23640/5898/57763/8452/6596/10059/4720/1629/11065/22888/152137/3320	64
GOTERM_MF	GO:0031625	ubiquitin protein ligase binding	61/1967	286/17632	4.21655e-07	3.40568e-05	7534/71/2821/1191/81631/6135/55120/7414/11345/203068/9246/5094/7852/9588/55294/7311/5573/25793/573/3312/4087/5577/9349/51701/3301/23111/80196/9927/7917/3313/5925/7251/51035/10128/6613/8764/26043/2308/54472/8517/1616/257218/6125/7334/55432/6714/84959/55353/84250/841/23640/5898/57763/8452/6596/10059/4720/1629/22888/152137/3320	61
GOTERM_MF	GO:0003743	translation initiation factor activity	18/1967	51/17632	4.91887e-06	0.000368916	10289/1982/10209/8665/1968/51386/8672/1983/1974/8562/8663/9669/8669/10987/27335/27161/1977/1967	18
GOTERM_MF	GO:0023026	MHC class II protein complex binding	9/1967	16/17632	1.44448e-05	0.00101114	3123/5315/972/3108/3122/3312/931/3109/3320	9
GOTERM_MF	GO:0097718	disordered domain specific binding	13/1967	32/17632	1.78321e-05	0.00117023	805/23770/2597/2534/801/4087/5925/1213/8202/1499/599/51645/3320	13
GOTERM_MF	GO:0060090	molecular adaptor activity	41/1967	196/17632	5.03904e-05	0.00311235	1173/9402/26119/301/267/55294/10140/10093/1601/10634/23299/1475/6451/2885/3312/8440/395/1523/27040/143098/26228/858/151987/6714/163/286/1856/51283/54875/114609/79368/10603/142679/10019/6450/636/57630/84632/2887/2621/3927	41
GOTERM_MF	GO:0019843	rRNA binding	19/1967	65/17632	5.71862e-05	0.00333586	6207/6135/6222/6203/6136/6132/6188/6147/6175/6205/7263/9349/23107/55272/6208/6125/55037/84678/90459	19
GOTERM_MF	GO:0017137	Rab GTPase binding	39/1967	185/17632	6.362e-05	0.00351584	58485/2664/9910/8301/94121/10260/23299/54521/64786/23527/27095/100128327/5147/55255/23216/23637/22836/4905/6399/60684/7109/729873/22878/201627/134957/79961/6532/23274/79735/54453/1121/9779/11138/10059/636/27352/8567/84958/10397	39
GOTERM_MF	GO:0030674	protein binding, bridging	36/1967	168/17632	8.41353e-05	0.0044171	1173/9402/26119/301/267/55294/10140/10093/1601/10634/23299/1475/6451/2885/3312/8440/395/1523/27040/26228/858/151987/6714/163/286/1856/51283/54875/114609/79368/10603/10019/6450/636/2887/3927	36
GOTERM_MF	GO:0047485	protein N-terminus binding	26/1967	107/17632	9.29677e-05	0.00464839	805/4778/10933/79718/8815/10971/801/51164/11235/84313/1647/472/8202/1616/4863/6882/3397/7450/5604/23613/4331/23383/6622/10401/55770/4204	26
GOTERM_MF	GO:0032182	ubiquitin-like protein binding	23/1967	91/17632	0.000122454	0.00584439	9246/7852/55294/25793/51160/10054/5887/130617/4077/7251/51035/26043/54472/8517/54165/1616/64844/7334/7153/10208/55968/23142/22954	23
GOTERM_MF	GO:0023023	MHC protein complex binding	9/1967	20/17632	0.00013975	0.00637987	3123/5315/972/3108/3122/3312/931/3109/3320	9
GOTERM_MF	GO:0003697	single-stranded DNA binding	25/1967	105/17632	0.000177677	0.00777337	4904/3178/301/10923/54386/8880/7555/5887/4175/10128/3297/23648/5395/170506/7247/5814/3146/23635/11144/170463/3181/129401/3192/25913/4437	25
GOTERM_MF	GO:0019207	kinase regulator activity	41/1967	208/17632	0.000199051	0.00836015	805/1032/896/11142/4869/1950/5575/5573/219771/801/5577/9802/11261/9555/9467/9535/5859/5569/51347/6352/891/10892/1616/10454/57498/5604/51719/4331/92597/11140/5062/3146/142679/9314/8518/84632/8567/902/54619/1154/2621	41
GOTERM_MF	GO:0031489	myosin V binding	8/1967	17/17632	0.000227006	0.00887322	8766/2521/5874/10890/51560/51552/5873/116442	8
GOTERM_MF	GO:0002020	protease binding	28/1967	125/17632	0.000228168	0.00887322	3688/3690/11315/3934/267/2319/114769/1475/7076/7917/5269/9325/51652/5272/24145/1213/5045/831/10892/5054/274/7450/10299/51283/8767/83752/1311/5104	28
GOTERM_MF	GO:0003779	actin binding	71/1967	421/17632	0.000243467	0.00913001	2316/29780/87/3688/1072/4478/53827/7414/2039/7739/23603/120/4638/57180/7852/10109/91624/10093/26258/2483/2934/64423/7170/11344/7171/10810/829/51088/85462/7456/9535/24145/9948/10092/23002/309/10096/6641/23406/54899/6710/10095/10097/22885/28988/64098/7429/274/29766/7125/1265/8727/5962/7114/118/4983/6622/6532/1266/7094/5358/54434/6525/5747/54961/3192/54784/9788/3652/7533/3927	71
GOTERM_MF	GO:0019003	GDP binding	17/1967	61/17632	0.000262044	0.00941712	6009/387/5867/5908/11031/5874/10890/8801/51552/5912/64121/51762/22931/5873/7879/5869/5898	17
GOTERM_MF	GO:0031210	phosphatidylcholine binding	10/1967	26/17632	0.000286744	0.00941712	27243/51652/23760/9468/10125/5130/57605/1071/5104/5360	10
GOTERM_MF	GO:0050997	quaternary ammonium group binding	10/1967	26/17632	0.000286744	0.00941712	27243/51652/23760/9468/10125/5130/57605/1071/5104/5360	10
GOTERM_MF	GO:0005200	structural constituent of cytoskeleton	24/1967	102/17632	0.000286998	0.00941712	7277/71/4478/203068/10383/60/120/51807/7846/10109/10093/84617/84790/10092/10096/23607/81027/6710/10095/10097/286/8030/7094/636	24
GOTERM_MF	GO:0005543	phospholipid binding	70/1967	417/17632	0.000307871	0.00979591	27071/5660/26119/51411/301/56288/9784/7057/5037/5321/4900/8301/6642/94121/6643/307/3312/11344/221472/27243/27131/3708/80196/57590/51652/23527/23760/8436/309/11252/64333/5922/9468/4534/54899/9743/51735/26228/10125/55041/8904/55353/7429/274/5341/26509/29934/114609/150684/5130/401548/57605/1071/4983/28966/91404/23161/6622/5287/3146/7094/7006/55968/129401/59338/2621/2159/5104/5444/5360	70
GOTERM_MF	GO:0019887	protein kinase regulator activity	36/1967	180/17632	0.00035408	0.0109348	805/1032/896/11142/4869/1950/5575/5573/219771/801/5577/9802/11261/9555/9467/9535/5859/5569/51347/6352/891/1616/57498/5604/51719/4331/11140/5062/3146/142679/8518/84632/8567/902/54619/2621	36
GOTERM_MF	GO:0003730	mRNA 3'-UTR binding	20/1967	80/17632	0.000386514	0.0112733	8531/10643/6201/22948/26986/3184/3183/5936/10236/6125/23369/170506/1994/9728/3181/1655/8761/677/3192/25929	20
GOTERM_MF	GO:0035591	signaling adaptor activity	20/1967	80/17632	0.000386514	0.0112733	9402/26119/10140/6451/2885/8440/395/27040/143098/26228/6714/79368/10603/142679/10019/6450/57630/84632/2887/3927	20
GOTERM_MF	GO:0044390	ubiquitin-like protein conjugating enzyme binding	12/1967	37/17632	0.000459384	0.0130366	11315/6478/6188/10054/54467/25897/54472/54165/64844/10299/6477/23142	12
GOTERM_MF	GO:0051015	actin filament binding	37/1967	190/17632	0.000506647	0.0139994	2316/87/1072/2039/7739/23603/120/10109/91624/10093/26258/2483/2934/7170/11344/7171/829/7456/24145/9948/10092/309/10096/6710/10095/10097/22885/28988/7429/274/7125/8727/118/6532/7094/5358/3927	37
GOTERM_MF	GO:0035325	Toll-like receptor binding	6/1967	11/17632	0.000537142	0.0144615	6850/948/54472/114609/6279/6280	6
GOTERM_MF	GO:0016651	oxidoreductase activity, acting on NAD(P)H	24/1967	107/17632	0.000606814	0.0155575	2766/4698/1727/51706/51714/4713/2936/5230/4714/10935/23530/4724/4718/4696/4706/4702/51167/4711/4719/1355/4720/51292/4704/8564	24
GOTERM_MF	GO:0050998	nitric-oxide synthase binding	7/1967	15/17632	0.000607482	0.0155575	26052/60/972/801/1785/6532/1759	7
GOTERM_MF	GO:0017124	SH3 domain binding	27/1967	127/17632	0.000699423	0.0174856	219670/80230/3611/26578/5782/2876/2530/83699/6451/2885/2060/395/9467/7456/9829/23607/10006/1785/9444/9844/64397/8030/55680/6450/1759/84632/9232	27
GOTERM_MF	GO:0048027	mRNA 5'-UTR binding	9/1967	24/17632	0.000718502	0.0175448	6207/10643/6189/6154/6201/22948/6208/6125/170506	9
GOTERM_MF	GO:0043130	ubiquitin binding	18/1967	73/17632	0.000883712	0.0210886	9246/7852/55294/25793/51160/5887/130617/4077/7251/51035/26043/54472/8517/64844/7334/7153/55968/22954	18
GOTERM_MF	GO:0004708	MAP kinase kinase activity	7/1967	16/17632	0.000976374	0.0227821	5606/5607/7867/6416/5604/5594/5595	7
GOTERM_MF	GO:0019787	ubiquitin-like protein transferase activity	68/1967	421/17632	0.00108392	0.0247416	23608/55120/51257/9246/6478/25893/267/998/26994/55294/54542/25793/580/7337/140739/9921/11059/64795/8266/51433/9040/80196/27339/7324/54461/54467/6613/57162/25897/55905/84246/54476/223082/10892/26235/80204/6468/5903/257218/7334/90390/8697/197131/130507/63893/26001/10477/10299/55016/79872/51283/55167/25898/51132/196394/10401/11342/8452/8916/5930/6596/26036/57630/6477/11065/22888/54894/22954	68
GOTERM_MF	GO:0061659	ubiquitin-like protein ligase activity	39/1967	213/17632	0.00125355	0.0264954	23608/55120/6478/25893/267/998/7337/11059/51433/80196/27339/54467/57162/25897/84246/54476/223082/257218/90390/197131/130507/63893/26001/10299/55016/79872/51283/55167/51132/11342/8452/5930/6596/26036/57630/6477/22888/54894/22954	39
GOTERM_MF	GO:0004298	threonine-type endopeptidase activity	8/1967	21/17632	0.00126169	0.0264954	5688/5691/5683/5687/5686/5685/5694/5689	8
GOTERM_MF	GO:0050750	low-density lipoprotein particle receptor binding	8/1967	21/17632	0.00126169	0.0264954	1191/1173/26119/9784/8301/3301/1213/57763	8
GOTERM_MF	GO:0070003	threonine-type peptidase activity	8/1967	21/17632	0.00126169	0.0264954	5688/5691/5683/5687/5686/5685/5694/5689	8
GOTERM_MF	GO:0003713	transcription coactivator activity	54/1967	321/17632	0.00134968	0.0277875	4149/87/4778/11315/10923/6672/4869/5450/9124/2958/2551/10521/2521/8031/9325/5925/2957/7251/116931/57805/23028/29079/57492/10499/8202/6874/1616/81550/1499/9663/90390/4863/6882/9519/23326/55749/7041/10987/10553/405/10847/9975/22938/8896/25937/6883/6671/5092/119392/5715/7543/6929/328/22954	54
GOTERM_MF	GO:0000287	magnesium ion binding	38/1967	208/17632	0.00149712	0.0291848	6009/2752/5315/5464/11213/10797/3251/11165/4217/51701/10054/5494/56952/1326/9578/8801/64121/2026/3421/7153/5236/374868/51135/170506/6197/7486/10396/6622/26061/64132/1017/60496/10914/64077/8877/10079/5495/22858	38
GOTERM_MF	GO:0061630	ubiquitin protein ligase activity	38/1967	208/17632	0.00149712	0.0291848	23608/55120/6478/25893/267/998/7337/11059/51433/80196/27339/54467/57162/25897/84246/54476/223082/257218/90390/197131/130507/63893/26001/10299/55016/79872/51283/55167/51132/11342/8452/5930/6596/57630/6477/22888/54894/22954	38
GOTERM_MF	GO:0000339	RNA cap binding	7/1967	17/17632	0.00150093	0.0291848	8672/27257/4686/27161/1977/392517/25929	7
GOTERM_MF	GO:0043028	cysteine-type endopeptidase regulator activity involved in apoptotic process	12/1967	42/17632	0.0016167	0.0305341	27018/834/25824/51065/25816/10935/5272/7429/6197/6622/400410/2621	12
GOTERM_MF	GO:0008135	translation factor activity, RNA binding	20/1967	89/17632	0.00162848	0.0305341	10289/1982/10209/8665/1936/1968/51386/8672/1983/1974/8562/7284/8663/9669/8669/10987/27335/27161/1977/1967	20
GOTERM_MF	GO:0045182	translation regulator activity	15/1967	59/17632	0.00166142	0.0306052	6203/10643/51247/27102/708/51065/26986/1979/6208/3658/9451/440275/6134/57409/1977	15
GOTERM_MF	GO:0003727	single-stranded RNA binding	20/1967	90/17632	0.00187848	0.034007	3178/301/26065/6201/7072/26986/7555/219988/3183/27316/1653/113251/5725/3146/27161/3187/10445/8761/3192/9987	20
GOTERM_MF	GO:0005070	SH3/SH2 adaptor activity	14/1967	54/17632	0.00191877	0.0341476	9402/10140/6451/2885/8440/395/27040/26228/6714/79368/10603/6450/2887/3927	14
GOTERM_MF	GO:0140104	molecular carrier activity	12/1967	43/17632	0.00201829	0.0353202	3048/3047/11315/6647/23039/3836/4706/7514/26034/23633/2395/3049	12
GOTERM_MF	GO:0032947	protein-containing complex scaffold activity	20/1967	91/17632	0.00216021	0.037184	55004/26119/286257/55752/8440/23157/5413/10801/54927/143098/858/9908/917/162989/989/10542/9351/142679/7965/57630	20
GOTERM_MF	GO:0019902	phosphatase binding	33/1967	178/17632	0.0023112	0.0391413	56288/5534/54386/6647/10776/1445/6850/163882/4217/2885/4087/22920/51433/2029/22870/5532/55125/29966/996/2308/54927/115352/1499/11215/286/9451/5594/9351/5595/8877/5747/11123/9887	33
GOTERM_MF	GO:0016209	antioxidant activity	19/1967	86/17632	0.00258548	0.0430913	6648/3048/5742/3047/11315/9446/9588/6647/2876/25824/51714/2879/2936/10935/7001/6415/26034/3049/6280	19
GOTERM_MF	GO:0044325	ion channel binding	25/1967	125/17632	0.0026388	0.0432928	2316/87/7534/805/1173/2280/2534/706/10971/801/3398/27020/24145/9100/1499/6714/6399/286/3064/2273/29085/817/7525/3752/7533	25
GOTERM_MF	GO:0036002	pre-mRNA binding	15/1967	62/17632	0.00281297	0.0454404	3178/6431/8233/7884/7307/7536/5936/102724594/27257/55285/5725/3181/1655/3192/90459	15
GOTERM_MF	GO:0019209	kinase activator activity	19/1967	87/17632	0.00296918	0.0472369	805/1950/801/9802/6352/891/10892/1616/10454/5604/51719/4331/92597/5062/3146/142679/84632/8567/2621	19
GOTERM_MF	GO:0048156	tau protein binding	7/1967	19/17632	0.00318187	0.0490073	1191/2534/8301/4087/274/6622/3320	7
GOTERM_MF	GO:0017112	Rab guanyl-nucleotide exchange factor activity	13/1967	51/17632	0.00322955	0.0490073	58485/10260/27095/100128327/55255/6399/60684/7109/22878/201627/79961/54453/8567	13
GOTERM_MF	GO:0030276	clathrin binding	14/1967	57/17632	0.00330759	0.0490073	1173/26119/1211/1601/8301/132320/1213/9829/162/9685/163/274/146691/10059	14
GOTERM_MF	GO:0051536	iron-sulfur cluster binding	15/1967	63/17632	0.00331871	0.0490073	6188/81689/10539/54901/5422/3658/493856/4719/57019/2395/27247/1763/4720/55847/83990	15
GOTERM_MF	GO:0051540	metal cluster binding	15/1967	63/17632	0.00331871	0.0490073	6188/81689/10539/54901/5422/3658/493856/4719/57019/2395/27247/1763/4720/55847/83990	15
GOTERM_MF	GO:0043027	cysteine-type endopeptidase inhibitor activity involved in apoptotic process	8/1967	24/17632	0.0033605	0.0490073	25824/25816/10935/5272/7429/6197/6622/2621	8
GOTERM_CC	GO:0005925	focal adhesion	117/2029	402/19659	3.13928e-26	2.24145e-23	2316/6207/29780/87/6156/3688/7534/71/6122/2017/1072/4478/6222/6235/7414/928/6203/5478/3690/6136/6189/823/6155/60/3987/7739/6169/23603/6141/6132/3674/6188/6209/301/6218/3611/5094/387/998/7529/10109/5782/4869/91624/1601/6201/30845/2319/10971/6175/8650/9124/4267/6146/6205/2934/26986/58497/3312/5500/9349/7171/11261/2665/51164/10890/3313/9260/1213/6251/10092/309/11252/22800/10096/6208/6641/1785/58480/…	117
GOTERM_CC	GO:0005924	cell-substrate adherens junction	117/2029	405/19659	6.42321e-26	2.29309e-23	2316/6207/29780/87/6156/3688/7534/71/6122/2017/1072/4478/6222/6235/7414/928/6203/5478/3690/6136/6189/823/6155/60/3987/7739/6169/23603/6141/6132/3674/6188/6209/301/6218/3611/5094/387/998/7529/10109/5782/4869/91624/1601/6201/30845/2319/10971/6175/8650/9124/4267/6146/6205/2934/26986/58497/3312/5500/9349/7171/11261/2665/51164/10890/3313/9260/1213/6251/10092/309/11252/22800/10096/6208/6641/1785/58480/…	117
GOTERM_CC	GO:0030055	cell-substrate junction	117/2029	409/19659	1.64521e-25	3.9156e-23	2316/6207/29780/87/6156/3688/7534/71/6122/2017/1072/4478/6222/6235/7414/928/6203/5478/3690/6136/6189/823/6155/60/3987/7739/6169/23603/6141/6132/3674/6188/6209/301/6218/3611/5094/387/998/7529/10109/5782/4869/91624/1601/6201/30845/2319/10971/6175/8650/9124/4267/6146/6205/2934/26986/58497/3312/5500/9349/7171/11261/2665/51164/10890/3313/9260/1213/6251/10092/309/11252/22800/10096/6208/6641/1785/58480/…	117
GOTERM_CC	GO:0044445	cytosolic part	68/2029	250/19659	3.61934e-14	6.46051e-12	6207/6156/3048/6122/3047/6135/6222/6235/6203/6136/6189/6155/6164/6152/6169/6141/6165/6132/6188/6209/6218/6224/6228/6161/6147/6154/834/1727/7311/6201/22948/6175/51065/26258/6146/6205/3312/8266/9349/9391/10574/9045/7917/10694/6208/2026/8517/63915/6125/54785/9451/3064/113251/440275/6134/5533/841/134957/79036/2395/84343/1977/23557/3257/3049/6159/25929/9175	68
GOTERM_CC	GO:0044391	ribosomal subunit	55/2029	191/19659	8.17955e-13	1.16804e-10	6207/6156/6122/6135/6222/6235/6203/6136/6189/6155/6164/6152/6169/6141/6165/6132/6188/6209/51258/6218/6224/6228/6161/6147/6154/7311/6201/51263/11222/6175/51065/6146/6205/55173/9349/23107/9045/60488/6208/64965/7818/10884/6182/4706/6125/64981/28973/113251/6134/84311/51264/51073/124995/6159/25929	55
GOTERM_CC	GO:0034774	secretory granule lumen	77/2029	321/19659	9.85394e-13	1.17262e-10	87/58485/2821/1191/7414/203068/6678/5478/5154/2162/10383/51411/351/5315/5627/5476/3615/3934/7057/26578/9588/51071/5683/1727/1950/2760/5834/2934/83706/10577/9861/3312/7076/6283/1521/2665/2717/5049/10694/353/9535/10092/64333/5719/5686/5473/4790/23406/3837/10916/54472/10490/55832/10097/5054/6727/7424/28988/5873/5196/7450/1265/7114/5594/51719/272/10855/3146/51097/2268/2720/3320/5689/2621/6279/6280/21…	77
GOTERM_CC	GO:0031091	platelet alpha granule	35/2029	91/19659	1.26997e-12	1.29537e-10	87/1191/928/6403/6678/3690/5154/2162/259215/340205/351/5627/3674/7057/51706/1950/94121/83706/7076/6845/948/5473/10916/10490/5054/7424/5196/7450/7114/10184/6622/51097/2621/5104/2157	35
GOTERM_CC	GO:0022626	cytosolic ribosome	40/2029	115/19659	1.47538e-12	1.31678e-10	6207/6156/6122/6135/6222/6235/6203/6136/6189/6155/6164/6152/6169/6141/6165/6132/6188/6209/6218/6224/6228/6161/6147/6154/7311/6201/6175/51065/6146/6205/9349/9045/6208/6125/9451/113251/440275/6134/6159/25929	40
GOTERM_CC	GO:0060205	cytoplasmic vesicle lumen	77/2029	338/19659	1.53612e-11	1.21865e-09	87/58485/2821/1191/7414/203068/6678/5478/5154/2162/10383/51411/351/5315/5627/5476/3615/3934/7057/26578/9588/51071/5683/1727/1950/2760/5834/2934/83706/10577/9861/3312/7076/6283/1521/2665/2717/5049/10694/353/9535/10092/64333/5719/5686/5473/4790/23406/3837/10916/54472/10490/55832/10097/5054/6727/7424/28988/5873/5196/7450/1265/7114/5594/51719/272/10855/3146/51097/2268/2720/3320/5689/2621/6279/6280/21…	77
GOTERM_CC	GO:0031983	vesicle lumen	77/2029	339/19659	1.79085e-11	1.27867e-09	87/58485/2821/1191/7414/203068/6678/5478/5154/2162/10383/51411/351/5315/5627/5476/3615/3934/7057/26578/9588/51071/5683/1727/1950/2760/5834/2934/83706/10577/9861/3312/7076/6283/1521/2665/2717/5049/10694/353/9535/10092/64333/5719/5686/5473/4790/23406/3837/10916/54472/10490/55832/10097/5054/6727/7424/28988/5873/5196/7450/1265/7114/5594/51719/272/10855/3146/51097/2268/2720/3320/5689/2621/6279/6280/21…	77
GOTERM_CC	GO:0005765	lysosomal membrane	77/2029	344/19659	3.80754e-11	2.47144e-09	51257/2782/6009/57153/1173/55004/3123/2040/5660/5476/968/1211/9550/5908/972/326624/54918/529/3108/2683/7311/1601/1950/23531/3122/3118/967/64114/3312/6845/56674/1213/4718/309/55255/51552/162/3117/4074/10490/223082/7107/3109/3119/3920/4905/2776/8904/4012/163/55353/54785/23317/55016/53346/1186/10948/7879/10542/79036/10855/10396/10053/912/54834/11342/23274/8905/4033/23557/8417/374395/26503/8131/8876/…	77
GOTERM_CC	GO:0098852	lytic vacuole membrane	77/2029	345/19659	4.41634e-11	2.61474e-09	51257/2782/6009/57153/1173/55004/3123/2040/5660/5476/968/1211/9550/5908/972/326624/54918/529/3108/2683/7311/1601/1950/23531/3122/3118/967/64114/3312/6845/56674/1213/4718/309/55255/51552/162/3117/4074/10490/223082/7107/3109/3119/3920/4905/2776/8904/4012/163/55353/54785/23317/55016/53346/1186/10948/7879/10542/79036/10855/10396/10053/912/54834/11342/23274/8905/4033/23557/8417/374395/26503/8131/8876/…	77
GOTERM_CC	GO:0005840	ribosome	66/2029	276/19659	4.76073e-11	2.61474e-09	6207/6156/6122/6135/6222/6235/6203/6136/6189/6155/6164/6152/6169/6141/6165/6132/6188/6209/51258/6218/6224/6228/6161/6147/6154/7311/6201/51263/11222/6175/51065/6146/6205/55173/9349/23107/9045/60488/8562/6208/64965/7818/10884/7536/55854/6182/4706/6125/64981/28973/9451/113251/440275/6134/55319/84311/134218/51264/6622/51073/124995/821/55037/6159/25929/328	66
GOTERM_CC	GO:0010008	endosome membrane	94/2029	462/19659	7.79171e-11	3.97377e-09	51257/1173/55004/80230/3123/8766/54741/968/301/5872/1211/9784/5867/54918/3108/1182/80762/7311/30845/6642/23531/3122/6643/3118/967/51160/11031/64114/54521/5874/6845/221472/2060/27243/27131/10890/285195/56674/51104/51652/84313/7251/23527/1213/200576/309/11252/9375/5045/51552/5912/3117/9743/25978/51510/10490/223082/55198/3109/51762/55041/10454/3119/3920/163/5873/55353/23317/55016/51135/3133/150684/1…	94
GOTERM_CC	GO:0005774	vacuolar membrane	84/2029	397/19659	1.04728e-10	4.98503e-09	81631/51257/2782/11345/6009/57153/1173/55004/3123/2040/5660/5476/968/1211/9550/5908/972/9296/326624/54918/529/3108/2683/7311/1601/1950/23531/3122/3118/967/64114/3312/6845/56674/1213/4718/309/8775/55255/10241/51552/162/3117/64121/4074/10490/223082/7107/3109/3119/3920/4905/2776/8904/4012/163/55353/54785/23317/55016/53346/1186/10948/7879/10542/79036/10855/10396/10053/912/54834/11342/23274/8905/4033/…	84
GOTERM_CC	GO:1904813	ficolin-1-rich granule lumen	38/2029	124/19659	3.78836e-10	1.69056e-08	2495/51646/2821/7414/5478/823/51411/5315/3615/26578/51071/5683/427/4048/2934/9861/3312/5049/10694/9535/10092/5719/5686/23406/3837/55832/10097/6727/28988/5236/5594/51719/272/3146/2720/23412/3320/5689	38
GOTERM_CC	GO:0043209	myelin sheath	43/2029	162/19659	3.98235e-09	1.67259e-07	3688/71/805/2821/4478/2782/2752/10383/5315/2664/83700/7846/5037/6647/30845/22948/801/2934/760/1743/3312/4191/5250/2665/10935/7417/7284/9948/8775/231/377677/2026/4905/10100/5962/10963/4719/5898/821/1759/5590/10397/3320	43
GOTERM_CC	GO:0030667	secretory granule membrane	64/2029	295/19659	6.25562e-09	2.4814e-07	928/6403/6678/3690/57153/10857/55004/8655/2040/5660/259215/968/3674/387/258010/6515/5908/6813/326624/54918/10257/5023/2683/4893/51706/2319/1315/94121/961/196527/967/11031/64114/5874/6845/10959/3708/948/10890/5269/5795/4718/51552/5912/682/858/3920/8904/22931/5873/23317/8773/11336/10184/952/7879/5869/10396/6622/932/4033/374395/8876/5104	64
GOTERM_CC	GO:0101002	ficolin-1-rich granule	46/2029	185/19659	1.09215e-08	4.10417e-07	2495/51646/2821/7414/5478/55004/8655/823/51411/5315/3615/387/6515/26578/51071/5683/427/4048/1315/2934/9861/3312/5049/5269/10694/9535/10092/5719/5686/23406/3837/55832/10097/3920/6727/28988/5236/5594/51719/272/3146/374395/2720/23412/3320/5689	46
GOTERM_CC	GO:0005819	spindle	68/2029	333/19659	2.78274e-08	9.71575e-07	3796/51646/805/2017/8655/653784/8766/351/6188/1211/998/79718/8555/8409/4869/7443/282809/801/140609/348235/22832/22920/9391/27339/51164/23157/5607/54820/5925/5516/1213/996/23122/83541/891/8517/10927/81565/79848/9181/1499/3297/10982/8881/11073/7175/5594/989/3832/152185/8243/8658/4033/8452/8502/51115/9657/55968/26586/8556/9857/9735/9787/54930/259266/3192/56992/55112	68
GOTERM_CC	GO:0022625	cytosolic large ribosomal subunit	23/2029	63/19659	2.85757e-08	9.71575e-07	6156/6122/6135/6136/6155/6164/6152/6169/6141/6165/6132/6161/6147/6154/7311/6175/6146/9349/9045/6125/6134/6159/25929	23
GOTERM_CC	GO:0015934	large ribosomal subunit	34/2029	121/19659	3.58291e-08	1.16282e-06	6156/6122/6135/6136/6155/6164/6152/6169/6141/6165/6132/51258/6161/6147/6154/7311/51263/11222/6175/6146/9349/9045/10884/6182/4706/6125/64981/6134/84311/51264/51073/124995/6159/25929	34
GOTERM_CC	GO:0015629	actin cytoskeleton	89/2029	483/19659	3.86032e-08	1.19838e-06	2316/29780/87/71/2017/1072/4637/7414/2039/30851/60/7739/23603/51411/301/3611/4638/57180/2534/140735/10109/5782/10093/2319/10398/2934/83706/2533/7170/55752/3183/11344/7171/829/51164/395/9578/7456/9260/4482/9948/10540/8436/10092/23002/10625/10096/23607/10801/136319/58480/9743/6710/10095/10787/9181/3005/10097/6714/22885/28988/64098/5236/7429/274/29766/7125/1265/5962/11073/118/989/4983/6622/10603/226…	89
GOTERM_CC	GO:0005759	mitochondrial matrix	85/2029	462/19659	8.35133e-08	2.48452e-06	6648/11315/6188/51258/2108/598/81689/29920/6647/708/2876/25824/27292/51263/56953/11222/5165/10797/3030/7019/7263/1743/2936/55173/4191/3028/23107/91689/4714/60488/2746/10935/3313/7417/7284/57805/5859/10128/8801/2109/64965/7818/10884/5018/6182/891/6059/8050/4706/3421/57128/10667/64981/55347/4200/84274/28973/133686/5019/4285/34/84311/4719/5095/284486/80222/51264/6622/2395/51073/131118/124995/1763/55…	85
GOTERM_CC	GO:0031092	platelet alpha granule membrane	11/2029	17/19659	9.45672e-08	2.70084e-06	928/6403/6678/3690/259215/3674/51706/94121/948/10184/6622	11
GOTERM_CC	GO:0036464	cytoplasmic ribonucleoprotein granule	47/2029	207/19659	1.51679e-07	4.16535e-06	4904/203068/4154/60/998/7846/26065/5683/5687/54542/6175/580/1025/7072/26986/219988/9337/348262/23112/27258/79752/3837/84324/5936/27257/22927/197135/26019/29883/5685/1653/113802/5395/23369/170506/80153/113251/4848/1994/27161/1977/140564/6607/8761/677/3192/9575	47
GOTERM_CC	GO:0035770	ribonucleoprotein granule	48/2029	219/19659	3.45491e-07	9.13633e-06	4904/203068/4154/60/998/7846/26065/5683/5687/54542/6175/580/1025/7072/26986/219988/9337/348262/23112/27258/79752/3837/84324/5936/27257/3297/22927/197135/26019/29883/5685/1653/113802/5395/23369/170506/80153/113251/4848/1994/27161/1977/140564/6607/8761/677/3192/9575	48
GOTERM_CC	GO:0031093	platelet alpha granule lumen	22/2029	67/19659	4.88418e-07	1.24547e-05	87/1191/6678/5154/2162/351/5627/7057/1950/83706/7076/5473/10916/10490/5054/7424/5196/7450/7114/51097/2621/2157	22
GOTERM_CC	GO:0005766	primary lysosome	37/2029	155/19659	8.54428e-07	2.03354e-05	58485/203068/55004/10383/2040/5660/5476/968/5908/6813/326624/54918/9588/2683/1727/2760/967/5834/10577/6845/2665/2717/10694/4718/54472/10097/3920/8904/23317/8773/5594/10396/4033/8417/374395/8876/2720	37
GOTERM_CC	GO:0042582	azurophil granule	37/2029	155/19659	8.54428e-07	2.03354e-05	58485/203068/55004/10383/2040/5660/5476/968/5908/6813/326624/54918/9588/2683/1727/2760/967/5834/10577/6845/2665/2717/10694/4718/54472/10097/3920/8904/23317/8773/5594/10396/4033/8417/374395/8876/2720	37
GOTERM_CC	GO:0030136	clathrin-coated vesicle	40/2029	180/19659	2.21219e-06	5.09517e-05	85439/928/1173/3123/26119/10134/1211/972/4900/1601/1950/8650/8301/3122/3118/3312/5874/6845/2060/1213/5045/51552/162/1785/3117/4074/9685/51762/3119/163/28988/5873/917/7450/1856/10053/22876/9779/7851/6571	40
GOTERM_CC	GO:0015935	small ribosomal subunit	22/2029	73/19659	2.50618e-06	5.59191e-05	6207/6222/6235/6203/6189/6188/6209/6218/6224/6228/7311/6201/51065/6205/55173/23107/60488/6208/64965/7818/28973/113251	22
GOTERM_CC	GO:0002102	podosome	13/2029	30/19659	3.20365e-06	6.93153e-05	2017/7414/51411/5782/2934/83706/7171/9948/58480/9181/10097/6714/28988	13
GOTERM_CC	GO:0098798	mitochondrial protein complex	53/2029	271/19659	3.56906e-06	7.49503e-05	7388/11315/51258/4698/51263/11222/3030/4713/100188893/55173/10367/7381/3028/23107/91689/4714/60488/4724/55013/54539/4718/9167/8801/401505/4696/64965/7818/10884/54927/6182/4706/4702/64981/6391/28973/4711/84311/4719/51264/6622/51073/131118/124995/1763/100652748/26517/4720/1629/5163/4704/6832/29103/440567	53
GOTERM_CC	GO:0022627	cytosolic small ribosomal subunit	16/2029	45/19659	5.45126e-06	0.000111206	6207/6222/6235/6203/6189/6188/6209/6218/6224/6228/7311/6201/51065/6205/6208/113251	16
GOTERM_CC	GO:0099023	tethering complex	20/2029	66/19659	6.46552e-06	0.000128233	58485/998/23355/10890/51542/27095/738/100128327/6399/51594/60684/11336/7109/22878/55770/64400/60561/7127/91949/57511	20
GOTERM_CC	GO:0005770	late endosome	48/2029	243/19659	7.62646e-06	0.00014717	55004/3123/8766/972/7852/3108/1182/2149/5289/23531/3122/967/51160/3312/5874/6845/27243/4077/285195/88455/51652/7251/200576/309/973/51552/4534/25978/4074/10490/3109/5641/3920/6714/57498/5873/55353/55016/5604/3064/5594/10948/7879/10542/5595/11342/23274/8417	48
GOTERM_CC	GO:0030133	transport vesicle	67/2029	381/19659	9.32129e-06	0.00017504	85439/3123/8766/598/1211/5867/972/1182/5037/4900/8301/1315/3122/94121/801/26258/30061/3118/163882/5874/6845/10959/3708/11261/10961/23423/10890/23157/5413/7417/1213/203547/79772/1176/127262/9276/6856/5045/51128/51552/3117/4074/858/10490/81565/63915/51762/3119/5873/274/3133/10987/5869/134957/6622/10484/23557/11014/8417/10059/3134/26503/1759/10427/83464/84958/6571	67
GOTERM_CC	GO:0030135	coated vesicle	53/2029	280/19659	9.56103e-06	0.00017504	85439/928/1173/3123/26119/351/10134/1211/972/4900/1601/1950/8650/8301/1315/3122/3118/3312/5874/6845/2060/10959/23423/1213/203547/9276/5045/51128/51552/162/1785/3117/4074/10490/9685/51762/3119/163/28988/5873/917/7450/1856/3133/10484/10053/22876/9779/3134/10427/7851/6571/2157	53
GOTERM_CC	GO:0016607	nuclear speck	67/2029	382/19659	1.01873e-05	0.000181843	4354/80230/10933/80145/6431/93663/6915/580/665/10521/51631/25962/219988/9802/11052/80196/27339/4303/7307/4000/9263/1647/11252/9092/9939/57187/84324/26235/5936/102724594/22927/10454/8930/56339/9158/29883/3603/23451/23326/170506/79872/25936/25898/8446/54439/34/8394/23091/26051/6651/91746/7486/22938/10401/26959/55105/5930/10772/374395/64077/51322/51755/8106/3192/6929/328/57109	67
GOTERM_CC	GO:1905368	peptidase complex	24/2029	91/19659	1.16726e-05	0.000201269	5688/5691/60559/5683/5720/5687/7337/9861/5887/130617/90637/5719/5686/197131/5685/23326/5694/9789/6883/27429/5715/55578/2155/5689	24
GOTERM_CC	GO:0000151	ubiquitin ligase complex	52/2029	275/19659	1.19044e-05	0.000201269	51646/9246/84333/26994/10048/55294/25793/580/11059/648/3312/64795/51433/3301/25853/7324/54461/54467/57563/25847/996/25897/55031/84246/80012/8517/54165/26235/80204/55832/6468/7334/90390/8697/197131/54876/130507/8881/10299/79872/25898/150684/196394/51185/54800/8816/23032/79269/57688/8452/11065/23142	52
GOTERM_CC	GO:0005681	spliceosomal complex	38/2029	179/19659	1.21212e-05	0.000201269	4904/6009/3178/153527/6638/51691/2483/26986/51631/8233/56259/3312/3183/27339/7307/27258/57805/9092/10625/9939/7536/53938/27316/4809/102724594/10236/23451/55285/25980/22938/8896/51645/9716/3187/3181/1655/51322/3192	38
GOTERM_CC	GO:0035577	azurophil granule membrane	18/2029	58/19659	1.28489e-05	0.000208503	55004/2040/5660/968/5908/326624/54918/2683/967/6845/4718/3920/8904/23317/10396/4033/374395/8876	18
GOTERM_CC	GO:0071556	integral component of lumenal side of endoplasmic reticulum membrane	12/2029	29/19659	1.36727e-05	0.000212224	3123/10134/972/6892/3122/121665/3118/3117/3119/3133/821/3134	12
GOTERM_CC	GO:0098553	lumenal side of endoplasmic reticulum membrane	12/2029	29/19659	1.36727e-05	0.000212224	3123/10134/972/6892/3122/121665/3118/3117/3119/3133/821/3134	12
GOTERM_CC	GO:0000922	spindle pole	34/2029	154/19659	1.43526e-05	0.000214695	3796/51646/805/8766/8409/4869/282809/801/140609/51164/54820/5516/83541/891/8517/79848/1499/3297/11073/3832/8243/8658/4033/8452/8502/51115/55968/26586/8556/9735/9787/259266/3192/55112	34
GOTERM_CC	GO:1990204	oxidoreductase complex	27/2029	110/19659	1.44333e-05	0.000214695	7388/11315/4698/4713/1743/7381/4714/4724/2820/54539/4718/4696/8050/4706/4702/5033/6391/4711/4719/6622/4720/1629/55526/5163/4704/440567/5034	27
GOTERM_CC	GO:0030662	coated vesicle membrane	37/2029	174/19659	1.50867e-05	0.000219835	928/1173/3123/26119/1211/972/4900/1601/1950/8301/1315/3122/3118/3312/6845/2060/10959/23423/1213/203547/9276/51128/162/3117/4074/10490/3119/163/28988/917/3133/10484/10053/9779/3134/10427/6571	37
GOTERM_CC	GO:0030027	lamellipodium	39/2029	188/19659	1.64755e-05	0.00023527	29780/3688/2017/1072/3690/23603/351/5872/3611/4638/387/10109/2319/6642/6643/2934/11344/6845/221472/10810/9578/10092/10096/10006/1785/10787/1499/10097/22885/28988/7429/9459/5962/8394/8874/54434/5747/22902/57630	39
GOTERM_CC	GO:0005746	mitochondrial respiratory chain	24/2029	93/19659	1.73637e-05	0.000243092	7388/11315/4698/4713/7381/4714/23530/4724/54539/4718/9167/4696/5018/4706/4702/6834/6391/4711/4719/1355/6622/4720/4704/440567	24
GOTERM_CC	GO:0098687	chromosomal region	61/2029	346/19659	2.1251e-05	0.000291792	8366/8655/80145/8367/54386/8363/6672/55320/3018/8365/348235/7515/5500/4175/23279/51164/9555/23157/54820/5516/5885/10540/23244/4172/472/23028/80335/57187/23122/891/9918/81565/1616/27309/3297/23064/1786/55746/170506/25936/5000/3020/7514/7175/3070/989/7486/151246/1017/1763/8243/5591/8658/11144/3181/9735/56897/3192/25913/328/57082	61
GOTERM_CC	GO:0030665	clathrin-coated vesicle membrane	26/2029	107/19659	2.4956e-05	0.000336199	928/1173/3123/26119/1211/972/4900/1601/1950/8301/3122/3118/3312/6845/2060/1213/162/3117/4074/3119/163/28988/917/10053/9779/6571	26
GOTERM_CC	GO:0005885	Arp2/3 protein complex	7/2029	11/19659	2.79918e-05	0.000370114	57180/10109/10093/10092/10096/10095/10097	7
GOTERM_CC	GO:0032432	actin filament bundle	19/2029	67/19659	3.10896e-05	0.0004036	87/3611/4638/10398/7170/55752/7171/51164/9260/23002/10801/22885/7429/1265/989/10603/5358/5747/5590	19
GOTERM_CC	GO:0005844	polysome	20/2029	73/19659	3.36747e-05	0.000429352	6156/6135/6235/6152/6169/6141/6132/6188/6228/6161/5687/2521/55854/26019/113251/440275/60560/27161/51389/10445	20
GOTERM_CC	GO:0032993	protein-DNA complex	40/2029	201/19659	3.54098e-05	0.000443554	4149/85236/4778/8366/8970/8334/8339/8340/8367/3013/8969/3015/54386/8363/4869/3018/8338/8349/8365/8343/27339/4800/9555/8357/4172/5422/1499/3005/257218/57804/2960/3020/54145/84250/7486/5814/3087/5591/56897/25913	40
GOTERM_CC	GO:0070469	respiratory chain	25/2029	103/19659	3.61843e-05	0.000445441	7388/11315/4698/25994/4713/7381/4714/23530/4724/54539/4718/9167/4696/5018/4706/4702/6834/6391/4711/4719/1355/6622/4720/4704/440567	25
GOTERM_CC	GO:0030176	integral component of endoplasmic reticulum membrane	32/2029	149/19659	4.50622e-05	0.000545329	23770/3123/10134/267/972/79993/6892/3122/23471/3638/121665/3118/7095/9694/84236/23204/259230/3117/54020/83460/60481/3119/9451/10299/51283/3133/6252/821/80856/51000/3134/55161	32
GOTERM_CC	GO:0071013	catalytic step 2 spliceosome	22/2029	87/19659	5.36565e-05	0.000638512	3178/6638/2483/26986/3183/27339/7307/27258/9092/9939/53938/27316/10236/23451/22938/8896/51645/9716/3187/3181/1655/3192	22
GOTERM_CC	GO:0042470	melanosome	25/2029	106/19659	6.02905e-05	0.00069326	3688/7534/3690/4673/2040/7529/967/1200/3312/10981/5874/10961/1213/309/6856/682/5873/7879/5869/821/55161/10672/84958/3320/5034	25
GOTERM_CC	GO:0048770	pigment granule	25/2029	106/19659	6.02905e-05	0.00069326	3688/7534/3690/4673/2040/7529/967/1200/3312/10981/5874/10961/1213/309/6856/682/5873/7879/5869/821/55161/10672/84958/3320/5034	25
GOTERM_CC	GO:0030008	TRAPP complex	7/2029	12/19659	6.117e-05	0.00069326	58485/27095/100128327/6399/60684/7109/22878	7
GOTERM_CC	GO:0001725	stress fiber	17/2029	59/19659	6.4249e-05	0.00070575	87/3611/4638/10398/7170/55752/7171/51164/9260/23002/10801/22885/1265/989/10603/5747/5590	17
GOTERM_CC	GO:0097517	contractile actin filament bundle	17/2029	59/19659	6.4249e-05	0.00070575	87/3611/4638/10398/7170/55752/7171/51164/9260/23002/10801/22885/1265/989/10603/5747/5590	17
GOTERM_CC	GO:0031252	cell leading edge	65/2029	390/19659	6.91201e-05	0.000744506	29780/87/3688/2017/1072/3690/23603/351/6188/5872/3611/4638/387/9750/7852/10109/2319/6642/6643/2934/117178/11344/6845/221472/27131/10810/9578/7456/9260/5795/10092/11252/10096/23607/10006/4534/1785/23122/81565/10787/9181/1499/10097/6714/22885/28988/7429/286/5341/9459/5962/114609/8394/8861/10603/2268/7094/8874/54434/5747/22902/57630/59338/5590/9788	65
GOTERM_CC	GO:0030139	endocytic vesicle	52/2029	293/19659	6.98626e-05	0.000744506	71/928/6678/1173/3123/8766/5872/1211/972/6813/1182/7311/30845/2319/6892/5289/8301/3122/6850/3118/2934/11031/10981/6845/2060/948/10890/1213/23607/51552/1785/3117/51735/51762/3119/3920/163/8773/1856/114609/3133/7879/5869/22876/5287/5898/8417/9779/817/3134/9788/3320	52
GOTERM_CC	GO:0042641	actomyosin	19/2029	71/19659	7.45884e-05	0.000783178	87/3611/4638/10398/7170/55752/7171/51164/9578/9260/9948/23002/10801/22885/1265/989/10603/5747/5590	19
GOTERM_CC	GO:0042613	MHC class II protein complex	8/2029	16/19659	7.62799e-05	0.000789331	3123/972/3108/3122/3118/3117/3109/3119	8
GOTERM_CC	GO:0010494	cytoplasmic stress granule	17/2029	60/19659	8.11109e-05	0.000827331	4904/4154/26065/7072/26986/348262/79752/3837/5936/22927/1653/23369/170506/113251/1994/1977/8761	17
GOTERM_CC	GO:1905369	endopeptidase complex	18/2029	66/19659	8.75195e-05	0.000880126	5688/5691/5683/5720/5687/7337/9861/5887/130617/90637/5719/5686/197131/5685/5694/27429/5715/5689	18
GOTERM_CC	GO:0005769	early endosome	58/2029	341/19659	9.43098e-05	0.000935239	80230/26119/351/6478/301/9784/5867/54918/26994/7852/9910/1182/8073/2149/8650/8301/6642/6643/51160/11031/10981/23355/221472/2060/27131/10935/56674/57590/7251/200576/11252/51552/10490/55198/9100/4012/28988/55353/23317/55016/5604/51019/29934/3133/5594/150684/729873/5869/81614/23161/22876/5595/3146/8417/3134/123606/10079/6477	58
GOTERM_CC	GO:0042611	MHC protein complex	10/2029	25/19659	0.000101898	0.000996645	3123/972/3108/3122/3118/3117/3109/3119/3133/3134	10
GOTERM_CC	GO:0031227	intrinsic component of endoplasmic reticulum membrane	32/2029	157/19659	0.000128924	0.00122728	23770/3123/10134/267/972/79993/6892/3122/23471/3638/121665/3118/7095/9694/84236/23204/259230/3117/54020/83460/60481/3119/9451/10299/51283/3133/6252/821/80856/51000/3134/55161	32
GOTERM_CC	GO:0005747	mitochondrial respiratory chain complex I	15/2029	51/19659	0.000132353	0.00122728	11315/4698/4713/4714/4724/54539/4718/4696/4706/4702/4711/4719/6622/4720/4704	15
GOTERM_CC	GO:0030964	NADH dehydrogenase complex	15/2029	51/19659	0.000132353	0.00122728	11315/4698/4713/4714/4724/54539/4718/4696/4706/4702/4711/4719/6622/4720/4704	15
GOTERM_CC	GO:0045271	respiratory chain complex I	15/2029	51/19659	0.000132353	0.00122728	11315/4698/4713/4714/4724/54539/4718/4696/4706/4702/4711/4719/6622/4720/4704	15
GOTERM_CC	GO:0005743	mitochondrial inner membrane	73/2029	463/19659	0.000156676	0.00142073	25915/7388/11315/6188/51258/4698/598/25994/1384/5321/51263/11222/3030/4713/55173/10367/7381/23107/91689/5250/4714/60488/8760/23530/4724/55013/51629/2820/54539/4718/63933/51300/9167/4696/54977/64965/7818/10884/54927/5018/6182/4706/29957/4702/64981/6834/6714/84274/6391/28973/4711/23456/84311/4719/1355/51264/6622/51073/131118/124995/8034/55863/10165/2268/55037/100652748/26517/4720/9941/57380/4704/29…	73
GOTERM_CC	GO:0045334	clathrin-coated endocytic vesicle	17/2029	63/19659	0.000157196	0.00142073	928/1173/3123/1211/972/8301/3122/3118/2060/1213/1785/3117/3119/163/1856/22876/9779	17
GOTERM_CC	GO:0044452	nucleolar part	35/2029	180/19659	0.000170668	0.00152321	30851/1936/1601/2091/3988/221895/51386/55272/80709/5049/51096/5440/5434/55536/84280/9743/4809/10892/7334/55127/8161/55813/8446/8731/134430/125476/84135/9419/10885/51082/26517/84916/51755/55578/22858	35
GOTERM_CC	GO:0001726	ruffle	33/2029	167/19659	0.00018873	0.00166362	87/3688/2017/1072/3690/6188/387/2934/221472/27131/7456/9260/5795/11252/23607/4534/1785/23122/10787/9181/6714/28988/7429/5341/5962/114609/8394/10603/2268/7094/8874/59338/9788	33
GOTERM_CC	GO:0031902	late endosome membrane	27/2029	127/19659	0.000204425	0.00178	55004/3123/3108/1182/23531/3122/967/51160/5874/6845/27243/285195/51652/7251/200576/309/25978/10490/3109/3920/5873/55353/55016/10948/7879/10542/11342	27
GOTERM_CC	GO:0005635	nuclear envelope	72/2029	461/19659	0.000231294	0.00198968	2597/4904/55120/489/203068/1192/54498/351/598/2781/54386/5023/8815/2879/29956/665/307/23299/83699/23039/27243/23279/3708/51096/4000/10128/3836/57110/7112/5422/3837/5108/10927/81565/5903/22929/2776/8904/664/123920/23190/9818/274/9782/23369/55746/26509/7514/7175/10553/5130/23633/6622/5595/11342/10526/727851/124491/10390/8658/4033/10885/55161/129401/11269/55706/729540/54894/5590/55151/22932/83990	72
GOTERM_CC	GO:0000502	proteasome complex	17/2029	65/19659	0.000237388	0.0020178	5688/5691/5683/5720/5687/7337/9861/5887/130617/90637/5719/5686/197131/5685/5694/5715/5689	17
GOTERM_CC	GO:0044455	mitochondrial membrane part	42/2029	234/19659	0.000259136	0.00217674	7388/11315/4698/1374/51024/4713/100188893/10367/7381/91689/5250/4714/9927/23530/4724/55013/54539/4718/63933/9167/401505/4696/54927/5018/4706/4702/6834/84274/664/6391/4711/23456/4719/1355/6622/131118/100652748/4720/4704/29103/54332/440567	42
GOTERM_CC	GO:0000781	chromosome, telomeric region	31/2029	158/19659	0.000331368	0.00275113	8366/80145/8367/54386/8363/6672/3018/8365/7515/5500/4175/9555/4172/472/23028/80335/57187/23064/170506/5000/3020/7486/1017/1763/5591/8658/11144/3181/56897/25913/328	31
GOTERM_CC	GO:0061695	transferase complex, transferring phosphorus-containing groups	45/2029	259/19659	0.00033827	0.00277615	1032/896/5315/5573/5289/219771/8725/1025/2958/4217/5440/5925/2957/5434/5257/4172/55255/5422/5291/891/8517/6874/6873/80349/57804/6882/9519/2960/51728/51719/4331/22938/56655/5287/6883/5565/1017/1763/51082/9779/51755/902/54619/9175/1154	45
GOTERM_CC	GO:0030669	clathrin-coated endocytic vesicle membrane	13/2029	44/19659	0.000348744	0.00282958	928/1173/3123/972/8301/3122/3118/2060/1213/3117/3119/163/9779	13
GOTERM_CC	GO:0005874	microtubule	65/2029	414/19659	0.000393019	0.00315299	3796/7277/805/81631/26052/83658/203068/8655/10383/8766/51807/7846/140735/56890/22948/801/84617/140609/1808/3925/348235/57606/22832/22920/10574/84790/85462/10694/54820/1213/10540/10128/283349/996/10801/81027/1785/23122/81565/79848/9181/10982/58526/8881/10513/25941/3832/3801/6905/27067/8452/55346/51115/10059/26586/1759/636/643246/9735/1155/54930/259266/3192/56992/10397	65
GOTERM_CC	GO:0000786	nucleosome	23/2029	106/19659	0.000431086	0.00341995	85236/8366/8970/8334/8339/8340/8367/3013/8969/3015/8363/3018/8338/8349/8365/8343/9555/8357/3005/257218/3020/54145/84250	23
GOTERM_CC	GO:0044815	DNA packaging complex	24/2029	114/19659	0.000522241	0.00409758	85236/8366/8970/8334/8339/8340/8367/3013/8969/3015/8363/3018/8338/8349/8365/8343/9555/8357/9918/3005/257218/3020/54145/84250	24
GOTERM_CC	GO:0019908	nuclear cyclin-dependent protein kinase holoenzyme complex	6/2029	12/19659	0.000639288	0.00493081	1025/5925/4331/22938/51755/902	6
GOTERM_CC	GO:0000307	cyclin-dependent protein kinase holoenzyme complex	12/2029	41/19659	0.000642248	0.00493081	1032/896/219771/1025/5925/891/4331/22938/1017/51755/902/54619	12
GOTERM_CC	GO:0032588	trans-Golgi network membrane	20/2029	90/19659	0.000721942	0.00548369	3123/351/1211/972/3122/3118/11031/51542/1213/738/162/3117/4074/3119/22836/55016/10053/8905/91949/57511	20
GOTERM_CC	GO:0005839	proteasome core complex	8/2029	21/19659	0.00075172	0.00564977	5688/5691/5683/5687/5686/5685/5694/5689	8
GOTERM_CC	GO:0042788	polysomal ribosome	10/2029	31/19659	0.00077535	0.00576667	6156/6135/6235/6152/6169/6141/6132/6228/6161/55854	10
GOTERM_CC	GO:0005938	cell cortex	48/2029	292/19659	0.000789728	0.00577394	2316/2017/1072/2039/4354/51411/120/1211/56288/387/998/80762/2319/10539/2934/1487/55752/7171/829/51164/10890/23157/5413/7456/9948/389/10801/58480/23122/9743/6710/1499/10097/22836/28988/11336/5962/989/6622/55770/8874/7127/23048/5747/5590/51057/55188/3927	48
GOTERM_CC	GO:0000784	nuclear chromosome, telomeric region	25/2029	124/19659	0.000792502	0.00577394	8366/80145/8367/54386/8363/6672/3018/8365/7515/5500/4175/9555/4172/472/23028/80335/57187/5000/3020/1763/5591/8658/56897/25913/328	25
GOTERM_CC	GO:0055037	recycling endosome	31/2029	167/19659	0.000884083	0.00637612	3688/26119/8766/5872/5867/54918/26994/7846/30845/10890/285195/51104/79772/11252/738/51552/5912/10490/51762/55041/3133/150684/51201/201627/22876/79735/8417/3134/55610/10079/10397	31
GOTERM_CC	GO:0031970	organelle envelope lumen	19/2029	85/19659	0.000899191	0.00638618	203068/11315/351/6647/4713/10367/153768/51012/57110/26235/4702/4719/57019/6622/27429/84269/2268/26517/57001	19
GOTERM_CC	GO:0005876	spindle microtubule	14/2029	54/19659	0.000903368	0.00638618	3796/805/8766/801/348235/22920/1213/996/23122/8881/3832/8452/9735/3192	14
GOTERM_CC	GO:0032040	small-subunit processome	11/2029	37/19659	0.000926918	0.00648843	6201/2091/55272/51096/4809/55127/55813/134430/10885/10813/84916	11
GOTERM_CC	GO:0016282	eukaryotic 43S preinitiation complex	7/2029	17/19659	0.000942429	0.00653296	10289/10209/8665/51386/8663/8669/27335	7
GOTERM_CC	GO:0070382	exocytic vesicle	35/2029	197/19659	0.000976037	0.00670087	85439/598/1211/5867/1182/5037/8301/94121/801/30061/5874/6845/10890/23157/5413/7417/79772/127262/6856/10490/81565/51762/5873/274/10987/5869/134957/6622/23557/8417/10059/26503/1759/84958/6571	35
GOTERM_CC	GO:0030117	membrane coat	21/2029	99/19659	0.00102342	0.0068936	1173/1211/8301/1315/132320/2060/27243/23423/1213/1176/9276/51128/162/163/10484/10053/8905/9779/1759/10427/10947	21
GOTERM_CC	GO:0048475	coated membrane	21/2029	99/19659	0.00102342	0.0068936	1173/1211/8301/1315/132320/2060/27243/23423/1213/1176/9276/51128/162/163/10484/10053/8905/9779/1759/10427/10947	21
GOTERM_CC	GO:0098978	glutamatergic synapse	55/2029	350/19659	0.00103445	0.0069028	2316/87/3688/7534/26052/6678/3690/60/8766/387/2534/140735/10109/708/5023/4900/2319/5575/5573/8650/55327/1487/55752/3312/5577/2060/10810/5532/51104/27020/11252/8775/3836/25897/1785/25978/54476/9181/6714/163/22885/5533/1994/80758/4983/5062/821/8526/1977/1759/7525/8404/5590/10397/7533	55
GOTERM_CC	GO:0001650	fibrillar center	26/2029	134/19659	0.00114183	0.00754876	30851/1936/1601/2091/3988/221895/51386/80709/5049/55536/84280/9743/10892/7334/55127/8161/8446/8731/125476/84135/9419/26517/84916/51755/55578/22858	26
GOTERM_CC	GO:0072686	mitotic spindle	21/2029	101/19659	0.00133824	0.00876607	51646/2017/8655/6188/998/79718/8555/1213/23122/8517/3297/7175/5594/3832/8243/8658/8502/9657/8556/259266/3192	21
GOTERM_CC	GO:0098803	respiratory chain complex	19/2029	88/19659	0.00139576	0.00903773	7388/11315/4698/4713/7381/4714/4724/54539/4718/4696/4706/4702/6391/4711/4719/6622/4720/4704/440567	19
GOTERM_CC	GO:0070993	translation preinitiation complex	7/2029	18/19659	0.00140561	0.00903773	10289/10209/8665/51386/8663/8669/27335	7
GOTERM_CC	GO:0031901	early endosome membrane	27/2029	143/19659	0.00141768	0.00903773	80230/301/5867/54918/1182/6642/6643/11031/221472/2060/27131/56674/7251/200576/51552/10490/55198/23317/55016/3133/729873/5869/23161/22876/8417/3134/10079	27
GOTERM_CC	GO:0098589	membrane region	50/2029	316/19659	0.00146666	0.00926722	3688/3098/10666/203068/3945/11315/55004/2040/23603/351/64805/120/2534/7846/5023/2149/1445/2319/5573/23299/5577/5230/948/3162/200576/8436/11252/27040/5045/973/5912/682/858/5903/1499/3920/6714/26509/7514/5594/1947/118/5519/10542/841/10855/5595/6532/7851/5590	50
GOTERM_CC	GO:0098800	inner mitochondrial membrane protein complex	27/2029	144/19659	0.00157685	0.00987607	7388/11315/4698/4713/10367/7381/91689/4714/4724/55013/54539/4718/9167/4696/54927/4706/4702/6391/4711/4719/6622/131118/100652748/4720/4704/29103/440567	27
GOTERM_CC	GO:0098984	neuron to neuron synapse	53/2029	342/19659	0.00172668	0.0107204	6207/6156/7534/6222/26052/2039/6009/6136/6169/6132/120/6188/2534/140735/4900/5575/6175/55327/55752/9349/6845/8440/9045/3708/51104/27020/9829/3836/6208/25897/10006/1785/9743/25978/9181/1499/10097/6714/4905/28988/664/53335/5594/118/80758/9465/5062/1266/9419/8502/1759/26037/5590	53
GOTERM_CC	GO:0055038	recycling endosome membrane	17/2029	77/19659	0.00188982	0.0116321	8766/5872/5867/54918/30845/10890/51104/11252/51552/5912/10490/51762/55041/3133/51201/3134/10397	17
GOTERM_CC	GO:0030660	Golgi-associated vesicle membrane	22/2029	111/19659	0.00199445	0.0121713	3123/1211/972/4900/1315/3122/121665/3118/10959/23423/1213/203547/9276/51128/3117/10490/3119/3133/10484/9445/3134/10427	22
GOTERM_CC	GO:0000932	P-body	18/2029	84/19659	0.00201357	0.0121838	26065/5683/5687/54542/219988/9337/23112/27258/27257/197135/29883/5685/80153/4848/27161/1977/140564/677	18
GOTERM_CC	GO:0000790	nuclear chromatin	56/2029	369/19659	0.0021091	0.0126546	4149/8366/60/8334/10933/8367/3013/8969/3015/8363/8338/1025/55274/8365/2551/81611/7515/4087/3183/11052/1869/9555/5925/57805/6886/9839/8357/23028/57492/27316/375757/8202/6874/55198/1499/3005/79892/8726/3020/1108/10847/5977/8896/3146/8861/125476/25855/9314/10902/119392/10445/2186/8914/51755/6929/79809	56
GOTERM_CC	GO:0005884	actin filament	20/2029	99/19659	0.00246809	0.0146301	2316/87/71/2017/2039/301/2534/7170/11344/7171/395/7456/9948/23607/10787/6714/10603/5358/6525/7525	20
GOTERM_CC	GO:0030666	endocytic vesicle membrane	29/2029	163/19659	0.00247933	0.0146301	928/1173/3123/972/7311/6892/5289/8301/3122/3118/11031/10981/6845/2060/948/10890/1213/1785/3117/51762/3119/3920/163/8773/3133/7879/9779/817/3134	29
GOTERM_CC	GO:0005905	clathrin-coated pit	15/2029	66/19659	0.00253033	0.0148087	2017/1173/351/1211/1601/8301/2060/1213/1785/163/22876/8905/9779/10059/23048	15
GOTERM_CC	GO:0034518	RNA cap binding complex	6/2029	15/19659	0.00263586	0.0152516	27257/4686/8731/27161/1977/392517	6
GOTERM_CC	GO:0005791	rough endoplasmic reticulum	18/2029	86/19659	0.00264873	0.0152516	6235/2752/6155/6141/351/10134/6228/6748/23471/121665/7095/23204/54901/51552/6622/821/51430/7317	18
GOTERM_CC	GO:0099568	cytoplasmic region	69/2029	479/19659	0.00273606	0.0155387	2316/2017/1072/81631/2039/4354/83658/8655/51411/120/1211/56288/387/998/80762/6647/2319/10539/5573/5289/26258/2934/1487/55752/22832/22920/5874/7171/829/51164/10890/23157/5413/7456/9948/389/1176/231/6416/10801/58480/23122/9743/6710/81565/63915/1499/10097/22836/28988/11336/5962/5594/989/6622/89891/55770/821/23557/8874/7127/23048/5747/10947/3192/5590/51057/55188/3927	69
GOTERM_CC	GO:0030684	preribosome	16/2029	73/19659	0.00274212	0.0155387	6201/2091/55272/51096/10412/4809/55127/55813/55781/117246/134430/9790/10885/10813/84916/705	16
GOTERM_CC	GO:1902911	protein kinase complex	21/2029	107/19659	0.00282119	0.015631	1032/896/5573/219771/1025/4217/5925/5257/55255/891/8517/51719/4331/22938/5565/1017/9779/51755/902/54619/9175	21
GOTERM_CC	GO:0030132	clathrin coat of coated pit	7/2029	20/19659	0.00284597	0.015631	1173/1211/8301/2060/1213/163/9779	7
GOTERM_CC	GO:0099091	postsynaptic specialization, intracellular component	7/2029	20/19659	0.00284597	0.015631	2534/1785/9181/1499/6714/80758/7525	7
GOTERM_CC	GO:0101031	chaperone complex	7/2029	20/19659	0.00284597	0.015631	22948/3312/10574/10694/5536/10963/11140	7
GOTERM_CC	GO:0005802	trans-Golgi network	37/2029	225/19659	0.00293813	0.0160139	3123/8766/351/5872/1211/972/55297/3122/3118/163882/11031/10981/6845/10890/51542/27032/1213/738/5045/51552/162/221079/1785/3117/23122/4074/3119/22836/374868/55016/10396/10053/8905/636/91949/57511/10079	37
GOTERM_CC	GO:1902554	serine/threonine protein kinase complex	18/2029	87/19659	0.00302425	0.0161234	1032/896/219771/1025/5925/5257/55255/891/8517/51719/4331/22938/1017/9779/51755/902/54619/9175	18
GOTERM_CC	GO:0005741	mitochondrial outer membrane	31/2029	180/19659	0.00302596	0.0161234	3098/598/1374/5037/706/1727/51024/7311/7419/100188893/665/10981/116151/23111/9927/7417/8303/401505/4129/599/664/493856/841/22877/6622/54470/10059/55847/8564/54332/79691	31
GOTERM_CC	GO:0008021	synaptic vesicle	31/2029	180/19659	0.00302596	0.0161234	85439/598/1211/5867/1182/5037/801/30061/5874/6845/10890/23157/5413/7417/79772/127262/6856/10490/81565/51762/274/10987/5869/134957/6622/23557/8417/10059/26503/1759/6571	31
GOTERM_CC	GO:0031094	platelet dense tubular network	5/2029	11/19659	0.00315627	0.0166932	489/2039/2149/3708/5104	5
GOTERM_CC	GO:0045121	membrane raft	47/2029	304/19659	0.00318379	0.0167149	3688/3098/10666/203068/3945/11315/55004/2040/23603/351/64805/120/2534/7846/5023/2149/1445/2319/5573/5577/5230/948/3162/200576/8436/11252/27040/5045/973/5912/682/858/1499/3920/6714/26509/5594/1947/118/5519/10542/841/10855/5595/6532/7851/5590	47
GOTERM_CC	GO:0098857	membrane microdomain	47/2029	305/19659	0.00339656	0.0176084	3688/3098/10666/203068/3945/11315/55004/2040/23603/351/64805/120/2534/7846/5023/2149/1445/2319/5573/5577/5230/948/3162/200576/8436/11252/27040/5045/973/5912/682/858/1499/3920/6714/26509/5594/1947/118/5519/10542/841/10855/5595/6532/7851/5590	47
GOTERM_CC	GO:0030658	transport vesicle membrane	34/2029	204/19659	0.0034033	0.0176084	3123/598/1211/5867/972/1182/4900/3122/94121/801/3118/5874/6845/10959/3708/1213/203547/79772/127262/6856/51128/3117/10490/3119/3133/5869/6622/10484/23557/10059/3134/26503/10427/6571	34
GOTERM_CC	GO:0034708	methyltransferase complex	22/2029	116/19659	0.0035312	0.0181387	4149/2079/25962/23269/3276/80335/6874/56339/8726/11108/79872/23091/8731/10419/5252/125476/10445/26036/4297/2186/55006/57721	22
GOTERM_CC	GO:0012507	ER to Golgi transport vesicle membrane	14/2029	62/19659	0.00369572	0.0188481	3123/972/3122/3118/10959/203547/51128/3117/10490/3119/3133/10484/3134/10427	14
GOTERM_CC	GO:0005852	eukaryotic translation initiation factor 3 complex	6/2029	16/19659	0.00385237	0.0193562	8665/51386/8663/8669/10987/27335	6
GOTERM_CC	GO:0030014	CCR4-NOT complex	6/2029	16/19659	0.00385237	0.0193562	10140/219988/9337/25904/29883/4848	6
GOTERM_CC	GO:0042827	platelet dense granule	7/2029	21/19659	0.0038931	0.0193562	6403/10257/967/1521/5874/3708/3920	7
GOTERM_CC	GO:0044448	cell cortex part	29/2029	168/19659	0.00390377	0.0193562	2316/2017/1072/2039/4354/1211/2319/2934/1487/55752/7171/829/10890/23157/5413/7456/9948/10801/23122/6710/1499/10097/11336/5962/989/55770/7127/5590/3927	29
GOTERM_CC	GO:0005913	cell-cell adherens junction	21/2029	110/19659	0.00397319	0.0195645	87/7414/1982/11315/301/56288/2319/9124/117178/10890/9260/1499/8773/29766/5962/118/5021/3801/1266/8502/10397	21
GOTERM_CC	GO:0099572	postsynaptic specialization	51/2029	340/19659	0.00410947	0.020097	6207/6156/6222/26052/2039/6009/6136/6169/6132/120/6188/2534/140735/4900/6175/55327/55752/3312/9349/8440/9045/3708/51104/27020/9829/3836/6208/10006/1785/9743/25978/9181/1499/10097/6714/4905/28988/664/53335/5594/118/80758/5062/1266/9419/8502/1759/7525/26037/3752/5590	51
GOTERM_CC	GO:0030120	vesicle coat	13/2029	57/19659	0.00462133	0.0224465	1173/1211/8301/1315/2060/23423/1213/9276/51128/163/10484/9779/10427	13
GOTERM_CC	GO:0005758	mitochondrial intermembrane space	16/2029	77/19659	0.00479589	0.0231369	11315/6647/4713/10367/153768/51012/26235/4702/4719/57019/6622/27429/84269/2268/26517/57001	16
GOTERM_CC	GO:0017101	aminoacyl-tRNA synthetase multienzyme complex	5/2029	12/19659	0.00495412	0.0237399	5917/5859/3376/9521/7965	5
GOTERM_CC	GO:0032587	ruffle membrane	18/2029	91/19659	0.00499651	0.0237834	3688/1072/3690/6188/387/221472/5795/11252/1785/23122/9181/6714/5341/114609/8394/2268/7094/59338	18
GOTERM_CC	GO:0005771	multivesicular body	11/2029	45/19659	0.00509363	0.0239267	8766/972/967/5874/27243/51652/7251/973/25978/5873/55353	11
GOTERM_CC	GO:1990391	DNA repair complex	11/2029	45/19659	0.00509363	0.0239267	1069/286257/7515/5887/472/23028/5395/7486/5591/91419/4437	11
GOTERM_CC	GO:0000775	chromosome, centromeric region	32/2029	194/19659	0.00515303	0.0240475	8655/55320/348235/23279/51164/9555/23157/54820/5516/5885/10540/23244/23122/891/9918/81565/1616/27309/3297/1786/55746/25936/7514/7175/3070/989/151246/8243/8658/9735/3192/57082	32
GOTERM_CC	GO:0014069	postsynaptic density	47/2029	316/19659	0.00666758	0.0309133	6207/6156/6222/26052/2039/6009/6136/6169/6132/120/6188/2534/140735/4900/6175/55327/9349/8440/9045/3708/51104/27020/9829/3836/6208/10006/1785/9743/25978/9181/1499/10097/6714/4905/28988/664/53335/5594/118/80758/5062/1266/9419/8502/1759/26037/5590	47
GOTERM_CC	GO:0001891	phagocytic cup	7/2029	23/19659	0.00683013	0.0314626	51411/301/56990/27131/375033/1785/9938	7
GOTERM_CC	GO:0031248	protein acetyltransferase complex	18/2029	94/19659	0.00708241	0.0315091	60/10933/55274/23338/6874/6873/23326/55167/10943/56655/5977/6883/60560/79612/10902/10445/26122/55578	18
GOTERM_CC	GO:1902493	acetyltransferase complex	18/2029	94/19659	0.00708241	0.0315091	60/10933/55274/23338/6874/6873/23326/55167/10943/56655/5977/6883/60560/79612/10902/10445/26122/55578	18
GOTERM_CC	GO:0000313	organellar ribosome	17/2029	87/19659	0.00709774	0.0315091	51258/51263/11222/55173/23107/60488/64965/7818/10884/6182/4706/64981/28973/84311/51264/51073/124995	17
GOTERM_CC	GO:0005761	mitochondrial ribosome	17/2029	87/19659	0.00709774	0.0315091	51258/51263/11222/55173/23107/60488/64965/7818/10884/6182/4706/64981/28973/84311/51264/51073/124995	17
GOTERM_CC	GO:0042581	specific granule	27/2029	160/19659	0.00711309	0.0315091	7414/57153/10857/55004/2040/3934/6515/6813/326624/54918/1182/5023/961/196527/64114/948/5795/4790/3837/5912/54472/5873/8773/1265/10855/10396/932	27
GOTERM_CC	GO:0019867	outer membrane	33/2029	206/19659	0.00712911	0.0315091	3098/598/1374/5037/706/1727/51024/7311/7419/100188893/665/10981/116151/23111/9927/7417/8303/10128/401505/4129/599/664/493856/841/22877/6622/54470/56172/10059/55847/8564/54332/79691	33
GOTERM_CC	GO:0098793	presynapse	67/2029	482/19659	0.00714913	0.0315091	85439/6001/71/26052/11315/2752/60/351/3611/598/1211/5867/1182/5037/708/5023/2319/8301/801/55327/26258/30061/1487/3312/5874/6845/10890/23157/5413/115207/7417/27020/79772/9829/127262/8775/51560/6856/1785/10490/223082/84932/81565/10236/1499/51762/274/8773/11336/3064/10987/5533/5869/4983/134957/6622/821/94056/6532/23557/8417/10059/26503/1759/2805/6571/7533	67
GOTERM_CC	GO:0005845	mRNA cap binding complex	5/2029	13/19659	0.00737307	0.0322611	27257/4686/8731/27161/1977	5
GOTERM_CC	GO:0018995	host	8/2029	29/19659	0.00750048	0.0322611	7311/3836/3837/7153/29883/5196/7514/636	8
GOTERM_CC	GO:0030686	90S preribosome	8/2029	29/19659	0.00750048	0.0322611	55272/51096/55127/55813/134430/9790/10885/84916	8
GOTERM_CC	GO:0043657	host cell	8/2029	29/19659	0.00750048	0.0322611	7311/3836/3837/7153/29883/5196/7514/636	8
GOTERM_CC	GO:0044215	other organism	9/2029	35/19659	0.00767927	0.0324438	7311/3836/3837/7153/29883/5196/7514/636/735	9
GOTERM_CC	GO:0044216	other organism cell	9/2029	35/19659	0.00767927	0.0324438	7311/3836/3837/7153/29883/5196/7514/636/735	9
GOTERM_CC	GO:0044217	other organism part	9/2029	35/19659	0.00767927	0.0324438	7311/3836/3837/7153/29883/5196/7514/636/735	9
GOTERM_CC	GO:0032154	cleavage furrow	12/2029	54/19659	0.00791959	0.0332623	3688/8766/4638/387/23157/54820/389/5962/989/5898/3384/54434	12
GOTERM_CC	GO:0005643	nuclear pore	17/2029	88/19659	0.00797282	0.03329	23299/23039/23279/3836/3837/5903/9818/55746/7175/23633/727851/8658/55161/129401/11269/55706/729540	17
GOTERM_CC	GO:0032279	asymmetric synapse	47/2029	320/19659	0.00838396	0.0348032	6207/6156/6222/26052/2039/6009/6136/6169/6132/120/6188/2534/140735/4900/6175/55327/9349/8440/9045/3708/51104/27020/9829/3836/6208/10006/1785/9743/25978/9181/1499/10097/6714/4905/28988/664/53335/5594/118/80758/5062/1266/9419/8502/1759/26037/5590	47
GOTERM_CC	GO:0008287	protein serine/threonine phosphatase complex	11/2029	48/19659	0.00850943	0.034918	5534/5500/3708/5532/5516/29966/80335/151987/5533/5519/28227	11
GOTERM_CC	GO:1903293	phosphatase complex	11/2029	48/19659	0.00850943	0.034918	5534/5500/3708/5532/5516/29966/80335/151987/5533/5519/28227	11
GOTERM_CC	GO:0070820	tertiary granule	27/2029	164/19659	0.00984252	0.0401575	2495/51646/55004/8655/2040/387/258010/6515/6813/427/4893/4048/1315/961/196527/5269/5473/51552/5912/3920/28988/5236/51125/8773/1265/8417/374395	27
GOTERM_CC	GO:0030118	clathrin coat	11/2029	49/19659	0.00997392	0.0404624	1173/1211/8301/132320/2060/1213/162/163/10053/9779/10947	11
GOTERM_CC	GO:0098562	cytoplasmic side of membrane	28/2029	172/19659	0.0100925	0.0407123	6235/2782/6155/26119/2280/387/2534/2781/121665/2760/2539/640/3301/27131/2791/6710/858/6714/2776/1269/286/63892/27429/94056/2268/8502/7525/10672	28
GOTERM_CC	GO:0005940	septin ring	5/2029	14/19659	0.0105071	0.0412203	55752/23157/5413/10801/989	5
GOTERM_CC	GO:0031105	septin complex	5/2029	14/19659	0.0105071	0.0412203	55752/23157/5413/10801/989	5
GOTERM_CC	GO:0032160	septin filament array	5/2029	14/19659	0.0105071	0.0412203	55752/23157/5413/10801/989	5
GOTERM_CC	GO:0036020	endolysosome membrane	5/2029	14/19659	0.0105071	0.0412203	1173/1211/1213/163/23274	5
GOTERM_CC	GO:0098554	cytoplasmic side of endoplasmic reticulum membrane	5/2029	14/19659	0.0105071	0.0412203	6235/6155/121665/3301/63892	5
GOTERM_CC	GO:0000152	nuclear ubiquitin ligase complex	10/2029	43/19659	0.0106751	0.0416504	84333/580/648/51433/25847/996/80012/8697/8881/11065	10
GOTERM_CC	GO:0031968	organelle outer membrane	32/2029	204/19659	0.0107637	0.0417679	3098/598/1374/5037/706/1727/51024/7311/7419/100188893/665/10981/116151/23111/9927/7417/8303/10128/401505/4129/599/664/493856/841/22877/6622/54470/10059/55847/8564/54332/79691	32
GOTERM_CC	GO:0035579	specific granule membrane	17/2029	91/19659	0.0111274	0.0429456	57153/10857/55004/2040/6515/326624/54918/5023/961/196527/64114/948/5795/5912/8773/10396/932	17
GOTERM_CC	GO:0000123	histone acetyltransferase complex	16/2029	84/19659	0.0112796	0.0432991	60/10933/55274/23338/6874/6873/23326/55167/10943/56655/5977/6883/10902/10445/26122/55578	16
GOTERM_CC	GO:0030131	clathrin adaptor complex	8/2029	31/19659	0.0114514	0.0437235	1173/8301/2060/162/163/10053/9779/10947	8
GOTERM_CC	GO:0005798	Golgi-associated vesicle	28/2029	175/19659	0.0126371	0.0479942	3123/351/1211/972/4900/1315/3122/121665/3118/5874/10959/23423/1213/203547/9276/5045/51128/51552/3117/10490/51762/3119/3133/10484/9445/3134/10427/2157	28
GOTERM_CC	GO:0005868	cytoplasmic dynein complex	6/2029	20/19659	0.0130113	0.0483859	83658/8655/140735/7175/89891/55112	6
GOTERM_CC	GO:0031082	BLOC complex	6/2029	20/19659	0.0130113	0.0483859	26258/63915/79036/84343/23557/3257	6
GOTERM_CC	GO:0032806	carboxy-terminal domain protein kinase complex	6/2029	20/19659	0.0130113	0.0483859	1025/5925/4331/22938/51755/902	6
GOTERM_CC	GO:0036019	endolysosome	6/2029	20/19659	0.0130113	0.0483859	1173/1211/1213/5641/163/23274	6
KEGG_PATHWAY	hsa03010	Ribosome	45/998	153/7839	2.81156e-08	3.52434e-06	6207/6156/6122/6135/6222/6235/6203/6136/6189/6155/6164/6152/6169/6141/6165/6132/6188/6209/6218/6224/6228/6161/6147/6154/7311/6201/51263/11222/6175/51065/6146/6205/55173/9349/9045/6208/64965/6182/6125/64981/6134/51264/51073/124995/6159	45
KEGG_PATHWAY	hsa03013	RNA transport	35/998	165/7839	0.00141546	0.0188317	10289/1982/11171/80145/10209/8665/1968/26986/8672/1979/23279/1983/1974/8663/9669/8669/6613/9939/3837/57187/5903/26019/9818/55746/7514/7175/4686/10419/1977/129401/1967/6607/55706/8761/25929	35
KEGG_PATHWAY	hsa03015	mRNA surveillance pathway	21/998	91/7839	0.00437096	0.0371531	26986/5500/11052/5516/11051/9939/80335/26019/8732/53981/5519/4686/8731/64895/10914/28227/9887/8106/8761/10978/53918	21
KEGG_PATHWAY	hsa03018	RNA degradation	22/998	79/7839	0.000241052	0.00670563	51691/10140/51013/26986/84186/219988/9337/25904/3313/9652/27258/22803/2026/27257/29883/80349/170506/80153/4848/115752/694/8761	22
KEGG_PATHWAY	hsa04066	HIF-1 signaling pathway	23/998	100/7839	0.00307036	0.0302005	2597/3098/1950/112398/5578/7076/5230/3459/3162/10000/4790/5291/2026/5054/8569/5604/5594/405/5595/1977/112399/817/5163	23
KEGG_PATHWAY	hsa04072	Phospholipase D signaling pathway	31/998	148/7839	0.00316836	0.0302005	26052/6009/10554/5154/387/2534/5321/2149/4893/1950/6850/56034/2885/5578/22800/10000/552/1608/1785/5291/5604/5594/8394/5595/5898/8526/8527/1759/8877/10672/2147	31
KEGG_PATHWAY	hsa04110	Cell cycle	29/998	124/7839	0.000714286	0.0132242	7534/1032/896/7529/8555/10971/5933/4087/51433/4175/1869/5925/5885/1647/4172/472/25847/996/891/8697/8881/5000/1017/8243/5591/8556/9232/902/7533	29
KEGG_PATHWAY	hsa04114	Oocyte meiosis	28/998	125/7839	0.00176567	0.0216118	7534/805/5534/7529/10971/801/5500/51433/3708/5532/387778/5516/25847/996/891/8697/8881/5604/5594/5533/5519/6197/5595/1017/8243/817/9232/7533	28
KEGG_PATHWAY	hsa04137	Mitophagy - animal	17/998	65/7839	0.0025138	0.0265249	11345/598/51024/4893/665/8887/1869/4077/9927/64786/22800/10241/6714/664/9451/7879/79735	17
KEGG_PATHWAY	hsa04142	Lysosome	26/998	123/7839	0.00578032	0.0453533	5660/5476/968/1211/427/3988/2760/967/10577/1200/1521/2717/1213/1176/162/4074/5641/3920/55353/285362/10053/8905/26503/1519/2720/10947	26
KEGG_PATHWAY	hsa04144	Endocytosis	57/998	244/7839	2.49716e-06	0.000127355	26052/1173/80230/26119/8766/1211/56288/387/5867/998/7852/10109/10093/1601/30845/6642/377/8853/6643/381/51160/11059/11031/3312/4087/3561/2060/27243/27131/23111/829/10890/51652/84313/7456/7251/23527/1213/9829/10092/1785/25978/51510/858/10095/6714/163/274/51019/29934/3133/8394/7879/5869/3134/1759/5590	57
KEGG_PATHWAY	hsa04145	Phagosome	36/998	152/7839	0.000131079	0.004011	7277/3688/71/203068/3690/10383/60/3123/51807/9550/9296/7057/7846/529/3108/5289/3122/84617/3118/948/84790/200576/2214/81027/3117/4074/3109/3119/3920/3133/7879/5869/821/8417/3134/1311	36
KEGG_PATHWAY	hsa04218	Cellular senescence	38/998	160/7839	8.07684e-05	0.00308939	805/896/6009/823/5534/4893/9261/5606/801/5933/7419/2113/5500/4087/3708/1869/5532/7417/5925/1647/22800/472/10000/4790/2308/5291/891/5054/5604/3133/5594/5533/5595/1017/3134/91750/677/5810	38
KEGG_PATHWAY	hsa04370	VEGF signaling pathway	17/998	59/7839	0.000782973	0.0132242	5534/998/5321/4893/9261/5578/5532/7867/10000/5291/6714/5604/5594/5533/5595/8877/5747	17
KEGG_PATHWAY	hsa04510	Focal adhesion	40/998	199/7839	0.00197056	0.0231919	2316/29780/87/3688/71/7414/896/3690/5154/60/3674/3611/4638/387/5908/998/2534/7057/1950/10398/56034/2885/5500/5578/10000/5291/858/1499/6714/7424/64098/7450/5604/5594/5062/5595/7094/5747/3676/1311	40
KEGG_PATHWAY	hsa04520	Adherens junction	18/998	72/7839	0.00325692	0.0302005	87/71/7414/60/56288/387/998/2534/117178/4087/51701/10810/5795/1499/6714/5594/5595/7525	18
KEGG_PATHWAY	hsa04530	Tight junction	35/998	170/7839	0.00241824	0.0264279	7277/87/3688/71/2017/4478/4637/8531/60/5872/56288/387/83700/51807/57180/998/7846/10398/4217/50848/84790/5516/10096/51735/9181/10097/51762/6714/5962/5519/911/912/5565/3308/5590	35
KEGG_PATHWAY	hsa04540	Gap junction	22/998	88/7839	0.00120684	0.016786	7277/203068/5154/10383/51807/7846/4893/1950/84617/56034/2885/5578/3708/84790/5607/81027/6714/2776/5604/5592/5594/5595	22
KEGG_PATHWAY	hsa04610	Complement and coagulation cascades	19/998	79/7839	0.0040477	0.0353885	1191/2162/5627/2149/5054/7450/1380/2155/2147/735/714/3053/712/731/2159/713/5104/5624/2157	19
KEGG_PATHWAY	hsa04611	Platelet activation	38/998	124/7839	1.03743e-07	7.93634e-06	3688/71/5742/3690/60/64805/3674/4638/387/5908/2534/2815/2814/5023/5321/2149/23365/6915/6850/83706/2811/5500/51206/3708/10000/5291/10125/6714/2776/8773/7450/5592/5594/5595/7094/5590/10672/2147	38
KEGG_PATHWAY	hsa04625	C-type lectin receptor signaling pathway	23/998	104/7839	0.00515613	0.0415204	805/51266/387/5534/834/4893/23365/9261/801/6850/3708/5532/22800/10000/4790/5291/8517/10892/6714/5594/5533/841/5595	23
KEGG_PATHWAY	hsa04640	Hematopoietic cell lineage	24/998	97/7839	0.000864329	0.0132242	928/3690/3123/3674/3108/2815/2814/3122/3118/2811/948/951/914/3117/931/3109/3119/917/2057/952/911/912/1380/3676	24
KEGG_PATHWAY	hsa04658	Th1 and Th2 cell differentiation	21/998	92/7839	0.00500328	0.0413785	3123/5534/3108/3122/3118/3561/5532/3459/27040/6775/4790/3117/8517/3109/4853/3119/917/5594/5533/5595/4854	21
KEGG_PATHWAY	hsa04660	T cell receptor signaling pathway	25/998	101/7839	0.000675997	0.0132242	9402/387/5534/998/2534/4893/2885/8440/5532/1326/27040/10000/4790/5291/8517/10892/10125/917/5604/5594/5533/5062/5595/959/7006	25
KEGG_PATHWAY	hsa04662	B cell receptor signaling pathway	19/998	71/7839	0.00106911	0.0155785	27071/5534/4893/974/6850/2885/5532/10000/4790/973/5291/8517/10892/5604/5594/5533/5595/971/1380	19
KEGG_PATHWAY	hsa04666	Fc gamma R-mediated phagocytosis	23/998	91/7839	0.000801646	0.0132242	1072/998/10109/5321/10093/8853/6850/2934/5578/10810/10092/27040/2214/10000/1785/5291/10095/274/5604/5594/8394/5595/8877	23
KEGG_PATHWAY	hsa04722	Neurotrophin signaling pathway	27/998	119/7839	0.00173544	0.0216118	805/397/27018/387/5908/998/4893/9261/11213/801/4217/2885/5607/10000/4790/5291/57498/11108/51135/5604/8767/5594/6197/5595/10603/10019/817	27
KEGG_PATHWAY	hsa04810	Regulation of actin cytoskeleton	47/998	214/7839	9.83901e-05	0.00334526	87/3688/71/1072/4478/7414/3690/5154/60/3674/5305/4638/387/998/7852/10109/2149/10093/4893/23365/1950/10398/56034/2934/5500/200576/10092/22800/5291/10095/10787/6714/5604/9459/5962/7114/5594/8394/5062/5595/8874/54434/5747/3676/54961/10672/2147	47
KEGG_PATHWAY	hsa05010	Alzheimer disease	38/998	171/7839	0.000348321	0.00819895	805/2597/489/7388/823/351/4698/5534/10313/801/4713/7381/3028/3708/4714/5532/4724/54539/4718/9167/4696/4706/4702/2776/6391/4711/9451/5594/5533/4719/841/6622/5595/4720/83464/4704/55851/440567	38
KEGG_PATHWAY	hsa05016	Huntington disease	38/998	193/7839	0.00366511	0.032986	6648/1173/7388/4698/1211/6647/2876/7419/4713/7019/7381/3708/4714/51164/4724/5440/7417/1213/10540/54539/5434/4718/9167/4696/6874/4706/4702/2776/163/9519/6391/4711/3064/4719/841/4720/4704/440567	38
KEGG_PATHWAY	hsa05020	Prion diseases	12/998	35/7839	0.00085297	0.0132242	2534/6647/6352/5604/5594/10963/5595/735/714/712/731/713	12
KEGG_PATHWAY	hsa05100	Bacterial invasion of epithelial cells	28/998	74/7839	3.45524e-08	3.52434e-06	3688/71/2017/26052/7414/60/3611/1211/387/998/10109/10093/79658/55752/23157/1213/10092/23607/10801/1785/5291/858/10095/1499/6714/9844/1759/5747	28
KEGG_PATHWAY	hsa05130	Pathogenic Escherichia coli infection	25/998	55/7839	2.17343e-09	6.6507e-07	7277/3688/7534/71/2017/203068/10383/60/387/51807/998/2534/7846/10109/10093/10971/84617/5578/8440/84790/10092/81027/10095/9181/1499	25
KEGG_PATHWAY	hsa05131	Shigellosis	19/998	65/7839	0.000320493	0.00817258	3688/71/2017/7414/60/998/10109/10093/7307/10092/4790/8517/10095/102724594/6714/8767/5594/9844/5595	19
KEGG_PATHWAY	hsa05152	Tuberculosis	36/998	179/7839	0.00320013	0.0302005	805/3123/387/5534/972/3108/23365/5289/3122/801/6850/3118/5532/4800/3459/3313/2214/10000/4790/3117/10892/3109/3119/3920/6714/51135/8767/114609/5594/5533/7879/841/5869/5595/817/8877	36
KEGG_PATHWAY	hsa05166	Human T-cell leukemia virus 1 infection	45/998	219/7839	0.000655591	0.0132242	896/3123/598/5534/3108/706/4893/3122/7419/3118/2113/4087/3561/51433/1869/5532/7417/5925/472/6416/10000/996/4790/3117/5291/8517/3109/3119/8697/9519/917/8881/5604/7514/3133/5594/5533/200186/5595/821/1017/7094/3134/9232/6929	45
KEGG_PATHWAY	hsa05203	Viral carcinogenesis	50/998	201/7839	1.51963e-06	9.30011e-05	87/7534/896/85236/8366/8970/8339/5315/8340/8367/387/998/7529/8363/6672/4893/9261/10971/3018/5933/7419/6850/7337/2958/2934/8349/8365/2885/8343/5925/2957/5922/4790/5291/8517/3572/6714/9519/28973/2960/3133/5594/1108/841/22938/5966/5595/1017/3134/7533	50
KEGG_PATHWAY	hsa05322	Systemic lupus erythematosus	35/998	133/7839	1.54909e-05	0.000677175	87/85236/8366/8970/3123/8334/8339/8340/8367/3013/8969/3108/3015/8363/3122/3018/8338/3118/8349/8365/6738/8343/9555/8357/2214/3117/3109/3119/3020/959/735/714/712/731/713	35
KEGG_PATHWAY	hsa05416	Viral myocarditis	16/998	59/7839	0.00222908	0.0252629	71/1982/60/3123/2534/3108/3122/3118/8672/3117/3109/3119/3133/841/959/3134	16
