# Supplementary material for: An Integrated Transcriptomic and Proteomic Analysis Identifies Significant Novel Pathways for Henoch-Schönlein Purpura Nephritis Progression
Source: Biomed Res Int. 2020 Jun 19;2020:2489175. doi: 10.1155/2020/2489175 (PMC7322592; doi:10.1155/2020/2489175)
Supplement: Supplementary Materials — .Supplementary Figure S1: images of renal pathological sections of HSPN patients. (A) Type 1. (B) Type 2. (C) Type 3. Supplementary Figure S2: PCA score plots for discriminating samples within the different groups. Supplementary Figure S3: correlation analysis of differentially expressed mRNAs and proteins between different types of HSPN. Supplementary Table S1: list of quantitated 24,493 mRNAs and 592 proteins. Supplementary Table S2: list of differentially expressed mRNAs between different HSPN types. Supplementary Table S3: list of differentially expressed proteins between different HSPN types. Supplementary Table S4: list of DEGs which were differentially expressed between HSPN type 1 and HSPN type 2 and HSPN type 2 and HSPN type 3. Supplementary Table S5: the significant pathways enriched by DEGs between different HSPN types. Supplementary Table S6: the correlation coefficients between differentially expressed genes in four pathways and clinical biochemical indicators. Supplementary Table S7: list of mRNAs and proteins selected for validation. Supplementary Table S8: the significant pathways enriched by downregulated DEGs between HSP and HSPN. Supplementary Table S9: list of differentially expressed mRNAs between HSP and HSPN. Supplementary Table S10: the differentially expressed genes in four pathways negative regulation of the JAK-STAT cascade and so on. [file 2489175.f1.zip › Supplementary Table S9.xlsx]

## Sheet: Sheet1
Supplementary Table S9 List of differentially expressed mRNAs between HSP and HSPN
Trans_Name	Gene name	Track_id	Locus	Strand	Fold change	p_value
CXCL8-201	CXCL8	ENST00000307407.7_1	chr4:74606223-74609433	+	10.8644	0.00505321
CSDE1-218	CSDE1	ENST00000610726.4_1	chr1:115259535-115300671	-	10.7304	0.00411408
RPL27A-208	RPL27A	ENST00000530913.1_1	chr11:8705806-8707395	+	7.24652	0.00466444
LSP1-204	LSP1	ENST00000406638.6_1	chr11:1891474-1913493	+	6.30401	0.0277577
SRSF2-203	SRSF2	ENST00000392485.2_1	chr17:74730197-74733415	-	5.96283	0.00107242
DNM2-202	DNM2	ENST00000359692.10_3	chr19:10828769-10942560	+	5.71701	0.00692771
MMP9-201	MMP9	ENST00000372330.3_1	chr20:44637547-44645200	+	5.42712	0.00417709
CXCL1-201	CXCL1	ENST00000395761.3_1	chr4:74735121-74736959	+	5.41209	0.00230247
ISG15-203	ISG15	ENST00000624697.3_3	chr1:936518-949921	+	5.32598	0.0233314
NFYC-203	NFYC	ENST00000372652.5_2	chr1:41175029-41237275	+	5.31509	0.0127689
AC233724.20-201	AC233724.20	ENST00000638842.1_1	chr5:17597341-17597937	-	5.14826	0.0180803
BCL7C-202	BCL7C	ENST00000380317.8_1	chr16:30844947-30905623	-	4.67919	0.0163036
TDO2-208	TDO2	ENST00000536354.2_1	chr4:156824847-156841558	+	4.42872	0.037705
STRN4-202	STRN4	ENST00000391910.7_1	chr19:47222768-47250138	-	4.29608	0.00252096
CLIC1-207	CLIC1	ENST00000375780.6_1	chr6:31698358-31705095	-	4.24866	0.0433762
MAPKAPK2-201	MAPKAPK2	ENST00000294981.8_1	chr1:206858289-206906208	+	4.12454	0.0366727
MMP3-201	MMP3	ENST00000299855.9_1	chr11:102706532-102714534	-	4.11602	0.00179001
HK1-203	HK1	ENST00000360289.6_1	chr10:71029756-71161635	+	3.89575	0.0424014
MMP8-201	MMP8	ENST00000236826.7_1	chr11:102582526-102595685	-	3.86219	0.0271999
CDC42SE1-202	CDC42SE1	ENST00000439374.6_1	chr1:151023447-151042801	-	3.80488	0.0136001
ANPEP-201	ANPEP	ENST00000300060.6_1	chr15:90328120-90358094	-	3.69212	0.0360884
SLC16A3-211	SLC16A3	ENST00000581287.5_1	chr17:80191563-80197962	+	3.63847	0.000929154
TKT-208	TKT	ENST00000462138.5_1	chr3:53258723-53290047	-	3.60936	0.0310276
PLEKHG3-201	PLEKHG3	ENST00000247226.12_1	chr14:65171315-65216965	+	3.5994	0.00556291
C9orf172-201	C9orf172	ENST00000436881.2_1	chr9:139738867-139743253	+	3.53003	0.0321129
RPS21-204	RPS21	ENST00000450116.6_1	chr20:60962374-60963575	+	3.49386	0.0464694
RNF213-215	RNF213	ENST00000573038.1_3	chr17:78346869-78348859	+	3.40901	0.0431056
C5AR1-201	C5AR1	ENST00000355085.3_1	chr19:47813131-47825323	+	3.37583	0.026662
MTRNR2L1-201	MTRNR2L1	ENST00000540040.2_1	chr17:22022437-22023989	+	3.36551	0.0319948
TSG101-204	TSG101	ENST00000536719.5_1	chr11:18489883-18548498	-	3.36034	0.000371946
IKZF3-217	IKZF3	ENST00000623724.3_1	chr17:37913974-38020441	-	3.34278	0.023853
RPS6KA4-202	RPS6KA4	ENST00000528057.5_2	chr11:64126620-64139687	+	3.33652	0.0389479
PXN-202	PXN	ENST00000267257.11_2	chr12:120648242-120703574	-	3.28141	0.0330236
INHBA-201	INHBA	ENST00000242208.4_1	chr7:41724712-41742706	-	3.19093	0.00424995
YPEL5-203	YPEL5	ENST00000379520.7_1	chr2:30369807-30383399	+	3.17975	0.0134064
SDC2-201	SDC2	ENST00000302190.8_1	chr8:97505579-97624008	+	3.15571	0.0163865
COX4I1-208	COX4I1	ENST00000564903.1_1	chr16:85834808-85840574	+	3.15431	0.0391458
PSD4-205	PSD4	ENST00000441564.7_1	chr2:113931574-113966973	+	3.13623	0.0147593
MAPKAPK3-205	MAPKAPK3	ENST00000457064.1_1	chr3:50654821-50677936	+	3.08273	0.0473443
VEGFA-205	VEGFA	ENST00000372067.7_1	chr6:43737950-43754224	+	3.06208	0.000886937
PTGS2-201	PTGS2	ENST00000367468.9_1	chr1:186640923-186649559	-	3.05886	0.00897415
STC1-201	STC1	ENST00000290271.6_1	chr8:23699428-23712320	-	2.97916	0.00181268
PRPF38B-201	PRPF38B	ENST00000370021.1_1	chr1:109234963-109244425	+	2.95912	0.0077806
SETD1A-201	SETD1A	ENST00000262519.13_2	chr16:30968615-30995985	+	2.94068	0.015881
CEBPB-201	CEBPB	ENST00000303004.4_1	chr20:48807271-48809226	+	2.93372	0.00971059
CXCL3-201	CXCL3	ENST00000296026.4_1	chr4:74902306-74904406	-	2.90792	0.0426905
TPD52L2-201	TPD52L2	ENST00000217121.9_1	chr20:62496647-62522898	+	2.87309	0.0471303
MMP1-201	MMP1	ENST00000315274.6_1	chr11:102660651-102668891	-	2.84855	0.0216102
TRAF3IP1-201	TRAF3IP1	ENST00000373327.4_1	chr2:239229082-239309541	+	2.84549	0.0388254
AC106774.9-201	AC106774.9	ENST00000638668.1_1	chr5:17518476-17519072	+	2.83074	0.0116688
LSP1-207	LSP1	ENST00000421485.5_1	chr11:1884476-1904658	+	2.79668	0.0300642
C1RL-201	C1RL	ENST00000266542.8_1	chr12:7247150-7261869	-	2.79607	0.0462437
GPX1-201	GPX1	ENST00000419349.1_1	chr3:49394611-49395716	-	2.79553	0.0218429
SON-202	SON	ENST00000356577.8_3	chr21:34914924-34949787	+	2.77311	0.0157196
DDOST-202	DDOST	ENST00000415136.6_2	chr1:20978260-20988037	-	2.71935	0.0422347
ITPRIP-201	ITPRIP	ENST00000278071.6_1	chr10:106069456-106093663	-	2.70088	0.00191851
MEF2C-209	MEF2C	ENST00000504921.6_2	chr5:88012934-88179281	-	2.68516	0.0493169
CTSB-202	CTSB	ENST00000353047.10_1	chr8:11700033-11725738	-	2.66192	0.00539269
ACTG1-210	ACTG1	ENST00000575842.5_1	chr17:79477015-79479807	-	2.6336	0.0222643
VPS26A-202	VPS26A	ENST00000373382.5_1	chr10:70883268-70932617	+	2.62908	0.0181124
THBD-201	THBD	ENST00000377103.2_1	chr20:23026270-23030378	-	2.58027	0.0135376
COL6A2-201	COL6A2	ENST00000300527.8_1	chr21:47518011-47552763	+	2.50221	0.0126655
PHLDA1-201	PHLDA1	ENST00000266671.9_1	chr12:76419227-76427712	-	2.4911	0.00137693
MGAT4B-202	MGAT4B	ENST00000337755.9_1	chr5:179224597-179229998	-	2.43047	0.0380118
TRAF3IP3-202	TRAF3IP3	ENST00000367024.5_2	chr1:209931843-209955652	+	2.42467	0.0421299
TOLLIP-207	TOLLIP	ENST00000527886.5_2	chr11:1295602-1324020	-	2.41914	0.0124405
MMP10-201	MMP10	ENST00000279441.8_1	chr11:102641234-102651359	-	2.41291	0.0219892
ABR-205	ABR	ENST00000544583.6_1	chr17:906767-1090616	-	2.38555	0.0293272
TFPI2-201	TFPI2	ENST00000222543.9_1	chr7:93514709-93520303	-	2.37633	0.0450805
NMT1-213	NMT1	ENST00000592782.5_1	chr17:43128978-43186384	+	2.36938	0.0155205
HS3ST3B1-201	HS3ST3B1	ENST00000360954.2_1	chr17:14204400-14252721	+	2.36002	2.21e-05
GTF3C1-201	GTF3C1	ENST00000356183.8_1	chr16:27471999-27561227	-	2.33481	0.0418314
PKIB-003	PKIB	ENST00000368446.1	chr6:123038707-123046426	+	2.32823	0.0258325
EPPK1-201	EPPK1	ENST00000568225.2_1	chr8:144939910-144947434	-	2.32528	0.0421933
C17orf80-207	C17orf80	ENST00000582391.1_3	chr17:71228868-71232161	+	2.30159	0.0305263
NECTIN3-206	NECTIN3	ENST00000485303.5_1	chr3:110790590-110854801	+	2.23996	0.0390513
SQLE-201	SQLE	ENST00000265896.9_1	chr8:126010748-126034525	+	2.21813	0.0243398
C12orf49-201	C12orf49	ENST00000261318.4_1	chr12:117147990-117175866	-	2.19688	0.0204012
C3-201	C3	ENST00000245907.10_1	chr19:6677715-6720693	-	2.18965	0.022463
PANX2-202	PANX2	ENST00000395842.2_1	chr22:50609160-50618723	+	2.17798	0.0133588
RPL13-201	RPL13	ENST00000311528.9_1	chr16:89627065-89633236	+	2.17687	0.0425281
IGFBP5-201	IGFBP5	ENST00000233813.4_1	chr2:217536828-217560248	-	2.17133	0.0468962
COL7A1-201	COL7A1	ENST00000328333.12_1	chr3:48601506-48632700	-	2.16651	0.00182075
CCL4L1-203	CCL4L1	ENST00000444414.1	chr17:34538310-34540048	+	2.08987	0.048158
GTF2IRD2-001	GTF2IRD2	ENST00000405086.2	chr7:74210483-74267847	-	2.08841	0.0499046
ALCAM-201	ALCAM	ENST00000306107.9_3	chr3:105085753-105295744	+	2.08609	0.0269017
LARP1-208	LARP1	ENST00000518892.1_1	chr5:154135563-154166244	+	2.07899	0.0413426
AC106774.7-201	AC106774.7	ENST00000638408.1_1	chr5:17521910-17522506	+	2.04559	0.0324631
P3H2-201	P3H2	ENST00000319332.9_1	chr3:189674517-189838718	-	2.03804	0.0162515
TM9SF4-201	TM9SF4	ENST00000217315.9_1	chr20:30697539-30755061	+	2.03747	0.00970564
PDLIM2-201	PDLIM2	ENST00000265810.8_1	chr8:22438003-22455538	+	2.03096	0.0420315
OR11G2-203	OR11G2	ENST00000641879.1_1	chr14:20659053-20669234	+	2.01866	0.0270266
FZD7-201	FZD7	ENST00000286201.2_1	chr2:202899310-202903168	+	1.97012	0.0113122
LACC1-203	LACC1	ENST00000441843.5_1	chr13:44453420-44468067	+	1.93998	0.0419619
FICD-204	FICD	ENST00000552695.5_1	chr12:108908962-108914987	+	1.91164	0.0345254
ARHGAP39-201	ARHGAP39	ENST00000276826.5_1	chr8:145754563-145831201	-	1.91026	0.0245388
ADPRHL1-204	ADPRHL1	ENST00000612156.2_2	chr13:114053925-114107839	-	1.88606	0.0458768
TCHH-202	TCHH	ENST00000614923.1_1	chr1:152078793-152087930	-	1.88303	0.026929
POTEI-201	POTEI	ENST00000451531.6_1	chr2:131217028-131267239	-	1.84395	0.0367712
PCDHA1-201	PCDHA1	ENST00000378133.4_4	chr5:140165721-140168446	+	1.82857	0.0443615
JPT2-201	JPT2	ENST00000248098.7_1	chr16:1728257-1752087	+	1.80304	0.0344043
NRG1-202	NRG1	ENST00000356819.7_1	chr8:32405785-32625477	+	1.75122	0.0163734
MGA-207	MGA	ENST00000566586.5_1	chr15:41961026-42065279	+	1.73293	0.0375108
ABCA2-201	ABCA2	ENST00000265662.9_1	chr9:139901686-139922740	-	1.7132	0.0347985
TCF7L1-201	TCF7L1	ENST00000282111.3_1	chr2:85360533-85537511	+	1.7041	0.0472383
PCDHB11-201	PCDHB11	ENST00000354757.4_2	chr5:140579155-140583352	+	1.69108	0.0297852
AGPAT3-205	AGPAT3	ENST00000398063.6_1	chr21:45344889-45406417	+	1.67215	0.0370519
SPRY2-201	SPRY2	ENST00000377102.5_1	chr13:80910111-80913794	-	1.67158	0.0239947
MRC2-201	MRC2	ENST00000303375.9_1	chr17:60704762-60770958	+	1.65309	0.0190401
SPRED2-201	SPRED2	ENST00000356388.8_1	chr2:65537985-65659311	-	1.63959	0.0478846
RASSF8-203	RASSF8	ENST00000405154.6_1	chr12:26111991-26225802	+	1.63733	0.0267758
BMP2-201	BMP2	ENST00000378827.4_1	chr20:6748311-6760927	+	1.60814	0.00752918
LDLRAD2-201	LDLRAD2	ENST00000344642.6_1	chr1:22138758-22151714	+	1.58992	0.0327918
ZNF555-201	ZNF555	ENST00000334241.8_1	chr19:2841433-2860482	+	1.58575	0.0373272
DIP2C-201	DIP2C	ENST00000280886.11_1	chr10:320138-735608	-	1.53815	0.0455302
QRFP-201	QRFP	ENST00000343079.1_1	chr9:133768815-133769225	-	1.52001	0.00953527
ABL2-204	ABL2	ENST00000502732.5_1	chr1:179068462-179198736	-	1.50542	0.0457626
COL2A1-202	COL2A1	ENST00000380518.7_2	chr12:48366748-48398269	-	1.50434	0.0438152
FTH1-207	FTH1	ENST00000532601.1_1	chr11:61732073-61734638	-	0.0311729	0.00283
KIF2A-202	KIF2A	ENST00000401507.7_1	chr5:61601989-61681503	+	0.0314899	0.00261473
FLNA-204	FLNA	ENST00000369856.7_1	chrX:153576897-153599590	-	0.0337839	0.00194642
TUBA4A-201	TUBA4A	ENST00000248437.8_1	chr2:220114433-220118754	-	0.0447616	0.000826841
STON2-202	STON2	ENST00000553821.1_1	chr14:81734392-81743277	-	0.045119	1.03e-05
RPS13-202	RPS13	ENST00000525634.5_1	chr11:17095936-17099334	-	0.050575	0.00234927
TAGLN2-202	TAGLN2	ENST00000368096.5_1	chr1:159887897-159893507	-	0.0520764	0.015147
PARVB-203	PARVB	ENST00000404989.1_1	chr22:44464941-44565064	+	0.0529571	0.00333069
MAX-205	MAX	ENST00000358664.8_1	chr14:65542262-65569188	-	0.053438	0.0155048
ACTN1-204	ACTN1	ENST00000438964.6_1	chr14:69341403-69445979	-	0.0534636	0.000556028
CDC42SE1-201	CDC42SE1	ENST00000357235.5_1	chr1:151023449-151032125	-	0.0536423	1.5e-05
CSDE1-202	CSDE1	ENST00000339438.10_1	chr1:115259534-115300604	-	0.0536566	0.00225935
C9orf16-201	C9orf16	ENST00000372994.1_1	chr9:130922539-130926207	+	0.0554087	0.000120898
DAPP1-203	DAPP1	ENST00000512369.1_1	chr4:100738003-100789871	+	0.0559776	0.00177891
SOD2-201	SOD2	ENST00000337404.8_1	chr6:160103197-160114310	-	0.0576485	0.0067512
USF2-212	USF2	ENST00000599625.1_1	chr19:35761904-35770150	+	0.0593034	2.68e-06
RPL30-201	RPL30	ENST00000287038.7_2	chr8:99053949-99057818	-	0.0594449	0.00228856
HBG2-201	HBG2	ENST00000336906.4_2	chr11:5274432-5276041	-	0.0605013	0.00721283
YPEL5-201	YPEL5	ENST00000261353.8_1	chr2:30369827-30383399	+	0.0615401	0.00153666
ITGB1-201	ITGB1	ENST00000302278.7_1	chr10:33189320-33247137	-	0.0615855	0.0126368
RGS10-201	RGS10	ENST00000369101.7_1	chr10:121259437-121286989	-	0.061719	0.00871244
TSC22D3-206	TSC22D3	ENST00000372397.6_1	chrX:106956451-106960365	-	0.0617444	0.0017311
YWHAZ-219	YWHAZ	ENST00000522542.5_1	chr8:101932057-101960390	-	0.0622831	0.018016
ACTG1-216	ACTG1	ENST00000615544.4_1	chr17:79476999-79479781	-	0.0634742	0.00153816
MAP3K7CL-216	MAP3K7CL	ENST00000545939.5_1	chr21:30481453-30548209	+	0.0675852	0.0229888
RPL3-201	RPL3	ENST00000216146.8_1	chr22:39708889-39715776	-	0.0688016	0.0357662
CALM2-201	CALM2	ENST00000272298.11_1	chr2:47387221-47403740	-	0.0691528	0.00128588
FKBP8-206	FKBP8	ENST00000596558.6_3	chr19:18642572-18653782	-	0.0706557	0.00356756
CTTN-202	CTTN	ENST00000346329.7_1	chr11:70244510-70282690	+	0.0723371	0.00271854
PTGS1-203	PTGS1	ENST00000373698.6_3	chr9:125137601-125157981	+	0.0724617	0.00220117
AL161784.1-201	AL161784.1	ENST00000594963.1	chr9:124103625-124110410	+	0.0729542	0.00589482
CFL1-202	CFL1	ENST00000524553.5_1	chr11:65622525-65624435	-	0.0731448	0.0377365
GAPDH-211	GAPDH	ENST00000619601.1_1	chr12:6645771-6647540	+	0.0737992	0.00698118
TRAPPC1-202	TRAPPC1	ENST00000540486.5_1	chr17:7833663-7835317	-	0.0758375	0.0024996
YBX1-202	YBX1	ENST00000332220.10_3	chr1:43148111-43162933	+	0.0758815	0.000131404
CLEC1B-201	CLEC1B	ENST00000298527.10_1	chr12:10145660-10151879	-	0.0765566	0.00418753
HBG1-201	HBG1	ENST00000330597.3_1	chr11:5269313-5271122	-	0.0780135	0.000226692
GPI-201	GPI	ENST00000356487.9_2	chr19:34855931-34891233	+	0.0784058	0.000286463
MSN-206	MSN	ENST00000609672.5_3	chrX:64808257-64949451	+	0.0785267	0.000200441
FXYD5-207	FXYD5	ENST00000541435.6_1	chr19:35645656-35660762	+	0.0787575	0.00154141
MKRN1-201	MKRN1	ENST00000255977.6_3	chr7:140152840-140179369	-	0.0796273	0.00225207
HK1-202	HK1	ENST00000359426.6_1	chr10:71078600-71161638	+	0.0798926	0.00580696
ARHGDIB-203	ARHGDIB	ENST00000536592.5_1	chr12:15094979-15103629	-	0.0807262	0.0225927
CLU-215	CLU	ENST00000523500.5_2	chr8:27455513-27468874	-	0.0809553	0.0209194
MAP1LC3B-201	MAP1LC3B	ENST00000268607.9_1	chr16:87425406-87438385	+	0.081069	0.000551599
LIMS4-204	LIMS4	ENST00000632897.1_1	chr2:111204316-111230618	-	0.0811886	0.00169801
RPL11-201	RPL11	ENST00000374550.7_2	chr1:24018269-24022915	+	0.0822109	0.0153822
RPS18-230	RPS18	ENST00000439602.6_1	chr6:33239787-33244287	+	0.0830428	0.00390831
MYL6-202	MYL6	ENST00000348108.8_2	chr12:56552140-56555371	+	0.0831226	0.00440722
RPS29-201	RPS29	ENST00000245458.10_1	chr14:50050290-50053094	-	0.0831843	0.0133371
FANCL-202	FANCL	ENST00000402135.7_1	chr2:58386382-58468485	-	0.0838559	5.35e-05
MARCH2-201	2019-03-02	ENST00000215555.6_1	chr19:8478187-8503895	+	0.0842466	0.00302619
DNM3-207	DNM3	ENST00000523513.1_3	chr1:171939262-172222718	+	0.0864636	0.00743483
VCL-201	VCL	ENST00000211998.9_2	chr10:75757872-75879918	+	0.0871744	0.00693229
CDKN2D-202	CDKN2D	ENST00000393599.2_1	chr19:10677138-10679654	-	0.0880969	4e-05
MYL6-218	MYL6	ENST00000550697.5_1	chr12:56551945-56555358	+	0.0900962	0.00181758
ANKRD12-205	ANKRD12	ENST00000546007.6_2	chr18:9182384-9254271	+	0.0901763	0.00560552
CCND3-203	CCND3	ENST00000372991.8_1	chr6:41902671-41909586	-	0.0904532	0.00234378
SMS-202	SMS	ENST00000404933.6_1	chrX:21958691-22012953	+	0.0910549	0.000288578
NDUFAF3-201	NDUFAF3	ENST00000326912.8_1	chr3:49057892-49060720	+	0.0913579	0.00430011
CD226-204	CD226	ENST00000579496.5_3	chr18:67540380-67629039	-	0.0913717	0.00579499
HIST1H2BK-201	HIST1H2BK	ENST00000356950.1_1	chr6:27114197-27114577	-	0.0915361	0.00227289
MORC3-201	MORC3	ENST00000400485.5_1	chr21:37692487-37748944	+	0.0923194	0.00109575
ATP2A3-205	ATP2A3	ENST00000397041.7_1	chr17:3827169-3867713	-	0.0923377	0.000674236
CD9-201	CD9	ENST00000009180.8_1	chr12:6309615-6347425	+	0.0923684	0.0194112
ENKUR-202	ENKUR	ENST00000376363.5_1	chr10:25273331-25305085	-	0.0924491	0.00252371
DMTN-216	DMTN	ENST00000520174.5_1	chr8:21914416-21929961	+	0.0933407	0.00112327
RGS10-202	RGS10	ENST00000369103.2_1	chr10:121259437-121302220	-	0.0950764	0.0167094
SELP-205	SELP	ENST00000426706.6_3	chr1:169558087-169588457	-	0.0960486	0.000195275
MPP1-202	MPP1	ENST00000369534.7_1	chrX:154006959-154033796	-	0.096666	0.0067994
NFE2-201	NFE2	ENST00000312156.8_1	chr12:54685895-54689544	-	0.0967081	0.000302601
EIF1B-201	EIF1B	ENST00000232905.3_1	chr3:40351175-40353915	+	0.0972043	0.00274124
DYNLRB1-202	DYNLRB1	ENST00000357156.6_1	chr20:33104214-33128762	+	0.0972496	0.0230787
TAX1BP3-201	TAX1BP3	ENST00000225525.3_1	chr17:3566196-3571976	-	0.0979324	0.00298513
GNB1-201	GNB1	ENST00000378609.8_1	chr1:1716725-1822495	-	0.0980345	0.00334272
RPS9-202	RPS9	ENST00000391751.7_2	chr19:54704742-54711515	+	0.09816	0.00349408
GABARAPL2-201	GABARAPL2	ENST00000037243.6_1	chr16:75600249-75611779	+	0.0984734	0.00117512
UIMC1-211	UIMC1	ENST00000510698.2_1	chr5:176332067-176397794	-	0.0987262	0.00139557
TUBB-205	TUBB	ENST00000327892.12_1	chr6:30687978-30693203	+	0.100391	0.00307856
SPARC-209	SPARC	ENST00000539687.5_1	chr5:151051131-151064791	-	0.10079	0.0282714
CMTM5-202	CMTM5	ENST00000342473.8_1	chr14:23846246-23848981	+	0.10087	0.000233924
ALOX12-201	ALOX12	ENST00000251535.10_1	chr17:6899384-6914055	+	0.101303	0.000850467
PPIA-208	PPIA	ENST00000489459.5_1	chr7:44836280-44841229	+	0.101564	0.00808525
RHEB-207	RHEB	ENST00000496004.5_1	chr7:151164187-151217206	-	0.101759	0.00383138
AGPAT1-203	AGPAT1	ENST00000375107.7_1	chr6:32135989-32143899	-	0.10197	0.00264964
SPARC-204	SPARC	ENST00000521569.1_1	chr5:151046038-151066529	-	0.102107	0.0154669
CLIC1-208	CLIC1	ENST00000375784.7_1	chr6:31698358-31704344	-	0.10314	0.0242346
YBX3-202	YBX3	ENST00000279550.11_1	chr12:10851688-10875906	-	0.103673	0.00436521
ITGB3-202	ITGB3	ENST00000571680.1_1	chr17:45331219-45368853	+	0.10462	0.0100155
C19orf33-201	C19orf33	ENST00000301246.9_2	chr19:38794801-38795649	+	0.104825	0.00120851
SLC44A2-202	SLC44A2	ENST00000407327.8_1	chr19:10713186-10755226	+	0.10483	0.0104874
AP2M1-207	AP2M1	ENST00000439647.5_1	chr3:183894566-183901836	+	0.105806	0.00737214
NAP1L1-224	NAP1L1	ENST00000552056.5_1	chr12:76440684-76462773	-	0.105854	0.0117201
GRAP2-202	GRAP2	ENST00000407075.3_1	chr22:40342821-40367109	+	0.106179	0.00235405
RPL12-201	RPL12	ENST00000361436.9_1	chr9:130209953-130213684	-	0.10668	0.0378848
IGF2BP3-218	IGF2BP3	ENST00000619562.4_1	chr7:23350746-23387323	-	0.107732	0.00145672
GMPR-201	GMPR	ENST00000259727.4_1	chr6:16238811-16295780	+	0.107813	0.00502122
PGRMC1-201	PGRMC1	ENST00000217971.7_1	chrX:118370216-118378429	+	0.107911	0.00315841
DNM3-201	DNM3	ENST00000355305.9_1	chr1:171810640-172377494	+	0.109288	0.000171812
LDHB-201	LDHB	ENST00000350669.5_1	chr12:21788276-21810776	-	0.109606	0.0301355
YWHAZ-216	YWHAZ	ENST00000521309.5_1	chr8:101932057-101964247	-	0.109615	0.02291
EIF4G2-202	EIF4G2	ENST00000396525.6_2	chr11:10818717-10830255	-	0.10995	0.00690634
STRAP-202	STRAP	ENST00000419869.6_1	chr12:16035329-16056412	+	0.110263	0.000285901
UQCRH-201	UQCRH	ENST00000311672.9_1	chr1:46769303-46782448	+	0.111203	0.00251451
MBNL1-221	MBNL1	ENST00000495875.6_1	chr3:151986709-152150706	+	0.1114	0.0252277
PDGFA-203	PDGFA	ENST00000402802.7_1	chr7:536895-559046	-	0.113023	0.00101871
RPS3A-211	RPS3A	ENST00000512797.5_1	chr4:152020820-152025689	+	0.113871	0.0141072
PARK7-201	PARK7	ENST00000338639.9_1	chr1:8021723-8045339	+	0.113999	0.00626331
LAMTOR1-201	LAMTOR1	ENST00000278671.9_1	chr11:71808338-71814433	-	0.114149	0.0151851
NENF-201	NENF	ENST00000366988.4_1	chr1:212606229-212619721	+	0.114336	0.000700559
RUFY1-211	RUFY1	ENST00000508609.5_1	chr5:178989632-179021899	+	0.114354	0.00204175
GLUL-202	GLUL	ENST00000331872.10_1	chr1:182350839-182361341	-	0.114617	0.0134063
ATP5E-201	ATP5E	ENST00000243997.7_1	chr20:57600522-57607437	-	0.115869	0.00106531
HIST1H4B-001	HIST1H4B	ENST00000377364.3	chr6:26027124-26027480	-	0.117112	0.0169743
MFAP3L-201	MFAP3L	ENST00000361618.3_1	chr4:170907749-170947559	-	0.117611	0.000115956
BEX3-201	BEX3	ENST00000361298.8_2	chrX:102631268-102633005	+	0.118189	0.0198187
TNFSF4-202	TNFSF4	ENST00000367718.5_1	chr1:173152873-173174697	-	0.118434	0.0032998
FAXDC2-201	FAXDC2	ENST00000326080.9_2	chr5:154198051-154230466	-	0.118735	0.00142839
DYNLL1-201	DYNLL1	ENST00000242577.10_1	chr12:120933859-120936296	+	0.119004	0.011125
PAIP2-201	PAIP2	ENST00000265192.8_1	chr5:138677521-138705387	+	0.119126	0.0438488
F13A1-202	F13A1	ENST00000414279.5_1	chr6:6266946-6321246	-	0.119704	0.00166488
CAPN1-208	CAPN1	ENST00000527323.5_1	chr11:64949933-64979458	+	0.11992	0.00601581
RPL27-201	RPL27	ENST00000253788.9_1	chr17:41150451-41154976	+	0.120719	0.0484803
HIST1H2BJ-203	HIST1H2BJ	ENST00000607124.1_1	chr6:27093676-27100529	-	0.121333	0.00287504
CETN2-201	CETN2	ENST00000370277.3_1	chrX:151995517-151999321	-	0.121626	0.000722615
TUBB4B-201	TUBB4B	ENST00000340384.4_1	chr9:140135665-140138159	+	0.121816	0.00236389
ACTB-205	ACTB	ENST00000432588.5_1	chr7:5568223-5603415	-	0.122257	0.0336908
HLA-DRB1-201	HLA-DRB1	ENST00000360004.5_2	chr6:32546546-32557625	-	0.122585	0.00692233
RPL34-204	RPL34	ENST00000502534.5_1	chr4:109541725-109546710	+	0.123129	0.0460736
DNAJB6-201	DNAJB6	ENST00000262177.8_1	chr7:157129660-157210133	+	0.123268	0.00558263
STOM-201	STOM	ENST00000286713.6_1	chr9:124101355-124132483	-	0.123277	0.000999082
LIMS1-201	LIMS1	ENST00000332345.10_1	chr2:109204767-109300593	+	0.123442	0.00205364
HIST1H2AC-202	HIST1H2AC	ENST00000377791.3_1	chr6:26124373-26139330	+	0.123616	0.0123222
PSAP-206	PSAP	ENST00000633965.1_1	chr10:73579573-73587891	-	0.124075	0.0156047
HNRNPA1-204	HNRNPA1	ENST00000547276.5_1	chr12:54674564-54679035	+	0.12413	0.0231869
DMTN-220	DMTN	ENST00000523266.5_2	chr8:21916717-21940029	+	0.12467	0.0224559
LY6G6F-201	LY6G6F	ENST00000375832.4_1	chr6:31674662-31678372	+	0.124733	0.0124611
MORF4L1-203	MORF4L1	ENST00000426013.6_1	chr15:79165118-79190075	+	0.125111	0.0399658
THOC7-201	THOC7	ENST00000295899.9_1	chr3:63819546-63849579	-	0.125182	0.000667135
GSTO1-202	GSTO1	ENST00000369713.9_1	chr10:106014493-106027215	+	0.125782	0.00648689
EIF1-207	EIF1	ENST00000591776.5_1	chr17:39845139-39847464	+	0.125864	0.0467454
HIST1H2BJ-201	HIST1H2BJ	ENST00000339812.2_1	chr6:27100149-27100529	-	0.125887	0.00993913
RPL24-203	RPL24	ENST00000469605.1_1	chr3:101400886-101405539	-	0.126748	0.0127746
ZNF185-206	ZNF185	ENST00000426821.6_1	chrX:152088893-152142017	+	0.127597	0.00765664
MZT2A-201	MZT2A	ENST00000309451.6_1	chr2:132241533-132249995	-	0.128055	0.00398891
UBE2L6-201	UBE2L6	ENST00000287156.8_1	chr11:57319135-57335280	-	0.128476	0.0220585
RPL38-202	RPL38	ENST00000439590.6_1	chr17:72199721-72206019	+	0.128958	0.016355
LDLRAP1-201	LDLRAP1	ENST00000374338.4_1	chr1:25870071-25895377	+	0.129124	0.00174323
SMOX-202	SMOX	ENST00000305958.8_1	chr20:4129426-4168394	+	0.129227	0.0066949
RAB11A-206	RAB11A	ENST00000567671.1_2	chr15:66162351-66180129	+	0.12963	0.0247551
CORO1C-201	CORO1C	ENST00000261401.7_1	chr12:109038885-109125372	-	0.129712	0.0257181
TMEM40-205	TMEM40	ENST00000435575.5_3	chr3:12775057-12800776	-	0.129778	0.00174825
RPL18-201	RPL18	ENST00000084795.9_3	chr19:49118588-49121141	-	0.130342	0.0482378
LEPROT-201	LEPROT	ENST00000371065.8_1	chr1:65886270-65901690	+	0.13058	0.00629118
TSPAN33-201	TSPAN33	ENST00000486685.2_1	chr7:128784732-128808637	+	0.130614	0.00456193
TREML1-203	TREML1	ENST00000437044.2_1	chr6:41117342-41122070	-	0.130724	0.00085856
HNRNPA1-206	HNRNPA1	ENST00000547708.5_1	chr12:54674532-54677662	+	0.132768	0.00423471
FTH1-202	FTH1	ENST00000526640.5_1	chr11:61732057-61735079	-	0.132867	0.00587039
RPL35A-205	RPL35A	ENST00000448864.5_1	chr3:197677065-197682722	+	0.133426	0.0355476
HGD-201	HGD	ENST00000283871.9_1	chr3:120347020-120401418	-	0.133703	0.000236712
MAT2B-202	MAT2B	ENST00000321757.10_1	chr5:162932554-162946328	+	0.133882	0.00139826
YBX3-201	YBX3	ENST00000228251.8_1	chr12:10851812-10875911	-	0.133888	0.00291256
ZMAT2-201	ZMAT2	ENST00000274712.7_1	chr5:140079919-140086261	+	0.134018	0.005567
CDK2AP1-201	CDK2AP1	ENST00000261692.6_1	chr12:123745528-123756687	-	0.134164	0.00363863
BIN2-210	BIN2	ENST00000615107.4_3	chr12:51674822-51717982	-	0.134342	0.0288971
APP-201	APP	ENST00000346798.7_1	chr21:27252861-27542972	-	0.134377	0.00812667
ODC1-201	ODC1	ENST00000234111.8_1	chr2:10580094-10588630	-	0.135046	0.0031122
HIST1H2BG-001	HIST1H2BG	ENST00000244601.3	chr6:26216428-26216872	-	0.135837	0.00879172
PKM-203	PKM	ENST00000389093.7_1	chr15:72491370-72523727	-	0.136514	0.0167028
MGLL-202	MGLL	ENST00000398101.7_1	chr3:127410960-127455200	-	0.136715	0.00213736
P2RY12-201	P2RY12	ENST00000302632.3_1	chr3:151055168-151102600	-	0.1368	0.000743747
SIAH2-201	SIAH2	ENST00000312960.3_1	chr3:150458914-150481164	-	0.136878	0.00194355
PROS1-202	PROS1	ENST00000394236.7_1	chr3:93591877-93692910	-	0.136965	0.00109268
CTSA-203	CTSA	ENST00000372459.6_1	chr20:44520015-44527425	+	0.138144	0.0375701
TRIM58-201	TRIM58	ENST00000366481.3_1	chr1:248020501-248041507	+	0.138644	0.00408462
LGALSL-201	LGALSL	ENST00000238875.9_1	chr2:64681226-64688515	+	0.139396	0.00131412
SNRPN-202	SNRPN	ENST00000390687.8_1	chr15:25200074-25223870	+	0.139671	0.0104643
BCAP31-201	BCAP31	ENST00000345046.10_1	chrX:152965952-152990152	-	0.140879	0.0195572
CD68-201	CD68	ENST00000250092.10_1	chr17:7482785-7485431	+	0.141018	0.00486357
CTSA-201	CTSA	ENST00000191018.9_1	chr20:44519980-44527459	+	0.141149	0.0141992
RPL8-202	RPL8	ENST00000394920.6_1	chr8:146015154-146017774	-	0.141716	0.0475075
ADD3-202	ADD3	ENST00000356080.8_1	chr10:111767720-111893969	+	0.142212	0.000666941
CSDE1-214	CSDE1	ENST00000530886.5_1	chr1:115259926-115300648	-	0.142441	0.023161
BANK1-203	BANK1	ENST00000444316.2_2	chr4:102734983-102995896	+	0.142468	0.0153033
C7orf73-202	C7orf73	ENST00000507606.2_1	chr7:135347269-135361160	+	0.142497	0.00610506
IMPDH2-201	IMPDH2	ENST00000326739.8_1	chr3:49061758-49066823	-	0.142564	0.0101186
TRAPPC1-205	TRAPPC1	ENST00000572656.2_1	chr17:7834413-7835441	-	0.142611	0.0140748
BEST1-202	BEST1	ENST00000449131.6_1	chr11:61717842-61732987	+	0.142836	0.000233964
ITGA2B-201	ITGA2B	ENST00000262407.5_1	chr17:42449551-42466873	-	0.14337	0.0021075
PCGF5-205	PCGF5	ENST00000614189.4_1	chr10:92922769-93044086	+	0.14349	0.0311156
PIP4K2A-202	PIP4K2A	ENST00000376573.8_1	chr10:22823778-23003484	-	0.143623	2.94e-05
RPS3-207	RPS3	ENST00000526608.5_1	chr11:75110581-75115912	+	0.144331	0.0315989
RPS15-212	RPS15	ENST00000593052.5_1	chr19:1438418-1440493	+	0.144337	0.0296635
ANXA1-201	ANXA1	ENST00000257497.10_1	chr9:75766673-75785309	+	0.144396	0.00791296
APP-205	APP	ENST00000358918.7_2	chr21:27253921-27542985	-	0.144474	0.0252142
MRPL51-201	MRPL51	ENST00000229238.4_1	chr12:6601052-6602764	-	0.144752	0.00183696
RAB13-201	RAB13	ENST00000368575.3_1	chr1:153954127-153958828	-	0.144756	0.00544049
MBNL1-204	MBNL1	ENST00000324210.9_1	chr3:151986752-152183552	+	0.144822	0.0341218
HIST1H2BL-201	HIST1H2BL	ENST00000377401.3_1	chr6:27775222-27775709	-	0.145295	0.00330972
NDUFA5-202	NDUFA5	ENST00000378795.8_2	chr7:123181150-123197509	-	0.145389	0.0164312
RPS17-201	RPS17	ENST00000330244.10_1	chr15:83205504-83209315	-	0.145708	0.011204
HIST1H4E-201	HIST1H4E	ENST00000615164.2_1	chr6:26204780-26206266	+	0.146082	0.00127254
LBH-201	LBH	ENST00000395323.7_1	chr2:30454397-30482894	+	0.14614	0.0174695
ETFA-203	ETFA	ENST00000557943.5_1	chr15:76507696-76603810	-	0.146578	0.000303679
HIST1H2AD-201	HIST1H2AD	ENST00000341023.1_1	chr6:26199079-26199471	-	0.146739	0.00059939
ILK-203	ILK	ENST00000420936.6_1	chr11:6624988-6632064	+	0.147688	0.0441954
BCL2L1-202	BCL2L1	ENST00000376055.8_1	chr20:30252255-30310663	-	0.147834	0.000157792
MPIG6B-204	MPIG6B	ENST00000375809.7_1	chr6:31691150-31694491	+	0.148265	0.00574855
PSMA7-203	PSMA7	ENST00000370873.8_1	chr20:60711791-60718486	-	0.148473	0.0140348
CLTA-202	CLTA	ENST00000345519.9_2	chr9:36190920-36212053	+	0.148974	0.0103209
MFSD1-201	MFSD1	ENST00000264266.12_2	chr3:158519880-158546905	+	0.149552	0.0444539
FKBP1A-203	FKBP1A	ENST00000381724.7_1	chr20:1350224-1373682	-	0.149972	0.0290214
ISCA1-203	ISCA1	ENST00000375991.8_1	chr9:88879461-88897444	-	0.150756	0.00444359
PARD3-208	PARD3	ENST00000374789.7_1	chr10:34398489-35104249	-	0.15087	1.54e-05
GDI1-204	GDI1	ENST00000447750.6_1	chrX:153665266-153671814	+	0.151153	0.00467356
MYLK-212	MYLK	ENST00000508240.1_1	chr3:123375973-123411226	-	0.15187	0.0218162
SNX17-201	SNX17	ENST00000233575.6_1	chr2:27593389-27599995	+	0.152449	0.00192506
CLU-216	CLU	ENST00000523589.5_2	chr8:27461827-27472207	-	0.152529	0.00226639
PCBP2-207	PCBP2	ENST00000546463.5_1	chr12:53846109-53873467	+	0.152765	0.0169143
RHOA-203	RHOA	ENST00000422781.5_2	chr3:49397555-49449403	-	0.154181	0.00925357
SUB1-201	SUB1	ENST00000265073.8_1	chr5:32585605-32604185	+	0.154478	0.00141452
HIGD1A-201	HIGD1A	ENST00000321331.11_1	chr3:42825790-42846023	-	0.154714	0.00150733
CHD9-216	CHD9	ENST00000565803.1_1	chr16:53241901-53302039	+	0.154748	0.0120108
LCN2-201	LCN2	ENST00000277480.6_3	chr9:130911732-130915734	+	0.155002	0.00293359
RPS20-212	RPS20	ENST00000618656.1_1	chr8:56982297-56987140	-	0.155062	0.0397509
CMTM5-205	CMTM5	ENST00000397227.7_1	chr14:23846246-23848981	+	0.155319	0.00856145
SVIP-201	SVIP	ENST00000354193.4_1	chr11:22840475-22851411	-	0.155329	0.00054892
PPP3R1-201	PPP3R1	ENST00000234310.7_1	chr2:68405989-68479663	-	0.155732	0.0046403
SELENOF-208	SELENOF	ENST00000616787.4_3	chr1:87328130-87380107	-	0.156415	0.000188318
RAB4A-205	RAB4A	ENST00000618010.4_1	chr1:229406809-229441638	+	0.156788	0.00240253
RIPOR2-206	RIPOR2	ENST00000538035.5_3	chr6:24804510-24936280	-	0.157613	0.00709745
TREML1-201	TREML1	ENST00000373127.8_1	chr6:41117080-41122075	-	0.158355	0.0411
JAM3-201	JAM3	ENST00000299106.8_2	chr11:133938820-134021896	+	0.158638	0.000308995
TUBA8-203	TUBA8	ENST00000416740.1_1	chr22:18603874-18613884	+	0.158787	0.00319808
SUSD1-204	SUSD1	ENST00000374270.7_1	chr9:114803065-114937688	-	0.158982	0.00157273
AMFR-201	AMFR	ENST00000290649.9_2	chr16:56395364-56459450	-	0.159051	7.89e-05
ATP6V1G1-201	ATP6V1G1	ENST00000374050.3_1	chr9:117350026-117360653	+	0.15939	0.0118417
SLC2A3-201	SLC2A3	ENST00000075120.11_1	chr12:8071826-8088871	-	0.159503	0.00970941
ACTR3B-201	ACTR3B	ENST00000256001.12_1	chr7:152456834-152552463	+	0.159616	0.00191074
RAP1B-230	RAP1B	ENST00000543697.5_1	chr12:69004719-69053221	+	0.159736	0.0444849
ARL6IP5-201	ARL6IP5	ENST00000273258.3_1	chr3:69134095-69155217	+	0.159821	0.0109754
CD74-206	CD74	ENST00000518797.5_2	chr5:149781262-149792295	-	0.159824	0.00908797
CDC42-204	CDC42	ENST00000411827.1_1	chr1:22379790-22413283	+	0.160241	0.0289769
FSTL1-201	FSTL1	ENST00000295633.7_1	chr3:120111140-120170100	-	0.160584	0.000626024
VEPH1-216	VEPH1	ENST00000489602.1_1	chr3:157188291-157251403	-	0.160595	0.00439683
EIF3F-201	EIF3F	ENST00000309828.4_1	chr11:8008867-8017716	+	0.160695	0.00263897
ATP6V1F-201	ATP6V1F	ENST00000249289.4_1	chr7:128502880-128505897	+	0.160962	0.00711684
FYN-205	FYN	ENST00000368682.7_1	chr6:111981535-112194270	-	0.160971	0.00551763
CGGBP1-201	CGGBP1	ENST00000309534.10_1	chr3:88101094-88108198	-	0.160987	0.00819754
STXBP2-221	STXBP2	ENST00000602355.1_1	chr19:7710845-7712696	+	0.161324	0.0146807
GIMAP4-201	GIMAP4	ENST00000255945.3_1	chr7:150264365-150271043	+	0.161331	0.0328284
OAZ1-202	OAZ1	ENST00000582888.8_3	chr19:2269533-2273330	+	0.161482	0.0352572
RBPMS2-201	RBPMS2	ENST00000300069.4_1	chr15:65032097-65067786	-	0.161758	0.00288079
HIST1H2AG-201	HIST1H2AG	ENST00000359193.3_1	chr6:27100821-27103070	+	0.161856	0.00149276
PARK7-207	PARK7	ENST00000469225.1_1	chr1:8025411-8045342	+	0.161963	0.0031849
GAPDH-201	GAPDH	ENST00000229239.9_1	chr12:6643093-6647537	+	0.16216	0.00373
RDH11-201	RDH11	ENST00000381346.8_1	chr14:68143518-68162531	-	0.162551	0.0060046
DYNLRB1-203	DYNLRB1	ENST00000374846.3_1	chr20:33104260-33128762	+	0.162726	0.00183018
TMEM91-209	TMEM91	ENST00000539627.5_1	chr19:41856816-41889988	+	0.163054	0.00132788
ELOVL7-201	ELOVL7	ENST00000425382.5_1	chr5:60047619-60140101	-	0.163102	0.0226515
EIF4G2-232	EIF4G2	ENST00000640650.1_1	chr11:10819363-10828842	-	0.16398	0.0408518
RAB37-204	RAB37	ENST00000392613.9_4	chr17:72733356-72743439	+	0.164827	0.0260764
CMTM6-201	CMTM6	ENST00000205636.3_1	chr3:32522804-32544900	-	0.165184	0.00101442
THBS1-201	THBS1	ENST00000260356.5_1	chr15:39873294-39891667	+	0.166148	0.000998786
PNKD-202	PNKD	ENST00000258362.7_1	chr2:219187896-219211514	+	0.166494	0.00381134
OSTF1-201	OSTF1	ENST00000346234.6_1	chr9:77703459-77762181	+	0.168003	0.0260346
EIF2AK1-201	EIF2AK1	ENST00000199389.10_1	chr7:6061875-6098861	-	0.168128	0.000719997
RNF11-201	RNF11	ENST00000242719.3_1	chr1:51701943-51739127	+	0.168377	9.73e-05
CXCR4-201	CXCR4	ENST00000241393.3_1	chr2:136871921-136875735	-	0.168455	0.00255535
BCL2L1-203	BCL2L1	ENST00000376062.6_1	chr20:30252255-30310400	-	0.168525	0.0219943
TUBA1A-207	TUBA1A	ENST00000550767.5_1	chr12:49578793-49580647	-	0.169817	0.0287796
PNMA1-201	PNMA1	ENST00000316836.4_1	chr14:74178486-74181075	-	0.171023	0.000198029
CRAT-201	CRAT	ENST00000318080.6_1	chr9:131857089-131873083	-	0.17168	0.000125001
KIF2A-210	KIF2A	ENST00000514082.5_1	chr5:61602279-61657106	+	0.17169	0.0290176
CPT1A-201	CPT1A	ENST00000265641.9_1	chr11:68522357-68609384	-	0.172216	0.000478513
LSM14A-201	LSM14A	ENST00000433627.9_1	chr19:34663473-34720193	+	0.172333	0.000277918
PPA1-202	PPA1	ENST00000373232.7_1	chr10:71962586-71993183	-	0.173109	0.0123877
RABGAP1L-218	RABGAP1L	ENST00000489615.5_1	chr1:174769070-174964445	+	0.173262	0.00214792
ATP6V1E1-201	ATP6V1E1	ENST00000253413.9_1	chr22:18074902-18111584	-	0.173409	0.0114618
SLC35D2-201	SLC35D2	ENST00000253270.11_1	chr9:99082988-99145979	-	0.173435	0.00302359
ABCC4-201	ABCC4	ENST00000376887.8_1	chr13:95672083-95953683	-	0.174011	0.0121262
HLA-DMA-201	HLA-DMA	ENST00000374843.8_1	chr6:32916390-32920899	-	0.174719	0.00372954
RTN3-208	RTN3	ENST00000537981.5_2	chr11:63448972-63527357	+	0.175371	0.0457314
SPINT2-201	SPINT2	ENST00000301244.11_1	chr19:38755098-38783254	+	0.175966	0.00156162
USP12-201	USP12	ENST00000282344.10_1	chr13:27640279-27746033	-	0.175993	5.31e-05
GP9-201	GP9	ENST00000307395.4_1	chr3:128779610-128781249	+	0.176272	0.0271322
CLCN3-211	CLCN3	ENST00000613795.4_3	chr4:170581213-170644338	+	0.176778	0.00605333
GNAZ-203	GNAZ	ENST00000615612.1_1	chr22:23412547-23467224	+	0.17705	0.00215839
PYCR2-209	PYCR2	ENST00000612651.4_1	chr1:226107577-226111810	-	0.177074	0.027919
PEBP1-201	PEBP1	ENST00000261313.2_1	chr12:118573663-118583389	+	0.177135	0.00104421
UGP2-201	UGP2	ENST00000337130.9_1	chr2:64068844-64118696	+	0.177381	0.00281233
TSPO-202	TSPO	ENST00000337554.7_1	chr22:43547520-43559248	+	0.177433	0.0166802
NMI-201	NMI	ENST00000243346.9_1	chr2:152126979-152146571	-	0.17754	0.0071424
PRDX6-201	PRDX6	ENST00000340385.5_1	chr1:173446405-173457946	+	0.177711	0.0335959
TSC22D1-203	TSC22D1	ENST00000458659.2_3	chr13:45007655-45150701	-	0.177765	0.00703693
BEND2-202	BEND2	ENST00000380033.8_1	chrX:18181051-18239003	-	0.177929	0.00395282
DDT-202	DDT	ENST00000398344.8_1	chr22:24313554-24316773	-	0.177938	0.000268951
GSTO1-204	GSTO1	ENST00000445155.5_3	chr10:106014744-106027123	+	0.17858	0.019577
NDFIP1-201	NDFIP1	ENST00000253814.5_1	chr5:141488070-141534008	+	0.179511	0.00415025
YWHAB-201	YWHAB	ENST00000353703.8_2	chr20:43514317-43537173	+	0.1801	0.0362219
RPS23-201	RPS23	ENST00000296674.12_1	chr5:81569177-81574396	-	0.180358	0.00172697
EEF1D-202	EEF1D	ENST00000395119.7_1	chr8:144661898-144679849	-	0.181308	0.0194241
MAX-217	MAX	ENST00000557277.5_2	chr14:65543180-65569408	-	0.181495	0.0138992
TBL1XR1-214	TBL1XR1	ENST00000457928.6_1	chr3:176741127-176915184	-	0.181526	0.00337211
LYL1-201	LYL1	ENST00000264824.4_1	chr19:13209847-13213681	-	0.181544	0.016208
H2AFZ-201	H2AFZ	ENST00000296417.5_1	chr4:100869245-100871545	-	0.181869	0.0267077
CCDC7-215	CCDC7	ENST00000639629.1_2	chr10:32740571-33165321	+	0.182243	0.00190854
PSMB3-211	PSMB3	ENST00000619426.4_1	chr17:36908989-36920484	+	0.182456	0.000164199
DYNLL2-201	DYNLL2	ENST00000579991.2_1	chr17:56160776-56172897	+	0.182932	0.00208232
SH3BGRL3-202	SH3BGRL3	ENST00000319041.6_1	chr1:26606613-26607941	+	0.182997	0.0144573
RPL32-202	RPL32	ENST00000396953.6_2	chr3:12877559-12883028	-	0.183113	0.0115449
TERF2IP-201	TERF2IP	ENST00000300086.4_1	chr16:75681684-75691330	+	0.183166	0.00536497
GP5-201	GP5	ENST00000401815.1_1	chr3:194115550-194119083	-	0.183189	0.000411889
DERA-201	DERA	ENST00000428559.6_1	chr12:16064106-16190216	+	0.183953	0.00108324
LSM8-201	LSM8	ENST00000249299.6_1	chr7:117824086-117832878	+	0.184416	0.0182805
RPL23A-204	RPL23A	ENST00000422514.6_1	chr17:27046411-27051377	+	0.184569	0.00927581
RPL26-206	RPL26	ENST00000582556.5_1	chr17:8280867-8286484	-	0.184604	0.0394894
ARPC2-201	ARPC2	ENST00000295685.14_1	chr2:219081933-219119079	+	0.185063	0.0131324
CASP1-215	CASP1	ENST00000533400.5_1	chr11:104896235-104905876	-	0.185149	0.00276085
ENDOD1-201	ENDOD1	ENST00000278505.4_1	chr11:94822974-94865809	+	0.185269	0.00455419
CDC14B-201	CDC14B	ENST00000375240.7_1	chr9:99264868-99381660	-	0.185605	0.00595585
SOD1-201	SOD1	ENST00000270142.10_1	chr21:33031935-33041244	+	0.185835	0.022668
C1QBP-201	C1QBP	ENST00000225698.8_1	chr17:5336097-5342475	-	0.186297	0.00281925
HACD4-202	HACD4	ENST00000495827.2_1	chr9:20999514-21031635	-	0.186355	0.00110486
PTPN12-206	PTPN12	ENST00000435495.6_1	chr7:77167386-77268937	+	0.186746	0.00262418
STK40-204	STK40	ENST00000373132.3_1	chr1:36805225-36851497	-	0.186779	0.00794448
HIST1H4J-201	HIST1H4J	ENST00000355057.2_1	chr6:27791886-27792258	+	0.187058	0.0239977
SRSF6-201	SRSF6	ENST00000244020.4_1	chr20:42086568-42092887	+	0.187551	0.0314186
ATP5L-201	ATP5L	ENST00000300688.7_1	chr11:118271869-118280566	+	0.187648	0.0120632
PTPN12-215	PTPN12	ENST00000522115.6_1	chr7:77200408-77240145	+	0.187784	0.0307921
OST4-201	OST4	ENST00000429985.1_1	chr2:27293355-27294517	-	0.188093	0.0267986
RPS15-201	RPS15	ENST00000233609.8_1	chr19:1438357-1440493	+	0.188163	0.00527512
YPEL2-201	YPEL2	ENST00000312655.8_1	chr17:57409063-57479090	+	0.188301	5.15e-05
PTP4A2-220	PTP4A2	ENST00000627328.2_1	chr1:32378604-32385071	-	0.188881	0.0303269
P2RX1-201	P2RX1	ENST00000225538.3_1	chr17:3799886-3819794	-	0.188953	0.00854678
UXT-201	UXT	ENST00000333119.7_1	chrX:47511197-47518560	-	0.189048	0.00219096
ZFAND6-211	ZFAND6	ENST00000559157.5_1	chr15:80351977-80430702	+	0.189318	0.000913412
FOXJ3-208	FOXJ3	ENST00000454417.1_1	chr1:42730602-42744258	-	0.18965	0.0040962
PLA2G4A-201	PLA2G4A	ENST00000367466.3_1	chr1:186798085-186958113	+	0.189899	0.000258315
GUCY1B3-201	GUCY1B3	ENST00000264424.12_1	chr4:156680211-156728743	+	0.189984	0.0192225
NAP1L4-222	NAP1L4	ENST00000620138.4_1	chr11:2965661-3013607	-	0.190736	0.0034961
MDM1-201	MDM1	ENST00000303145.11_1	chr12:68688348-68726112	-	0.191267	0.00165264
SPCS3-201	SPCS3	ENST00000503362.1_1	chr4:177241115-177253396	+	0.191718	0.000912683
B4GALT1-201	B4GALT1	ENST00000379731.4_1	chr9:33110635-33167354	-	0.191736	0.0020369
PSMA2-201	PSMA2	ENST00000223321.8_1	chr7:42956456-42971822	-	0.191803	0.00655688
PGD-201	PGD	ENST00000270776.12_1	chr1:10459137-10480201	+	0.192411	0.0179596
DAD1-201	DAD1	ENST00000250498.8_1	chr14:23033805-23058175	-	0.192517	0.0321663
CCDC91-220	CCDC91	ENST00000545336.5_1	chr12:28343379-28703099	+	0.19275	0.00665767
CYB5R3-201	CYB5R3	ENST00000352397.9_1	chr22:43014814-43045574	-	0.192793	0.0113669
PSME1-201	PSME1	ENST00000206451.10_1	chr14:24605367-24608176	+	0.193238	0.0400765
CMIP-202	CMIP	ENST00000537098.7_1	chr16:81478775-81745367	+	0.193446	0.000795101
ARHGAP18-201	ARHGAP18	ENST00000368149.2_1	chr6:129897277-130031370	-	0.193501	0.00934077
BANF1-201	BANF1	ENST00000312175.6_1	chr11:65769550-65771620	+	0.193585	0.0119033
PSMA6-201	PSMA6	ENST00000261479.8_1	chr14:35761563-35786680	+	0.193983	0.0419578
MARCH2-204	2019-03-02	ENST00000595142.5_1	chr19:8478174-8491552	+	0.19406	0.00194554
PDE5A-203	PDE5A	ENST00000394439.5_1	chr4:120415552-120549239	-	0.194495	0.00947753
RANBP9-201	RANBP9	ENST00000011619.5_1	chr6:13621730-13711796	-	0.194732	0.014041
ARPP19-208	ARPP19	ENST00000566423.5_1	chr15:52839242-52861436	-	0.194785	0.00647932
SP100-206	SP100	ENST00000409897.5_1	chr2:231281471-231335245	+	0.1948	0.016664
NRGN-202	NRGN	ENST00000412681.2_1	chr11:124609941-124617102	+	0.195176	0.0042482
MAT2A-201	MAT2A	ENST00000306434.7_1	chr2:85766288-85772403	+	0.195238	0.00582488
CLU-217	CLU	ENST00000560566.5_4	chr8:27461883-27469268	-	0.195435	0.0375219
DAP-201	DAP	ENST00000230895.10_3	chr5:10679342-10761384	-	0.196354	0.00367386
LEPR-205	LEPR	ENST00000371060.7_1	chr1:65886335-66101111	+	0.196899	7.79e-05
F2R-201	F2R	ENST00000319211.4_1	chr5:76011868-76031606	+	0.196992	0.00440027
FBXW7-212	FBXW7	ENST00000604872.5_1	chr4:153332312-153456392	-	0.19764	0.00617913
PMVK-201	PMVK	ENST00000368467.3_1	chr1:154897210-154909467	-	0.198138	0.0127965
OTUD5-202	OTUD5	ENST00000376488.7_1	chrX:48779489-48814861	-	0.198196	0.00191764
PKIG-202	PKIG	ENST00000372886.5_1	chr20:43211190-43247678	+	0.198315	0.00255648
CLCN3-206	CLCN3	ENST00000507875.5_1	chr4:170581213-170634338	+	0.19837	0.00520737
CSK-202	CSK	ENST00000439220.6_1	chr15:75074430-75095223	+	0.199099	0.00999805
TOB1-202	TOB1	ENST00000499247.2_1	chr17:48939584-48943706	-	0.199158	0.00712753
FIS1-201	FIS1	ENST00000223136.4_1	chr7:100882893-100888366	-	0.199287	0.00399573
USMG5-201	USMG5	ENST00000309579.7_1	chr10:105148807-105156223	-	0.199486	0.0257129
RPL8-212	RPL8	ENST00000532702.1_1	chr8:146015740-146017769	-	0.199521	0.00944336
CABP5-201	CABP5	ENST00000293255.2_1	chr19:48533210-48547310	-	0.199693	0.00993838
NPM1-203	NPM1	ENST00000393820.2_1	chr5:170814855-170834129	+	0.199699	0.0264069
GPX1-204	GPX1	ENST00000620890.1_3	chr3:49394613-49395791	-	0.199959	0.0370219
NEXN-201	NEXN	ENST00000330010.12_1	chr1:78354200-78409576	+	0.200063	0.00454279
TTC33-201	TTC33	ENST00000337702.4_1	chr5:40714577-40756077	-	0.200195	0.00301395
CDC42SE2-201	CDC42SE2	ENST00000360515.7_1	chr5:130599768-130730383	+	0.200491	0.00965141
MLLT3-201	MLLT3	ENST00000380321.5_1	chr9:20346404-20382467	-	0.201069	0.00692217
PRDX5-201	PRDX5	ENST00000265462.8_1	chr11:64085560-64089283	+	0.201117	0.0430033
STOM-203	STOM	ENST00000538954.5_1	chr9:124101266-124132582	-	0.201159	0.0141967
COMMD7-201	COMMD7	ENST00000278980.10_1	chr20:31290493-31331803	-	0.201765	0.00548341
DIMT1-201	DIMT1	ENST00000199320.8_1	chr5:61683081-61699760	-	0.201873	0.0111004
PKHD1L1-201	PKHD1L1	ENST00000378402.9_1	chr8:110374706-110542559	+	0.202055	0.00778188
ASAH1-240	ASAH1	ENST00000636997.1_1	chr8:17914412-17941609	-	0.202785	0.0322551
ARPC4-208	ARPC4	ENST00000498623.6_1	chr3:9834179-9848126	+	0.202798	0.0135345
SLC39A3-201	SLC39A3	ENST00000269740.8_1	chr19:2732522-2740150	-	0.202936	0.00303546
TM2D2-201	TM2D2	ENST00000397070.6_1	chr8:38848324-38854028	-	0.203893	0.00745687
TDRP-201	TDRP	ENST00000324079.10_1	chr8:439803-494998	-	0.203978	0.00748646
SSR4-203	SSR4	ENST00000370086.7_2	chrX:153060094-153063960	+	0.204055	0.0219575
HEMGN-202	HEMGN	ENST00000616898.1_1	chr9:100689073-100700675	-	0.204279	0.00805912
VRK1-201	VRK1	ENST00000216639.7_1	chr14:97263641-97347950	+	0.204368	0.0128874
NRAS-201	NRAS	ENST00000369535.4_1	chr1:115247090-115259515	-	0.204377	0.00154569
AP000758.1-201	AP000758.1	ENST00000595283.1	chr11:120329880-120330047	-	0.205125	0.0104665
UBA52-202	UBA52	ENST00000442744.6_1	chr19:18682670-18688360	+	0.205252	0.00837399
DAB2-201	DAB2	ENST00000320816.10_1	chr5:39371780-39425272	-	0.205452	0.0276492
RPS7-202	RPS7	ENST00000403564.5_1	chr2:3622915-3628509	+	0.205487	0.0113416
PCMT1-203	PCMT1	ENST00000367384.6_1	chr6:150070579-150132556	+	0.205682	0.0264946
ZNF185-203	ZNF185	ENST00000324823.10_1	chrX:152086665-152142015	+	0.205993	0.0109294
CD79B-203	CD79B	ENST00000392795.7_1	chr17:62006100-62009696	-	0.206008	0.0076131
EHD3-201	EHD3	ENST00000322054.9_1	chr2:31457203-31492313	+	0.206334	0.00807059
RIT1-202	RIT1	ENST00000368323.7_1	chr1:155867599-155881195	-	0.206933	0.00451432
EFCAB13-201	EFCAB13	ENST00000331493.6_3	chr17:45401347-45518678	+	0.207151	0.0133834
SUSD3-202	SUSD3	ENST00000375472.7_1	chr9:95820989-95847420	+	0.207678	0.00275615
IL32-207	IL32	ENST00000444393.7_2	chr16:3115611-3119552	+	0.207763	0.00234743
POU2AF1-201	POU2AF1	ENST00000393067.7_1	chr11:111222977-111250417	-	0.208311	0.00544852
MIS18BP1-201	MIS18BP1	ENST00000310806.8_1	chr14:45672393-45722605	-	0.208427	0.000508211
RC3H2-203	RC3H2	ENST00000373670.5_1	chr9:125606835-125660389	-	0.208497	0.00218819
MRPL30-201	MRPL30	ENST00000338148.7_1	chr2:99797542-99814089	+	0.208499	0.000818708
FBL-206	FBL	ENST00000597224.5_3	chr19:40325331-40331362	-	0.208838	0.00746959
FRMD3-202	FRMD3	ENST00000328788.5_1	chr9:85857905-85882202	-	0.20905	0.00949106
ARHGEF12-201	ARHGEF12	ENST00000356641.7_2	chr11:120207623-120357769	+	0.209335	0.0298361
NPM1-202	NPM1	ENST00000351986.10_1	chr5:170814833-170837888	+	0.209683	0.0267857
PPP1R14A-201	PPP1R14A	ENST00000301242.8_1	chr19:38741877-38747231	-	0.209757	0.00616085
TLK1-205	TLK1	ENST00000431350.6_1	chr2:171847333-172017343	-	0.210184	0.0320843
YPEL5-202	YPEL5	ENST00000379519.7_1	chr2:30369807-30383399	+	0.210208	0.00779467
CYB5R1-201	CYB5R1	ENST00000367249.8_1	chr1:202930997-202936408	-	0.210479	0.00883478
MAPKAPK2-202	MAPKAPK2	ENST00000367103.3_1	chr1:206858382-206907628	+	0.210579	0.0274547
FLOT2-202	FLOT2	ENST00000394908.8_2	chr17:27206353-27224697	-	0.210589	0.0108368
PFDN5-202	PFDN5	ENST00000334478.8_1	chr12:53689336-53693234	+	0.210634	0.0332172
RPS20-207	RPS20	ENST00000520627.1_1	chr8:56985613-56987069	-	0.210774	0.00500487
POC1B-202	POC1B	ENST00000393179.8_1	chr12:89813495-89919392	-	0.210819	0.00403854
EGF-206	EGF	ENST00000509793.5_1	chr4:110834040-110933150	+	0.211016	0.0226207
NT5M-207	NT5M	ENST00000616989.1_1	chr17:17206649-17250975	+	0.211243	0.00242733
C14orf2-201	C14orf2	ENST00000286953.7_1	chr14:104378625-104387894	-	0.211247	0.0144396
EGLN2-207	EGLN2	ENST00000593726.5_1	chr19:41305450-41314338	+	0.211369	0.00528959
MTURN-203	MTURN	ENST00000409688.1_1	chr7:30174604-30197585	+	0.211393	0.0106136
Z82206.1-201	Z82206.1	ENST00000424496.2_2	chr22:40356401-40360722	+	0.2114	0.0488137
RAP1B-219	RAP1B	ENST00000538980.5_1	chr12:69004698-69050930	+	0.21142	0.0043725
GLRX3-201	GLRX3	ENST00000331244.9_1	chr10:131934663-131977928	+	0.211453	0.00781811
SLC24A3-201	SLC24A3	ENST00000328041.10_1	chr20:19193290-19703581	+	0.211472	0.00223555
CCT5-201	CCT5	ENST00000280326.8_1	chr5:10250033-10266524	+	0.211559	0.0023387
PRKAR1B-204	PRKAR1B	ENST00000406797.5_1	chr7:588835-752844	-	0.21216	0.00147906
PRKAR1A-217	PRKAR1A	ENST00000589228.5_1	chr17:66508568-66529572	+	0.212724	0.0155056
TSPAN13-201	TSPAN13	ENST00000262067.4_1	chr7:16793160-16824161	+	0.213287	0.00322408
MRPL3-201	MRPL3	ENST00000264995.7_1	chr3:131181056-131221813	-	0.213359	0.00456533
CAMTA1-208	CAMTA1	ENST00000473578.5_1	chr1:6845540-6932098	+	0.213699	0.00272769
DMTN-202	DMTN	ENST00000358242.5_2	chr8:21916686-21940035	+	0.213798	0.0391777
YWHAQ-202	YWHAQ	ENST00000381844.8_1	chr2:9724101-9770745	-	0.214094	0.00594138
ADIPOR1-201	ADIPOR1	ENST00000340990.9_1	chr1:202909951-202927517	-	0.21415	0.0250026
RPLP0-219	RPLP0	ENST00000551150.5_1	chr12:120634502-120638902	-	0.214586	0.0378445
NUMB-212	NUMB	ENST00000554546.5_1	chr14:73741815-73925323	-	0.214654	0.00275071
SELENOT-202	SELENOT	ENST00000471696.5_2	chr3:150321075-150348222	+	0.214889	0.000341935
KLHDC1-201	KLHDC1	ENST00000359332.6_1	chr14:50159823-50219870	+	0.215113	0.000507655
HPCAL1-201	HPCAL1	ENST00000307845.7_1	chr2:10443033-10567735	+	0.21524	0.0194905
ACER2-201	ACER2	ENST00000340967.2_1	chr9:19409057-19452018	+	0.215294	0.00595843
TAPBP-234	TAPBP	ENST00000434618.6_1	chr6:33267471-33282164	-	0.2154	0.0151789
MSANTD3-203	MSANTD3	ENST00000395067.6_1	chr9:103189438-103213511	+	0.21547	0.0217679
PIK3C3-216	PIK3C3	ENST00000597477.5_3	chr18:39613806-39629647	+	0.216108	0.00732307
FOXP1-202	FOXP1	ENST00000318789.8_1	chr3:71003844-71633140	-	0.216118	0.00071861
LTA4H-201	LTA4H	ENST00000228740.6_1	chr12:96394606-96429439	-	0.216544	0.0278184
CCNY-203	CCNY	ENST00000374704.7_1	chr10:35625802-35860852	+	0.216549	0.0369457
PICALM-203	PICALM	ENST00000525162.5_1	chr11:85723386-85780581	-	0.217172	0.0252076
DNAJB6-204	DNAJB6	ENST00000429029.6_1	chr7:157129660-157179018	+	0.217338	0.0302061
PRKAR1B-202	PRKAR1B	ENST00000400758.6_1	chr7:589907-642320	-	0.217608	0.0238323
LIPA-202	LIPA	ENST00000336233.9_1	chr10:90973326-91011815	-	0.217723	0.0108919
SNX1-201	SNX1	ENST00000261889.9_1	chr15:64388192-64432074	+	0.217995	0.00402355
LTBP1-203	LTBP1	ENST00000404816.6_1	chr2:33172039-33624426	+	0.218025	0.00556983
RPS27L-205	RPS27L	ENST00000462430.5_1	chr15:63446052-63448973	-	0.21837	0.0043786
ARF3-201	ARF3	ENST00000256682.8_1	chr12:49329506-49351334	-	0.218486	0.000379137
MMD-201	MMD	ENST00000262065.7_1	chr17:53469974-53499353	-	0.218521	0.00241324
CMPK1-203	CMPK1	ENST00000371873.9_1	chr1:47799469-47844511	+	0.21914	0.000806698
PSME1-202	PSME1	ENST00000382708.7_1	chr14:24605409-24608173	+	0.219493	0.0270791
BMP6-201	BMP6	ENST00000283147.6_1	chr6:7727030-7881655	+	0.219522	0.0357734
ZNF185-202	ZNF185	ENST00000318529.12_1	chrX:152086409-152142024	+	0.219681	0.0309333
COPB1-201	COPB1	ENST00000249923.7_1	chr11:14479052-14521398	-	0.219825	0.00574662
ASAP2-201	ASAP2	ENST00000281419.7_1	chr2:9346894-9545807	+	0.220098	0.00546221
PDK3-202	PDK3	ENST00000441463.2_1	chrX:24483573-24557954	+	0.220241	0.0252379
HLA-DRA-202	HLA-DRA	ENST00000395388.6_1	chr6:32407619-32412823	+	0.220318	0.045647
RARS-201	RARS	ENST00000231572.7_1	chr5:167913450-167946304	+	0.220515	0.00448097
MGEA5-203	MGEA5	ENST00000370094.7_1	chr10:103556803-103578175	-	0.220525	0.0294623
SYTL4-204	SYTL4	ENST00000372989.5_1	chrX:99929488-99986498	-	0.220694	0.000916724
TBXA2R-201	TBXA2R	ENST00000375190.8_1	chr19:3594504-3606838	-	0.220742	0.00936533
PDCD4-203	PDCD4	ENST00000444997.1_2	chr10:112631713-112647602	+	0.220845	0.00286854
MAP2K3-202	MAP2K3	ENST00000342679.8_1	chr17:21187984-21218552	+	0.220997	0.0259328
SCLT1-201	SCLT1	ENST00000281142.9_3	chr4:129805148-130014762	-	0.221194	0.0460933
IRAK3-201	IRAK3	ENST00000261233.8_1	chr12:66582659-66648402	+	0.221288	0.00337144
MYLK-204	MYLK	ENST00000360304.7_2	chr3:123331145-123595465	-	0.221309	0.00475027
PTTG1IP-201	PTTG1IP	ENST00000330938.7_1	chr21:46269500-46293752	-	0.221382	0.00984363
MYL9-201	MYL9	ENST00000279022.6_1	chr20:35169887-35179850	+	0.221576	0.00389889
GPX4-213	GPX4	ENST00000622390.4_1	chr19:1104649-1106786	+	0.221896	0.0121907
PDLIM1-201	PDLIM1	ENST00000329399.6_1	chr10:96997329-97050781	-	0.222152	0.0142445
CD226-202	CD226	ENST00000577287.5_1	chr18:67531351-67614655	-	0.222318	0.00589389
TRAM1-201	TRAM1	ENST00000262213.6_1	chr8:71485677-71520604	-	0.222469	0.0491223
CD47-201	CD47	ENST00000355354.11_1	chr3:107762146-107809872	-	0.222573	0.00331009
GUCY1A3-201	GUCY1A3	ENST00000296518.11_1	chr4:156588350-156653501	+	0.222594	0.0112269
CSNK1G3-201	CSNK1G3	ENST00000345990.8_2	chr5:122847793-122952734	+	0.222744	0.00544852
CHD9-217	CHD9	ENST00000565832.5_3	chr16:53133072-53256667	+	0.222948	0.00217151
CALM1-201	CALM1	ENST00000356978.8_1	chr14:90863327-90874605	+	0.222994	0.0286959
CD74-203	CD74	ENST00000377795.7_1	chr5:149781200-149792332	-	0.223078	0.0245809
LIN7C-201	LIN7C	ENST00000278193.6_1	chr11:27516123-27528320	-	0.223185	0.00278393
INSIG1-201	INSIG1	ENST00000340368.8_1	chr7:155089486-155101945	+	0.223219	0.00179645
HIST1H2BB-201	HIST1H2BB	ENST00000615966.1_2	chr6:26043505-26043885	-	0.223591	0.0294014
ACTG1-202	ACTG1	ENST00000570382.1_1	chr17:79478545-79479825	-	0.223866	0.0287572
STK39-201	STK39	ENST00000355999.4_1	chr2:168810530-169104651	-	0.223897	0.00854188
TMEM183A-201	TMEM183A	ENST00000367242.3_1	chr1:202976514-202993976	+	0.22396	0.00136611
BLOC1S6-201	BLOC1S6	ENST00000220531.7_1	chr15:45879321-45901909	+	0.22445	0.00387211
MTHFD2-201	MTHFD2	ENST00000394053.6_1	chr2:74425689-74444692	+	0.224451	0.000626609
RBL1-202	RBL1	ENST00000373664.7_1	chr20:35624752-35724398	-	0.224672	0.00100354
IKZF3-203	IKZF3	ENST00000346872.7_2	chr17:37913968-38020441	-	0.224872	0.00816422
TXN-202	TXN	ENST00000374517.5_1	chr9:113006091-113018920	-	0.225001	0.0387984
DENND4A-202	DENND4A	ENST00000443035.7_1	chr15:65951461-66084462	-	0.225109	0.000503364
ARHGAP10-201	ARHGAP10	ENST00000336498.7_1	chr4:148653214-148993931	+	0.22516	0.0225472
MBNL3-206	MBNL3	ENST00000394311.6_1	chrX:131503345-131547636	-	0.225293	0.00661062
SPPL3-201	SPPL3	ENST00000353487.6_1	chr12:121200313-121342174	-	0.225345	0.00113182
HPRT1-201	HPRT1	ENST00000298556.7_1	chrX:133594183-133634698	+	0.225374	0.000958409
PFDN5-203	PFDN5	ENST00000351500.7_1	chr12:53689309-53693234	+	0.225505	0.00358633
HIST2H2AC-201	HIST2H2AC	ENST00000331380.3_1	chr1:149858525-149858914	+	0.225872	0.029714
URI1-211	URI1	ENST00000575242.1_2	chr19:30499987-30503806	+	0.226529	0.0125198
FBXO7-202	FBXO7	ENST00000397426.5_1	chr22:32871244-32894816	+	0.226571	0.026856
GAS2L1-208	GAS2L1	ENST00000616432.4_2	chr22:29702572-29708774	+	0.226749	0.0374089
FLNA-203	FLNA	ENST00000369850.7_1	chrX:153577016-153602994	-	0.226853	0.011859
VDAC3-201	VDAC3	ENST00000022615.8_1	chr8:42249421-42263415	+	0.226942	0.0185672
XK-201	XK	ENST00000378616.3_1	chrX:37545012-37591383	+	0.227514	0.0358626
HADHA-201	HADHA	ENST00000380649.7_1	chr2:26413504-26467594	-	0.228005	0.0104139
BCL2L1-205	BCL2L1	ENST00000422920.1_1	chr20:30309458-30310901	-	0.228053	0.02289
ELK3-201	ELK3	ENST00000228741.7_1	chr12:96588160-96663613	+	0.228082	0.0056057
SNX2-213	SNX2	ENST00000514949.1_1	chr5:122110898-122165450	+	0.228159	0.00184547
CLEC2D-203	CLEC2D	ENST00000290855.10_1	chr12:9822309-9852151	+	0.228642	0.00617559
SLC40A1-201	SLC40A1	ENST00000261024.6_1	chr2:190425305-190445613	-	0.228684	0.0250635
ELOVL7-204	ELOVL7	ENST00000507047.5_3	chr5:60060057-60140096	-	0.229102	0.0260081
PAXX-201	PAXX	ENST00000371620.3_1	chr9:139886870-139888428	+	0.229326	0.0071958
TTC27-201	TTC27	ENST00000317907.8_1	chr2:32853129-33046118	+	0.229366	0.00339966
RAP1GDS1-205	RAP1GDS1	ENST00000408927.7_1	chr4:99182604-99365012	+	0.229474	0.000665441
LZIC-202	LZIC	ENST00000377223.5_1	chr1:9988997-10003387	-	0.229513	0.00471459
NDUFB7-201	NDUFB7	ENST00000215565.2_1	chr19:14676890-14682874	-	0.229571	0.00930248
TUBB6-213	TUBB6	ENST00000591909.5_1	chr18:12308233-12329825	+	0.229583	0.00406969
FRG1-201	FRG1	ENST00000226798.8_1	chr4:190861943-190884359	+	0.229602	0.0034322
BARD1-201	BARD1	ENST00000260947.8_1	chr2:215590370-215674428	-	0.2298	0.00249493
GM2A-201	GM2A	ENST00000357164.3_1	chr5:150632453-150650001	+	0.229972	0.00168828
NEK7-202	NEK7	ENST00000367385.8_1	chr1:198126093-198291550	+	0.229973	0.00256563
TC2N-202	TC2N	ENST00000360594.9_1	chr14:92247299-92302791	-	0.230079	0.00892385
ARHGAP15-201	ARHGAP15	ENST00000295095.10_1	chr2:143886883-144525921	+	0.230184	0.0230418
KLF3-201	KLF3	ENST00000261438.9_1	chr4:38665817-38702663	+	0.230527	0.0132137
SYK-201	SYK	ENST00000375746.1_1	chr9:93589770-93660831	+	0.230543	0.0066431
ANO6-202	ANO6	ENST00000423947.7_1	chr12:45609868-45825565	+	0.230627	0.0169084
FUT8-207	FUT8	ENST00000554610.1_2	chr14:65879740-66028415	+	0.230639	0.00712317
TMEM140-201	TMEM140	ENST00000275767.3_1	chr7:134832824-134850967	+	0.231015	0.0163569
CD99-204	CD99	ENST00000381187.8_1	chrX:2609317-2659142	+	0.231087	0.0258917
MGLL-203	MGLL	ENST00000398104.5_1	chr3:127407905-127542093	-	0.231294	0.0165804
F13A1-201	F13A1	ENST00000264870.7_1	chr6:6144318-6321067	-	0.231311	0.00282596
EXOSC1-204	EXOSC1	ENST00000370902.7_1	chr10:99195899-99205774	-	0.231912	0.00878941
C2orf88-201	C2orf88	ENST00000340623.4_1	chr2:191045589-191068210	+	0.231944	0.0150971
PDGFC-203	PDGFC	ENST00000502773.5_1	chr4:157681606-157892546	-	0.232049	0.000643093
RPL22-202	RPL22	ENST00000462296.5_1	chr1:6252987-6263554	-	0.232201	0.00773096
HLA-DQA2-210	HLA-DQA2	ENST00000374940.3_1	chr6:32709119-32714992	+	0.232812	0.0125447
RPS11-205	RPS11	ENST00000599561.1_1	chr19:49999711-50002946	+	0.232875	0.0244778
TOMM6-201	TOMM6	ENST00000398881.3_1	chr6:41755403-41757634	+	0.232884	0.0409944
PLEKHG1-201	PLEKHG1	ENST00000358517.6_1	chr6:151042224-151164801	+	0.23335	0.000263956
AC015987.2-201	AC015987.2	ENST00000416501.1	chr7:135611542-135613214	+	0.233989	0.0421126
CDK9-201	CDK9	ENST00000373264.4_1	chr9:130548328-130553066	+	0.233998	0.00667559
PHF10-205	PHF10	ENST00000612128.1_1	chr6:170107124-170124101	-	0.234328	0.000267993
ATP5I-201	ATP5I	ENST00000304312.4_1	chr4:666225-668127	-	0.234448	0.0408796
HMGN4-201	HMGN4	ENST00000377575.2_1	chr6:26538633-26546482	+	0.234628	0.0151422
CD63-201	CD63	ENST00000257857.8_1	chr12:56119271-56123004	-	0.234776	0.0371489
CARD16-201	CARD16	ENST00000375704.7_4	chr11:104912250-104916103	-	0.234858	0.0310524
GZMH-201	GZMH	ENST00000216338.8_1	chr14:25075686-25078864	-	0.235261	0.021667
UBE3A-212	UBE3A	ENST00000626589.2_2	chr15:25650646-25665880	-	0.235537	0.03063
GTF2A2-202	GTF2A2	ENST00000396060.6_1	chr15:59930261-59949737	-	0.235677	0.00292903
CERS2-205	CERS2	ENST00000368954.9_1	chr1:150937649-150947480	-	0.235758	0.0186654
BNIP3L-201	BNIP3L	ENST00000380629.6_1	chr8:26240414-26270645	+	0.235764	0.0238745
ETS1-201	ETS1	ENST00000319397.6_1	chr11:128331661-128392199	-	0.236022	0.0371352
DPYSL2-201	DPYSL2	ENST00000311151.9_3	chr8:26435359-26515694	+	0.236132	0.0244201
RABGAP1L-201	RABGAP1L	ENST00000251507.8_1	chr1:174128655-174927319	+	0.236497	0.00687759
LAMTOR1-208	LAMTOR1	ENST00000545249.5_1	chr11:71796941-71814292	-	0.236533	0.0179736
MAX-219	MAX	ENST00000618858.4_1	chr14:65541842-65569262	-	0.236534	0.0182301
PYGB-201	PYGB	ENST00000216962.8_1	chr20:25228705-25278650	+	0.236781	0.000789729
TAX1BP1-202	TAX1BP1	ENST00000396319.6_1	chr7:27779808-27868882	+	0.237192	0.0126719
TIA1-205	TIA1	ENST00000433529.6_1	chr2:70436576-70475773	-	0.237407	0.000639792
SOD2-210	SOD2	ENST00000537657.5_1	chr6:160105936-160166218	-	0.237417	0.0172577
ANXA4-201	ANXA4	ENST00000394295.5_1	chr2:69969106-70054232	+	0.237574	0.00292968
TIPRL-202	TIPRL	ENST00000367833.6_1	chr1:168148171-168171352	+	0.238284	0.00312366
G6PD-211	G6PD	ENST00000621232.4_1	chrX:153759606-153775469	-	0.238381	0.00801557
ARF5-201	ARF5	ENST00000000233.9_1	chr7:127228399-127231759	+	0.238481	0.0482307
UBP1-202	UBP1	ENST00000283629.7_1	chr3:33429828-33481870	-	0.23875	0.000390939
UBE2F-201	UBE2F	ENST00000272930.8_3	chr2:238875597-238951236	+	0.238774	0.0220545
GSN-207	GSN	ENST00000432226.5_3	chr9:124030338-124079390	+	0.239551	0.0281768
SERINC3-202	SERINC3	ENST00000342374.4_1	chr20:43126072-43150750	-	0.239628	0.00112514
VPS28-216	VPS28	ENST00000533806.5_3	chr8:145649247-145653931	-	0.23964	0.0149092
RNF10-203	RNF10	ENST00000413266.6_2	chr12:120972615-121014689	+	0.240221	0.00179268
GLG1-201	GLG1	ENST00000205061.9_2	chr16:74481325-74641012	-	0.240399	0.000375298
ANKRD33B-201	ANKRD33B	ENST00000296657.6_1	chr5:10564580-10657928	+	0.240528	0.000325678
EIF2S3-201	EIF2S3	ENST00000253039.8_1	chrX:24072833-24096088	+	0.240712	0.0255097
UXS1-201	UXS1	ENST00000283148.11_1	chr2:106709759-106810795	-	0.240997	0.0109199
ARHGDIB-206	ARHGDIB	ENST00000541546.5_1	chr12:15095442-15114539	-	0.241	0.00773614
CSH1-201	CSH1	ENST00000316193.12_1	chr17:61972278-61974013	-	0.241379	0.0140333
HIST2H2BE-201	HIST2H2BE	ENST00000369155.3_1	chr1:149856009-149858202	-	0.2418	0.0385861
CD99-206	CD99	ENST00000449611.6_1	chrX:2609541-2644414	+	0.242122	0.0130217
BAG1-202	BAG1	ENST00000379704.7_3	chr9:33255024-33264569	-	0.242259	0.0244086
CNST-203	CNST	ENST00000366513.8_3	chr1:246729748-246831886	+	0.242446	0.0184351
FUBP1-203	FUBP1	ENST00000370768.6_1	chr1:78414090-78444770	-	0.242516	0.00961258
HIST1H4H-204	HIST1H4H	ENST00000635491.1_1	chr6:26281283-26285762	-	0.242542	0.0370915
WWP1-202	WWP1	ENST00000517970.5_1	chr8:87354967-87480732	+	0.242612	0.0060616
C2orf88-205	C2orf88	ENST00000443551.2_1	chr2:191045681-191064940	+	0.242823	0.00403217
CERS2-213	CERS2	ENST00000560793.6_1	chr1:150937649-150940201	-	0.243156	0.0400024
CYB5R3-206	CYB5R3	ENST00000438270.1_3	chr22:43023647-43043076	-	0.243734	0.0203034
NAP1L1-205	NAP1L1	ENST00000542344.5_1	chr12:76441810-76478515	-	0.24431	0.016343
PABPC1-216	PABPC1	ENST00000520868.5_1	chr8:101715144-101719159	-	0.244553	0.031745
IGLL5-203	IGLL5	ENST00000532223.2_1	chr22:23229960-23238287	+	0.244727	0.00197557
NUDT3-201	NUDT3	ENST00000607016.1_1	chr6:34247456-34360451	-	0.245051	0.000404367
GABPA-201	GABPA	ENST00000354828.7_1	chr21:27106881-27144771	+	0.245819	0.00144786
UXT-202	UXT	ENST00000335890.2_1	chrX:47511204-47518516	-	0.246057	0.00778177
PRUNE1-204	PRUNE1	ENST00000368936.5_1	chr1:150980959-151008189	+	0.246059	0.0316144
RAB31-207	RAB31	ENST00000578921.5_1	chr18:9708162-9862548	+	0.24611	1.76e-05
ABHD4-203	ABHD4	ENST00000428304.6_1	chr14:23067146-23082121	+	0.246233	0.00400156
DDX17-212	DDX17	ENST00000640668.1_1	chr22:38881940-38902242	-	0.246398	0.0474737
PRKAR1A-201	PRKAR1A	ENST00000358598.6_1	chr17:66508173-66528903	+	0.246411	0.0138289
MAP3K5-201	MAP3K5	ENST00000359015.4_1	chr6:136878185-137113656	-	0.246787	0.0485143
ANP32E-208	ANP32E	ENST00000583931.5_3	chr1:150190717-150208504	-	0.246976	0.0160348
STMN1-206	STMN1	ENST00000455785.6_1	chr1:26226593-26232957	-	0.246991	0.0233888
BICD2-202	BICD2	ENST00000375512.3_1	chr9:95473645-95527094	-	0.247081	0.0132153
SKA2-201	SKA2	ENST00000330137.11_1	chr17:57187312-57232630	-	0.24746	0.0119462
TFAM-204	TFAM	ENST00000487519.5_1	chr10:60144782-60158981	+	0.247566	1.9e-05
INF2-203	INF2	ENST00000392634.8_1	chr14:105155974-105185940	+	0.247799	0.0135816
RAB37-202	RAB37	ENST00000392610.5_1	chr17:72733371-72743474	+	0.248191	0.00529173
XRCC1-201	XRCC1	ENST00000262887.9_1	chr19:44047192-44080158	-	0.248991	0.000384416
JAZF1-201	JAZF1	ENST00000283928.9_1	chr7:27870192-28220362	-	0.249092	0.000912445
CSTA-201	CSTA	ENST00000264474.3_1	chr3:122044091-122060819	+	0.249303	0.011561
MTFR1L-203	MTFR1L	ENST00000374303.6_1	chr1:26146397-26159432	+	0.249399	0.024542
TNFAIP8-207	TNFAIP8	ENST00000513374.1_1	chr5:118668870-118729438	+	0.249451	0.0196773
CTBP1-204	CTBP1	ENST00000503594.5_1	chr4:1205473-1208250	-	0.2495	0.00712027
ATP2A3-202	ATP2A3	ENST00000352011.7_1	chr17:3828585-3867640	-	0.249518	0.0144851
LUC7L2-202	LUC7L2	ENST00000354926.8_1	chr7:139044654-139108198	+	0.250065	0.0245546
CCDC175-202	CCDC175	ENST00000537690.6_1	chr14:59971779-60043549	-	0.250071	0.00474862
CNBP-208	CNBP	ENST00000504813.5_1	chr3:128888412-128902765	-	0.250439	0.00889002
FERMT3-208	FERMT3	ENST00000545896.1_2	chr11:63987909-63991320	+	0.250524	0.0235624
EIF3L-203	EIF3L	ENST00000412331.6_1	chr22:38244875-38285414	+	0.250904	0.00618585
TST-201	TST	ENST00000249042.7_1	chr22:37406900-37415568	-	0.25102	0.00510189
TMBIM1-201	TMBIM1	ENST00000258412.7_1	chr2:219138915-219157300	-	0.251273	0.0445354
CA2-201	CA2	ENST00000285379.9_1	chr8:86376081-86393722	+	0.251286	0.0249904
SSX2IP-201	SSX2IP	ENST00000342203.7_1	chr1:85109390-85156228	-	0.251336	0.0152246
ZRSR2-201	ZRSR2	ENST00000307771.7_1	chrX:15808595-15841383	+	0.251548	0.00114749
HNRNPD-203	HNRNPD	ENST00000353341.8_1	chr4:83274982-83295139	-	0.251832	0.047505
BMI1-201	BMI1	ENST00000376663.7_1	chr10:22610140-22620413	+	0.252378	0.00554764
SLAIN2-201	SLAIN2	ENST00000264313.10_1	chr4:48343339-48428229	+	0.252404	0.00597924
SH3BGRL2-201	SH3BGRL2	ENST00000369838.5_1	chr6:80341000-80413376	+	0.252622	0.00473344
ZFAND3-202	ZFAND3	ENST00000373389.5_1	chr6:37897735-38110107	+	0.253006	0.00207831
FYB1-209	FYB1	ENST00000512982.2_1	chr5:39107404-39270759	-	0.253018	0.0146166
BBX-206	BBX	ENST00000415149.6_1	chr3:107241783-107530171	+	0.253204	0.000178234
NPC2-207	NPC2	ENST00000555619.5_1	chr14:74946636-74960215	-	0.253211	0.0306216
CTNNBL1-204	CTNNBL1	ENST00000405275.6_1	chr20:36322357-36500530	+	0.253313	0.00266542
DLST-202	DLST	ENST00000334220.8_1	chr14:75348596-75370448	+	0.253599	0.00275346
WRB-201	WRB	ENST00000333781.9_1	chr21:40752170-40769815	+	0.253755	0.0497606
RPLP0-202	RPLP0	ENST00000313104.9_1	chr12:120634505-120638910	-	0.253793	0.0223246
ERH-203	ERH	ENST00000557016.5_1	chr14:69846840-69865344	-	0.254065	0.0293021
SH3BGRL-201	SH3BGRL	ENST00000373212.5_1	chrX:80457442-80554046	+	0.254367	0.0139318
TPM3-206	TPM3	ENST00000330188.13_3	chr1:154128840-154155681	-	0.254406	0.0295107
PSMD6-201	PSMD6	ENST00000295901.8_1	chr3:63996225-64009236	-	0.254472	0.00764322
GP1BA-201	GP1BA	ENST00000329125.5_1	chr17:4835592-4838325	+	0.254765	0.0292252
TPP1-215	TPP1	ENST00000533371.5_1	chr11:6634003-6640585	-	0.255304	0.019408
AMD1-204	AMD1	ENST00000368885.7_1	chr6:111195973-111216916	+	0.255392	0.0193176
SEPT11-203	2019-09-11	ENST00000502584.5_1	chr4:77870904-77953311	+	0.255408	0.0410152
GSR-201	GSR	ENST00000221130.9_2	chr8:30535578-30585443	-	0.255856	0.0217971
ARHGAP30-201	ARHGAP30	ENST00000368013.7_1	chr1:161016738-161039735	-	0.256155	0.0453738
ZCCHC7-209	ZCCHC7	ENST00000534928.5_1	chr9:37120595-37358143	+	0.256192	0.0162325
GRB2-202	GRB2	ENST00000316804.9_1	chr17:73314157-73401734	-	0.256463	0.0484311
TROVE2-208	TROVE2	ENST00000432079.5_1	chr1:193028584-193060349	+	0.256774	0.00324233
MRPS10-201	MRPS10	ENST00000053468.3_1	chr6:42174539-42185603	-	0.257455	0.0102478
LIMD2-206	LIMD2	ENST00000578993.5_1	chr17:61775695-61777462	-	0.257834	0.0422631
HSPA8-201	HSPA8	ENST00000227378.7_1	chr11:122928205-122932040	-	0.258168	0.040151
PPP1CB-203	PPP1CB	ENST00000395366.2_1	chr2:28974719-29025806	+	0.258613	0.00337166
PRKCA-202	PRKCA	ENST00000413366.7_1	chr17:64298944-64806861	+	0.258694	8.06e-05
ZDHHC21-201	ZDHHC21	ENST00000380916.8_1	chr9:14611069-14693469	-	0.258737	1.66e-06
RMND5A-201	RMND5A	ENST00000283632.4_1	chr2:86947296-87005164	+	0.258854	0.00608631
MDH2-201	MDH2	ENST00000315758.9_1	chr7:75677385-75696826	+	0.258977	0.00684637
UBL4A-202	UBL4A	ENST00000369660.8_1	chrX:153712056-153715009	-	0.259217	0.0248605
XPO7-201	XPO7	ENST00000252512.13_1	chr8:21777182-21864096	+	0.259528	0.0133592
TIMP1-203	TIMP1	ENST00000441738.1_1	chrX:47441908-47444653	+	0.259669	0.0246173
SMAD2-208	SMAD2	ENST00000587269.5_1	chr18:45394697-45456970	-	0.259828	0.000875753
FUS-202	FUS	ENST00000380244.7_1	chr16:31191460-31202923	+	0.259857	0.0151934
MICU1-202	MICU1	ENST00000398761.8_1	chr10:74127085-74385949	-	0.259866	0.0323599
OSTC-201	OSTC	ENST00000361564.8_1	chr4:109571740-109588976	+	0.260136	0.00755199
UQCRB-204	UQCRB	ENST00000518406.5_1	chr8:97243170-97247767	-	0.260156	0.01319
RAB32-201	RAB32	ENST00000367495.3_1	chr6:146864829-146876101	+	0.26029	0.0243536
VIRMA-201	VIRMA	ENST00000297591.9_1	chr8:95499921-95565751	-	0.260291	0.000105018
PATL1-201	PATL1	ENST00000300146.9_1	chr11:59404189-59436453	-	0.26033	0.00448919
HSD17B10-201	HSD17B10	ENST00000168216.10_1	chrX:53458206-53461320	-	0.260412	0.00365523
DNAJC8-201	DNAJC8	ENST00000263697.5_1	chr1:28526789-28559536	-	0.260596	0.0277153
HNRNPC-203	HNRNPC	ENST00000430246.6_1	chr14:21678715-21733675	-	0.260745	0.00396592
PLEKHG1-202	PLEKHG1	ENST00000367326.1_1	chr6:150921019-151054957	+	0.260782	0.0101289
SEMA4D-223	SEMA4D	ENST00000540475.5_1	chr9:92017840-92094805	-	0.260846	0.0191822
S100A12-201	S100A12	ENST00000368737.4_1	chr1:153346182-153348125	-	0.260941	0.0491408
MKRN1-202	MKRN1	ENST00000443720.6_3	chr7:140155992-140179299	-	0.261198	0.0364884
RPS3-214	RPS3	ENST00000530164.5_1	chr11:75110563-75114989	+	0.261199	0.00653261
PRELID2-202	PRELID2	ENST00000394450.6_1	chr5:145139819-145214899	-	0.261271	0.00830284
IL2RG-203	IL2RG	ENST00000374202.6_1	chrX:70327254-70331481	-	0.261338	0.0081446
TMEM55A-201	TMEM55A	ENST00000285419.7_2	chr8:92006024-92053292	-	0.261512	0.0334441
WDR44-201	WDR44	ENST00000254029.7_2	chrX:117480072-117583924	+	0.261998	0.0453534
MBNL3-204	MBNL3	ENST00000370853.7_1	chrX:131512177-131573718	-	0.262085	0.0420243
MYL6-215	MYL6	ENST00000549566.5_1	chr12:56552142-56555249	+	0.262087	0.0319664
PRKAR2B-201	PRKAR2B	ENST00000265717.4_1	chr7:106685094-106802256	+	0.262294	0.0230589
DHRS3-204	DHRS3	ENST00000616661.4_1	chr1:12627939-12677737	-	0.262621	0.0113531
CTSW-201	CTSW	ENST00000307886.7_1	chr11:65647280-65651212	+	0.263148	0.032805
EIF4G3-202	EIF4G3	ENST00000356916.7_1	chr1:21267735-21501230	-	0.263295	0.000940232
RPL23-204	RPL23	ENST00000394333.5_1	chr17:37004118-37009988	-	0.263337	0.0256619
CEP162-202	CEP162	ENST00000403245.7_1	chr6:84833960-84937353	-	0.2634	0.00328684
TWF2-201	TWF2	ENST00000305533.9_1	chr3:52262626-52273276	-	0.263441	0.00647947
HIST1H2BF-001	HIST1H2BF	ENST00000359985.1	chr6:26199748-26200942	+	0.263717	0.0300136
RNPEPL1-201	RNPEPL1	ENST00000270357.9_2	chr2:241508004-241520789	+	0.263852	0.000772418
NLK-201	NLK	ENST00000407008.7_1	chr17:26369182-26523407	+	0.263862	0.0382928
KIFAP3-202	KIFAP3	ENST00000367765.5_1	chr1:169890467-170038058	-	0.263996	0.013808
BLK-201	BLK	ENST00000259089.8_1	chr8:11351510-11422113	+	0.264204	0.0227993
MRPS27-201	MRPS27	ENST00000261413.9_1	chr5:71515236-71616088	-	0.264292	0.00136852
RAB27B-201	RAB27B	ENST00000262094.9_1	chr18:52495430-52562747	+	0.264329	0.00302613
PARVB-201	PARVB	ENST00000338758.11_1	chr22:44420157-44568829	+	0.264398	0.00446934
PKM-220	PKM	ENST00000568459.5_3	chr15:72491970-72522063	-	0.264797	0.0436511
UBA2-201	UBA2	ENST00000246548.8_1	chr19:34919268-34962156	+	0.264846	0.000358828
MGA-204	MGA	ENST00000563576.5_1	chr15:41913734-42005680	+	0.265106	0.00263488
RAD23B-202	RAD23B	ENST00000416373.6_1	chr9:110046334-110094473	+	0.26513	0.0143027
ANAPC5-218	ANAPC5	ENST00000541887.5_2	chr12:121746160-121790191	-	0.265156	0.00807646
BTN3A1-202	BTN3A1	ENST00000289361.10_2	chr6:26402465-26415444	+	0.265266	0.00228477
SEC62-201	SEC62	ENST00000337002.8_1	chr3:169684553-169716161	+	0.265344	0.00312583
VAMP7-202	VAMP7	ENST00000286448.11_1	chrX:155110956-155173433	+	0.265367	0.0306786
TPM4-201	TPM4	ENST00000300933.8_3	chr19:16187116-16213815	+	0.265855	0.0194293
FAM210B-201	FAM210B	ENST00000371384.3_1	chr20:54933971-54943719	+	0.26594	0.0186501
PPM1L-204	PPM1L	ENST00000497343.5_1	chr3:160473390-160740250	+	0.266029	0.00227281
IMP3-202	IMP3	ENST00000403490.2_1	chr15:75931428-75932664	-	0.266154	0.0177831
ADIPOR2-201	ADIPOR2	ENST00000357103.4_1	chr12:1800193-1897844	+	0.266192	0.0152384
CIAO1-203	CIAO1	ENST00000488633.1_1	chr2:96931870-96937383	+	0.266211	0.0125199
CCT7-201	CCT7	ENST00000258091.9_1	chr2:73461366-73480132	+	0.266265	0.0233552
ZFAND2B-201	ZFAND2B	ENST00000289528.9_2	chr2:220071515-220074373	+	0.266409	0.0124526
PPM1A-203	PPM1A	ENST00000395076.8_1	chr14:60715986-60765805	+	0.266428	0.0124259
ACTB-202	ACTB	ENST00000414620.1_1	chr7:5568913-5602421	-	0.266461	0.0321655
BROX-201	BROX	ENST00000340934.9_1	chr1:222885895-222908538	+	0.266533	0.00784574
VPS8-201	VPS8	ENST00000287546.8_1	chr3:184529931-184770402	+	0.266704	0.025688
RETREG2-203	RETREG2	ENST00000430297.6_2	chr2:220042939-220050201	+	0.266887	0.00317753
HMG20B-202	HMG20B	ENST00000333651.10_1	chr19:3572936-3579086	+	0.26705	0.0393218
EIF4EBP2-201	EIF4EBP2	ENST00000373218.4_1	chr10:72164135-72188374	+	0.267738	0.0076459
UBE2M-201	UBE2M	ENST00000253023.7_1	chr19:59067079-59070327	-	0.267842	0.0144425
LEPR-202	LEPR	ENST00000349533.10_1	chr1:65886335-66107242	+	0.268086	0.00464307
PGK1-201	PGK1	ENST00000373316.4_1	chrX:77359671-77384793	+	0.268573	0.00758481
MCM6-201	MCM6	ENST00000264156.2_1	chr2:136597196-136633996	-	0.26859	0.00618794
SPTSSA-201	SPTSSA	ENST00000298130.4_1	chr14:34901995-34931562	-	0.26871	0.00936151
LTBP1-204	LTBP1	ENST00000407925.5_1	chr2:33359724-33624430	+	0.268882	0.0297346
CNOT8-201	CNOT8	ENST00000285896.10_1	chr5:154238106-154256353	+	0.269058	0.0107333
NCOA4-205	NCOA4	ENST00000583565.5_2	chr10:51576285-51589527	+	0.269345	0.0255217
FGD2-201	FGD2	ENST00000274963.12_1	chr6:36973423-36996846	+	0.269996	0.00267994
EPS15-203	EPS15	ENST00000371733.7_1	chr1:51819935-51985000	-	0.270203	0.0172919
CCDC97-201	CCDC97	ENST00000269967.3_1	chr19:41816094-41830788	+	0.270552	0.0205677
GP6-203	GP6	ENST00000417454.5_1	chr19:55525073-55549632	-	0.270628	0.0236782
DDIT4-201	DDIT4	ENST00000307365.3_1	chr10:74033678-74035794	+	0.271332	0.0446837
CHMP2A-201	CHMP2A	ENST00000312547.6_1	chr19:59062933-59066491	-	0.271369	0.00936773
PDCD4-201	PDCD4	ENST00000280154.11_1	chr10:112631565-112659764	+	0.271774	0.0130326
DAZAP2-209	DAZAP2	ENST00000549732.6_1	chr12:51632638-51636378	+	0.271889	0.0181936
SSRP1-201	SSRP1	ENST00000278412.6_1	chr11:57093459-57103351	-	0.271952	0.00570392
PCMTD1-207	PCMTD1	ENST00000522514.5_1	chr8:52732900-52811596	-	0.272374	0.0458668
DNAJA1-201	DNAJA1	ENST00000330899.4_1	chr9:33025209-33039905	+	0.272825	0.0191372
SMDT1-201	SMDT1	ENST00000331479.3_1	chr22:42475699-42480288	+	0.272906	0.000709585
RAB37-203	RAB37	ENST00000392612.7_1	chr17:72733369-72743474	+	0.273078	0.0261616
TUBA8-204	TUBA8	ENST00000426208.5_2	chr22:18593097-18607035	+	0.273276	0.0050512
DCAF12-201	DCAF12	ENST00000361264.8_1	chr9:34086385-34126771	-	0.273318	0.00604903
CPSF6-202	CPSF6	ENST00000435070.6_1	chr12:69633317-69668138	+	0.273596	0.000631265
SNX5-201	SNX5	ENST00000377759.8_1	chr20:17922241-17949363	-	0.273635	0.0147765
PRTFDC1-201	PRTFDC1	ENST00000320152.10_1	chr10:25137536-25241533	-	0.273647	0.00897914
CTSA-205	CTSA	ENST00000419493.2_1	chr20:44521391-44523771	+	0.27421	0.0145436
MYLK-220	MYLK	ENST00000578202.1_1	chr3:123332187-123339361	-	0.274269	0.000548647
TMED2-201	TMED2	ENST00000262225.7_1	chr12:124069078-124083124	+	0.274405	0.00461839
NUP160-201	NUP160	ENST00000378460.6_1	chr11:47799639-47870019	-	0.274552	0.000155958
ENSA-201	ENSA	ENST00000271690.12_1	chr1:150595757-150602053	-	0.274906	0.0122292
GNG11-201	GNG11	ENST00000248564.5_1	chr7:93551011-93557922	+	0.274938	0.0115988
SLC25A3-206	SLC25A3	ENST00000547534.5_1	chr12:98987464-98991851	+	0.27514	0.0184335
F11R-202	F11R	ENST00000368026.10_1	chr1:160965001-160991138	-	0.275185	0.0215931
KCTD20-202	KCTD20	ENST00000373731.6_1	chr6:36410544-36458920	+	0.275605	0.00397317
NCK2-201	NCK2	ENST00000233154.8_1	chr2:106361354-106510730	+	0.27565	0.00920534
EIF5-205	EIF5	ENST00000558506.1_1	chr14:103801286-103809565	+	0.275684	0.0074051
MIER1-203	MIER1	ENST00000357692.6_2	chr1:67390640-67453714	+	0.275745	0.0102255
RPL14-203	RPL14	ENST00000416518.1_1	chr3:40498845-40503771	+	0.275751	0.0281326
ITPR1-202	ITPR1	ENST00000354582.10_2	chr3:4535032-4889524	+	0.276049	0.00203351
SPART-203	SPART	ENST00000451493.5_1	chr13:36875777-36920934	-	0.276185	0.00408531
EMP3-201	EMP3	ENST00000270221.10_1	chr19:48828582-48833810	+	0.27628	0.0214707
ESAM-201	ESAM	ENST00000278927.9_1	chr11:124623019-124632180	-	0.276341	0.0140865
CHP1-201	CHP1	ENST00000334660.9_1	chr15:41523341-41574088	+	0.276464	0.00886251
AQP10-201	AQP10	ENST00000324978.7_1	chr1:154293592-154297801	+	0.276831	0.00805318
FUT8-214	FUT8	ENST00000557338.5_1	chr14:65879737-66028433	+	0.276978	0.0146428
FAM96B-201	FAM96B	ENST00000422424.6_1	chr16:66965958-66968303	-	0.277012	0.0197328
AKNA-204	AKNA	ENST00000374075.9_1	chr9:117098445-117139915	-	0.277071	0.0452981
GDI2-203	GDI2	ENST00000380191.8_1	chr10:5807186-5855512	-	0.277078	0.0330059
WASF3-202	WASF3	ENST00000361042.8_1	chr13:27131840-27263080	+	0.27722	0.00909053
RNF34-201	RNF34	ENST00000361234.9_1	chr12:121837844-121862154	+	0.277294	0.0115679
NDUFB8-201	NDUFB8	ENST00000299166.8_1	chr10:102283497-102289621	-	0.277482	0.0110843
PPP6R1-201	PPP6R1	ENST00000412770.6_2	chr19:55741148-55770363	-	0.277507	0.0155083
ALDH16A1-201	ALDH16A1	ENST00000293350.8_1	chr19:49956426-49974305	+	0.277724	0.00180194
GFI1B-207	GFI1B	ENST00000636137.1_1	chr9:135854038-135867037	+	0.277802	0.0258491
SLBP-206	SLBP	ENST00000489418.5_1	chr4:1694527-1714282	-	0.277866	0.024808
MRPS35-201	MRPS35	ENST00000081029.7_1	chr12:27863706-27909228	+	0.278134	0.00238055
FLNA-201	FLNA	ENST00000344736.8_1	chrX:153577152-153599656	-	0.27853	0.0286433
PDE5A-202	PDE5A	ENST00000354960.7_1	chr4:120415550-120550146	-	0.27855	0.00184895
CAPZA1-201	CAPZA1	ENST00000263168.3_1	chr1:113161795-113214241	+	0.278755	0.000438191
CD36-214	CD36	ENST00000447544.6_2	chr7:80267992-80306324	+	0.278764	0.0365617
PRPF19-201	PRPF19	ENST00000227524.8_1	chr11:60658202-60674060	-	0.278843	0.011886
DCTN4-203	DCTN4	ENST00000447998.6_1	chr5:150088002-150138671	-	0.279005	0.00125141
USP48-201	USP48	ENST00000308271.13_1	chr1:22005072-22110099	-	0.279056	0.00185496
KLHL5-201	KLHL5	ENST00000261425.7_2	chr4:39046659-39123829	+	0.279345	0.0285487
EIF4A2-201	EIF4A2	ENST00000323963.9_1	chr3:186501336-186507689	+	0.279364	0.00689193
GLA-201	GLA	ENST00000218516.3_1	chrX:100652791-100662913	-	0.279409	0.0157947
CD36-202	CD36	ENST00000394788.7_2	chr7:80267992-80303732	+	0.279753	0.0271737
CNOT10-201	CNOT10	ENST00000328834.9_1	chr3:32726637-32815367	+	0.279814	0.00186928
GLUD1-201	GLUD1	ENST00000277865.4_1	chr10:88810243-88854623	-	0.280504	0.00627701
RECQL-204	RECQL	ENST00000444129.6_1	chr12:21621845-21654527	-	0.280655	0.00286284
AC025262.1-201	AC025262.1	ENST00000594966.1	chr12:65090189-65090329	-	0.280682	0.0497991
TUBA1C-201	TUBA1C	ENST00000301072.10_1	chr12:49658690-49668386	+	0.280887	0.0347161
SENP7-207	SENP7	ENST00000394095.6_1	chr3:101043049-101232028	-	0.281057	0.00173062
E2F1-201	E2F1	ENST00000343380.5_1	chr20:32263489-32274210	-	0.281071	0.0174984
PPP3CB-202	PPP3CB	ENST00000360663.9_2	chr10:75196186-75255759	-	0.281195	0.0227394
GRAP2-201	GRAP2	ENST00000344138.8_1	chr22:40297086-40369725	+	0.281342	0.00322379
FYB1-205	FYB1	ENST00000506557.5_1	chr5:39202876-39219678	-	0.28135	0.0137895
ERP29-202	ERP29	ENST00000455836.1_1	chr12:112451152-112461024	+	0.281365	0.015584
ARHGAP6-205	ARHGAP6	ENST00000380736.5_1	chrX:11155663-11445893	-	0.2818	0.0157018
UBE2E1-204	UBE2E1	ENST00000442670.5_1	chr3:23848580-23930707	+	0.28265	0.0442966
TMED3-201	TMED3	ENST00000299705.9_1	chr15:79603404-79615189	+	0.282829	0.0116202
NBR1-206	NBR1	ENST00000590996.5_2	chr17:41323231-41362540	+	0.283289	0.0349091
TSC22D1-201	TSC22D1	ENST00000261489.6_3	chr13:45006279-45010981	-	0.283322	0.00544386
CDS2-203	CDS2	ENST00000460006.5_1	chr20:5107432-5178533	+	0.283473	0.00384044
RAB10-201	RAB10	ENST00000264710.4_1	chr2:26256979-26360323	+	0.283581	0.0340761
PRMT1-201	PRMT1	ENST00000391851.8_1	chr19:50180409-50191704	+	0.283681	0.0145422
NFYA-201	NFYA	ENST00000341376.10_1	chr6:41040684-41067715	+	0.283845	0.00429521
IFNGR1-201	IFNGR1	ENST00000367739.8_2	chr6:137518621-137540586	-	0.283936	0.0195282
SLFN14-201	SLFN14	ENST00000415846.3_1	chr17:33875144-33885117	-	0.284011	0.0285822
GSN-209	GSN	ENST00000449733.7_1	chr9:124030446-124095121	+	0.284017	0.0247811
SLC9A9-201	SLC9A9	ENST00000316549.10_1	chr3:142984064-143567373	-	0.284229	0.0274986
ARPC4-201	ARPC4	ENST00000397261.7_1	chr3:9834242-9849410	+	0.28426	0.0280884
CD37-206	CD37	ENST00000594743.1_1	chr19:49840472-49843284	+	0.284543	0.00247118
MFN2-201	MFN2	ENST00000235329.9_1	chr1:12040369-12073565	+	0.284663	0.0371412
PEAR1-202	PEAR1	ENST00000338302.7_1	chr1:156863512-156886221	+	0.284849	0.00573027
EMC2-201	EMC2	ENST00000220853.7_1	chr8:109455853-109499141	+	0.285138	0.0492024
SUCNR1-201	SUCNR1	ENST00000362032.6_1	chr3:151591431-151602407	+	0.285515	0.00425714
ANKRD13A-201	ANKRD13A	ENST00000261739.8_1	chr12:110437328-110477568	+	0.285878	0.00746787
SCFD2-202	SCFD2	ENST00000401642.7_1	chr4:53739149-54232242	-	0.285932	0.0396169
SPARC-201	SPARC	ENST00000231061.8_1	chr5:151040657-151066726	-	0.286288	0.00166836
AIDA-201	AIDA	ENST00000340020.10_1	chr1:222841355-222885866	-	0.286474	0.0201127
PRDX3-201	PRDX3	ENST00000298510.3_1	chr10:120927215-120938345	-	0.28679	0.0459975
PDCD10-218	PDCD10	ENST00000497056.6_2	chr3:167401700-167452718	-	0.287323	0.0438104
FAM122B-202	FAM122B	ENST00000343004.9_1	chrX:133903597-133931185	-	0.287429	0.0232279
FOXO4-202	FOXO4	ENST00000374259.7_1	chrX:70316047-70323385	+	0.288327	0.0404783
PAFAH1B2-204	PAFAH1B2	ENST00000527958.5_1	chr11:117014983-117041764	+	0.288399	0.00730216
NNT-202	NNT	ENST00000344920.8_1	chr5:43603229-43705334	+	0.288531	0.00684943
FHDC1-202	FHDC1	ENST00000511601.5_1	chr4:153857504-153900838	+	0.288572	0.00992213
H2AFY-202	H2AFY	ENST00000312469.8_1	chr5:134670100-134734901	-	0.288822	0.00383352
BAG6-254	BAG6	ENST00000456286.5_2	chr6:31615565-31619756	-	0.288866	0.0327564
DYNLL1-202	DYNLL1	ENST00000392508.2_1	chr12:120933894-120936294	+	0.288871	0.00581161
NDUFS4-201	NDUFS4	ENST00000296684.9_1	chr5:52856465-52979170	+	0.288897	0.0276607
TPD52L2-202	TPD52L2	ENST00000346249.8_1	chr20:62496643-62522898	+	0.288957	0.00869505
FUT8-208	FUT8	ENST00000554667.1_1	chr14:65955036-66028420	+	0.28908	0.0140845
INTS8-217	INTS8	ENST00000523731.5_1	chr8:95835527-95893974	+	0.289335	0.00949931
RAB11A-204	RAB11A	ENST00000565075.5_1	chr15:66161829-66180197	+	0.289391	0.00948816
RGS18-201	RGS18	ENST00000367460.3_1	chr1:192127587-192154945	+	0.289399	0.00917413
TBC1D15-217	TBC1D15	ENST00000550746.5_1	chr12:72233498-72321028	+	0.290072	0.00829085
EMB-201	EMB	ENST00000303221.9_1	chr5:49692026-49737201	-	0.290098	0.0229441
PDCL-201	PDCL	ENST00000259467.8_1	chr9:125580623-125590910	-	0.290146	0.000146826
VPS54-203	VPS54	ENST00000409558.8_1	chr2:64119280-64246206	-	0.290218	0.00338013
SEPT6-205	2019-09-06	ENST00000394610.5_1	chrX:118750911-118827333	-	0.290231	0.0238808
SLMAP-201	SLMAP	ENST00000295951.7_1	chr3:57741957-57914895	+	0.29039	0.00917671
HSPA9-201	HSPA9	ENST00000297185.7_1	chr5:137890571-137911133	-	0.290398	0.0103157
SEPT5-209	2019-09-05	ENST00000438754.6_1	chr22:19705981-19710842	+	0.290448	0.043553
TMEM9B-205	TMEM9B	ENST00000534025.5_1	chr11:8968841-8986320	-	0.290666	0.00163204
SH3BP5-202	SH3BP5	ENST00000383791.7_1	chr3:15296360-15374136	-	0.29087	0.012925
FAM13B-201	FAM13B	ENST00000033079.7_2	chr5:137273649-137368720	-	0.29102	0.0414608
ATP5O-201	ATP5O	ENST00000290299.6_1	chr21:35275757-35288284	-	0.291462	0.0217346
HMOX1-201	HMOX1	ENST00000216117.8_1	chr22:35776828-35790207	+	0.291738	0.0290623
UTP18-201	UTP18	ENST00000225298.11_1	chr17:49337889-49375294	+	0.292115	0.0214162
POLR2K-201	POLR2K	ENST00000353107.7_1	chr8:101162812-101166230	+	0.292476	0.0273168
HMGCS1-201	HMGCS1	ENST00000325110.10_1	chr5:43289497-43313595	-	0.292695	0.000668103
WDFY1-201	WDFY1	ENST00000233055.8_1	chr2:224740064-224810104	-	0.292837	0.00795536
OCIAD1-222	OCIAD1	ENST00000511102.5_1	chr4:48833101-48853962	+	0.293072	0.026563
RHBDD1-205	RHBDD1	ENST00000424132.1_1	chr2:227700297-227729813	+	0.293483	0.00864419
KCTD12-201	KCTD12	ENST00000377474.3_1	chr13:77454301-77460525	-	0.293862	0.0048257
C5orf30-201	C5orf30	ENST00000319933.6_1	chr5:102594403-102614361	+	0.293961	0.0011833
SERPINB6-202	SERPINB6	ENST00000380520.5_1	chr6:2948393-2961561	-	0.294109	0.00643332
MAP3K8-201	MAP3K8	ENST00000263056.5_1	chr10:30722866-30750761	+	0.294298	0.00619639
MAP2K5-201	MAP2K5	ENST00000178640.9_1	chr15:67835047-68099461	+	0.294332	0.000791752
VDAC2-203	VDAC2	ENST00000332211.10_2	chr10:76970509-76991206	+	0.294384	0.0479092
TTYH3-203	TTYH3	ENST00000403167.5_1	chr7:2687337-2704434	+	0.294836	0.0262845
U2AF1-201	U2AF1	ENST00000291552.8_1	chr21:44513066-44527697	-	0.295122	0.0114106
CCT8-201	CCT8	ENST00000286788.8_1	chr21:30428645-30446118	-	0.295438	0.0172542
ABHD17B-201	ABHD17B	ENST00000333421.6_1	chr9:74480068-74525658	-	0.295781	0.005393
TRIP4-201	TRIP4	ENST00000261884.7_1	chr15:64680003-64747502	+	0.295808	0.0105045
PCSK6-217	PCSK6	ENST00000618548.4_1	chr15:101844139-102029947	-	0.29588	0.024762
TTC37-201	TTC37	ENST00000358746.6_1	chr5:94799599-94890711	-	0.295977	0.010897
MEIS1-212	MEIS1	ENST00000495021.6_1	chr2:66666453-66799891	+	0.296164	0.0377342
ID2-203	ID2	ENST00000396290.1_1	chr2:8822113-8824581	+	0.296184	0.025226
PGM2L1-201	PGM2L1	ENST00000298198.4_1	chr11:74041363-74109518	-	0.296262	0.00171673
DENR-201	DENR	ENST00000280557.10_1	chr12:123237321-123255611	+	0.296282	0.0229266
FAM122B-201	FAM122B	ENST00000298090.10_1	chrX:133903597-133931262	-	0.296441	0.00959531
NDE1-211	NDE1	ENST00000576502.5_1	chr16:15785057-15794348	+	0.296748	0.016319
SPDYC-201	SPDYC	ENST00000377185.2_1	chr11:64937625-64940715	+	0.297099	0.0236787
CHMP3-201	CHMP3	ENST00000263856.8_1	chr2:86730554-86790600	-	0.297103	0.0479272
SERPINB9-201	SERPINB9	ENST00000380698.4_1	chr6:2887500-2903514	-	0.29746	0.0178074
ELOVL7-206	ELOVL7	ENST00000511799.5_3	chr5:60060057-60139365	-	0.297823	0.00777491
NPTN-202	NPTN	ENST00000351217.10_1	chr15:73852355-73926475	-	0.297887	0.0291771
MCUB-201	MCUB	ENST00000394650.6_1	chr4:110481361-110609882	+	0.29792	0.0041165
TMEFF1-201	TMEFF1	ENST00000374879.4_1	chr9:103235395-103339918	+	0.298007	0.0073444
PCBP2-223	PCBP2	ENST00000552819.5_1	chr12:53848518-53873608	+	0.298088	0.016085
CHURC1-206	CHURC1	ENST00000552002.6_1	chr14:65381142-65401103	+	0.298311	0.00261389
MCRIP1-201	MCRIP1	ENST00000455127.6_3	chr17:79780287-79791144	-	0.298337	0.00700144
FBXW5-201	FBXW5	ENST00000325285.7_2	chr9:139834887-139839102	-	0.298667	0.0277667
ADH5-201	ADH5	ENST00000296412.12_1	chr4:99992129-100009902	-	0.299821	0.0144508
DEK-202	DEK	ENST00000397239.7_1	chr6:18224099-18265054	-	0.299947	0.0352277
APRT-202	APRT	ENST00000426324.6_1	chr16:88875877-88878333	-	0.300316	0.0490713
TNRC6B-204	TNRC6B	ENST00000441751.5_2	chr22:40440821-40552186	+	0.300425	0.0252846
ATP2C1-210	ATP2C1	ENST00000505330.5_1	chr3:130569439-130721994	+	0.30057	0.0153698
FKBP3-201	FKBP3	ENST00000216330.7_1	chr14:45584803-45604522	-	0.300851	0.0491197
INAFM2-202	INAFM2	ENST00000638170.1_1	chr15:40615865-40618916	+	0.301054	0.00829141
VPS25-201	VPS25	ENST00000253794.6_1	chr17:40925454-40931617	+	0.301084	0.0234126
RB1-201	RB1	ENST00000267163.4_1	chr13:48877911-49056122	+	0.301086	0.0115907
GTF2A1-203	GTF2A1	ENST00000553612.5_1	chr14:81641796-81687266	-	0.30142	0.000973688
CDC42BPB-201	CDC42BPB	ENST00000361246.6_1	chr14:103398716-103523799	-	0.301493	0.000874827
WIPF1-204	WIPF1	ENST00000392547.6_1	chr2:175424300-175499307	-	0.301661	0.00490391
TUFM-201	TUFM	ENST00000313511.7_1	chr16:28853732-28857729	-	0.301774	0.0136249
TSG101-201	TSG101	ENST00000251968.3_1	chr11:18501858-18548779	-	0.301876	0.00621017
TMED2-203	TMED2	ENST00000509052.2_1	chr12:124070109-124081640	+	0.302018	0.0294104
PPP2CB-201	PPP2CB	ENST00000221138.8_1	chr8:30643126-30670388	-	0.302505	0.021096
MED12L-206	MED12L	ENST00000474524.5_1	chr3:150804676-151154860	+	0.302599	0.000938598
ITGB3-201	ITGB3	ENST00000559488.5_1	chr17:45331212-45389182	+	0.302616	0.0095707
TBL1XR1-201	TBL1XR1	ENST00000352800.9_1	chr3:176768392-176915040	-	0.302756	0.0188556
LSM3-201	LSM3	ENST00000306024.3_1	chr3:14219858-14242619	+	0.303241	0.0219015
SZRD1-202	SZRD1	ENST00000401089.3_1	chr1:16693720-16724640	+	0.303278	0.0437572
CCAR2-212	CCAR2	ENST00000523349.5_1	chr8:22463232-22464838	+	0.303363	0.00797514
ZFAND5-204	ZFAND5	ENST00000376960.8_1	chr9:74969374-74980151	-	0.303405	0.0188807
LMNA-206	LMNA	ENST00000368300.8_1	chr1:156084498-156109880	+	0.303584	0.00922114
MOB1A-201	MOB1A	ENST00000396049.4_1	chr2:74379655-74405995	-	0.303636	0.00613532
TC2N-206	TC2N	ENST00000556018.5_1	chr14:92249167-92302870	-	0.303636	0.0438986
PEPD-201	PEPD	ENST00000244137.11_1	chr19:33877856-34012700	-	0.304071	0.00635416
CDC123-201	CDC123	ENST00000281141.8_1	chr10:12237965-12292587	+	0.304509	0.00131174
OSBP2-206	OSBP2	ENST00000431368.5_2	chr22:31277668-31303610	+	0.304816	0.038011
SLC25A39-201	SLC25A39	ENST00000225308.12_1	chr17:42396993-42402238	-	0.304887	0.00133114
EIF3C-201	EIF3C	ENST00000331666.10_1	chr16:28722684-28747051	+	0.305069	0.0243311
PDLIM7-202	PDLIM7	ENST00000355841.6_1	chr5:176910397-176924584	-	0.30518	0.0249713
UBXN1-202	UBXN1	ENST00000301935.9_1	chr11:62443970-62446562	-	0.305203	0.0346896
PRDX2-201	PRDX2	ENST00000301522.2_1	chr19:12907634-12912673	-	0.305319	0.0326275
ACAP2-201	ACAP2	ENST00000326793.10_2	chr3:194995465-195163807	-	0.305617	0.0260948
GMFG-207	GMFG	ENST00000598034.5_2	chr19:39818999-39826646	-	0.305882	0.0481949
PANX1-201	PANX1	ENST00000227638.7_1	chr11:93862094-93915138	+	0.306031	0.0446443
ANKIB1-201	ANKIB1	ENST00000265742.7_1	chr7:91875548-92030698	+	0.30606	0.00548829
CDK17-201	CDK17	ENST00000261211.7_1	chr12:96672039-96794338	-	0.306201	0.0139264
PITPNB-202	PITPNB	ENST00000335272.9_1	chr22:28247657-28315256	-	0.306254	0.00561279
RAD21-201	RAD21	ENST00000297338.6_1	chr8:117858174-117887105	-	0.306358	0.0386122
WRB-204	WRB	ENST00000398753.5_1	chr21:40752384-40769042	+	0.307021	0.017147
STK17A-201	STK17A	ENST00000319357.5_1	chr7:43622664-43666385	+	0.307153	0.0362525
AZIN1-201	AZIN1	ENST00000337198.9_1	chr8:103838585-103876965	-	0.307192	0.0103235
CLTC-201	CLTC	ENST00000269122.7_2	chr17:57697219-57773671	+	0.307329	0.029051
VMA21-201	VMA21	ENST00000330374.6_1	chrX:150565676-150577836	+	0.307821	0.00643994
ARL6IP1-201	ARL6IP1	ENST00000304414.11_1	chr16:18802989-18813000	-	0.307874	0.0391184
RSU1-205	RSU1	ENST00000602389.1_1	chr10:16632619-16859453	-	0.307899	0.0294282
TRAPPC3-209	TRAPPC3	ENST00000616395.4_1	chr1:36602171-36615115	-	0.308266	0.0303864
PTPRJ-207	PTPRJ	ENST00000613246.4_1	chr11:48002110-48192393	+	0.308427	0.00245007
CDC42-201	CDC42	ENST00000315554.12_4	chr1:22379182-22417297	+	0.308759	0.0314213
MSRA-201	MSRA	ENST00000317173.8_1	chr8:9911778-10286401	+	0.309053	0.0114292
PIKFYVE-201	PIKFYVE	ENST00000264380.8_1	chr2:209130991-209223475	+	0.309122	0.00152096
WDR1-205	WDR1	ENST00000502702.5_1	chr4:10076773-10118351	-	0.309328	0.0412802
KLF9-201	KLF9	ENST00000377126.3_1	chr9:72999513-73029540	-	0.309894	0.00282012
NUDT21-201	NUDT21	ENST00000300291.9_1	chr16:56463045-56485287	-	0.310352	0.0241061
MCTP1-202	MCTP1	ENST00000429576.6_1	chr5:94042284-94417349	-	0.310623	0.00336543
DCTN2-209	DCTN2	ENST00000548249.5_1	chr12:57923885-57941114	-	0.310841	0.0393108
GPD2-201	GPD2	ENST00000310454.10_1	chr2:157291953-157442915	+	0.31096	0.0135029
CAVIN2-201	CAVIN2	ENST00000304141.4_1	chr2:192699028-192711981	-	0.311594	0.00142671
NDUFB11-202	NDUFB11	ENST00000377811.3_1	chrX:47001615-47004903	-	0.311789	0.0225344
EIF5B-201	EIF5B	ENST00000289371.10_1	chr2:99953816-100017789	+	0.311807	0.000459691
DNAJC6-207	DNAJC6	ENST00000494710.6_1	chr1:65720145-65858271	+	0.311996	0.00707586
IGF2BP3-201	IGF2BP3	ENST00000258729.7_1	chr7:23349828-23510086	-	0.312206	0.0258831
MAPKAPK3-201	MAPKAPK3	ENST00000357955.6_1	chr3:50654601-50686719	+	0.312274	0.0381876
PIK3C3-201	PIK3C3	ENST00000262039.8_1	chr18:39535171-39667794	+	0.312401	0.00213099
ARPC5-202	ARPC5	ENST00000359856.10_1	chr1:183589981-183604861	-	0.312448	0.0135796
CDC42SE2-208	CDC42SE2	ENST00000505065.1_1	chr5:130599793-130730360	+	0.312517	0.0181352
GADD45A-202	GADD45A	ENST00000370986.8_1	chr1:68150744-68154021	+	0.312779	0.0253822
SNN-201	SNN	ENST00000329565.5_1	chr16:11762270-11773015	+	0.312894	0.00755866
SESN3-203	SESN3	ENST00000536441.6_2	chr11:94898677-94964361	-	0.312925	0.0114445
QARS-201	QARS	ENST00000306125.11_1	chr3:49133365-49142568	-	0.313056	0.0167755
MFAP3L-210	MFAP3L	ENST00000512698.1_1	chr4:170912980-170947467	-	0.313128	0.000426634
ACBD6-201	ACBD6	ENST00000367595.3_1	chr1:180257365-180472089	-	0.313149	0.0043426
USP9X-201	USP9X	ENST00000324545.8_2	chrX:40944888-41095832	+	0.313301	0.00557746
DAAM1-208	DAAM1	ENST00000556135.1_1	chr14:59655417-59758226	+	0.313559	0.0267474
ZFAND2A-201	ZFAND2A	ENST00000316495.7_1	chr7:1192543-1199814	-	0.313596	0.019914
PPP1R7-201	PPP1R7	ENST00000234038.10_1	chr2:242089437-242123067	+	0.313967	0.00153572
LRPPRC-201	LRPPRC	ENST00000260665.11_1	chr2:44113647-44223144	-	0.313982	0.0135076
TAL1-201	TAL1	ENST00000294339.3_1	chr1:47681964-47695443	-	0.314012	0.00516523
RHOC-202	RHOC	ENST00000339083.11_2	chr1:113243728-113250025	-	0.314456	0.0440324
POLR2E-213	POLR2E	ENST00000615234.4_1	chr19:1086578-1095356	-	0.314817	0.023989
AP3S1-201	AP3S1	ENST00000316788.11_1	chr5:115177178-115249778	+	0.315658	0.0181694
CLEC4A-201	CLEC4A	ENST00000229332.11_4	chr12:8276228-8291203	+	0.315937	0.0278634
NDUFC2-201	NDUFC2	ENST00000281031.4_3	chr11:77779350-77791265	-	0.316013	0.0196404
ARL15-202	ARL15	ENST00000504924.5_1	chr5:53180614-53606403	-	0.316172	0.0251135
PRELID3B-201	PRELID3B	ENST00000355937.8_1	chr20:57608200-57617964	-	0.31663	0.00602137
CARD19-201	CARD19	ENST00000375464.6_1	chr9:95858500-95875564	+	0.316636	0.0442701
PLXDC2-203	PLXDC2	ENST00000377252.4_1	chr10:20105168-20578785	+	0.316734	0.00362652
HNRNPUL2-201	HNRNPUL2	ENST00000301785.5_1	chr11:62480102-62494821	-	0.31702	0.026268
TPRG1L-202	TPRG1L	ENST00000378344.6_1	chr1:3541566-3546691	+	0.317023	0.0143492
ANXA6-213	ANXA6	ENST00000522664.5_1	chr5:150480273-150484833	-	0.31708	0.0184363
TSPYL1-201	TSPYL1	ENST00000368608.3_1	chr6:116597741-116601066	-	0.317406	0.00364844
ADI1-201	ADI1	ENST00000327435.10_1	chr2:3501132-3523507	-	0.317729	0.0345413
ZFAND1-219	ZFAND1	ENST00000522520.5_1	chr8:82614000-82633524	-	0.318042	0.0277936
DYNLL1-207	DYNLL1	ENST00000549989.1_1	chr12:120933916-120936153	+	0.318044	0.033354
PACSIN2-201	PACSIN2	ENST00000263246.7_1	chr22:43265777-43411151	-	0.318186	0.00245851
CUX1-212	CUX1	ENST00000547394.6_1	chr7:101459289-101927249	+	0.31838	0.0205287
THUMPD1-202	THUMPD1	ENST00000396083.6_1	chr16:20746697-20753118	-	0.318407	0.0237434
EIF3J-201	EIF3J	ENST00000261868.9_1	chr15:44829255-44855001	+	0.318506	0.0183872
ARHGAP9-204	ARHGAP9	ENST00000430041.6_3	chr12:57866053-57871981	-	0.318648	0.0208835
IL32-222	IL32	ENST00000533097.6_2	chr16:3115615-3119533	+	0.319073	0.0175427
MCUR1-201	MCUR1	ENST00000379170.8_2	chr6:13786789-13814800	-	0.319113	0.0400078
TM9SF2-201	TM9SF2	ENST00000376387.4_1	chr13:100153671-100216260	+	0.319144	0.0132895
ATP5J-204	ATP5J	ENST00000400093.3_1	chr21:27096791-27107984	-	0.31916	0.00345321
LAT-211	LAT	ENST00000566177.5_1	chr16:28996739-29001333	+	0.319642	0.0287167
NAPA-201	NAPA	ENST00000263354.7_1	chr19:47990894-48018497	-	0.319816	0.0287081
EGF-201	EGF	ENST00000265171.9_1	chr4:110834047-110933422	+	0.320194	0.00303457
WDFY4-202	WDFY4	ENST00000360890.6_3	chr10:49892921-49944287	+	0.320247	0.0111952
ATXN7L3B-201	ATXN7L3B	ENST00000519948.3_1	chr12:74931607-74939210	+	0.320352	0.0132381
CD2-202	CD2	ENST00000369478.3_1	chr1:117297007-117311850	+	0.320486	0.0188704
VPS51-201	VPS51	ENST00000279281.7_3	chr11:64863631-64879332	+	0.320608	0.0413689
SART1-201	SART1	ENST00000312397.9_1	chr11:65729160-65747299	+	0.320749	0.0356009
SIAE-201	SIAE	ENST00000263593.7_1	chr11:124503009-124543777	-	0.320891	0.00759336
RRAS2-211	RRAS2	ENST00000537760.5_1	chr11:14299472-14386052	-	0.321058	0.0302186
ELF1-201	ELF1	ENST00000239882.6_2	chr13:41506170-41593450	-	0.321076	0.0344309
SEL1L3-202	SEL1L3	ENST00000399878.7_2	chr4:25749049-25864581	-	0.321425	0.0335825
AKR1B1-201	AKR1B1	ENST00000285930.8_1	chr7:134127102-134143894	-	0.321543	0.0133134
PHKB-201	PHKB	ENST00000299167.12_1	chr16:47495237-47735434	+	0.322033	0.0206319
PSMD13-212	PSMD13	ENST00000532097.5_1	chr11:236546-252956	+	0.322148	0.0251834
SLC38A1-201	SLC38A1	ENST00000398637.9_1	chr12:46576846-46662795	-	0.32313	0.0455775
FAM192A-218	FAM192A	ENST00000567439.5_1	chr16:57188112-57219952	-	0.323197	0.0111019
MMP24-AS1-201	MMP24-AS1	ENST00000424358.1_1	chr20:33864953-33865932	-	0.323256	0.015771
IVNS1ABP-203	IVNS1ABP	ENST00000422754.1_1	chr1:185275882-185276794	-	0.323587	0.0261209
TIMMDC1-208	TIMMDC1	ENST00000494664.5_1	chr3:119217379-119243937	+	0.323929	0.0144332
LTBP1-201	LTBP1	ENST00000402934.5_1	chr2:33359692-33624424	+	0.323991	0.0308473
FTH1-206	FTH1	ENST00000530019.5_3	chr11:61727294-61735103	-	0.324064	0.0286834
COX7A2L-201	COX7A2L	ENST00000234301.2_1	chr2:42577647-42588356	-	0.325042	0.0175228
SUMO2-202	SUMO2	ENST00000420826.6_1	chr17:73161681-73179078	-	0.325224	0.0004257
NPEPPS-201	NPEPPS	ENST00000322157.8_1	chr17:45608430-45700642	+	0.325226	0.0190388
COPB2-201	COPB2	ENST00000333188.9_1	chr3:139076248-139108574	-	0.325299	0.0168197
RBM8A-204	RBM8A	ENST00000583313.6_1	chr1:145507557-145513536	+	0.325396	0.0282449
STAT4-202	STAT4	ENST00000392320.6_1	chr2:191894306-192015986	-	0.325434	0.0292999
KPNA1-201	KPNA1	ENST00000344337.10_1	chr3:122140796-122233775	-	0.325683	0.00295708
TRAPPC3L-201	TRAPPC3L	ENST00000356128.4_1	chr6:116816152-116833506	-	0.325834	0.0328773
MAP3K12-201	MAP3K12	ENST00000267079.6_1	chr12:53873453-53893399	-	0.325877	0.0027327
KLHL8-201	KLHL8	ENST00000273963.9_1	chr4:88081255-88141760	-	0.326117	0.00472106
HRASLS-201	HRASLS	ENST00000264735.2_1	chr3:192958914-192988644	+	0.326284	0.0458251
RPL11-203	RPL11	ENST00000458455.1_2	chr1:24019099-24022618	+	0.326285	0.0176842
PDS5A-201	PDS5A	ENST00000303538.12_1	chr4:39824483-39979576	-	0.326514	0.0365109
SUCLG2-201	SUCLG2	ENST00000307227.9_2	chr3:67425143-67705038	-	0.326824	0.0359663
FGFR1OP2-202	FGFR1OP2	ENST00000327214.5_1	chr12:27091433-27119583	+	0.326982	0.0209769
ZEB2-215	ZEB2	ENST00000465070.5_1	chr2:145268952-145277899	-	0.327063	0.00662365
ACTR3-201	ACTR3	ENST00000263238.6_1	chr2:114647537-114720173	+	0.327087	0.023983
PSMA5-201	PSMA5	ENST00000271308.8_1	chr1:109941653-109968973	-	0.327155	0.005722
HIST1H3H-201	HIST1H3H	ENST00000369163.3_1	chr6:27777842-27779078	+	0.327447	0.0219055
TNFRSF14-201	TNFRSF14	ENST00000355716.4_1	chr1:2487805-2495268	+	0.32765	0.0202519
PKIA-202	PKIA	ENST00000396418.6_1	chr8:79428374-79517502	+	0.327699	0.00563188
RAB6B-201	RAB6B	ENST00000285208.8_1	chr3:133543083-133614660	-	0.327815	0.0394992
ITM2A-201	ITM2A	ENST00000373298.6_1	chrX:78615881-78622856	-	0.327916	0.0190437
TRAF3IP3-203	TRAF3IP3	ENST00000367025.7_2	chr1:209929394-209955660	+	0.328194	0.0283939
PARP15-205	PARP15	ENST00000483793.5_1	chr3:122296475-122357894	+	0.328326	0.00308986
CDKAL1-201	CDKAL1	ENST00000274695.8_1	chr6:20534688-21232635	+	0.328407	0.00987963
CDCA7L-205	CDCA7L	ENST00000435717.1_1	chr7:21942272-21943877	-	0.328454	0.0256718
MCM3-207	MCM3	ENST00000616552.4_1	chr6:52128812-52149679	-	0.328529	0.033235
UBXN7-201	UBXN7	ENST00000296328.8_1	chr3:196074533-196159345	-	0.328583	0.00614353
RASSF3-204	RASSF3	ENST00000542104.5_2	chr12:65004293-65091347	+	0.329131	0.0436487
TOMM5-201	TOMM5	ENST00000321301.6_1	chr9:37588410-37592639	-	0.329158	0.0235948
ATM-215	ATM	ENST00000530958.5_1	chr11:108093830-108107261	+	0.329198	0.0264133
ANAPC13-204	ANAPC13	ENST00000510994.5_1	chr3:134196548-134204865	-	0.329249	0.0022482
PDE6D-201	PDE6D	ENST00000287600.8_1	chr2:232597135-232646019	-	0.329453	0.00820286
CTDSPL-206	CTDSPL	ENST00000443503.6_2	chr3:37903451-38025960	+	0.329558	0.0401267
RPS14-202	RPS14	ENST00000401695.7_1	chr5:149822753-149829310	-	0.329805	0.0462012
ZNF25-201	ZNF25	ENST00000302609.7_1	chr10:38238500-38265561	-	0.33015	0.000414754
RHOBTB1-201	RHOBTB1	ENST00000337910.9_1	chr10:62629196-62704005	-	0.330204	0.0433432
GMPS-203	GMPS	ENST00000496455.6_1	chr3:155588325-155661815	+	0.330238	0.00964748
FCGR3A-203	FCGR3A	ENST00000426740.6_3	chr1:161511645-161519688	-	0.330685	0.0326242
STK24-208	STK24	ENST00000539966.5_1	chr13:99097439-99229117	-	0.330734	0.00688729
WDR41-201	WDR41	ENST00000296679.8_1	chr5:76726758-76788421	-	0.33088	0.0111879
SYPL1-202	SYPL1	ENST00000455385.6_1	chr7:105730949-105752777	-	0.331224	0.0151186
NACA-204	NACA	ENST00000546392.5_2	chr12:57106288-57119138	-	0.331309	0.048988
PPBP-201	PPBP	ENST00000296028.3_1	chr4:74852755-74853914	-	0.331331	0.00102966
CEP192-203	CEP192	ENST00000506447.5_3	chr18:12991361-13125035	+	0.331563	0.00454585
CALCOCO2-201	CALCOCO2	ENST00000258947.7_4	chr17:46908350-46942607	+	0.331686	0.00300832
FURIN-208	FURIN	ENST00000640725.1_1	chr15:91422950-91423375	+	0.331878	0.00769767
CCPG1-201	CCPG1	ENST00000310958.10_2	chr15:55647448-55700708	-	0.331978	0.011798
MAP2K4-202	MAP2K4	ENST00000415385.7_1	chr17:11924151-12047147	+	0.332121	0.0078272
ATXN10-201	ATXN10	ENST00000252934.9_1	chr22:46067679-46241187	+	0.332209	0.0244409
TMEM248-201	TMEM248	ENST00000341567.8_1	chr7:66386212-66423538	+	0.332283	0.045425
STRN3-201	STRN3	ENST00000355683.9_2	chr14:31363005-31495607	-	0.332288	0.018261
ETFB-201	ETFB	ENST00000309244.8_1	chr19:51848425-51869672	-	0.33243	0.0189118
C9orf40-201	C9orf40	ENST00000376854.5_1	chr9:77561497-77567802	-	0.332711	0.00111503
MBNL3-207	MBNL3	ENST00000421707.1_2	chrX:131518691-131623043	-	0.332857	0.0463991
XRN2-201	XRN2	ENST00000377191.4_1	chr20:21283942-21370465	+	0.333062	0.039191
CREBRF-201	CREBRF	ENST00000296953.6_1	chr5:172483355-172566287	+	0.333541	0.0162392
MAOB-201	MAOB	ENST00000378069.4_1	chrX:43625858-43741693	-	0.333566	0.00354847
BANK1-207	BANK1	ENST00000508653.5_2	chr4:102711887-102994905	+	0.333824	0.0232796
ASNA1-205	ASNA1	ENST00000611688.1_1	chr19:12848369-12859136	+	0.334156	0.0244423
FOXN3-204	FOXN3	ENST00000553840.5_3	chr14:89629222-89878369	-	0.334186	0.00849336
AKT3-203	AKT3	ENST00000366539.5_1	chr1:243665065-244013430	-	0.33426	0.0453143
TTC39C-202	TTC39C	ENST00000317571.7_1	chr18:21594600-21712992	+	0.334936	0.00884301
SNTB1-201	SNTB1	ENST00000395601.7_1	chr8:121547985-121825513	-	0.335115	0.0134694
TMPO-212	TMPO	ENST00000556029.5_2	chr12:98909290-98944157	+	0.335304	0.0176129
CDC27-201	CDC27	ENST00000066544.7_1	chr17:45195069-45266632	-	0.33546	0.00494777
RICTOR-202	RICTOR	ENST00000357387.7_1	chr5:38938021-39074510	-	0.335901	0.00392165
RASA2-201	RASA2	ENST00000286364.7_1	chr3:141205891-141334184	+	0.336006	0.0229209
NFKB1-201	NFKB1	ENST00000226574.8_1	chr4:103422486-103538459	+	0.336071	0.0111194
MYCT1-201	MYCT1	ENST00000367245.5_3	chr6:153019030-153045702	+	0.336458	0.0216836
COTL1-206	COTL1	ENST00000567786.2_1	chr16:84649610-84651165	-	0.336754	0.00479033
CD2AP-201	CD2AP	ENST00000359314.5_1	chr6:47445525-47594999	+	0.336983	0.0204009
CFL1-211	CFL1	ENST00000531407.5_1	chr11:65622480-65625339	-	0.337102	0.0410112
PELI1-201	PELI1	ENST00000358912.4_1	chr2:64319786-64371588	-	0.337306	0.0383643
ARPC4-TTLL3-204	ARPC4-TTLL3	ENST00000453882.1_3	chr3:9839342-9854722	+	0.337437	0.0324087
RNF19A-205	RNF19A	ENST00000519449.5_1	chr8:101269288-101315487	-	0.337585	0.0138714
CA13-201	CA13	ENST00000321764.3_1	chr8:86157756-86196302	+	0.337762	0.00877069
FOXO1-201	FOXO1	ENST00000379561.5_1	chr13:41129804-41240734	-	0.337798	0.0274477
KLHL8-208	KLHL8	ENST00000512111.1_1	chr4:88083674-88141420	-	0.337964	0.00728782
NDUFA3-214	NDUFA3	ENST00000485876.5_1	chr19:54606145-54610875	+	0.338209	0.0010038
PCYT1B-202	PCYT1B	ENST00000379144.6_1	chrX:24579959-24665353	-	0.338342	0.0345622
SEPT9-236	2019-09-09	ENST00000591088.5_1	chr17:75447326-75495106	+	0.338663	0.0328147
NSA2-201	NSA2	ENST00000296802.9_1	chr5:74062816-74072735	+	0.339187	0.0188027
RNF114-201	RNF114	ENST00000244061.5_1	chr20:48552885-48570429	+	0.339247	0.0325763
GNPAT-201	GNPAT	ENST00000366647.8_1	chr1:231376956-231413719	+	0.339727	0.0175766
SLC25A38-201	SLC25A38	ENST00000273158.8_1	chr3:39424839-39438842	+	0.339909	0.0168439
MTPN-201	MTPN	ENST00000393085.3_1	chr7:135611509-135662064	-	0.34002	0.0103511
POLA1-202	POLA1	ENST00000379068.7_2	chrX:24712036-25015103	+	0.340166	0.0121891
CAST-207	CAST	ENST00000395813.5_1	chr5:96038493-96110383	+	0.340319	0.0236663
C7orf26-201	C7orf26	ENST00000344417.9_3	chr7:6629648-6648357	+	0.34033	0.00158204
RHOA-206	RHOA	ENST00000454011.6_2	chr3:49397325-49449361	-	0.340338	0.0225853
PCBP2-217	PCBP2	ENST00000550520.6_1	chr12:53845963-53854927	+	0.340341	0.0211964
TAOK3-218	TAOK3	ENST00000542902.5_2	chr12:118682719-118796971	-	0.340599	0.0450416
APP-202	APP	ENST00000348990.9_1	chr21:27252861-27543085	-	0.340612	0.0226961
FAM104A-201	FAM104A	ENST00000403627.7_1	chr17:71203492-71228506	-	0.34067	0.0273821
KIAA1143-201	KIAA1143	ENST00000296121.5_1	chr3:44790236-44803154	-	0.340699	0.00334116
MRPS9-201	MRPS9	ENST00000258455.7_1	chr2:105654441-105716418	+	0.340794	0.0488725
CD79A-202	CD79A	ENST00000444740.2_2	chr19:42381375-42385047	+	0.340842	0.027778
SAR1B-201	SAR1B	ENST00000402673.6_1	chr5:133936834-133968678	-	0.341249	0.00313036
KPNB1-201	KPNB1	ENST00000290158.8_1	chr17:45727204-45762871	+	0.341294	0.0135031
PBX1-209	PBX1	ENST00000485769.5_1	chr1:164528437-164529594	+	0.341388	0.0205443
USP47-203	USP47	ENST00000399455.2_2	chr11:11863613-11980870	+	0.341635	0.00829689
DAP3-201	DAP3	ENST00000343043.7_1	chr1:155658874-155708317	+	0.34183	0.0204098
MRPS30-202	MRPS30	ENST00000507110.5_1	chr5:44809027-44815624	+	0.34192	0.0167443
RAB14-201	RAB14	ENST00000373840.8_1	chr9:123940415-123964147	-	0.341967	0.00356256
TMEM185A-207	TMEM185A	ENST00000600449.7_3	chrX:148678216-148713568	-	0.341971	0.00481184
ZEB2-214	ZEB2	ENST00000462355.2_1	chr2:145270990-145275317	-	0.341995	0.0157923
TMEM40-204	TMEM40	ENST00000435218.6_3	chr3:12775415-12800758	-	0.342111	0.0383952
MED10-201	MED10	ENST00000255764.3_1	chr5:6371994-6378707	-	0.342144	0.0147238
ABI1-209	ABI1	ENST00000376166.5_1	chr10:27035522-27149915	-	0.342658	0.024927
C14orf2-202	C14orf2	ENST00000414262.6_1	chr14:104378639-104387838	-	0.342726	0.0472957
AVPR1A-201	AVPR1A	ENST00000299178.3_1	chr12:63536539-63544722	-	0.342759	0.0062938
TNFAIP8L2-201	TNFAIP8L2	ENST00000368910.3_1	chr1:151129105-151132225	+	0.342775	0.0487858
PPM1A-202	PPM1A	ENST00000325658.3_1	chr14:60716159-60755273	+	0.342881	0.0295802
AP1B1-208	AP1B1	ENST00000432560.6_1	chr22:29723671-29784572	-	0.343079	0.01647
TUBB1-201	TUBB1	ENST00000217133.1_1	chr20:57594309-57601709	+	0.343314	0.00232526
TWSG1-201	TWSG1	ENST00000262120.9_1	chr18:9334765-9402418	+	0.343392	0.0358266
SGMS1-202	SGMS1	ENST00000361781.6_1	chr10:52065360-52383743	-	0.343504	0.00823836
RAP2B-201	RAP2B	ENST00000323534.4_2	chr3:152880059-152888409	+	0.343769	0.0291596
MTM1-203	MTM1	ENST00000370396.6_1	chrX:149737069-149841795	+	0.343947	0.0060864
CHCHD3-201	CHCHD3	ENST00000262570.9_2	chr7:132469629-132766842	-	0.344321	0.00779306
DGKG-201	DGKG	ENST00000265022.7_1	chr3:185864990-186080026	-	0.34441	0.00722741
AIG1-208	AIG1	ENST00000494282.6_1	chr6:143382038-143511734	+	0.344438	0.00683671
MPP7-201	MPP7	ENST00000337532.9_1	chr10:28339922-28569071	-	0.344516	0.00586019
ARL5B-201	ARL5B	ENST00000377275.3_1	chr10:18948334-18970568	+	0.344816	0.00983592
OXA1L-213	OXA1L	ENST00000612549.4_1	chr14:23235731-23242250	+	0.344886	0.0315364
RAP1B-232	RAP1B	ENST00000545270.5_1	chr12:69004693-69050128	+	0.344899	0.0436407
KDM1A-202	KDM1A	ENST00000400181.8_1	chr1:23345986-23410181	+	0.345542	0.00840737
DNM2-203	DNM2	ENST00000389253.8_3	chr19:10828807-10942579	+	0.345633	0.012891
HLA-DQA1-202	HLA-DQA1	ENST00000374949.2_1	chr6:32605197-32610794	+	0.34595	0.0117314
NAP1L1-222	NAP1L1	ENST00000551992.5_3	chr12:76447109-76477874	-	0.346687	0.00321565
MS4A1-202	MS4A1	ENST00000389939.2_1	chr11:60229654-60238225	+	0.34671	0.00273076
SF1-216	SF1	ENST00000486867.1_1	chr11:64533493-64536543	-	0.34726	0.0257238
WDR82-201	WDR82	ENST00000296490.7_1	chr3:52288437-52312659	-	0.347517	0.0469011
THOC2-201	THOC2	ENST00000245838.12_1	chrX:122734413-122866904	-	0.347529	0.0447631
RHOU-201	RHOU	ENST00000366691.3_1	chr1:228870824-228882416	+	0.347618	0.00950503
PIK3CB-201	PIK3CB	ENST00000289153.6_1	chr3:138371541-138478201	-	0.347708	0.02636
PPIA-201	PPIA	ENST00000355968.10_1	chr7:44836280-44841230	+	0.347883	0.033966
BSG-214	BSG	ENST00000614867.2_1	chr19:572623-583487	+	0.348157	0.0464992
SLC37A1-201	SLC37A1	ENST00000352133.2_1	chr21:43934024-44001550	+	0.348232	0.0238479
MED4-201	MED4	ENST00000258648.6_1	chr13:48650092-48669240	-	0.348365	0.00487262
MAGED2-202	MAGED2	ENST00000347546.8_1	chrX:54834180-54842440	+	0.3489	0.0203526
ARID1B-218	ARID1B	ENST00000636748.1_2	chr6:157100534-157265035	+	0.349152	0.000831578
MT-CO3-201	MT-CO3	ENST00000362079.2	chrM:9207-9990	+	0.349359	0.0415748
CLASP2-204	CLASP2	ENST00000399362.8_1	chr3:33537737-33759848	-	0.349486	0.00465962
GCLM-201	GCLM	ENST00000370238.7_1	chr1:94350761-94374966	-	0.34951	0.0164842
PPP6C-201	PPP6C	ENST00000373547.8_1	chr9:127908852-127952097	-	0.349616	0.0330793
MEX3C-201	MEX3C	ENST00000406189.3_1	chr18:48700920-48723690	-	0.349839	0.0424086
TMEM106C-202	TMEM106C	ENST00000429772.6_1	chr12:48357403-48362661	+	0.349953	0.0311152
PXK-204	PXK	ENST00000383716.7_1	chr3:58318617-58411853	+	0.350039	0.0249354
ZFAND6-220	ZFAND6	ENST00000561060.5_1	chr15:80351955-80430020	+	0.350249	0.0314729
BTBD10-201	BTBD10	ENST00000278174.9_1	chr11:13409548-13484827	-	0.350362	0.0282968
PAPSS2-201	PAPSS2	ENST00000361175.8_1	chr10:89419370-89507462	+	0.350463	0.0017185
ARHGAP32-204	ARHGAP32	ENST00000525234.1_1	chr11:128936639-129149219	-	0.350589	0.0397648
GDI2-202	GDI2	ENST00000380181.7_1	chr10:5807917-5855374	-	0.35069	0.0312365
ZC3H15-201	ZC3H15	ENST00000337859.10_1	chr2:187350883-187374090	+	0.351067	0.0353146
TRAPPC1-201	TRAPPC1	ENST00000303731.8_1	chr17:7833667-7835263	-	0.351124	0.0159139
SARNP-201	SARNP	ENST00000336133.7_1	chr12:56151058-56211540	-	0.351335	0.0323851
RSPH14-203	RSPH14	ENST00000421213.1_1	chr22:23466414-23476261	-	0.351351	0.0229288
CCL5-201	CCL5	ENST00000603197.5_1	chr17:34198495-34207512	-	0.351388	0.0350001
NCOA2-201	NCOA2	ENST00000452400.6_1	chr8:71021997-71316040	-	0.351596	0.0313276
NRGN-201	NRGN	ENST00000284292.10_1	chr11:124609742-124617106	+	0.35164	0.0271388
FAM110A-203	FAM110A	ENST00000381939.1_1	chr20:814427-826922	+	0.351795	0.0267573
FAH-213	FAH	ENST00000561421.5_1	chr15:80445239-80478682	+	0.351817	0.0342289
CHMP2B-201	CHMP2B	ENST00000263780.8_1	chr3:87276435-87304649	+	0.351823	0.0468711
RRAGC-201	RRAGC	ENST00000373001.3_1	chr1:39303870-39325495	-	0.351882	0.00182949
TMEM14B-202	TMEM14B	ENST00000379542.9_1	chr6:10747992-10757214	+	0.351902	0.0159714
TFCP2-201	TFCP2	ENST00000257915.9_1	chr12:51487446-51566664	-	0.352153	0.00559229
ENO2-201	ENO2	ENST00000229277.5_1	chr12:7023614-7032859	+	0.352305	0.00787875
MRPL12-201	MRPL12	ENST00000333676.7_1	chr17:79670387-79674556	+	0.352695	0.0449685
M6PR-005	M6PR	ENST00000543159.1	chr12:9098081-9099444	-	0.352775	0.0315452
PPIL3-202	PPIL3	ENST00000392283.8_1	chr2:201735679-201753877	-	0.353039	0.00787046
JADE2-201	JADE2	ENST00000282605.8_2	chr5:133861347-133915164	+	0.353071	0.021343
RBMX-201	RBMX	ENST00000320676.11_1	chrX:135955620-135962884	-	0.353133	0.031503
RNF216-205	RNF216	ENST00000425013.6_1	chr7:5659678-5821327	-	0.353211	0.00238355
IREB2-201	IREB2	ENST00000258886.12_1	chr15:78730531-78793798	+	0.353265	0.01757
KIAA1191-201	KIAA1191	ENST00000298569.8_1	chr5:175773064-175788971	-	0.353356	0.0390297
SPTB-208	SPTB	ENST00000556626.5_3	chr14:65213001-65346601	-	0.353365	0.0389241
TBC1D1-209	TBC1D1	ENST00000446803.6_1	chr4:37978931-38091686	+	0.353699	0.0328603
TMED8-201	TMED8	ENST00000216468.7_1	chr14:77801364-77843452	-	0.353866	0.010685
TOLLIP-202	TOLLIP	ENST00000317204.10_1	chr11:1295601-1330852	-	0.354151	0.00912346
SWI5-203	SWI5	ENST00000418976.1_1	chr9:131038523-131051268	+	0.354266	0.0286109
DNAJB4-201	DNAJB4	ENST00000370763.5_1	chr1:78470538-78483648	+	0.354793	0.00351045
SNU13-201	SNU13	ENST00000215956.9_1	chr22:42069958-42078626	-	0.35483	0.0256512
CHMP5-201	CHMP5	ENST00000223500.8_1	chr9:33264940-33281537	+	0.354971	0.029174
RAPGEF6-208	RAPGEF6	ENST00000509018.5_1	chr5:130759614-130970929	-	0.3553	0.00424828
CCNB1-201	CCNB1	ENST00000256442.9_1	chr5:68462837-68474072	+	0.355732	0.016493
STAP1-201	STAP1	ENST00000265404.6_1	chr4:68424446-68472616	+	0.355734	0.0298667
PHC3-211	PHC3	ENST00000486042.1_1	chr3:169834911-169846595	-	0.356117	0.025506
TSPAN9-202	TSPAN9	ENST00000407263.2_2	chr12:3310343-3391274	+	0.35647	0.0152096
NCAPD2-201	NCAPD2	ENST00000315579.9_1	chr12:6602545-6641121	+	0.356636	0.0191557
CAV2-201	CAV2	ENST00000222693.4_1	chr7:116139444-116148595	+	0.356874	0.000442898
ANKHD1-EIF4EBP3-203	ANKHD1-EIF4EBP3	ENST00000532219.5_3	chr5:139781493-139929154	+	0.356976	0.0324317
ZBTB11-201	ZBTB11	ENST00000312938.4_1	chr3:101367733-101396339	-	0.357391	0.0163538
IKBKG-214	IKBKG	ENST00000618670.4_1	chrX:153770459-153793261	+	0.357836	0.0163604
VTI1B-204	VTI1B	ENST00000554659.5_1	chr14:68113792-68141548	-	0.357879	0.00210252
TMEM219-208	TMEM219	ENST00000575829.6_1	chr16:29973408-29982787	+	0.358077	0.0239663
FUT8-204	FUT8	ENST00000394586.6_1	chr14:65877840-66209860	+	0.358093	0.00487783
PCM1-201	PCM1	ENST00000325083.12_1	chr8:17780349-17885477	+	0.358351	0.0293992
BZW2-207	BZW2	ENST00000433922.6_2	chr7:16685759-16746137	+	0.358494	0.0478779
ZNRF2-201	ZNRF2	ENST00000323037.4_1	chr7:30323923-30407308	+	0.358824	0.0396793
EBF1-201	EBF1	ENST00000313708.10_1	chr5:158122928-158526769	-	0.358948	0.01596
COPS2-202	COPS2	ENST00000388901.9_1	chr15:49414925-49447849	-	0.359087	2.12e-05
NCOA3-201	NCOA3	ENST00000371997.3_1	chr20:46130685-46284486	+	0.359571	0.02123
MALT1-202	MALT1	ENST00000348428.7_2	chr18:56338618-56421709	+	0.359954	0.0159249
ABCE1-201	ABCE1	ENST00000296577.8_1	chr4:146019084-146050331	+	0.360122	0.0120528
VEPH1-201	VEPH1	ENST00000362010.6_1	chr3:156977531-157221216	-	0.360372	0.00990521
TAF4-201	TAF4	ENST00000252996.8_1	chr20:60549854-60640866	-	0.361142	0.00465447
TMEM219-201	TMEM219	ENST00000279396.10_1	chr16:29973351-29984373	+	0.361296	0.0232893
KIAA0368-201	KIAA0368	ENST00000259335.8_1	chr9:114122973-114247025	-	0.361303	0.0128455
UFM1-201	UFM1	ENST00000239878.8_1	chr13:38924018-38937756	+	0.361392	0.00580176
ATL1-202	ATL1	ENST00000441560.6_1	chr14:50999744-51099767	+	0.361615	0.00671758
PPP4R2-201	PPP4R2	ENST00000356692.9_1	chr3:73045936-73118350	+	0.361653	0.0352772
PCMTD1-201	PCMTD1	ENST00000360540.9_1	chr8:52730140-52811658	-	0.361806	0.0189803
PRUNE1-207	PRUNE1	ENST00000450884.5_1	chr1:150980953-151006313	+	0.361889	0.0490512
ARGLU1-203	ARGLU1	ENST00000400198.7_2	chr13:107194021-107220512	-	0.361943	0.0465961
WBP1-201	WBP1	ENST00000233615.6_3	chr2:74685456-74688018	+	0.362193	0.0370875
ATM-209	ATM	ENST00000526567.5_1	chr11:108094256-108100091	+	0.36226	0.0323099
USF2-202	USF2	ENST00000343550.9_2	chr19:35759881-35770718	+	0.362409	0.020614
ADAM28-201	ADAM28	ENST00000265769.8_1	chr8:24151553-24216531	+	0.362488	0.00358686
SPIN1-201	SPIN1	ENST00000375859.3_1	chr9:91003334-91093609	+	0.362515	0.0124403
PBX1-203	PBX1	ENST00000420696.6_1	chr1:164528872-164821068	+	0.362534	0.0136361
DCUN1D1-201	DCUN1D1	ENST00000292782.8_1	chr3:182655862-182698431	-	0.362627	0.00232457
MBNL3-201	MBNL3	ENST00000370839.7_1	chrX:131513232-131573718	-	0.362832	0.0363391
PCBP2-226	PCBP2	ENST00000562264.5_2	chr12:53848644-53873467	+	0.362878	0.0459481
METTL25-207	METTL25	ENST00000550058.1_1	chr12:82752673-82792734	+	0.362926	0.0104008
APPL2-201	APPL2	ENST00000258530.7_1	chr12:105567074-105630016	-	0.362999	0.0196109
PDHX-203	PDHX	ENST00000448838.7_1	chr11:34937677-35017669	+	0.363039	0.0182221
NDUFAB1-201	NDUFAB1	ENST00000007516.7_1	chr16:23592323-23607677	-	0.363179	0.0293199
EMC6-201	EMC6	ENST00000248378.5_1	chr17:3572109-3572959	+	0.363343	0.00800714
TAF2-201	TAF2	ENST00000378164.6_1	chr8:120743015-120845103	-	0.363492	0.00993718
GPR137B-202	GPR137B	ENST00000366592.7_3	chr1:236305832-236372209	+	0.363698	0.0143889
USP10-201	USP10	ENST00000219473.11_2	chr16:84733584-84813187	+	0.364232	0.0461142
RAB2B-201	RAB2B	ENST00000397762.5_1	chr14:21927179-21945132	-	0.364314	0.017353
NDEL1-201	NDEL1	ENST00000334527.11_1	chr17:8339179-8371478	+	0.36521	0.0200131
CSPP1-201	CSPP1	ENST00000262210.9_1	chr8:67976603-68108498	+	0.365678	0.0182844
FBXL4-202	FBXL4	ENST00000369244.6_1	chr6:99316414-99395802	-	0.365683	0.00551114
ELOVL5-201	ELOVL5	ENST00000304434.10_1	chr6:53132197-53213805	-	0.365763	0.025967
ARPC1B-205	ARPC1B	ENST00000427217.5_1	chr7:98972353-98985890	+	0.36577	0.00723954
ZCCHC6-201	ZCCHC6	ENST00000277141.10_2	chr9:88902648-88969325	-	0.366034	0.0405252
IDH3G-201	IDH3G	ENST00000217901.9_1	chrX:153051221-153059978	-	0.366047	0.0134383
NCKAP1-202	NCKAP1	ENST00000361354.8_1	chr2:183773843-183903200	-	0.366146	0.000516345
DAXX-201	DAXX	ENST00000266000.10_3	chr6:33286335-33290787	-	0.366808	0.0137637
RABGAP1-202	RABGAP1	ENST00000373647.8_1	chr9:125703288-125867145	+	0.366879	0.014628
MBNL3-208	MBNL3	ENST00000436215.5_2	chrX:131516244-131623894	-	0.367107	0.0136327
RBM4-205	RBM4	ENST00000409406.1_1	chr11:66406406-66413938	+	0.367241	0.0176175
FBXO11-202	FBXO11	ENST00000403359.7_1	chr2:48034059-48132932	-	0.367399	0.0169781
EVA1B-201	EVA1B	ENST00000270824.1_1	chr1:36787632-36789755	-	0.367464	0.0309449
SLC25A24-203	SLC25A24	ENST00000565488.5_1	chr1:108676658-108742980	-	0.36757	0.0397711
KRCC1-201	KRCC1	ENST00000347055.3_1	chr2:88326724-88355248	-	0.3676	0.0300341
RPL12-205	RPL12	ENST00000536368.1_1	chr9:130209956-130213652	-	0.367689	0.029502
WDR1-202	WDR1	ENST00000382451.6_1	chr4:10075964-10118573	-	0.36794	0.0369898
U2AF1L5-201	U2AF1L5	ENST00000610664.4_3	chr21:44513066-44527632	-	0.368291	0.00471681
TDRD3-208	TDRD3	ENST00000535286.5_2	chr13:60971427-61148012	+	0.368376	0.016327
KLRB1-201	KLRB1	ENST00000229402.3_1	chr12:9747147-9760482	-	0.368679	0.0305445
CAND1-208	CAND1	ENST00000545606.5_1	chr12:67663061-67713731	+	0.368873	0.000735996
FBXW4-201	FBXW4	ENST00000331272.7_1	chr10:103370423-103455016	-	0.369055	0.00633892
DAAM1-201	DAAM1	ENST00000360909.7_1	chr14:59655398-59836471	+	0.369059	0.0233837
KIAA1468-202	KIAA1468	ENST00000398130.6_2	chr18:59854507-59975062	+	0.369151	0.010284
MARCH7-201	2019-03-07	ENST00000259050.8_1	chr2:160569010-160627538	+	0.369316	0.0373116
ARHGEF2-208	ARHGEF2	ENST00000470541.6_1	chr1:155916647-155921539	-	0.369509	0.0426056
RALGPS2-203	RALGPS2	ENST00000367634.6_1	chr1:178694282-178890976	+	0.369551	0.0188549
LSM1-203	LSM1	ENST00000520755.5_1	chr8:38020853-38034192	-	0.36986	0.0369769
POU2F2-218	POU2F2	ENST00000598842.2_3	chr19:42597619-42599763	-	0.370162	0.0282909
HLA-DMB-258	HLA-DMB	ENST00000418107.2_1	chr6:32902406-32908847	-	0.370171	0.0359189
BZW1-203	BZW1	ENST00000409600.5_1	chr2:201676269-201692061	+	0.370579	0.0245478
RANBP2-201	RANBP2	ENST00000283195.10_1	chr2:109335937-109402267	+	0.370622	0.00202172
TMEM56-201	TMEM56	ENST00000370203.8_1	chr1:95582894-95663163	+	0.370694	0.00313613
BTN3A2-202	BTN3A2	ENST00000377708.6_1	chr6:26365492-26376464	+	0.370842	0.0445203
NAP1L4-203	NAP1L4	ENST00000430811.5_1	chr11:2991033-3013332	-	0.371052	0.0238786
RASGRP1-201	RASGRP1	ENST00000310803.9_1	chr15:38780304-38857007	-	0.371148	0.00634422
LYRM4-208	LYRM4	ENST00000500576.4_3	chr6:5186834-5260970	-	0.371426	0.0157992
FCRL3-201	FCRL3	ENST00000368184.7_2	chr1:157646272-157670647	-	0.371684	0.00384854
HNRNPR-210	HNRNPR	ENST00000478691.5_1	chr1:23631181-23670829	-	0.372623	0.0321269
BLOC1S5-202	BLOC1S5	ENST00000397457.6_2	chr6:8013800-8064647	-	0.372741	0.0490572
RBM26-204	RBM26	ENST00000449987.6_2	chr13:79885959-79915347	-	0.372854	0.0224087
CTNNB1-203	CTNNB1	ENST00000396185.7_1	chr3:41240996-41281934	+	0.373053	0.0163026
OPN3-201	OPN3	ENST00000366554.2_1	chr1:241756426-241803663	-	0.373187	0.00771088
H1F0-201	H1F0	ENST00000340857.3_1	chr22:38201100-38203443	+	0.373192	0.012731
MS4A1-201	MS4A1	ENST00000345732.8_1	chr11:60223282-60238225	+	0.373497	0.0225468
SHPRH-211	SHPRH	ENST00000629427.2_1	chr6:146205952-146285233	-	0.37359	0.000169504
ZNF330-201	ZNF330	ENST00000262990.8_1	chr4:142142041-142155851	+	0.373661	0.0489407
SPIN3-205	SPIN3	ENST00000638289.1_1	chrX:57017375-57021988	-	0.373772	0.0260706
ACTR2-201	ACTR2	ENST00000260641.9_1	chr2:65454887-65498387	+	0.37388	0.0168468
EFR3A-201	EFR3A	ENST00000254624.9_3	chr8:132916335-133025889	+	0.374086	0.0348245
RABGAP1L-208	RABGAP1L	ENST00000392064.6_2	chr1:174846578-174964438	+	0.374282	0.0335153
SH3BGRL3-201	SH3BGRL3	ENST00000270792.9_1	chr1:26605667-26608013	+	0.37443	0.0464196
RPL5-201	RPL5	ENST00000315741.5_1	chr1:93297666-93303026	+	0.374455	0.0430302
HSF1-204	HSF1	ENST00000528838.5_1	chr8:145515280-145538385	+	0.374592	0.0240056
MPP6-201	MPP6	ENST00000222644.9_1	chr7:24612965-24733812	+	0.374751	0.00705127
CLINT1-206	CLINT1	ENST00000523094.5_2	chr5:157212751-157286153	-	0.37483	0.0437725
LGMN-202	LGMN	ENST00000393218.6_1	chr14:93170189-93215024	-	0.375066	0.0173695
PCSK6-216	PCSK6	ENST00000615296.4_1	chr15:101886947-102029900	-	0.375133	0.0237494
GSTM4-204	GSTM4	ENST00000369836.8_1	chr1:110198703-110204322	+	0.375359	0.0338351
AKAP11-201	AKAP11	ENST00000025301.3_1	chr13:42846289-42897403	+	0.375674	0.00616873
LPIN2-201	LPIN2	ENST00000261596.8_1	chr18:2916992-3011945	-	0.375752	0.0364991
NOTCH2-207	NOTCH2	ENST00000602566.5_1	chr1:120535404-120596839	-	0.376095	0.0182155
LARP7-210	LARP7	ENST00000509061.5_2	chr4:113558282-113578742	+	0.376104	0.00575225
G3BP2-201	G3BP2	ENST00000357854.7_1	chr4:76569573-76598585	-	0.37629	0.0275345
ZFAND6-205	ZFAND6	ENST00000558272.5_1	chr15:80364932-80414092	+	0.376485	0.0107022
HABP4-201	HABP4	ENST00000375249.4_1	chr9:99212487-99253618	+	0.376501	0.0391758
UBE2N-201	UBE2N	ENST00000318066.6_1	chr12:93799466-93836038	-	0.377106	0.0354541
ESD-202	ESD	ENST00000378720.7_1	chr13:47345391-47371367	-	0.377253	0.0207599
MPL-202	MPL	ENST00000413998.7_2	chr1:43803520-43818443	+	0.377602	0.0306708
PATL2-201	PATL2	ENST00000434130.5_2	chr15:44957931-44969086	-	0.377676	0.00726173
RAB8B-201	RAB8B	ENST00000321437.8_1	chr15:63481668-63559981	+	0.377792	0.0363856
CLU-202	CLU	ENST00000405140.7_2	chr8:27455325-27468948	-	0.377984	0.0221755
RPL18-202	RPL18	ENST00000546623.5_1	chr19:49118590-49121054	-	0.378239	0.0415688
MCMBP-201	MCMBP	ENST00000360003.7_1	chr10:121588916-121632266	-	0.378257	0.0225191
PLEKHB2-201	PLEKHB2	ENST00000234115.10_1	chr2:131862517-131907425	+	0.378269	0.0267779
TAB1-201	TAB1	ENST00000216160.10_1	chr22:39795746-39827887	+	0.378422	0.0238055
RPL5-202	RPL5	ENST00000370321.7_1	chr1:93297582-93307481	+	0.378453	0.0116021
TRIM38-201	TRIM38	ENST00000357085.4_2	chr6:25963030-25991454	+	0.378527	0.0483956
NDUFA8-201	NDUFA8	ENST00000373768.3_1	chr9:124906337-124922098	-	0.378664	0.0173582
FARS2-202	FARS2	ENST00000324331.10_1	chr6:5261277-5771662	+	0.378788	0.00875376
HLA-DQB1-204	HLA-DQB1	ENST00000399084.5_2	chr6:32627244-32636160	-	0.378789	0.0377334
MFSD1-202	MFSD1	ENST00000392813.8_1	chr3:158519715-158547507	+	0.379154	0.0093066
MED30-201	MED30	ENST00000297347.7_1	chr8:118532952-118552501	+	0.379199	0.013393
CDC23-202	CDC23	ENST00000394886.6_1	chr5:137523337-137549032	-	0.379332	0.00827378
GOLT1B-201	GOLT1B	ENST00000229314.9_2	chr12:21654749-21671342	+	0.379372	0.0426735
LAMP2-201	LAMP2	ENST00000200639.8_2	chrX:119564681-119603161	-	0.379821	0.0144221
MRPL34-201	MRPL34	ENST00000252602.1_3	chr19:17416477-17417652	+	0.37988	0.0297708
SURF1-201	SURF1	ENST00000371974.7_2	chr9:136218610-136223361	-	0.38022	0.0150436
MBD4-203	MBD4	ENST00000429544.6_1	chr3:129149787-129158872	-	0.380317	0.0177388
BCL2L2-201	BCL2L2	ENST00000250405.9_2	chr14:23775971-23780968	+	0.380359	0.0430934
ETNK1-201	ETNK1	ENST00000266517.8_4	chr12:22778009-22843599	+	0.380787	0.0160143
UPF2-201	UPF2	ENST00000356352.6_1	chr10:11962021-12077896	-	0.381285	0.0308493
YOD1-201	YOD1	ENST00000315927.8_1	chr1:207217194-207224422	-	0.381375	0.0104915
RHOBTB3-201	RHOBTB3	ENST00000379982.7_1	chr5:95066879-95132071	+	0.381501	0.0466974
IL6ST-206	IL6ST	ENST00000381298.6_1	chr5:55230923-55290821	-	0.381626	0.0331927
SRC-201	SRC	ENST00000358208.8_1	chr20:36011007-36033835	+	0.381668	0.0303164
TMF1-201	TMF1	ENST00000398559.6_1	chr3:69068978-69101454	-	0.382238	0.0306398
ARPC5-201	ARPC5	ENST00000294742.6_1	chr1:183595593-183604892	-	0.382268	0.0213607
CYB5R4-202	CYB5R4	ENST00000369681.9_1	chr6:84569362-84677143	+	0.382339	0.0182209
SEPHS1-201	SEPHS1	ENST00000327347.9_1	chr10:13359424-13390297	-	0.382358	0.00197902
NSF-201	NSF	ENST00000398238.8_1	chr17:44668035-44834830	+	0.382406	0.0101009
ABHD10-201	ABHD10	ENST00000273359.7_1	chr3:111697882-111712210	+	0.382537	0.00864999
GNAQ-201	GNAQ	ENST00000286548.8_1	chr9:80331003-80646374	-	0.382577	0.0175085
C8orf59-207	C8orf59	ENST00000611854.4_1	chr8:86126738-86129931	-	0.382891	0.0206889
PRKAR1A-211	PRKAR1A	ENST00000586397.5_1	chr17:66510962-66526805	+	0.383344	0.0108376
METTL3-201	METTL3	ENST00000298717.8_1	chr14:21966282-21979517	-	0.383385	0.013307
CPNE1-207	CPNE1	ENST00000414664.5_2	chr20:34218905-34252838	-	0.383394	0.0429833
SERPINE1-201	SERPINE1	ENST00000223095.4_1	chr7:100770370-100782547	+	0.383533	0.0149491
TOP2A-201	TOP2A	ENST00000423485.5_1	chr17:38544768-38574202	-	0.383555	0.025127
LNPEP-201	LNPEP	ENST00000231368.9_1	chr5:96271168-96373219	+	0.383599	0.0472201
ME2-201	ME2	ENST00000321341.10_2	chr18:48405104-48480627	+	0.383605	0.00391177
FIBP-202	FIBP	ENST00000357519.8_1	chr11:65651392-65656010	-	0.383778	0.0129347
GIMAP8-201	GIMAP8	ENST00000307271.3_1	chr7:150147718-150176480	+	0.383793	0.0146888
SETX-201	SETX	ENST00000224140.5_1	chr9:135136743-135230372	-	0.383885	0.017882
TNS3-201	TNS3	ENST00000311160.13_1	chr7:47314752-47621742	-	0.383958	0.00313308
MYL6-209	MYL6	ENST00000548293.5_3	chr12:56552180-56554729	+	0.384054	0.0237488
UBR1-201	UBR1	ENST00000290650.8_1	chr15:43235095-43398299	-	0.384098	0.0165433
SRP14-204	SRP14	ENST00000558720.5_1	chr15:40328243-40331251	-	0.384388	0.0447246
AP2B1-211	AP2B1	ENST00000610402.4_1	chr17:33914341-34050936	+	0.384622	0.0262048
TMEM91-213	TMEM91	ENST00000546362.5_1	chr19:41884373-41889982	+	0.384894	0.0135695
NPAT-201	NPAT	ENST00000278612.8_1	chr11:108027942-108093369	-	0.385116	0.010439
CNOT7-211	CNOT7	ENST00000523917.5_1	chr8:17089079-17104387	-	0.385237	0.012
IL16-203	IL16	ENST00000394652.6_1	chr15:81589254-81601424	+	0.385279	0.015081
RAB18-201	RAB18	ENST00000356940.10_1	chr10:27793197-27831143	+	0.385356	0.00350307
C14orf166-201	C14orf166	ENST00000261700.7_1	chr14:52456193-52477409	+	0.385365	0.00325304
MFSD2B-201	MFSD2B	ENST00000338315.5_2	chr2:24232951-24249645	+	0.385452	0.0155823
RNGTT-202	RNGTT	ENST00000369485.8_1	chr6:89319991-89673440	-	0.385474	0.00546586
KLHL6-201	KLHL6	ENST00000341319.7_1	chr3:183205319-183273477	-	0.385553	0.0315628
PDGFA-204	PDGFA	ENST00000405692.2_3	chr7:551994-559933	-	0.385638	0.0210742
EIF4G3-212	EIF4G3	ENST00000602326.5_1	chr1:21132976-21503343	-	0.385743	0.0455754
WDR61-201	WDR61	ENST00000267973.6_3	chr15:78575577-78592136	-	0.385748	0.0379127
COQ5-201	COQ5	ENST00000288532.10_1	chr12:120941077-120966985	-	0.38593	0.0175439
UBASH3B-201	UBASH3B	ENST00000284273.5_1	chr11:122526383-122685181	+	0.38603	0.0196205
KIDINS220-201	KIDINS220	ENST00000256707.7_2	chr2:8868987-8977755	-	0.386151	0.0105107
VEGFC-202	VEGFC	ENST00000618562.1_1	chr4:177604689-177713881	-	0.386718	0.0387268
DCAF16-201	DCAF16	ENST00000382247.5_1	chr4:17802278-17812381	-	0.386737	0.0477874
ABLIM3-211	ABLIM3	ENST00000517451.5_1	chr5:148622911-148638020	+	0.386852	0.0091716
ANAPC5-208	ANAPC5	ENST00000535482.1_1	chr12:121746161-121769194	-	0.386886	0.013832
DMTN-214	DMTN	ENST00000519907.5_2	chr8:21916734-21940035	+	0.386984	0.0392675
MOB3C-202	MOB3C	ENST00000319928.7_1	chr1:47073387-47082563	-	0.387113	0.0434776
PRKAR1A-210	PRKAR1A	ENST00000585981.5_2	chr17:66509023-66525133	+	0.387156	0.0335255
VPREB3-201	VPREB3	ENST00000248948.3_1	chr22:24094930-24096655	-	0.387185	0.0321258
UBR3-201	UBR3	ENST00000272793.9_1	chr2:170683968-170940641	+	0.387314	0.00478013
ARHGAP25-201	ARHGAP25	ENST00000409030.7_1	chr2:69001933-69053965	+	0.387354	0.0427662
PTPRJ-201	PTPRJ	ENST00000418331.6_1	chr11:48002113-48189670	+	0.387464	0.0395609
GFI1B-201	GFI1B	ENST00000339463.7_1	chr9:135820938-135867074	+	0.387508	0.0408162
IARS-202	IARS	ENST00000375643.7_1	chr9:94972489-95055982	-	0.387518	0.0314149
PSMA4-201	PSMA4	ENST00000044462.11_1	chr15:78832755-78844761	+	0.38758	0.0430444
MAPRE2-201	MAPRE2	ENST00000300249.9_1	chr18:32621324-32723434	+	0.387595	0.0346788
POLD4-205	POLD4	ENST00000529704.5_1	chr11:67118248-67121050	-	0.387627	0.00641188
MTHFR-205	MTHFR	ENST00000376592.6_3	chr1:11845780-11865470	-	0.387719	0.0158012
TRAPPC2-206	TRAPPC2	ENST00000518847.1_1	chrX:13734669-13752752	-	0.387723	0.00778356
UBE2O-201	UBE2O	ENST00000319380.11_3	chr17:74385532-74449288	-	0.387813	0.0205346
MBNL1-224	MBNL1	ENST00000545754.5_1	chr3:152017194-152183568	+	0.387818	0.0436021
DBNL-217	DBNL	ENST00000468694.5_2	chr7:44084310-44101236	+	0.388108	0.0449859
PARVG-206	PARVG	ENST00000444313.7_2	chr22:44576770-44604349	+	0.388343	0.0194101
AC040977.1-201	AC040977.1	ENST00000593646.1	chr17:6915928-6917755	-	0.38877	0.0281337
TAF11-201	TAF11	ENST00000361288.8_1	chr6:34845555-34855866	-	0.388824	0.0314602
RAB27A-202	RAB27A	ENST00000396307.6_1	chr15:55495164-55562592	-	0.388851	0.0393773
TBPL1-201	TBPL1	ENST00000237264.8_2	chr6:134274333-134311570	+	0.388908	0.00755964
MEIS1-202	MEIS1	ENST00000398506.6_1	chr2:66664525-66800461	+	0.389455	0.0189173
MXI1-201	MXI1	ENST00000239007.11_3	chr10:111985751-112046264	+	0.389552	0.0341238
BNIP3-201	BNIP3	ENST00000368636.8_2	chr10:133779959-133795517	-	0.389723	0.0219142
CMTM3-214	CMTM3	ENST00000567572.5_2	chr16:66638567-66647783	+	0.389887	0.0243543
MBNL1-212	MBNL1	ENST00000464596.5_3	chr3:152017987-152177091	+	0.389983	0.0232785
LAPTM4B-201	LAPTM4B	ENST00000445593.6_1	chr8:98787285-98865241	+	0.390013	0.026617
VWA8-203	VWA8	ENST00000379310.7_2	chr13:42140973-42535220	-	0.390065	0.00902035
TVP23B-201	TVP23B	ENST00000307767.12_1	chr17:18684308-18710027	+	0.390146	0.0358568
TBPL1-203	TBPL1	ENST00000367871.5_2	chr6:134274333-134305861	+	0.390202	0.0334624
SELENOW-202	SELENOW	ENST00000593892.5_2	chr19:48281934-48287821	+	0.39044	0.0360112
RPL11-202	RPL11	ENST00000443624.5_1	chr1:24019099-24021885	+	0.390622	0.0322567
ATE1-201	ATE1	ENST00000224652.10_4	chr10:123499936-123687578	-	0.390737	0.0186103
RNF167-211	RNF167	ENST00000575111.5_2	chr17:4843676-4848486	+	0.391036	0.0322167
FOXJ3-204	FOXJ3	ENST00000372572.5_2	chr1:42642210-42800636	-	0.391046	0.0296593
LTBP1-208	LTBP1	ENST00000422669.1_1	chr2:33526597-33588488	+	0.391083	0.0221925
BORCS6-201	BORCS6	ENST00000389017.5_1	chr17:8091651-8094225	-	0.391105	0.0273966
TAGAP-202	TAGAP	ENST00000338313.5_1	chr6:159459944-159466050	-	0.391283	0.0225867
ORAI3-201	ORAI3	ENST00000318663.4_1	chr16:30960387-30966259	+	0.391284	0.0339312
PGM1-202	PGM1	ENST00000371084.7_1	chr1:64058947-64125916	+	0.391339	0.0280669
FCRL1-203	FCRL1	ENST00000368176.7_1	chr1:157764651-157789895	-	0.391346	0.0114921
CNR2-201	CNR2	ENST00000374472.4_1	chr1:24197016-24239852	-	0.391681	0.00181445
GTDC1-211	GTDC1	ENST00000437114.5_1	chr2:144899449-144993304	-	0.391696	0.0479777
TSPAN2-202	TSPAN2	ENST00000369516.6_1	chr1:115590632-115632085	-	0.391911	0.0145293
UBXN4-201	UBXN4	ENST00000272638.13_1	chr2:136499189-136542625	+	0.392191	0.0458491
PF4-201	PF4	ENST00000296029.3_1	chr4:74846794-74847841	-	0.392322	0.0247696
SSBP3-216	SSBP3	ENST00000610401.4_1	chr1:54691106-54872068	-	0.392376	0.0375579
ATP9B-202	ATP9B	ENST00000426216.6_1	chr18:76829394-77138283	+	0.392976	0.0405048
LIPH-201	LIPH	ENST00000296252.8_1	chr3:185224050-185270401	-	0.393047	0.00829726
P4HA1-201	P4HA1	ENST00000263556.3_1	chr10:74766982-74856732	-	0.393221	0.0197845
VKORC1L1-201	VKORC1L1	ENST00000360768.3_1	chr7:65338254-65424550	+	0.393233	0.00787819
VIL1-201	VIL1	ENST00000248444.9_1	chr2:219283815-219318018	+	0.393869	0.016442
ANK1-205	ANK1	ENST00000347528.8_2	chr8:41510739-41655140	-	0.394192	0.0244518
SDHC-202	SDHC	ENST00000367975.6_1	chr1:161284047-161345130	+	0.39437	0.000339605
ST6GAL1-211	ST6GAL1	ENST00000448044.5_1	chr3:186739644-186796341	+	0.394398	0.00674487
MID1IP1-201	MID1IP1	ENST00000336949.6_1	chrX:38662986-38665790	+	0.394425	0.0138878
STK24-204	STK24	ENST00000418038.5_3	chr13:99107675-99116039	-	0.394457	0.0422293
ZNF395-201	ZNF395	ENST00000344423.9_1	chr8:28203102-28243983	-	0.394836	0.0429682
DDX1-202	DDX1	ENST00000381341.6_1	chr2:15731302-15771235	+	0.394949	0.04525
NUP58-202	NUP58	ENST00000381736.7_1	chr13:25875662-25916554	+	0.395057	0.00177975
MRPS18B-206	MRPS18B	ENST00000259873.4_1	chr6:30585486-30594172	+	0.395161	0.0206506
BCL11A-201	BCL11A	ENST00000335712.10_2	chr2:60684333-60780633	-	0.395181	0.00997022
EED-201	EED	ENST00000263360.10_1	chr11:85955586-85989778	+	0.395198	0.0248026
CDKL1-203	CDKL1	ENST00000395834.5_1	chr14:50796122-50862617	-	0.395236	0.0413543
DNMT1-201	DNMT1	ENST00000340748.8_2	chr19:10244022-10305811	-	0.395319	0.0405202
NDUFB5-201	NDUFB5	ENST00000259037.7_1	chr3:179322490-179342285	+	0.395872	0.0454051
SIKE1-203	SIKE1	ENST00000369528.9_3	chr1:115312100-115323306	-	0.39589	0.0112853
ATG4C-201	ATG4C	ENST00000317868.8_1	chr1:63249806-63331184	+	0.395962	0.0163917
BIN1-211	BIN1	ENST00000409400.1_3	chr2:127805614-127864854	-	0.395963	0.0353959
TMBIM1-202	TMBIM1	ENST00000396809.6_1	chr2:219138924-219150657	-	0.395963	0.0263361
PLEK-201	PLEK	ENST00000234313.7_1	chr2:68592305-68624585	+	0.395998	0.00553397
SF3B1-211	SF3B1	ENST00000487698.5_2	chr2:198283520-198299803	-	0.396041	0.0198215
LRRC8D-206	LRRC8D	ENST00000527156.1_3	chr1:90308982-90399187	+	0.396372	0.0157233
HSBP1-201	HSBP1	ENST00000433866.6_1	chr16:83841448-83853342	+	0.396429	0.0285152
MKNK1-204	MKNK1	ENST00000371946.8_4	chr1:47023090-47069886	-	0.396459	0.0105417
PRDM4-201	PRDM4	ENST00000228437.9_1	chr12:108126643-108154937	-	0.396622	0.0155574
C1orf198-201	C1orf198	ENST00000366663.9_1	chr1:230972865-231004399	-	0.396656	0.0162206
RNASE6-201	RNASE6	ENST00000304677.2_1	chr14:21249210-21250626	+	0.396658	0.0143698
USP22-201	USP22	ENST00000261497.8_1	chr17:20902906-20946352	-	0.396811	0.0490138
FLNA-208	FLNA	ENST00000438732.2_1	chrX:153581664-153583257	-	0.396863	0.0402266
NBAS-201	NBAS	ENST00000281513.9_1	chr2:15307033-15701454	-	0.396931	0.0319066
FAM214A-208	FAM214A	ENST00000562351.2_1	chr15:52948250-52970757	-	0.397046	0.0157006
ID1-202	ID1	ENST00000376112.3_1	chr20:30193086-30194318	+	0.397685	0.0172603
UBE2E3-209	UBE2E3	ENST00000602710.5_1	chr2:181845851-181928168	+	0.397817	0.0405509
RNH1-203	RNH1	ENST00000397604.7_1	chr11:494515-507253	-	0.398257	0.035717
CWF19L1-201	CWF19L1	ENST00000354105.9_2	chr10:101992866-102027430	-	0.398612	0.0374609
ASB8-201	ASB8	ENST00000317697.7_1	chr12:48541571-48551378	-	0.398701	0.02396
IFRD1-217	IFRD1	ENST00000621379.4_1	chr7:112063199-112117255	+	0.398842	0.0407808
C19orf60-201	C19orf60	ENST00000358607.10_1	chr19:18699535-18703146	+	0.398872	0.0314701
DNAJC13-201	DNAJC13	ENST00000260818.10_1	chr3:132136370-132257876	+	0.399294	0.0401735
ZBTB8OS-208	ZBTB8OS	ENST00000468695.5_1	chr1:33086421-33116185	-	0.399302	0.0220716
TPST2-201	TPST2	ENST00000338754.8_2	chr22:26917949-26986127	-	0.399631	0.02803
MATR3-208	MATR3	ENST00000504045.5_1	chr5:138629407-138653402	+	0.400082	0.0323717
STRN3-202	STRN3	ENST00000357479.9_2	chr14:31364409-31495588	-	0.400488	0.0186873
GOLGA7-201	GOLGA7	ENST00000357743.8_1	chr8:41348173-41368499	+	0.400535	0.0415114
TMEM170B-201	TMEM170B	ENST00000379426.1_1	chr6:11538511-11583757	+	0.40059	0.0125505
HEATR1-203	HEATR1	ENST00000366582.7_1	chr1:236712305-236767804	-	0.400591	0.00994021
COIL-201	COIL	ENST00000240316.4_1	chr17:55015548-55038415	-	0.400631	0.0481312
LRRFIP2-201	LRRFIP2	ENST00000336686.8_1	chr3:37094381-37216055	-	0.400827	0.00893334
MGA-201	MGA	ENST00000219905.11_1	chr15:41952610-42062141	+	0.401169	0.00241014
SNAP23-208	SNAP23	ENST00000563830.2_1	chr15:42807435-42837554	+	0.401183	0.022363
SNAP23-201	SNAP23	ENST00000249647.7_1	chr15:42787458-42825259	+	0.401279	0.0436325
CD3G-206	CD3G	ENST00000532917.1_1	chr11:118215071-118225876	+	0.401716	0.00692229
EIF2AK3-201	EIF2AK3	ENST00000303236.7_1	chr2:88856261-88927094	-	0.401803	0.0106027
VWF-201	VWF	ENST00000261405.9_1	chr12:6058040-6233841	-	0.401984	0.03352
CDC16-204	CDC16	ENST00000360383.7_2	chr13:115000362-115038150	+	0.403119	0.0414618
GTF2E1-201	GTF2E1	ENST00000283875.5_1	chr3:120461579-120501916	+	0.403332	0.00220197
RCOR3-201	RCOR3	ENST00000367005.8_1	chr1:211433317-211489727	+	0.403354	0.0134258
PSMB6-201	PSMB6	ENST00000270586.7_1	chr17:4699439-4701798	+	0.404002	0.0310736
DNAJB6-210	DNAJB6	ENST00000453383.5_3	chr7:157130237-157160126	+	0.404081	0.0115272
EEF1E1-201	EEF1E1	ENST00000379715.9_1	chr6:8079628-8102811	-	0.404246	0.0363147
HENMT1-202	HENMT1	ENST00000370032.9_1	chr1:109190917-109204148	-	0.404252	0.00972407
MARCH6-201	2019-03-06	ENST00000274140.9_1	chr5:10353879-10440500	+	0.404609	0.0385505
GTF2I-203	GTF2I	ENST00000443166.5_1	chr7:74072357-74131386	+	0.404625	0.0332822
RTCA-203	RTCA	ENST00000370128.8_1	chr1:100731763-100758325	+	0.40481	0.0246852
TMOD3-201	TMOD3	ENST00000308580.11_1	chr15:52121827-52207922	+	0.405024	0.0361958
SLC35E1-208	SLC35E1	ENST00000595753.5_1	chr19:16660642-16683193	-	0.405117	0.0293134
MARCH1-202	2019-03-01	ENST00000339875.9_1	chr4:164448273-164534686	-	0.405302	0.0326041
SMIM1-201	SMIM1	ENST00000444870.6_1	chr1:3689352-3692546	+	0.405417	0.049092
TM6SF1-202	TM6SF1	ENST00000322019.13_4	chr15:83776159-83806111	+	0.405769	0.0237123
RPL23-206	RPL23	ENST00000479035.6_1	chr17:37004120-37010096	-	0.405911	0.0426196
DVL2-201	DVL2	ENST00000005340.9_1	chr17:7128660-7137864	-	0.406072	0.00467064
PMS2-201	PMS2	ENST00000265849.11_1	chr7:6012870-6048756	-	0.406097	0.00360217
TMX1-201	TMX1	ENST00000457354.6_1	chr14:51706886-51724264	+	0.406475	0.0183911
PUM2-204	PUM2	ENST00000403432.5_1	chr2:20451071-20550463	-	0.406507	0.0279379
NUP133-201	NUP133	ENST00000261396.5_1	chr1:229576007-229644088	-	0.406919	0.0461586
NADK2-203	NADK2	ENST00000397338.5_1	chr5:36192694-36241493	-	0.407025	0.0365369
TRAPPC11-201	TRAPPC11	ENST00000334690.10_1	chr4:184580420-184634745	+	0.407059	0.0178359
FAM162A-203	FAM162A	ENST00000477892.5_1	chr3:122103029-122131181	+	0.407146	0.0209629
SPCS2-201	SPCS2	ENST00000263672.10_3	chr11:74660292-74690076	+	0.407616	0.00872777
IRAK4-214	IRAK4	ENST00000613694.4_2	chr12:44152758-44183344	+	0.407694	0.0113703
MAP2K1-201	MAP2K1	ENST00000307102.9_1	chr15:66679155-66784650	+	0.407997	0.0329655
MS4A1-203	MS4A1	ENST00000524807.5_1	chr11:60223225-60229869	+	0.408566	0.0392612
PRKAR1A-213	PRKAR1A	ENST00000588178.5_1	chr17:66511264-66521097	+	0.408568	0.0190405
POLR3K-201	POLR3K	ENST00000293860.5_1	chr16:96407-103628	-	0.408804	0.0347174
DHX36-213	DHX36	ENST00000496811.5_4	chr3:153990335-154042286	-	0.408946	0.0225884
TNNC2-202	TNNC2	ENST00000372557.1_1	chr20:44451853-44462384	-	0.409171	0.0201179
MLLT3-203	MLLT3	ENST00000380338.8_1	chr9:20341663-20622542	-	0.40935	0.0163425
UAP1-201	UAP1	ENST00000271469.7_3	chr1:162531296-162569632	+	0.40989	0.0131541
MT-ND5-201	MT-ND5	ENST00000361567.2	chrM:12337-14148	+	0.410741	0.0309702
CNN2-207	CNN2	ENST00000565096.6_1	chr19:1026617-1039067	+	0.410899	0.0333008
CBLL1-205	CBLL1	ENST00000440859.7_1	chr7:107384142-107402112	+	0.410928	0.0229027
BFAR-201	BFAR	ENST00000261658.6_1	chr16:14726672-14763093	+	0.411279	0.019916
NSL1-202	NSL1	ENST00000366977.7_1	chr1:212910298-212965124	-	0.411642	0.0199284
EPOR-201	EPOR	ENST00000222139.10_1	chr19:11487881-11494988	-	0.411786	0.0162429
EXOC3-209	EXOC3	ENST00000512944.5_1	chr5:443273-467411	+	0.41193	0.0243887
UTP6-201	UTP6	ENST00000261708.8_1	chr17:30187918-30228784	-	0.412205	0.0186007
CLCN7-202	CLCN7	ENST00000382745.8_1	chr16:1494936-1525581	-	0.412354	0.00578267
HTT-201	HTT	ENST00000355072.9_1	chr4:3076408-3245686	+	0.412773	0.0265503
ELP6-201	ELP6	ENST00000296149.8_1	chr3:47537130-47555251	-	0.413186	0.00668227
CHORDC1-201	CHORDC1	ENST00000320585.10_1	chr11:89934328-89956532	-	0.41319	0.0125052
CTNNAL1-201	CTNNAL1	ENST00000325551.8_1	chr9:111704851-111775809	-	0.413383	0.0231014
DEDD2-205	DEDD2	ENST00000596251.5_1	chr19:42703511-42721868	-	0.413394	0.0460202
TNFSF13B-201	TNFSF13B	ENST00000375887.8_1	chr13:108922066-108960832	+	0.413809	0.0264881
PPM1L-205	PPM1L	ENST00000498165.5_1	chr3:160473996-160796695	+	0.414415	0.0124373
FOXN2-201	FOXN2	ENST00000340553.7_1	chr2:48541849-48606433	+	0.414654	0.0147241
PRKG1-203	PRKG1	ENST00000373980.8_1	chr10:52833934-54058110	+	0.414852	0.00934061
MYOF-202	MYOF	ENST00000359263.8_1	chr10:95066187-95241951	-	0.414869	0.00578007
ORC4-214	ORC4	ENST00000535373.5_1	chr2:148687966-148778316	-	0.414892	0.0409869
WASHC3-201	WASHC3	ENST00000240079.10_1	chr12:102406717-102455902	-	0.415549	0.0284236
VAMP7-201	VAMP7	ENST00000262640.11_1	chrX:155111038-155173433	+	0.416126	0.0346205
ZMYND8-204	ZMYND8	ENST00000355972.8_1	chr20:45837859-45985633	-	0.416282	0.048167
CPSF2-201	CPSF2	ENST00000298875.8_1	chr14:92588281-92638489	+	0.416878	0.00284858
ARHGEF6-201	ARHGEF6	ENST00000250617.6_1	chrX:135747706-135864247	-	0.41695	0.0450726
TTC7A-201	TTC7A	ENST00000319190.9_1	chr2:47168313-47303274	+	0.416959	0.0427958
FKBP1C-201	FKBP1C	ENST00000370659.1_2	chr6:63921351-63922929	+	0.416962	0.0340463
METTL9-202	METTL9	ENST00000396014.8_1	chr16:21610879-21667440	+	0.416978	0.036478
KCNK6-201	KCNK6	ENST00000263372.4_2	chr19:38810484-38822716	+	0.417281	0.0243753
MSL2-201	MSL2	ENST00000309993.2_1	chr3:135867764-135914688	-	0.417723	0.0423364
H3F3A-203	H3F3A	ENST00000366815.7_1	chr1:226250379-226259700	+	0.418086	0.0456112
MT-CO1-201	MT-CO1	ENST00000361624.2	chrM:5904-7445	+	0.41822	0.021889
SLC6A6-202	SLC6A6	ENST00000452775.1_1	chr3:14474178-14487324	+	0.418505	0.0307982
MICU1-201	MICU1	ENST00000361114.9_1	chr10:74127098-74385863	-	0.418706	0.0481785
PCBD2-204	PCBD2	ENST00000512783.5_1	chr5:134240810-134305350	+	0.418744	0.0305345
QKI-207	QKI	ENST00000453779.6_1	chr6:163835675-163991177	+	0.419118	0.0179548
RDX-201	RDX	ENST00000343115.8_1	chr11:110100175-110167447	-	0.419964	0.000766281
CCAR1-201	CCAR1	ENST00000265872.10_1	chr10:70480971-70552134	+	0.420041	0.0315765
XPO1-207	XPO1	ENST00000436018.1_1	chr2:61753606-61765761	-	0.420141	0.0372934
OXCT1-201	OXCT1	ENST00000196371.9_1	chr5:41730167-41870621	-	0.420239	0.0160509
RCHY1-201	RCHY1	ENST00000324439.9_1	chr4:76404247-76439895	-	0.420404	0.0200423
TMSB4X-204	TMSB4X	ENST00000451311.6_1	chrX:12993227-12995346	+	0.420444	0.0140925
GON4L-203	GON4L	ENST00000368331.5_1	chr1:155719453-155827086	-	0.420823	0.0144187
DUSP11-201	DUSP11	ENST00000272444.7_1	chr2:73989311-74007284	-	0.420917	0.0227905
RIPK2-201	RIPK2	ENST00000220751.4_1	chr8:90769975-90803291	+	0.421087	0.0210482
RBM27-201	RBM27	ENST00000265271.6_1	chr5:145583163-145668695	+	0.421147	0.0346334
GAS2L1-201	GAS2L1	ENST00000406549.7_1	chr22:29703013-29708774	+	0.421455	0.00310273
EDC3-201	EDC3	ENST00000315127.8_2	chr15:74922899-74988384	-	0.421458	0.0369542
SNX12-202	SNX12	ENST00000374274.7_3	chrX:70279096-70288273	-	0.421625	0.0376375
CAPNS1-204	CAPNS1	ENST00000587718.5_1	chr19:36631010-36641251	+	0.421721	0.0411846
TGFB1I1-203	TGFB1I1	ENST00000394863.7_3	chr16:31483380-31489279	+	0.422295	0.0425155
CNTLN-202	CNTLN	ENST00000380647.7_3	chr9:17134980-17503921	+	0.422529	0.0316391
ARID2-201	ARID2	ENST00000334344.10_1	chr12:46123448-46301823	+	0.422548	0.00836869
SMIM14-201	SMIM14	ENST00000295958.9_3	chr4:39547950-39640710	-	0.423053	0.0473833
ZDHHC4-202	ZDHHC4	ENST00000396706.2_1	chr7:6617136-6629005	+	0.423191	0.00774219
C11orf98-201	C11orf98	ENST00000524958.5_1	chr11:62430288-62432689	-	0.423286	0.0286474
AC117834.1-201	AC117834.1	ENST00000391681.1	chr8:93895865-93898013	+	0.42351	0.0276093
TACC1-223	TACC1	ENST00000522904.5_1	chr8:38614799-38693809	+	0.424021	0.0371556
BANP-223	BANP	ENST00000538234.5_2	chr16:87993477-88110921	+	0.424637	0.0180114
TOPBP1-201	TOPBP1	ENST00000260810.9_1	chr3:133319417-133380737	-	0.424723	0.0328199
RBM41-202	RBM41	ENST00000372487.5_1	chrX:106307650-106362030	-	0.424807	0.016022
CCDC117-201	CCDC117	ENST00000249064.8_1	chr22:29168662-29185283	+	0.424875	0.0477918
GFOD1-203	GFOD1	ENST00000379287.3_1	chr6:13358062-13487787	-	0.425049	2.59e-05
LCOR-205	LCOR	ENST00000421806.3_4	chr10:98592055-98755716	+	0.425494	0.0138053
LARP4-205	LARP4	ENST00000517559.5_2	chr12:50794891-50829335	+	0.425854	0.0401497
MPHOSPH9-220	MPHOSPH9	ENST00000606320.5_1	chr12:123638762-123717670	-	0.426055	0.0122917
ELP5-204	ELP5	ENST00000396628.6_2	chr17:7155605-7163259	+	0.42664	0.0492466
APPBP2-201	APPBP2	ENST00000083182.7_1	chr17:58520510-58603580	-	0.427082	0.0428376
PTP4A2-201	PTP4A2	ENST00000457805.6_1	chr1:32374135-32384969	-	0.427296	0.0203174
TIRAP-202	TIRAP	ENST00000392679.5_2	chr11:126152982-126164828	+	0.427373	0.0106
ABCB10-201	ABCB10	ENST00000344517.4_1	chr1:229652329-229694442	-	0.427738	0.0107698
HLA-E-201	HLA-E	ENST00000376630.4_1	chr6:30457244-30461982	+	0.428097	0.00157621
NSMAF-201	NSMAF	ENST00000038176.7_1	chr8:59496063-59572403	-	0.428315	0.0177656
CMAS-201	CMAS	ENST00000229329.6_1	chr12:22199108-22218597	+	0.42883	0.0401219
AFF3-202	AFF3	ENST00000409236.6_1	chr2:100161881-100721178	-	0.429391	0.0370117
SUMF1-201	SUMF1	ENST00000272902.9_1	chr3:4402830-4508965	-	0.429439	0.0128926
TPR-201	TPR	ENST00000367478.8_1	chr1:186280784-186344457	-	0.430445	0.00957191
COPS5-201	COPS5	ENST00000357849.8_1	chr8:67955314-67974552	-	0.430532	0.0332001
BLVRA-201	BLVRA	ENST00000265523.8_1	chr7:43798279-43846938	+	0.430654	0.0102497
AMIGO2-201	AMIGO2	ENST00000266581.4_1	chr12:47469490-47473648	-	0.430717	0.00803999
MIPEP-201	MIPEP	ENST00000382172.3_1	chr13:24304328-24463558	-	0.430767	0.015713
ZNF687-201	ZNF687	ENST00000324048.9_1	chr1:151254788-151264379	+	0.430975	0.0429299
PPP5C-201	PPP5C	ENST00000012443.8_1	chr19:46850251-46894109	+	0.431447	0.0134969
CNOT2-235	CNOT2	ENST00000552151.2_1	chr12:70704743-70725478	+	0.432266	0.0221031
SRBD1-201	SRBD1	ENST00000263736.4_1	chr2:45615819-45838420	-	0.432375	0.0409788
SSR1-201	SSR1	ENST00000244763.8_1	chr6:7281376-7313440	-	0.432549	0.00748454
ACADM-202	ACADM	ENST00000370841.8_1	chr1:76190036-76229364	+	0.432764	0.0176029
EIF2AK4-201	EIF2AK4	ENST00000263791.9_1	chr15:40226354-40327791	+	0.433043	0.00441535
HELLS-205	HELLS	ENST00000394036.5_2	chr10:96305679-96361855	+	0.43305	0.00839924
CSH2-203	CSH2	ENST00000392886.6_2	chr17:61949372-61951126	-	0.433309	0.00589492
NEK1-201	NEK1	ENST00000439128.6_2	chr4:170314426-170533763	-	0.433687	0.00272259
MAPK1-201	MAPK1	ENST00000215832.10_1	chr22:22108789-22221919	-	0.4338	0.027508
HTATIP2-201	HTATIP2	ENST00000419348.6_2	chr11:20385289-20405328	+	0.433949	0.0286639
EFNB1-201	EFNB1	ENST00000204961.4_1	chrX:68048840-68061990	+	0.434153	0.0232897
H2BFS-201	H2BFS	ENST00000599962.1_1	chr21:44985070-44985529	+	0.434451	0.0483905
KCTD9-201	KCTD9	ENST00000221200.8_1	chr8:25285363-25315983	-	0.434633	0.0483086
RPL10-218	RPL10	ENST00000618723.4_1	chrX:153626571-153630680	+	0.434648	0.0333301
COMMD1-201	COMMD1	ENST00000311832.5_1	chr2:62132782-62363382	+	0.435229	0.0173973
RIOK2-205	RIOK2	ENST00000511012.1_1	chr5:96500663-96503423	-	0.43537	0.0240368
TSN-201	TSN	ENST00000389682.7_1	chr2:122513109-122525429	+	0.435407	0.0127397
LHFPL2-201	LHFPL2	ENST00000380345.6_1	chr5:77781040-77944648	-	0.435467	0.00650059
TPGS2-201	TPGS2	ENST00000334295.8_1	chr18:34374069-34409158	-	0.435685	0.0143566
ADD1-206	ADD1	ENST00000398129.5_1	chr4:2877623-2931803	+	0.435712	0.0435227
TMA16-201	TMA16	ENST00000358572.9_2	chr4:164415613-164441691	+	0.436037	0.0435806
PIP5K1A-201	PIP5K1A	ENST00000349792.9_1	chr1:151171027-151222012	+	0.436075	0.029518
CD38-201	CD38	ENST00000226279.7_1	chr4:15779901-15854853	+	0.436102	0.0399513
LACTB-201	LACTB	ENST00000261893.8_1	chr15:63413999-63434260	+	0.43612	0.0184899
NDUFC2-204	NDUFC2	ENST00000528164.1_3	chr11:77783910-77790907	-	0.436607	0.0276267
FHL1-205	FHL1	ENST00000370690.7_1	chrX:135229624-135293518	+	0.436898	0.0265291
STIP1-210	STIP1	ENST00000540887.1_1	chr11:63967724-63971615	+	0.43701	0.0416775
DUSP12-201	DUSP12	ENST00000367943.4_1	chr1:161719560-161726952	+	0.43707	0.0367898
PNPLA8-203	PNPLA8	ENST00000422087.5_1	chr7:108112071-108166638	-	0.43793	0.0189901
PPP3CC-206	PPP3CC	ENST00000522000.1_1	chr8:22298878-22333180	+	0.438014	0.0241778
CMAS-205	CMAS	ENST00000538498.1_1	chr12:22208053-22213840	+	0.438152	0.0345982
RLIM-201	RLIM	ENST00000332687.10_1	chrX:73805052-73834452	-	0.438193	0.0494046
ELMO1-201	ELMO1	ENST00000310758.8_1	chr7:36893966-37488852	-	0.438304	0.0441677
PCYT1A-201	PCYT1A	ENST00000292823.6_1	chr3:195961239-196014584	-	0.438399	0.0427472
CHD4-211	CHD4	ENST00000544484.5_1	chr12:6679249-6716534	-	0.438489	0.0120816
PARP6-220	PARP6	ENST00000569795.5_1	chr15:72533522-72564962	-	0.438524	0.0125381
SARNP-203	SARNP	ENST00000552080.1_1	chr12:56154208-56211493	-	0.438536	0.0444535
ZDHHC12-204	ZDHHC12	ENST00000452105.5_3	chr9:131483676-131486400	-	0.439041	0.0319105
ATAD2-201	ATAD2	ENST00000287394.9_1	chr8:124332090-124408705	-	0.439055	0.044523
MAZ-214	MAZ	ENST00000568544.5_1	chr16:29819372-29822446	+	0.439227	0.0304348
STARD3-201	STARD3	ENST00000336308.9_1	chr17:37793318-37819737	+	0.439256	0.01957
SLC16A7-201	SLC16A7	ENST00000261187.8_1	chr12:60083118-60183636	+	0.439369	0.00573394
SEPT7-216	2019-09-07	ENST00000635172.1_1	chr7:35840542-35903223	+	0.43948	0.0388121
AAR2-202	AAR2	ENST00000373932.3_1	chr20:34824407-34844855	+	0.440096	0.00600306
ZDHHC2-201	ZDHHC2	ENST00000262096.12_1	chr8:17013538-17082308	+	0.440132	0.0314552
ELAVL1-201	ELAVL1	ENST00000407627.6_1	chr19:8023463-8070492	-	0.440295	0.0376621
MCTP1-207	MCTP1	ENST00000506568.8_3	chr5:94202927-94275880	-	0.440434	0.00224257
TRAPPC10-201	TRAPPC10	ENST00000291574.8_1	chr21:45432200-45526433	+	0.440536	0.0380282
C8orf59-213	C8orf59	ENST00000619594.4_1	chr8:86126311-86132603	-	0.440677	0.0112236
MBNL1-216	MBNL1	ENST00000478535.1_1	chr3:152132847-152180948	+	0.4407	0.00887838
AMN1-201	AMN1	ENST00000281471.10_1	chr12:31824071-31882108	-	0.440971	0.0365132
IPCEF1-206	IPCEF1	ENST00000517438.5_3	chr6:154521152-154567990	-	0.441223	0.0294822
CAB39-202	CAB39	ENST00000409788.7_1	chr2:231578263-231683465	+	0.441248	0.0153688
CARNMT1-202	CARNMT1	ENST00000376834.7_1	chr9:77595936-77643310	-	0.441277	0.0261582
C10orf76-202	C10orf76	ENST00000370033.8_1	chr10:103605356-103815950	-	0.441627	0.0334677
ARNT-212	ARNT	ENST00000515192.5_1	chr1:150784157-150849184	-	0.441828	0.00802648
CERKL-206	CERKL	ENST00000410087.7_3	chr2:182401403-182521834	-	0.442498	0.0245128
PTBP1-203	PTBP1	ENST00000356948.10_3	chr19:797075-812327	+	0.442579	0.00181739
SSR4-202	SSR4	ENST00000370085.3_2	chrX:153060129-153063953	+	0.4429	0.0355237
CRBN-204	CRBN	ENST00000450014.1_1	chr3:3209114-3221358	-	0.443306	0.0190542
SLF1-201	SLF1	ENST00000265140.9_1	chr5:93954052-94033326	+	0.443315	0.0304373
ZC3H13-201	ZC3H13	ENST00000242848.8_2	chr13:46528600-46626881	-	0.443853	0.044991
ZNF430-201	ZNF430	ENST00000261560.9_1	chr19:21203426-21242856	+	0.443928	0.0145901
SNX30-201	SNX30	ENST00000374232.7_1	chr9:115513118-115637267	+	0.444002	0.015961
MIF4GD-214	MIF4GD	ENST00000618645.4_2	chr17:73262313-73266329	-	0.44408	0.0143428
SRCAP-203	SRCAP	ENST00000411466.6_3	chr16:30709530-30715630	+	0.444295	0.0400348
IGHD-202	IGHD	ENST00000613640.1_1	chr14:106304737-106312011	-	0.444392	0.0296764
CISD2-201	CISD2	ENST00000273986.8_1	chr4:103790135-103810399	+	0.444665	0.0271967
MRPL45-203	MRPL45	ENST00000613675.4_1	chr17:36452989-36479101	+	0.444705	0.0101304
PITPNM2-202	PITPNM2	ENST00000320201.8_1	chr12:123468027-123594975	-	0.444879	0.0217613
ZUFSP-202	ZUFSP	ENST00000368576.7_1	chr6:116956781-116989957	-	0.444903	0.0130243
EWSR1-206	EWSR1	ENST00000397938.6_1	chr22:29664007-29696515	+	0.446158	0.0220532
FAM172A-201	FAM172A	ENST00000395965.7_2	chr5:92953775-93447340	-	0.446177	0.0405987
KPNA6-201	KPNA6	ENST00000373625.7_1	chr1:32573639-32642169	+	0.446266	0.00754814
FCRL2-201	FCRL2	ENST00000361516.7_1	chr1:157715523-157746912	-	0.446298	0.0360023
TBC1D3-202	TBC1D3	ENST00000537432.1	chr17:36337717-36358166	-	0.446505	0.0140247
PDCL3-201	PDCL3	ENST00000264254.10_1	chr2:101179152-101193197	+	0.446505	0.0363038
TACC1-216	TACC1	ENST00000521642.5_1	chr8:38614757-38688695	+	0.446757	0.0242848
ZNF106-201	ZNF106	ENST00000263805.8_1	chr15:42705021-42749730	-	0.446888	0.00774206
MSL3-202	MSL3	ENST00000337339.6_1	chrX:11776356-11786096	+	0.446978	0.0117058
GUK1-201	GUK1	ENST00000312726.8_1	chr1:228327991-228336647	+	0.447018	0.0203634
PPP1R16B-201	PPP1R16B	ENST00000299824.5_1	chr20:37434348-37551667	+	0.447381	0.0469181
PPP2R1B-206	PPP2R1B	ENST00000527614.5_1	chr11:111608605-111637151	-	0.447625	0.0144192
HGD-210	HGD	ENST00000494453.1_1	chr3:120352181-120365182	-	0.447837	0.0112297
CCDC6-201	CCDC6	ENST00000263102.6_1	chr10:61548521-61666414	-	0.447946	0.0268791
SON-203	SON	ENST00000381679.8_1	chr21:34915371-34931362	+	0.448001	0.023956
FTSJ3-201	FTSJ3	ENST00000427159.6_1	chr17:61896793-61905031	-	0.448089	0.0187966
ATPIF1-202	ATPIF1	ENST00000465645.1_1	chr1:28562665-28564609	+	0.448349	0.0205463
NCBP1-202	NCBP1	ENST00000375147.7_1	chr9:100395908-100436030	+	0.448505	0.0205915
NOL9-201	NOL9	ENST00000377705.5_1	chr1:6581407-6614595	-	0.44853	0.0416503
MNAT1-201	MNAT1	ENST00000261245.8_1	chr14:61201480-61436671	+	0.448728	0.0359388
RAB7A-202	RAB7A	ENST00000464496.5_1	chr3:128514086-128526437	+	0.448815	0.00571299
KLHL24-211	KLHL24	ENST00000476808.1_1	chr3:183368145-183390796	+	0.448944	0.0362349
NDUFS1-201	NDUFS1	ENST00000233190.10_1	chr2:206979541-207024327	-	0.449082	0.00785731
USP34-205	USP34	ENST00000453734.1_2	chr2:61453923-61507468	-	0.44929	0.0334121
TRAPPC8-201	TRAPPC8	ENST00000283351.8_1	chr18:29409136-29523063	-	0.449396	0.0389121
PDRG1-201	PDRG1	ENST00000202017.5_1	chr20:30532145-30539895	-	0.44945	0.0329253
CDIPT-202	CDIPT	ENST00000561555.5_1	chr16:29869683-29873015	-	0.449718	0.029717
LAMTOR5-208	LAMTOR5	ENST00000614544.1_1	chr1:110943879-110950546	-	0.450272	0.0149989
PDK3-201	PDK3	ENST00000379162.8_1	chrX:24483338-24552542	+	0.450403	0.0370206
PRR7-202	PRR7	ENST00000502922.5_1	chr5:176873828-176883269	+	0.450861	0.0483561
CD1C-201	CD1C	ENST00000368170.7_1	chr1:158259576-158263420	+	0.450913	0.0169633
DNAJC21-202	DNAJC21	ENST00000382021.2_1	chr5:34929698-34959069	+	0.450947	0.0239009
LAT-205	LAT	ENST00000454369.6_1	chr16:28996444-29001770	+	0.451866	0.0244556
GPN2-202	GPN2	ENST00000374135.8_1	chr1:27202624-27216788	-	0.451914	0.0155356
CETP-201	CETP	ENST00000200676.7_1	chr16:56995762-57017757	+	0.451932	0.0343073
SNAPC3-202	SNAPC3	ENST00000380821.7_1	chr9:15422702-15464132	+	0.452014	0.0197066
RPS6KA3-201	RPS6KA3	ENST00000379565.7_1	chrX:20168029-20284958	-	0.452176	0.0251283
CAPN1-202	CAPN1	ENST00000524773.5_1	chr11:64949216-64979472	+	0.452366	0.0373072
MOB1B-202	MOB1B	ENST00000396051.2_1	chr4:71768095-71847959	+	0.452875	0.0236145
PCCA-202	PCCA	ENST00000376285.5_2	chr13:100741337-101182689	+	0.453166	0.00765537
THEM5-201	THEM5	ENST00000368817.9_1	chr1:151819739-151826173	-	0.453244	0.0152128
LRRC41-207	LRRC41	ENST00000617190.4_2	chr1:46743134-46769280	-	0.453527	0.00601602
QRSL1-202	QRSL1	ENST00000369046.8_1	chr6:107077453-107116292	+	0.45356	0.0404386
ZNF644-212	ZNF644	ENST00000621077.1_1	chr1:91403440-91405677	-	0.453625	0.0379877
DPP9-221	DPP9	ENST00000601130.5_1	chr19:4714173-4723854	-	0.453987	0.0312635
SLC9A3R2-204	SLC9A3R2	ENST00000563587.5_1	chr16:2079528-2088166	+	0.454022	0.0416938
DCAF5-202	DCAF5	ENST00000389997.10_1	chr14:69555921-69619700	-	0.454151	0.00913685
CASP8-203	CASP8	ENST00000323492.11_1	chr2:202125223-202152432	+	0.454389	0.0288842
LOX-201	LOX	ENST00000231004.4_1	chr5:121398890-121413980	-	0.455026	0.0431683
USP33-202	USP33	ENST00000370792.7_1	chr1:78177337-78225537	-	0.455086	0.0317297
DENND6A-201	DENND6A	ENST00000311128.9_1	chr3:57611184-57678816	-	0.455476	0.0325198
TRIQK-214	TRIQK	ENST00000521988.5_2	chr8:93895758-93978373	-	0.45561	0.0396039
SELP-202	SELP	ENST00000367786.6_3	chr1:169558752-169599314	-	0.455811	0.0256716
SMOX-201	SMOX	ENST00000278795.7_1	chr20:4129426-4168394	+	0.455823	0.0269567
EEF1D-207	EEF1D	ENST00000524624.5_1	chr8:144661906-144679585	-	0.456308	0.0468095
CIAPIN1-201	CIAPIN1	ENST00000394391.8_1	chr16:57462081-57481440	-	0.456323	0.0254188
RAB5B-201	RAB5B	ENST00000360299.9_1	chr12:56367795-56390467	+	0.456341	0.00132838
CRTC2-203	CRTC2	ENST00000368633.1_1	chr1:153920151-153931101	-	0.45651	0.0286549
AMPD3-203	AMPD3	ENST00000396554.7_1	chr11:10472228-10528565	+	0.45679	0.00520727
TTC9C-202	TTC9C	ENST00000316461.8_1	chr11:62496011-62506108	+	0.456998	0.0284101
PGGT1B-203	PGGT1B	ENST00000419445.5_1	chr5:114539709-114598569	-	0.457026	0.0186594
LONP2-201	LONP2	ENST00000285737.8_1	chr16:48278207-48391260	+	0.457385	0.0305278
NR1D2-201	NR1D2	ENST00000312521.8_1	chr3:23986751-24022109	+	0.457576	0.0158143
ZC3H13-204	ZC3H13	ENST00000464597.2_3	chr13:46584285-46594622	-	0.457825	0.0233145
GPX4-202	GPX4	ENST00000585362.6_3	chr19:1104414-1105760	+	0.457842	0.0329888
YTHDC1-205	YTHDC1	ENST00000507529.1_1	chr4:69181573-69184439	-	0.457899	0.0273028
PHF14-201	PHF14	ENST00000403050.7_1	chr7:11013499-11143282	+	0.458123	0.0440231
MAU2-201	MAU2	ENST00000262815.12_2	chr19:19431490-19469564	+	0.458763	0.0247651
WRN-201	WRN	ENST00000298139.5_1	chr8:30891317-31031285	+	0.459179	0.00244967
AKAP7-204	AKAP7	ENST00000431975.6_1	chr6:131456806-131604675	+	0.459724	0.0161142
HSPBP1-201	HSPBP1	ENST00000255631.9_1	chr19:55773599-55791728	-	0.46017	0.0275995
C1GALT1-205	C1GALT1	ENST00000436587.6_1	chr7:7222246-7288278	+	0.460413	0.0341015
THADA-206	THADA	ENST00000405006.8_3	chr2:43457991-43823113	-	0.460789	0.00220066
OPHN1-201	OPHN1	ENST00000355520.5_1	chrX:67262186-67653647	-	0.460879	0.0243111
SON-201	SON	ENST00000300278.8_1	chr21:34915370-34932973	+	0.461064	0.0373983
SNW1-205	SNW1	ENST00000555761.5_2	chr14:78184296-78227499	-	0.461656	0.0487265
SNX24-201	SNX24	ENST00000261369.8_1	chr5:122181144-122344907	+	0.462288	0.0261733
COX15-202	COX15	ENST00000370483.9_1	chr10:101471601-101491857	-	0.462326	0.00650738
STXBP5-204	STXBP5	ENST00000367481.7_2	chr6:147525561-147711612	+	0.462377	0.0180005
RGS3-232	RGS3	ENST00000620489.1_1	chr9:116356409-116360009	+	0.462434	0.0119218
CDC37-210	CDC37	ENST00000593124.1_2	chr19:10503936-10530797	-	0.462448	0.0298317
KIF11-201	KIF11	ENST00000260731.4_1	chr10:94353043-94415152	+	0.46246	0.0147123
RAP1B-224	RAP1B	ENST00000541216.1_1	chr12:69004805-69050417	+	0.462519	0.0279874
POLE4-205	POLE4	ENST00000483063.1_1	chr2:75185619-75197255	+	0.463179	0.0361455
SESTD1-203	SESTD1	ENST00000428443.7_1	chr2:179966419-180129517	-	0.463627	0.0377563
PAK2-201	PAK2	ENST00000327134.7_1	chr3:196466728-196559518	+	0.463817	0.0331301
NIPA2-201	NIPA2	ENST00000337451.7_1	chr15:23004684-23034408	-	0.464045	0.0105195
KXD1-205	KXD1	ENST00000595870.5_1	chr19:18672590-18679319	+	0.464161	0.0415924
HNRNPR-202	HNRNPR	ENST00000374612.5_1	chr1:23636279-23670815	-	0.464185	0.0479659
FAM177A1-207	FAM177A1	ENST00000554052.2_3	chr14:35515659-35519602	+	0.464265	0.00796432
TARS2-204	TARS2	ENST00000369064.7_1	chr1:150459893-150480078	+	0.464474	0.00786025
OSBP2-219	OSBP2	ENST00000535268.5_2	chr22:31277668-31303811	+	0.464682	0.036581
ZCCHC11-208	ZCCHC11	ENST00000470626.1_3	chr1:52991692-53018757	-	0.464796	0.0119216
EIF3K-214	EIF3K	ENST00000614624.4_1	chr19:39109722-39127595	+	0.464878	0.049544
CD84-206	CD84	ENST00000368054.7_1	chr1:160510888-160549263	-	0.464879	0.0466729
HPSE-202	HPSE	ENST00000405413.6_1	chr4:84213614-84256306	-	0.465272	0.0197555
OXTR-201	OXTR	ENST00000316793.7_1	chr3:8792094-8811303	-	0.465317	0.0134002
DNAJC16-210	DNAJC16	ENST00000616884.4_1	chr1:15853308-15898226	+	0.465492	0.0247389
FARSA-206	FARSA	ENST00000587981.1_1	chr19:13041121-13044525	-	0.465832	0.0280498
ATP8A1-201	ATP8A1	ENST00000264449.14_2	chr4:42410394-42659110	-	0.465888	0.0481333
DPF2-205	DPF2	ENST00000528416.5_1	chr11:65101225-65120720	+	0.466102	0.0199078
MRPL27-201	MRPL27	ENST00000225969.8_1	chr17:48445228-48450575	-	0.466207	0.0264286
SNX13-213	SNX13	ENST00000611725.4_1	chr7:17832466-17980091	-	0.466354	0.0376068
TMEM223-201	TMEM223	ENST00000307366.7_1	chr11:62557443-62559493	-	0.466624	0.00844849
MLXIP-009	MLXIP	ENST00000366272.2	chr12:122618868-122623488	+	0.467057	0.00708796
RNMT-202	RNMT	ENST00000383314.6_1	chr18:13726660-13764557	+	0.467175	0.00663719
SNCA-210	SNCA	ENST00000506691.1_2	chr4:90743503-90758227	-	0.467213	0.0290587
ZNF418-201	ZNF418	ENST00000396147.5_2	chr19:58433252-58446740	-	0.467257	0.00102672
HNRNPLL-207	HNRNPLL	ENST00000425682.1_1	chr2:38810985-38827168	-	0.467372	0.038633
FXN-201	FXN	ENST00000377270.7_1	chr9:71650175-71689129	+	0.467384	0.0135186
PIAS3-203	PIAS3	ENST00000393045.6_1	chr1:145575989-145586546	+	0.467724	0.021125
TRNAU1AP-201	TRNAU1AP	ENST00000373830.4_1	chr1:28879597-28905057	+	0.468005	0.0464004
FASTKD1-204	FASTKD1	ENST00000453153.6_2	chr2:170386259-170430383	-	0.468113	0.0037867
HACD2-201	HACD2	ENST00000383657.9_1	chr3:123210401-123304032	-	0.468175	0.0285367
RABGAP1L-206	RABGAP1L	ENST00000367688.3_1	chr1:174933905-174959622	+	0.468185	0.0285176
SECISBP2L-209	SECISBP2L	ENST00000559471.5_1	chr15:49280835-49338760	-	0.46841	0.0209722
FBXO33-201	FBXO33	ENST00000298097.7_1	chr14:39866873-39901704	-	0.468644	0.0401297
MS4A3-201	MS4A3	ENST00000278865.7_2	chr11:59824156-59838601	+	0.468719	0.0171124
SPICE1-201	SPICE1	ENST00000295872.8_1	chr3:113161565-113234003	-	0.468903	0.00542181
PIK3C3-210	PIK3C3	ENST00000589056.5_1	chr18:39617714-39631277	+	0.469086	0.049054
RNF122-201	RNF122	ENST00000256257.1_1	chr8:33405273-33424643	-	0.469134	0.0155837
SEC23A-201	SEC23A	ENST00000307712.10_1	chr14:39501124-39572732	-	0.469186	0.0164245
BUD31-201	BUD31	ENST00000222969.9_1	chr7:99006601-99017231	+	0.469225	0.0433234
REL-201	REL	ENST00000295025.12_1	chr2:61108656-61158745	+	0.469238	0.0429902
TNFAIP8-206	TNFAIP8	ENST00000504771.2_1	chr5:118690009-118735383	+	0.469324	0.035264
AP1M2-207	AP1M2	ENST00000590923.5_2	chr19:10683347-10697991	-	0.469466	0.0375126
ZNF318-201	ZNF318	ENST00000361428.2_4	chr6:43303808-43337181	-	0.469604	0.0425462
HACL1-201	HACL1	ENST00000321169.9_1	chr3:15602211-15643338	-	0.469612	0.0194952
QKI-215	QKI	ENST00000544823.5_1	chr6:163876248-163984493	+	0.469976	0.0493441
PURB-201	PURB	ENST00000395699.3_1	chr7:44915892-44924960	-	0.469992	0.0144861
INPP5F-201	INPP5F	ENST00000361976.6_1	chr10:121485609-121588790	+	0.470067	0.0194715
RTN1-201	RTN1	ENST00000267484.9_2	chr14:60062695-60337684	-	0.470138	0.0179749
CAPN7-201	CAPN7	ENST00000253693.6_1	chr3:15247750-15294425	+	0.470832	0.0395448
MAPK1-202	MAPK1	ENST00000398822.7_1	chr22:22123329-22221970	-	0.471159	0.0460786
MAPK3-212	MAPK3	ENST00000484663.5_1	chr16:30125427-30134289	-	0.471556	0.00431493
MRPL4-201	MRPL4	ENST00000253099.10_2	chr19:10362643-10370721	+	0.472175	0.00825745
SLC10A3-202	SLC10A3	ENST00000369649.8_1	chrX:153715645-153718953	-	0.472411	0.0315063
WDR34-201	WDR34	ENST00000372715.6_1	chr9:131395940-131419066	-	0.472858	0.034873
CUTA-214	CUTA	ENST00000607266.5_1	chr6:33384327-33385708	-	0.473221	0.0178824
TMEM71-201	TMEM71	ENST00000356838.7_1	chr8:133722194-133772828	-	0.473599	0.0328148
CDK17-211	CDK17	ENST00000552496.5_1	chr12:96704890-96793182	-	0.473763	0.0396334
MEST-202	MEST	ENST00000341441.9_1	chr7:130126012-130146133	+	0.473836	0.0377563
CTBS-202	CTBS	ENST00000370630.5_1	chr1:85015289-85040147	-	0.474083	0.00533528
DNAJC19-201	DNAJC19	ENST00000382564.6_1	chr3:180701497-180707561	-	0.474157	0.000568206
WDR36-203	WDR36	ENST00000506538.6_1	chr5:110427414-110466200	+	0.474265	0.00847742
MARCH2-207	2019-03-02	ENST00000601724.5_1	chr19:8478179-8491557	+	0.474843	0.0350023
HMG20A-202	HMG20A	ENST00000381714.7_1	chr15:77713016-77777945	+	0.475386	0.00835996
WWTR1-203	WWTR1	ENST00000465804.5_1	chr3:149235022-149421060	-	0.476036	0.0495094
NFE2-204	NFE2	ENST00000553070.5_1	chr12:54686158-54694799	-	0.476146	0.0260231
PHF20L1-214	PHF20L1	ENST00000485595.5_1	chr8:133787644-133812206	+	0.476384	0.0250731
HSDL1-201	HSDL1	ENST00000219439.8_1	chr16:84155886-84178793	-	0.47675	0.0265414
PPIL1-201	PPIL1	ENST00000373699.5_1	chr6:36822603-36842800	-	0.476835	0.0220871
CD1D-201	CD1D	ENST00000368171.3_1	chr1:158149737-158154686	+	0.477097	0.0174611
DENND2D-202	DENND2D	ENST00000369752.5_1	chr1:111729796-111747031	-	0.47775	0.0261828
PIK3C2B-203	PIK3C2B	ENST00000415899.1_3	chr1:204438538-204463852	-	0.477934	0.0459871
SGO2-201	SGO2	ENST00000357799.8_1	chr2:201390880-201448505	+	0.478193	0.020883
BMS1-201	BMS1	ENST00000374518.5_1	chr10:43278249-43330385	+	0.478472	0.0408894
SCRN3-201	SCRN3	ENST00000272732.10_1	chr2:175260473-175294303	+	0.47861	0.00503736
DAPP1-201	DAPP1	ENST00000296414.11_1	chr4:100737990-100791311	+	0.478848	0.0117548
ITM2B-202	ITM2B	ENST00000378565.9_1	chr13:48807294-48844493	+	0.478876	0.0202877
MRPL10-201	MRPL10	ENST00000290208.11_1	chr17:45900827-45907039	-	0.479211	0.00708307
B4GALT6-202	B4GALT6	ENST00000306851.9_1	chr18:29203132-29264686	-	0.479231	0.0193422
RUFY2-203	RUFY2	ENST00000388768.6_2	chr10:70103276-70166946	-	0.479276	0.0187312
AQR-201	AQR	ENST00000156471.9_1	chr15:35143983-35262040	-	0.479432	0.00460316
HHEX-203	HHEX	ENST00000492654.3_1	chr10:94451789-94454545	+	0.479447	0.0469632
AL358113.1-201	AL358113.1	ENST00000600472.1	chr9:71869331-71869642	-	0.479817	0.0374201
PHPT1-201	PHPT1	ENST00000247665.11_1	chr9:139743546-139745474	+	0.479853	0.0351921
NFU1-203	NFU1	ENST00000410022.6_1	chr2:69622882-69664760	-	0.480394	0.0380584
TAF12-201	TAF12	ENST00000263974.4_1	chr1:28929613-28969517	-	0.480441	0.0202051
XYLT2-201	XYLT2	ENST00000017003.6_1	chr17:48423453-48438512	+	0.480902	0.0205751
KIFC3-226	KIFC3	ENST00000566648.5_3	chr16:57805492-57837334	-	0.481192	0.00270328
SLC25A16-207	SLC25A16	ENST00000609923.5_1	chr10:70237758-70287231	-	0.481602	0.0308542
TMEM126B-202	TMEM126B	ENST00000393375.5_3	chr11:85339617-85347583	+	0.48175	0.0428453
EXOC2-201	EXOC2	ENST00000230449.8_1	chr6:485133-693111	-	0.481823	0.0393725
RALA-201	RALA	ENST00000005257.6_1	chr7:39663082-39747723	+	0.481847	0.0385629
HMGB1-203	HMGB1	ENST00000341423.9_1	chr13:31030841-31040102	-	0.481911	0.0429595
ARMCX6-201	ARMCX6	ENST00000361910.8_1	chrX:100870110-100872991	-	0.4824	0.028463
CANX-205	CANX	ENST00000502673.5_1	chr5:179125978-179147495	+	0.482462	0.0271431
USPL1-201	USPL1	ENST00000255304.8_1	chr13:31191920-31233686	+	0.482992	0.0135584
HBP1-208	HBP1	ENST00000468410.5_1	chr7:106809406-106842953	+	0.483112	0.0242591
HTRA2-201	HTRA2	ENST00000258080.7_1	chr2:74756504-74760475	+	0.483366	0.0113839
SYAP1-201	SYAP1	ENST00000380155.3_1	chrX:16737755-16783459	+	0.483905	0.0495834
SLC6A4-201	SLC6A4	ENST00000261707.7_2	chr17:28521339-28562986	-	0.48407	0.0279285
LDB1-202	LDB1	ENST00000425280.1_1	chr10:103867340-103880210	-	0.484797	0.0492014
ZNF24-202	ZNF24	ENST00000399061.3_1	chr18:32912191-32924420	-	0.48494	0.0424506
SCCPDH-201	SCCPDH	ENST00000366510.3_1	chr1:246887349-246931439	+	0.485264	0.00890165
ICAM2-203	ICAM2	ENST00000449662.6_1	chr17:62079955-62084292	-	0.485685	0.0494822
[truncated: 526 more rows]

## Sheet: Sheet2
Supplementary Table S9 List of differentially expressed proteins between HSP and HSPN
Protein name	Gene name	ENTREZID	Chromosomal location	Fold change	p_value
Complement C9	C9	735	chr5:39284262-39424868	0.355924	0.000405405
Apolipoprotein C-I	APOC1	341	chr19:44914247-44919349	1.87877	0.00449324
SWI/SNF-related matrix-associated actin-dependent regulator of chromatin subfamily D member 1	SMARCD1	6602	chr12:50084972-50100712	1.50282	0.0280405
Tyrosine 3-Monooxygenase/Tryptophan 5-Monooxygenase Activation Protein Eta	YWHAH	7533	chr22:31944461-31957603	0.469052	0.000692568
LIM And SH3 Protein 1	LASP1	3927	chr17:38869859-38921770	0.664764	0.0159966
Apolipoprotein A1	APOA1	335	chr11:116835751-116837950	1.5038	0.00190878
EGF Containing Fibulin Extracellular Matrix Protein 2	EFEMP2	30008	chr11:65866441-65873592	0.396489	0.000388514
Actinin Alpha 1	ACTN1	87	chr14:68874123-68979440	0.336469	0.000405405
Fibulin 5	FBLN5	10516	chr14:91869411-91947987	0.463104	0.00189189
Serpin Family A Member 5	SERPINA5	5104	chr14:94561442-94593120	0.562637	0.00121622
Prolyl 4-Hydroxylase Subunit Beta	P4HB	5034	chr17:81843158-81860694	0.299127	0.000692568
TIMP Metallopeptidase Inhibitor 2	TIMP2	7077	chr17:78852977-78925390	1.85696	0.000135135
Proteoglycan 4	PRG4	10216	chr1:186296273-186314562	1.68028	0.00128378
Complement C1q C Chain	C1QC	714	chr1:22643625-22648110	0.411409	1.69e-05
Complement C1q B Chain	C1QB	713	chr1:22652762-22661552	0.551498	0.00121622
Complement C1q A Chain	C1QA	712	chr1:22636506-22639682	0.434646	0.00246622
Matrix Gla protein	MGP	4256	chr12:14881181-14885926	1.53303	0.00702703
Cadherin 2	CDH2	1000	chr18:27932879-28177481	1.51654	0.0110473
FAT Atypical Cadherin 1	FAT1	2195	chr4:186587783-186726915	1.63116	0.0138514
Complement C1s	C1s	716	chr12:6988259-7071032	0.340985	0
Retinol Binding Protein 4	RBP4	5950	chr10:93591687-93601744	1.54803	0.0010473
Cholesteryl ester transfer protein, plasma	CETP	1071	chr16:56961850-56983845	0.541213	0.0228885
Protein S	PROS1	5627	chr3:93873033-93980003	0.512845	0.000489865
Superoxide dismutase 3	SOD3	6649	chr4:24789912-24800845	1.57275	0.00952703
Proteasome Subunit Beta 1	PSMB1	5689	chr6:170535116-170553341	0.478216	0.0360473
Apolipoprotein C3	APOC3	345	chr11:116829706-116833072	1.6006	0.000489865
Coagulation Factor VII	F7	2155	chr13:113105788-113120681	0.261578	0
Ceruloplasmin	CP	1356	chr3:149162410-149222055	0.243995	0
Angiopoietin Like 3	ANGPTL3	27329	chr1:62597487-62606305	1.57484	0.00189189
Carnosine Dipeptidase 1	CNDP1	84735	chr18:74534440-74587212	0.578131	0.00179054
Cartilage Oligomeric Matrix Protein	COMP	1311	chr19:18782773-18791314	0.380591	3.38e-05
Nucleobindin 1	NUCB1	4924	chr19:48900050-48923372	1.74253	0.00381757
S100 Calcium Binding Protein A9	S100A9	6280	chr1:153357854-153361027	0.582897	0.00118243
Coagulation factor XIII	F13A1	2162	chr6:6144078-6321013	0.494256	0.00111487
Apolipoprotein F	APOF	319	chr12:56360569-56362823	2.53322	0.000844595
Secreted Protein Acidic And Cysteine Rich	SPARC	6678	chr5:151661096-151687165	0.619654	0.00994932
Phospholipid Transfer Protein	PLTP	5360	chr20:45898620-45912364	0.639695	0.00967905
Protein C, Inactivator Of Coagulation Factors Va And VIIIa	PROC	5624	chr2:127418405-127429246	0.582626	0.0429392
Growth Arrest Specific 6	GAS6	2621	chr13:113820549-113864103	0.536478	0.000810811
Actin Beta	PS1TP5BP1	60	chr7:5527147-5563784	0.56753	0.00283784
Tyrosine 3-Monooxygenase/Tryptophan 5-Monooxygenase Activation Protein Zeta	YWHAZ	7534	chr8:100916525-100954596	0.413795	5.07e-05
Cadherin 6	CDH6	1004	chr5:31193655-31329146	1.5773	0
Serpin Family G Member 1	SERPING1	710	chr11:57597387-57614853	2.07269	5.07e-05
Collagen Type I Alpha 1 Chain	COL1A1	1277	chr17:50183289-50201648	1.77988	0.0296622
APOC4-APOC2 Readthrough (NMD Candidate)	APOC4-APOC2	344	chr19:44942238-44949565	1.9611	0.00158784
Heat Shock Protein 90 Alpha Family Class A Member 1	HSP90AA1	3320	chr14:102080738-102139759	0.272967	0
Ficolin (collagen/fibrinogen domain containing) 1	FCN1	2219	chr9:134905890-134917963	1.54043	0.0128547
Cellular Communication Network Factor 5	WISP2	8839	chr20:44714844-44728509	1.92606	0.00662162
Coagulation Factor VIII	F8	2157	chrX:154835788-155026940	0.636015	0.0466554
Coagulation Factor II, Thrombin	F2	2147	chr11:46719180-46739506	0.328107	0
Coagulation Factor X	F10	2159	chr13:113122799-113149529	0.543002	0.00027027
Complement C3	C3	718	chr19:6677704-6730562	0.606743	0.00991554
Apolipoprotein A2	APOA2	336	chr1:161222292-161223631	1.73326	0.000472973
Orosomucoid 1	ORM1	5004	chr9:114323023-114326479	1.66831	0.0185304
Secretory Leukocyte Peptidase Inhibitor	SLPI	6590	chr20:45252239-45254564	1.61605	0.00133446
Insulin Like Growth Factor 1	IGF1	3479	chr12:102395867-102481786	1.52107	0.000337838
S100 Calcium Binding Protein A8	S100A8	6279	chr1:153390032-153422578	0.582213	0.00684122
Serpin Family D Member 1	SERPIND1	3053	chr22:20773879-20787720	0.419472	0.0141723
Apolipoprotein A4	APOA4	337	chr11:116820700-116823306	1.70361	0.000810811
Complement C8 Beta Chain	C8A	731	chr1:56929210-56966140	0.505841	0.00190878
Vascular Cell Adhesion Molecule 1	VCAM1	7412	chr1:100719640-100739045	1.65871	0.0287162
Carboxypeptidase N Subunit 2	CPN2	1370	chr3:194339765-194351345	0.654024	0.00114865
Paraoxonase 1	PON1	5444	chr7:95297676-95324707	0.632371	0.012348
Calreticulin	CALR	811	chr19:12938578-12944490	0.256845	0.000185811
Cadherin 5	CDH5	1003	chr16:66366622-66404786	1.51779	0.000912162
Complement Factor H Related 2	CFHR2	3080	chr1:196943756-196959226	1.63615	0.00695946
Lumican	LUM	4060	chr12:91102629-91111831	2.17142	0
Valosin Containing Protein	VCP	7415	chr9:35056064-35073249	0.564283	0.00559122
Cadherin 11	CDH11	1009	chr16:64943753-65126112	1.58868	0
Inhibin, beta E	INHBE	83729	chr12:57452323-57459280	1.95727	0.0316723
Tubulin Alpha 4a	TUBA4A	7277	chr2:219249711-219278170	0.453358	0.00238176
Complement Factor H Related 1	CFHR1	3078	chr1:196819731-196832189	1.55716	0.0150169
Inter-Alpha-Trypsin Inhibitor Heavy Chain 3	ITIH3	3699	chr3:52794768-52809009	1.57738	0.0282432
Lysyl Oxidase Like 1	LOXL1	4016	chr15:73925989-73952137	1.67133	0.00202703
Hyaluronan Binding Protein 2	HABP2	3026	chr10:113550831-113589602	2.26099	0
Paraoxonase 3	PON3	5446	chr7:95359872-95396375	0.524812	5.07e-05
Out At First Homolog	OAF	220323	chr11:120210767-120230332	1.6179	0.00202703
Proprotein Convertase Subtilisin/Kexin Type 1 Inhibitor	PCSK1N	27344	chrX:48831092-48835638	1.61143	0.000692568
Notch 3	NOTCH3	4854	chr19:15159038-15200981	0.596095	0.00202703
-	S6B2B6	-	-	0.395	0.0445101
-	S6C4Q9	-	-	1.55146	0.0380236
