# Supplementary material for: An Integrated Transcriptomic and Proteomic Analysis Identifies Significant Novel Pathways for Henoch-Schönlein Purpura Nephritis Progression
Source: Biomed Res Int. 2020 Jun 19;2020:2489175. doi: 10.1155/2020/2489175 (PMC7322592; doi:10.1155/2020/2489175)
Supplement: Supplementary Materials — .Supplementary Figure S1: images of renal pathological sections of HSPN patients. (A) Type 1. (B) Type 2. (C) Type 3. Supplementary Figure S2: PCA score plots for discriminating samples within the different groups. Supplementary Figure S3: correlation analysis of differentially expressed mRNAs and proteins between different types of HSPN. Supplementary Table S1: list of quantitated 24,493 mRNAs and 592 proteins. Supplementary Table S2: list of differentially expressed mRNAs between different HSPN types. Supplementary Table S3: list of differentially expressed proteins between different HSPN types. Supplementary Table S4: list of DEGs which were differentially expressed between HSPN type 1 and HSPN type 2 and HSPN type 2 and HSPN type 3. Supplementary Table S5: the significant pathways enriched by DEGs between different HSPN types. Supplementary Table S6: the correlation coefficients between differentially expressed genes in four pathways and clinical biochemical indicators. Supplementary Table S7: list of mRNAs and proteins selected for validation. Supplementary Table S8: the significant pathways enriched by downregulated DEGs between HSP and HSPN. Supplementary Table S9: list of differentially expressed mRNAs between HSP and HSPN. Supplementary Table S10: the differentially expressed genes in four pathways negative regulation of the JAK-STAT cascade and so on. [file 2489175.f1.zip › Supplementary Table S10.xlsx]

## Sheet: Sheet1
Supplementary Table S10 The differentially expressed genes in four pathways
negative regulation of JAK-STAT cascade
Track_id	Trans_Name	Gene_id	Gene_Name	Locus	Strand	Trans_Type	contrasting groups	Fold change	p_value
ENST00000164227.9_1	BCL3-201	ENSG00000069399.14_3	BCL3	chr19:45251804-45263301	+	protein_coding	Type 1 vs Type 2	14.5616	0.0386635
ENST00000330871.3_1	SOCS3-201	ENSG00000184557.4_3	SOCS3	chr17:76352859-76356158	-	protein_coding	Type 1 vs Type 2	8.11517	0.0390757
ENST00000332029.2_1	SOCS1-201	ENSG00000185338.4_2	SOCS1	chr16:11348262-11350036	-	protein_coding	Type 1 vs Type 2	8.01378	0.0155989
ENST00000481195.5_1	PPP2CA-203	ENSG00000113575.9_3	PPP2CA	chr5:133530025-133561833	-	protein_coding	Type 1 vs Type 2	5.74096	0.0229301
ENST00000322088.10_1	PPP2R1A-201	ENSG00000105568.17_3	PPP2R1A	chr19:52693292-52732786	+	protein_coding	Type 1 vs Type 2	2.37706	0.0364874
ENST00000361976.6_1	INPP5F-201	ENSG00000198825.12_3	INPP5F	chr10:121485609-121588790	+	protein_coding	Type 1 vs Type 2	1.99869	0.0498498
mTOR signaling pathway
ENST00000394434.6_1	LARS-202	ENSG00000133706.17_2	LARS	chr5:145492601-145562223	-	protein_coding	Type 1 vs Type 2	9.51788	0.00215082
ENST00000372901.1_1	UBR2-202	ENSG00000024048.10_2	UBR2	chr6:42531800-42661242	+	protein_coding	Type 1 vs Type 2	7.5734	0.0124413
ENST00000273814.7_1	DGKQ-201	ENSG00000145214.13_3	DGKQ	chr4:952675-967344	-	protein_coding	Type 1 vs Type 2	6.47107	0.00144413
ENST00000391833.5_1	AKT1S1-205	ENSG00000204673.10_3	AKT1S1	chr19:50372295-50378542	-	protein_coding	Type 1 vs Type 2	6.10416	0.00650427
ENST00000305264.7_1	HDAC3-201	ENSG00000171720.9_2	HDAC3	chr5:141000443-141016437	-	protein_coding	Type 1 vs Type 2	5.59706	0.0480447
ENST00000278616.8_1	ATM-201	ENSG00000149311.18_2	ATM	chr11:108093559-108239826	+	protein_coding	Type 1 vs Type 2	5.39715	0.0247487
ENST00000258439.7_1	TMEM127-201	ENSG00000135956.8_2	TMEM127	chr2:96914254-96931732	-	protein_coding	Type 1 vs Type 2	4.99075	0.0220407
ENST00000212015.10_1	SIRT1-201	ENSG00000096717.11_2	SIRT1	chr10:69644427-69678147	+	protein_coding	Type 1 vs Type 2	4.45188	0.0111807
ENST00000554581.5_1	AKT1-208	ENSG00000142208.15_3	AKT1	chr14:105235686-105260461	-	protein_coding	Type 1 vs Type 2	4.01392	0.0218546
ENST00000265070.6_1	GOLPH3-201	ENSG00000113384.13_2	GOLPH3	chr5:32124810-32174456	-	protein_coding	Type 1 vs Type 2	3.90413	0.00375147
ENST00000373218.4_1	EIF4EBP2-201	ENSG00000148730.6_2	EIF4EBP2	chr10:72164135-72188374	+	protein_coding	Type 1 vs Type 2	3.68908	0.0229821
ENST00000270162.6_1	SIK1-201	ENSG00000142178.7_2	SIK1	chr21:44834395-44847008	-	protein_coding	Type 1 vs Type 2	3.54263	0.0320624
ENST00000409790.5_2	CLEC16A-203	ENSG00000038532.14_3	CLEC16A	chr16:11038345-11276046	+	protein_coding	Type 1 vs Type 2	3.45829	0.046283
ENST00000361445.8_2	MTOR-201	ENSG00000198793.12_3	MTOR	chr1:11166592-11322564	-	protein_coding	Type 1 vs Type 2	3.22846	0.00821837
ENST00000615660.4_1	FNIP1-205	ENSG00000217128.11_3	FNIP1	chr5:130977408-131132756	-	protein_coding	Type 1 vs Type 2	3.09795	0.0444015
ENST00000357387.7_1	RICTOR-202	ENSG00000164327.12_3	RICTOR	chr5:38938021-39074510	-	protein_coding	Type 1 vs Type 2	3.01421	0.0242678
ENST00000398249.8_1	GSK3A-202	ENSG00000105723.11_3	GSK3A	chr19:42734342-42746045	-	protein_coding	Type 1 vs Type 2	2.94236	0.00491078
ENST00000219476.7_1	TSC2-201	ENSG00000103197.16_3	TSC2	chr16:2097466-2138713	+	protein_coding	Type 1 vs Type 2	2.51902	0.0136559
ENST00000550735.6_1	MAPKAPK5-206	ENSG00000089022.13_2	MAPKAPK5	chr12:112279782-112340042	+	protein_coding	Type 1 vs Type 2	1.85432	0.0223959
SWI/SNF superfamily-type complex
ENST00000368339.9_2	YY1AP1-210	ENSG00000163374.19_3	YY1AP1	chr1:155629234-155658447	-	protein_coding	Type 1 vs Type 2	8.64287	0.00830452
ENST00000278823.6_1	MTA2-201	ENSG00000149480.6_2	MTA2	chr11:62360686-62369312	-	protein_coding	Type 1 vs Type 2	8.60333	0.0224413
ENST00000254480.9_1	SMARCC1-201	ENSG00000173473.10_3	SMARCC1	chr3:47626762-47823407	-	protein_coding	Type 1 vs Type 2	8.31199	0.00522575
ENST00000435036.6_1	MTA1-207	ENSG00000182979.17_4	MTA1	chr14:105886157-105937064	+	protein_coding	Type 1 vs Type 2	7.30479	0.0413308
ENST00000448276.6_1	SMARCD2-203	ENSG00000108604.15_3	SMARCD2	chr17:61909444-61920300	-	protein_coding	Type 1 vs Type 2	6.71115	0.000562958
ENST00000283131.3_1	SMARCA5-201	ENSG00000153147.5_2	SMARCA5	chr4:144434616-144478639	+	protein_coding	Type 1 vs Type 2	4.01247	0.0338341
ENST00000583931.5_3	ANP32E-208	ENSG00000143401.14_4	ANP32E	chr1:150190717-150208504	-	protein_coding	Type 1 vs Type 2	3.74027	0.0460793
ENST00000288266.7_1	APPL1-201	ENSG00000157500.10_3	APPL1	chr3:57261765-57307496	+	protein_coding	Type 1 vs Type 2	3.66681	0.035841
ENST00000382203.5_1	SMARCA2-209	ENSG00000080503.22_3	SMARCA2	chr9:2021945-2193624	+	protein_coding	Type 1 vs Type 2	3.63749	0.0321316
ENST00000392811.6_1	SMARCD3-203	ENSG00000082014.16_2	SMARCD3	chr7:150936059-150974538	-	protein_coding	Type 1 vs Type 2	3.5372	0.044583
ENST00000333577.8_1	EP400-203	ENSG00000183495.13_2	EP400	chr12:132434516-132479557	+	protein_coding	Type 1 vs Type 2	2.76644	0.0182038
ENST00000314073.9_1	BICRAL-201	ENSG00000112624.12_3	BICRAL	chr6:42749765-42836298	+	protein_coding	Type 1 vs Type 2	2.70657	0.0265561
Wnt signaling pathway
ENST00000392870.2_1	GRK5-202	ENSG00000198873.11_3	GRK5	chr10:120967101-121215131	+	protein_coding	Type 2 vs Type 3	26.8474	0.0290078
ENST00000312989.11_1	PPP1CA-201	ENSG00000172531.14_2	PPP1CA	chr11:67165654-67169264	-	protein_coding	Type 2 vs Type 3	15.4783	0.00796788
ENST00000396751.6_1	ILK-202	ENSG00000166333.13_3	ILK	chr11:6625046-6632101	+	protein_coding	Type 2 vs Type 3	4.56473	0.014826
ENST00000536769.1_1	UBC-205	ENSG00000150991.14_3	UBC	chr12:125396150-125399894	-	protein_coding	Type 2 vs Type 3	3.76345	0.00976865
ENST00000400335.8_1	KREMEN1-202	ENSG00000183762.12_2	KREMEN1	chr22:29469066-29542808	+	protein_coding	Type 2 vs Type 3	3.37787	0.0410952
ENST00000566780.5_1	WWOX-214	ENSG00000186153.16_3	WWOX	chr16:78133310-79246564	+	protein_coding	Type 2 vs Type 3	2.41107	0.0272108
